# Supplementary material for: Novel Pathological Mechanisms Revealed by Spatial Transcriptomic Analysis of Hippocampus in Aged Control, Primary Age-Related Tauopathy, and Alzheimer’s Disease
Source: Research Square preprint supplement (doi:10.21203/rs.3.rs-7303622/v1), 2025-08-22
Supplement: Supplementary file 1 [file 2d5c825aacbc7f5746c2d555.xlsx]

## Sheet: CA1_GO_result
Unnamed: 0	Rank	Term name	P-value	Z-score	Combined score	Overlapping genes	Adjusted p-value	Old p-value	Old adjusted p-value
0	1	Positive Regulation Of Synaptic Transmission (GO:0050806)	1.43982e-13	10.5477	311.886	['RGS14', 'SYT1', 'CLSTN3', 'PLK2', 'CLSTN1', 'AKAP5', 'GRIN2B', 'SHISA7', 'SLC8A2', 'GRIN1', 'RIMS4', 'CACNG8', 'GRIN2A', 'DLG4', 'NPTN', 'KCTD13', 'PTK2B', 'CACNG3', 'SHANK2', 'VAMP2', 'LGMN']	3.68449e-10	0	0
1	2	Chemical Synaptic Transmission (GO:0007268)	4.58264e-13	4.62075	131.282	['GABRB3', 'GRIA1', 'GABRB2', 'GRIA2', 'SNAP25', 'GABRB1', 'CHRM1', 'CACNA1E', 'LIN7B', 'GRIN2A', 'SLC17A7', 'TSPOAP1', 'GRIA3', 'CHRNB2', 'SYT5', 'GABRA1', 'UNC13A', 'PTPRN2', 'SLC12A5', 'HOMER1', 'SYT1', 'GABRA5', 'GABRA4', 'MINK1', 'GABRA3', 'HTR1A', 'GRIN2B', 'GABRG2', 'SYN1', 'GRIN1', 'CACNB1', 'CACNB2', 'CACNB3', 'DLG3', 'GLRB', 'DLG4', 'KCNQ2', 'APBA2']	5.86349e-10	0	0
2	3	Modulation Of Chemical Synaptic Transmission (GO:0050804)	1.00405e-12	7.20176	198.963	['GRIA1', 'GRIA2', 'CLSTN3', 'PLPPR4', 'CLSTN1', 'TPRG1L', 'CPLX2', 'SLC8A2', 'BEGAIN', 'PPP3CA', 'RIMS4', 'DLGAP3', 'GRIA3', 'DLGAP4', 'CHRNB2', 'CDKL5', 'UNC13A', 'HOMER1', 'IQSEC2', 'SYT1', 'MAPK8IP2', 'SYN1', 'SLC4A8', 'DLG4', 'KCTD13']	8.56458e-10	0	0
3	4	Neuron Projection Development (GO:0031175)	7.03983e-12	5.24911	134.794	['NCKAP1', 'GPM6A', 'CNTNAP2', 'RASGRF1', 'STMN2', 'STMN3', 'BHLHE22', 'WASL', 'PPP1R9B', 'SAMD14', 'PAK1', 'ATCAY', 'ZFYVE27', 'MAP2', 'NEUROD6', 'NCDN', 'PAK3', 'SH3GL2', 'EPHA4', 'UNC5A', 'MINK1', 'NMNAT2', 'L1CAM', 'UHMK1', 'SLC9A6', 'DLG4', 'ULK1', 'LRP12', 'CDK5R1', 'ZPR1']	4.50373e-09	0	0
4	5	Neuron Development (GO:0048666)	9.63904e-11	5.63824	130.032	['GPM6A', 'CNTNAP2', 'TENM2', 'MYT1L', 'RASGRF1', 'STMN2', 'STMN3', 'PPP1R9B', 'SAMD14', 'ATCAY', 'ZFYVE27', 'MAP2', 'DMD', 'NCDN', 'SH3GL2', 'EPHA5', 'UNC5A', 'TBCD', 'ETV1', 'L1CAM', 'UHMK1', 'NOVA2', 'ULK1', 'LRP12', 'CDK5R1']	4.93326e-08	0	0
5	6	Synaptic Vesicle Exocytosis (GO:0016079)	8.23535e-10	12.9269	270.397	['SYT5', 'SNAP25', 'SNAP47', 'SYT4', 'RAB3A', 'UNC13A', 'SYT1', 'DOC2B', 'CPLX2', 'RIMS4', 'PIP5K1C', 'STX1A', 'VAMP2']	3.29718e-07	0	0
6	7	Regulation Of Neuronal Synaptic Plasticity (GO:0048168)	9.01924e-10	15.1696	315.93	['GRIN2A', 'SYNGR1', 'RAB3A', 'DLG4', 'SLC4A10', 'NCDN', 'SYP', 'GRIN2B', 'SHISA7', 'DBN1', 'SLC8A2', 'GRIN1']	3.29718e-07	0	0
7	8	Regulation Of Monoatomic Ion Transmembrane Transporter Activity (GO:0032412)	1.60916e-09	8.43092	170.706	['PRRT1', 'HOMER1', 'MINK1', 'NEDD4L', 'MAPK8IP2', 'SHISA7', 'CACNG8', 'DLG4', 'PTK2B', 'FXYD7', 'FXYD6', 'GPD1L', 'SCN3B', 'SCN4B', 'CACNG3', 'HCN1']	4.7031e-07	0	0
8	9	Neuron Projection Morphogenesis (GO:0048812)	1.70102e-09	5.25661	106.142	['NCKAP1', 'EPHA4', 'GPM6A', 'SPTBN4', 'CNTNAP2', 'FARP1', 'RAB3A', 'ATL1', 'PLPPR4', 'MINK1', 'WASL', 'MAPK8IP2', 'BAIAP2', 'PAK1', 'SLC9A6', 'SLITRK2', 'MAP2', 'DLG4', 'SLITRK4', 'ADGRB1', 'MAP1A', 'CTNNA2', 'PAK3']	4.7031e-07	0	0
9	10	Regulation Of Voltage-Gated Calcium Channel Activity (GO:1901385)	1.87252e-09	16.9746	341.122	['CACNB1', 'PPP3CA', 'CACNB2', 'PPP3CB', 'PPP3R1', 'CACNB3', 'NOS1AP', 'DMD', 'AKAP5', 'GNB5', 'CBARP']	4.7031e-07	0	0
10	11	Anterograde Trans-Synaptic Signaling (GO:0098916)	2.02165e-09	4.42753	88.6363	['GABRB3', 'GRIA1', 'GABRB2', 'GRIA2', 'SNAP25', 'GABRB1', 'CHRM1', 'CACNA1E', 'GRIN2A', 'CHRNB2', 'SYT5', 'SLC12A5', 'HOMER1', 'SYT1', 'MINK1', 'HTR1A', 'GRIN2B', 'SYN1', 'GRIN1', 'CACNB1', 'CACNB2', 'CACNB3', 'DLG3', 'GLRB', 'DLG4', 'KCNQ2', 'APBA2']	4.7031e-07	0	0
11	12	Chloride Transmembrane Transport (GO:1902476)	7.18071e-09	10.3377	193.852	['GABRB3', 'GABRB2', 'GABRA1', 'GABRB1', 'SLC12A5', 'GABRA5', 'GABRA4', 'GABRA3', 'ANO5', 'GABRG2', 'ANO3', 'SLC4A8', 'GLRB']	1.53129e-06	0	0
12	13	Cell Morphogenesis Involved In Neuron Differentiation (GO:0048667)	8.84239e-09	7.32218	135.78	['SPTBN4', 'FARP1', 'RAB3A', 'ATL1', 'PLPPR4', 'MINK1', 'TBCD', 'MAPK8IP2', 'BAIAP2', 'SLITRK2', 'MAP2', 'SLITRK4', 'ADGRB1', 'MAP1A', 'CTNNA2', 'PAK3']	1.58198e-06	0	0
13	14	Gamma-Aminobutyric Acid Signaling Pathway (GO:0007214)	9.46709e-09	22.6693	418.825	['GABRB3', 'GABRA1', 'GABRB2', 'GABRB1', 'GABRA5', 'GABRA4', 'GABRA3', 'GABRG2', 'SHISA7']	1.58198e-06	0	0
14	15	Long-Term Synaptic Potentiation (GO:0060291)	9.46709e-09	22.6693	418.825	['GRIN2A', 'RGS14', 'PLK2', 'NPTN', 'PTK2B', 'GRIN2B', 'SHANK2', 'VAMP2', 'SLC8A2']	1.58198e-06	0	0
15	16	Axon Development (GO:0061564)	9.89122e-09	6.21511	114.554	['SPTBN4', 'RAB3A', 'ATL1', 'PLPPR4', 'RTN4RL2', 'BHLHE22', 'NMNAT2', 'L1CAM', 'BAIAP2', 'SLITRK2', 'NEUROD6', 'RTN4RL1', 'SLITRK4', 'MAP1A', 'CTNNA2', 'PAK3', 'CDK5R1', 'ZPR1']	1.58198e-06	0	0
16	17	Axonogenesis (GO:0007409)	1.20901e-08	4.31523	78.6704	['CYFIP2', 'SPTBN4', 'RAB3A', 'ARHGEF25', 'ATL1', 'PLPPR4', 'KALRN', 'PPP3CB', 'SLITRK2', 'SLITRK4', 'CTNNA2', 'SLIT2', 'PAK3', 'EPHA5', 'EPHA4', 'EPHA6', 'L1CAM', 'BAIAP2', 'NELL2', 'NELL1', 'SLC9A6', 'MAP1A', 'ANOS1', 'ULK1', 'CDK5R1']	1.81991e-06	0	0
17	18	Neurotransmitter Secretion (GO:0007269)	1.88507e-08	10.7605	191.394	['SNAP25', 'RAB3A', 'PTPRN2', 'UNC13A', 'SYT1', 'DOC2B', 'PIP5K1C', 'CPLX2', 'LIN7B', 'SYN1', 'STX1A', 'VAMP2']	2.67993e-06	0	0
18	19	Inorganic Anion Transmembrane Transport (GO:0098661)	3.03611e-08	7.95783	137.751	['GABRB3', 'GABRB2', 'GABRA1', 'GABRB1', 'SLC12A5', 'GABRA5', 'GABRA4', 'GABRA3', 'ANO5', 'GABRG2', 'ANO3', 'SLC4A8', 'GLRB', 'SLC25A11']	4.08916e-06	0	0
19	20	Monoatomic Anion Transmembrane Transport (GO:0098656)	3.39381e-08	8.82215	151.73	['GABRB3', 'GABRB2', 'GABRA1', 'GABRB1', 'SLC12A5', 'GABRA5', 'GABRA4', 'GABRA3', 'ANO5', 'GABRG2', 'ANO3', 'SLC4A8', 'GLRB']	4.34238e-06	0	0
20	21	Regulation Of Synaptic Transmission, Glutamatergic (GO:0051966)	4.30222e-08	8.61165	146.067	['UNC13A', 'HOMER1', 'SYT1', 'PLPPR4', 'TPRG1L', 'MAPK8IP2', 'GRIN2B', 'GRIN1', 'CACNG8', 'GRIN2A', 'PTK2B', 'CACNG3', 'HCN1']	5.24256e-06	0	0
21	22	Signal Release From Synapse (GO:0099643)	4.87445e-08	11.3111	190.442	['SNAP25', 'RAB3A', 'PTPRN2', 'UNC13A', 'SYT1', 'PIP5K1C', 'CPLX2', 'LIN7B', 'SYN1', 'STX1A', 'VAMP2']	5.66987e-06	0	0
22	23	Chloride Transport (GO:0006821)	6.43619e-08	6.74369	111.667	['GABRB3', 'GABRB2', 'GABRA1', 'GABRB1', 'SLC12A5', 'GABRA5', 'GABRA4', 'GABRA3', 'SLC4A10', 'ANO5', 'GABRG2', 'ANO3', 'SLC4A8', 'GLRB', 'SLC17A7']	7.16096e-06	0	0
23	24	Nervous System Development (GO:0007399)	8.98999e-08	2.80918	45.5777	['NCKAP1', 'GPM6A', 'NRSN1', 'CHRM1', 'SHC3', 'MYT1L', 'STMN3', 'LDB2', 'CYP46A1', 'VXN', 'KALRN', 'RAPGEFL1', 'NRGN', 'ADAM23', 'DPF1', 'ENC1', 'PCDH1', 'SH3GL2', 'FARP1', 'ARNT2', 'RBFOX2', 'LSAMP', 'CRIM1', 'LIG4', 'L1CAM', 'NELL1', 'GLRB', 'DLG4', 'FABP7', 'SCN8A', 'ADGRB1', 'KCNQ2', 'SERPINI1', 'TAGLN3', 'LY6H', 'SCN2A', 'APBA2', 'SHANK2', 'ADGRL3']	9.58558e-06	0	0
24	25	Positive Regulation Of Developmental Growth (GO:0048639)	1.18973e-07	8.77512	139.914	['SYT4', 'ZFYVE27', 'CDKL5', 'UNC13A', 'SYT1', 'CPNE6', 'TWF2', 'NEDD4L', 'RASAL1', 'PLCB1', 'L1CAM', 'SYT17']	1.21781e-05	0	0
25	26	Calcium-Ion Regulated Exocytosis (GO:0017156)	1.45611e-07	14.6638	230.842	['SYT5', 'SYT4', 'PPP3CB', 'RIMS4', 'RAB3A', 'SYT1', 'DOC2B', 'VAMP2', 'SYT17']	1.43315e-05	0	0
26	27	Regulation Of Neurotransmitter Receptor Activity (GO:0099601)	1.52472e-07	9.84959	154.602	['PRRT1', 'CACNG8', 'DLG4', 'MINK1', 'PTK2B', 'DLGAP3', 'MAPK8IP2', 'CACNG3', 'SHISA7', 'BEGAIN', 'DLGAP4']	1.44509e-05	0	0
27	28	Synaptic Transmission, GABAergic (GO:0051932)	1.81512e-07	27.6332	428.922	['GABRB3', 'GABRA1', 'GABRB2', 'GABRA5', 'GABRA4', 'GABRA3', 'GABRG2']	1.60978e-05	0	0
28	29	Calcium Ion Transmembrane Import Into Cytosol (GO:0097553)	1.82429e-07	6.14674	95.3784	['CACNA2D1', 'ITPR1', 'ATP2B4', 'CACNA1E', 'GRIN2B', 'SLC8A1', 'SLC8A2', 'GRIN1', 'JPH4', 'CACNB3', 'GRIN2A', 'JPH3', 'SCN8A', 'PLCB1', 'SCN2A']	1.60978e-05	0	0
29	30	Learning (GO:0007612)	1.98404e-07	9.54129	147.25	['CHRNB2', 'CNTNAP2', 'PPP3CB', 'RGS14', 'SYNJ1', 'DLG4', 'MAP1A', 'MAPK8IP2', 'SHANK2', 'SLC8A2', 'LGMN']	1.69239e-05	0	0
30	31	Regulation Of Neuron Projection Development (GO:0010975)	2.22741e-07	4.05666	62.1369	['EPHA4', 'PRKCI', 'NDRG4', 'CDKL5', 'STMN2', 'TWF2', 'RTN4RL2', 'CX3CL1', 'ARHGAP44', 'PAK1', 'BAG5', 'RTN4RL1', 'NOVA2', 'CHN1', 'NPTN', 'PTK2B', 'SERPINI1', 'CTNNA2', 'PAK3', 'DBN1', 'LZTS3', 'CDK5R1']	1.83534e-05	0	0
31	32	Glutamate Receptor Signaling Pathway (GO:0007215)	2.29507e-07	11.0906	169.546	['GRIA2', 'GRIN2A', 'HOMER1', 'HOMER2', 'PTK2B', 'PLCB1', 'GRIN2B', 'GRIA3', 'GRIN1', 'CDK5R1']	1.83534e-05	0	0
32	33	Regulation Of Cation Channel Activity (GO:2001257)	4.50818e-07	7.57615	110.704	['JPH4', 'CACNB1', 'CACNB2', 'CACNB3', 'CAMK2D', 'JPH3', 'HOMER1', 'FKBP1B', 'KCNAB1', 'DMD', 'VAMP2', 'HCN1']	3.49589e-05	0	0
33	34	Memory (GO:0007613)	6.74995e-07	7.246	102.955	['CHRNB2', 'PRNP', 'PPP3CB', 'RGS14', 'PLK2', 'RASGRF1', 'MAP1A', 'PLCB1', 'SCN2A', 'SHISA7', 'SLC8A2', 'LGMN']	5.08033e-05	0	0
34	35	Regulation Of Monoatomic Cation Transmembrane Transport (GO:1904062)	6.99575e-07	9.55892	135.477	['DPP6', 'GRIN2A', 'HOMER1', 'KCNIP4', 'NEDD4L', 'KCNN2', 'KCNAB1', 'GRIN2B', 'GRIN1', 'HCN1']	5.1149e-05	0	0
35	36	Plasma Membrane Bounded Cell Projection Organization (GO:0120036)	9.11933e-07	4.40841	61.3109	['GPM6A', 'CNTNAP2', 'UNC5A', 'RASGRF1', 'STMN2', 'STMN3', 'L1CAM', 'UHMK1', 'PPP1R9B', 'SAMD14', 'ATCAY', 'ZFYVE27', 'MAP2', 'ULK1', 'NCDN', 'SH3GL2', 'LRP12', 'CDK5R1']	6.48232e-05	0	0
36	37	Positive Regulation Of Dendrite Extension (GO:1903861)	9.37508e-07	19.3403	268.444	['SYT4', 'UNC13A', 'SYT1', 'CPNE6', 'NEDD4L', 'RASAL1', 'SYT17']	6.48401e-05	0	0
37	38	Ionotropic Glutamate Receptor Signaling Pathway (GO:0035235)	1.44708e-06	27.5951	371.043	['GRIA2', 'GRIN2A', 'PTK2B', 'GRIN2B', 'CDK5R1', 'GRIN1']	9.0319e-05	0	0
38	39	Negative Regulation Of Voltage-Gated Calcium Channel Activity (GO:1901386)	1.44708e-06	27.5951	371.043	['PPP3CA', 'PPP3CB', 'PPP3R1', 'CALM3', 'GNB5', 'CBARP']	9.0319e-05	0	0
39	40	Positive Regulation Of Regulated Secretory Pathway (GO:1903307)	1.44708e-06	27.5951	371.043	['SCAMP5', 'SLC4A8', 'SYT4', 'RAB3A', 'RAB15', 'STX1A']	9.0319e-05	0	0
40	41	Positive Regulation Of Voltage-Gated Calcium Channel Activity (GO:1901387)	1.44708e-06	27.5951	371.043	['CACNB2', 'PPP3CA', 'CACNB3', 'PPP3CB', 'PPP3R1', 'CACNA2D1']	9.0319e-05	0	0
41	42	Regulation Of Dendrite Extension (GO:1903859)	1.48747e-06	17.5811	235.911	['SYT4', 'UNC13A', 'SYT1', 'CPNE6', 'NEDD4L', 'RASAL1', 'SYT17']	9.06293e-05	0	0
42	43	Calcium Ion Transport (GO:0006816)	1.95587e-06	4.64417	61.0461	['CHRNB2', 'SLC24A3', 'CACNA2D1', 'ITPR1', 'ATP2B4', 'ATP2A2', 'ATP2B2', 'SLC8A1', 'SLC8A2', 'CACNB1', 'CACNB2', 'CACNB3', 'CACNG8', 'STIM2', 'CACNG3', 'RAMP1']	0.000116397	0	0
43	44	Synaptic Vesicle Recycling (GO:0036465)	2.32826e-06	8.15108	105.723	['SYT5', 'RAB3A', 'SYT1', 'SYNJ1', 'PIP5K1C', 'AP2B1', 'GIT1', 'DNM1', 'STX1A', 'VAMP2']	0.000134774	0	0
44	45	Regulation Of Postsynaptic Membrane Potential (GO:0060078)	2.47533e-06	9.58339	123.713	['GABRA1', 'GRIN2A', 'GABRA5', 'GABRA4', 'GABRA3', 'MAPK8IP2', 'GRIN2B', 'GABRG2', 'GRIN1']	0.000134774	0	0
45	46	Regulation Of Regulated Secretory Pathway (GO:1903305)	2.47533e-06	9.58339	123.713	['SYT5', 'SYT4', 'RIMS4', 'RAB3A', 'SYT1', 'RAB15', 'DOC2B', 'SYN1', 'SYT17']	0.000134774	0	0
46	47	Dendrite Morphogenesis (GO:0048813)	2.47533e-06	9.58339	123.713	['FARP1', 'MAP2', 'DLG4', 'MINK1', 'PHACTR1', 'WASL', 'CTNNA2', 'PAK3', 'MAPK8IP2']	0.000134774	0	0
47	48	Regulation Of Short-Term Neuronal Synaptic Plasticity (GO:0048172)	2.60722e-06	23.6517	304.096	['SYNGR1', 'RAB3A', 'SLC4A10', 'SYP', 'SHISA7', 'SLC8A2']	0.000138997	0	0
48	49	Regulation Of Calcium Ion Transmembrane Transport (GO:1903169)	3.40653e-06	14.8748	187.271	['CACNB1', 'PRNP', 'CAMK2D', 'CACNA2D1', 'NOS1AP', 'PTK2B', 'CBARP']	0.000177904	0	0
49	50	Negative Regulation Of Cation Channel Activity (GO:2001258)	3.80686e-06	11.0617	138.036	['PPP3CA', 'PPP3CB', 'PPP3R1', 'FKBP1B', 'KCNAB1', 'CALM3', 'GNB5', 'CBARP']	0.000191015	0	0
50	51	Regulation Of Calcium Ion-Dependent Exocytosis (GO:0017158)	3.80686e-06	11.0617	138.036	['SCAMP5', 'SYT5', 'SYT4', 'SYT1', 'DOC2B', 'STX1A', 'CBARP', 'SYT17']	0.000191015	0	0
51	52	Positive Regulation Of Signaling (GO:0023056)	4.09441e-06	8.89794	110.387	['NSF', 'RIMS4', 'HOMER1', 'SYT1', 'CLSTN3', 'DLG4', 'CLSTN1', 'KCTD13', 'OCRL']	0.000201492	0	0
52	53	Calcium Ion Transport Into Cytosol (GO:0060402)	6.0091e-06	34.4482	414.145	['JPH4', 'CACNB3', 'JPH3', 'CACNA2D1', 'SLC8A1']	0.000290137	0	0
53	54	Synaptic Vesicle Endocytosis (GO:0048488)	8.18687e-06	8.0356	94.1208	['SYT5', 'SYT1', 'SYNJ1', 'PIP5K1C', 'AP2B1', 'SH3GL2', 'DNM1', 'STX1A', 'VAMP2']	0.000387966	0	0
54	55	Presynaptic Endocytosis (GO:0140238)	8.79826e-06	9.61737	111.955	['SYT5', 'SYT1', 'SYNJ1', 'PIP5K1C', 'AP2B1', 'DNM1', 'STX1A', 'VAMP2']	0.000409359	0	0
55	56	Exocytosis (GO:0006887)	9.45095e-06	4.94667	57.23	['NSF', 'SNAP25', 'CADPS2', 'SNAP47', 'RAB3A', 'WIPF3', 'CADPS', 'DOC2B', 'SYNGR3', 'SYTL5', 'SYNGR1', 'STX1A', 'VAMP2']	0.000430823	0	0
56	57	Regulated Exocytosis (GO:0045055)	9.59629e-06	6.75697	78.071	['SNAP25', 'PPP3CB', 'SYNGR1', 'RAB3A', 'PIP5K1C', 'SYNGR3', 'CPLX2', 'STX1A', 'VAMP2', 'SYT17']	0.000430823	0	0
57	58	Metal Ion Transport (GO:0030001)	1.00984e-05	3.48816	40.1247	['CHRNB2', 'KCNH3', 'KCNF1', 'NDFIP2', 'CACNA2D1', 'ITPR1', 'KCNAB1', 'ATP2B2', 'CACNB3', 'CACNG8', 'SCN8A', 'KCNN2', 'SLC17A7', 'SCN3B', 'SCN2A', 'SCN4B', 'CACNG3', 'RAMP1', 'KCNJ3']	0.000445548	0	0
58	59	Regulation Of Calcium Ion Transmembrane Transporter Activity (GO:1901019)	1.13707e-05	9.21616	104.921	['JPH4', 'CACNB1', 'CACNB2', 'CAMK2D', 'CACNB3', 'JPH3', 'FKBP1B', 'DMD']	0.000493179	0	0
59	60	Regulation Of Calcium Ion Transmembrane Transport Via High Voltage-Gated Calcium Channel (GO:1902514)	1.16688e-05	27.5571	313.01	['CACNB1', 'CACNB2', 'CAMK2D', 'CACNA2D1', 'NOS1AP']	0.000497675	0	0
60	61	Ephrin Receptor Signaling Pathway (GO:0048013)	1.53609e-05	7.32543	81.1928	['EPHA5', 'EPHA4', 'PAK1', 'EPHA6', 'CHN1', 'PAK3', 'KALRN', 'ANKS1B', 'CDK5R1']	0.000644403	0	0
61	62	Cellular Response To Amyloid-Beta (GO:1904646)	1.8441e-05	8.50635	92.7271	['CACNB1', 'EPHA4', 'PRNP', 'GRIN2A', 'CACNA2D1', 'ATP1A3', 'GRIN1', 'LGMN']	0.000761136	0	0
62	63	Protein Phosphorylation (GO:0006468)	1.93005e-05	2.25289	24.456	['CAMK2D', 'PNCK', 'MAST3', 'MAST1', 'CAMKK2', 'PPP3CB', 'PAK1', 'CAMKV', 'ATG101', 'TLK1', 'PTK2B', 'MAP3K9', 'PAK3', 'PDK2', 'PRKCG', 'PRRT1', 'EPHA5', 'EPHA4', 'PRKCI', 'MAP2K1', 'CDKL5', 'EPHA6', 'PRKCB', 'PLK2', 'MINK1', 'LMTK3', 'PRKCA', 'UHMK1', 'MAPK10', 'SNRK', 'PRKAR1B', 'KIT', 'MAPKAPK5', 'ULK1', 'CDK14', 'CAMK1G', 'CDK5R1']	0.000783968	0	0
63	64	Cellular Response To Histamine (GO:0071420)	2.16989e-05	55.0442	591.079	['GABRB3', 'GABRB2', 'GABRB1', 'GABRG2']	0.000854269	0	0
64	65	Negative Regulation Of Neuron Projection Regeneration (GO:0070571)	2.16989e-05	55.0442	591.079	['EPHA4', 'RTN4RL1', 'OCRL', 'THY1']	0.000854269	0	0
65	66	Calcium Ion Transmembrane Transport (GO:0070588)	2.24573e-05	4.8961	52.4074	['CACNB1', 'CACNB3', 'GRIN2A', 'SLC24A3', 'CACNA2D1', 'ATP2B4', 'ATP2A2', 'ATP2B1', 'GRIN2B', 'SLC8A1', 'SLC8A2', 'GRIN1']	0.000870731	0	0
66	67	Vesicle-Mediated Transport In Synapse (GO:0099003)	2.42465e-05	13.7933	146.584	['SNAP25', 'RAB3A', 'PIP5K1C', 'CPLX2', 'STX1A', 'VAMP2']	0.00092607	0	0
67	68	Central Nervous System Development (GO:0007417)	2.55167e-05	2.71275	28.6905	['NCKAP1', 'CNTNAP2', 'NDRG4', 'RTN1', 'SHC3', 'MAST1', 'AFF2', 'GRIN2A', 'ADAM23', 'NNAT', 'GIT1', 'SH3GL2', 'ARNT2', 'MINK1', 'ATP6AP2', 'LIG4', 'GRIN2B', 'GRIN1', 'SYNJ1', 'TAGLN3', 'SERPINI1', 'CDK5R2', 'ADGRL3', 'CDK5R1', 'ZPR1']	0.000960252	0	0
68	69	Cardiac Conduction (GO:0061337)	2.73056e-05	6.73043	70.7262	['SPTBN4', 'CACNB2', 'CAMK2D', 'CACNA2D1', 'PKP2', 'SCN3B', 'SCN4B', 'KCNJ3', 'HCN1']	0.00101268	0	0
69	70	Cellular Response To Salt (GO:1902075)	2.91982e-05	4.09475	42.755	['SYT5', 'EGR1', 'SYT4', 'CAMK2D', 'DMTN', 'SYT1', 'CPNE6', 'ATP2B4', 'PDXP', 'PPP1R9B', 'SYT17', 'DLG4', 'ITPKA', 'LGMN']	0.0010674	0	0
70	71	Regulation Of Actin Filament-Based Process (GO:0032970)	3.14311e-05	5.16768	53.5771	['ARHGAP44', 'EPHA5', 'PAK1', 'DMTN', 'FSCN1', 'TWF2', 'ABRACL', 'PAK3', 'BAIAP2', 'CORO1A', 'CORO2B']	0.00111812	0	0
71	72	Synaptic Transmission, Glutamatergic (GO:0035249)	3.14595e-05	9.66511	100.196	['GRIA1', 'GRIA2', 'GRIN2A', 'UNC13A', 'SLC17A7', 'GRIN2B', 'GRIA3']	0.00111812	0	0
72	73	Negative Regulation Of Calcium Ion Transmembrane Transport (GO:1903170)	3.43833e-05	12.7316	130.855	['PPP3CA', 'PPP3CB', 'PPP3R1', 'FKBP1B', 'VDAC1', 'CBARP']	0.0012053	0	0
73	74	Regulation Of Sodium Ion Transmembrane Transporter Activity (GO:2000649)	3.57154e-05	7.62519	78.0814	['CAMK2D', 'NEDD4L', 'FXYD7', 'DMD', 'FXYD6', 'GPD1L', 'SCN3B', 'SCN4B']	0.00121861	0	0
74	75	Synaptic Vesicle Cycle (GO:0099504)	3.57154e-05	7.62519	78.0814	['SNAP25', 'RAB3A', 'SLC17A7', 'PIP5K1C', 'CPLX2', 'GIT1', 'STX1A', 'VAMP2']	0.00121861	0	0
75	76	Regulation Of Sodium Ion Transmembrane Transport (GO:1902305)	4.06771e-05	9.20439	93.055	['CAMK2D', 'NEDD4L', 'FXYD7', 'FXYD6', 'GPD1L', 'SCN3B', 'SCN4B']	0.00136964	0	0
76	77	Calcium-Mediated Signaling (GO:0019722)	4.17699e-05	4.55957	45.9756	['CNKSR2', 'PPP3CA', 'PRNP', 'PPP3CB', 'SAMD14', 'PPP3R1', 'DMTN', 'FKBP1B', 'ATP2A2', 'SLC8A1', 'PPP1R9B', 'CAMKK2']	0.00137586	0	0
77	78	Protein Localization To Cell Periphery (GO:1990778)	4.19372e-05	3.53289	35.6092	['SPTBN4', 'RAB3A', 'TESC', 'KCNIP4', 'ZDHHC23', 'MYO5A', 'LIN7B', 'CACNB2', 'EFR3A', 'CACNB3', 'DPP6', 'ZFYVE27', 'PACS1', 'PKP2', 'SCN3B', 'RAMP1']	0.00137586	0	0
78	79	Regulation Of Cardiac Muscle Contraction By Calcium Ion Signaling (GO:0010882)	4.76591e-05	11.8216	117.642	['CAMK2D', 'FKBP1B', 'ATP2A2', 'CALM3', 'DMD', 'SLC8A1']	0.00154379	0	0
79	80	Monoatomic Cation Transmembrane Transport (GO:0098655)	6.30392e-05	2.61067	25.2498	['KCNH3', 'KCNF1', 'SLC24A3', 'ATP6AP2', 'ATP2B4', 'ATP2A2', 'ATP1A3', 'GRIN2B', 'SLC8A1', 'GRIN1', 'SLC8A2', 'CACNB1', 'SLC4A8', 'GRIN2A', 'SLC9A6', 'KCNQ2', 'ATP6V1H', 'KCNN2', 'ATP6V1E1', 'SCN3B', 'SCN2A', 'ATP6V1D', 'SCN4B', 'HCN1']	0.00198021	0	0
80	81	Regulation Of Release Of Sequestered Calcium Ion Into Cytosol (GO:0051279)	6.44349e-05	5.92765	57.2009	['JPH4', 'CAMK2D', 'JPH3', 'FKBP1B', 'PTK2B', 'DMD', 'CALM3', 'THY1', 'CX3CL1']	0.00198021	0	0
81	82	Regulation Of Cardiac Conduction (GO:1903779)	6.4741e-05	11.0329	106.414	['ATP2B4', 'ATP2A2', 'ATP2B2', 'ATP2B1', 'SLC8A1', 'SLC8A2']	0.00198021	0	0
82	83	Positive Regulation Of Monoatomic Ion Transport (GO:0043270)	6.4804e-05	6.90925	66.6338	['CACNB2', 'CHRM1', 'STIM2', 'PKP2', 'ATP2B1', 'GPD1L', 'SCN3B', 'SCN4B']	0.00198021	0	0
83	84	Negative Regulation Of Calcium Ion Transmembrane Transporter Activity (GO:1901020)	6.57748e-05	8.40314	80.9161	['PPP3CA', 'PPP3CB', 'PPP3R1', 'FKBP1B', 'CALM3', 'GNB5', 'CBARP']	0.00198021	0	0
84	85	Positive Regulation Of Cell Communication (GO:0010647)	6.57748e-05	8.40314	80.9161	['RIMS4', 'HOMER1', 'SYT1', 'CLSTN3', 'DLG4', 'CLSTN1', 'KCTD13']	0.00198021	0	0
85	86	Regulation Of Secretion By Cell (GO:1903530)	7.53199e-05	5.12683	48.6729	['NSF', 'RAB3A', 'SYT1', 'SCG5', 'HTR1A', 'STXBP5', 'CPLX2', 'SYN1', 'VAMP2', 'STXBP5L']	0.0022412	0	0
86	87	Regulation Of Heart Rate By Cardiac Conduction (GO:0086091)	7.80501e-05	6.69953	63.3653	['CACNB2', 'CAMK2D', 'CACNA2D1', 'PKP2', 'SCN3B', 'SCN4B', 'KCNJ3', 'HCN1']	0.00229575	0	0
87	88	Calcium Ion-Regulated Exocytosis Of Neurotransmitter (GO:0048791)	8.24036e-05	15.3063	143.939	['SYT5', 'SYT4', 'RIMS4', 'UNC13A', 'SYT1']	0.00236933	0	0
88	89	Synaptic Vesicle Membrane Organization (GO:0048499)	8.24036e-05	15.3063	143.939	['SNAP25', 'SNAP47', 'SYNGR1', 'SYP', 'STX1A']	0.00236933	0	0
89	90	Acetylcholine Receptor Signaling Pathway (GO:0095500)	8.63767e-05	10.3428	96.7755	['CHRNB2', 'CHRM1', 'LYPD1', 'LY6H', 'PLCB1', 'CDK5R1']	0.00242899	0	0
90	91	Positive Regulation Of Synaptic Transmission, Glutamatergic (GO:0051968)	8.63767e-05	10.3428	96.7755	['CACNG8', 'GRIN2A', 'PTK2B', 'GRIN2B', 'CACNG3', 'GRIN1']	0.00242899	0	0
91	92	Response To Calcium Ion (GO:0051592)	9.0664e-05	3.87883	36.1055	['SYT5', 'SYT4', 'CAMK2D', 'DMTN', 'HOMER1', 'SYT1', 'CPNE6', 'SYT17', 'PPP3CA', 'ITPKA', 'CALM3', 'SLC25A12', 'LGMN']	0.00252184	0	0
92	93	Positive Regulation Of Calcium Ion-Dependent Exocytosis (GO:0045956)	9.56787e-05	27.5193	254.677	['SCAMP5', 'SYT4', 'SYT1', 'STX1A']	0.00263271	0	0
93	94	Protein Localization To Plasma Membrane (GO:0072659)	0.000100381	3.41643	31.4535	['SPTBN4', 'RAB3A', 'TESC', 'KCNIP4', 'ZDHHC23', 'MYO5A', 'CACNB2', 'EFR3A', 'CACNB3', 'DPP6', 'ZFYVE27', 'PACS1', 'PKP2', 'SCN3B', 'RAMP1']	0.0027327	0	0
94	95	Regulation Of Exocytosis (GO:0017157)	0.000102509	5.53161	50.8109	['NSF', 'CADPS2', 'RAB3A', 'SYT1', 'CADPS', 'STXBP5', 'CPLX2', 'VAMP2', 'STXBP5L']	0.00274403	0	0
95	96	Brain Development (GO:0007420)	0.000102942	3.11191	28.5715	['CNTNAP2', 'ARNT2', 'NDRG4', 'RTN1', 'MAST1', 'MINK1', 'GRIN2B', 'AFF2', 'GRIN1', 'GRIN2A', 'SYNJ1', 'NNAT', 'CTNNA2', 'GIT1', 'CDK5R2', 'ADGRL3', 'CDK5R1']	0.00274403	0	0
96	97	Regulation Of Filopodium Assembly (GO:0051489)	0.000111318	6.31605	57.4957	['ARHGAP44', 'GPM6A', 'RIPOR2', 'NELL1', 'TENM2', 'DMTN', 'FSCN1', 'WASL']	0.00290677	0	0
97	98	Response To Amyloid-Beta (GO:1904645)	0.000111318	6.31605	57.4957	['CACNB1', 'EPHA4', 'PRNP', 'GRIN2A', 'CACNA2D1', 'ATP1A3', 'GRIN1', 'LGMN']	0.00290677	0	0
98	99	Axon Extension (GO:0048675)	0.000113396	9.73391	88.4289	['NELL2', 'NELL1', 'PPP3CB', 'SLC9A6', 'ULK1', 'SLIT2']	0.00293112	0	0
99	100	Generation Of Neurons (GO:0048699)	0.000127809	3.0512	27.3539	['GPM6A', 'MAP2K1', 'CDKL5', 'RTN1', 'MYT1L', 'ATP2B2', 'VXN', 'SH3RF1', 'NELL1', 'NOVA2', 'TAFA1', 'ANOS1', 'KIAA0319', 'LRP12', 'ASTN1', 'ADGRL3', 'CDK5R1']	0.00327062	0	0
100	101	Cellular Response To Peptide (GO:1901653)	0.000137157	5.29567	47.1018	['CACNB1', 'EPHA4', 'PRNP', 'GRIN2A', 'CACNA2D1', 'ATP1A3', 'LDOC1', 'GRIN1', 'LGMN']	0.00347007	0	0
101	102	Phosphorylation (GO:0016310)	0.000138315	2.18379	19.4051	['CAMK2D', 'MAST1', 'CAMKK2', 'PPP3CB', 'PAK1', 'ATG101', 'TLK1', 'PTK2B', 'MAP3K9', 'PAK3', 'PDK2', 'PRKCG', 'PRRT1', 'EPHA5', 'EPHA4', 'PRKCI', 'MAP2K1', 'CDKL5', 'EPHA6', 'PRKCB', 'PLK2', 'MINK1', 'LMTK3', 'PRKCA', 'MAPK10', 'SNRK', 'PRKAR1B', 'TOLLIP', 'PI4KA', 'ULK1', 'CDK14']	0.00347007	0	0
102	103	Regulation Of Ryanodine-Sensitive Calcium-Release Channel Activity (GO:0060314)	0.000146713	9.19266	81.1439	['JPH4', 'CAMK2D', 'JPH3', 'FKBP1B', 'CALM3', 'DMD']	0.00360999	0	0
103	104	Regulation Of AMPA Receptor Activity (GO:2000311)	0.000146713	9.19266	81.1439	['PRRT1', 'CACNG8', 'MINK1', 'MAPK8IP2', 'CACNG3', 'SHISA7']	0.00360999	0	0
104	105	Peptidyl-Serine Phosphorylation (GO:0018105)	0.000150814	3.1322	27.5617	['PRKCG', 'PRKCI', 'CAMK2D', 'PNCK', 'PRKCB', 'MAST3', 'PLK2', 'MAST1', 'PRKCA', 'UHMK1', 'CAMKV', 'TLK1', 'MAPKAPK5', 'ULK1', 'CAMK1G', 'CDK5R1']	0.00367555	0	0
105	106	Regulation Of calcineurin-NFAT Signaling Cascade (GO:0070884)	0.000153759	7.15674	62.8371	['PPP3CA', 'PRNP', 'PPP3CB', 'PPP3R1', 'HOMER2', 'ATP2B4', 'AKAP5']	0.00371198	0	0
106	107	Protein Localization To Membrane (GO:0072657)	0.000160548	2.87924	25.1556	['SPTBN4', 'RAB3A', 'TESC', 'KCNIP4', 'ZDHHC23', 'MYO5A', 'THY1', 'CYP46A1', 'LIN7B', 'CACNB2', 'EFR3A', 'CACNB3', 'DPP6', 'ZFYVE27', 'PACS1', 'PKP2', 'SCN3B', 'RAMP1']	0.00383966	0	0
107	108	Regulation Of High Voltage-Gated Calcium Channel Activity (GO:1901841)	0.000167415	22.0143	191.415	['CACNB2', 'CACNB3', 'NOS1AP', 'CALM3']	0.00390846	0	0
108	109	Response To Histamine (GO:0034776)	0.000167415	22.0143	191.415	['GABRB3', 'GABRB2', 'GABRB1', 'GABRG2']	0.00390846	0	0
109	110	Membrane Depolarization During Cardiac Muscle Cell Action Potential (GO:0086012)	0.000169535	12.5221	108.722	['CACNB2', 'CACNA2D1', 'SCN3B', 'SCN4B', 'SLC8A1']	0.00390846	0	0
110	111	Regulation Of Cardiac Muscle Contraction By Regulation Of The Release Of Sequestered Calcium Ion (GO:0010881)	0.000169535	12.5221	108.722	['CAMK2D', 'FKBP1B', 'CALM3', 'DMD', 'SLC8A1']	0.00390846	0	0
111	112	Regulation Of Signal Transduction (GO:0009966)	0.000171376	2.86263	24.8238	['TSPYL2', 'GALNT11', 'PRNP', 'HOMER1', 'RGS14', 'YJEFN3', 'GSKIP', 'MAPK8IP2', 'CX3CL1', 'SLC8A2', 'RGS4', 'NELL1', 'RGS2', 'FRRS1L', 'NCK2', 'PLCB1', 'GIT1', 'RGS7']	0.00391563	0	0
112	113	Regulation Of Sodium Ion Transport (GO:0002028)	0.000186406	6.90079	59.2611	['SPTBN4', 'ATP2B4', 'PKP2', 'NEDD4L', 'GPD1L', 'SCN3B', 'SCN4B']	0.00416839	0	0
113	114	Regulation Of Postsynapse Organization (GO:0099175)	0.000187325	8.70838	74.7411	['ARHGAP44', 'EPHA4', 'CDKL5', 'HOMER1', 'LZTS3', 'CDK5R1']	0.00416839	0	0
114	115	Regulation Of Synapse Organization (GO:0050807)	0.000187325	8.70838	74.7411	['CHRNB2', 'EPHA4', 'CDKL5', 'SLITRK2', 'SLITRK4', 'CTNNA2']	0.00416839	0	0
115	116	Synapse Organization (GO:0050808)	0.000218959	3.32099	27.9847	['GPM6A', 'FARP1', 'UNC13A', 'CHCHD10', 'L1CAM', 'CX3CL1', 'SLC8A2', 'CACNB1', 'CACNB2', 'CACNB3', 'SLITRK2', 'PAK3', 'SHANK2', 'ADGRL3']	0.00483031	0	0
116	117	Regulation Of Trans-Synaptic Signaling (GO:0099177)	0.000224431	6.66248	55.9778	['GRIA1', 'GRIA2', 'PPP3CA', 'SLC4A8', 'CDKL5', 'IQSEC2', 'GRIA3']	0.0049087	0	0
117	118	Negative Regulation Of Protein Polymerization (GO:0032272)	0.000236314	8.27253	69.0785	['MAP2', 'STMN2', 'TWF2', 'TBCD', 'SLIT2', 'PFN2']	0.0051248	0	0
118	119	Peptidyl-Serine Modification (GO:0018209)	0.000266594	2.96391	24.3923	['PRKCG', 'PRKCI', 'CAMK2D', 'PNCK', 'PRKCB', 'MAST3', 'PLK2', 'MAST1', 'PRKCA', 'UHMK1', 'CAMKV', 'TLK1', 'MAPKAPK5', 'ULK1', 'CAMK1G', 'CDK5R1']	0.00573289	0	0
119	120	Regulation Of Long-Term Neuronal Synaptic Plasticity (GO:0048169)	0.000271247	18.3443	150.652	['SYNGR1', 'DLG4', 'NPTN', 'SYP']	0.00573653	0	0
120	121	Regulation Of Calcium Ion Import Across Plasma Membrane (GO:1905664)	0.000271247	18.3443	150.652	['PPP3CA', 'PRNP', 'PPP3CB', 'PPP3R1']	0.00573653	0	0
121	122	Positive Regulation Of Filopodium Assembly (GO:0051491)	0.000294844	7.87819	64.0423	['GPM6A', 'RIPOR2', 'NELL1', 'TENM2', 'FSCN1', 'WASL']	0.00613419	0	0
122	123	Regulation Of Catecholamine Secretion (GO:0050433)	0.000294844	7.87819	64.0423	['CHRNB2', 'SYT5', 'SYT4', 'SYT1', 'STX1A', 'SYT17']	0.00613419	0	0
123	124	Associative Learning (GO:0008306)	0.000313612	10.5945	85.4696	['CHRNB2', 'RGS14', 'MAP1A', 'GRIN1', 'LGMN']	0.00636932	0	0
124	125	Cardiac Muscle Cell Contraction (GO:0086003)	0.000313612	10.5945	85.4696	['CAMK2D', 'CACNA2D1', 'PKP2', 'SCN3B', 'SCN4B']	0.00636932	0	0
125	126	Response To Ethanol (GO:0045471)	0.000313612	10.5945	85.4696	['CHRNB2', 'GRIN2A', 'GOT2', 'GRIN2B', 'GRIN1']	0.00636932	0	0
126	127	Vesicle-Mediated Transport (GO:0016192)	0.000333923	2.12397	17.0015	['SNAP25', 'SNAP47', 'SPTBN4', 'RAB3A', 'WIPF3', 'DOC2B', 'WASL', 'KALRN', 'ZFYVE27', 'CHMP1A', 'REPS2', 'AP1S1', 'ATP6V1H', 'AP1M1', 'NSF', 'CADPS2', 'SYT4', 'PRKCI', 'CADPS', 'MYO5A', 'SYP', 'AP2B1', 'SYTL5', 'DNM1', 'OCIAD2', 'ARF5', 'VAMP2', 'STX1A', 'LRP12']	0.00672843	0	0
127	128	Regulation Of Actin Cytoskeleton Organization (GO:0032956)	0.000352284	3.80701	30.2698	['ARHGAP44', 'EPHA5', 'PAK1', 'DMTN', 'FSCN1', 'TWF2', 'PTK2B', 'PAK3', 'BAIAP2', 'CORO1A', 'CORO2B']	0.00704292	0	0
128	129	Regulation Of Cardiac Muscle Cell Action Potential (GO:0098901)	0.000364162	7.5197	59.5403	['CAMK2D', 'NOS1AP', 'PKP2', 'ATP2A2', 'CALM3', 'HCN1']	0.00722397	0	0
129	130	Regulation Of Peptidyl-Cysteine S-nitrosylation (GO:2000169)	0.000413547	41.2244	321.168	['NOS1AP', 'ATP2B4', 'DMD']	0.00791336	0	0
130	131	Negative Regulation Of Axon Regeneration (GO:0048681)	0.000413547	41.2244	321.168	['EPHA4', 'RTN4RL1', 'OCRL']	0.00791336	0	0
131	132	Nucleoside Triphosphate Biosynthetic Process (GO:0009142)	0.000413547	41.2244	321.168	['NME2', 'AK4', 'AK5']	0.00791336	0	0
132	133	Negative Regulation Of Vascular Permeability (GO:0043116)	0.000414377	15.7228	122.461	['DDAH1', 'PDE2A', 'SLIT2', 'SH3GL2']	0.00791336	0	0
133	134	Nucleoside Phosphate Biosynthetic Process (GO:1901293)	0.000414377	15.7228	122.461	['NME2', 'AK4', 'AK5', 'NMNAT2']	0.00791336	0	0
134	135	Neurotransmitter Transport (GO:0006836)	0.000437121	5.02178	38.845	['SNAP25', 'UNC13A', 'PTPRN2', 'SYT1', 'SYNJ1', 'SLC17A7', 'LIN7B', 'SYN1']	0.00828587	0	0
135	136	Cardiac Muscle Cell Action Potential (GO:0086001)	0.000445597	7.19239	55.4971	['CACNA2D1', 'PKP2', 'DMD', 'SCN3B', 'SCN4B', 'SLC8A1']	0.00832323	0	0
136	137	Response To Alcohol (GO:0097305)	0.000445597	7.19239	55.4971	['CHRNB2', 'GRIN2A', 'GOT2', 'SLIT2', 'GRIN2B', 'GRIN1']	0.00832323	0	0
137	138	Regulation Of Membrane Depolarization (GO:0003254)	0.000535231	9.18095	69.1584	['CAMK2D', 'NEDD4L', 'GPD1L', 'SCN3B', 'HCN1']	0.00992505	0	0
138	139	Cardiac Muscle Cell Action Potential Involved In Contraction (GO:0086002)	0.000540553	6.89235	51.8506	['CACNA2D1', 'PKP2', 'NEDD4L', 'GPD1L', 'SCN3B', 'SCN4B']	0.00995162	0	0
139	140	Positive Regulation Of Supramolecular Fiber Organization (GO:1902905)	0.000560196	3.58213	26.8202	['NCKAP1', 'PAK1', 'STMN2', 'NCK2', 'PDXP', 'PTK2B', 'SYNPO', 'BAIAP2', 'CX3CL1', 'PFN2', 'CDK5R1']	0.0102396	0	0
140	141	Negative Regulation Of Neuron Projection Development (GO:0010977)	0.000568144	4.80294	35.8931	['EPHA4', 'BAG5', 'RTN4RL1', 'BCL11A', 'STMN2', 'RTN4RL2', 'THY1', 'KIAA0319']	0.0103112	0	0
141	142	Sodium Ion Transmembrane Transport (GO:0035725)	0.000602703	3.84153	28.4814	['SLC4A8', 'SLC24A3', 'SLC9A6', 'ATP1A3', 'SCN3B', 'SCN2A', 'SCN4B', 'SLC8A1', 'SLC8A2', 'HCN1']	0.0104483	0	0
142	143	Positive Regulation Of Calcium Ion Transmembrane Transport (GO:1904427)	0.000603932	5.51862	40.9043	['PPP3CA', 'CACNB2', 'PPP3CB', 'PPP3R1', 'THY1', 'CX3CL1', 'GRIN1']	0.0104483	0	0
143	144	Aspartate Family Amino Acid Metabolic Process (GO:0009066)	0.000604279	13.7568	101.958	['GOT1', 'MTHFD1', 'GOT2', 'SLC25A12']	0.0104483	0	0
144	145	Atrial Cardiac Muscle Cell Action Potential (GO:0086014)	0.000604279	13.7568	101.958	['CACNB2', 'KCNN2', 'SCN3B', 'KCNJ3']	0.0104483	0	0
145	146	Relaxation Of Cardiac Muscle (GO:0055119)	0.000604279	13.7568	101.958	['CHGA', 'CAMK2D', 'RGS2', 'SLC8A1']	0.0104483	0	0
146	147	Negative Regulation Of Mononuclear Cell Migration (GO:0071676)	0.000604279	13.7568	101.958	['CCN3', 'SLIT2', 'WASL', 'PLCB1']	0.0104483	0	0
147	148	Positive Regulation Of Sodium Ion Transport (GO:0010765)	0.000604279	13.7568	101.958	['PKP2', 'GPD1L', 'SCN3B', 'SCN4B']	0.0104483	0	0
148	149	Positive Regulation Of Protein Kinase Activity (GO:0045860)	0.000621034	2.96391	21.8859	['EPHA4', 'EGR1', 'PRNP', 'MAP2K1', 'RALB', 'MMD', 'CAMKK1', 'SLC8A2', 'CAMKK2', 'DLG3', 'DLG4', 'PTK2B', 'CALM3', 'MAPRE3']	0.010666	0	0
149	150	Neuron Migration (GO:0001764)	0.000644632	4.70051	34.5338	['GPM6A', 'NELL1', 'CDKL5', 'KIAA0319', 'SH3RF1', 'LRP12', 'ASTN1', 'CDK5R1']	0.0109974	0	0
150	151	Modulation Of Excitatory Postsynaptic Potential (GO:0098815)	0.000650512	6.61631	48.5488	['GRIN2A', 'DLG4', 'PTK2B', 'GRIN2B', 'SLC8A2', 'GRIN1']	0.0110242	0	0
151	152	Regulation Of Heart Contraction (GO:0008016)	0.000683276	4.14547	30.2148	['SPTBN4', 'CAMK2D', 'ATP2B4', 'ATP2A2', 'ATP2B2', 'CALM3', 'ATP2B1', 'SLC8A1', 'SLC8A2']	0.0114281	0	0
152	153	Cellular Response To Calcium Ion (GO:0071277)	0.000683276	4.14547	30.2148	['SYT5', 'SYT4', 'CAMK2D', 'DMTN', 'SYT1', 'CPNE6', 'ITPKA', 'SYT17', 'LGMN']	0.0114281	0	0
153	154	Regulation Of Cytoskeleton Organization (GO:0051493)	0.000693805	3.2583	23.6986	['ARHGAP44', 'EPHA5', 'PAK1', 'DMTN', 'FSCN1', 'TWF2', 'STMN3', 'TRIM36', 'PAK3', 'BAIAP2', 'CORO1A', 'CORO2B']	0.0115289	0	0
154	155	Regulation Of G Protein-Coupled Receptor Signaling Pathway (GO:0008277)	0.000760013	4.0773	29.2839	['RGS4', 'RGS2', 'RGS14', 'YWHAB', 'SYP', 'PLCB1', 'GIT1', 'PPP1R9B', 'RGS7']	0.0125476	0	0
155	156	Axon Extension Involved In Axon Guidance (GO:0048846)	0.000805398	27.4815	195.783	['NELL2', 'NELL1', 'SLIT2']	0.0129905	0	0
156	157	Long-Term Synaptic Depression (GO:0060292)	0.000805398	27.4815	195.783	['PRRT1', 'PLK2', 'SHANK2']	0.0129905	0	0
157	158	Neuron Projection Extension Involved In Neuron Projection Guidance (GO:1902284)	0.000805398	27.4815	195.783	['NELL2', 'NELL1', 'SLIT2']	0.0129905	0	0
158	159	Regulation Of Cell-Substrate Adhesion (GO:0010810)	0.000807145	5.21978	37.1753	['DMTN', 'MINK1', 'TBCD', 'PKP2', 'THY1', 'CORO2B', 'CX3CL1']	0.0129905	0	0
159	160	Axon Guidance (GO:0007411)	0.000813835	2.87549	20.4555	['CYFIP2', 'EPHA5', 'EPHA4', 'EPHA6', 'UNC5A', 'ARHGEF25', 'L1CAM', 'KALRN', 'NELL2', 'NELL1', 'CHN1', 'ANOS1', 'SLIT2', 'CDK5R1']	0.0130163	0	0
160	161	Phosphate-Containing Compound Metabolic Process (GO:0006796)	0.000832953	2.64386	18.7464	['PRKCG', 'DUSP4', 'PLPPR2', 'PLPPR3', 'PLPPR4', 'PDXP', 'OCRL', 'DUSP8', 'PPP3CA', 'PPP3CB', 'PAK1', 'PFKL', 'SYNJ1', 'TOLLIP', 'PI4KA', 'PFKM']	0.0132393	0	0
161	162	Inhibitory Synapse Assembly (GO:1904862)	0.000848602	12.2276	86.4727	['GABRB3', 'GABRA1', 'GABRB2', 'GABRG2']	0.0132994	0	0
162	163	Regulation Of Dopamine Secretion (GO:0014059)	0.000857521	8.1	57.1979	['CHRNB2', 'SYT5', 'SYT4', 'SYT1', 'SYT17']	0.0132994	0	0
163	164	Regulation Of Release Of Sequestered Calcium Ion Into Cytosol By Sarcoplasmic Reticulum (GO:0010880)	0.000857521	8.1	57.1979	['CAMK2D', 'FKBP1B', 'CALM3', 'DMD', 'SLC8A1']	0.0132994	0	0
164	165	Positive Regulation Of Excitatory Postsynaptic Potential (GO:2000463)	0.000857521	8.1	57.1979	['GRIN2A', 'DLG4', 'PTK2B', 'GRIN2B', 'GRIN1']	0.0132994	0	0
165	166	Actin Filament Bundle Assembly (GO:0051017)	0.000921723	6.12558	42.8133	['DMTN', 'FSCN1', 'PDXP', 'BAIAP2', 'ADD2', 'LIMD2']	0.0140398	0	0
166	167	Regulation Of Lamellipodium Assembly (GO:0010591)	0.000921723	6.12558	42.8133	['NCKAP1', 'DMTN', 'ARPC2', 'TWF2', 'FSCN1', 'SLIT2']	0.0140398	0	0
167	168	Regulation Of Potassium Ion Transmembrane Transport (GO:1901379)	0.000921723	6.12558	42.8133	['DPP6', 'KCNIP4', 'NOS1AP', 'NEDD4L', 'KCNN2', 'KCNAB1']	0.0140398	0	0
168	169	Cellular Component Assembly (GO:0022607)	0.000952735	2.31813	16.1253	['CYFIP2', 'NCKAP1', 'DMTN', 'RTN1', 'CHCHD10', 'WASL', 'BAIAP2', 'LIMD2', 'ADD2', 'ZFYVE27', 'DLG4', 'CAPZA2', 'FSCN1', 'PKP2', 'REPS2', 'PTK2B', 'QSOX1', 'DMD', 'WASF1', 'VAMP2']	0.0144263	0	0
169	170	Inorganic Cation Import Across Plasma Membrane (GO:0098659)	0.00101514	3.30837	22.8037	['SLC12A5', 'SLC9A6', 'CACNA2D1', 'SCN8A', 'ATP2B4', 'ATP1A3', 'SCN2A', 'CACNA1E', 'SLC8A1', 'SLC8A2', 'KCNJ3']	0.0152809	0	0
170	171	Regulation Of Vesicle-Mediated Transport (GO:0060627)	0.0011497	3.49986	23.688	['NSF', 'NELL1', 'MAP2K1', 'RAB3A', 'SYT1', 'OCRL', 'STXBP5', 'CPLX2', 'VAMP2', 'STXBP5L']	0.0172052	0	0
171	172	Transmembrane Receptor Protein Tyrosine Kinase Signaling Pathway (GO:0007169)	0.00118692	2.22173	14.9665	['EPHA5', 'EPHA4', 'EPHA6', 'SHC3', 'RGS14', 'PIK3R2', 'BAIAP2', 'KALRN', 'NELL1', 'PAK1', 'ZFYVE27', 'DOK6', 'KIT', 'CHN1', 'PTK2B', 'GRB2', 'PLCB1', 'PAK3', 'PDK2', 'ANKS1B', 'CDK5R1']	0.0175065	0	0
172	173	Inorganic Cation Transmembrane Transport (GO:0098662)	0.00118692	2.22173	14.9665	['KCNH3', 'KCNF1', 'SLC24A3', 'ATP6AP2', 'ATP2B4', 'ATP2A2', 'ATP1A3', 'SLC8A1', 'SLC8A2', 'CACNB1', 'SLC4A8', 'SLC9A6', 'KCNQ2', 'ATP6V1H', 'KCNN2', 'ATP6V1E1', 'SCN3B', 'SCN2A', 'ATP6V1D', 'SCN4B', 'HCN1']	0.0175065	0	0
173	174	Cellular Response To Organonitrogen Compound (GO:0071417)	0.00119036	3.23764	21.8007	['GABRB3', 'EGR1', 'GABRB2', 'GABRB1', 'DMTN', 'PDE2A', 'ATP2B4', 'PDXP', 'SLIT2', 'GABRG2', 'HCN1']	0.0175065	0	0
174	175	Regulation Of Axon Extension (GO:0030516)	0.00127247	5.70253	38.0176	['ZFYVE27', 'CDKL5', 'MAP2', 'TWF2', 'L1CAM', 'KIAA0319']	0.0186052	0	0
175	176	Cellular Response To Oxygen-Containing Compound (GO:1901701)	0.00127997	1.98758	13.2391	['CAMK2D', 'PID1', 'GUCY1B1', 'CPNE6', 'TWF2', 'PDXP', 'PPM1E', 'CAMKK2', 'NRIP1', 'PTK2B', 'SLIT2', 'PDK2', 'GIT1', 'SYT5', 'EGR1', 'SYT4', 'DMTN', 'SYT1', 'TESC', 'PDE2A', 'ATP2B4', 'LDOC1', 'SYT17', 'DLG4', 'ITPKA', 'LGMN', 'HCN1']	0.0186052	0	0
176	177	Positive Regulation Of Cell Growth (GO:0030307)	0.00128688	3.2034	21.3203	['SYT4', 'ZFYVE27', 'CDKL5', 'UNC13A', 'SYT1', 'CPNE6', 'TWF2', 'NEDD4L', 'RASAL1', 'L1CAM', 'SYT17']	0.0186052	0	0
177	178	Intermediate Filament Bundle Assembly (GO:0045110)	0.00137254	20.61	135.843	['PKP2', 'NEFL', 'NEFM']	0.0195129	0	0
178	179	Neurotransmitter Receptor Diffusion Trapping (GO:0099628)	0.00137254	20.61	135.843	['CACNG8', 'DLG4', 'CACNG3']	0.0195129	0	0
179	180	Postsynaptic Neurotransmitter Receptor Diffusion Trapping (GO:0098970)	0.00137254	20.61	135.843	['CACNG8', 'DLG4', 'CACNG3']	0.0195129	0	0
180	181	Monoatomic Ion Transport (GO:0006811)	0.00138973	3.16986	20.8534	['CHRNB2', 'GABRB1', 'SLC24A3', 'SLC12A5', 'SLC9A6', 'GLRB', 'VDAC1', 'SLC17A7', 'SLC8A1', 'SLC8A2', 'GRIN1']	0.0196482	0	0
181	182	Negative Regulation Of Synaptic Transmission (GO:0050805)	0.00153147	10.0034	64.8371	['PRRT1', 'PLK2', 'SHANK2', 'HCN1']	0.0215331	0	0
182	183	Negative Regulation Of Response To Wounding (GO:1903035)	0.00158526	6.88393	44.3807	['EPHA4', 'RTN4RL1', 'OCRL', 'EXTL3', 'GIT1']	0.0221677	0	0
183	184	Calcium Ion Import Across Plasma Membrane (GO:0098703)	0.00171697	5.33407	33.9631	['CACNA2D1', 'SCN8A', 'SCN2A', 'CACNA1E', 'SLC8A1', 'SLC8A2']	0.0237499	0	0
184	185	Positive Regulation Of Exocytosis (GO:0045921)	0.00171697	5.33407	33.9631	['SMPD3', 'CADPS2', 'RAB3A', 'RAB15', 'CADPS', 'STXBP5']	0.0237499	0	0
185	186	Cell Chemotaxis (GO:0060326)	0.00175325	4.49004	28.4951	['NELL1', 'DOCK4', 'EGR3', 'ENC1', 'KIT', 'CCN3', 'CX3CL1']	0.0238647	0	0
186	187	Negative Regulation Of Cell Projection Organization (GO:0031345)	0.00175325	4.49004	28.4951	['EPHA4', 'PRNP', 'BAG5', 'RTN4RL1', 'STMN2', 'RTN4RL2', 'GRIN2B']	0.0238647	0	0
187	188	Plasma Membrane Bounded Cell Projection Morphogenesis (GO:0120039)	0.00175325	4.49004	28.4951	['CNTNAP2', 'NCKAP1', 'GPM6A', 'PAK1', 'SLC9A6', 'MINK1', 'WASF1']	0.0238647	0	0
188	189	Dendritic Spine Organization (GO:0097061)	0.00190644	6.55578	41.0557	['PRNP', 'DLG4', 'WASL', 'PAK3', 'LGMN']	0.0258126	0	0
189	190	Positive Regulation Of Actin Filament Bundle Assembly (GO:0032233)	0.00197148	4.38776	27.3312	['NELL1', 'PAK1', 'CCN2', 'SYNPO', 'PPM1E', 'CX3CL1', 'PFN2']	0.0261895	0	0
190	191	Positive Regulation Of Cation Channel Activity (GO:2001259)	0.00197906	5.16711	32.166	['PPP3CA', 'PPP3CB', 'PPP3R1', 'ANTKMT', 'CALM3', 'AKAP5']	0.0261895	0	0
191	192	Cell Communication By Electrical Coupling Involved In Cardiac Conduction (GO:0086064)	0.00198545	9.16928	57.0504	['FKBP1B', 'PKP2', 'ATP1A3', 'SLC8A1']	0.0261895	0	0
192	193	Endoplasmic Reticulum Tubular Network Organization (GO:0071786)	0.00198545	9.16928	57.0504	['REEP1', 'RTN1', 'ZFYVE27', 'ATL1']	0.0261895	0	0
193	194	Neuron Projection Organization (GO:0106027)	0.00198545	9.16928	57.0504	['PRNP', 'MAP1A', 'ATP1A3', 'LGMN']	0.0261895	0	0
194	195	Regulation Of Dendritic Spine Maintenance (GO:1902950)	0.00213866	16.4872	101.356	['PRNP', 'HOMER1', 'GRIN2B']	0.0279226	0	0
195	196	Positive Regulation Of Calcium Ion Import Across Plasma Membrane (GO:1905665)	0.00213866	16.4872	101.356	['PPP3CA', 'PPP3CB', 'PPP3R1']	0.0279226	0	0
196	197	Regulation Of Protein Tyrosine Kinase Activity (GO:0061097)	0.00227029	5.01027	30.5018	['EPHA4', 'PRNP', 'DLG3', 'DLG4', 'NCK2', 'THY1']	0.0292255	0	0
197	198	Neuron Projection Extension (GO:1990138)	0.00227029	5.01027	30.5018	['NELL2', 'NELL1', 'PPP3CB', 'SLC9A6', 'ULK1', 'SH3GL2']	0.0292255	0	0
198	199	Regulation Of Microtubule Polymerization Or Depolymerization (GO:0031110)	0.00227272	6.25747	38.0878	['MAP2', 'MAP1A', 'STMN2', 'STMN3', 'MAPRE3']	0.0292255	0	0
199	200	Membrane Organization (GO:0061024)	0.00241916	2.53481	15.2706	['RTP5', 'PRKCI', 'AZIN2', 'OCRL', 'WASL', 'SYP', 'NUP93', 'REEP1', 'SYNGR1', 'SYNJ1', 'CHMP1A', 'AAK1', 'PIP5K1C', 'VAMP2']	0.0309532	0	0
200	201	Ventricular Cardiac Muscle Cell Action Potential (GO:0086005)	0.00252459	8.46351	50.626	['PKP2', 'NEDD4L', 'GPD1L', 'SCN3B']	0.0321415	0	0
201	202	Regulation Of Cytosolic Calcium Ion Concentration (GO:0051480)	0.00259265	4.86266	28.9575	['TMEM178A', 'FKBP1B', 'ATP2B4', 'ATP2B2', 'ATP2B1', 'SLC8A2']	0.0326827	0	0
202	203	Regulation Of Microtubule Polymerization (GO:0031113)	0.00259265	4.86266	28.9575	['PAK1', 'MAP2', 'STMN2', 'TBCD', 'MAPRE3', 'CDK5R1']	0.0326827	0	0
203	204	Regulation Of Dendrite Development (GO:0050773)	0.00294816	4.72348	27.5217	['CHRNB2', 'CDKL5', 'BCL11A', 'NEDD4L', 'KIAA0319', 'DBN1']	0.036982	0	0
204	205	Positive Regulation Of Cell Projection Organization (GO:0031346)	0.00303397	2.84236	16.4797	['PRKCI', 'NDRG4', 'CDKL5', 'DLG4', 'STMN2', 'TWF2', 'NPTN', 'PTK2B', 'SERPINI1', 'SLIT2', 'CX3CL1']	0.0378729	0	0
205	206	Golgi Lumen Acidification (GO:0061795)	0.00312429	13.7386	79.2518	['ATP6AP2', 'ATP6V1H', 'ATP6V1D']	0.038099	0	0
206	207	Regulation Of Postsynaptic Neurotransmitter Receptor Activity (GO:0098962)	0.00312429	13.7386	79.2518	['DLGAP3', 'BEGAIN', 'DLGAP4']	0.038099	0	0
207	208	Synaptic Vesicle Fusion To Presynaptic Active Zone Membrane (GO:0031629)	0.00312429	13.7386	79.2518	['SNAP25', 'SNAP47', 'STX1A']	0.038099	0	0
208	209	Regulation Of Actin Filament Polymerization (GO:0030833)	0.00315087	3.56051	20.5088	['NCKAP1', 'NCK2', 'TWF2', 'PTK2B', 'SLIT2', 'PAK3', 'BAIAP2', 'PFN2']	0.038099	0	0
209	210	Regulation Of Monoatomic Ion Transmembrane Transport (GO:0034765)	0.00315471	5.73542	33.0295	['GRIN2A', 'NEDD4L', 'GRIN2B', 'KCNJ3', 'GRIN1']	0.038099	0	0
210	211	Regulation Of Nervous System Process (GO:0031644)	0.00315631	7.85857	45.2524	['DLGAP3', 'BEGAIN', 'SLC8A2', 'DLGAP4']	0.038099	0	0
211	212	Excitatory Postsynaptic Potential (GO:0060079)	0.00315631	7.85857	45.2524	['GRIN2A', 'MAPK8IP2', 'GRIN2B', 'GRIN1']	0.038099	0	0
212	213	Regulation Of Axonogenesis (GO:0050770)	0.00333886	4.59204	26.1844	['EPHA4', 'PAK1', 'CHN1', 'THY1', 'SLIT2', 'PAK3']	0.0401134	0	0
213	214	Synapse Assembly (GO:0007416)	0.00344386	3.50381	19.8707	['GABRB3', 'GABRB2', 'GPM6A', 'FARP1', 'GABRA1', 'GABRG2', 'SHANK2', 'ADGRL3']	0.0411814	0	0
214	215	Regulation Of Dendritic Spine Morphogenesis (GO:0061001)	0.00367755	5.50571	30.8623	['ARHGAP44', 'EPHA4', 'DBN1', 'LZTS3', 'CDK5R1']	0.0433679	0	0
215	216	Regulation Of Potassium Ion Transport (GO:0043266)	0.00367755	5.50571	30.8623	['DPP6', 'KCNIP4', 'PTK2B', 'KCNN2', 'KCNAB1']	0.0433679	0	0
216	217	Phospholipid Dephosphorylation (GO:0046839)	0.00367755	5.50571	30.8623	['PLPPR2', 'SYNJ1', 'PLPPR3', 'PLPPR4', 'OCRL']	0.0433679	0	0
217	218	Intracellular Calcium Ion Homeostasis (GO:0006874)	0.00378575	2.61349	14.5742	['CAMK2D', 'SLC24A3', 'TMEM178A', 'STIM2', 'FKBP1B', 'NPTN', 'ATP2B4', 'ATP2A2', 'ATP2B2', 'ATP2B1', 'SLC8A1', 'SLC8A2']	0.0444392	0	0
218	219	Positive Regulation Of Plasma Membrane Bounded Cell Projection Assembly (GO:0120034)	0.00381767	3.14535	17.5137	['NCKAP1', 'RIPOR2', 'GPM6A', 'NELL1', 'TENM2', 'ARPC2', 'FSCN1', 'TWF2', 'WASL']	0.0446092	0	0
219	220	Arp2/3 Complex-Mediated Actin Nucleation (GO:0034314)	0.00388777	7.33428	40.7047	['ARPC2', 'ARPC1A', 'WIPF3', 'ARPC5L']	0.0448144	0	0
220	221	Negative Regulation Of Peptidyl-Serine Phosphorylation (GO:0033137)	0.00388777	7.33428	40.7047	['DMTN', 'NCK2', 'DMD', 'GPD1L']	0.0448144	0	0
221	222	Positive Regulation Of Axon Extension (GO:0045773)	0.00388777	7.33428	40.7047	['NELL1', 'ZFYVE27', 'TWF2', 'L1CAM']	0.0448144	0	0
222	223	Regulation Of Neuron Apoptotic Process (GO:0043523)	0.0039533	2.90799	16.0905	['PRKCG', 'EGR1', 'PRNP', 'PRKCI', 'LIG4', 'VSTM2L', 'PTK2B', 'FAIM2', 'LGMN', 'CDK5R1']	0.0453655	0	0
223	224	Sodium Ion Transport (GO:0006814)	0.00411782	3.10587	17.0588	['SLC4A8', 'SLC24A3', 'SCN8A', 'SCN3B', 'SCN2A', 'SCN4B', 'SLC8A1', 'SLC8A2', 'HCN1']	0.0470424	0	0
224	225	Regulation Of Long-Term Synaptic Potentiation (GO:1900271)	0.00425967	5.29368	28.8959	['EPHA4', 'AKAP5', 'CYP46A1', 'SHISA7', 'LGMN']	0.0483653	0	0
225	226	calcineurin-NFAT Signaling Cascade (GO:0033173)	0.00434702	11.7753	64.0374	['PPP3CA', 'PPP3CB', 'PPP3R1']	0.0483653	0	0
226	227	Negative Regulation Of Lymphocyte Migration (GO:2000402)	0.00434702	11.7753	64.0374	['RIPOR2', 'WASL', 'CD200']	0.0483653	0	0
227	228	Neuron Projection Maintenance (GO:1990535)	0.00434702	11.7753	64.0374	['PRNP', 'MAP1A', 'ATP1A3']	0.0483653	0	0
228	229	Nucleoside Triphosphate Metabolic Process (GO:0009141)	0.00434702	11.7753	64.0374	['NME2', 'AK4', 'AK5']	0.0483653	0	0
229	230	Regulation Of Axon Regeneration (GO:0048679)	0.00434702	11.7753	64.0374	['EPHA4', 'RTN4RL1', 'OCRL']	0.0483653	0	0
230	231	Neuron Projection Guidance (GO:0097485)	0.00444057	2.6906	14.5749	['CYFIP2', 'EPHA5', 'NELL2', 'EPHA4', 'NELL1', 'EPHA6', 'ARHGEF25', 'SLIT2', 'L1CAM', 'KALRN', 'CDK5R1']	0.0490918	0	0
231	232	Negative Regulation Of Neuron Apoptotic Process (GO:0043524)	0.00445069	3.34403	18.1069	['PRKCG', 'PRKCI', 'LIG4', 'VSTM2L', 'PTK2B', 'CX3CL1', 'LGMN', 'ZPR1']	0.0490918	0	0

## Sheet: CA2_GO_result
Unnamed: 0	Rank	Term name	P-value	Z-score	Combined score	Overlapping genes	Adjusted p-value	Old p-value	Old adjusted p-value
0	1	Sodium Ion Transmembrane Transport (GO:0035725)	3.03687e-07	14.0583	210.977	['SLC4A8', 'SLC24A3', 'SLC9A6', 'ATP1A3', 'ATP1A1', 'ATP1B1', 'SCN2A', 'SLC8A1']	0.000367461	0	0
1	2	Inorganic Cation Import Across Plasma Membrane (GO:0098659)	1.75797e-06	10.9391	144.957	['KCNJ6', 'SLC9A6', 'ATP1A3', 'ATP1A1', 'ATP1B1', 'SCN2A', 'SLC8A1', 'SCN1A']	0.000768313	0	0
2	3	Proton Transmembrane Transport (GO:1902600)	2.51085e-06	17.9375	231.302	['ATP6V1A', 'ATP6V1B2', 'ATP1A3', 'ATP1A1', 'ATP1B1', 'ATP6V0E2']	0.000768313	0	0
3	4	Monoatomic Cation Transmembrane Transport (GO:0098655)	2.8458e-06	5.89903	75.3286	['ATP6V1A', 'SLC4A8', 'SLC24A3', 'SLC9A6', 'ATP6V1B2', 'ATP1A3', 'KCNQ5', 'ATP1A1', 'ATP1B1', 'SCN2A', 'ATP6V0E2', 'SLC8A1']	0.000768313	0	0
4	5	Inorganic Cation Transmembrane Transport (GO:0098662)	3.17485e-06	5.83307	73.8481	['ATP6V1A', 'SLC4A8', 'SLC24A3', 'SLC9A6', 'ATP6V1B2', 'ATP1A3', 'KCNQ5', 'ATP1A1', 'ATP1B1', 'SCN2A', 'ATP6V0E2', 'SLC8A1']	0.000768313	0	0
5	6	Clathrin Coat Disassembly (GO:0072318)	9.87324e-06	126.35	1456.27	['HSPA8', 'SYNJ1', 'SH3GL2']	0.00184449	0	0
6	7	Intracellular Sodium Ion Homeostasis (GO:0006883)	1.10603e-05	36.3114	414.391	['ATP1A3', 'ATP1A1', 'ATP1B1', 'SLC8A1']	0.00184449	0	0
7	8	Regulation Of Secretion By Cell (GO:1903530)	1.2195e-05	13.2884	150.351	['NSF', 'RAB3C', 'RIMS1', 'SYT1', 'RAB26', 'SYN1']	0.00184449	0	0
8	9	Sodium Ion Homeostasis (GO:0055078)	4.37704e-05	24.199	242.875	['ATP1A3', 'ATP1A1', 'ATP1B1', 'SLC8A1']	0.00588469	0	0
9	10	Neurotransmitter Transport (GO:0006836)	5.90482e-05	13.5848	132.277	['SYT1', 'SYNJ1', 'LIN7A', 'SLC17A7', 'SYN1']	0.0064688	0	0
10	11	Regulation Of Exocytosis (GO:0017157)	7.09334e-05	13.029	124.476	['NSF', 'RAB3C', 'CADPS2', 'SYT1', 'RAB26']	0.0064688	0	0
11	12	Cardiac Muscle Cell Action Potential (GO:0086001)	8.01593e-05	20.3231	191.677	['ATP1A1', 'ATP1B1', 'SLC8A1', 'SCN1A']	0.0064688	0	0
12	13	Response To Steroid Hormone (GO:0048545)	8.01593e-05	20.3231	191.677	['HSPA8', 'TGFB2', 'ATP1A3', 'ATP1A1']	0.0064688	0	0
13	14	Vacuolar Acidification (GO:0007035)	8.01593e-05	20.3231	191.677	['ATP6V1A', 'DMXL2', 'ATP6V1B2', 'ATP6V0E2']	0.0064688	0	0
14	15	Sodium Ion Transport (GO:0006814)	8.01918e-05	9.27414	87.4652	['SLC4A8', 'SLC24A3', 'ATP1B1', 'SCN2A', 'SLC8A1', 'SCN1A']	0.0064688	0	0
15	16	Relaxation Of Cardiac Muscle (GO:0055119)	0.000104834	42.104	385.805	['CHGA', 'ATP1B1', 'SLC8A1']	0.00746174	0	0
16	17	Sodium Ion Export Across Plasma Membrane (GO:0036376)	0.000104834	42.104	385.805	['ATP1A3', 'ATP1A1', 'ATP1B1']	0.00746174	0	0
17	18	Potassium Ion Transmembrane Transport (GO:0071805)	0.000118472	6.93665	62.7131	['KCNJ6', 'SLC24A3', 'SLC9A6', 'ATP1A3', 'KCNQ5', 'ATP1A1', 'ATP1B1']	0.00758605	0	0
18	19	Intracellular pH Reduction (GO:0051452)	0.00011912	18.1429	163.928	['ATP6V1A', 'DMXL2', 'ATP6V1B2', 'ATP6V0E2']	0.00758605	0	0
19	20	Intracellular Potassium Ion Homeostasis (GO:0030007)	0.000135485	37.8917	337.488	['ATP1A3', 'ATP1A1', 'ATP1B1']	0.00819684	0	0
20	21	Neuron Projection Development (GO:0031175)	0.000160422	5.62243	49.1271	['NEUROD2', 'SLC9A6', 'NEUROD6', 'STMN2', 'NMNAT2', 'WASL', 'SH3GL2', 'UHMK1']	0.00924336	0	0
21	22	Regulation Of Regulated Secretory Pathway (GO:1903305)	0.00017024	16.3846	142.191	['RIMS1', 'SYT1', 'RAB15', 'SYN1']	0.0093632	0	0
22	23	Regulation Of Sodium Ion Transmembrane Transporter Activity (GO:2000649)	0.000212082	15.3901	130.177	['NETO1', 'PRKCE', 'GLRX', 'YWHAH']	0.0106925	0	0
23	24	Positive Regulation Of Signaling (GO:0023056)	0.000212082	15.3901	130.177	['NSF', 'RIMS1', 'CLSTN2', 'SYT1']	0.0106925	0	0
24	25	Monoatomic Ion Transport (GO:0006811)	0.00022162	7.61438	64.0715	['SLC24A3', 'SLC9A6', 'VDAC1', 'SLC17A7', 'SLC25A22', 'SLC8A1']	0.0107264	0	0
25	26	Signal Release From Synapse (GO:0099643)	0.000235564	14.9367	124.774	['RIMS1', 'SYT1', 'LIN7A', 'SYN1']	0.0109628	0	0
26	27	Cell Communication By Electrical Coupling Involved In Cardiac Conduction (GO:0086064)	0.000260646	29.1431	240.499	['ATP1A3', 'ATP1B1', 'SLC8A1']	0.0116808	0	0
27	28	Synaptic Vesicle Endocytosis (GO:0048488)	0.000288051	14.1054	114.993	['SYT1', 'SYNJ1', 'SH3GL2', 'SNAP91']	0.0124479	0	0
28	29	Positive Regulation Of Dendrite Extension (GO:1903861)	0.000314644	27.0601	218.214	['RNF157', 'RIMS1', 'SYT1']	0.0128499	0	0
29	30	Regulation Of Neurotransmitter Receptor Activity (GO:0099601)	0.000348437	13.3617	106.386	['CACNG8', 'LYNX1', 'NETO1', 'SHISA6']	0.0128499	0	0
30	31	Potassium Ion Import Across Plasma Membrane (GO:1990573)	0.000348437	13.3617	106.386	['KCNJ6', 'ATP1A3', 'ATP1A1', 'ATP1B1']	0.0128499	0	0
31	32	Regulation Of Dendrite Extension (GO:1903859)	0.000375362	25.2548	199.2	['RNF157', 'RIMS1', 'SYT1']	0.0128499	0	0
32	33	Regulation Of Synaptic Vesicle Exocytosis (GO:2000300)	0.000375362	25.2548	199.2	['RIMS1', 'SLC4A8', 'SYN1']	0.0128499	0	0
33	34	Positive Regulation Of G Protein-Coupled Receptor Signaling Pathway (GO:0045745)	0.000375362	25.2548	199.2	['CHGA', 'NECAB2', 'PRKCA']	0.0128499	0	0
34	35	Neurotransmitter Secretion (GO:0007269)	0.000381798	13.0184	102.463	['RIMS1', 'SYT1', 'LIN7A', 'SYN1']	0.0128499	0	0
35	36	Positive Regulation Of Synaptic Transmission (GO:0050806)	0.000382312	8.85663	69.6953	['RIMS1', 'CACNG8', 'CLSTN2', 'RGS14', 'SYT1']	0.0128499	0	0
36	37	Potassium Ion Transport (GO:0006813)	0.000449312	6.62472	51.062	['KCNJ6', 'SLC24A3', 'SLC9A6', 'KCNQ5', 'KCNAB1', 'SLC17A7']	0.0146572	0	0
37	38	Metal Ion Transport (GO:0030001)	0.000460307	5.48908	42.176	['KCNJ6', 'CACNG8', 'ITPR1', 'KCNAB1', 'SLC17A7', 'SCN2A', 'SCN1A']	0.0146572	0	0
38	39	Protein-Containing Complex Organization (GO:0043933)	0.000533332	6.4026	48.2523	['RIMS1', 'CAPZA2', 'LIN7A', 'WASL', 'KIFAP3', 'WASF1']	0.016547	0	0
39	40	Cellular Response To Nerve Growth Factor Stimulus (GO:1990090)	0.000601122	21.0425	156.066	['STMN2', 'WASF1', 'SH3GL2']	0.0180355	0	0
40	41	Dendrite Extension (GO:0097484)	0.000626024	83.7004	617.385	['SLC9A6', 'SH3GL2']	0.0180355	0	0
41	42	Synaptic Vesicle Uncoating (GO:0016191)	0.000626024	83.7004	617.385	['SYNJ1', 'SH3GL2']	0.0180355	0	0
42	43	Negative Regulation Of G Protein-Coupled Receptor Signaling Pathway (GO:0045744)	0.000691965	19.934	145.039	['GRK3', 'RGS14', 'YWHAB']	0.0194716	0	0
43	44	Regulation Of Vesicle-Mediated Transport (GO:0060627)	0.000743769	7.58679	54.6536	['NSF', 'RAB3C', 'MAP2K1', 'SYT1', 'RAB26']	0.0204536	0	0
44	45	Potassium Ion Homeostasis (GO:0055075)	0.000791107	18.9363	135.245	['ATP1A3', 'ATP1A1', 'ATP1B1']	0.021272	0	0
45	46	Cellular Response To Steroid Hormone Stimulus (GO:0071383)	0.00101544	17.2131	118.64	['HSPA8', 'ATP1A3', 'ATP1A1']	0.0267104	0	0
46	47	Regulation Of Potassium Ion Transmembrane Transporter Activity (GO:1901016)	0.00114118	16.4639	111.554	['NETO1', 'KCNAB1', 'ATP1B1']	0.0293794	0	0
47	48	Neuron Development (GO:0048666)	0.00132365	5.329	35.3172	['EPHA5', 'TGFB2', 'STMN2', 'B4GALT6', 'SH3GL2', 'UHMK1']	0.033367	0	0
48	49	Positive Regulation Of Cell Communication (GO:0010647)	0.00174077	14.0219	89.0874	['RIMS1', 'CLSTN2', 'SYT1']	0.0429863	0	0

## Sheet: CA3_GO_result
Unnamed: 0	Rank	Term name	P-value	Z-score	Combined score	Overlapping genes	Adjusted p-value	Old p-value	Old adjusted p-value
0	1	Chemical Synaptic Transmission (GO:0007268)	1.05999e-13	5.76666	172.281	['NAPA', 'SNAP25', 'DOC2A', 'GRIK5', 'CACNA1B', 'CACNA1A', 'LIN7A', 'CPLX1', 'KIF5A', 'KCNMB4', 'KCNN1', 'SNCG', 'DLGAP1', 'SLC17A7', 'NPTX1', 'BSN', 'ERC2', 'SNCB', 'SNCA', 'GABRA2', 'SYT5', 'UNC13C', 'HOMER1', 'KCNIP2', 'NSG1', 'SYN2', 'SYN1', 'SHISA6', 'CACNB1', 'KCNQ2', 'AMPH', 'APBA2']	2.33727e-10	0	0
1	2	Anterograde Trans-Synaptic Signaling (GO:0098916)	7.40476e-11	5.87075	136.943	['SYT5', 'UNC13C', 'SNAP25', 'HOMER1', 'DOC2A', 'KCNIP2', 'CACNA1B', 'CACNA1A', 'SYN2', 'CPLX1', 'SYN1', 'CACNB1', 'KCNQ2', 'KIF5A', 'KCNMB4', 'KCNN1', 'SNCG', 'DLGAP1', 'AMPH', 'NPTX1', 'BSN', 'SNCB', 'APBA2', 'SNCA']	8.16375e-08	0	0
2	3	Synaptic Vesicle Exocytosis (GO:0016079)	1.21511e-10	17.3856	396.93	['SYT5', 'SNAP25', 'RIMS1', 'SYT4', 'UNC13C', 'STX1B', 'RAB3A', 'PCLO', 'CPLX1', 'SYT7', 'STX1A', 'SNCA']	8.93109e-08	0	0
3	4	Synaptic Vesicle Endocytosis (GO:0048488)	1.53391e-09	15.9025	322.748	['SYT5', 'SYNJ1', 'DNAJC6', 'AP2S1', 'SNCG', 'SNCB', 'SH3GL2', 'DNM1', 'SNAP91', 'STX1A', 'SNCA']	8.4557e-07	0	0
4	5	Neurotransmitter Secretion (GO:0007269)	3.57841e-09	14.4094	280.239	['SNAP25', 'RIMS1', 'RAB3A', 'PCLO', 'DOC2A', 'LIN7A', 'CPLX1', 'SYN2', 'SYN1', 'STX1A', 'SNCA']	1.57808e-06	0	0
5	6	Modulation Of Chemical Synaptic Transmission (GO:0050804)	5.55943e-09	6.78477	128.963	['CLSTN2', 'HOMER1', 'CLSTN3', 'GRIK5', 'CACNA1B', 'CACNA1A', 'MAPK8IP2', 'CPLX1', 'GRM1', 'SYN1', 'BAIAP3', 'RIMS1', 'SLC4A8', 'KCNMB4', 'DLGAP1', 'NPTX1', 'NPTXR']	2.04309e-06	0	0
6	7	Signal Release From Synapse (GO:0099643)	1.38033e-08	14.9418	270.421	['SNAP25', 'RIMS1', 'RAB3A', 'PCLO', 'LIN7A', 'CPLX1', 'SYN2', 'SYN1', 'STX1A', 'SNCA']	4.34804e-06	0	0
7	8	Regulation Of Neurotransmitter Receptor Activity (GO:0099601)	3.94517e-08	13.0714	222.843	['PRRT1', 'CACNG7', 'CACNG8', 'LYNX1', 'NETO1', 'DLGAP1', 'NPTX1', 'MAPK8IP2', 'NPTXR', 'SHISA6']	1.08739e-05	0	0
8	9	Synaptic Vesicle Recycling (GO:0036465)	6.37499e-08	12.3012	203.81	['SYT5', 'RAB3A', 'SYNJ1', 'AP2S1', 'SNCG', 'SNCB', 'DNM1', 'SYT7', 'STX1A', 'SNCA']	1.56187e-05	0	0
9	10	Vesicle-Mediated Transport In Synapse (GO:0099003)	1.04958e-07	26.4763	425.466	['SNAP25', 'RIMS1', 'RAB3A', 'PCLO', 'CPLX1', 'STX1A', 'SNCA']	2.31432e-05	0	0
10	11	Positive Regulation Of Regulated Secretory Pathway (GO:1903307)	1.44106e-07	41.5277	654.174	['SCAMP5', 'SLC4A8', 'SYT4', 'RAB3A', 'RAB3D', 'STX1A']	2.65104e-05	0	0
11	12	Regulation Of Catecholamine Secretion (GO:0050433)	1.44777e-07	17.5484	276.353	['PRKN', 'SYT5', 'SYT4', 'KCNA2', 'SYT13', 'SYT7', 'STX1A', 'SNCA']	2.65104e-05	0	0
12	13	Synaptic Vesicle Cycle (GO:0099504)	1.56297e-07	13.4188	210.293	['SNAP25', 'RIMS1', 'RAB3A', 'PCLO', 'SLC17A7', 'CPLX1', 'SYT7', 'STX1A', 'SNCA']	2.65104e-05	0	0
13	14	Regulation Of Calcium Ion-Dependent Exocytosis (GO:0017158)	1.9849e-07	16.6701	257.262	['SCAMP5', 'SYT5', 'SYT4', 'DOC2A', 'SYT13', 'SYT7', 'STX1A', 'BAIAP3']	3.12621e-05	0	0
14	15	Regulated Exocytosis (GO:0045055)	2.82818e-07	10.1973	153.76	['SNAP25', 'RIMS1', 'SYNGR1', 'RAB3A', 'PCLO', 'RAB26', 'SYT13', 'CPLX1', 'STX1A', 'SNCA']	4.15742e-05	0	0
15	16	Presynaptic Endocytosis (GO:0140238)	4.73142e-07	14.4935	211.081	['SYT5', 'SYNJ1', 'AP2S1', 'SNCG', 'SNCB', 'DNM1', 'STX1A', 'SNCA']	6.52049e-05	0	0
16	17	Regulation Of Dopamine Secretion (GO:0014059)	5.17862e-07	19.4119	280.96	['PRKN', 'SYT5', 'SYT4', 'KCNA2', 'SYT13', 'SYT7', 'SNCA']	6.71697e-05	0	0
17	18	Vesicle-Mediated Transport (GO:0016192)	6.95517e-07	3.12353	44.2873	['NAPA', 'SNAP25', 'RAB3A', 'DOC2A', 'AP2A1', 'AP2A2', 'CPLX1', 'NCALD', 'ACTR1A', 'KIF5A', 'AP2S1', 'AP1S1', 'ATP6V1H', 'SYT4', 'RAB4B', 'CADPS', 'NSG1', 'SYP', 'SYT7', 'DNM1', 'STX1B', 'EHD3', 'NSG2', 'CALY', 'OCIAD1', 'AMPH', 'ARF5', 'STX1A']	8.52009e-05	0	0
18	19	Regulation Of Regulated Secretory Pathway (GO:1903305)	1.29838e-06	12.3438	167.312	['SYT5', 'RIMS1', 'SYT4', 'RAB3A', 'RAB3D', 'SYT13', 'SYN1', 'SYT7']	0.00015068	0	0
19	20	Positive Regulation Of Developmental Growth (GO:0048639)	2.39228e-06	9.15794	118.534	['RNF157', 'RIMS1', 'SYT4', 'BDNF', 'CPNE6', 'LIMK1', 'TWF2', 'MAPT', 'L1CAM']	0.000263748	0	0
20	21	Regulation Of Macroautophagy (GO:0016241)	2.939e-06	5.98522	76.2364	['ATP6V1A', 'UCHL1', 'ATP6V0B', 'ATP6V1G2', 'ATP6V1B2', 'ATP6V1H', 'IKBKG', 'ATP6V1E1', 'PRKACA', 'ATP6V0D1', 'ATP6V0E2', 'CDK5R1']	0.000308595	0	0
21	22	Axon Development (GO:0061564)	4.07776e-06	5.77794	71.7041	['NEUROD2', 'GAP43', 'RAB3A', 'NEUROD6', 'RTN4RL1', 'AMIGO1', 'RTN4RL2', 'CCK', 'MAPT', 'L1CAM', 'NEFH', 'CDK5R1']	0.000400241	0	0
22	23	Monoatomic Cation Transmembrane Transport (GO:0098655)	4.17485e-06	3.41964	42.3572	['ATP6V1A', 'ATP6V0B', 'SLC24A3', 'SLC6A17', 'ABCC8', 'KCNA2', 'CACNA1A', 'ATP1A3', 'PKD1', 'CACNB1', 'SLC4A8', 'KCNQ2', 'ATP6V1B2', 'KCNN1', 'ATP6V1H', 'KCNQ5', 'ATP6V1E1', 'ATP6V0D1', 'SCN3B', 'ATP6V0E2', 'SCN1B']	0.000400241	0	0
23	24	Inorganic Cation Transmembrane Transport (GO:0098662)	4.92677e-06	3.38011	41.3078	['ATP6V1A', 'ATP6V0B', 'SLC24A3', 'SLC6A17', 'ABCC8', 'KCNA2', 'CACNA1A', 'ATP1A3', 'PKD1', 'CACNB1', 'SLC4A8', 'KCNQ2', 'ATP6V1B2', 'KCNN1', 'ATP6V1H', 'KCNQ5', 'ATP6V1E1', 'ATP6V0D1', 'SCN3B', 'ATP6V0E2', 'SCN1B']	0.000452647	0	0
24	25	Regulation Of Monoatomic Ion Transmembrane Transporter Activity (GO:0032412)	5.13331e-06	7.07973	86.2294	['YWHAE', 'PRRT1', 'CACNG7', 'CACNG8', 'HOMER1', 'MAPK8IP2', 'SCN3B', 'SCN1B', 'YWHAH', 'SHISA6']	0.000452758	0	0
25	26	Regulation Of Neuron Death (GO:1901214)	8.59092e-06	7.65962	89.3479	['PRKN', 'CHGA', 'SNCG', 'FAIM2', 'DHCR24', 'IKBKG', 'MAPT', 'SNCB', 'SNCA']	0.000728576	0	0
26	27	Calcium Ion-Regulated Exocytosis Of Neurotransmitter (GO:0048791)	1.25333e-05	23.0184	259.812	['SYT5', 'SYT4', 'UNC13C', 'RIMS1', 'SYT7']	0.00100458	0	0
27	28	Inner Mitochondrial Membrane Organization (GO:0007007)	1.27566e-05	10.7778	121.46	['TIMM8B', 'TOMM70', 'UQCC3', 'CHCHD6', 'IMMT', 'GHITM', 'MICOS13']	0.00100458	0	0
28	29	Axon Guidance (GO:0007411)	1.34141e-05	4.35219	48.8281	['EPHA4', 'UNC5A', 'ARHGEF25', 'BDNF', 'NRXN3', 'L1CAM', 'NELL2', 'GAP43', 'KIF5A', 'SLIT1', 'RAC1', 'SCN1B', 'PLXNA4', 'CDK5R1']	0.00101994	0	0
29	30	Neuron Projection Development (GO:0031175)	1.52178e-05	3.82372	42.4167	['EPHA4', 'CNTNAP1', 'UNC5A', 'BDNF', 'STMN2', 'STMN3', 'L1CAM', 'BMP7', 'NEUROD2', 'NEUROD6', 'TBC1D24', 'MAPT', 'NBL1', 'NEFH', 'SH3GL2', 'CDK5R1']	0.00111851	0	0
30	31	Proton Transmembrane Transport (GO:1902600)	1.85787e-05	8.12299	88.4878	['ATP6V1A', 'ATP6V0B', 'ATP6V1B2', 'ATP1A3', 'ATP6V1H', 'ATP6V1E1', 'ATP6V0D1', 'ATP6V0E2']	0.00132148	0	0
31	32	Regulation Of Secretion By Cell (GO:1903530)	1.95837e-05	6.82192	73.9551	['RAB3C', 'RIMS1', 'RAB3A', 'RAB26', 'RAB3D', 'SCG5', 'KCNMB4', 'CPLX1', 'SYN1']	0.00134944	0	0
32	33	Calcium-Ion Regulated Exocytosis (GO:0017156)	2.70432e-05	12.4494	130.943	['SYT5', 'RIMS1', 'SYT4', 'RAB3A', 'SYT13', 'SYT7']	0.00180698	0	0
33	34	Clathrin-Dependent Endocytosis (GO:0072583)	3.4075e-05	11.8559	121.961	['DNAJC6', 'CLTB', 'AP2S1', 'CLTA', 'AP2A2', 'SNAP91']	0.00220986	0	0
34	35	Exocytosis (GO:0006887)	3.72838e-05	5.4913	55.9945	['SNAP25', 'RIMS1', 'STX1B', 'SYNGR1', 'RAB3A', 'DOC2A', 'RAB26', 'CADPS', 'CPLX1', 'STX1A']	0.00234888	0	0
35	36	Vacuolar Acidification (GO:0007035)	5.25192e-05	10.8239	106.662	['ATP6V1A', 'ATP6V0B', 'ATP6V1B2', 'ATP6V1H', 'ATP6V0E2', 'ATP6V0D1']	0.0032168	0	0
36	37	Positive Regulation Of Axon Extension (GO:0045773)	6.59662e-05	14.7938	142.41	['LIMK1', 'TWF2', 'MAPT', 'L1CAM', 'MEGF8']	0.00393123	0	0
37	38	Intracellular pH Reduction (GO:0051452)	9.43126e-05	9.57349	88.7356	['ATP6V1A', 'ATP6V0B', 'ATP6V1B2', 'ATP6V1H', 'ATP6V0E2', 'ATP6V0D1']	0.00547261	0	0
38	39	Regulation Of Neuron Differentiation (GO:0045664)	0.000106826	5.35595	48.9765	['NEUROD2', 'MMD', 'BDNF', 'NBL1', 'BMP7', 'YWHAG', 'YWHAH', 'CDK5R1', 'FGFR1']	0.00603978	0	0
39	40	Nervous System Development (GO:0007399)	0.000122094	2.48155	22.3606	['PRKN', 'NRSN2', 'NUMBL', 'DOC2A', 'BDNF', 'ROGDI', 'LIMK1', 'STMN3', 'L1CAM', 'PKD1', 'NRGN', 'OLFM1', 'NEUROD2', 'SCN8A', 'SPOCK2', 'KCNQ2', 'ENC1', 'ADORA1', 'SPOCK1', 'NPTX1', 'NBL1', 'APBA2', 'ITM2B', 'SH3GL2']	0.00673044	0	0
40	41	Presynaptic Active Zone Organization (GO:1990709)	0.00012927	61.9091	554.31	['PCLO', 'RAB3A', 'ERC2']	0.00695222	0	0
41	42	Cristae Formation (GO:0042407)	0.000134735	20.6737	184.248	['UQCC3', 'CHCHD6', 'IMMT', 'MICOS13']	0.00707361	0	0
42	43	Negative Regulation Of Cell Projection Organization (GO:0031345)	0.000170585	6.76189	58.668	['EPHA4', 'STX1B', 'RTN4RL1', 'STMN2', 'SPOCK1', 'RTN4RL2', 'YWHAH']	0.00874744	0	0
43	44	Regulation Of Short-Term Neuronal Synaptic Plasticity (GO:0048172)	0.000190966	18.3757	157.359	['SYNGR1', 'RAB3A', 'SYP', 'SHISA6']	0.00915391	0	0
44	45	Clathrin Coat Assembly (GO:0048268)	0.000190966	18.3757	157.359	['CALY', 'NSG2', 'CLTA', 'NSG1']	0.00915391	0	0
45	46	Membrane Depolarization (GO:0051899)	0.000190966	18.3757	157.359	['ATP5IF1', 'SCN3B', 'SCN1B', 'YWHAH']	0.00915391	0	0
46	47	Regulation Of AMPA Receptor Activity (GO:2000311)	0.000218566	10.8979	91.8518	['PRRT1', 'CACNG7', 'CACNG8', 'MAPK8IP2', 'SHISA6']	0.00969537	0	0
47	48	Regulation Of Sodium Ion Transmembrane Transporter Activity (GO:2000649)	0.0002188	8.02732	67.649	['NETO1', 'PRKCE', 'GLRX', 'SCN3B', 'SCN1B', 'YWHAH']	0.00969537	0	0
48	49	Neurotransmitter Transport (GO:0006836)	0.000219324	6.4607	54.4311	['GABRA2', 'SNAP25', 'SYNJ1', 'LIN7A', 'SLC17A7', 'SYN2', 'SYN1']	0.00969537	0	0
49	50	Response To Calcium Ion (GO:0051592)	0.00021985	4.34281	36.5776	['SYT5', 'NEUROD2', 'SYT4', 'HOMER1', 'KCNIP2', 'CPNE6', 'CACNA1A', 'KCNMB4', 'SYT13', 'SYT7']	0.00969537	0	0
50	51	Regulation Of Autophagy (GO:0010506)	0.000228401	2.98342	25.0142	['PRKN', 'ATP6V1A', 'ATP6V0B', 'ATP6V1G2', 'UCHL1', 'RRAGB', 'EEF1A2', 'ATP6V1B2', 'ATP6V1H', 'PIP4K2C', 'MAPT', 'ATP6V1E1', 'PRKACA', 'ATP6V0D1', 'ATP6V0E2', 'CDK5R1']	0.00987498	0	0
51	52	Synaptic Vesicle Docking (GO:0016081)	0.000253966	41.2706	341.651	['SNAP25', 'STX1B', 'UNC13C']	0.0103985	0	0
52	53	Negative Regulation Of Neuron Projection Regeneration (GO:0070571)	0.000253966	41.2706	341.651	['EPHA4', 'RTN4RL1', 'THY1']	0.0103985	0	0
53	54	Positive Regulation Of Axonogenesis (GO:0050772)	0.000254656	7.77606	64.3516	['BDNF', 'LIMK1', 'TWF2', 'MAPT', 'L1CAM', 'PLXNA4']	0.0103985	0	0
54	55	Synaptic Vesicle Membrane Organization (GO:0048499)	0.000262339	16.5373	136.364	['SNAP25', 'SYNGR1', 'SYP', 'STX1A']	0.0105174	0	0
55	56	Regulation Of Exocytosis (GO:0017157)	0.000278709	6.18514	50.6275	['RAB3C', 'RAB3A', 'RAB26', 'RAB3D', 'CADPS', 'CPLX1', 'SNCA']	0.0106836	0	0
56	57	Negative Regulation Of Neuron Projection Development (GO:0010977)	0.000278709	6.18514	50.6275	['EPHA4', 'STX1B', 'RTN4RL1', 'STMN2', 'SPOCK1', 'RTN4RL2', 'THY1']	0.0106836	0	0
57	58	Regulation Of Neuron Projection Development (GO:0010975)	0.000281019	3.37683	27.6126	['EPHA4', 'NDRG4', 'BDNF', 'STMN2', 'TWF2', 'KNDC1', 'RTN4RL2', 'CX3CL1', 'STX1B', 'RTN4RL1', 'SPOCK1', 'SCN1B', 'CDK5R1']	0.0106836	0	0
58	59	Synapse Organization (GO:0050808)	0.000301723	3.82516	31.0068	['CACNB1', 'UNC13C', 'BDNF', 'SPOCK2', 'SNCG', 'ARHGAP39', 'MAPT', 'L1CAM', 'SNCB', 'CX3CL1', 'SNCA']	0.0112762	0	0
59	60	Regulation Of Actin Filament Bundle Assembly (GO:0032231)	0.000325248	9.85896	79.1766	['PRKN', 'LIMK1', 'RAC1', 'CX3CL1', 'PFN2']	0.0119529	0	0
60	61	Protein-Containing Complex Assembly (GO:0065003)	0.00035398	2.58535	20.5439	['TRAPPC2L', 'TRAPPC1', 'CLTA', 'LIN7A', 'NSG1', 'MAPK8IP2', 'COX7A1', 'CX3CL1', 'TMEM70', 'HOPX', 'ADD2', 'RIMS1', 'EID2', 'CALY', 'NSG2', 'AP2S1', 'IKBKG', 'MAPT', 'SNCA']	0.0127955	0	0
61	62	Positive Regulation Of Supramolecular Fiber Organization (GO:1902905)	0.000471664	4.30562	32.9778	['PRKCE', 'LIMK1', 'STMN2', 'PDXP', 'RAC1', 'MAPT', 'CX3CL1', 'PFN2', 'CDK5R1']	0.0167745	0	0
62	63	Positive Regulation Of Dendrite Extension (GO:1903861)	0.000589366	12.719	94.5846	['RNF157', 'SYT4', 'RIMS1', 'CPNE6']	0.0203262	0	0
63	64	Axonogenesis (GO:0007409)	0.000589967	3.10444	23.0829	['EPHA4', 'RAB3A', 'ARHGEF25', 'BDNF', 'NRXN3', 'CCK', 'L1CAM', 'NELL2', 'KIF5A', 'SLIT1', 'NEFH', 'SCN1B', 'CDK5R1']	0.0203262	0	0
64	65	Potassium Ion Transport (GO:0006813)	0.00067932	3.71934	27.1305	['KCNJ6', 'SLC24A3', 'ABCC8', 'KCNIP2', 'KCNQ2', 'KCNA2', 'KCNMB4', 'KCNN1', 'KCNQ5', 'SLC17A7']	0.0225833	0	0
65	66	Receptor-Mediated Endocytosis (GO:0006898)	0.00067932	3.71934	27.1305	['DNAJC6', 'CLTB', 'AP2S1', 'AP1S1', 'CLTA', 'AP2A1', 'AP2A2', 'SNAP91', 'DNM1', 'SNCA']	0.0225833	0	0
66	67	Positive Regulation Of Calcium Ion-Dependent Exocytosis (GO:0045956)	0.000686206	24.7598	180.359	['SCAMP5', 'SYT4', 'STX1A']	0.0225833	0	0
67	68	Regulation Of Dendrite Extension (GO:1903859)	0.000743593	11.8099	85.0789	['RNF157', 'SYT4', 'RIMS1', 'CPNE6']	0.024104	0	0
68	69	Regulation Of Cell Differentiation (GO:0045595)	0.000754276	3.01742	21.6945	['PLEKHB2', 'BDNF', 'HOPX', 'TRPS1', 'SPOCK2', 'OCIAD1', 'DPF3', 'BRD9', 'PRKACA', 'YWHAG', 'CDK5R1', 'FGFR1', 'YWHAH']	0.024104	0	0
69	70	Neuron Projection Guidance (GO:0097485)	0.000771217	3.65372	26.1882	['NELL2', 'EPHA4', 'ARHGEF25', 'BDNF', 'KIF5A', 'NRXN3', 'SLIT1', 'L1CAM', 'SCN1B', 'CDK5R1']	0.0242933	0	0
70	71	Metal Ion Transport (GO:0030001)	0.000833177	3.1498	22.3329	['CACNG7', 'CACNG8', 'KCNJ6', 'NDFIP1', 'KCNIP2', 'SCN8A', 'KCNA2', 'KCNMB4', 'KCNN1', 'SLC17A7', 'SCN3B', 'PKD1']	0.0258754	0	0
71	72	Cellular Response To Catecholamine Stimulus (GO:0071870)	0.000924295	11.022	77.0052	['PRKN', 'GNG2', 'PRKACA', 'SNCA']	0.0282228	0	0
72	73	Regulation Of Endocytosis (GO:0030100)	0.000959675	4.92411	34.2172	['SCAMP5', 'RAB4B', 'CALY', 'AP2S1', 'PACSIN2', 'SYT7', 'SNCA']	0.0282228	0	0
73	74	Positive Regulation Of Cell Growth (GO:0030307)	0.000969923	3.85975	26.7801	['RNF157', 'RIMS1', 'SYT4', 'BDNF', 'CPNE6', 'LIMK1', 'TWF2', 'MAPT', 'L1CAM']	0.0282228	0	0
74	75	Golgi Lumen Acidification (GO:0061795)	0.00101116	20.6321	142.293	['ATP6V1A', 'ATP6V0B', 'ATP6V1H']	0.0282228	0	0
75	76	Axon Regeneration (GO:0031103)	0.00101116	20.6321	142.293	['GAP43', 'RTN4RL1', 'RTN4RL2']	0.0282228	0	0
76	77	Regulation Of Postsynaptic Neurotransmitter Receptor Activity (GO:0098962)	0.00101116	20.6321	142.293	['DLGAP1', 'NPTX1', 'NPTXR']	0.0282228	0	0
77	78	Motor Neuron Axon Guidance (GO:0008045)	0.00101116	20.6321	142.293	['EPHA4', 'SLIT1', 'RAC1']	0.0282228	0	0
78	79	Neuron Projection Regeneration (GO:0031102)	0.00101116	20.6321	142.293	['GAP43', 'RTN4RL1', 'RTN4RL2']	0.0282228	0	0
79	80	Regulation Of Neuronal Synaptic Plasticity (GO:0048168)	0.00117663	7.13632	48.1352	['SYNGR1', 'RAB3A', 'NETO1', 'SYP', 'SHISA6']	0.032431	0	0
80	81	Cellular Response To Calcium Ion (GO:0071277)	0.00125084	4.68512	31.3151	['SYT5', 'NEUROD2', 'SYT4', 'CPNE6', 'CACNA1A', 'SYT13', 'SYT7']	0.0340507	0	0
81	82	Regulation Of Vesicle-Mediated Transport (GO:0060627)	0.00127113	4.1032	27.3595	['RAB3C', 'RAB3A', 'RAB4B', 'RAB26', 'RAB3D', 'AP2S1', 'PACSIN2', 'CPLX1']	0.0341809	0	0
82	83	Regulation Of Axon Extension (GO:0030516)	0.00134624	6.89809	45.5994	['OLFM1', 'LIMK1', 'TWF2', 'MAPT', 'L1CAM']	0.0356555	0	0
83	84	Regulation Of Neurotransmitter Transport (GO:0051588)	0.00137447	9.72433	64.0802	['RIMS1', 'KCNMB4', 'CPLX1', 'SYN1']	0.0356555	0	0
84	85	Cellular Response To Nerve Growth Factor Stimulus (GO:1990090)	0.00137447	9.72433	64.0802	['BDNF', 'STMN2', 'MAPT', 'SH3GL2']	0.0356555	0	0
85	86	Regulation Of Long-Term Neuronal Synaptic Plasticity (GO:0048169)	0.00141907	17.6838	115.966	['SYNGR1', 'NETO1', 'SYP']	0.0359661	0	0
86	87	Regulation Of Phospholipase Activity (GO:0010517)	0.00141907	17.6838	115.966	['RASGRP1', 'FGFR1', 'SNCA']	0.0359661	0	0
87	88	Cellular Response To Metal Ion (GO:0071248)	0.00147784	3.3303	21.7041	['SYT5', 'PRKN', 'NEUROD2', 'SYT4', 'JUN', 'CPNE6', 'CACNA1A', 'SYT13', 'SYT7', 'SNCA']	0.0370299	0	0
88	89	Potassium Ion Transmembrane Transport (GO:0071805)	0.00165016	3.27752	20.9987	['KCNJ6', 'SLC24A3', 'ABCC8', 'KCNIP2', 'KCNQ2', 'KCNA2', 'KCNN1', 'ATP1A3', 'KCNQ5', 'GHITM']	0.0408831	0	0
89	90	Positive Regulation Of Exocytosis (GO:0045921)	0.00173858	6.4663	41.0913	['SMPD3', 'RAB3A', 'RAB3D', 'CADPS', 'SNCA']	0.0421271	0	0
90	91	Positive Regulation Of Signaling (GO:0023056)	0.00173858	6.4663	41.0913	['RIMS1', 'CLSTN2', 'HOMER1', 'CLSTN3', 'SNCA']	0.0421271	0	0
91	92	Cellular Response To Oxygen-Containing Compound (GO:1901701)	0.00185493	2.17458	13.6779	['SYT5', 'SYT4', 'JUN', 'GUCY1B1', 'IGFBP5', 'TESC', 'INSIG1', 'CPNE6', 'PDE2A', 'TWF2', 'CACNA1A', 'PDXP', 'LDOC1', 'SYT13', 'PPM1E', 'SYT7', 'NEUROD2', 'GNG2', 'RRAGB', 'MAPT']	0.0444578	0	0
92	93	Regulation Of Phospholipase C Activity (GO:1900274)	0.00191689	15.4725	96.8123	['KIT', 'RASGRP1', 'FGFR1']	0.0449655	0	0
93	94	Endosomal Lumen Acidification (GO:0048388)	0.00191689	15.4725	96.8123	['ATP6V1A', 'ATP6V0B', 'ATP6V1H']	0.0449655	0	0
94	95	Protein Localization To Cell Junction (GO:1902414)	0.00195855	8.69982	54.2482	['PCLO', 'KIF3A', 'BSN', 'NECTIN1']	0.0450972	0	0
95	96	Regulation Of Neurotransmitter Secretion (GO:0046928)	0.00196342	6.27003	39.0815	['RIMS1', 'STX1B', 'KCNMB4', 'CPLX1', 'SYN1']	0.0450972	0	0
96	97	Protein Localization To Cell Periphery (GO:1990778)	0.00215296	3.15256	19.3596	['RAB3C', 'EHD3', 'RAB3A', 'RAB3D', 'TESC', 'ZDHHC23', 'LIN7A', 'ZDHHC22', 'SCN3B', 'EFR3B']	0.0489411	0	0
97	98	Negative Regulation Of Transport (GO:0051051)	0.00220878	6.0853	37.2135	['PRKN', 'SCAMP5', 'NDFIP1', 'ARL6IP5', 'SNCA']	0.0496975	0	0

## Sheet: CA4_GO_result
Unnamed: 0	Rank	Term name	P-value	Z-score	Combined score	Overlapping genes	Adjusted p-value	Old p-value	Old adjusted p-value
0	1	Axonogenesis (GO:0007409)	4.7163e-08	7.92435	133.681	['SEMA5A', 'LGI1', 'EPHA7', 'AUTS2', 'BDNF', 'NRXN3', 'CCK', 'EFNB3', 'KIF5C', 'PARD3', 'KIF5A', 'SLIT1', 'SCN1B']	5.59354e-05	0	0
1	2	Axon Guidance (GO:0007411)	2.70637e-07	8.42742	127.444	['SEMA5A', 'LGI1', 'EPHA7', 'EFNB3', 'KIF5C', 'BDNF', 'KIF5A', 'NRXN3', 'SLIT1', 'SCN1B', 'PLXNA4']	0.000160488	0	0
2	3	Neuron Projection Guidance (GO:0097485)	4.21678e-07	9.23586	135.573	['SEMA5A', 'LGI1', 'EPHA7', 'EFNB3', 'KIF5C', 'BDNF', 'KIF5A', 'NRXN3', 'SLIT1', 'SCN1B']	0.000166703	0	0
3	4	Chemical Synaptic Transmission (GO:0007268)	3.32147e-06	5.3106	66.9937	['GABRQ', 'UNC13C', 'DTNA', 'KCNIP2', 'GAD1', 'NSG1', 'SYN2', 'SHISA6', 'CACNB4', 'KIF5A', 'NPTX1', 'SNCB', 'ERC2']	0.000984815	0	0
4	5	Anterograde Trans-Synaptic Signaling (GO:0098916)	2.91438e-05	5.54961	57.9561	['GABRQ', 'UNC13C', 'DTNA', 'CACNB4', 'KCNIP2', 'GAD1', 'KIF5A', 'NPTX1', 'SNCB', 'SYN2']	0.00533975	0	0
5	6	Modulation Of Chemical Synaptic Transmission (GO:0050804)	3.00947e-05	7.24656	75.4451	['LGI1', 'CLSTN2', 'NPTX1', 'NPTXR', 'BTBD9', 'DGKI', 'GRM1', 'SLC8A2']	0.00533975	0	0
6	7	Atrioventricular Valve Morphogenesis (GO:0003181)	3.15162e-05	27.3409	283.389	['OLFM1', 'SMAD4', 'SLIT1', 'AXIN2']	0.00533975	0	0
7	8	Lipid Phosphorylation (GO:0046834)	7.56806e-05	51.0232	484.159	['DGKG', 'DGKB', 'DGKI']	0.0112197	0	0
8	9	Positive Regulation Of Epithelial To Mesenchymal Transition (GO:0010718)	9.66071e-05	12.2526	113.274	['OLFM1', 'TIAM1', 'SMAD4', 'SMAD3', 'AXIN2']	0.0127307	0	0
9	10	Potassium Ion Transport (GO:0006813)	0.000208417	6.30737	53.4611	['KCNJ4', 'KCNJ6', 'KCNIP2', 'KCNA4', 'KCNN3', 'KCNK1', 'AQP1']	0.0247182	0	0

## Sheet: DG_GO_result
Unnamed: 0	Rank	Term name	P-value	Z-score	Combined score	Overlapping genes	Adjusted p-value	Old p-value	Old adjusted p-value
0	1	Chemical Synaptic Transmission (GO:0007268)	4.79426e-14	3.4813	106.767	['GABRB3', 'GABRB2', 'SNAP25', 'GABRB1', 'CHRM1', 'DOC2A', 'GRIK5', 'GRIK2', 'CDH8', 'DLGAP1', 'BSN', 'ERC2', 'CHRNB2', 'UNC13C', 'UNC13A', 'MINK1', 'SYN2', 'GABRG2', 'SYN1', 'CACNB1', 'CACNB2', 'CACNB3', 'CACNB4', 'AKAP9', 'KCNQ3', 'NAPA', 'GRIA1', 'GRIA2', 'NLGN1', 'STXBP1', 'NRXN1', 'CACNA1B', 'CACNA1A', 'LIN7A', 'LIN7C', 'CACNA1E', 'SDCBP', 'GRIN2A', 'MAPK1', 'NPTX1', 'SNCB', 'TSPOAP1', 'GRIA…	1.74415e-10	0	0
1	2	Anterograde Trans-Synaptic Signaling (GO:0098916)	6.5606e-11	3.50937	82.2855	['GABRB3', 'GRIA1', 'GABRB2', 'GRIA2', 'SNAP25', 'GABRB1', 'NLGN1', 'CHRM1', 'DOC2A', 'NRXN1', 'CACNA1B', 'CACNA1A', 'GRIK2', 'CACNA1E', 'SDCBP', 'GRIN2A', 'MAPK1', 'DLGAP1', 'NPTX1', 'BSN', 'SNCB', 'GABRQ', 'CHRNB2', 'SYT5', 'UNC13C', 'GABBR2', 'NLGN4X', 'SLC12A5', 'KCNIP2', 'GAD1', 'MINK1', 'GRIN2B', 'SYN2', 'SYN1', 'GRIN1', 'CACNB1', 'CACNB2', 'CACNB3', 'CACNB4', 'DLG3', 'GLRB', 'AKAP9', 'KCNQ…	1.19337e-07	0	0
2	3	Modulation Of Chemical Synaptic Transmission (GO:0050804)	2.07323e-10	4.38446	97.7593	['GRIA1', 'GRIA2', 'NLGN1', 'TRIO', 'CLSTN2', 'GRIK5', 'PLPPR4', 'CLSTN1', 'CACNA1B', 'LRRC4', 'CACNA1A', 'GRIK2', 'CPLX2', 'GRM1', 'SLC8A2', 'PPP3CA', 'CDH2', 'DLGAP1', 'NPTX1', 'GRIA3', 'GRIA4', 'CHRNB2', 'LGI1', 'UNC13A', 'NLGN4X', 'IQSEC2', 'BTBD9', 'SYN1', 'BCR', 'NRG3', 'AKAP9', 'NPTXR', 'DGKI']	2.51414e-07	0	0
3	4	Regulation Of Neuron Projection Development (GO:0010975)	4.42401e-10	3.5772	77.0487	['BRSK2', 'NLGN1', 'MYCBP2', 'CRMP1', 'KNDC1', 'CX3CL1', 'ADCY6', 'CAMSAP2', 'ARHGAP44', 'SIPA1L1', 'CDH2', 'NPTN', 'EP300', 'PTK2B', 'SPOCK1', 'CSMD3', 'CAMK2G', 'SCN1B', 'MARK2', 'LZTS3', 'PPFIA2', 'NDEL1', 'ZNF365', 'PRKCI', 'YTHDF1', 'CAMK1D', 'BDNF', 'NTRK3', 'PAQR3', 'RTN4RL2', 'CBFA2T2', 'SETX', 'STX1B', 'LRRC7', 'RTN4RL1', 'RUFY3', 'RAPGEF2', 'CAMK1', 'DBN1', 'CDK5R1']	4.02363e-07	0	0
4	5	Regulation Of Trans-Synaptic Signaling (GO:0099177)	3.02197e-09	9.49736	186.313	['GRIA1', 'GRIA2', 'NLGN1', 'NLGN4X', 'IQSEC2', 'GRIK5', 'CACNA1B', 'LRRC4', 'CACNA1A', 'GRIK2', 'BTBD9', 'BCR', 'PPP3CA', 'NRG3', 'GRIA3', 'GRIA4']	2.19879e-06	0	0
5	6	Neuron Projection Development (GO:0031175)	2.67687e-07	2.85172	43.1564	['NCKAP1', 'CNTNAP1', 'NLGN1', 'TRIO', 'STMN4', 'PPP1R9A', 'CAMSAP2', 'PQBP1', 'DOCK10', 'NEUROD2', 'ATCAY', 'ZFYVE27', 'SRGAP3', 'NCDN', 'SH3GL2', 'MARK2', 'ZNF365', 'LGI1', 'TOR1A', 'UNC5A', 'BDNF', 'MINK1', 'VPS13B', 'NMNAT2', 'MAPK8IP3', 'DCLK1', 'EHD1', 'SLC9A6', 'GPRIN1', 'MAP1B', 'RAPGEF2', 'ULK1', 'TNIK', 'NBL1', 'LRP12', 'GAS7', 'CDK5R1']	0.000160007	0	0
6	7	Regulation Of Alternative mRNA Splicing, Via Spliceosome (GO:0000381)	3.07875e-07	5.60482	84.0363	['DDX17', 'KHDRBS1', 'RBM25', 'RBFOX1', 'DDX5', 'RBFOX2', 'RBFOX3', 'CELF2', 'CELF3', 'CELF4', 'CELF6', 'THRAP3', 'NOVA1', 'RNPS1', 'RBM5', 'HNRNPA0', 'SRSF12']	0.000160007	0	0
7	8	mRNA Splice Site Recognition (GO:0006376)	7.55896e-07	8.35983	117.835	['SETX', 'PRPF39', 'CELF2', 'CELF3', 'CELF4', 'PSIP1', 'LUC7L', 'LUC7L3', 'CELF6', 'KHDC4', 'HNRNPC', 'SRSF12']	0.000343744	0	0
8	9	Neuron Projection Morphogenesis (GO:0048812)	8.67829e-07	3.08208	43.0174	['NCKAP1', 'SPTBN4', 'BRSK2', 'CNTNAP1', 'NLGN1', 'TRIO', 'NRN1', 'PLPPR4', 'CELSR2', 'DOCK10', 'BTBD3', 'SLITRK4', 'CPNE1', 'NRCAM', 'SRGAP3', 'ZNF365', 'BDNF', 'APLP1', 'MINK1', 'ANK3', 'EIF2AK4', 'BAIAP2', 'DCLK1', 'SLC9A6', 'MAP1B', 'PARD3', 'ADGRB1', 'TNIK', 'NBL1', 'GAS7']	0.000350796	0	0
9	10	Glutamate Receptor Signaling Pathway (GO:0007215)	1.14459e-06	7.00079	95.774	['GRIA2', 'KCNB1', 'GRIK2', 'GRIN2B', 'GRM1', 'GRIN1', 'GRIN2A', 'PTK2B', 'HOMER3', 'PLCB1', 'GRIA3', 'GRIA4', 'CDK5R1']	0.000416403	0	0
10	11	Synaptic Transmission, Glutamatergic (GO:0035249)	2.6496e-06	8.13733	104.492	['GRIA1', 'NAPA', 'GRIA2', 'UNC13C', 'GRIN2A', 'UNC13A', 'GRIK5', 'GRIK2', 'GRIN2B', 'GRIA3', 'GRIA4']	0.000876294	0	0
11	12	mRNA Splicing, Via Spliceosome (GO:0000398)	2.90013e-06	2.53769	32.3574	['DDX5', 'SF3B3', 'CELF4', 'PPWD1', 'SNU13', 'HTATSF1', 'RNPC3', 'PRPF19', 'ESS2', 'PQBP1', 'EFTUD2', 'SART3', 'ZMAT2', 'RBMX2', 'SNRNP70', 'MTREX', 'CTNNBL1', 'RBM5', 'SRSF12', 'DDX17', 'SRRM2', 'RBM14', 'NCBP2', 'METTL3', 'PRPF4B', 'CDC40', 'DNAJC17', 'NOVA1', 'PRPF3', 'RSRP1', 'PIN1', 'RBM42', 'RNPS1', 'HNRNPC', 'SNRPF', 'CACTIN', 'SRSF8']	0.000879223	0	0
12	13	Regulation Of Calcium Ion-Dependent Exocytosis (GO:0017158)	4.05533e-06	7.65825	95.0808	['RPH3A', 'SCAMP5', 'SYT5', 'SYT4', 'DOC2A', 'KCNB1', 'STXBP1', 'SYT13', 'SYT7', 'CBARP', 'SYT17']	0.00106021	0	0
13	14	mRNA Processing (GO:0006397)	4.07997e-06	2.49427	30.9524	['TCERG1', 'DDX5', 'SF3B3', 'CELF1', 'PPWD1', 'SNU13', 'HTATSF1', 'RNPC3', 'PRPF19', 'ESS2', 'EFTUD2', 'SART3', 'ZMAT2', 'RBMX2', 'SNRNP70', 'MTREX', 'CTNNBL1', 'RBM5', 'SRSF12', 'HNRNPA0', 'SRRM2', 'RBM14', 'CPSF6', 'NCBP2', 'METTL3', 'PRPF4B', 'FBXO11', 'CDC40', 'NOVA1', 'PRPF3', 'PIN1', 'RBM42', 'RNPS1', 'HNRNPC', 'SNRPF', 'CACTIN', 'SRSF8']	0.00106021	0	0
14	15	Calcium Ion Transmembrane Import Into Cytosol (GO:0097553)	4.56932e-06	3.76971	46.3529	['ERO1A', 'SLC24A2', 'RYR2', 'CACNA2D1', 'CACNA1B', 'ATP2B4', 'CACNA1A', 'JPH1', 'CACNA1E', 'GRIN2B', 'SLC8A2', 'CHERP', 'GRIN1', 'JPH4', 'CACNB3', 'GRIN2A', 'SCN8A', 'PLCB1', 'SCN2A', 'SCN1A']	0.00110821	0	0
15	16	Positive Regulation Of Synaptic Transmission (GO:0050806)	5.40968e-06	3.8885	47.1571	['SLC24A2', 'LGI1', 'NLGN1', 'CLSTN2', 'NRXN1', 'CLSTN1', 'GRIK2', 'AKAP5', 'EIF2AK4', 'PRKCZ', 'GRIN2B', 'SHISA7', 'SLC8A2', 'GRIN1', 'STX1B', 'GRIN2A', 'NPTN', 'PTK2B', 'CACNG3']	0.00123003	0	0
16	17	Gamma-Aminobutyric Acid Signaling Pathway (GO:0007214)	8.24589e-06	9.67429	113.245	['GABRB3', 'GABBR2', 'GABRA1', 'GABRB2', 'GABRB1', 'GABRA5', 'GABRA4', 'GABRG2', 'SHISA7']	0.00176462	0	0
17	18	RNA Splicing, Via Transesterification Reactions With Bulged Adenosine As Nucleophile (GO:0000377)	9.89819e-06	2.57558	29.6788	['DDX5', 'SF3B3', 'PPWD1', 'SNU13', 'HTATSF1', 'RNPC3', 'PRPF19', 'ESS2', 'EFTUD2', 'SART3', 'ZMAT2', 'RBMX2', 'SNRNP70', 'MTREX', 'CTNNBL1', 'RBM5', 'SRSF12', 'SRRM2', 'RBM14', 'NCBP2', 'METTL3', 'PRPF4B', 'CDC40', 'NOVA1', 'PRPF3', 'PIN1', 'RBM42', 'RNPS1', 'SNRPF', 'HNRNPC', 'CACTIN', 'SRSF8']	0.00200053	0	0
18	19	Nervous System Development (GO:0007399)	1.08825e-05	1.92773	22.0308	['SEMA5A', 'NCKAP1', 'NRSN2', 'CHRM1', 'DOC2A', 'MYT1L', 'ZMYND8', 'PKD1', 'RAPGEFL1', 'NRGN', 'CDH2', 'DPF1', 'ENC1', 'EP300', 'NRCAM', 'SH3GL2', 'RBFOX1', 'RBFOX2', 'RBFOX3', 'APLP1', 'VPS13B', 'PPP2R5D', 'HPCAL4', 'ALDH3A2', 'OLFM1', 'SCN8A', 'ADGRB1', 'TAGLN3', 'LY6H', 'NBL1', 'PRKN', 'IGSF8', 'NLGN1', 'NUMBL', 'PLPPR1', 'NRXN1', 'ADAM22', 'CRMP1', 'KALRN', 'ESS2', 'NEUROD2', 'DHX30', 'EFNB3'…	0.00208371	0	0
19	20	Modulation Of Excitatory Postsynaptic Potential (GO:0098815)	1.28345e-05	6.50845	73.3071	['STX1B', 'NLGN1', 'GRIN2A', 'NLGN4X', 'NETO1', 'NRXN1', 'PTK2B', 'PRKCZ', 'GRIN2B', 'SLC8A2', 'GRIN1']	0.00224217	0	0
20	21	Peptidyl-Serine Modification (GO:0018209)	1.33039e-05	2.62596	29.4829	['SMG1', 'GALNT13', 'PNCK', 'GALNT16', 'MAST4', 'MAST3', 'ROCK2', 'MAST1', 'PRKCZ', 'PKD1', 'CAMKV', 'AKT2', 'MAP3K20', 'MAPK1', 'RICTOR', 'PRKACB', 'STK32C', 'MARK2', 'PRKCI', 'CAMK1D', 'DMPK', 'PDPK1', 'PRKCE', 'LMTK2', 'MAPK14', 'MAPKAPK5', 'ULK1', 'CAMK1', 'MAP3K12', 'CDK5R1']	0.00224217	0	0
21	22	Peptidyl-Serine Phosphorylation (GO:0018105)	1.3559e-05	2.67546	29.9877	['GPI', 'SMG1', 'PNCK', 'MAST4', 'MAST3', 'ROCK2', 'MAST1', 'PRKCZ', 'PKD1', 'CAMKV', 'AKT2', 'MAP3K20', 'MAPK1', 'RICTOR', 'PRKACB', 'STK32C', 'MARK2', 'PRKCI', 'CAMK1D', 'DMPK', 'PDPK1', 'PRKCE', 'LMTK2', 'MAPK14', 'MAPKAPK5', 'ULK1', 'CAMK1', 'MAP3K12', 'CDK5R1']	0.00224217	0	0
22	23	Positive Regulation Of DNA-templated Transcription (GO:0045893)	1.55416e-05	1.51437	16.7671	['TCERG1', 'CCNT2', 'SMARCB1', 'CRTC3', 'MAML1', 'TRRAP', 'UBP1', 'ELK1', 'ETS2', 'DCAF6', 'ZMIZ1', 'EP300', 'EPC2', 'KAT7', 'BTRC', 'RNF111', 'DDX17', 'PCID2', 'MAP2K1', 'ZBTB38', 'LMO3', 'LMO2', 'MRTFB', 'MRTFA', 'RFX3', 'LMO7', 'GTF2F2', 'MED6', 'ILF3', 'GLYR1', 'INO80B', 'MEAF6', 'KMT2A', 'SEC14L2', 'NEUROD2', 'DDRGK1', 'EP400', 'TP53BP1', 'DMAP1', 'BPTF', 'ZBTB18', 'JUN', 'SMAD4', 'SMAD3', '…	0.00230366	0	0
23	24	Neurotransmitter Secretion (GO:0007269)	1.56713e-05	5.13168	56.7753	['SNAP25', 'UNC13A', 'DOC2A', 'NRXN1', 'STXBP1', 'LIN7A', 'CPLX2', 'LIN7C', 'SYN2', 'SYN1', 'RPH3A', 'PCLO', 'DNAJC5']	0.00230366	0	0
24	25	Spliceosomal Complex Assembly (GO:0000245)	1.60141e-05	4.12345	45.5314	['SF3B3', 'CELF1', 'CELF2', 'CELF3', 'CELF4', 'CELF6', 'PRPF19', 'HTATSF1', 'SETX', 'RBMX2', 'RSRP1', 'LUC7L', 'LUC7L3', 'KHDC4', 'SNRPF', 'RBM5']	0.00230366	0	0
25	26	Cellular Response To Histamine (GO:0071420)	1.64638e-05	59.0013	649.861	['GABRB3', 'DIAPH1', 'GABRB2', 'GABRB1', 'GABRG2']	0.00230366	0	0
26	27	Positive Regulation Of Excitatory Postsynaptic Potential (GO:2000463)	2.11431e-05	8.18505	88.1055	['STX1B', 'NLGN1', 'GRIN2A', 'NETO1', 'NRXN1', 'PTK2B', 'GRIN2B', 'PRKCZ', 'GRIN1']	0.00284883	0	0
27	28	Axon Development (GO:0061564)	2.21205e-05	3.19646	34.2629	['SEMA5A', 'SPTBN4', 'BRSK2', 'AMIGO1', 'PLPPR4', 'APLP1', 'RTN4RL2', 'ANK3', 'NREP', 'NMNAT2', 'BAIAP2', 'MAPK8IP3', 'CAMSAP2', 'NEUROD2', 'RTN4RL1', 'MAP1B', 'PARD3', 'SLITRK4', 'NRCAM', 'MARK2', 'CDK5R1']	0.00287409	0	0
28	29	Nuclear-Transcribed mRNA Catabolic Process (GO:0000956)	2.4786e-05	3.41568	36.2241	['UPF1', 'SMG1', 'DDX5', 'NBAS', 'NCBP2', 'UPF3A', 'PNRC2', 'CTIF', 'EXOSC6', 'EXOSC10', 'EXOSC4', 'CNOT7', 'THRAP3', 'CNOT2', 'MRTO4', 'CNOT3', 'TNKS1BP1', 'RNPS1', 'MTPAP']	0.00310937	0	0
29	30	Positive Regulation Of mRNA Catabolic Process (GO:0061014)	2.69788e-05	4.81043	50.6079	['UPF1', 'YTHDF1', 'YTHDF3', 'CELF1', 'ROCK2', 'METTL3', 'PUM1', 'GTPBP1', 'TNRC6C', 'EIF4ENIF1', 'CNOT7', 'TNRC6A', 'TNRC6B']	0.00327163	0	0
30	31	Vesicle-Mediated Transport (GO:0016192)	3.42422e-05	1.88732	19.4055	['SNAP25', 'ARF1', 'DOC2A', 'ZFYVE9', 'MIA3', 'AP2A2', 'RPH3A', 'ZFYVE27', 'AP1G2', 'CPNE1', 'GPRASP1', 'VPS39', 'TRIM23', 'RAB2A', 'PRKCI', 'VPS13B', 'EPS15L1', 'COMMD1', 'MAPK8IP3', 'DNM1', 'STX1B', 'HEATR5B', 'LRRC7', 'DNAJC5', 'VAMP1', 'CHMP3', 'CHMP7', 'ARF5', 'NAPA', 'SNAP47', 'SPTBN4', 'ARL6', 'MGRN1', 'STX16', 'STXBP1', 'VPS4A', 'KALRN', 'RHOBTB2', 'AP3M2', 'NCKIPSD', 'AP2S1', 'ATP6V1H', …	0.00401849	0	0
31	32	RNA Processing (GO:0006396)	3.60009e-05	2.42732	24.8362	['TCERG1', 'SF3B3', 'FASTKD1', 'PDCD7', 'CELF1', 'CSTF3', 'CELF2', 'AKAP8L', 'CELF3', 'ADARB1', 'RNPC3', 'CCAR2', 'EXOSC6', 'EXOSC10', 'EXOSC4', 'RBM5', 'HNRNPA0', 'DDX17', 'CPSF6', 'FUS', 'NCBP2', 'METTL3', 'PRPF4B', 'FBXO11', 'SETX', 'NOVA1', 'PRPF3', 'LUC7L3', 'RNPS1', 'SNRPF', 'HNRNPC']	0.00409285	0	0
32	33	Synaptic Transmission, GABAergic (GO:0051932)	3.75152e-05	11.8115	120.369	['GABRB3', 'GABBR2', 'GABRA1', 'GABRB2', 'GABRA5', 'GABRA4', 'GABRG2']	0.00413577	0	0
33	34	Regulation Of Voltage-Gated Calcium Channel Activity (GO:1901385)	4.24713e-05	6.22452	62.6603	['CACNB1', 'PPP3CA', 'CACNB2', 'PPP3CB', 'CACNB3', 'CACNB4', 'CACNA1A', 'DMD', 'AKAP5', 'CBARP']	0.00454443	0	0
34	35	Synaptic Vesicle Exocytosis (GO:0016079)	4.75087e-05	4.89739	48.7516	['SYT5', 'SNAP25', 'SNAP47', 'SYT4', 'UNC13C', 'STX1B', 'PCLO', 'UNC13A', 'DNAJC5', 'CPLX2', 'STX2', 'SYT7']	0.00493819	0	0
35	36	Negative Regulation Of Neuron Projection Development (GO:0010977)	5.07836e-05	4.14524	40.9878	['NLGN1', 'BCL11A', 'PAQR3', 'CRMP1', 'RTN4RL2', 'THY1', 'CBFA2T2', 'ADCY6', 'STX1B', 'EFNB3', 'RTN4RL1', 'RUFY3', 'SPOCK1', 'ZNF365']	0.00513196	0	0
36	37	Regulation Of Transcription Elongation By RNA Polymerase II (GO:0034243)	7.70136e-05	3.35851	31.8102	['INTS11', 'TCERG1', 'NCBP2', 'ZMYND8', 'INTS10', 'MED8', 'MED15', 'SUPT6H', 'ELL2', 'WDR43', 'MED6', 'MED28', 'CDK9', 'LEO1', 'VHL', 'INTS6', 'INTS8']	0.00749809	0	0
37	38	Positive Regulation Of DNA-templated Transcription, Elongation (GO:0032786)	7.83198e-05	3.94741	37.3217	['TCERG1', 'CCNT2', 'NCBP2', 'ZMYND8', 'MED8', 'MED15', 'SUPT6H', 'ELL2', 'MED6', 'MED28', 'CDK9', 'LEO1', 'KAT7', 'BRD4']	0.00749809	0	0
38	39	Plasma Membrane Bounded Cell Projection Morphogenesis (GO:0120039)	9.06617e-05	4.15924	38.7158	['NCKAP1', 'CNTNAP1', 'NLGN1', 'TRIO', 'BDNF', 'MINK1', 'DCLK1', 'SLC9A6', 'TNIK', 'SRGAP3', 'WASF1', 'NBL1', 'GAS7']	0.00845711	0	0
39	40	Central Nervous System Development (GO:0007417)	9.66019e-05	2.01962	18.6712	['PRKN', 'NCKAP1', 'FOXG1', 'AMIGO1', 'MAST1', 'ADAM22', 'PKD1', 'DHX30', 'GRIN2A', 'CDH2', 'ADAM23', 'SPOCK1', 'FLNB', 'NRCAM', 'NPTX1', 'SH3GL2', 'BPTF', 'EIF2B5', 'ARNT2', 'EPHA7', 'SLC6A17', 'UTP3', 'ZBTB16', 'MINK1', 'APLP1', 'SHROOM2', 'VPS13B', 'SMARCA1', 'HPCAL4', 'GRIN2B', 'DCLK1', 'PBX1', 'POU6F1', 'GRIN1', 'ALDH3A2', 'AHI1', 'TAGLN3', 'ADGRL2', 'CDK5R2', 'ADGRL3', 'CDK5R1']	0.00878594	0	0
40	41	Neuron Development (GO:0048666)	0.000100616	2.49123	22.9298	['TENM2', 'NLGN1', 'ATP8A2', 'MYT1L', 'STMN4', 'PPP1R9A', 'PQBP1', 'UGCG', 'ATCAY', 'ZFYVE27', 'DMD', 'NCDN', 'SH3GL2', 'LGI1', 'TOR1A', 'UNC5A', 'VPS13B', 'THOC2', 'PBX1', 'EHD1', 'GPRIN1', 'MAP1B', 'RAPGEF2', 'ULK1', 'LRP12', 'CDK5R1']	0.00889845	0	0
41	42	Regulation Of mRNA Splicing, Via Spliceosome (GO:0048024)	0.000106625	3.00432	27.4781	['DDX17', 'KHDRBS1', 'RBM25', 'RBFOX1', 'DDX5', 'RBFOX2', 'RBFOX3', 'CELF1', 'CELF2', 'CELF3', 'CELF4', 'CELF6', 'THRAP3', 'NOVA1', 'RNPS1', 'RBM23', 'RBM5', 'HNRNPA0', 'SRSF12']	0.00889845	0	0
42	43	Signal Release From Synapse (GO:0099643)	0.000109388	4.81924	43.9544	['SNAP25', 'PCLO', 'UNC13A', 'NRXN1', 'STXBP1', 'DNAJC5', 'LIN7A', 'CPLX2', 'LIN7C', 'SYN2', 'SYN1']	0.00889845	0	0
43	44	Regulation Of Calcium Ion Transmembrane Transporter Activity (GO:1901019)	0.000110074	5.37485	48.9883	['JPH4', 'CACNB1', 'FKBP1A', 'CACNB2', 'CACNB3', 'CACNB4', 'CACNA1A', 'DMD', 'ANK2', 'JPH1']	0.00889845	0	0
44	45	Protein Localization (GO:0008104)	0.000110503	1.89077	17.2258	['NAPA', 'RTP5', 'ARF1', 'STX16', 'ARL6', 'STXBP1', 'VPS26B', 'PRPF19', 'PHYHIP', 'NAPG', 'GGA2', 'AKAP11', 'GGA3', 'RAB24', 'MGAT3', 'CEP250', 'DMD', 'STX2', 'CACNG3', 'TRIM23', 'TMED4', 'JAM3', 'YWHAH', 'CEP68', 'USP4', 'PAM16', 'SHROOM2', 'VPS13A', 'ANK2', 'ANK3', 'AXIN2', 'EHD1', 'REEP1', 'STX1B', 'AHI1', 'NIN', 'NBEA', 'ERCC3', 'RRAGB', 'HEATR5B', 'PARD3', 'SNX15', 'PICK1', 'ATG4B', 'ULK1', …	0.00889845	0	0
45	46	Positive Regulation Of Cell Projection Organization (GO:0031346)	0.000112515	2.71989	24.7304	['PRKCI', 'NLGN1', 'CAMK1D', 'BDNF', 'SS18L1', 'AMIGO1', 'NTRK3', 'CBFA2T2', 'CX3CL1', 'SETX', 'TIAM1', 'LRRC7', 'NPTN', 'EP300', 'PLXNA1', 'RAPGEF2', 'PTK2B', 'CAMK1', 'OBSL1', 'SCN1B', 'MARK2', 'PLXNA4']	0.00889845	0	0
46	47	Cytoskeleton Organization (GO:0007010)	0.000128618	2.76846	24.8017	['PRKCI', 'CNTNAP1', 'DMTN', 'MAST4', 'MAST3', 'TPM1', 'MAST1', 'MICAL3', 'MICAL2', 'THY1', 'SIPA1L3', 'NCKIPSD', 'STRIP1', 'DIAPH1', 'PCLO', 'PACSIN2', 'RICTOR', 'TNIK', 'BRWD1', 'OBSL1', 'PDZD8']	0.00995559	0	0
47	48	Ionotropic Glutamate Receptor Signaling Pathway (GO:0035235)	0.000140041	11.8046	104.749	['GRIA2', 'GRIN2A', 'PTK2B', 'GRIN2B', 'CDK5R1', 'GRIN1']	0.0105173	0	0
48	49	Neuron Projection Extension (GO:1990138)	0.000141657	4.64687	41.1811	['SEMA5A', 'NELL2', 'PPP3CB', 'NRN1', 'AUTS2', 'SLC9A6', 'MAP1B', 'CPNE1', 'ULK1', 'EIF2AK4', 'SH3GL2']	0.0105173	0	0
49	50	Axonogenesis (GO:0007409)	0.000146251	2.2576	19.9351	['CYFIP2', 'SEMA5A', 'SPTBN4', 'BRSK2', 'TRIO', 'NRXN1', 'PLPPR4', 'MYCBP2', 'NRXN3', 'KALRN', 'PPP3CB', 'EFNB3', 'SLITRK4', 'SLIT1', 'NRCAM', 'SCN1B', 'LGI1', 'EPHA7', 'EPHA6', 'AUTS2', 'BDNF', 'APLP1', 'ANK3', 'BAIAP2', 'NELL2', 'SLC9A6', 'MAP1B', 'PARD3', 'ULK1', 'CDK5R1']	0.0106412	0	0
50	51	Histone Acetylation (GO:0016573)	0.000174075	3.60338	31.1909	['NAA60', 'SF3B3', 'MEAF6', 'TRRAP', 'USP22', 'TADA2B', 'YEATS2', 'EP400', 'EP300', 'EPC2', 'BRD8', 'DMAP1', 'MAP3K7', 'KAT14']	0.0123138	0	0
51	52	Regulation Of Retrograde Transport, Endosome To Golgi (GO:1905279)	0.000176008	47.1708	407.791	['PRKN', 'USP7', 'EIPR1', 'ATP9A']	0.0123138	0	0
52	53	Transcription Elongation By RNA Polymerase II (GO:0006368)	0.000190821	5.59847	47.9463	['CDK9', 'PCID2', 'ELOF1', 'SART3', 'ERCC3', 'LEO1', 'RTF1', 'SUPT6H', 'GTF2F2']	0.012807	0	0
53	54	Response To Calcium Ion (GO:0051592)	0.000191457	2.75808	23.6115	['SYT5', 'SYT4', 'RYR2', 'NLGN1', 'DMTN', 'KCNIP2', 'ANXA11', 'CACNA1A', 'ADCY1', 'SYT13', 'SYT7', 'SYT17', 'NEUROD2', 'PPP3CA', 'STIM1', 'ITPKA', 'KCNMA1', 'CPNE1', 'CPNE3', 'SLC25A12']	0.012807	0	0
54	55	Regulation Of Neuronal Synaptic Plasticity (GO:0048168)	0.000193619	4.92641	42.1189	['GRIN2A', 'NETO1', 'SLC4A10', 'GRIK2', 'NCDN', 'GRIN2B', 'SHISA7', 'DBN1', 'SLC8A2', 'GRIN1']	0.012807	0	0
55	56	Axon Extension (GO:0048675)	0.000234863	6.30079	52.6526	['SEMA5A', 'NELL2', 'PPP3CB', 'AUTS2', 'SLC9A6', 'MAP1B', 'SLIT1', 'ULK1']	0.0151723	0	0
56	57	Positive Regulation Of Double-Strand Break Repair (GO:2000781)	0.000237719	3.00647	25.0873	['SMARCB1', 'MEAF6', 'TRRAP', 'FUS', 'SMARCA2', 'SMARCA4', 'MRNIP', 'BCL7A', 'DPF1', 'EP400', 'DPF3', 'EPC2', 'MMS19', 'TRAPPC13', 'BRD8', 'DMAP1', 'HDGFL2']	0.0151723	0	0
57	58	Chromatin Organization (GO:0006325)	0.000266049	1.96694	16.1915	['KDM5A', 'NAA60', 'INO80B', 'KDM5B', 'SMARCB1', 'HDAC3', 'CHD6', 'EHMT1', 'PSIP1', 'NUDT5', 'CABIN1', 'ING5', 'HIRA', 'SART3', 'BCL7A', 'DPF1', 'UBN1', 'DPF3', 'KAT7', 'HMGN3', 'BPTF', 'PHC1', 'NPM2', 'PIH1D1', 'NAP1L3', 'SSRP1', 'SMARCA1', 'SMARCA2', 'GATAD2B', 'SMARCA4', 'TADA2B', 'RYBP', 'MYBBP1A', 'YEATS2', 'HNRNPC', 'HDGFL2', 'EZH1', 'FAM50B']	0.0166877	0	0
58	59	Calcium Ion Transport Into Cytosol (GO:0060402)	0.000282756	14.7479	120.504	['JPH4', 'RYR2', 'CACNB3', 'CACNA2D1', 'JPH1']	0.0171444	0	0
59	60	Response To Histamine (GO:0034776)	0.000282756	14.7479	120.504	['GABRB3', 'DIAPH1', 'GABRB2', 'GABRB1', 'GABRG2']	0.0171444	0	0
60	61	Regulation Of Cation Channel Activity (GO:2001257)	0.000310475	3.57771	28.8987	['CACNA1A', 'ANK2', 'ANK3', 'JPH1', 'JPH4', 'CACNB1', 'FKBP1A', 'CACNB2', 'CACNB3', 'CACNB4', 'FGF14', 'NETO1', 'DMD']	0.0185165	0	0
61	62	Positive Regulation Of Double-Strand Break Repair Via Homologous Recombination (GO:1905168)	0.000324875	4.54696	36.5215	['MRNIP', 'MEAF6', 'TRRAP', 'FUS', 'EP400', 'EPC2', 'MMS19', 'BRD8', 'DMAP1', 'HDGFL2']	0.0190628	0	0
62	63	Regulation Of Double-Strand Break Repair Via Homologous Recombination (GO:0010569)	0.000333481	3.17166	25.392	['MEAF6', 'TRRAP', 'FUS', 'MRNIP', 'PPP4R2', 'EP400', 'TERF2IP', 'EPC2', 'MMS19', 'TRAPPC13', 'BRD8', 'DMAP1', 'TP53BP1', 'HDGFL2', 'ZNF365']	0.0192572	0	0
63	64	Ephrin Receptor Signaling Pathway (GO:0048013)	0.000363452	4.06513	32.1953	['TIAM1', 'EPHA7', 'EFNB3', 'SIPA1L1', 'EPHA6', 'SRC', 'RASA1', 'ARHGEF7', 'KALRN', 'ANKS1B', 'CDK5R1']	0.0203421	0	0
64	65	Positive Regulation Of Transcription Elongation By RNA Polymerase II (GO:0032968)	0.000363452	4.06513	32.1953	['CDK9', 'TCERG1', 'NCBP2', 'ZMYND8', 'LEO1', 'MED8', 'MED15', 'SUPT6H', 'ELL2', 'MED6', 'MED28']	0.0203421	0	0
65	66	Negative Regulation Of Cell Projection Organization (GO:0031345)	0.000377668	3.73566	29.4426	['STX1B', 'RTN4RL1', 'PAQR3', 'RAPGEF2', 'CRMP1', 'SPOCK1', 'RTN4RL2', 'CBFA2T2', 'GRIN2B', 'ADCY6', 'YWHAH', 'ZNF365']	0.0208175	0	0
66	67	Calcium Ion Transmembrane Transport (GO:0070588)	0.000412622	2.96083	23.0737	['SLC24A2', 'CACNA2D1', 'ATP2B4', 'CACNA1A', 'ATP2B3', 'ATP2B1', 'PKD1', 'GRIN2B', 'SLC8A2', 'GRIN1', 'CACNB1', 'FKBP1A', 'LETM1', 'CACNB3', 'GRIN2A', 'MICU2']	0.0221616	0	0
67	68	Regulation Of Sodium Ion Transmembrane Transporter Activity (GO:2000649)	0.000414236	4.37832	34.103	['FGF14', 'NETO1', 'PRKCE', 'NEDD4L', 'GLRX', 'DMD', 'GPD1L', 'SCN1B', 'YWHAH', 'SCN2B']	0.0221616	0	0
68	69	Regulation Of Cell-Matrix Adhesion (GO:0001952)	0.00042315	3.24922	25.2392	['LIMCH1', 'ROCK2', 'PLEKHA2', 'MINK1', 'TSC1', 'PIK3CB', 'THY1', 'CX3CL1', 'AJAP1', 'CAMSAP3', 'RASA1', 'ENC1', 'PTK2B', 'CLASP1']	0.0223104	0	0
69	70	Regulation Of DNA-templated Transcription Elongation (GO:0032784)	0.000450674	3.94173	30.3701	['INTS11', 'SETD5', 'CCNT2', 'WDR82', 'INTS10', 'KAT7', 'INTS6', 'HTATSF1', 'INTS8', 'CCAR2', 'WDR43']	0.0230983	0	0
70	71	Chromatin Remodeling (GO:0006338)	0.000450791	2.01201	15.5016	['KDM5A', 'INO80B', 'KDM5B', 'NFAT5', 'SMARCB1', 'CHD6', 'PSIP1', 'NUDT5', 'CHD2', 'SUPT6H', 'HIRA', 'SART3', 'BCL7A', 'DPF1', 'DPF3', 'BPTF', 'PCID2', 'PHC1', 'NPM2', 'PIH1D1', 'SMARCA1', 'SMARCA2', 'GATAD2B', 'SMARCA4', 'TADA2B', 'CDK9', 'MCM3AP', 'RYBP', 'MYBBP1A', 'YEATS2', 'HNRNPC', 'HDGFL2', 'EZH1']	0.0230983	0	0
71	72	Positive Regulation Of DNA Recombination (GO:0045911)	0.000459095	3.63967	27.9755	['MRNIP', 'MEAF6', 'TRRAP', 'FUS', 'EP400', 'EPC2', 'MMS19', 'TRAPPC13', 'BRD8', 'DMAP1', 'TP53BP1', 'HDGFL2']	0.0231971	0	0
72	73	Regulation Of Vesicle-Mediated Transport (GO:0060627)	0.000485763	2.79693	21.34	['MBTPS1', 'PTPN1', 'MAP2K1', 'USP7', 'RALA', 'SRC', 'RAB3D', 'YIPF5', 'OCRL', 'CPLX2', 'STXBP5L', 'DNAJC5', 'AP2S1', 'PACSIN2', 'CHMP3', 'MAPK1', 'ATP9A']	0.0242083	0	0
73	74	Synaptic Vesicle Docking (GO:0016081)	0.0004951	23.5841	179.493	['SNAP25', 'STX1B', 'UNC13C', 'UNC13A']	0.0243402	0	0
74	75	Long-Term Synaptic Potentiation (GO:0060291)	0.000557139	6.35799	47.6385	['SLC24A2', 'GRIN2A', 'NPTN', 'PTK2B', 'GRIN2B', 'PRKCZ', 'SLC8A2']	0.027025	0	0
75	76	Negative Regulation Of Proteasomal Ubiquitin-Dependent Protein Catabolic Process (GO:0032435)	0.000582234	4.62382	34.4412	['SDCBP', 'USP7', 'RYBP', 'CAMLG', 'DDRGK1', 'SGTA', 'OGT', 'CCAR2', 'N4BP1']	0.0275504	0	0
76	77	Plasma Membrane Bounded Cell Projection Organization (GO:0120036)	0.000583116	2.37191	17.6639	['LGI1', 'NLGN1', 'TOR1A', 'UNC5A', 'PLEKHA1', 'TPM1', 'VPS13B', 'STMN4', 'PPP1R9A', 'PQBP1', 'EHD1', 'ATCAY', 'ZFYVE27', 'GPRIN1', 'MAP1B', 'RAPGEF2', 'ULK1', 'CCDC32', 'NCDN', 'SH3GL2', 'LRP12', 'CDK5R1']	0.0275504	0	0
77	78	DNA-templated Transcription Elongation (GO:0006354)	0.000605369	5.2498	38.8993	['CDK9', 'PCID2', 'ELOF1', 'ERCC3', 'LEO1', 'RTF1', 'SUPT6H', 'GTF2F2']	0.0282351	0	0
78	79	Protein Phosphorylation (GO:0006468)	0.000622846	1.62813	12.0176	['GPI', 'SMG1', 'MAST4', 'MAML1', 'MAST3', 'MAST1', 'PKD1', 'PPP3CB', 'CAMKV', 'AKT2', 'CDK20', 'PRKACB', 'MAP3K7', 'STK32C', 'PDK2', 'PRKCI', 'MAP2K1', 'EPHA7', 'EPHA6', 'CAMK1D', 'DAPK1', 'PDPK1', 'PRKCE', 'IGFBP3', 'MINK1', 'LMTK3', 'ADAM10', 'LMTK2', 'PRPF4B', 'ILF3', 'PRKAR1B', 'INCENP', 'PICK1', 'MAPKAPK5', 'ULK1', 'TNIK', 'BRSK2', 'PNCK', 'ROCK2', 'SRC', 'PRKCZ', 'NUAK1', 'MAP3K20', 'MAPK1…	0.0286825	0	0
79	80	Histone H4 Acetylation (GO:0043967)	0.000654648	4.07592	29.8823	['ING5', 'MEAF6', 'TRRAP', 'EP400', 'MSL2', 'EPC2', 'KAT7', 'BRD8', 'DMAP1', 'OGT']	0.0294026	0	0
80	81	Internal Peptidyl-Lysine Acetylation (GO:0018393)	0.000654648	4.07592	29.8823	['MEAF6', 'YEATS2', 'TRRAP', 'EP400', 'EP300', 'EPC2', 'KAT7', 'BRD8', 'DMAP1', 'KAT14']	0.0294026	0	0
81	82	Protein Localization To Cell Periphery (GO:1990778)	0.000669157	2.29254	16.7573	['LRPAP1', 'SPTBN4', 'PPIL2', 'ROCK2', 'KCNB1', 'RAB3D', 'STXBP1', 'KCNIP4', 'ANK2', 'LIN7A', 'ANK3', 'ZDHHC22', 'LIN7C', 'EHD1', 'CACNB2', 'CACNB3', 'DPP6', 'EHD3', 'ZFYVE27', 'MYADM', 'MAP7', 'RAPGEF2', 'TNIK']	0.0296877	0	0
82	83	Positive Regulation Of Neuron Projection Development (GO:0010976)	0.000722601	2.68461	19.4169	['PRKCI', 'NLGN1', 'CAMK1D', 'BDNF', 'NTRK3', 'CBFA2T2', 'CX3CL1', 'SETX', 'LRRC7', 'NPTN', 'EP300', 'RAPGEF2', 'PTK2B', 'CAMK1', 'SCN1B', 'DBN1', 'MARK2']	0.0316726	0	0
83	84	Regulation Of Cardiac Conduction (GO:1903779)	0.000779553	5.90353	42.2503	['RYR2', 'ATP2B4', 'ATP2B3', 'ANK2', 'ATP2B2', 'ATP2B1', 'SLC8A2']	0.033762	0	0
84	85	Positive Regulation Of Nucleic Acid-Templated Transcription (GO:1903508)	0.000794924	1.57807	11.2631	['KDM5A', 'TRRAP', 'ELK1', 'ING1', 'PPP3CB', 'ZMIZ1', 'NUP62', 'SPIN1', 'EP300', 'EPC2', 'BTRC', 'YAF2', 'RNF111', 'YWHAH', 'NCOA1', 'ARHGEF11', 'MAP2K1', 'PCID2', 'MSL2', 'RFX3', 'ILF3', 'ELF2', 'PSRC1', 'THRAP3', 'MAPRE3', 'PLCB1', 'RBM23', 'INO80B', 'SF3B3', 'MEAF6', 'KMT2A', 'WBP2', 'CXXC1', 'FOXK1', 'MLLT3', 'NSD3', 'SEC14L2', 'RXRB', 'NSD1', 'EP400', 'BRD8', 'TP53BP1', 'DMAP1', 'VHL', 'TRIM…	0.0339135	0	0
85	86	Regulation Of Catecholamine Secretion (GO:0050433)	0.000801693	4.97323	35.4531	['PRKN', 'CHRNB2', 'SYT5', 'SYT4', 'KCNB1', 'SYT13', 'SYT7', 'SYT17']	0.0339135	0	0
86	87	Establishment Or Maintenance Of Epithelial Cell Apical/Basal Polarity (GO:0045197)	0.000812307	3.93984	28.0345	['CAMSAP3', 'PATJ', 'PRKCI', 'WDR1', 'DLG3', 'PARD3', 'LIN7A', 'LIN7C', 'PRKCZ', 'MARK2']	0.0339675	0	0
87	88	Regulation Of Cytoplasmic Transport (GO:1903649)	0.000907321	9.83088	68.8655	['MAP2K1', 'USP7', 'SRC', 'CHMP3', 'MAPK1']	0.037088	0	0
88	89	Regulation Of Endocytic Recycling (GO:2001135)	0.000907321	9.83088	68.8655	['EHD1', 'EIPR1', 'OCRL', 'SORL1', 'ATP9A']	0.037088	0	0
89	90	Regulation Of Golgi Organization (GO:1903358)	0.000923012	7.08123	49.4827	['CAMSAP3', 'MAP2K1', 'EHD3', 'MAPK1', 'ARMH3', 'CAMSAP2']	0.0373102	0	0
90	91	Transcription Initiation-Coupled Chromatin Remodeling (GO:0045815)	0.00094415	4.25345	29.6263	['RBM14', 'SMARCB1', 'KMT2A', 'WBP2', 'RBBP5', 'EP300', 'KAT7', 'SMARCA4', 'GLYR1']	0.0374809	0	0
91	92	Regulation Of Synaptic Transmission, Glutamatergic (GO:0051966)	0.00094784	3.30038	22.975	['NLGN1', 'GRIN2A', 'UNC13A', 'CDH2', 'NRXN1', 'PLPPR4', 'PTK2B', 'CACNG3', 'GRIN2B', 'GRM1', 'DGKI', 'GRIN1']	0.0374809	0	0
92	93	Positive Regulation Of Synaptic Transmission, Glutamatergic (GO:0051968)	0.00106662	5.50966	37.704	['NLGN1', 'GRIN2A', 'NRXN1', 'PTK2B', 'GRIN2B', 'CACNG3', 'GRIN1']	0.0412804	0	0
93	94	Regulation Of Dopamine Secretion (GO:0014059)	0.00106662	5.50966	37.704	['CHRNB2', 'PRKN', 'SYT5', 'SYT4', 'SYT13', 'SYT7', 'SYT17']	0.0412804	0	0
94	95	Positive Regulation Of Endocytic Recycling (GO:2001137)	0.0010834	15.7219	107.344	['EHD1', 'EIPR1', 'AKAP5', 'SORL1']	0.0414884	0	0
95	96	Regulation Of Regulated Secretory Pathway (GO:1903305)	0.00118368	4.08964	27.5606	['RPH3A', 'SYT5', 'SYT4', 'PREPL', 'RAB3D', 'SYT13', 'SYN1', 'SYT7', 'SYT17']	0.0448565	0	0
96	97	Regulation Of Axonogenesis (GO:0050770)	0.00122144	3.6932	24.773	['TIAM1', 'BRSK2', 'EFNB3', 'SIPA1L1', 'CDH2', 'RUFY3', 'PLXNA1', 'THY1', 'MARK2', 'PLXNA4']	0.0449926	0	0
97	98	Regulation Of Neurotransmitter Receptor Activity (GO:0099601)	0.00122144	3.6932	24.773	['NLGN1', 'NETO1', 'DAPK1', 'MINK1', 'PTK2B', 'DLGAP1', 'NPTX1', 'NPTXR', 'CACNG3', 'SHISA7']	0.0449926	0	0
98	99	Regulation Of Double-Strand Break Repair (GO:2000779)	0.00122437	2.6307	17.6397	['SMARCB1', 'MEAF6', 'TRRAP', 'SMARCA2', 'SMARCA4', 'MRNIP', 'BCL7A', 'PPP4R2', 'DPF1', 'EP400', 'DPF3', 'TERF2IP', 'EPC2', 'BRD8', 'DMAP1', 'ZNF365']	0.0449926	0	0
99	100	Synapse Organization (GO:0050808)	0.00128443	2.26263	15.0633	['UNC13C', 'NLGN1', 'UNC13A', 'NLGN4X', 'BDNF', 'NRXN1', 'LRRC4', 'ANK3', 'CX3CL1', 'SLC8A2', 'CACNB1', 'CACNB2', 'CACNB3', 'PPFIBP1', 'CACNB4', 'CDH2', 'PIN1', 'NRCAM', 'SNCB', 'PPFIA2', 'ADGRL3']	0.0467277	0	0
100	101	Embryo Development Ending In Birth Or Egg Hatching (GO:0009792)	0.00133249	6.43713	42.6184	['CAMSAP3', 'STOX2', 'CELF1', 'USP22', 'CELF4', 'RICTOR']	0.0470985	0	0
101	102	mRNA Cis Splicing, Via Spliceosome (GO:0045292)	0.00133249	6.43713	42.6184	['PRPF39', 'NCBP2', 'PSIP1', 'HNRNPC', 'CACTIN', 'SRSF12']	0.0470985	0	0
102	103	Cardiac Muscle Cell Action Potential (GO:0086001)	0.00134641	4.4991	29.7404	['KCND3', 'KCNIP2', 'CACNA2D1', 'DMD', 'ATP1A1', 'SCN1B', 'SCN1A', 'SCN2B']	0.0470985	0	0
103	104	Regulation Of Monoatomic Ion Transmembrane Transport (GO:0034765)	0.00134641	4.4991	29.7404	['KCNJ4', 'GRIN2A', 'KCNJ6', 'KCNJ9', 'NEDD4L', 'GRIN2B', 'KCNJ3', 'GRIN1']	0.0470985	0	0
104	105	Histone Modification (GO:0016570)	0.00141805	2.68964	17.6399	['HDAC3', 'MEAF6', 'UBE2B', 'TRRAP', 'GATAD2B', 'ING5', 'YEATS2', 'CARM1', 'EP400', 'EP300', 'EPC2', 'KAT7', 'BRD8', 'DMAP1', 'KAT14']	0.048575	0	0
105	106	Adult Locomotory Behavior (GO:0008344)	0.00145538	8.42601	55.0428	['PRKN', 'SPTBN4', 'TSC1', 'BTBD9', 'PUM1']	0.048575	0	0
106	107	Positive Regulation Of Nuclear-Transcribed mRNA poly(A) Tail Shortening (GO:0060213)	0.00145538	8.42601	55.0428	['TNRC6C', 'EIF4ENIF1', 'CNOT7', 'TNRC6A', 'TNRC6B']	0.048575	0	0
107	108	Positive Regulation Of Regulated Secretory Pathway (GO:1903307)	0.00145538	8.42601	55.0428	['SCAMP5', 'SYT4', 'NLGN1', 'KCNB1', 'RAB3D']	0.048575	0	0
108	109	Positive Regulation Of Voltage-Gated Calcium Channel Activity (GO:1901387)	0.00145538	8.42601	55.0428	['CACNB2', 'PPP3CA', 'CACNB3', 'PPP3CB', 'CACNA2D1']	0.048575	0	0

## Sheet: ML_GO_result
Unnamed: 0	Rank	Term name	P-value	Z-score	Combined score	Overlapping genes	Adjusted p-value	Old p-value	Old adjusted p-value
0	1	Learning (GO:0007612)	3.74237e-06	24.8772	310.86	['CLDN5', 'ATXN1', 'DLG4', 'SHANK3', 'SHANK1']	0.00229309	0	0
1	2	Regulation Of Protein Modification Process (GO:0031399)	4.7086e-06	23.631	289.86	['PPP1R16B', 'CDH5', 'FN1', 'NOP53', 'PTK2']	0.00229309	0	0
2	3	Regulation Of Neuron Migration (GO:2001222)	1.85024e-05	29.9849	326.764	['NTNG2', 'ZNF609', 'CAMK2A', 'NSMF']	0.00367915	0	0
3	4	Response To Interferon-Beta (GO:0035456)	1.85024e-05	29.9849	326.764	['IFITM3', 'IFITM1', 'IFITM2', 'CAMK2A']	0.00367915	0	0
4	5	Regulation Of Long-Term Neuronal Synaptic Plasticity (GO:0048169)	1.88868e-05	79.6382	866.228	['DLG4', 'NEURL1', 'SHANK3']	0.00367915	0	0
5	6	Dendrite Morphogenesis (GO:0048813)	3.97664e-05	24.1741	244.943	['DLG4', 'BTBD3', 'SHANK3', 'SHANK1']	0.00645542	0	0
6	7	Type I Interferon-Mediated Signaling Pathway (GO:0060337)	4.97374e-05	22.7067	224.995	['IFITM3', 'IFITM1', 'IFITM2', 'IFI27']	0.00673937	0	0
7	8	Cellular Response To Type I Interferon (GO:0071357)	5.53542e-05	22.0377	216.009	['IFITM3', 'IFITM1', 'IFITM2', 'IFI27']	0.00673937	0	0
8	9	Dendritic Spine Morphogenesis (GO:0060997)	7.01908e-05	46.4439	444.203	['DLG4', 'SHANK3', 'SHANK1']	0.0075962	0	0
9	10	Response To Interferon-Alpha (GO:0035455)	0.000104063	39.8051	365.033	['IFITM3', 'IFITM1', 'IFITM2']	0.00954158	0	0
10	11	Negative Regulation Of Viral Entry Into Host Cell (GO:0046597)	0.000124376	37.1495	334.056	['IFITM3', 'IFITM1', 'IFITM2']	0.00954158	0	0
11	12	Bicellular Tight Junction Assembly (GO:0070830)	0.000128764	17.4173	156.016	['CDH5', 'CLDN5', 'PARD3', 'PECAM1']	0.00954158	0	0
12	13	Regulation Of Phosphatidylinositol 3-Kinase Signaling (GO:0014066)	0.000139196	11.0952	98.5216	['PPP1R16B', 'FN1', 'NOP53', 'DCN', 'PTK2']	0.00954158	0	0
13	14	Regulation Of Angiogenesis (GO:0045765)	0.000139956	6.75905	59.981	['PPP1R16B', 'SEMA5A', 'CDH5', 'CLDN5', 'APLNR', 'DCN', 'AQP1']	0.00954158	0	0
14	15	Interferon-Mediated Signaling Pathway (GO:0140888)	0.00015167	16.6415	146.342	['IFITM3', 'IFITM1', 'IFITM2', 'IFI27']	0.00954158	0	0
15	16	Neuron Projection Morphogenesis (GO:0048812)	0.000156741	8.13874	71.3028	['NTNG2', 'DLG4', 'PARD3', 'BTBD3', 'SHANK3', 'SHANK1']	0.00954158	0	0
16	17	Negative Regulation Of Viral Life Cycle (GO:1903901)	0.000172375	32.7757	284.029	['IFITM3', 'IFITM1', 'IFITM2']	0.00987605	0	0
17	18	Regulation Of Dendritic Spine Development (GO:0060998)	0.0002003	30.9533	263.589	['NEURL1', 'SHANK3', 'SHANK1']	0.0100374	0	0
18	19	Positive Regulation Of Dendritic Spine Development (GO:0060999)	0.0002003	30.9533	263.589	['NEURL1', 'SHANK3', 'SHANK1']	0.0100374	0	0
19	20	Tight Junction Assembly (GO:0120192)	0.000206107	15.2799	129.683	['CDH5', 'CLDN5', 'PARD3', 'PECAM1']	0.0100374	0	0
20	21	Apical Junction Assembly (GO:0043297)	0.000221658	14.9736	125.993	['CDH5', 'CLDN5', 'PARD3', 'PECAM1']	0.010227	0	0
21	22	Positive Regulation Of Excitatory Postsynaptic Potential (GO:2000463)	0.000231	29.3227	245.522	['DLG4', 'SHANK3', 'SHANK1']	0.010227	0	0
22	23	Regulation Of Cation Channel Activity (GO:2001257)	0.000255268	14.3962	119.103	['JPH4', 'JPH3', 'AHNAK', 'HCN2']	0.01081	0	0
23	24	Memory (GO:0007613)	0.000292392	13.8616	112.798	['ATXN1', 'CAMK2N1', 'SHANK3', 'SHANK1']	0.0111085	0	0
24	25	Positive Regulation Of Endothelial Cell Development (GO:1901552)	0.000296531	122.759	997.218	['CDH5', 'CLDN5']	0.0111085	0	0
25	26	Positive Regulation Of Establishment Of Endothelial Barrier (GO:1903142)	0.000296531	122.759	997.218	['CDH5', 'CLDN5']	0.0111085	0	0
26	27	Dendritic Spine Organization (GO:0097061)	0.000383808	24.2182	190.485	['DLG4', 'SHANK3', 'SHANK1']	0.0138455	0	0
27	28	Regulation Of Viral Genome Replication (GO:0045069)	0.000508571	11.876	90.0665	['IFITM3', 'IFITM1', 'IFITM2', 'ADARB1']	0.0173036	0	0
28	29	Positive Regulation Of Dephosphorylation (GO:0035306)	0.000532967	21.4206	161.448	['PPP1R16B', 'CDH5', 'NSMF']	0.0173036	0	0
29	30	Maintenance Of Blood-Brain Barrier (GO:0035633)	0.000532967	21.4206	161.448	['CDH5', 'CLDN5', 'PECAM1']	0.0173036	0	0
30	31	Modulation Of Chemical Synaptic Transmission (GO:0050804)	0.000592915	7.97902	59.2877	['BCR', 'DLG4', 'CAMK2A', 'CPLX2', 'DGKI']	0.0177781	0	0
31	32	Regulation Of G Protein-Coupled Receptor Signaling Pathway (GO:0008277)	0.000600737	11.3345	84.0718	['RGS5', 'GNG7', 'CAMK2A', 'PPP1R9B']	0.0177781	0	0
32	33	Nervous System Development (GO:0007399)	0.000649192	4.09102	30.0272	['SEMA5A', 'ATXN1', 'DLG4', 'BTBD3', 'NEURL1', 'ATN1', 'FN1', 'ZNF358', 'SHANK3']	0.0177781	0	0
33	34	Modulation Of Excitatory Postsynaptic Potential (GO:0098815)	0.000650415	19.8885	145.94	['DLG4', 'SHANK3', 'SHANK1']	0.0177781	0	0
34	35	Regulation Of Cell Migration (GO:0030334)	0.000659938	4.08119	29.888	['SEMA5A', 'CDH5', 'NTNG2', 'CLDN5', 'IFITM1', 'CAMK2A', 'PECAM1', 'ADARB1', 'PTK2']	0.0177781	0	0
35	36	Transforming Growth Factor Beta Receptor Signaling Pathway (GO:0007179)	0.000668398	11	80.4169	['SKI', 'CDH5', 'CLDN5', 'PTK2']	0.0177781	0	0
36	37	Regulation Of Calcium Ion Transmembrane Transporter Activity (GO:1901019)	0.000714838	19.2017	139.087	['JPH4', 'JPH3', 'AHNAK']	0.0177781	0	0
37	38	Positive Regulation Of Cell Migration (GO:0030335)	0.000770025	5.03297	36.0818	['SEMA5A', 'CDH5', 'ZNF609', 'FN1', 'PECAM1', 'NSMF', 'PTK2']	0.0177781	0	0
38	39	Positive Regulation Of Protein Dephosphorylation (GO:0035307)	0.000783188	18.5607	132.749	['PPP1R16B', 'CDH5', 'NSMF']	0.0177781	0	0
39	40	Circulatory System Development (GO:0072359)	0.000816305	7.4102	52.6919	['CDH5', 'APLNR', 'FN1', 'DZIP1', 'PCSK5']	0.0177781	0	0
40	41	Regulation Of Gap Junction Assembly (GO:1903596)	0.000821371	61.3704	436.008	['APLNR', 'AGT']	0.0177781	0	0
41	42	Schwann Cell Development (GO:0014044)	0.000821371	61.3704	436.008	['SKI', 'PARD3']	0.0177781	0	0
42	43	Peripheral Nervous System Axon Ensheathment (GO:0032292)	0.000821371	61.3704	436.008	['SKI', 'PARD3']	0.0177781	0	0
43	44	Positive Regulation Of Blood Vessel Endothelial Cell Proliferation Involved In Sprouting Angiogenesis (GO:1903589)	0.000821371	61.3704	436.008	['PPP1R16B', 'APLNR']	0.0177781	0	0
44	45	Positive Regulation Of Mitochondrial Calcium Ion Concentration (GO:0051561)	0.000821371	61.3704	436.008	['SLC25A23', 'TGM2']	0.0177781	0	0
45	46	Regulation Of Neuronal Synaptic Plasticity (GO:0048168)	0.000855558	17.9611	126.873	['DLG4', 'CAMK2A', 'NSMF']	0.0181155	0	0
46	47	Response To Type II Interferon (GO:0034341)	0.000993542	9.83813	68.0232	['IFITM3', 'IFITM1', 'IFITM2', 'CAMK2A']	0.0205896	0	0
47	48	Calcium Ion Transport Into Cytosol (GO:0060402)	0.00105226	52.6005	360.672	['JPH4', 'JPH3']	0.0209163	0	0
48	49	Lipid Phosphorylation (GO:0046834)	0.00105226	52.6005	360.672	['DGKB', 'DGKI']	0.0209163	0	0
49	50	Regulation Of Phosphorylation (GO:0042325)	0.00108956	9.58491	65.3881	['CDH5', 'FN1', 'NOP53', 'PTK2']	0.0212245	0	0
50	51	Regulation Of Neurotransmitter Secretion (GO:0046928)	0.00118703	15.9052	107.142	['CAMK2A', 'SEPTIN5', 'CPLX2']	0.02267	0	0
51	52	Signal Release (GO:0023061)	0.0013106	46.0231	305.468	['PCSK5', 'TGM2']	0.0245486	0	0
52	53	Regulation Of Protein Dephosphorylation (GO:0035304)	0.00137918	15.044	99.0835	['PPP1R16B', 'CDH5', 'NSMF']	0.0253456	0	0
53	54	Regulation Of Filopodium Assembly (GO:0051489)	0.00170224	13.9136	88.7101	['PPP1R16B', 'PALM', 'NEURL1']	0.0307034	0	0
54	55	Regulation Of Viral Entry Into Host Cell (GO:0046596)	0.00181954	13.5735	85.6377	['IFITM3', 'IFITM1', 'IFITM2']	0.0315056	0	0
55	56	Cellular Response To Oxygen-Containing Compound (GO:1901701)	0.00182081	3.84117	24.2319	['DLG4', 'NEURL1', 'NSMF', 'VIM', 'ADCY1', 'HCN2', 'AQP1', 'TGM2']	0.0315056	0	0
56	57	Cell Junction Assembly (GO:0034329)	0.00187782	8.21024	51.541	['CDH5', 'CLDN5', 'FN1', 'SHANK3']	0.0315056	0	0
57	58	Positive Regulation Of Neuron Migration (GO:2001224)	0.00190845	36.8148	230.515	['ZNF609', 'NSMF']	0.0315056	0	0
58	59	Myelination In Peripheral Nervous System (GO:0022011)	0.00190845	36.8148	230.515	['SKI', 'PARD3']	0.0315056	0	0
59	60	Cellular Response To Transforming Growth Factor Beta Stimulus (GO:0071560)	0.00195127	8.12059	50.6666	['SKI', 'CDH5', 'CLDN5', 'PTK2']	0.0316756	0	0
60	61	Regulation Of Fibroblast Proliferation (GO:0048145)	0.00206897	12.9409	79.9838	['SKI', 'FN1', 'AQP1']	0.0330357	0	0
61	62	Protein Localization To Synapse (GO:0035418)	0.00224736	33.4663	204.078	['DLG4', 'SHANK1']	0.0353053	0	0
62	63	Heart Development (GO:0007507)	0.00256067	5.65806	33.7644	['APLNR', 'FN1', 'DZIP1', 'PCSK5', 'PTK2']	0.0385545	0	0
63	64	Positive Regulation Of Vasculature Development (GO:1904018)	0.00261182	7.46792	44.417	['SEMA5A', 'CDH5', 'APLNR', 'AQP1']	0.0385545	0	0
64	65	Blood Coagulation, Fibrin Clot Formation (GO:0072378)	0.00261252	30.6759	182.443	['GP1BB', 'FBLN1']	0.0385545	0	0
65	66	Protein Activation Cascade (GO:0072376)	0.00261252	30.6759	182.443	['GP1BB', 'FBLN1']	0.0385545	0	0
66	67	Cellular Response To Organonitrogen Compound (GO:0071417)	0.00270391	7.39361	43.7188	['NEURL1', 'NSMF', 'HCN2', 'AQP1']	0.0393076	0	0
67	68	Regulation Of Release Of Sequestered Calcium Ion Into Cytosol (GO:0051279)	0.00278246	11.59	68.2001	['JPH4', 'JPH3', 'APLNR']	0.0398547	0	0
68	69	Cellular Response To Salt (GO:1902075)	0.00309457	7.11051	41.0853	['DLG4', 'ADCY1', 'TGM2', 'PPP1R9B']	0.0432067	0	0
69	70	Negative Regulation Of Viral Genome Replication (GO:0045071)	0.0031052	11.1252	64.2446	['IFITM3', 'IFITM1', 'IFITM2']	0.0432067	0	0
70	71	Regulation Of Exocytosis (GO:0017157)	0.00327482	10.9065	62.4017	['SEPTIN5', 'STXBP6', 'CPLX2']	0.0444204	0	0
71	72	Regulation Of Cell Population Proliferation (GO:0042127)	0.0033016	2.81604	16.089	['SKI', 'CLDN5', 'IFITM1', 'ZNF609', 'NEURL1', 'FN1', 'IGFBP7', 'ADARB1', 'AGT', 'PTK2', 'PPP1R9B']	0.0444204	0	0
72	73	Regulation Of Establishment Of Endothelial Barrier (GO:1903140)	0.00342046	26.291	149.28	['CDH5', 'CLDN5']	0.0444204	0	0
73	74	Vasculature Development (GO:0001944)	0.00342046	26.291	149.28	['CDH5', 'APLNR']	0.0444204	0	0
74	75	Regulation Of Blood Vessel Endothelial Cell Proliferation Involved In Sprouting Angiogenesis (GO:1903587)	0.00342046	26.291	149.28	['PPP1R16B', 'APLNR']	0.0444204	0	0
75	76	Regulation Of Protein Phosphorylation (GO:0001932)	0.00347387	4.37281	24.761	['CDH5', 'FN1', 'PECAM1', 'FBLN1', 'NOP53', 'PTK2']	0.0445204	0	0
76	77	Positive Regulation Of Cellular Component Organization (GO:0051130)	0.00352214	6.84819	38.6833	['CDH5', 'AHNAK', 'NEURL1', 'SHANK3']	0.0445527	0	0
77	78	Postsynaptic Membrane Organization (GO:0001941)	0.00386265	24.537	136.338	['DLG4', 'SHANK3']	0.0482336	0	0

## Sheet: SO_GO_result
Unnamed: 0	Rank	Term name	P-value	Z-score	Combined score	Overlapping genes	Adjusted p-value	Old p-value	Old adjusted p-value
0	1	Myelination (GO:0042552)	3.21321e-10	18.0103	393.681	['ARHGEF10', 'NFASC', 'MYRF', 'PLLP', 'PLP1', 'PMP22', 'MAL', 'SOX10', 'SIRT2', 'KLK6', 'BCAS1']	6.57101e-07	0	0
1	2	Sphingolipid Metabolic Process (GO:0006665)	2.84119e-05	6.35944	66.575	['GLTP', 'ELOVL1', 'ABCA2', 'FA2H', 'GM2A', 'SPTLC2', 'ELOVL5', 'ENPP2', 'CERS2']	0.0268315	0	0
2	3	Lipid Transport (GO:0006869)	8.51432e-05	5.45622	51.1312	['GLTP', 'ABCA2', 'GM2A', 'ACSL1', 'NPC2', 'SLCO1A2', 'PMP2', 'ABCA8', 'PLTP']	0.0268315	0	0
3	4	Bleb Assembly (GO:0032060)	8.97244e-05	59.2229	551.884	['P2RX7', 'PMP22', 'MYLK']	0.0268315	0	0
4	5	Cellular Response To Corticosteroid Stimulus (GO:0071384)	9.11968e-05	21.5919	200.858	['ANXA1', 'FAM107A', 'ZFP36L2', 'ZFP36L1']	0.0268315	0	0
5	6	Central Nervous System Development (GO:0007417)	9.24484e-05	3.39267	31.514	['MARCKSL1', 'GSN', 'MYRF', 'MOG', 'CAPG', 'SYNJ2', 'S100B', 'SOX10', 'KLK6', 'C3', 'NFASC', 'DNER', 'MAL', 'APOD', 'PHGDH']	0.0268315	0	0
6	7	Membrane Organization (GO:0061024)	0.000122298	4.24579	38.2505	['GLTP', 'SYNGR2', 'NPC1', 'GCA', 'REEP3', 'CNTN2', 'PLAAT3', 'SYNJ2', 'S100A10', 'MTSS2', 'VAMP3']	0.0268315	0	0
7	8	Negative Regulation Of Axon Extension (GO:0030517)	0.000129236	11.903	106.578	['MAG', 'SEMA6A', 'SEMA4D', 'SEMA3B', 'DIP2B']	0.0268315	0	0
8	9	Regulation Of Cell Migration (GO:0030334)	0.000144381	2.789	24.6633	['PLEKHG3', 'CD74', 'SUN2', 'CLIC4', 'ANXA1', 'SEMA4D', 'IGFBP5', 'SEMA3B', 'FAM107A', 'FGF1', 'MYLK', 'DAAM2', 'DPYSL3', 'ENPP2', 'PLXNB3', 'PLXNB1', 'RFFL', 'SGK1', 'MAP4K4']	0.0268315	0	0
9	10	Cellular Response To Glucocorticoid Stimulus (GO:0071385)	0.000154852	18.2682	160.268	['FAM107A', 'ZFP36L2', 'AQP1', 'ZFP36L1']	0.0268315	0	0
10	11	Axon Ensheathment In Central Nervous System (GO:0032291)	0.000155068	44.4149	389.592	['MYRF', 'PLP1', 'SOX10']	0.0268315	0	0
11	12	Regulation Of Intracellular Signal Transduction (GO:1902531)	0.000157447	3.22191	28.2124	['PLEKHG3', 'ARHGEF10', 'PHLPP1', 'FGF1', 'MOB3B', 'HIPK2', 'ARHGAP23', 'PREX1', 'RASSF2', 'CAPN3', 'ARHGEF1', 'RHOU', 'SGK1', 'RFFL', 'MAP4K4']	0.0268315	0	0
12	13	Semaphorin-Plexin Signaling Pathway (GO:0071526)	0.000238879	10.2591	85.5567	['SEMA6A', 'SEMA4D', 'SEMA3B', 'PLXNB3', 'PLXNB1']	0.0358896	0	0
13	14	Actin Polymerization Or Depolymerization (GO:0008154)	0.000249818	7.61224	63.1418	['PREX1', 'GSN', 'WIPF1', 'CFL2', 'FAM107A', 'CAPG']	0.0358896	0	0
14	15	Regulation Of Cellular Component Organization (GO:0051128)	0.000263249	4.20054	34.6226	['ZFYVE16', 'RAP1A', 'HIP1', 'SEMA4D', 'FAM107A', 'STON2', 'SGK1', 'ERMN', 'AGT', 'GFAP']	0.0358896	0	0
15	16	Alpha-Linolenic Acid Metabolic Process (GO:0036109)	0.000362988	29.6069	234.521	['ELOVL1', 'ELOVL5', 'FADS1']	0.0463944	0	0

## Sheet: SR_GO_result
Unnamed: 0	Rank	Term name	P-value	Z-score	Combined score	Overlapping genes	Adjusted p-value	Old p-value	Old adjusted p-value
0	1	Regulation Of Cell Migration (GO:0030334)	1.09443e-08	3.77736	69.2406	['ITGB1', 'IFITM1', 'CLIC4', 'SEMA3B', 'FGF1', 'FGF2', 'VSIR', 'AMOT', 'CDH5', 'PODXL', 'DPYSL3', 'ENPP2', 'MAP4K4', 'PLEKHG3', 'PDGFRB', 'NTNG2', 'CD74', 'ANXA1', 'IGFBP5', 'VEGFA', 'BST2', 'TJP1', 'CLDN5', 'DAAM2', 'PLXNB3', 'PLXNB1', 'NF2', 'SGK1', 'FERMT2']	2.69887e-05	0	0
1	2	Regulation Of Intracellular Signal Transduction (GO:1902531)	2.59642e-08	4.38606	76.6094	['PLEKHG3', 'NTRK2', 'PHLPP1', 'VWF', 'CARD8', 'DAB2IP', 'FGF1', 'MOB3B', 'HIPK2', 'VEGFA', 'PREX2', 'NFKBIA', 'GNA13', 'PREX1', 'RASSF2', 'TRAF3', 'CAPN3', 'ARHGEF1', 'RHOU', 'NF2', 'SGK1', 'RAPGEF3', 'MAP4K4']	3.20138e-05	0	0
2	3	Regulation Of Cell Population Proliferation (GO:0042127)	6.02756e-08	2.86107	47.5634	['IFITM1', 'FOXO4', 'PTN', 'FGF1', 'FGF2', 'GNAI2', 'ZFP36L1', 'PPP1R9B', 'SLC9A3R1', 'ADGRG1', 'NACC2', 'S100A13', 'TSPO', 'IGFBP7', 'SOX9', 'TNS2', 'BOK', 'PDGFRB', 'NTRK2', 'EGLN3', 'DAB2IP', 'LIFR', 'GAB2', 'S100B', 'PLAAT4', 'AGT', 'POU3F3', 'VEGFA', 'SKI', 'TJP1', 'KAT2B', 'CLDN5', 'RGCC', 'NF2', 'NUPR1', 'IL6ST', 'SGK1', 'FGFR3', 'FGFR2']	4.95466e-05	0	0
3	4	Regulation Of Angiogenesis (GO:0045765)	1.34265e-07	4.98481	78.8769	['ITGB1', 'SEMA6A', 'GAB1', 'DAB2IP', 'VEGFB', 'FOXO4', 'FGF1', 'FGF2', 'AQP1', 'HIPK2', 'VEGFA', 'AMOT', 'CLDN5', 'CDH5', 'RGCC', 'ANGPTL4', 'GLUL', 'RAPGEF3']	8.27744e-05	0	0
4	5	Positive Regulation Of Intracellular Signal Transduction (GO:1902533)	1.95833e-07	3.19092	49.2869	['ITGB1', 'HIP1', 'LPAR1', 'FGF1', 'LITAF', 'FGF2', 'SOX2', 'SLC9A3R1', 'S100A13', 'SOX9', 'WLS', 'BOK', 'TGM2', 'PDGFRB', 'NTRK2', 'CD74', 'VWF', 'LAPTM5', 'DAB2IP', 'SEPTIN4', 'S100B', 'AGT', 'VEGFA', 'BST2', 'GPRC5B', 'PLXNB1', 'NUPR1', 'FGFR3', 'FERMT2', 'FGFR2']	9.65849e-05	0	0
5	6	Myelination (GO:0042552)	3.39546e-07	11.7596	175.167	['SKI', 'MYRF', 'PLLP', 'PLP1', 'PMP22', 'MAL', 'SOX10', 'KLK6', 'BCAS1']	0.000139553	0	0
6	7	Positive Regulation Of Angiogenesis (GO:0045766)	6.3565e-07	6.29377	89.8034	['ITGB1', 'S100A1', 'GAB1', 'VEGFB', 'FGF1', 'FGF2', 'AQP1', 'HIPK2', 'VEGFA', 'TJP1', 'CDH5', 'ANGPTL4', 'RAPGEF3']	0.000223931	0	0
7	8	Regulation Of Apoptotic Process (GO:0042981)	1.50717e-06	2.6727	35.8283	['ITGB1', 'PHLPP1', 'HIP1', 'RTKN', 'HTRA1', 'PSEN1', 'AQP1', 'RASSF2', 'BAG3', 'CAPN3', 'SOX9', 'BOK', 'MAP4K4', 'TGM2', 'CD74', 'EGLN3', 'ANXA1', 'ANXA5', 'DAB2IP', 'SEPTIN4', 'AGT', 'POU3F3', 'VEGFA', 'TJP1', 'CAT', 'MAP3K10', 'NSMF', 'ANGPTL4', 'NF2', 'ANP32B', 'NUPR1', 'IL6ST', 'SGK1', 'CRYAB']	0.000464584	0	0
8	9	Cellular Response To Copper Ion (GO:0071280)	1.70091e-06	21.6977	288.239	['MT2A', 'MT1F', 'MT1G', 'MT1X', 'AQP1', 'MT1E']	0.00046605	0	0
9	10	Positive Regulation Of Cell Migration (GO:0030335)	2.03147e-06	3.88626	50.9363	['PDGFRB', 'ITGB1', 'SEMA6A', 'SEMA3B', 'GAB1', 'DAB2IP', 'FGF1', 'VSIR', 'VEGFA', 'TJP1', 'CDH5', 'DAAM2', 'PODXL', 'ENPP2', 'NSMF', 'SOX9', 'DOCK1', 'FERMT2', 'MAP4K4']	0.000500961	0	0
10	11	Regulation Of Sprouting Angiogenesis (GO:1903670)	2.94745e-06	13.6575	173.923	['TJP1', 'SEMA6A', 'S100A1', 'FGF1', 'FGF2', 'GLUL', 'VEGFA']	0.000660764	0	0
11	12	Central Nervous System Development (GO:0007417)	3.63558e-06	3.72222	46.6198	['MARCKSL1', 'GSN', 'SHC3', 'MYRF', 'MOG', 'CAPG', 'MSI2', 'S100B', 'SOX10', 'POU3F3', 'KLK6', 'C3', 'ADGRG1', 'ATXN1', 'PITPNM1', 'MAL', 'APOD', 'SOX9', 'GIT1']	0.000747112	0	0
12	13	Response To Copper Ion (GO:0046688)	5.52609e-06	16.8725	204.259	['MT2A', 'MT1F', 'MT1G', 'MT1X', 'AQP1', 'MT1E']	0.00104773	0	0
13	14	Negative Regulation Of Signal Transduction (GO:0009968)	6.18636e-06	3.73166	44.7544	['WWOX', 'SEMA6A', 'IGFBP5', 'HHIP', 'CARD8', 'DAB2IP', 'ARRB1', 'APCDD1', 'FGF2', 'AGT', 'SLC9A3R1', 'PALM', 'TMBIM1', 'PIP4K2A', 'DACT3', 'APOD', 'TAX1BP3', 'TNS2']	0.00104773	0	0
14	15	Positive Regulation Of Vasculature Development (GO:1904018)	6.37306e-06	6.04217	72.285	['ITGB1', 'CDH5', 'GAB1', 'VEGFB', 'ANGPTL4', 'FGF1', 'FGF2', 'RAPGEF3', 'AQP1', 'HIPK2', 'VEGFA']	0.00104773	0	0
15	16	Cellular Response To Zinc Ion (GO:0071294)	7.29119e-06	25.2539	298.724	['MT2A', 'MT1F', 'MT1G', 'MT1X', 'MT1E']	0.00105765	0	0
16	17	Positive Regulation Of Sprouting Angiogenesis (GO:1903672)	7.29119e-06	25.2539	298.724	['TJP1', 'S100A1', 'FGF1', 'FGF2', 'VEGFA']	0.00105765	0	0
17	18	Regulation Of Neuron Projection Development (GO:0010975)	9.22203e-06	4.48974	52.0537	['SCARB2', 'NTNG2', 'NTRK2', 'LPAR1', 'DAB2IP', 'PSEN1', 'PTN', 'MAG', 'DPYSL3', 'NCS1', 'PLXNB3', 'DENND5A', 'APOE', 'SHANK3']	0.00126342	0	0
18	19	Regulation Of Canonical Wnt Signaling Pathway (GO:0060828)	1.56939e-05	4.01269	44.3893	['KREMEN1', 'DAB2IP', 'LRP4', 'PSEN1', 'SOX2', 'SLC9A3R1', 'GPRC5B', 'DAAM2', 'DACT3', 'SOX9', 'APOE', 'CSNK1G2', 'FGFR2', 'WLS', 'RNF220']	0.0020369	0	0
19	20	Memory (GO:0007613)	1.68147e-05	8.12758	89.3486	['ATXN1', 'PSEN1', 'PTN', 'APOE', 'SLC6A1', 'SGK1', 'SHANK3', 'SHANK1']	0.00204832	0	0
20	21	Nervous System Development (GO:0007399)	1.74431e-05	2.91055	31.8897	['MARCKSL1', 'GSN', 'SEMA6A', 'SHC3', 'MOG', 'LPAR1', 'CAPG', 'MSI2', 'PTN', 'S100B', 'SOX10', 'FGF2', 'POU3F3', 'VEGFA', 'KLK6', 'ATXN1', 'MOBP', 'BTBD2', 'DVL1', 'PMP22', 'MAL', 'ZNF358', 'SHANK3']	0.00204832	0	0
21	22	Learning (GO:0007612)	1.8774e-05	9.85874	107.293	['NTRK2', 'CLDN5', 'ATXN1', 'PTN', 'SLC6A1', 'SHANK3', 'SHANK1']	0.00210439	0	0
22	23	Negative Regulation Of Cell Population Proliferation (GO:0008285)	2.17746e-05	3.0353	32.5832	['IFITM1', 'IGFBP5', 'DAB2IP', 'FOXO4', 'PLAAT4', 'SOX2', 'SKI', 'KAT2B', 'SLC9A3R1', 'ADGRG1', 'RGCC', 'NACC2', 'APOD', 'IGFBP7', 'PLXNB1', 'SOX9', 'APOE', 'NUPR1', 'NF2', 'B2M', 'TNS2']	0.00233461	0	0
23	24	Negative Regulation Of Viral Life Cycle (GO:1903901)	3.4712e-05	16.8316	172.834	['IFITM3', 'BST2', 'IFITM1', 'GSN', 'IFITM2']	0.00342399	0	0
24	25	Positive Regulation Of Phospholipase Activity (GO:0010518)	3.4712e-05	16.8316	172.834	['PDGFRB', 'GNA13', 'FGF2', 'FGFR3', 'FGFR2']	0.00342399	0	0
25	26	Vascular Transport (GO:0010232)	3.63315e-05	6.18655	63.244	['SLC9A3R1', 'SLC27A1', 'SLC16A1', 'SLC44A1', 'SLCO2B1', 'SLC1A3', 'ATP1A2', 'LRP3', 'SLC6A1']	0.00344591	0	0
26	27	Transport Across Blood-Brain Barrier (GO:0150104)	4.39677e-05	6.02313	60.4244	['SLC9A3R1', 'SLC27A1', 'SLC16A1', 'SLC44A1', 'SLCO2B1', 'SLC1A3', 'ATP1A2', 'LRP3', 'SLC6A1']	0.00397698	0	0
27	28	Cellular Response To Vascular Endothelial Growth Factor Stimulus (GO:0035924)	4.6769e-05	10.8411	108.089	['SEMA6A', 'DAB2IP', 'GAB1', 'VEGFB', 'MT1G', 'VEGFA']	0.00397698	0	0
28	29	Glial Cell Differentiation (GO:0010001)	4.6769e-05	10.8411	108.089	['SOX2', 'MYRF', 'METRN', 'SOX9', 'SOX10', 'HAPLN2']	0.00397698	0	0
29	30	Positive Regulation Of Phosphorylation (GO:0042327)	5.61611e-05	3.56243	34.8665	['PDGFRB', 'CD74', 'NTRK2', 'FAXDC2', 'VEGFB', 'ARRB1', 'PSEN1', 'FGF1', 'FGF2', 'MOB3B', 'VEGFA', 'C3', 'SOX9', 'FGFR3', 'FGFR2']	0.00440411	0	0
30	31	Regulation Of Endothelial Cell Migration (GO:0010594)	5.79392e-05	5.79351	56.5222	['DAB2IP', 'PTN', 'APOE', 'FGF1', 'PLPP3', 'FGF2', 'GLUL', 'AGT', 'VEGFA']	0.00440411	0	0
31	32	Regulation Of Wnt Signaling Pathway (GO:0030111)	5.79493e-05	5.14492	50.1936	['SKI', 'WWOX', 'DAAM2', 'KREMEN1', 'DACT3', 'TAX1BP3', 'PSEN1', 'APCDD1', 'FGFR2', 'WLS']	0.00440411	0	0
32	33	Positive Regulation Of Actin Filament Bundle Assembly (GO:0032233)	5.89358e-05	8.06294	78.5255	['RGCC', 'LPAR1', 'NF2', 'SYNPO', 'SORBS3', 'RAPGEF3', 'FERMT2']	0.00440411	0	0
33	34	Negative Regulation Of Cell Cycle Phase Transition (GO:1901988)	6.41414e-05	25.1915	243.21	['SOX2', 'RGCC', 'ZFP36L2', 'ZFP36L1']	0.00462146	0	0
34	35	Negative Regulation Of Cellular Process (GO:0048523)	6.70523e-05	2.53362	24.3482	['IFITM1', 'FOXO4', 'PPP1R9B', 'SLC9A3R1', 'ADGRG1', 'PODXL', 'NACC2', 'DACT3', 'IGFBP7', 'TNS2', 'DAB2IP', 'PLAAT4', 'SKI', 'BST2', 'KAT2B', 'RGCC', 'TMEM98', 'PLXNB3', 'TXNIP', 'PLXNB1', 'NF2', 'ANP32B', 'NUPR1', 'CRYAB', 'VAMP3']	0.00462146	0	0
35	36	Negative Regulation Of Epithelial Cell Proliferation (GO:0050680)	6.74665e-05	6.55048	62.91	['SOX2', 'RGCC', 'DAB2IP', 'SOX9', 'NUPR1', 'APOE', 'B2M', 'FGFR2']	0.00462146	0	0
36	37	Cholesterol Efflux (GO:0033344)	7.17663e-05	14.0242	133.82	['NPC1', 'APOC1', 'ABCA8', 'APOE', 'ABCG1']	0.00470215	0	0
37	38	Epithelial Tube Formation (GO:0072175)	7.31171e-05	75.4038	718.105	['PODXL', 'SOX9', 'FGFR2']	0.00470215	0	0
38	39	Cellular Response To Metal Ion (GO:0071248)	7.4365e-05	4.52443	43.0116	['MT2A', 'CLIC4', 'NEK7', 'MT1F', 'CAPN3', 'MT1G', 'MT1X', 'B2M', 'F3', 'AQP1', 'MT1E']	0.00470215	0	0
39	40	Cellular Response To Hypoxia (GO:0071456)	8.26696e-05	6.34513	59.6484	['EGLN3', 'RGCC', 'EPAS1', 'NDRG1', 'AQP1', 'ZFP36L1', 'HIPK2', 'VEGFA']	0.00509658	0	0
40	41	Regulation Of Cytoskeleton Organization (GO:0051493)	8.48205e-05	4.89631	45.9028	['PDGFRB', 'BST2', 'TJP1', 'PHLDB1', 'CLIC4', 'DAAM2', 'CAPN2', 'PLXNB1', 'SORBS3', 'RAPGEF3']	0.00510164	0	0
41	42	Negative Regulation Of Apoptotic Process (GO:0043066)	9.07091e-05	2.5932	24.1372	['ITGB1', 'NTRK2', 'CD74', 'ANXA1', 'ANXA5', 'AGAP2', 'PSEN1', 'POU3F3', 'AQP1', 'VEGFA', 'TJP1', 'MAG', 'BAG3', 'TMBIM1', 'CAT', 'CAPN3', 'ANGPTL4', 'SOX9', 'APOE', 'NUPR1', 'IL6ST', 'CRYAB', 'MAP4K4']	0.00523451	0	0
42	43	Cellular Response To Decreased Oxygen Levels (GO:0036294)	9.12749e-05	6.24719	58.1091	['EGLN3', 'RGCC', 'EPAS1', 'NDRG1', 'AQP1', 'ZFP36L1', 'HIPK2', 'VEGFA']	0.00523451	0	0
43	44	Negative Regulation Of Cell Migration (GO:0030336)	9.46912e-05	4.05819	37.5987	['BST2', 'CLDN5', 'CD74', 'IFITM1', 'ADGRG1', 'CLIC4', 'IGFBP5', 'DPYSL3', 'PLXNB3', 'DAB2IP', 'NF2', 'FGF2']	0.00530701	0	0
44	45	Negative Regulation Of Wnt Signaling Pathway (GO:0030178)	0.000103248	4.34794	39.9071	['SOX2', 'SLC9A3R1', 'WWOX', 'KREMEN1', 'DAB2IP', 'DACT3', 'LRP4', 'TAX1BP3', 'SOX9', 'APOE', 'APCDD1']	0.005433	0	0
45	46	Regulation Of Receptor-Mediated Endocytosis (GO:0048259)	0.00010444	9.19615	84.3002	['C3', 'HIP1', 'TNK2', 'APOC1', 'B2M', 'F3']	0.005433	0	0
46	47	Positive Regulation Of Epithelial Cell Migration (GO:0010634)	0.000105626	5.32004	48.7082	['ENPP2', 'SOX9', 'FGF1', 'PLPP3', 'FGF2', 'DOCK1', 'AGT', 'MAP4K4', 'VEGFA']	0.005433	0	0
47	48	Response To Zinc Ion (GO:0010043)	0.00010971	12.6205	115.069	['MT2A', 'MT1F', 'MT1G', 'MT1X', 'MT1E']	0.005433	0	0
48	49	Regulation Of Stress Fiber Assembly (GO:0051492)	0.000110719	6.06009	55.1984	['TJP1', 'RGCC', 'LPAR1', 'NF2', 'WASF2', 'SORBS3', 'RAPGEF3', 'FERMT2']	0.005433	0	0
49	50	Positive Regulation Of Neurogenesis (GO:0050769)	0.000110719	6.06009	55.1984	['NTRK2', 'METRN', 'PLXNB3', 'PLXNB1', 'SHANK3', 'HAPLN2', 'TGM2', 'VEGFA']	0.005433	0	0
50	51	Positive Regulation Of Cell Projection Organization (GO:0031346)	0.000113319	4.714	42.8281	['SCARB2', 'NTRK2', 'METRN', 'DPYSL3', 'DVL1', 'PLXNB3', 'DAB2IP', 'PLXNB1', 'APOE', 'PTN']	0.005433	0	0
51	52	Cellular Response To Transforming Growth Factor Beta Stimulus (GO:0071560)	0.000114565	5.25862	47.7187	['ITGB1', 'SKI', 'CDH5', 'CLDN5', 'WWOX', 'SOX9', 'ZFP36L2', 'FERMT2', 'ZFP36L1']	0.005433	0	0
52	53	Positive Regulation Of Macromolecule Metabolic Process (GO:0010604)	0.000117427	2.83638	25.6684	['CD74', 'NTRK2', 'GSN', 'LAPTM5', 'LRP3', 'PSEN1', 'FGF1', 'FGF2', 'VSIR', 'AGT', 'POU3F3', 'VEGFA', 'NFKBIA', 'CLDN5', 'CDH5', 'RGCC', 'SOX9', 'VAMP3', 'NFE2L2']	0.00546368	0	0
53	54	Positive Regulation Of Transferase Activity (GO:0051347)	0.000124802	4.24847	38.1886	['PDGFRB', 'CD74', 'NTRK2', 'NEK7', 'TSPO', 'APOE', 'FGFR3', 'PLAAT4', 'FGFR2', 'SERINC5', 'AGT']	0.00569928	0	0
54	55	Neuron Projection Morphogenesis (GO:0048812)	0.000150074	4.15342	36.5683	['NTNG2', 'DVL1', 'DAB2IP', 'LRP4', 'PLXNB1', 'SGK1', 'S100B', 'SHANK3', 'FGFR2', 'SHANK1', 'MAP4K4']	0.00672876	0	0
55	56	Positive Regulation Of Protein Modification Process (GO:0031401)	0.000154905	3.39562	29.7887	['CD74', 'NTRK2', 'FAXDC2', 'VEGFB', 'PPP2R5A', 'ARRB1', 'FGF1', 'FGF2', 'MOB3B', 'VEGFA', 'C3', 'CDH5', 'NSMF', 'SOX9']	0.00682134	0	0
56	57	Positive Regulation Of Receptor-Mediated Endocytosis (GO:0048260)	0.000182662	8.20029	70.5871	['C3', 'HIP1', 'ARRB1', 'B2M', 'F3', 'VEGFA']	0.0076358	0	0
57	58	Positive Regulation Of Stress Fiber Assembly (GO:0051496)	0.000182662	8.20029	70.5871	['RGCC', 'LPAR1', 'NF2', 'SORBS3', 'FERMT2', 'RAPGEF3']	0.0076358	0	0
58	59	Response To Cytokine (GO:0034097)	0.000182689	4.42547	38.0933	['IFITM3', 'BST2', 'CD74', 'IFITM1', 'IFITM2', 'ANXA1', 'DPYSL3', 'TIMP3', 'LIFR', 'IL6ST']	0.0076358	0	0
59	60	Cellular Response To Organonitrogen Compound (GO:0071417)	0.000227477	4.76343	39.9578	['IGFBP5', 'CAPN2', 'CTNNA1', 'NSMF', 'SOX9', 'RAPGEF3', 'HCN2', 'AQP1', 'ZFP36L1']	0.00934932	0	0
60	61	Positive Regulation Of Cell Population Proliferation (GO:0008284)	0.00024733	2.46278	20.4529	['PDGFRB', 'NTRK2', 'CD74', 'LIFR', 'GAB2', 'PTN', 'FGF1', 'S100B', 'FGF2', 'AGT', 'POU3F3', 'AQP1', 'VEGFA', 'GNAI2', 'BST2', 'TJP1', 'CLDN5', 'S100A13', 'SOX9', 'IL6ST', 'FGFR3', 'FGFR2']	0.00988381	0	0
61	62	Axon Ensheathment In Central Nervous System (GO:0032291)	0.000248498	37.6981	312.897	['MYRF', 'PLP1', 'SOX10']	0.00988381	0	0
62	63	Regulation Of Protein Phosphorylation (GO:0001932)	0.000256403	3.07254	25.4061	['CD74', 'NTRK2', 'FAXDC2', 'DAB2IP', 'VEGFB', 'ARRB1', 'FGF1', 'FGF2', 'MOB3B', 'VEGFA', 'C3', 'CDH5', 'SLC9A3R1', 'SOX9', 'PLPP3']	0.0100364	0	0
63	64	Regulation Of Osteoblast Differentiation (GO:0045667)	0.000266399	5.27037	43.3778	['SKI', 'IFITM1', 'RANBP3L', 'LRP3', 'SOX9', 'IL6ST', 'FERMT2', 'FGFR2']	0.0102647	0	0
64	65	Amyloid Precursor Protein Metabolic Process (GO:0042982)	0.000285279	15.4985	126.5	['TMCC2', 'PSEN1', 'APOE', 'KLK6']	0.0106591	0	0
65	66	Response To Interferon-Alpha (GO:0035455)	0.000285279	15.4985	126.5	['IFITM3', 'BST2', 'IFITM1', 'IFITM2']	0.0106591	0	0
66	67	Positive Regulation Of Cellular Process (GO:0048522)	0.000317451	2.27301	18.3095	['MYRF', 'PTN', 'FGF1', 'FGF2', 'GNAI2', 'ZFP36L1', 'ADGRG1', 'S100A13', 'SOX9', 'TGM2', 'PDGFRB', 'NTRK2', 'CAVIN1', 'LAMB2', 'LIFR', 'GAB2', 'S100B', 'POU3F3', 'VEGFA', 'TJP1', 'CLDN5', 'NUPR1', 'IL6ST', 'FGFR3', 'FGFR2']	0.0115495	0	0
67	68	Cellular Response To cAMP (GO:0071320)	0.000318477	9.7051	78.145	['IGFBP5', 'HCN2', 'RAPGEF3', 'AQP1', 'ZFP36L1']	0.0115495	0	0
68	69	Regulation Of ERK1 And ERK2 Cascade (GO:0070372)	0.000356221	3.11206	24.7096	['PDGFRB', 'CD74', 'NTRK2', 'SEMA6A', 'DAB2IP', 'ARRB1', 'FGF1', 'FGF2', 'SLC9A3R1', 'TIMP3', 'APOE', 'FGFR3', 'FERMT2', 'FGFR2']	0.0123686	0	0
69	70	Regulation Of Oligodendrocyte Differentiation (GO:0048713)	0.000361127	14.3907	114.065	['TMEM98', 'OPALIN', 'DAAM2', 'PTN']	0.0123686	0	0
70	71	Negative Regulation Of Viral Entry Into Host Cell (GO:0046597)	0.000361127	14.3907	114.065	['IFITM3', 'IFITM1', 'GSN', 'IFITM2']	0.0123686	0	0
71	72	Positive Regulation Of Focal Adhesion Assembly (GO:0051894)	0.000361127	14.3907	114.065	['COL16A1', 'FERMT2', 'VEGFA', 'MAP4K4']	0.0123686	0	0
72	73	Synapse Pruning (GO:0098883)	0.000391805	30.1569	236.573	['C1QB', 'C3', 'C1QC']	0.0131348	0	0
73	74	Regulation Of Phosphatidylinositol 3-Kinase Signaling (GO:0014066)	0.00039415	4.94774	38.7842	['PDGFRB', 'SLC9A3R1', 'NTRK2', 'DAB2IP', 'PLXNB1', 'SOX9', 'FGF2', 'RAPGEF3']	0.0131348	0	0
74	75	Regulation Of Epithelial Cell Migration (GO:0010632)	0.000424167	6.89323	53.5286	['ENPP2', 'DAB2IP', 'SOX9', 'PTN', 'GLUL', 'DOCK1']	0.0137858	0	0
75	76	Regulation Of Epithelial Cell Proliferation (GO:0050678)	0.000424866	4.88787	37.9482	['SOX2', 'DAB2IP', 'SOX9', 'NUPR1', 'B2M', 'FGFR2', 'ZFP36L1', 'VEGFA']	0.0137858	0	0
76	77	Regulation Of G Protein-Coupled Receptor Signaling Pathway (GO:0008277)	0.000443422	5.62579	43.4367	['C3', 'RGS5', 'GNG7', 'RGS12', 'GIT1', 'PPP1R9B', 'KLK6']	0.014201	0	0
77	78	Positive Regulation Of Cell Motility (GO:2000147)	0.000453212	3.19062	24.5651	['PDGFRB', 'ITGB1', 'CAVIN1', 'SEMA3B', 'FGF1', 'VSIR', 'VEGFA', 'TJP1', 'CDH5', 'DAAM2', 'PODXL', 'FERMT2', 'MAP4K4']	0.0143285	0	0
78	79	Cell-Cell Junction Assembly (GO:0007043)	0.000483746	5.53761	42.2738	['CLDN11', 'TJP1', 'CDH5', 'CLDN5', 'CTNNA1', 'CD9', 'TLN1']	0.0151002	0	0
79	80	Negative Regulation Of Catabolic Process (GO:0009895)	0.000526939	5.45213	41.155	['CST3', 'APOC1', 'AGAP2', 'DAB2IP', 'NUPR1', 'GIT1', 'HIPK2']	0.016101	0	0
80	81	Sphingolipid Metabolic Process (GO:0006665)	0.000528865	4.71664	35.586	['GLTP', 'ELOVL1', 'ABCA2', 'FA2H', 'ENPP2', 'PLPP3', 'CSNK1G2', 'CERS2']	0.016101	0	0
81	82	Actin Filament Organization (GO:0007015)	0.000569199	3.79428	28.3481	['SAMD14', 'MARCKSL1', 'HIP1', 'GSN', 'WIPF1', 'DPYSL3', 'CAPG', 'ERMN', 'CNN3', 'PPP1R9B']	0.016924	0	0
82	83	Dendrite Morphogenesis (GO:0048813)	0.000570534	8.40936	62.809	['DVL1', 'LRP4', 'PTN', 'SHANK3', 'SHANK1']	0.016924	0	0
83	84	Regulation Of Postsynaptic Neurotransmitter Receptor Activity (GO:0098962)	0.000579153	25.1295	187.314	['DLGAP3', 'BEGAIN', 'DLGAP4']	0.016924	0	0
84	85	Negative Regulation Of Programmed Cell Death (GO:0043069)	0.000583348	2.54466	18.9494	['CD74', 'ANXA1', 'ANXA5', 'LAPTM5', 'PSEN1', 'POU3F3', 'AQP1', 'VEGFA', 'TJP1', 'BAG3', 'CAT', 'CAPN3', 'SOX9', 'ANGPTL4', 'NUPR1', 'IL6ST', 'CRYAB', 'MAP4K4']	0.016924	0	0
85	86	Positive Regulation Of Supramolecular Fiber Organization (GO:1902905)	0.000608985	4.60897	34.1235	['FCHSD2', 'GSN', 'CDC42EP4', 'CDC42EP1', 'PSEN1', 'SLAIN1', 'APOE', 'SYNPO']	0.0174623	0	0
86	87	Regulation Of Focal Adhesion Assembly (GO:0051893)	0.00064544	6.31751	46.4057	['COL16A1', 'APOD', 'TLN1', 'FERMT2', 'MAP4K4', 'VEGFA']	0.018087	0	0
87	88	Negative Regulation Of Neuron Projection Development (GO:0010977)	0.00064544	6.31751	46.4057	['MAG', 'DPYSL3', 'LPAR1', 'LRP4', 'DENND5A', 'APOE']	0.018087	0	0
88	89	Response To Cadmium Ion (GO:0046686)	0.000674161	11.8494	86.5247	['MT1F', 'MT1G', 'MT1X', 'MT1E']	0.0186796	0	0
89	90	Cellular Response To Fibroblast Growth Factor Stimulus (GO:0044344)	0.000712649	6.18826	44.8434	['FGF1', 'FGF2', 'FGFR3', 'ZFP36L2', 'FGFR2', 'ZFP36L1']	0.0191666	0	0
90	91	Phosphatidylcholine Metabolic Process (GO:0046470)	0.000712649	6.18826	44.8434	['SLC27A1', 'SLC44A1', 'ENPP2', 'TSPO', 'PLAAT3', 'PLAAT4']	0.0191666	0	0
91	92	Regulation Of I-kappaB kinase/NF-kappaB Signaling (GO:0043122)	0.000715056	3.02865	21.9369	['CD74', 'CARD8', 'LPAR1', 'DAB2IP', 'OTUD7B', 'S100B', 'LITAF', 'BST2', 'GPRC5B', 'TRAF3', 'S100A13', 'CAPN3', 'WLS']	0.0191666	0	0
92	93	Regulation Of Cellular Component Biogenesis (GO:0044087)	0.000741842	7.88297	56.8077	['TJP1', 'DAB2IP', 'APOE', 'NF2', 'GFAP']	0.0194995	0	0
93	94	Regulation Of MAPK Cascade (GO:0043408)	0.000743291	3.18488	22.9452	['SOX2', 'CD74', 'NTRK2', 'PHLPP1', 'LPAR1', 'DAB2IP', 'LAPTM5', 'DUSP8', 'FGF2', 'FGFR3', 'FGFR2', 'MAP4K4']	0.0194995	0	0
94	95	Negative Regulation Of Growth (GO:0045926)	0.000775566	3.97255	28.4511	['BST2', 'MT2A', 'MT1F', 'MT1G', 'DACT3', 'MT1X', 'FGFR3', 'MT1E', 'PPP1R9B']	0.020132	0	0
95	96	Cellular Response To Cadmium Ion (GO:0071276)	0.000811291	11.1905	79.6416	['MT1F', 'MT1G', 'MT1X', 'MT1E']	0.0205164	0	0
96	97	Acidic Amino Acid Transport (GO:0015800)	0.000815331	21.5385	153.18	['SLC9A3R1', 'SLC1A3', 'SLC6A1']	0.0205164	0	0
97	98	Positive Regulation Of Actin Nucleation (GO:0051127)	0.000815331	21.5385	153.18	['FCHSD2', 'GSN', 'WASF2']	0.0205164	0	0
98	99	Positive Regulation Of Signal Transduction (GO:0009967)	0.000836312	2.83714	20.1054	['CD74', 'VWF', 'LAMB2', 'DAB2IP', 'FGF1', 'KLK6', 'VEGFA', 'C3', 'SKI', 'IL6ST', 'SHANK3', 'FGFR2', 'WLS', 'SHANK1']	0.0207299	0	0
99	100	Response To cAMP (GO:0051591)	0.000840629	7.64371	54.1278	['IGFBP5', 'HCN2', 'RAPGEF3', 'AQP1', 'ZFP36L1']	0.0207299	0	0
100	101	Positive Regulation Of Intrinsic Apoptotic Signaling Pathway (GO:2001244)	0.000948893	7.41851	51.6344	['SLC9A3R1', 'NACC2', 'SEPTIN4', 'NUPR1', 'BOK']	0.0231512	0	0
101	102	Regulation Of Cholesterol Transport (GO:0032374)	0.000966981	10.601	73.5851	['ABCA2', 'APOC1', 'TSPO', 'ABCA8']	0.0231512	0	0
102	103	Positive Regulation Of Cell-Substrate Junction Organization (GO:0150117)	0.000966981	10.601	73.5851	['COL16A1', 'FERMT2', 'VEGFA', 'MAP4K4']	0.0231512	0	0
103	104	Regulation Of Neuron Apoptotic Process (GO:0043523)	0.00109947	4.17941	28.474	['NTRK2', 'MAG', 'EGLN3', 'AGAP2', 'NSMF', 'NUPR1', 'APOE', 'IL6ST']	0.0254619	0	0
104	105	Central Nervous System Myelination (GO:0022010)	0.00110479	18.8452	128.3	['MYRF', 'PLP1', 'SOX10']	0.0254619	0	0
105	106	Negative Regulation Of Vascular Permeability (GO:0043116)	0.00110479	18.8452	128.3	['CLDN5', 'FERMT2', 'VEGFA']	0.0254619	0	0
106	107	Phospholipid Efflux (GO:0033700)	0.00110479	18.8452	128.3	['APOC1', 'APOE', 'ABCG1']	0.0254619	0	0
107	108	Gliogenesis (GO:0042063)	0.00114254	10.0704	68.2222	['ANXA1', 'METRN', 'CD9', 'HAPLN2']	0.026088	0	0
108	109	Positive Regulation Of Cell Junction Assembly (GO:1901890)	0.0012368	5.51149	36.9007	['CLDN5', 'COL16A1', 'AGT', 'FERMT2', 'MAP4K4', 'VEGFA']	0.0279811	0	0
109	110	Negative Regulation Of Cell Motility (GO:2000146)	0.0012753	3.68252	24.5424	['BST2', 'CLDN5', 'CD74', 'IFITM1', 'CLIC4', 'IGFBP5', 'DPYSL3', 'PLXNB3', 'NF2']	0.02859	0	0
110	111	Positive Regulation Of MAPK Cascade (GO:0043410)	0.00129313	2.59779	17.2771	['PDGFRB', 'CD74', 'NTRK2', 'LPAR1', 'DAB2IP', 'LAPTM5', 'ARRB1', 'FGF1', 'FGF2', 'VEGFA', 'SOX2', 'APOE', 'FGFR3', 'FERMT2', 'FGFR2']	0.0286358	0	0
111	112	Lipid Transport (GO:0006869)	0.00131948	4.0534	26.8762	['GLTP', 'ABCA2', 'SLC27A1', 'PITPNM1', 'SLCO2B1', 'SLCO1A2', 'APOE', 'ABCA8']	0.0286358	0	0
112	113	Regulation Of Axonogenesis (GO:0050770)	0.0013361	6.81597	45.1081	['NTRK2', 'METRN', 'PLXNB3', 'LRP4', 'PLXNB1']	0.0286358	0	0
113	114	Regulation Of Myelination (GO:0031641)	0.00133927	9.5904	63.4466	['NKX6-2', 'MYRF', 'TMEM98', 'PTN']	0.0286358	0	0
114	115	Cell Junction Organization (GO:0034330)	0.00134702	5.41279	35.7778	['TJP1', 'AJM1', 'DVL1', 'LRP4', 'PSEN1', 'SLC6A1']	0.0286358	0	0
115	116	Positive Regulation Of Apoptotic Signaling Pathway (GO:2001235)	0.00134702	5.41279	35.7778	['SLC9A3R1', 'WWOX', 'DAB2IP', 'NUPR1', 'SEPTIN4', 'BOK']	0.0286358	0	0
116	117	Positive Regulation Of Gene Expression (GO:0010628)	0.00139487	2.23185	14.6743	['NTRK2', 'CD74', 'GSN', 'LRP3', 'PSEN1', 'EEF2', 'FGF1', 'FGF2', 'VSIR', 'AGT', 'POU3F3', 'VEGFA', 'KAT2B', 'CDH5', 'CLDN5', 'RGCC', 'S100A13', 'VIM', 'SOX9', 'NFE2L2']	0.0293995	0	0
117	118	Integrin-Mediated Signaling Pathway (GO:0007229)	0.00142068	4.54042	29.7698	['ITGB1', 'COL16A1', 'ITGB4', 'PTN', 'PLPP3', 'DOCK1', 'FERMT2']	0.0296898	0	0
118	119	Positive Regulation Of Neuron Migration (GO:2001224)	0.00145168	16.7504	109.465	['SEMA6A', 'DAB2IP', 'NSMF']	0.0300827	0	0
119	120	Skeletal System Morphogenesis (GO:0048705)	0.00148787	6.63626	43.2048	['SKI', 'WWOX', 'HHIP', 'FGFR3', 'FGFR2']	0.0305758	0	0
120	121	Neuron Projection Development (GO:0031175)	0.00150894	3.09054	20.0772	['SAMD14', 'RAB13', 'DAB2IP', 'PLP1', 'PLXNB1', 'APOE', 'SGK1', 'SHANK3', 'PPP1R9B', 'SHANK1', 'MAP4K4']	0.0307524	0	0
121	122	Protein Targeting To Lysosome (GO:0006622)	0.00155847	9.15401	59.172	['SCARB2', 'PXK', 'LAMP2', 'LAPTM5']	0.0313048	0	0
122	123	Supramolecular Fiber Organization (GO:0097435)	0.00156143	2.54522	16.4476	['MARCKSL1', 'HIP1', 'GSN', 'SLAIN1', 'ERMN', 'CNN3', 'GFAP', 'PPP1R9B', 'CST3', 'SAMD14', 'TPPP3', 'CAPN3', 'VIM', 'B2M', 'NCKAP5']	0.0313048	0	0
123	124	Bone Development (GO:0060348)	0.00165195	6.46577	41.4184	['SKI', 'RANBP3L', 'FGFR3', 'FGFR2', 'TGM2']	0.0325897	0	0
124	125	Regulation Of Viral Entry Into Host Cell (GO:0046596)	0.00165195	6.46577	41.4184	['IFITM3', 'CD74', 'IFITM1', 'IFITM2', 'GSN']	0.0325897	0	0
125	126	Regulation Of Programmed Cell Death (GO:0043067)	0.00170678	3.03968	19.3723	['HIP1', 'PHLPP1', 'RTKN', 'SOX9', 'ANP32B', 'SEPTIN4', 'NF2', 'SGK1', 'CRYAB', 'AGT', 'TGM2']	0.0334041	0	0
126	127	Positive Regulation Of Cellular Component Organization (GO:0051130)	0.00176269	3.85939	24.4721	['CDH5', 'AHNAK', 'DAB2IP', 'LRP4', 'APOE', 'SHANK3', 'RAPGEF3', 'VEGFA']	0.0342267	0	0
127	128	Negative Regulation Of Canonical Wnt Signaling Pathway (GO:0090090)	0.00186399	3.82279	24.0264	['SOX2', 'SLC9A3R1', 'KREMEN1', 'DAB2IP', 'DACT3', 'LRP4', 'SOX9', 'APOE']	0.0359109	0	0
128	129	Activation Of Cysteine-Type Endopeptidase Activity Involved In Apoptotic Process (GO:0006919)	0.00201462	4.96785	30.837	['EGLN3', 'HIP1', 'CARD8', 'LAPTM5', 'ANP32B', 'BOK']	0.0385121	0	0
129	130	Negative Regulation Of Actin Filament Bundle Assembly (GO:0032232)	0.00206946	8.39032	51.8561	['TJP1', 'WASF2', 'SHANK3', 'SHANK1']	0.0392561	0	0
130	131	Positive Regulation Of Protein Serine/Threonine Kinase Activity (GO:0071902)	0.00219568	3.717	22.7527	['PDGFRB', 'SLC27A1', 'RGCC', 'DAB2IP', 'FGF1', 'FGF2', 'FERMT2', 'VEGFA']	0.0413325	0	0
131	132	Positive Regulation Of Neuron Projection Development (GO:0010976)	0.00224387	4.16501	25.4047	['SCARB2', 'NTRK2', 'DPYSL3', 'DAB2IP', 'PLXNB3', 'PTN', 'APOE']	0.0419195	0	0
132	133	Positive Regulation Of Developmental Process (GO:0051094)	0.00230535	2.76282	16.7773	['PHLDB1', 'DVL1', 'DAB2IP', 'ENPP2', 'SOX9', 'APOE', 'PTN', 'PSEN1', 'SHANK3', 'RAPGEF3', 'VEGFA', 'SHANK1']	0.0419361	0	0
133	134	Bone Morphogenesis (GO:0060349)	0.00233276	13.7035	83.0528	['SKI', 'FGFR3', 'FGFR2']	0.0419361	0	0
134	135	Vascular Endothelial Growth Factor Signaling Pathway (GO:0038084)	0.00233276	13.7035	83.0528	['GAB1', 'VEGFB', 'VEGFA']	0.0419361	0	0
135	136	Regulation Of Neuron Migration (GO:2001222)	0.00236379	8.05429	48.7082	['NTNG2', 'SEMA6A', 'DAB2IP', 'NSMF']	0.0419361	0	0
136	137	Response To Interferon-Beta (GO:0035456)	0.00236379	8.05429	48.7082	['IFITM3', 'BST2', 'IFITM1', 'IFITM2']	0.0419361	0	0
137	138	Maintenance Of Blood-Brain Barrier (GO:0035633)	0.00236379	8.05429	48.7082	['ITGB1', 'TJP1', 'CDH5', 'CLDN5']	0.0419361	0	0
138	139	Morphogenesis Of An Epithelium (GO:0002009)	0.00236379	8.05429	48.7082	['SLC9A3R1', 'SOX9', 'SOX10', 'FGFR2']	0.0419361	0	0
139	140	Regulation Of Protein-Containing Complex Assembly (GO:0043254)	0.00244139	3.64965	21.9534	['CDH5', 'GSN', 'DAB2IP', 'APOE', 'SEPTIN9', 'CRYAB', 'GFAP', 'VEGFA']	0.0430034	0	0
140	141	Negative Regulation Of Axon Extension (GO:0030517)	0.00268569	7.74412	45.8438	['MAG', 'SEMA6A', 'SEMA3B', 'DIP2B']	0.0466403	0	0
141	142	Regulation Of Cell Migration Involved In Sprouting Angiogenesis (GO:0090049)	0.00268569	7.74412	45.8438	['HDAC5', 'ANXA1', 'FGF2', 'VEGFA']	0.0466403	0	0
142	143	Negative Regulation Of Cell Differentiation (GO:0045596)	0.00272113	2.85181	16.8448	['SOX2', 'SKI', 'NFKBIA', 'RANBP3L', 'DAB2IP', 'LRP3', 'SOX9', 'ANP32B', 'FERMT2', 'ABCG1', 'ZFP36L2']	0.0469253	0	0
143	144	Regulation Of Protein Metabolic Process (GO:0051246)	0.00285634	3.977	23.2981	['NFKBIA', 'TRAF3', 'RHOBTB3', 'MSI2', 'APOE', 'CNDP1', 'AGT']	0.0478192	0	0
144	145	Regulation Of Cholesterol Biosynthetic Process (GO:0045540)	0.00287376	12.5609	73.5081	['APOE', 'FGF1', 'ABCG1']	0.0478192	0	0
145	146	Cellular Response To Corticosteroid Stimulus (GO:0071384)	0.00287376	12.5609	73.5081	['ANXA1', 'ZFP36L2', 'ZFP36L1']	0.0478192	0	0
146	147	High-Density Lipoprotein Particle Remodeling (GO:0034375)	0.00287376	12.5609	73.5081	['APOC1', 'APOE', 'ABCG1']	0.0478192	0	0
147	148	Positive Regulation Of ERK1 And ERK2 Cascade (GO:0070374)	0.00292616	3.00307	17.5201	['PDGFRB', 'CD74', 'NTRK2', 'ARRB1', 'APOE', 'FGF1', 'FGF2', 'FGFR3', 'FERMT2', 'FGFR2']	0.0478192	0	0
148	149	Cell Chemotaxis (GO:0060326)	0.0029281	5.60195	32.6784	['PDGFRB', 'RAB13', 'LPAR1', 'PLXNB3', 'VEGFA']	0.0478192	0	0
149	150	Negative Regulation Of Cell Projection Organization (GO:0031345)	0.0029281	5.60195	32.6784	['MAG', 'DPYSL3', 'LPAR1', 'DENND5A', 'APOE']	0.0478192	0	0
150	151	Positive Regulation Of Transport (GO:0051050)	0.0029281	5.60195	32.6784	['ANXA1', 'DOC2B', 'APOE', 'SGK1', 'BOK']	0.0478192	0	0
151	152	Organonitrogen Compound Biosynthetic Process (GO:1901566)	0.00299712	3.52199	20.4631	['FA2H', 'ELOVL1', 'SLC27A1', 'SLC44A1', 'APOE', 'PLPP3', 'CSNK1G2', 'CERS2']	0.0483065	0	0
152	153	Regulation Of Cell Motility (GO:2000145)	0.00299712	3.52199	20.4631	['PLEKHG3', 'CAVIN1', 'ENPP2', 'PLXNB1', 'FGF1', 'SGK1', 'FGF2', 'AMOT']	0.0483065	0	0
153	154	Enzyme-Linked Receptor Protein Signaling Pathway (GO:0007167)	0.00315033	3.49145	20.1116	['PDGFRB', 'NTRK2', 'SHC3', 'LIFR', 'PTN', 'IL6ST', 'FGFR3', 'FGFR2']	0.0493615	0	0
154	155	Cellular Response To Organic Cyclic Compound (GO:0071407)	0.00317869	3.19012	18.3473	['IGFBP5', 'CTNNA1', 'SPP1', 'ATP1A2', 'RAPGEF3', 'HCN2', 'AQP1', 'TGM2', 'ZFP36L1']	0.0493615	0	0
155	156	Cholesterol Transport (GO:0030301)	0.00319498	5.47989	31.4884	['NPC1', 'APOC1', 'APOE', 'ABCA8', 'ABCG1']	0.0493615	0	0
156	157	MAPK Cascade (GO:0000165)	0.0032069	3.8892	22.3335	['ZDHHC9', 'SOX9', 'FGFR3', 'SHANK3', 'ZFP36L2', 'ZFP36L1', 'MAP4K4']	0.0493615	0	0
157	158	Positive Regulation Of Protein-Containing Complex Assembly (GO:0031334)	0.0032069	3.8892	22.3335	['CDH5', 'TPPP3', 'NEK7', 'DAB2IP', 'CAPG', 'FERMT2', 'VEGFA']	0.0493615	0	0
158	159	Regulation Of Cellular Component Organization (GO:0051128)	0.00332043	3.16781	18.0808	['TJP1', 'HIP1', 'DAB2IP', 'APOE', 'STON2', 'SGK1', 'ERMN', 'AGT', 'GFAP']	0.0493615	0	0
159	160	Cellular Response To Insulin Stimulus (GO:0032869)	0.00339405	3.84673	21.8715	['KAT2B', 'HDAC5', 'SLC27A1', 'RAB13', 'GAB1', 'FOXO4', 'ZFP36L1']	0.0493615	0	0
160	161	Positive Regulation Of Protein Phosphorylation (GO:0001934)	0.00340179	2.26262	12.8595	['CD74', 'NTRK2', 'FAXDC2', 'TNK2', 'AGAP2', 'VEGFB', 'ARRB1', 'FGF1', 'FGF2', 'AGT', 'MOB3B', 'VEGFA', 'C3', 'RASSF2', 'ENPP2', 'SOX9']	0.0493615	0	0
161	162	Regulation Of Cholesterol Efflux (GO:0010874)	0.0034171	7.19023	40.833	['NFKBIA', 'ABCA2', 'APOE', 'ABCA8']	0.0493615	0	0
162	163	Epithelium Development (GO:0060429)	0.00346709	3.1458	17.8192	['SLC9A3R1', 'CBR1', 'DVL1', 'SOX9', 'ZNF358', 'SOX10', 'FGFR2', 'CNN3', 'VEGFA']	0.0493615	0	0
163	164	Protein-Containing Complex Organization (GO:0043933)	0.00347497	3.43192	19.4321	['SLC9A3R1', 'CD74', 'WIPF1', 'CAPN3', 'CAPG', 'SOX9', 'SHANK1', 'VAMP3']	0.0493615	0	0
164	165	Rho Protein Signal Transduction (GO:0007266)	0.00347893	5.36302	30.3602	['GNA13', 'RTKN', 'ARHGEF1', 'RHOU', 'TAX1BP3']	0.0493615	0	0
165	166	Regulation Of Establishment Of Endothelial Barrier (GO:1903140)	0.0034858	11.5941	65.6116	['CDH5', 'CLDN5', 'VEGFA']	0.0493615	0	0
166	167	Intracellular Cholesterol Transport (GO:0032367)	0.0034858	11.5941	65.6116	['NPC1', 'PIP4K2A', 'ABCG1']	0.0493615	0	0
167	168	Oligodendrocyte Development (GO:0014003)	0.0034858	11.5941	65.6116	['MYRF', 'PLP1', 'SOX10']	0.0493615	0	0
168	169	Positive Regulation Of Cell Migration Involved In Sprouting Angiogenesis (GO:0090050)	0.0034858	11.5941	65.6116	['ANXA1', 'FGF2', 'VEGFA']	0.0493615	0	0
169	170	Positive Regulation Of Collagen Metabolic Process (GO:0010714)	0.0034858	11.5941	65.6116	['RGCC', 'VIM', 'VSIR']	0.0493615	0	0
170	171	Positive Regulation Of Myeloid Leukocyte Cytokine Production Involved In Immune Response (GO:0061081)	0.0034858	11.5941	65.6116	['CD74', 'GPRC5B', 'LAPTM5']	0.0493615	0	0
171	172	Regulation Of GTPase Activity (GO:0043087)	0.00350808	2.75248	15.5589	['PREX2', 'ITGB1', 'PREX1', 'NTRK2', 'DAB2IP', 'PLXNB3', 'PLXNB1', 'FERMT2', 'RAPGEF3', 'MAP4K4', 'TGM2']	0.0493615	0	0
172	173	Cellular Response To Growth Factor Stimulus (GO:0071363)	0.00361879	3.12409	17.5624	['WWOX', 'SEMA6A', 'ANXA1', 'DAB2IP', 'MT1G', 'SOX9', 'ZFP36L2', 'ZFP36L1', 'VEGFA']	0.0493615	0	0
173	174	Regulation Of Anatomical Structure Morphogenesis (GO:0022603)	0.00364672	3.4029	19.1036	['PHLDB1', 'FMNL2', 'NSMF', 'FGF2', 'SHANK3', 'FERMT2', 'FGFR2', 'RAPGEF3']	0.0493615	0	0
174	175	Regulation Of Mast Cell Chemotaxis (GO:0060753)	0.00370311	33.4254	187.135	['VEGFB', 'VEGFA']	0.0493615	0	0
175	176	Regulation Of Non-Motile Cilium Assembly (GO:1902855)	0.00370311	33.4254	187.135	['SEPTIN9', 'SEPTIN7']	0.0493615	0	0
176	177	Cell Junction Disassembly (GO:0150146)	0.00370311	33.4254	187.135	['C1QB', 'C1QC']	0.0493615	0	0
177	178	Tight Junction Organization (GO:0120193)	0.00370311	33.4254	187.135	['CLDN11', 'CLDN5']	0.0493615	0	0
178	179	Vascular Endothelial Growth Factor Receptor-2 Signaling Pathway (GO:0036324)	0.00370311	33.4254	187.135	['DAB2IP', 'VEGFA']	0.0493615	0	0
179	180	Humoral Immune Response Mediated By Circulating Immunoglobulin (GO:0002455)	0.00370311	33.4254	187.135	['C1QB', 'C1QC']	0.0493615	0	0
180	181	Negative Regulation Of Lipoprotein Lipase Activity (GO:0051005)	0.00370311	33.4254	187.135	['APOC1', 'ANGPTL4']	0.0493615	0	0
181	182	Positive Regulation Of Endothelial Cell Development (GO:1901552)	0.00370311	33.4254	187.135	['CDH5', 'CLDN5']	0.0493615	0	0
182	183	Positive Regulation Of Establishment Of Endothelial Barrier (GO:1903142)	0.00370311	33.4254	187.135	['CDH5', 'CLDN5']	0.0493615	0	0
183	184	Positive Regulation Of Vesicle Fusion (GO:0031340)	0.00370311	33.4254	187.135	['ANXA1', 'DOC2B']	0.0493615	0	0
184	185	Regulation Of Blood Vessel Remodeling (GO:0060312)	0.00370311	33.4254	187.135	['CST3', 'TMBIM1']	0.0493615	0	0

## Sheet: SUB_GO_result
Unnamed: 0	Rank	Term name	P-value	Z-score	Combined score	Overlapping genes	Adjusted p-value	Old p-value	Old adjusted p-value
0	1	Chemical Synaptic Transmission (GO:0007268)	5.01062e-09	4.47071	85.4429	['GABRB2', 'SNAP25', 'NRXN1', 'CPLX1', 'LIN7B', 'CDH8', 'PDZD11', 'SNCG', 'SNCB', 'GRIA3', 'GABRQ', 'CHRNB2', 'GABRA1', 'PTPRN2', 'SLC12A5', 'HOMER1', 'SYT1', 'GABRA4', 'GAD1', 'GABRA3', 'NSG1', 'GABRG2', 'CACNB4', 'GLRB', 'SCN2B']	9.98616e-06	0	0
1	2	Neurotransmitter Secretion (GO:0007269)	3.65102e-08	13.136	224.963	['RPH3A', 'SNAP25', 'RAB3A', 'PTPRN2', 'SYT1', 'PDZD11', 'NRXN1', 'CPLX1', 'LIN7B', 'VAMP2']	2.98007e-05	0	0
2	3	Sodium Ion Transmembrane Transport (GO:0035725)	4.48581e-08	8.20682	138.857	['SLC24A2', 'SLC6A17', 'SLC6A15', 'ATP1A3', 'ATP1B1', 'SLC8A1', 'SLC4A8', 'SLC9A6', 'SCN2A', 'SCN4B', 'SCN1B', 'HCN1', 'SCN2B']	2.98007e-05	0	0
3	4	Cellular Respiration (GO:0045333)	6.97799e-08	7.86366	129.577	['COX8A', 'NDUFB9', 'NDUFA6', 'NDUFA12', 'NDUFB11', 'MDH2', 'COX4I1', 'COX7A2', 'COX6A1', 'NDUFAB1', 'UQCRC1', 'CYCS', 'CYC1']	3.47678e-05	0	0
4	5	Sodium Ion Transport (GO:0006814)	1.22163e-07	7.44825	118.561	['SLC24A2', 'SLC6A17', 'SLC6A15', 'ATP1B1', 'SLC8A1', 'SLC4A8', 'SCN8A', 'SCN2A', 'SCN4B', 'SCN1B', 'SCN1A', 'HCN1', 'SCN2B']	4.8694e-05	0	0
5	6	Signal Release From Synapse (GO:0099643)	1.50165e-07	13.426	210.943	['SNAP25', 'RAB3A', 'PTPRN2', 'SYT1', 'PDZD11', 'NRXN1', 'CPLX1', 'LIN7B', 'VAMP2']	4.98797e-05	0	0
6	7	Regulation Of Exocytosis (GO:0017157)	3.63442e-07	9.84646	146	['NSF', 'RAB3C', 'RAB3A', 'SYT1', 'RAB26', 'LGI3', 'CADPS', 'STXBP5', 'CPLX1', 'VAMP2']	0.000103477	0	0
7	8	Mitochondrial ATP Synthesis Coupled Electron Transport (GO:0042775)	5.3909e-07	8.0892	116.755	['COX8A', 'NDUFB9', 'NDUFA6', 'NDUFA12', 'COX4I1', 'NDUFAB1', 'UQCRC1', 'CYCS', 'COX7A2', 'CYC1', 'COX6A1']	0.000134301	0	0
8	9	Exocytosis (GO:0006887)	6.22307e-07	7.04609	100.687	['RPH3A', 'NSF', 'SNAP25', 'STX1B', 'SYNGR1', 'RAB3A', 'RAB26', 'CADPS', 'SYNGR3', 'CPLX1', 'VAMP2', 'RAB11FIP5']	0.000137806	0	0
9	10	Chloride Transmembrane Transport (GO:1902476)	1.25998e-06	9.97834	135.55	['GABRB2', 'GABRA1', 'SLC4A8', 'SLC12A5', 'GLRB', 'GABRA4', 'GABRA3', 'GABRG2', 'ANO3']	0.000251115	0	0
10	11	Inorganic Anion Transmembrane Transport (GO:0098661)	1.61352e-06	8.17065	108.973	['GABRB2', 'GABRA1', 'SLC4A8', 'SLC25A3', 'SLC12A5', 'GLRB', 'GABRA4', 'GABRA3', 'GABRG2', 'ANO3']	0.00029234	0	0
11	12	Regulation Of Secretion By Cell (GO:1903530)	1.87348e-06	8.01893	105.751	['NSF', 'RAB3C', 'RAB3A', 'SYT1', 'RAB26', 'LGI3', 'SCG5', 'STXBP5', 'CPLX1', 'VAMP2']	0.000311154	0	0
12	13	Cardiac Muscle Cell Contraction (GO:0086003)	2.10325e-06	21.5066	281.135	['CAMK2D', 'FGF12', 'SCN4B', 'SCN1B', 'SCN1A', 'SCN2B']	0.000322444	0	0
13	14	Regulation Of Sodium Ion Transmembrane Transport (GO:1902305)	2.53428e-06	14.3628	185.073	['CAMK2D', 'FXYD7', 'FXYD6', 'FGF12', 'SCN4B', 'SCN1B', 'SCN2B']	0.000360773	0	0
14	15	Cardiac Muscle Cell Action Potential (GO:0086001)	3.27483e-06	13.7092	173.137	['ATP1B1', 'FGF12', 'SCN4B', 'SLC8A1', 'SCN1B', 'SCN1A', 'SCN2B']	0.000412666	0	0
15	16	Aerobic Electron Transport Chain (GO:0019646)	3.31292e-06	7.46437	94.183	['COX8A', 'NDUFB9', 'NDUFA6', 'COX4I1', 'NDUFAB1', 'UQCRC1', 'CYCS', 'COX7A2', 'CYC1', 'COX6A1']	0.000412666	0	0
16	17	Monoatomic Anion Transmembrane Transport (GO:0098656)	3.53591e-06	8.64523	108.52	['GABRB2', 'GABRA1', 'SLC4A8', 'SLC12A5', 'GLRB', 'GABRA4', 'GABRA3', 'GABRG2', 'ANO3']	0.000414534	0	0
17	18	Regulation Of Vesicle-Mediated Transport (GO:0060627)	6.14718e-06	6.11279	73.3505	['NSF', 'RAB3C', 'NELL1', 'RAB3A', 'SYT1', 'RAB26', 'LGI3', 'OCRL', 'STXBP5', 'CPLX1', 'VAMP2']	0.000662146	0	0
18	19	Synaptic Vesicle Recycling (GO:0036465)	6.31248e-06	9.58899	114.809	['AP3M2', 'RAB3A', 'SYT1', 'SYNJ1', 'SNCG', 'SNCB', 'DNM1', 'VAMP2']	0.000662146	0	0
19	20	Monoatomic Cation Transmembrane Transport (GO:0098655)	8.80605e-06	3.35754	39.082	['ATP6V1A', 'SLC24A2', 'KCNF1', 'SLC6A17', 'KCNB1', 'SLC6A15', 'KCNA2', 'ATP1A3', 'ATP1B1', 'SLC8A1', 'SLC4A8', 'ATP5F1B', 'SLC9A6', 'ATP6V1B2', 'SCN2A', 'SCN4B', 'SCN1B', 'ATP5MF', 'SCN2B', 'HCN1']	0.000877523	0	0
20	21	Protein Localization To Membrane (GO:0072657)	9.97657e-06	3.96478	45.6556	['RAB3C', 'SPTBN4', 'RAB3A', 'KCNB1', 'NRXN1', 'LRRC4', 'MYO5A', 'THY1', 'CYP46A1', 'ATP1B1', 'LIN7B', 'EFR3A', 'PDZD11', 'EPB41L3', 'ITGB1BP1', 'BID']	0.000881942	0	0
21	22	Inorganic Cation Transmembrane Transport (GO:0098662)	1.02987e-05	3.31887	38.1122	['ATP6V1A', 'SLC24A2', 'KCNF1', 'SLC6A17', 'KCNB1', 'SLC6A15', 'KCNA2', 'ATP1A3', 'ATP1B1', 'SLC8A1', 'SLC4A8', 'ATP5F1B', 'SLC9A6', 'ATP6V1B2', 'SCN2A', 'SCN4B', 'SCN1B', 'ATP5MF', 'SCN2B', 'HCN1']	0.000881942	0	0
22	23	Chloride Transport (GO:0006821)	1.03948e-05	6.45871	74.1085	['GABRB2', 'GABRA1', 'SLC4A8', 'SLC12A5', 'GLRB', 'GABRA4', 'GABRA3', 'SLC4A10', 'GABRG2', 'ANO3']	0.000881942	0	0
23	24	Synaptic Transmission, GABAergic (GO:0051932)	1.06205e-05	23.8474	273.117	['GABRA1', 'GABRB2', 'GABRA4', 'GABRA3', 'GABRG2']	0.000881942	0	0
24	25	Oxidative Phosphorylation (GO:0006119)	1.31058e-05	7.20103	80.9573	['NDUFB9', 'ATP5F1B', 'NDUFA6', 'NDUFA12', 'NDUFB11', 'NDUFAB1', 'UQCRC1', 'CHCHD10', 'ATP5MF']	0.00104479	0	0
25	26	Regulation Of Sodium Ion Transmembrane Transporter Activity (GO:2000649)	1.84268e-05	10.0493	109.554	['CAMK2D', 'FXYD7', 'FXYD6', 'FGF12', 'SCN4B', 'SCN1B', 'SCN2B']	0.00141249	0	0
26	27	Regulated Exocytosis (GO:0045055)	1.97006e-05	8.02511	86.9509	['SNAP25', 'SYNGR1', 'RAB3A', 'RAB26', 'SYNGR3', 'CPLX1', 'VAMP2', 'RAB11FIP5']	0.0014542	0	0
27	28	Mitochondrial Electron Transport, Cytochrome C To Oxygen (GO:0006123)	2.23059e-05	19.5095	208.96	['COX8A', 'COX4I1', 'CYCS', 'COX7A2', 'COX6A1']	0.00156824	0	0
28	29	Neurotransmitter Transport (GO:0006836)	2.28193e-05	7.84232	83.8179	['SNAP25', 'PTPRN2', 'SYT1', 'SYNJ1', 'PDZD11', 'SLC6A15', 'NRXN1', 'LIN7B']	0.00156824	0	0
29	30	Regulation Of Monoatomic Ion Transmembrane Transporter Activity (GO:0032412)	2.77837e-05	6.47894	67.9709	['HOMER1', 'FXYD7', 'FXYD6', 'CAPN1', 'SCN4B', 'FGF12', 'SCN1B', 'HCN1', 'SCN2B']	0.00184576	0	0
30	31	Axonogenesis (GO:0007409)	3.1381e-05	3.77353	39.1289	['SPTBN4', 'RAB3A', 'ATL1', 'NRXN1', 'NRXN3', 'L1CAM', 'NELL1', 'EFNB3', 'SLC9A6', 'MAP1B', 'ANOS1', 'SLIT2', 'NEFH', 'SCN1B', 'B4GALT5']	0.00195814	0	0
31	32	Synaptic Vesicle Endocytosis (GO:0048488)	3.14403e-05	9.13432	94.6994	['SYT1', 'SYNJ1', 'SNCG', 'SNCB', 'DNM1', 'SNAP91', 'VAMP2']	0.00195814	0	0
32	33	Synaptic Vesicle Exocytosis (GO:0016079)	3.7169e-05	8.86521	90.4255	['SNAP25', 'SYT4', 'STX1B', 'RAB3A', 'SYT1', 'CPLX1', 'VAMP2']	0.00224479	0	0
33	34	Energy Derivation By Oxidation Of Organic Compounds (GO:0015980)	5.12055e-05	8.37184	82.711	['COX8A', 'COX4I1', 'UQCRC1', 'CYCS', 'COX7A2', 'CYC1', 'COX6A1']	0.00300155	0	0
34	35	Aerobic Respiration (GO:0009060)	5.84253e-05	6.76349	65.9289	['NDUFB9', 'NDUFA6', 'NDUFA12', 'NDUFB11', 'MDH2', 'NDUFAB1', 'UQCRC1', 'CHCHD10']	0.0033269	0	0
35	36	Anterograde Trans-Synaptic Signaling (GO:0098916)	6.04636e-05	3.54592	34.4432	['GABRQ', 'CHRNB2', 'GABRB2', 'SNAP25', 'SLC12A5', 'HOMER1', 'SYT1', 'GAD1', 'NRXN1', 'CPLX1', 'CACNB4', 'GLRB', 'SNCG', 'SNCB', 'SCN2B']	0.00334733	0	0
36	37	Presynaptic Endocytosis (GO:0140238)	6.47271e-05	10.3163	99.5041	['SYT1', 'SYNJ1', 'SNCG', 'SNCB', 'DNM1', 'VAMP2']	0.00346548	0	0
37	38	Proton Motive Force-Driven ATP Synthesis (GO:0015986)	6.60753e-05	6.63308	63.8415	['NDUFB9', 'ATP5F1B', 'NDUFA6', 'NDUFA12', 'NDUFB11', 'NDUFAB1', 'ATP5MC3', 'ATP5MF']	0.00346548	0	0
38	39	Nervous System Development (GO:0007399)	7.23053e-05	2.57477	24.5495	['PRPS1', 'NRSN2', 'RBFOX2', 'NRSN1', 'MYT1L', 'NRXN1', 'LIMK1', 'FN1', 'PPP2R5D', 'LDB2', 'L1CAM', 'CYP46A1', 'DCLK1', 'NRGN', 'NELL1', 'ALDH5A1', 'EFNB3', 'GLRB', 'SCN8A', 'ADAM23', 'SERPINI1', 'TAGLN3', 'SCN2A', 'FGF12']	0.00365589	0	0
39	40	Gamma-Aminobutyric Acid Signaling Pathway (GO:0007214)	7.33747e-05	14.304	136.173	['GABRA1', 'GABRB2', 'GABRA4', 'GABRA3', 'GABRG2']	0.00365589	0	0
40	41	Gluconeogenesis (GO:0006094)	7.81289e-05	9.91901	93.8056	['MDH1', 'MDH2', 'PGAM1', 'PGK1', 'ENO2', 'SLC25A12']	0.00379782	0	0
41	42	Cardiac Muscle Contraction (GO:0060048)	9.36513e-05	9.55115	88.5958	['CAMK2D', 'ATP1B1', 'SCN4B', 'SLC8A1', 'SCN1B', 'SCN2B']	0.00444398	0	0
42	43	Relaxation Of Cardiac Muscle (GO:0055119)	0.000118072	21.4167	193.697	['CHGA', 'CAMK2D', 'ATP1B1', 'SLC8A1']	0.00534812	0	0
43	44	Positive Regulation Of Regulated Secretory Pathway (GO:1903307)	0.000118072	21.4167	193.697	['SLC4A8', 'SYT4', 'RAB3A', 'KCNB1']	0.00534812	0	0
44	45	Inorganic Cation Import Across Plasma Membrane (GO:0098659)	0.000131447	4.64683	41.5283	['SLC24A2', 'SLC12A5', 'SLC9A6', 'KCNJ9', 'SCN8A', 'ATP1A3', 'ATP1B1', 'SCN2A', 'SLC8A1', 'SCN1A']	0.00571965	0	0
45	46	Hexose Biosynthetic Process (GO:0019319)	0.000132014	8.89154	79.4246	['MDH1', 'MDH2', 'PGAM1', 'PGK1', 'ENO2', 'SLC25A12']	0.00571965	0	0
46	47	Neuron Projection Morphogenesis (GO:0048812)	0.000144803	3.87913	34.2921	['SPTBN4', 'CNTNAP2', 'CNTNAP1', 'PAK1', 'RAB3A', 'SLC9A6', 'MAP1B', 'ATL1', 'EPB41L3', 'NEFH', 'DCLK1', 'ZNF365']	0.00614024	0	0
47	48	Neuron Projection Development (GO:0031175)	0.000150192	3.41447	30.0596	['CNTNAP2', 'CNTNAP1', 'RASGRF1', 'STMN2', 'NMNAT2', 'L1CAM', 'DCLK1', 'PAK1', 'SLC9A6', 'MAP1B', 'STMN1', 'EPB41L3', 'NEFH', 'ZNF365']	0.0062361	0	0
48	49	Regulation Of Short-Term Neuronal Synaptic Plasticity (GO:0048172)	0.000167456	19.0361	165.515	['SYNGR1', 'RAB3A', 'SLC4A10', 'SYP']	0.0066748	0	0
49	50	Membrane Depolarization During Action Potential (GO:0086010)	0.000167456	19.0361	165.515	['SCN4B', 'SLC8A1', 'SCN1B', 'SCN2B']	0.0066748	0	0
50	51	Proton Motive Force-Driven Mitochondrial ATP Synthesis (GO:0042776)	0.000200988	6.54852	55.7427	['NDUFB9', 'ATP5F1B', 'NDUFA6', 'NDUFA12', 'NDUFB11', 'NDUFAB1', 'ATP5MF']	0.0078543	0	0
51	52	ATP Biosynthetic Process (GO:0006754)	0.000228691	10.7253	89.9114	['ATP5F1A', 'ATP5F1B', 'ATP5MC3', 'PRKAG2', 'ATP5MF']	0.00863293	0	0
52	53	Hepatocyte Growth Factor Receptor Signaling Pathway (GO:0048012)	0.000229576	42.7505	358.219	['NELL1', 'PAK1', 'STMN1']	0.00863293	0	0
53	54	Positive Regulation Of Secretion By Cell (GO:1903532)	0.000267603	5.30293	43.6219	['ACHE', 'STX1B', 'RAB3A', 'KCNB1', 'CADPS', 'STXBP5', 'ATP13A2', 'BAIAP3']	0.00987655	0	0
54	55	Regulation Of Catecholamine Secretion (GO:0050433)	0.00033458	9.74925	78.0197	['CHRNB2', 'SYT4', 'SYT1', 'KCNB1', 'KCNA2']	0.012124	0	0
55	56	Intermediate Filament Bundle Assembly (GO:0045110)	0.000394897	32.0613	251.261	['NEFL', 'NEFM', 'NEFH']	0.0136306	0	0
56	57	Regulation Of Calcium Ion-Dependent Exocytosis (GO:0017158)	0.000399682	9.32489	72.9658	['RPH3A', 'SYT4', 'SYT1', 'KCNB1', 'BAIAP3']	0.0136306	0	0
57	58	Endoplasmic Reticulum Tubular Network Organization (GO:0071786)	0.000403516	14.2749	111.562	['REEP1', 'RTN1', 'ATL1', 'REEP2']	0.0136306	0	0
58	59	Membrane Depolarization During Cardiac Muscle Cell Action Potential (GO:0086012)	0.000403516	14.2749	111.562	['SCN4B', 'SLC8A1', 'SCN1B', 'SCN2B']	0.0136306	0	0
59	60	Protein Localization To Cell Periphery (GO:1990778)	0.000452024	3.62976	27.9556	['RAB3C', 'SPTBN4', 'EFR3A', 'RAB3A', 'PDZD11', 'KCNB1', 'EPB41L3', 'MYO5A', 'ITGB1BP1', 'ATP1B1', 'LIN7B']	0.0150147	0	0
60	61	Cardiac Muscle Cell Action Potential Involved In Contraction (GO:0086002)	0.000558041	8.57802	64.2586	['FGF12', 'SCN4B', 'SCN1B', 'SCN1A', 'SCN2B']	0.0182324	0	0
61	62	Vesicle-Mediated Transport (GO:0016192)	0.000593607	2.34887	17.4504	['NSF', 'SNAP25', 'SPTBN4', 'SYT4', 'RAB3A', 'CADPS', 'MYO5A', 'NSG1', 'SYP', 'CPLX1', 'DCLK1', 'DNM1', 'NCALD', 'RPH3A', 'AP3M2', 'STX1B', 'CALY', 'REPS2', 'VAMP1', 'GPRASP1', 'VAMP2']	0.0190816	0	0
62	63	Cardiac Conduction (GO:0061337)	0.00061552	6.44273	47.6314	['SPTBN4', 'CAMK2D', 'SCN4B', 'SCN1B', 'HCN1', 'SCN2B']	0.0193401	0	0
63	64	Positive Regulation Of Calcium Ion-Dependent Exocytosis (GO:0045956)	0.000621056	25.6477	189.385	['SYT4', 'SYT1', 'KCNB1']	0.0193401	0	0
64	65	Vesicle-Mediated Transport In Synapse (GO:0099003)	0.000654141	12.2343	89.7044	['SNAP25', 'RAB3A', 'CPLX1', 'VAMP2']	0.020057	0	0
65	66	Regulation Of Ubiquitin-Protein Transferase Activity (GO:0051438)	0.00075935	7.9418	57.0463	['PINK1', 'FBXW7', 'LIMK1', 'UBE2N', 'PIN1']	0.0229301	0	0
66	67	Myelination (GO:0042552)	0.000775815	6.13531	43.9386	['CNTNAP1', 'AMIGO1', 'SCN8A', 'EPB41L3', 'SCN2A', 'B4GALT5']	0.0230776	0	0
67	68	Regulation Of Autophagy Of Mitochondrion (GO:1903146)	0.000813624	11.4181	81.2287	['PINK1', 'FBXW7', 'VDAC1', 'CAMKK2']	0.0238464	0	0
68	69	Proton Transmembrane Transport (GO:1902600)	0.000867154	5.99232	42.2476	['ATP6V1A', 'ATP5F1B', 'ATP6V1B2', 'ATP1A3', 'ATP1B1', 'ATP5MF']	0.0250469	0	0
69	70	Dicarboxylic Acid Metabolic Process (GO:0043648)	0.000966559	5.85583	40.6498	['ALDH5A1', 'GOT1', 'MDH1', 'MDH2', 'OGDHL', 'ASS1']	0.0268971	0	0
70	71	Plasma Membrane Bounded Cell Projection Morphogenesis (GO:0120039)	0.000966559	5.85583	40.6498	['CNTNAP2', 'CNTNAP1', 'PAK1', 'SLC9A6', 'EPB41L3', 'DCLK1']	0.0268971	0	0
71	72	Regulation Of Membrane Depolarization (GO:0003254)	0.000998687	10.7039	73.9543	['CAMK2D', 'SCN1B', 'HCN1', 'SCN2B']	0.0268971	0	0
72	73	Sensory Perception Of Pain (GO:0019233)	0.000998687	10.7039	73.9543	['CHRNB2', 'KCNA2', 'RETREG1', 'NIPSNAP1']	0.0268971	0	0
73	74	Glutamate Metabolic Process (GO:0006536)	0.000998687	10.7039	73.9543	['ALDH5A1', 'GOT1', 'GAD1', 'GLS']	0.0268971	0	0
74	75	Regulation Of Regulated Secretory Pathway (GO:1903305)	0.00115682	7.14652	48.3254	['RPH3A', 'SYT4', 'PREPL', 'RAB3A', 'SYT1']	0.0307405	0	0
75	76	Regulation Of Protein Ubiquitination (GO:0031396)	0.00120432	3.7294	25.0685	['PINK1', 'NDFIP1', 'CAMLG', 'FBXW7', 'WFS1', 'UBE2N', 'CHP1', 'ISG15', 'PRICKLE1']	0.0315816	0	0
76	77	Potassium Ion Transmembrane Transport (GO:0071805)	0.00128099	3.39685	22.6234	['SLC24A2', 'KCNF1', 'SLC12A5', 'SLC9A6', 'KCNB1', 'KCNJ9', 'KCNA2', 'ATP1A3', 'ATP1B1', 'HCN1']	0.0328561	0	0
77	78	Purine Ribonucleoside Triphosphate Biosynthetic Process (GO:0009206)	0.00128589	18.3179	121.93	['ATP5F1A', 'ATP5F1B', 'PRKAG2']	0.0328561	0	0
78	79	Regulation Of Dopamine Secretion (GO:0014059)	0.00145399	9.51365	62.1569	['CHRNB2', 'SYT4', 'SYT1', 'KCNA2']	0.036358	0	0
79	80	Calcium Ion Import Across Plasma Membrane (GO:0098703)	0.00149591	6.69918	43.5783	['SLC24A2', 'SCN8A', 'SCN2A', 'SLC8A1', 'SCN1A']	0.036358	0	0
80	81	Synaptic Vesicle Cycle (GO:0099504)	0.00149591	6.69918	43.5783	['AP3M2', 'SNAP25', 'RAB3A', 'CPLX1', 'VAMP2']	0.036358	0	0
81	82	Positive Regulation Of Signaling (GO:0023056)	0.00149591	6.69918	43.5783	['NSF', 'HOMER1', 'SYT1', 'CLSTN3', 'OCRL']	0.036358	0	0
82	83	Axon Extension (GO:0048675)	0.00172842	9.01247	57.3242	['NELL1', 'SLC9A6', 'MAP1B', 'SLIT2']	0.041237	0	0
83	84	Central Nervous System Neuron Axonogenesis (GO:0021955)	0.00173804	16.0274	101.854	['CHRNB2', 'SPTBN4', 'B4GALT5']	0.041237	0	0
84	85	Regulation Of Cation Channel Activity (GO:2001257)	0.0017592	5.15154	32.6757	['CAMK2D', 'CACNB4', 'HOMER1', 'FGF12', 'VAMP2', 'HCN1']	0.041248	0	0
85	86	Negative Regulation Of Protein Secretion (GO:0050709)	0.00190297	6.30446	39.4933	['CHGA', 'KCNB1', 'CCN3', 'CD200', 'RAB11FIP5']	0.0441002	0	0
86	87	Positive Regulation Of Synaptic Transmission (GO:0050806)	0.00195618	4.29801	26.8057	['SLC24A2', 'STX1B', 'SYT1', 'CLSTN3', 'NRXN1', 'VAMP2', 'BAIAP3']	0.0448123	0	0
87	88	Axon Development (GO:0061564)	0.0020313	3.78275	23.4496	['SPTBN4', 'RAB3A', 'MAP1B', 'AMIGO1', 'ATL1', 'NMNAT2', 'L1CAM', 'NEFH']	0.0460044	0	0
88	89	Regulation Of Neuron Death (GO:1901214)	0.00211024	4.9529	30.5146	['CHGA', 'SNCG', 'FAIM2', 'ATP13A2', 'SNCB', 'CD200']	0.04673	0	0
89	90	Positive Regulation Of Mitochondrion Organization (GO:0010822)	0.00211024	4.9529	30.5146	['MLLT11', 'MOAP1', 'PINK1', 'CHCHD10', 'BID', 'CAMKK2']	0.04673	0	0
90	91	Modulation Of Chemical Synaptic Transmission (GO:0050804)	0.00217236	3.40051	20.8517	['CHRNB2', 'SLC4A8', 'HOMER1', 'SYT1', 'CLSTN3', 'LRRC4', 'CPLX1', 'GRIA3', 'BAIAP3']	0.0475771	0	0
91	92	Aspartate Family Amino Acid Metabolic Process (GO:0009066)	0.00227803	14.2458	86.6778	['GOT1', 'SLC25A12', 'ASS1']	0.049349	0	0
92	93	Glucose Metabolic Process (GO:0006006)	0.00230439	4.8592	29.5096	['MDH1', 'MDH2', 'PGAM1', 'PGK1', 'ENO2', 'SLC25A12']	0.0493834	0	0
93	94	Positive Regulation Of Release Of Cytochrome C From Mitochondria (GO:0090200)	0.00238122	8.1533	49.2471	['MLLT11', 'MOAP1', 'PINK1', 'BID']	0.0495256	0	0
94	95	Regulation Of Heart Rate By Cardiac Conduction (GO:0086091)	0.00238558	5.9536	35.9497	['CAMK2D', 'SCN4B', 'SCN1B', 'HCN1', 'SCN2B']	0.0495256	0	0
95	96	Heart Contraction (GO:0060047)	0.00238558	5.9536	35.9497	['ATP1B1', 'SCN4B', 'SLC8A1', 'SCN1B', 'SCN2B']	0.0495256	0	0

## Sheet: VAS_GO_result
Unnamed: 0	Rank	Term name	P-value	Z-score	Combined score	Overlapping genes	Adjusted p-value	Old p-value	Old adjusted p-value
0	1	Regulation Of Cell Migration (GO:0030334)	7.44506e-13	4.60662	128.645	['ITGB1', 'GRN', 'IFITM1', 'CLIC4', 'CD151', 'ROCK1', 'PTEN', 'PDGFA', 'VSIR', 'SYNE2', 'MYLK', 'IGF1R', 'CDH5', 'PODXL', 'TMSB4X', 'RACK1', 'FLNA', 'PLEKHG3', 'PDGFRB', 'CD74', 'XBP1', 'ANXA1', 'INSR', 'STAT3', 'TPM1', 'ACTN4', 'RHOA', 'RHOB', 'BST2', 'TJP1', 'CLDN5', 'PECAM1', 'MYADM', 'PLXNB2', 'ITGA6', 'FERMT2', 'ENG']	2.03623e-09	0	0
1	2	Regulation Of Apoptotic Process (GO:0042981)	4.09339e-12	3.57464	93.733	['ITGB1', 'PRKAA1', 'TNFRSF6B', 'HIP1', 'TFRC', 'HSPB1', 'HMGB1', 'FSTL1', 'RELA', 'HSP90B1', 'IGF1R', 'LGALS1', 'RACK1', 'MAP3K20', 'FLNA', 'BNIP2', 'MCL1', 'TGM2', 'CD74', 'XBP1', 'ANXA1', 'GADD45B', 'TSC22D1', 'PRMT2', 'IGFBP3', 'ACTN1', 'ANXA5', 'CFLAR', 'ACTN4', 'HIPK3', 'RHOB', 'DNM2', 'DNAJC3', 'TJP1', 'DDAH2', 'CAT', 'ITGA6', 'ANGPTL4', 'ANP32B', 'NUPR1', 'GAS6', 'IL6ST', 'NOP53', 'HSPA1B…	5.59771e-09	0	0
2	3	Negative Regulation Of Programmed Cell Death (GO:0043069)	1.8744e-10	4.32179	96.7976	['PRKAA1', 'TNFRSF6B', 'TFRC', 'HSPB1', 'FSTL1', 'RELA', 'IGF1R', 'HSP90B1', 'FLNA', 'TMEM109', 'BNIP2', 'MCL1', 'CD74', 'XBP1', 'ANXA1', 'TSC22D1', 'ANXA5', 'LAPTM5', 'CFLAR', 'HIPK3', 'TJP1', 'DNAJC3', 'DDAH2', 'CAT', 'ANGPTL4', 'NUPR1', 'GAS6', 'IL6ST', 'CD44', 'HSPA1B', 'HSPA1A']	1.70883e-07	0	0
3	4	Positive Regulation Of Cell Migration (GO:0030335)	9.28435e-10	4.89069	101.714	['ITGB1', 'GRN', 'CD151', 'BMPR2', 'PDGFA', 'VSIR', 'SYNE2', 'MYLK', 'IGF1R', 'CDH5', 'PODXL', 'RACK1', 'S100A11', 'PDGFRB', 'XBP1', 'INSR', 'STAT3', 'FN1', 'ACTN4', 'TJP1', 'MYADM', 'PECAM1', 'ITGA6', 'PFN1', 'FERMT2']	6.34817e-07	0	0
4	5	Response To Cytokine (GO:0034097)	1.30733e-09	7.51042	153.628	['IFITM3', 'CD74', 'IFITM1', 'IFITM2', 'ANXA1', 'CALCOCO2', 'ISG15', 'RHOA', 'RELA', 'BST2', 'PLSCR1', 'MAPKAPK2', 'TIMP2', 'TIMP3', 'TIMP1', 'IL6ST', 'MCL1']	7.15107e-07	0	0
5	6	Positive Regulation Of Cell Motility (GO:2000147)	2.17887e-09	5.31531	106.011	['PDGFRB', 'ITGB1', 'XBP1', 'GRN', 'CD151', 'CAVIN1', 'INSR', 'STAT3', 'PDGFA', 'ACTN4', 'VSIR', 'SYNE2', 'MYLK', 'IGF1R', 'TJP1', 'CDH5', 'PODXL', 'RACK1', 'MYADM', 'PECAM1', 'ITGA6', 'FERMT2']	9.29349e-07	0	0
6	7	Positive Regulation Of Intracellular Signal Transduction (GO:1902533)	2.64207e-09	3.49542	69.0405	['ITGB1', 'BMPR2', 'HIP1', 'TFRC', 'ROCK1', 'PDGFA', 'ILK', 'IQGAP1', 'HMGB1', 'LITAF', 'RELA', 'IGF1R', 'LGALS1', 'MIER1', 'RACK1', 'FLNA', 'TGM2', 'PDGFRB', 'CD74', 'VWF', 'INSR', 'ARRDC3', 'FN1', 'LAPTM5', 'CFLAR', 'RHOA', 'DCN', 'TNFRSF1A', 'BST2', 'FKBP1A', 'PDCD4', 'NUPR1', 'GAS6', 'FERMT2', 'ENG']	9.29349e-07	0	0
7	8	Regulation Of Protein Phosphorylation (GO:0001932)	2.71839e-09	4.80144	94.6999	['CD74', 'TFRC', 'FAXDC2', 'INSR', 'IGFBP3', 'RARRES2', 'ITGB2', 'FN1', 'PTEN', 'PDGFA', 'HSPB1', 'ILK', 'FBLN1', 'MOB3B', 'CDH5', 'MOB1A', 'DNAJC10', 'RACK1', 'MYADM', 'PECAM1', 'PLXNB2', 'GAS6', 'NOP53', 'ENG']	9.29349e-07	0	0
8	9	Negative Regulation Of Apoptotic Process (GO:0043066)	3.97898e-09	3.58596	69.3605	['ITGB1', 'PRKAA1', 'GRN', 'TNFRSF6B', 'TFRC', 'HSPB1', 'FSTL1', 'RELA', 'HSP90B1', 'IGF1R', 'FLNA', 'BNIP2', 'MCL1', 'SNX6', 'CD74', 'XBP1', 'ANXA1', 'TSC22D1', 'ANXA5', 'CFLAR', 'HIPK3', 'DNAJC3', 'TJP1', 'DDAH2', 'TMBIM1', 'CAT', 'ANGPTL4', 'NUPR1', 'GAS6', 'IL6ST', 'HSPA1B', 'CD44', 'HSPA1A']	1.20917e-06	0	0
9	10	Positive Regulation Of Macromolecule Metabolic Process (GO:0010604)	5.07365e-09	4.03841	77.1305	['PRKAA1', 'BMPR2', 'TFRC', 'ROCK1', 'ECE1', 'VSIR', 'RELA', 'CDH5', 'SLC38A2', 'CD74', 'GSN', 'IFNGR1', 'STAT3', 'FN1', 'LAPTM5', 'MSN', 'NFKBIA', 'ACTA2', 'CLDN5', 'PLSCR1', 'TYROBP', 'CD46', 'GAS6', 'HSPA1B', 'ATF4', 'VAMP3', 'HSPA1A', 'NFE2L2']	1.38764e-06	0	0
10	11	Integrin-Mediated Signaling Pathway (GO:0007229)	2.76876e-08	8.54703	148.738	['ITGB1', 'LAMA5', 'ITGB2', 'FN1', 'ILK', 'FBLN1', 'ISG15', 'PTN', 'ADAMTS1', 'ZYX', 'MYH9', 'ITGA6', 'FERMT2']	6.86316e-06	0	0
11	12	Response To Interferon-Alpha (GO:0035455)	3.01383e-08	32.7644	567.396	['IFITM3', 'BST2', 'IFITM1', 'IFITM2', 'TPR', 'GAS6', 'IFNAR1']	6.86316e-06	0	0
12	13	Homotypic Cell-Cell Adhesion (GO:0034109)	3.47682e-08	13.0783	224.614	['ACTN1', 'HSPB1', 'ILK', 'FLNA', 'MYH9', 'TLN1', 'CLIC1', 'MYL9', 'MYL12A', 'CD99']	6.86316e-06	0	0
13	14	Platelet Aggregation (GO:0070527)	3.51313e-08	16.2667	279.205	['ACTN1', 'HSPB1', 'ILK', 'FLNA', 'MYH9', 'TLN1', 'CLIC1', 'MYL9', 'MYL12A']	6.86316e-06	0	0
14	15	Regulation Of Stress Fiber Assembly (GO:0051492)	5.66265e-08	8.99896	150.164	['TJP1', 'ARHGEF10', 'ROCK1', 'TPM1', 'CCN2', 'PFN1', 'WASF2', 'SORBS3', 'CGNL1', 'RHOA', 'FERMT2', 'S100A10']	1.03249e-05	0	0
15	16	Positive Regulation Of Cytokine Production (GO:0001819)	1.03841e-07	3.89816	62.684	['CD74', 'XBP1', 'ANXA1', 'FCER1G', 'STAT3', 'LAPTM5', 'CYBA', 'ISG15', 'HLA-A', 'HMGB1', 'RELA', 'HLA-E', 'SULF2', 'FOXP1', 'SLC7A5', 'TYROBP', 'IFI16', 'CD14', 'CD46', 'IL6ST', 'HSPA1B', 'ATF4', 'HLA-DPA1', 'HSPA1A']	1.77503e-05	0	0
16	17	Regulation Of Endopeptidase Activity (GO:0052548)	2.11308e-07	8.94082	137.42	['APH1A', 'SERPINA3', 'TIMP2', 'PSME1', 'TIMP3', 'PSME2', 'SERPING1', 'TIMP1', 'VSIR', 'SERPINB6', 'PICALM']	3.21071e-05	0	0
17	18	Phagocytosis (GO:0006909)	2.11308e-07	8.94082	137.42	['ITGB1', 'ANXA1', 'TYROBP', 'GSN', 'ITGB2', 'PECAM1', 'MYH9', 'HMGB1', 'CD14', 'GAS6', 'TGM2']	3.21071e-05	0	0
18	19	Positive Regulation Of Actin Filament Bundle Assembly (GO:0032233)	1.12046e-06	10.0616	137.862	['ARHGEF10', 'SYNPO2', 'TPM1', 'CCN2', 'PFN1', 'SORBS3', 'RHOA', 'FERMT2', 'S100A10']	0.000161288	0	0
19	20	Regulation Of Cell Population Proliferation (GO:0042127)	1.23143e-06	2.54205	34.5905	['IFITM1', 'BMPR2', 'TFRC', 'PTEN', 'PDGFA', 'PTN', 'RELA', 'GNAI2', 'ZFP36L1', 'IGF1R', 'ADAMTS1', 'BCL7C', 'NAMPT', 'TSPO', 'IGFBP7', 'TIMP1', 'JUNB', 'S100A11', 'TNS2', 'PDGFRB', 'XBP1', 'TSC22D1', 'IGFBP3', 'INSR', 'STAT3', 'FN1', 'PLAAT4', 'RHOA', 'TJP1', 'CLDN5', 'CDK4', 'NUPR1', 'CNOT8', 'IL6ST', 'HSPA1B', 'PLPP1', 'HSPA1A', 'ENG']	0.000168398	0	0
20	21	Vascular Transport (GO:0010232)	1.43262e-06	7.19716	96.8451	['SLC7A5', 'SLC16A1', 'TFRC', 'SLCO2B1', 'INSR', 'SLC2A1', 'SLC2A3', 'SLC7A1', 'SLC38A2', 'MFSD2A', 'ABCG2']	0.000186582	0	0
21	22	Positive Regulation Of Gene Expression (GO:0010628)	1.58679e-06	2.98391	39.8465	['PRKAA1', 'BMPR2', 'TFRC', 'ROCK1', 'VSIR', 'RELA', 'CDH5', 'IFI16', 'SLC38A2', 'CD74', 'GSN', 'IFNGR1', 'STAT3', 'FN1', 'MSN', 'ACTA2', 'CLDN5', 'PLSCR1', 'TYROBP', 'PLXNB2', 'VIM', 'GAS6', 'CD46', 'EIF3D', 'HSPA1B', 'HSPA1A', 'ATF4', 'NFE2L2']	0.000197267	0	0
22	23	Transport Across Blood-Brain Barrier (GO:0150104)	1.82286e-06	7.00193	92.5312	['SLC7A5', 'SLC16A1', 'TFRC', 'SLCO2B1', 'INSR', 'SLC2A1', 'SLC2A3', 'SLC7A1', 'SLC38A2', 'MFSD2A', 'ABCG2']	0.000212225	0	0
23	24	Response To Interferon-Beta (GO:0035456)	1.9399e-06	14.8838	195.764	['IFITM3', 'BST2', 'IFITM1', 'PLSCR1', 'IFITM2', 'IFI16', 'IFNAR1']	0.000212225	0	0
24	25	Maintenance Of Blood-Brain Barrier (GO:0035633)	1.9399e-06	14.8838	195.764	['ITGB1', 'TJP1', 'CDH5', 'CLDN5', 'PECAM1', 'JAM2', 'MFSD2A']	0.000212225	0	0
25	26	Negative Regulation Of Membrane Protein Ectodomain Proteolysis (GO:0051045)	2.91558e-06	92.9834	1185.11	['ROCK1', 'TIMP2', 'TIMP3', 'TIMP1']	0.000306697	0	0
26	27	Antigen Processing And Presentation Of Exogenous Peptide Antigen (GO:0002478)	3.15053e-06	13.642	172.817	['HLA-DMB', 'FCER1G', 'HLA-DRA', 'HLA-A', 'HLA-DPA1', 'DNM2', 'HLA-E']	0.000319137	0	0
27	28	Positive Regulation Of Lymphocyte Proliferation (GO:0050671)	3.60647e-06	7.34601	92.0659	['CD74', 'ANXA1', 'HLA-DMB', 'TFRC', 'CD46', 'IL6ST', 'SLC7A1', 'HLA-DPA1', 'HLA-E', 'CD320']	0.000352275	0	0
28	29	Negative Regulation Of Cellular Process (GO:0048523)	4.7183e-06	2.74866	33.7098	['IFITM1', 'BMPR2', 'PTEN', 'FBLN1', 'ADAMTS1', 'PODXL', 'BCL7C', 'RACK1', 'TMEM109', 'IGFBP7', 'CCN2', 'S100A11', 'JAM2', 'TNS2', 'CD164', 'DUSP1', 'IGFBP3', 'PLAAT4', 'RHOB', 'BST2', 'PLXNB2', 'TXNIP', 'MYH9', 'ANP32B', 'NUPR1', 'HSPA1B', 'PLPP1', 'HSPA1A', 'VAMP3']	0.000444985	0	0
29	30	Actomyosin Structure Organization (GO:0031032)	5.20363e-06	7.016	85.3578	['ITGB1', 'TJP1', 'ROCK1', 'TMOD3', 'FLII', 'TPM1', 'ZYX', 'MYH9', 'MYL9', 'RHOA']	0.000474397	0	0
30	31	Cellular Response To Transforming Growth Factor Beta Stimulus (GO:0071560)	6.11324e-06	6.09236	73.1391	['ITGB1', 'CDH5', 'CLDN5', 'STAT3', 'ID1', 'ZYX', 'FOS', 'ZFP36L2', 'FERMT2', 'ENG', 'ZFP36L1']	0.000539345	0	0
31	32	Negative Regulation Of Smooth Muscle Cell Proliferation (GO:0048662)	1.10505e-05	10.9103	124.52	['BMPR2', 'IGFBP3', 'TPM1', 'PTEN', 'PDCD4', 'APOD', 'PRKG1']	0.000922771	0	0
32	33	Regulation Of Substrate Adhesion-Dependent Cell Spreading (GO:1900024)	1.1134e-05	8.71429	99.3909	['MYADM', 'ILK', 'FLNA', 'FBLN1', 'ACTN4', 'FERMT2', 'LIMS2', 'S100A10']	0.000922771	0	0
33	34	Negative Regulation Of Cellular Catabolic Process (GO:0031330)	1.16658e-05	7.28005	82.693	['ROCK1', 'STAT3', 'TIMP2', 'TIMP3', 'STK38L', 'TIMP1', 'NUPR1', 'MFSD2A', 'MCL1']	0.000938411	0	0
34	35	Regulation Of Tumor Necrosis Factor Production (GO:0032680)	1.72533e-05	4.91673	53.9243	['TYROBP', 'IFNGR1', 'MAPKAPK2', 'STAT3', 'HSPB1', 'CYBA', 'CD14', 'HMGB1', 'GAS6', 'VSIR', 'FOXP1', 'HLA-E']	0.00128852	0	0
35	36	Regulation Of Gene Expression (GO:0010468)	1.73061e-05	2.07646	22.7673	['PRKAA1', 'BMPR2', 'AHNAK', 'TFRC', 'ROCK1', 'ZNF22', 'LITAF', 'VSIR', 'RELA', 'AFF1', 'ZFP36L1', 'CDH5', 'IFI16', 'MIER1', 'RACK1', 'SLC38A2', 'CD74', 'MBNL1', 'GSN', 'IFNGR1', 'ZBTB38', 'INSR', 'STAT3', 'FN1', 'MSN', 'FOXN3', 'FOXP1', 'DNM2', 'ACTA2', 'SLC7A5', 'CLDN5', 'PLSCR1', 'TYROBP', 'CDK4', 'HNRNPH1', 'KAT6A', 'BHLHE40', 'MYADM', 'GAS6', 'CD46', 'HSPA1B', 'HSPA1A', 'ATF4', 'ENG', 'NFE2L…	0.00128852	0	0
36	37	Positive Regulation Of T Cell Activation (GO:0050870)	1.74316e-05	5.39123	59.0729	['XBP1', 'ANXA1', 'HLA-DMB', 'TFRC', 'HLA-DRA', 'HLA-A', 'IL6ST', 'CD46', 'B2M', 'SLC7A1', 'HLA-DPA1']	0.00128852	0	0
37	38	Transforming Growth Factor Beta Receptor Signaling Pathway (GO:0007179)	2.11474e-05	6.70055	72.1247	['ITGB1', 'CDH5', 'CLDN5', 'STAT3', 'ID1', 'ZYX', 'FOS', 'FERMT2', 'ENG']	0.00146644	0	0
38	39	Regulation Of Establishment Of Cell Polarity (GO:2000114)	2.12076e-05	19.4077	208.85	['PLEKHG3', 'CDH5', 'GSN', 'ROCK1', 'RACK1']	0.00146644	0	0
39	40	Transmembrane Receptor Protein Serine/Threonine Kinase Signaling Pathway (GO:0007178)	2.18405e-05	4.79099	51.4157	['ITGB1', 'FKBP1A', 'CDH5', 'CLDN5', 'BMPR2', 'ID1', 'STAT3', 'PDCD4', 'ZYX', 'FOS', 'FERMT2', 'ENG']	0.00146644	0	0
40	41	Apoptotic Cell Clearance (GO:0043277)	2.25193e-05	12.7271	136.194	['SCARB1', 'ANXA1', 'TYROBP', 'HMGB1', 'GAS6', 'TGM2']	0.00146644	0	0
41	42	Positive Regulation Of Fibroblast Proliferation (GO:0048146)	2.25193e-05	12.7271	136.194	['CD74', 'CDK4', 'FN1', 'S100A6', 'PDGFA', 'GAS6']	0.00146644	0	0
42	43	Positive Regulation Of Endopeptidase Activity (GO:0010950)	2.78879e-05	12.1731	127.663	['APH1A', 'STAT3', 'PSME1', 'PSME2', 'VSIR', 'PICALM']	0.0017738	0	0
43	44	Positive Regulation Of Stress Fiber Assembly (GO:0051496)	3.09907e-05	9.08911	94.3616	['ARHGEF10', 'TPM1', 'CCN2', 'SORBS3', 'RHOA', 'FERMT2', 'S100A10']	0.00189483	0	0
44	45	Positive Regulation Of Cellular Process (GO:0048522)	3.11764e-05	2.46398	25.5658	['PRKAA1', 'GRN', 'PTEN', 'PDGFA', 'PTN', 'RELA', 'GNAI2', 'ZFP36L1', 'IGF1R', 'BCL7C', 'NAMPT', 'TIMP1', 'CCN2', 'MFSD2A', 'TGM2', 'PDGFRB', 'XBP1', 'TSC22D1', 'CAVIN1', 'LAMB2', 'INSR', 'TPM1', 'FN1', 'TJP1', 'CLDN5', 'CDK4', 'NUPR1', 'CNOT8', 'IL6ST']	0.00189483	0	0
45	46	Regulation Of Viral Entry Into Host Cell (GO:0046596)	3.61862e-05	8.84301	90.436	['IFITM3', 'CD74', 'IFITM1', 'IFITM2', 'LGALS1', 'GSN', 'HMGB1']	0.00210573	0	0
46	47	Positive Regulation Of Leukocyte Cell-Cell Adhesion (GO:1903039)	3.61862e-05	8.84301	90.436	['HLA-DMB', 'ITGB2', 'HLA-DRA', 'RELA', 'RHOA', 'CD44', 'HLA-DPA1']	0.00210573	0	0
47	48	Positive Regulation Of Actin Nucleation (GO:0051127)	3.81441e-05	30.9881	315.278	['CYFIP1', 'FCHSD2', 'GSN', 'WASF2']	0.00214765	0	0
48	49	Regulation Of Integrin-Mediated Signaling Pathway (GO:2001044)	3.84771e-05	16.6335	169.087	['CD63', 'LAMB2', 'FLNA', 'TIMP1', 'LIMS2']	0.00214765	0	0
49	50	Leukocyte Cell-Cell Adhesion (GO:0007159)	4.17001e-05	11.1981	112.933	['ITGB1', 'ROCK1', 'ITGB2', 'PECAM1', 'MSN', 'JAM2']	0.002281	0	0
50	51	Positive Regulation Of Cell Population Proliferation (GO:0008284)	4.31345e-05	2.60876	26.2211	['GRN', 'PTEN', 'PDGFA', 'PTN', 'RELA', 'GNAI2', 'IGF1R', 'BCL7C', 'NAMPT', 'TIMP1', 'PDGFRB', 'CD74', 'XBP1', 'TSC22D1', 'INSR', 'FN1', 'FOXP1', 'BST2', 'TJP1', 'CLDN5', 'CDK4', 'S100A6', 'GAS6', 'CNOT8', 'IL6ST']	0.00231319	0	0
51	52	Negative Regulation Of Cell Migration (GO:0030336)	4.73147e-05	4.08617	40.6929	['CD74', 'IFITM1', 'CLIC4', 'IGFBP3', 'TPM1', 'PTEN', 'PTPRG', 'RHOB', 'BST2', 'CLDN5', 'ARHGDIB', 'TIMP1', 'ENG']	0.00248857	0	0
52	53	Microglial Cell Activation (GO:0001774)	5.04109e-05	15.5238	153.613	['C1QA', 'GRN', 'TYROBP', 'IFNGR1', 'ITGB2']	0.00255322	0	0
53	54	Negative Regulation Of Viral Life Cycle (GO:1903901)	5.04109e-05	15.5238	153.613	['IFITM3', 'BST2', 'IFITM1', 'GSN', 'IFITM2']	0.00255322	0	0
54	55	Regulation Of Interleukin-8 Production (GO:0032677)	5.47853e-05	5.86028	57.5015	['CD74', 'ANXA1', 'TMSB4X', 'STAT3', 'HMGB1', 'CD14', 'RELA', 'HSPA1B', 'HSPA1A']	0.00272433	0	0
55	56	Regulation Of Autophagy (GO:0010506)	6.21503e-05	3.3643	32.5865	['CTSA', 'PRKAA1', 'ATP6V0E1', 'ROCK1', 'STAT3', 'HSPB1', 'HMGB1', 'PIK3C2A', 'DCN', 'DEPP1', 'GFAP', 'IFI16', 'STK38L', 'NUPR1', 'SNX6', 'MCL1']	0.00303538	0	0
56	57	Antigen Processing And Presentation Of Endogenous Peptide Antigen (GO:0002483)	6.50146e-05	14.5528	140.302	['TAP2', 'HLA-C', 'HLA-DRA', 'HLA-A', 'HLA-E']	0.00311956	0	0
57	58	Positive Regulation Of T Cell Proliferation (GO:0042102)	6.81017e-05	6.56923	63.0285	['ANXA1', 'HLA-DMB', 'TFRC', 'HMGB1', 'CD46', 'IL6ST', 'SLC7A1', 'HLA-DPA1']	0.00321135	0	0
58	59	Positive Regulation Of Apoptotic Process (GO:0043065)	7.13873e-05	3.18215	30.3812	['ITGB1', 'GRN', 'GADD45B', 'PRMT2', 'IGFBP3', 'HMGB1', 'CFLAR', 'RHOB', 'DNM2', 'LGALS1', 'RACK1', 'MAP3K20', 'ITGA6', 'NUPR1', 'ATF4', 'TGM2', 'MCL1']	0.00329001	0	0
59	60	Positive Regulation Of Neuron Death (GO:1901216)	7.21757e-05	9.99676	95.3332	['C1QA', 'GRN', 'TYROBP', 'ITGB2', 'NUPR1', 'PICALM']	0.00329001	0	0
60	61	Positive Regulation Of Programmed Cell Death (GO:0043068)	7.55178e-05	3.30485	31.3668	['ITGB1', 'GADD45B', 'PRMT2', 'IGFBP3', 'LAPTM5', 'HMGB1', 'CFLAR', 'RHOB', 'DNM2', 'LGALS1', 'RACK1', 'MAP3K20', 'ITGA6', 'ATF4', 'TGM2', 'MCL1']	0.00338592	0	0
61	62	Positive Regulation Of Endothelial Cell Migration (GO:0010595)	8.02415e-05	5.5507	52.3457	['SCARB1', 'GRN', 'BMPR2', 'SPARC', 'TMSB4X', 'HSPB1', 'HMGB1', 'FOXP1', 'RHOB']	0.00353969	0	0
62	63	Cellular Response To Low-Density Lipoprotein Particle Stimulus (GO:0071404)	8.26753e-05	13.6961	128.751	['ITGB1', 'FCER1G', 'ITGB2', 'CD9', 'CD68']	0.00358916	0	0
63	64	Regulation Of Viral Genome Replication (GO:0045069)	8.48094e-05	6.34589	59.4934	['IFITM3', 'BST2', 'IFITM1', 'PLSCR1', 'IFITM2', 'IFI16', 'ISG15', 'PABPC1']	0.00360009	0	0
64	65	Positive Regulation Of Substrate Adhesion-Dependent Cell Spreading (GO:1900026)	8.55597e-05	9.65155	90.3993	['MYADM', 'ILK', 'FLNA', 'FERMT2', 'LIMS2', 'S100A10']	0.00360009	0	0
65	66	Negative Regulation Of Complement Activation (GO:0045916)	8.69215e-05	23.2387	217.294	['SERPING1', 'VSIG4', 'CD46', 'CD55']	0.00360197	0	0
66	67	Humoral Immune Response Mediated By Circulating Immunoglobulin (GO:0002455)	9.23001e-05	69.5723	646.359	['C1QB', 'C1R', 'C1QC']	0.0037626	0	0
67	68	Cell-Cell Junction Organization (GO:0045216)	9.43579e-05	6.23981	57.8331	['TJP1', 'CDH5', 'CLDN5', 'CTNND1', 'MYADM', 'CSK', 'TLN1', 'LIMS2']	0.0037626	0	0
68	69	Receptor Internalization (GO:0031623)	9.62094e-05	7.4335	68.7524	['ITGB1', 'FCER1G', 'TFRC', 'ITGB2', 'CD9', 'DNM2', 'PICALM']	0.0037626	0	0
69	70	Regulation Of Type II Interferon Production (GO:0032649)	9.63005e-05	5.40782	50.0117	['SLC7A5', 'LAPTM5', 'ISG15', 'HMGB1', 'HLA-A', 'CD14', 'GAS6', 'VSIR', 'HLA-DPA1']	0.0037626	0	0
70	71	Substrate Adhesion-Dependent Cell Spreading (GO:0034446)	0.000100847	9.32936	85.8479	['LAMA5', 'FN1', 'ILK', 'RHOA', 'FERMT2', 'VAMP3']	0.00388473	0	0
71	72	Cellular Response To Cytokine Stimulus (GO:0071345)	0.000114262	2.94103	26.6958	['XBP1', 'IFITM2', 'DUSP1', 'STAT3', 'RHOA', 'RELA', 'ZFP36L2', 'ZFP36L1', 'TNFRSF1A', 'NFKBIA', 'MT2A', 'IFI16', 'TPR', 'GAS6', 'IL6ST', 'HLA-DPA1', 'IFNAR1', 'NFE2L2']	0.00434035	0	0
72	73	Cellular Response To Growth Factor Stimulus (GO:0071363)	0.000122175	3.94832	35.5746	['RAP1A', 'BMPR2', 'ANXA1', 'MAPKAPK2', 'RACK1', 'HSPB1', 'IQGAP1', 'PTPN12', 'ZFP36L2', 'CD44', 'RELA', 'ZFP36L1']	0.00456471	0	0
73	74	Negative Regulation Of Viral Genome Replication (GO:0045071)	0.000123506	7.10958	63.9807	['IFITM3', 'BST2', 'IFITM1', 'PLSCR1', 'IFITM2', 'IFI16', 'ISG15']	0.00456471	0	0
74	75	Cell-Cell Junction Assembly (GO:0007043)	0.000128488	5.94176	53.2362	['TJP1', 'CDH5', 'CLDN5', 'CTNND1', 'CTNNA1', 'CD9', 'TLN1', 'RHOA']	0.00468554	0	0
75	76	Positive Regulation Of Phosphorylation (GO:0042327)	0.000133996	3.27896	29.2408	['PDGFRB', 'CD74', 'TFRC', 'FAXDC2', 'INSR', 'RARRES2', 'ILK', 'MOB3B', 'IGF1R', 'MOB1A', 'RACK1', 'PECAM1', 'ITGA6', 'GAS6', 'ENG']	0.00482209	0	0
76	77	Negative Regulation Of Epithelial Cell Apoptotic Process (GO:1904036)	0.000137901	8.74538	77.7375	['CAST', 'CDH5', 'PRKAA1', 'NUPR1', 'GAS6', 'NFE2L2']	0.0048239	0	0
77	78	Regulation Of Focal Adhesion Assembly (GO:0051893)	0.000139338	6.95796	61.777	['ROCK1', 'PTEN', 'APOD', 'TLN1', 'RHOA', 'FERMT2', 'S100A10']	0.0048239	0	0
78	79	Negative Regulation Of Protein Catabolic Process (GO:0042177)	0.000139338	6.95796	61.777	['CTSA', 'NQO1', 'ROCK1', 'TIMP2', 'TIMP3', 'FLNA', 'TIMP1']	0.0048239	0	0
79	80	Response To Lipopolysaccharide (GO:0032496)	0.000155478	3.84009	33.6738	['SCARB1', 'XBP1', 'MAPKAPK2', 'PDCD4', 'CD14', 'HMGB1', 'VIM', 'CD68', 'RHOA', 'RELA', 'FOXP1', 'IFNAR1']	0.00521524	0	0
80	81	Regulation Of Protein Kinase B Signaling (GO:0051896)	0.000158208	4.1343	36.1817	['ITGB1', 'HIP1', 'INSR', 'PTEN', 'RACK1', 'PDGFA', 'GAS6', 'NOP53', 'FERMT2', 'IGF1R', 'ENG']	0.00521524	0	0
81	82	Cellular Response To Hexose Stimulus (GO:0071331)	0.000158269	11.6399	101.863	['PRKAA1', 'XBP1', 'RACK1', 'GAS6', 'IGF1R']	0.00521524	0	0
82	83	Wound Healing, Spreading Of Cells (GO:0044319)	0.000158269	11.6399	101.863	['ITGB1', 'CD151', 'FLNA', 'RHOA', 'CD44']	0.00521524	0	0
83	84	Establishment Of Mitotic Sister Chromatid Cohesion (GO:0034087)	0.000181685	46.3791	399.474	['STAG1', 'STAG2', 'SMC3']	0.00591559	0	0
84	85	Endothelial Cell Migration (GO:0043542)	0.000184987	8.2301	70.7396	['CDH5', 'ID1', 'RAB13', 'MYH9', 'FSTL1', 'RHOA']	0.00595222	0	0
85	86	Cell Junction Assembly (GO:0034329)	0.000190051	4.90276	42.0079	['TJP1', 'CDH5', 'CLDN5', 'CTNND1', 'PTEN', 'FN1', 'ITGA6', 'TLN1', 'RHOA']	0.00604406	0	0
86	87	Antigen Processing And Presentation Of Exogenous Peptide Antigen Via MHC Class II (GO:0019886)	0.000192555	11.085	94.8339	['HLA-DMB', 'FCER1G', 'HLA-DRA', 'HLA-DPA1', 'DNM2']	0.00605332	0	0
87	88	Regulation Of Phagocytosis (GO:0050764)	0.000219941	6.41092	53.9937	['SCARB1', 'PLSCR1', 'FCER1G', 'RACK1', 'CYBA', 'GAS6', 'TGM2']	0.00683567	0	0
88	89	Regulation Of T Cell Proliferation (GO:0042129)	0.000227501	5.42342	45.4936	['ANXA1', 'HLA-DMB', 'TFRC', 'VSIG4', 'CD46', 'IL6ST', 'SLC7A1', 'HLA-DPA1']	0.00692434	0	0
89	90	Epiboly Involved In Wound Healing (GO:0090505)	0.000227858	16.8983	141.722	['CD151', 'FLNA', 'RHOA', 'CD44']	0.00692434	0	0
90	91	Positive Regulation Of Response To Wounding (GO:1903036)	0.000232224	10.5806	88.5367	['ITGB1', 'GRN', 'ANXA1', 'PTN', 'MYLK']	0.00697947	0	0
91	92	Negative Regulation Of Protein Modification Process (GO:0031400)	0.000248873	5.34567	44.3614	['PRKAA1', 'CRTAP', 'IGFBP3', 'DNAJC10', 'PTEN', 'MYADM', 'TSPO', 'FBLN1']	0.007319	0	0
92	93	Positive Regulation Of Tumor Necrosis Factor Production (GO:0032760)	0.000248873	5.34567	44.3614	['TYROBP', 'IFNGR1', 'STAT3', 'HSPB1', 'CYBA', 'HMGB1', 'CD14', 'HLA-E']	0.007319	0	0
93	94	Actin Filament Organization (GO:0007015)	0.000261201	3.88402	32.044	['HIP1', 'GSN', 'WIPF1', 'ACTN1', 'TPM2', 'FLII', 'TPM1', 'PLS3', 'FLNA', 'TAGLN2', 'CGNL1']	0.00751985	0	0
94	95	Regulation Of Cell Adhesion (GO:0030155)	0.000261201	3.88402	32.044	['CD164', 'ROCK1', 'PODXL', 'DUSP1', 'LAMB2', 'TPM1', 'MYADM', 'PLXNB2', 'FBLN1', 'CYTH1', 'TGM2']	0.00751985	0	0
95	96	Antigen Processing And Presentation Of Peptide Antigen Via MHC Class II (GO:0002495)	0.000277812	10.1201	82.869	['HLA-DMB', 'FCER1G', 'HLA-DRA', 'HLA-DPA1', 'DNM2']	0.00783315	0	0
96	97	Establishment Of Endothelial Barrier (GO:0061028)	0.000277812	10.1201	82.869	['TJP1', 'RAP1A', 'MYADM', 'PECAM1', 'MSN']	0.00783315	0	0
97	98	Positive Regulation Of Immune Response (GO:0050778)	0.000296553	5.19664	42.2138	['CD74', 'PLSCR1', 'XBP1', 'HLA-DMB', 'ITGB2', 'HLA-DRA', 'CD46', 'IL6ST']	0.00818276	0	0
98	99	Regulation Of Establishment Of Endothelial Barrier (GO:1903140)	0.000298732	15.4893	125.711	['CDH5', 'CLDN5', 'ROCK1', 'TNFRSF1A']	0.00818276	0	0
99	100	Negative Regulation Of Viral Process (GO:0048525)	0.000302179	6.05383	49.0632	['IFITM3', 'BST2', 'IFITM1', 'PLSCR1', 'IFITM2', 'IFI16', 'ISG15']	0.00818276	0	0
100	101	Positive Regulation Of Interleukin-8 Production (GO:0032757)	0.000302179	6.05383	49.0632	['CD74', 'STAT3', 'HMGB1', 'CD14', 'RELA', 'HSPA1B', 'HSPA1A']	0.00818276	0	0
101	102	Cellular Response To Interferon-Alpha (GO:0035457)	0.000312934	34.7826	280.679	['TPR', 'GAS6', 'IFNAR1']	0.00830946	0	0
102	103	Positive Regulation Of Arp2/3 Complex-Mediated Actin Nucleation (GO:2000601)	0.000312934	34.7826	280.679	['CYFIP1', 'FCHSD2', 'WASF2']	0.00830946	0	0
103	104	Mitotic Spindle Assembly (GO:0090307)	0.00031671	7.36227	59.3216	['ARHGEF10', 'STAG1', 'STAG2', 'FLNA', 'SMC3', 'RHOA']	0.00832886	0	0
104	105	Spindle Assembly (GO:0051225)	0.000323049	5.12519	41.1948	['ARHGEF10', 'STAG1', 'STAG2', 'NEK7', 'FLNA', 'SMC3', 'MAPRE1', 'RHOA']	0.00841465	0	0
105	106	Integrated Stress Response Signaling (GO:0140467)	0.00032988	9.69792	77.7461	['CEBPD', 'MAP3K20', 'FOS', 'JUNB', 'NFE2L2']	0.00846032	0	0
106	107	Defense Response To Symbiont (GO:0140546)	0.000330989	3.76984	30.2094	['IFITM3', 'BST2', 'IFITM1', 'PLSCR1', 'IFITM2', 'IFI27', 'IFI16', 'CARD8', 'ISG15', 'RNASE1', 'RELA']	0.00846032	0	0
107	108	Positive Regulation Of Protein Modification Process (GO:0031401)	0.000344164	3.12607	24.9285	['CD74', 'TFRC', 'FAXDC2', 'INSR', 'RARRES2', 'ILK', 'PPP2R5A', 'MOB3B', 'CDH5', 'MOB1A', 'RACK1', 'PECAM1', 'GAS6', 'ENG']	0.00865943	0	0
108	109	Negative Regulation Of DNA-binding Transcription Factor Activity (GO:0043433)	0.000350697	3.74233	29.7725	['NFKBIA', 'PRMT2', 'TMSB4X', 'CARD8', 'BHLHE40', 'ID1', 'ID3', 'FLNA', 'NUPR1', 'COMMD6', 'GAS6']	0.00865943	0	0
109	110	Regulation Of Phosphorylation (GO:0042325)	0.000351443	5.05567	40.2101	['CDH5', 'ROCK1', 'FN1', 'HSPB1', 'ILK', 'PLXNB2', 'ITGA6', 'NOP53']	0.00865943	0	0
110	111	Positive Regulation Of Tumor Necrosis Factor Superfamily Cytokine Production (GO:1903557)	0.000351443	5.05567	40.2101	['TYROBP', 'IFNGR1', 'STAT3', 'HSPB1', 'CYBA', 'HMGB1', 'CD14', 'HLA-E']	0.00865943	0	0
111	112	Positive Regulation Of I-kappaB kinase/NF-kappaB Signaling (GO:0043123)	0.000377442	3.4603	27.2744	['BST2', 'FKBP1A', 'CD74', 'LGALS1', 'TFRC', 'MIER1', 'FLNA', 'CFLAR', 'LITAF', 'RHOA', 'RELA', 'TNFRSF1A']	0.009217	0	0
112	113	Negative Regulation Of Vascular Associated Smooth Muscle Cell Proliferation (GO:1904706)	0.000384125	14.2971	112.44	['TPM1', 'PTEN', 'PDCD4', 'PRKG1']	0.00925163	0	0
113	114	Response To Epidermal Growth Factor (GO:0070849)	0.000389008	9.30952	73.0975	['TPR', 'IQGAP1', 'PTPN12', 'ZFP36L2', 'ZFP36L1']	0.00925163	0	0
114	115	Immunoglobulin Mediated Immune Response (GO:0016064)	0.000389008	9.30952	73.0975	['CD74', 'HLA-DMB', 'FCER1G', 'HLA-DRA', 'HLA-DPA1']	0.00925163	0	0
115	116	Regulation Of Fibroblast Proliferation (GO:0048145)	0.000405496	6.99344	54.6215	['CD74', 'CDK4', 'FN1', 'S100A6', 'PDGFA', 'GAS6']	0.00939858	0	0
116	117	Regulation Of Interleukin-10 Production (GO:0032653)	0.000405496	6.99344	54.6215	['TYROBP', 'STAT3', 'ISG15', 'HMGB1', 'CD46', 'VSIR']	0.00939858	0	0
117	118	Myofibril Assembly (GO:0030239)	0.000405496	6.99344	54.6215	['PDGFRB', 'FLII', 'TMOD3', 'TPM1', 'CFLAR', 'MYL9']	0.00939858	0	0
118	119	Negative Regulation Of Cytokine Production (GO:0001818)	0.000440191	3.39724	26.2549	['SRGN', 'TYROBP', 'ANXA1', 'TMSB4X', 'FN1', 'LAPTM5', 'PDCD4', 'APOD', 'VSIG4', 'HMGB1', 'GAS6', 'VSIR']	0.010117	0	0
119	120	Regulation Of I-kappaB kinase/NF-kappaB Signaling (GO:0043122)	0.000468283	3.0246	23.1879	['CD74', 'TFRC', 'CARD8', 'HSPB1', 'CFLAR', 'LITAF', 'RHOA', 'RELA', 'TNFRSF1A', 'BST2', 'FKBP1A', 'LGALS1', 'MIER1', 'FLNA']	0.010673	0	0
120	121	Regulation Of Establishment Or Maintenance Of Cell Polarity (GO:0032878)	0.000485632	13.2752	101.291	['PLEKHG3', 'CDH5', 'ROCK1', 'RACK1']	0.0107826	0	0
121	122	Antigen Processing And Presentation Of Peptide Antigen Via MHC Class I (GO:0002474)	0.000485632	13.2752	101.291	['FCER1G', 'TAP2', 'HLA-A', 'B2M']	0.0107826	0	0
122	123	Negative Regulation Of Viral Entry Into Host Cell (GO:0046597)	0.000485632	13.2752	101.291	['IFITM3', 'IFITM1', 'GSN', 'IFITM2']	0.0107826	0	0
123	124	Negative Regulation Of Endopeptidase Activity (GO:0010951)	0.000492577	5.53937	42.1871	['SERPINA3', 'IFI16', 'TIMP2', 'TIMP3', 'SERPING1', 'TIMP1', 'SERPINB6']	0.0107826	0	0
124	125	Positive Regulation Of Tumor Necrosis Factor-Mediated Signaling Pathway (GO:1903265)	0.000492804	27.8246	211.896	['LAPTM5', 'HSPA1B', 'HSPA1A']	0.0107826	0	0
125	126	Regulation Of Tumor Necrosis Factor-Mediated Signaling Pathway (GO:0010803)	0.000512607	6.65973	50.4541	['CARD8', 'MAPKAPK2', 'LAPTM5', 'GAS6', 'HSPA1B', 'HSPA1A']	0.0111268	0	0
126	127	Phosphatidylinositol 3-Kinase Signaling (GO:0014065)	0.000530871	8.61905	64.9962	['STAT3', 'PTEN', 'PIK3C2A', 'IGF1R', 'ZFP36L1']	0.0113579	0	0
127	128	Cell-Matrix Adhesion (GO:0007160)	0.000531557	4.21334	31.7673	['ITGB1', 'CD63', 'ITGB2', 'FN1', 'ZYX', 'ILK', 'ITGA6', 'FERMT2', 'CD44']	0.0113579	0	0
128	129	Negative Regulation Of Cell Motility (GO:2000146)	0.000558574	3.81076	28.543	['BST2', 'CLDN5', 'CD74', 'IFITM1', 'CLIC4', 'TPM1', 'PTEN', 'FBLN1', 'RHOB', 'ENG']	0.0118426	0	0
129	130	Regulation Of Endothelial Cell Migration (GO:0010594)	0.000567581	4.67506	34.942	['SCARB1', 'GRN', 'BMPR2', 'SPARC', 'PTN', 'DCN', 'FOXP1', 'RHOB']	0.011941	0	0
130	131	Interferon-Mediated Signaling Pathway (GO:0140888)	0.000573804	6.50452	48.5447	['IFITM3', 'IFITM1', 'IFITM2', 'IFI27', 'IFNGR1', 'IFNAR1']	0.0119798	0	0
131	132	Regulation Of Smooth Muscle Cell Migration (GO:0014910)	0.000604874	12.3895	91.8126	['PDGFRB', 'IGFBP3', 'PDGFA', 'S100A11']	0.0124386	0	0
132	133	Positive Regulation Of Alpha-Beta T Cell Activation (GO:0046635)	0.000604874	12.3895	91.8126	['HLA-DRA', 'HLA-A', 'CD55', 'HLA-E']	0.0124386	0	0
133	134	Cellular Response To Chemical Stress (GO:0062197)	0.000612284	4.61711	34.1588	['NQO1', 'PRKAA1', 'ZFP36L2', 'HSPA1B', 'SERPINB6', 'ATF4', 'HSPA1A', 'NFE2L2']	0.0124567	0	0
134	135	Positive Regulation Of Cytokine Production Involved In Immune Response (GO:0002720)	0.000614864	8.3108	61.451	['SLC7A5', 'LAPTM5', 'HLA-A', 'CD55', 'HLA-E']	0.0124567	0	0
135	136	Positive Regulation Of Cell Death (GO:0010942)	0.000640523	6.35637	46.7398	['HEBP2', 'C1QA', 'TYROBP', 'ITGB2', 'MAP3K20', 'PICALM']	0.0128811	0	0
136	137	Regulation Of Phosphatidylinositol 3-Kinase Signaling (GO:0014066)	0.000659786	4.56057	33.3997	['PDGFRB', 'INSR', 'PTEN', 'FN1', 'PDGFA', 'NOP53', 'DCN', 'IGF1R']	0.0130963	0	0
137	138	Regulation Of Intracellular Signal Transduction (GO:1902531)	0.000660799	2.68604	19.6674	['PLEKHG3', 'ARHGEF10', 'SGMS1', 'VWF', 'CARD8', 'SWAP70', 'PTEN', 'HSPB1', 'RELA', 'MOB3B', 'AKAP12', 'NFKBIA', 'TMSB4X', 'KAT6A', 'ARHGEF1', 'NOP53']	0.0130963	0	0
138	139	Negative Regulation Of Extrinsic Apoptotic Signaling Pathway (GO:2001237)	0.000705137	5.1866	37.6398	['TMBIM1', 'ITGA6', 'CFLAR', 'RELA', 'HSPA1B', 'MCL1', 'HSPA1A']	0.0137415	0	0
139	140	Cellular Response To Glucose Stimulus (GO:0071333)	0.000708431	8.02381	58.1923	['PRKAA1', 'XBP1', 'RACK1', 'GAS6', 'IGF1R']	0.0137415	0	0
140	141	Cellular Response To Hydrogen Peroxide (GO:0070301)	0.000708431	8.02381	58.1923	['ANXA1', 'CAT', 'RELA', 'RHOB', 'NFE2L2']	0.0137415	0	0
141	142	Regulation Of Cytoskeleton Organization (GO:0051493)	0.000736541	4.01168	28.9384	['PDGFRB', 'BST2', 'TJP1', 'CLIC4', 'PRKAA1', 'ROCK1', 'PDGFA', 'SORBS3', 'RHOA']	0.0141212	0	0
142	143	Endothelial Cell Development (GO:0001885)	0.00074349	11.6146	83.6734	['RAP1A', 'MYADM', 'PECAM1', 'MSN']	0.0141212	0	0
143	144	Negative Regulation Of Protein Localization To Plasma Membrane (GO:1903077)	0.00074349	11.6146	83.6734	['TMBIM1', 'PPP2R5A', 'CSK', 'PICALM']	0.0141212	0	0
144	145	Positive Regulation Of Cell-Substrate Adhesion (GO:0010811)	0.000768209	5.1053	36.6124	['MYADM', 'FN1', 'ILK', 'FLNA', 'FERMT2', 'LIMS2', 'S100A10']	0.01449	0	0
145	146	Positive Regulation Of Protein Kinase B Signaling (GO:0051897)	0.000820384	4.39893	31.2576	['ITGB1', 'HIP1', 'INSR', 'PDGFA', 'GAS6', 'FERMT2', 'IGF1R', 'ENG']	0.0153682	0	0
146	147	Protein Localization To Membrane (GO:0072657)	0.000861856	3.13075	22.0919	['SLC9A3R2', 'TSPAN14', 'RAP1A', 'ROCK1', 'ITGB2', 'RAB13', 'FLNA', 'PTN', 'GAS6', 'FERMT2', 'S100A10', 'TNFRSF1A']	0.0160352	0	0
147	148	Cellular Response To Oxidative Stress (GO:0034599)	0.000887716	3.89964	27.4022	['NQO1', 'PRKAA1', 'TPM1', 'FOS', 'ZFP36L2', 'HSPA1B', 'ATF4', 'NFE2L2', 'HSPA1A']	0.0164047	0	0
148	149	Regulation Of Membrane Protein Ectodomain Proteolysis (GO:0051043)	0.000903132	10.9308	76.6212	['ROCK1', 'TIMP2', 'TIMP3', 'TIMP1']	0.0165776	0	0
149	150	Protein Localization To Cell Periphery (GO:1990778)	0.000929305	3.54929	24.7778	['SLC9A3R2', 'TSPAN14', 'RAP1A', 'ROCK1', 'RAB13', 'MYADM', 'FLNA', 'GAS6', 'S100A10', 'TNFRSF1A']	0.0169443	0	0
150	151	Apical Junction Assembly (GO:0043297)	0.000969429	5.82548	40.4218	['CDH5', 'CLDN5', 'RAB13', 'PECAM1', 'CTNNA1', 'RHOA']	0.0175589	0	0
151	152	Cellular Response To Tumor Necrosis Factor (GO:0071356)	0.00100183	3.82834	26.4383	['NFKBIA', 'TMSB4X', 'ILK', 'ACTN4', 'ZFP36L2', 'RELA', 'ZFP36L1', 'NFE2L2', 'TNFRSF1A']	0.0180263	0	0
152	153	Type I Interferon-Mediated Signaling Pathway (GO:0060337)	0.00105335	7.27046	49.8447	['IFITM3', 'IFITM1', 'IFITM2', 'IFI27', 'IFNAR1']	0.0187073	0	0
153	154	Regulation Of Cellular Component Biogenesis (GO:0044087)	0.00105335	7.27046	49.8447	['TJP1', 'RAP1A', 'ROCK1', 'MSN', 'GFAP']	0.0187073	0	0
154	155	Response To Peptide Hormone (GO:0043434)	0.00106894	5.7063	39.0373	['XBP1', 'ANXA1', 'ROCK1', 'STAT3', 'SLC2A1', 'ZFP36L1']	0.0188616	0	0
155	156	Positive Regulation Of Cell Differentiation (GO:0045597)	0.00113475	2.63565	17.8732	['IFITM1', 'XBP1', 'BMPR2', 'LAMB2', 'IGFBP3', 'RARRES2', 'ADIRF', 'PTN', 'RHOA', 'ZFP36L1', 'ZEB1', 'RAP1A', 'CCN2', 'IL6ST', 'FERMT2']	0.0198946	0	0
156	157	Protein Transport (GO:0015031)	0.00115012	2.53923	17.1852	['CTSA', 'CD74', 'TFRC', 'ARRDC3', 'LAPTM5', 'SEPTIN9', 'DNAJC15', 'SCAMP2', 'PDIA4', 'HSP90B1', 'DNM2', 'RAB13', 'TXNIP', 'MYH9', 'VAMP5', 'SNX6']	0.0200354	0	0
157	158	Cellular Response To Type I Interferon (GO:0071357)	0.00119206	7.04978	47.4597	['IFITM3', 'IFITM1', 'IFITM2', 'IFI27', 'IFNAR1']	0.0203005	0	0
158	159	Tumor Necrosis Factor-Mediated Signaling Pathway (GO:0033209)	0.00119206	7.04978	47.4597	['NFKBIA', 'TMSB4X', 'ILK', 'RELA', 'TNFRSF1A']	0.0203005	0	0
159	160	Positive Regulation Of Production Of Molecular Mediator Of Immune Response (GO:0002702)	0.00119206	7.04978	47.4597	['SLC7A5', 'XBP1', 'LAPTM5', 'HLA-E', 'VAMP3']	0.0203005	0	0
160	161	Receptor-Mediated Endocytosis (GO:0006898)	0.00119502	3.72613	25.0753	['ITGB1', 'FCER1G', 'FCHSD2', 'TFRC', 'INSR', 'ITGB2', 'CD9', 'PICALM', 'DNM2']	0.0203005	0	0
161	162	Cellular Response To Insulin Stimulus (GO:0032869)	0.00123542	4.10762	27.5061	['XBP1', 'INSR', 'RARRES2', 'NAMPT', 'RAB13', 'PIK3C2A', 'IGF1R', 'ZFP36L1']	0.0208572	0	0
162	163	Regulation Of Cell Motility (GO:2000145)	0.00126572	3.69326	24.6418	['PLEKHG3', 'ROCK1', 'CAVIN1', 'TMSB4X', 'PLXNB2', 'FLNA', 'FBLN1', 'RHOA', 'RHOB']	0.0210354	0	0
163	164	Supramolecular Fiber Organization (GO:0097435)	0.0012697	2.51345	16.7621	['CRTAP', 'HIP1', 'GSN', 'ACTN1', 'FLII', 'TMOD3', 'TPM2', 'TPM1', 'RHOA', 'GFAP', 'FKBP1A', 'TAGLN2', 'VIM', 'B2M', 'MYL9', 'CGNL1']	0.0210354	0	0
164	165	Negative Regulation Of Actin Filament Polymerization (GO:0030837)	0.00129212	9.77922	65.0462	['GSN', 'TMSB4X', 'MYADM', 'PFN1']	0.0210354	0	0
165	166	Positive Regulation Of Neuron Apoptotic Process (GO:0043525)	0.00129212	9.77922	65.0462	['GRN', 'TYROBP', 'NUPR1', 'MCL1']	0.0210354	0	0
166	167	Protein N-linked Glycosylation Via Asparagine (GO:0018279)	0.00129212	9.77922	65.0462	['ST6GAL1', 'STT3A', 'MGAT1', 'MAGT1']	0.0210354	0	0
167	168	Regulation Of Cell Junction Assembly (GO:1901888)	0.00129212	9.77922	65.0462	['TJP1', 'RAP1A', 'ROCK1', 'PDLIM5']	0.0210354	0	0
168	169	Negative Regulation Of Protein Phosphorylation (GO:0001933)	0.00134019	3.36933	22.288	['DNAJC3', 'IGFBP3', 'DNAJC10', 'MYADM', 'PTEN', 'RACK1', 'HSPB1', 'PMEPA1', 'FBLN1', 'ENG']	0.0216889	0	0
169	170	Protein Modification Process (GO:0036211)	0.00136941	1.95085	12.8627	['PRKAA1', 'BMPR2', 'ROCK1', 'PTEN', 'ILK', 'UBE2L6', 'PTPRG', 'MKNK2', 'MAP3K20', 'STK38L', 'CSK', 'PRKG1', 'TGM2', 'ANXA1', 'DMPK', 'IGFBP3', 'INSR', 'NEK7', 'FN1', 'PPP2R5A', 'PTPN12', 'HIPK3', 'PTPRB', 'CDK4', 'CTDSP2', 'MAPKAPK2', 'STT3A', 'GAS6']	0.0220164	0	0
170	171	Regulation Of Response To Oxidative Stress (GO:1902882)	0.00138458	17.3877	114.452	['HEBP2', 'SELENON', 'NFE2L2']	0.0220164	0	0
171	172	Regulation Of Amyloid Precursor Protein Catabolic Process (GO:1902991)	0.00138458	17.3877	114.452	['FKBP1A', 'ROCK1', 'PICALM']	0.0220164	0	0
172	173	Positive Regulation Of Hydrolase Activity (GO:0051345)	0.00139852	3.1256	20.5425	['ITGB1', 'RAP1A', 'ROCK1', 'DOCK9', 'RACK1', 'ITGA6', 'FERMT2', 'RHOA', 'TGM2', 'S100A10', 'PICALM']	0.0221095	0	0
173	174	Positive Regulation Of Cytoskeleton Organization (GO:0051495)	0.00144872	4.53618	29.6534	['FCHSD2', 'GSN', 'CDC42EP4', 'SYNPO2', 'CDC42EP1', 'PFN1', 'SORBS3']	0.0227716	0	0
174	175	Positive Regulation Of Wound Healing (GO:0090303)	0.00150937	6.64626	43.1745	['ITGB1', 'XBP1', 'ANXA1', 'FERMT2', 'MYLK']	0.0235263	0	0
175	176	Regulation Of Angiogenesis (GO:0045765)	0.00151394	2.91791	18.9461	['ITGB1', 'CLDN5', 'CDH5', 'XBP1', 'GRN', 'SPARC', 'ROCK1', 'ADAMTS1', 'HSPB1', 'ANGPTL4', 'DCN', 'RHOB']	0.0235263	0	0
176	177	Response To Type II Interferon (GO:0034341)	0.00155921	4.47382	28.9169	['IFITM3', 'BST2', 'CD74', 'IFITM1', 'IFITM2', 'CALCOCO2', 'HLA-DPA1']	0.0240928	0	0
177	178	Negative Regulation Of Peptidase Activity (GO:0010466)	0.00168901	5.17661	33.0455	['SERPINA3', 'TIMP2', 'TIMP3', 'SERPING1', 'TIMP1', 'SERPINB6']	0.0259519	0	0
178	179	Protein Stabilization (GO:0050821)	0.00171137	2.87281	18.3011	['GRN', 'CRTAP', 'HIP1', 'TYROBP', 'CTNND1', 'PTEN', 'FLNA', 'MFSD1', 'PFN1', 'NOP53', 'HSPA1B', 'HSPA1A']	0.0260203	0	0
179	180	Positive Regulation Of Signal Transduction (GO:0009967)	0.00175101	2.61192	16.5793	['CD63', 'CD74', 'XBP1', 'VWF', 'LAMB2', 'STAT3', 'PTEN', 'ILK', 'SULF2', 'TSPAN14', 'FLNA', 'GAS6', 'IL6ST', 'LIMS2']	0.0260203	0	0
180	181	Negative Regulation Of Response To Endoplasmic Reticulum Stress (GO:1903573)	0.00178507	8.84696	55.9862	['XBP1', 'RACK1', 'HERPUD1', 'HSPA1A']	0.0260203	0	0
181	182	Negative Regulation Of Stress Fiber Assembly (GO:0051497)	0.00178507	8.84696	55.9862	['TJP1', 'PFN1', 'WASF2', 'CGNL1']	0.0260203	0	0
182	183	Positive Regulation Of Peptidase Activity (GO:0010952)	0.00178507	8.84696	55.9862	['GRN', 'PSME1', 'PSME2', 'VSIR']	0.0260203	0	0
183	184	Positive Regulation Of Response To External Stimulus (GO:0032103)	0.00180034	3.22892	20.406	['PDGFRB', 'NFKBIA', 'PLSCR1', 'GRN', 'LGALS1', 'RARRES2', 'PDCD4', 'CYBA', 'PTN', 'TNFRSF1A']	0.0260203	0	0
184	185	Regulation Of Leukocyte Adhesion To Vascular Endothelial Cell (GO:1904994)	0.00181714	15.455	97.5285	['ITGB2', 'RELA', 'RHOA']	0.0260203	0	0
185	186	Astrocyte Activation (GO:0048143)	0.00181714	15.455	97.5285	['C1QA', 'GRN', 'IFNGR1']	0.0260203	0	0
186	187	Cell-Cell Junction Maintenance (GO:0045217)	0.00181714	15.455	97.5285	['TJP1', 'MYADM', 'FERMT2']	0.0260203	0	0
187	188	Negative Regulation Of Cell Cycle Phase Transition (GO:1901988)	0.00181714	15.455	97.5285	['PTEN', 'ZFP36L2', 'ZFP36L1']	0.0260203	0	0
188	189	Positive Regulation By Symbiont Of Entry Into Host (GO:0075294)	0.00181714	15.455	97.5285	['CD74', 'LGALS1', 'HMGB1']	0.0260203	0	0
189	190	Positive Regulation Of Integrin-Mediated Signaling Pathway (GO:2001046)	0.00181714	15.455	97.5285	['LAMB2', 'FLNA', 'LIMS2']	0.0260203	0	0
190	191	Positive Regulation Of Viral Entry Into Host Cell (GO:0046598)	0.00181714	15.455	97.5285	['CD74', 'LGALS1', 'HMGB1']	0.0260203	0	0
191	192	Negative Regulation Of Intrinsic Apoptotic Signaling Pathway (GO:2001243)	0.0018403	5.08223	32.007	['XBP1', 'HSPB1', 'PTTG1IP', 'HERPUD1', 'HSPA1A', 'NFE2L2']	0.0262147	0	0
192	193	Regulation Of NIK/NF-kappaB Signaling (GO:1901222)	0.00193038	4.29656	26.8536	['NFKBIA', 'TMSB4X', 'LAPTM5', 'PDCD4', 'ILK', 'RHOA', 'RELA']	0.0273554	0	0
193	194	Regulation Of Inflammatory Response (GO:0050727)	0.00196247	2.68941	16.7645	['GRN', 'ANXA1', 'STAT3', 'RELA', 'FOXP1', 'TNFRSF1A', 'NFKBIA', 'CDH5', 'LGALS1', 'TMSB4X', 'PDCD4', 'SNX6', 'VAMP3']	0.0276668	0	0
194	195	Phosphatidylinositol-Mediated Signaling (GO:0048015)	0.00200164	4.99122	31.0144	['PDGFRB', 'STAT3', 'PTEN', 'PIK3C2A', 'IGF1R', 'ZFP36L1']	0.0280742	0	0
195	196	Negative Regulation Of Protein Polymerization (GO:0032272)	0.00207461	8.4444	52.1693	['CDH5', 'MYADM', 'MAPRE1', 'PFN1']	0.0288024	0	0
196	197	Plasma Membrane Invagination (GO:0099024)	0.00207461	8.4444	52.1693	['GSN', 'ITGB2', 'MYH9', 'RHOA']	0.0288024	0	0
197	198	Intracellular Glucose Homeostasis (GO:0001678)	0.00209614	6.12061	37.7498	['PRKAA1', 'XBP1', 'RACK1', 'GAS6', 'IGF1R']	0.0288088	0	0
198	199	Positive Regulation Of T Cell Mediated Immunity (GO:0002711)	0.00209614	6.12061	37.7498	['HLA-C', 'HLA-DRA', 'HLA-A', 'CD55', 'HLA-E']	0.0288088	0	0
199	200	Regulation Of ERK1 And ERK2 Cascade (GO:0070372)	0.00226799	2.64229	16.0885	['PDGFRB', 'CD74', 'FN1', 'PTEN', 'PDGFA', 'FBLN1', 'HMGB1', 'RAP1A', 'TIMP3', 'CCN2', 'GAS6', 'FERMT2', 'CD44']	0.0304284	0	0
200	201	Positive Regulation Of Chemotaxis (GO:0050921)	0.00232428	5.96337	36.1639	['PDGFRB', 'TMSB4X', 'RARRES2', 'HSPB1', 'PTN']	0.0304284	0	0
201	202	Positive Regulation Of Cytokine-Mediated Signaling Pathway (GO:0001961)	0.00232428	5.96337	36.1639	['CD74', 'LAPTM5', 'GAS6', 'HSPA1B', 'HSPA1A']	0.0304284	0	0
202	203	Regulation Of Immune Effector Process (GO:0002697)	0.00232524	13.9088	84.3418	['CFH', 'HLA-DRA', 'CD55']	0.0304284	0	0
203	204	Antigen Processing And Presentation Of Endogenous Peptide Antigen Via MHC Class I Via ER Pathway (GO:0002484)	0.00232524	13.9088	84.3418	['HLA-C', 'HLA-A', 'HLA-E']	0.0304284	0	0
204	205	Antigen Processing And Presentation Of Endogenous Peptide Antigen Via MHC Class I Via ER Pathway, TAP-independent (GO:0002486)	0.00232524	13.9088	84.3418	['HLA-C', 'HLA-A', 'HLA-E']	0.0304284	0	0
205	206	Antigen Processing And Presentation Of Endogenous Peptide Antigen Via MHC Class Ib (GO:0002476)	0.00232524	13.9088	84.3418	['HLA-C', 'HLA-A', 'HLA-E']	0.0304284	0	0
206	207	Antigen Processing And Presentation Of Peptide Antigen Via MHC Class Ib (GO:0002428)	0.00232524	13.9088	84.3418	['HLA-C', 'HLA-A', 'HLA-E']	0.0304284	0	0
207	208	Clathrin Coat Assembly (GO:0048268)	0.00232524	13.9088	84.3418	['HIP1', 'PIK3C2A', 'PICALM']	0.0304284	0	0
208	209	Negative Regulation Of DNA Damage Response, Signal Transduction By P53 Class Mediator (GO:0043518)	0.00232524	13.9088	84.3418	['CD74', 'PTTG1IP', 'CD44']	0.0304284	0	0
209	210	Positive Regulation Of Interleukin-1 Production (GO:0032732)	0.00235613	4.81862	29.1562	['TYROBP', 'IFI16', 'CARD8', 'STAT3', 'HSPB1', 'HMGB1']	0.0306758	0	0
210	211	Regulation Of Mitotic Cell Cycle Phase Transition (GO:1901990)	0.00236658	4.13276	24.988	['CDK4', 'BCL7C', 'PSME1', 'MAP3K20', 'PSME2', 'ZFP36L2', 'ZFP36L1']	0.0306758	0	0
211	212	Cellular Response To Epidermal Growth Factor Stimulus (GO:0071364)	0.00239503	8.07684	48.7385	['IQGAP1', 'PTPN12', 'ZFP36L2', 'ZFP36L1']	0.0308982	0	0
212	213	Defense Response To Virus (GO:0051607)	0.0024546	2.89539	17.4007	['IFITM3', 'BST2', 'IFITM1', 'PLSCR1', 'IFITM2', 'IFI27', 'IFI16', 'CARD8', 'ISG15', 'RNASE1', 'RELA']	0.0313708	0	0
213	214	Endocytosis (GO:0006897)	0.0024546	2.89539	17.4007	['ITGB1', 'HIP1', 'ANXA1', 'INSR', 'ITGB2', 'PECAM1', 'CD14', 'PIK3C2A', 'GAS6', 'PICALM', 'DNM2']	0.0313708	0	0
214	215	Regulation Of Protein Modification Process (GO:0031399)	0.00256994	5.81399	34.6739	['CDH5', 'FN1', 'HSPB1', 'PLXNB2', 'NOP53']	0.0325407	0	0
215	216	Positive Regulation Of mRNA Catabolic Process (GO:0061014)	0.00256994	5.81399	34.6739	['ROCK1', 'PABPC1', 'CNOT8', 'ZFP36L2', 'ZFP36L1']	0.0325407	0	0
216	217	Nitrogen Compound Transport (GO:0071705)	0.00260437	3.05882	18.2017	['SLC7A5', 'ARRDC3', 'TXNIP', 'MYH9', 'SLC38A2', 'SLC7A1', 'SCAMP2', 'ABCG2', 'HSP90B1', 'CD320']	0.0328246	0	0
217	218	Protein Localization To Plasma Membrane (GO:0072659)	0.00266037	3.28694	19.4892	['SLC9A3R2', 'TSPAN14', 'RAP1A', 'ROCK1', 'RAB13', 'FLNA', 'GAS6', 'S100A10', 'TNFRSF1A']	0.0333767	0	0
218	219	Negative Regulation Of Actin Filament Bundle Assembly (GO:0032232)	0.0027479	7.7399	45.6416	['TJP1', 'PFN1', 'WASF2', 'CGNL1']	0.0334757	0	0
219	220	Negative Regulation Of Type II Interferon Production (GO:0032689)	0.0027479	7.7399	45.6416	['LAPTM5', 'HMGB1', 'GAS6', 'VSIR']	0.0334757	0	0
220	221	Cellular Response To Oxygen-Containing Compound (GO:1901701)	0.00282667	2.18702	12.8349	['PRKAA1', 'XBP1', 'CLIC4', 'TPM1', 'NEK7', 'IQGAP1', 'FOS', 'HMGB1', 'RHOA', 'RELA', 'HSP90B1', 'ZFP36L1', 'RAP1A', 'PDCD4', 'CD14', 'VIM', 'CD68', 'TGM2']	0.0334757	0	0
221	222	Regulation Of mRNA Catabolic Process (GO:0061013)	0.0028339	5.67189	33.2719	['MAPKAPK2', 'VIM', 'CNOT8', 'ZFP36L2', 'ZFP36L1']	0.0334757	0	0
222	223	Response To Glucose (GO:0009749)	0.0028339	5.67189	33.2719	['PRKAA1', 'XBP1', 'RACK1', 'GAS6', 'IGF1R']	0.0334757	0	0
223	224	Response To Hydrogen Peroxide (GO:0042542)	0.0028339	5.67189	33.2719	['ANXA1', 'CAT', 'RELA', 'RHOB', 'NFE2L2']	0.0334757	0	0
224	225	Positive Regulation Of Blood Vessel Endothelial Cell Migration (GO:0043536)	0.0028339	5.67189	33.2719	['ANXA1', 'TMSB4X', 'HSPB1', 'HMGB1', 'PIK3C2A']	0.0334757	0	0
225	226	Positive Regulation Of Cellular Component Organization (GO:0051130)	0.00285863	3.55738	20.8371	['CDH5', 'CD151', 'TFRC', 'AHNAK', 'INSR', 'RACK1', 'IGF1R', 'S100A10']	0.0334757	0	0
226	227	Regulation Of Signal Transduction (GO:0009966)	0.0028856	2.83117	16.5567	['CD63', 'RGS5', 'PLSCR1', 'IGFBP3', 'ILK', 'IGFBP7', 'CSK', 'KCTD12', 'TIMP1', 'CD46', 'CD55']	0.0334757	0	0
227	228	MHC Class II Protein Complex Assembly (GO:0002399)	0.00291306	12.6437	73.8208	['HLA-DMB', 'HLA-DRA', 'HLA-DPA1']	0.0334757	0	0
228	229	Contractile Actin Filament Bundle Assembly (GO:0030038)	0.00291306	12.6437	73.8208	['ITGB1', 'ZYX', 'RHOA']	0.0334757	0	0
229	230	Smooth Muscle Contraction (GO:0006939)	0.00291306	12.6437	73.8208	['ROCK1', 'PIK3C2A', 'MYLK']	0.0334757	0	0
230	231	Stress Fiber Assembly (GO:0043149)	0.00291306	12.6437	73.8208	['ITGB1', 'ZYX', 'RHOA']	0.0334757	0	0
231	232	Striated Muscle Cell Development (GO:0055002)	0.00291306	12.6437	73.8208	['FLII', 'TMOD3', 'MYL9']	0.0334757	0	0
232	233	Membrane Raft Organization (GO:0031579)	0.00291306	12.6437	73.8208	['COLEC12', 'MYADM', 'S100A10']	0.0334757	0	0
233	234	Negative Regulation Of Smooth Muscle Cell Migration (GO:0014912)	0.00291306	12.6437	73.8208	['IGFBP3', 'TPM1', 'PRKG1']	0.0334757	0	0
234	235	Peptide Antigen Assembly With MHC Class II Protein Complex (GO:0002503)	0.00291306	12.6437	73.8208	['HLA-DMB', 'HLA-DRA', 'HLA-DPA1']	0.0334757	0	0
235	236	Positive Regulation Of Nuclear-Transcribed mRNA Catabolic Process, Deadenylation-Dependent Decay (GO:1900153)	0.00291306	12.6437	73.8208	['PABPC1', 'ZFP36L2', 'ZFP36L1']	0.0334757	0	0
236	237	Positive Regulation Of Protein-Containing Complex Disassembly (GO:0043243)	0.00291306	12.6437	73.8208	['CALCOCO2', 'INSR', 'IGF1R']	0.0334757	0	0
237	238	Positive Regulation Of Transcription From RNA Polymerase II Promoter Involved In Cellular Response To Chemical Stimulus (GO:1901522)	0.00291306	12.6437	73.8208	['XBP1', 'RELA', 'NFE2L2']	0.0334757	0	0
238	239	Regulation Of Interleukin-6 Production (GO:0032675)	0.00301878	3.52364	20.4473	['CD74', 'XBP1', 'TYROBP', 'MAPKAPK2', 'STAT3', 'CYBA', 'HMGB1', 'GAS6']	0.0345455	0	0
239	240	Positive Regulation Of Protein Phosphorylation (GO:0001934)	0.00308223	2.22396	12.8592	['CD74', 'BMPR2', 'TFRC', 'FAXDC2', 'INSR', 'RARRES2', 'PDGFA', 'ILK', 'IQGAP1', 'MOB3B', 'MOB1A', 'RAP1A', 'RACK1', 'PECAM1', 'GAS6', 'CD44', 'ENG']	0.0351246	0	0
240	241	Membrane Organization (GO:0061024)	0.00310234	2.98028	17.2129	['SYNGR2', 'DMPK', 'REEP3', 'SNAP23', 'MYADM', 'PIK3C2A', 'S100A10', 'PICALM', 'DNM2', 'VAMP3']	0.035207	0	0
241	242	Insulin Receptor Signaling Pathway (GO:0008286)	0.00311691	5.53656	31.951	['INSR', 'RARRES2', 'NAMPT', 'PIK3C2A', 'IGF1R']	0.0352263	0	0
242	243	Peptidyl-Tyrosine Dephosphorylation (GO:0035335)	0.00313479	7.42993	42.835	['PTPRB', 'DUSP1', 'PTPN12', 'TNS2']	0.0352825	0	0
243	244	Skin Development (GO:0043588)	0.0032044	4.50681	25.8837	['CLIC4', 'ANXA1', 'TXNIP', 'PDGFA', 'ITGA6', 'CFLAR']	0.0359181	0	0
244	245	Positive Regulation Of Phosphatidylinositol 3-Kinase Signaling (GO:0014068)	0.00344803	4.43505	25.1465	['PDGFRB', 'INSR', 'FN1', 'PDGFA', 'DCN', 'IGF1R']	0.0381449	0	0
245	246	Cellular Response To Molecule Of Bacterial Origin (GO:0071219)	0.00354145	3.42613	19.3344	['XBP1', 'PDCD4', 'CD14', 'HMGB1', 'VIM', 'CD68', 'RHOA', 'RELA']	0.0381449	0	0
246	247	Positive Regulation Of Interleukin-10 Production (GO:0032733)	0.00355722	7.1438	40.2823	['STAT3', 'ISG15', 'HMGB1', 'CD46']	0.0381449	0	0
247	248	Regulation Of Arp2/3 Complex-Mediated Actin Nucleation (GO:0034315)	0.00355722	7.1438	40.2823	['WASHC4', 'CYFIP1', 'FCHSD2', 'WASF2']	0.0381449	0	0
248	249	Regulation Of Monocyte Differentiation (GO:0045655)	0.00358436	11.5895	65.2622	['CD74', 'FOXP1', 'ZFP36L1']	0.0381449	0	0
249	250	Cellular Response To Corticosteroid Stimulus (GO:0071384)	0.00358436	11.5895	65.2622	['ANXA1', 'ZFP36L2', 'ZFP36L1']	0.0381449	0	0
250	251	Negative Regulation Of Endoplasmic Reticulum Stress-Induced Intrinsic Apoptotic Signaling Pathway (GO:1902236)	0.00358436	11.5895	65.2622	['XBP1', 'HERPUD1', 'HSPA1A']	0.0381449	0	0
251	252	Negative Regulation Of Phagocytosis (GO:0050765)	0.00358436	11.5895	65.2622	['PLSCR1', 'RACK1', 'HMGB1']	0.0381449	0	0
252	253	Negative Regulation Of Platelet Activation (GO:0010544)	0.00358436	11.5895	65.2622	['PDGFA', 'CD9', 'PRKG1']	0.0381449	0	0
253	254	Nitric Oxide Biosynthetic Process (GO:0006809)	0.00358436	11.5895	65.2622	['NQO1', 'CYB5R3', 'DDAH2']	0.0381449	0	0
254	255	Platelet-Derived Growth Factor Receptor Signaling Pathway (GO:0048008)	0.00358436	11.5895	65.2622	['PDGFRB', 'PDGFA', 'PIK3C2A']	0.0381449	0	0
255	256	Protein Localization To Cell-Cell Junction (GO:0150105)	0.00358436	11.5895	65.2622	['TJP1', 'CDH5', 'CGNL1']	0.0381449	0	0
256	257	Regulation Of Bicellular Tight Junction Assembly (GO:2000810)	0.00358436	11.5895	65.2622	['TJP1', 'CLDN5', 'ROCK1']	0.0381449	0	0
257	258	Cellular Component Assembly (GO:0022607)	0.00390598	2.46909	13.6917	['CD74', 'GSN', 'WIPF1', 'SLC2A1', 'PDGFA', 'RHOA', 'AIF1L', 'SLC9A3R2', 'CALD1', 'PLS3', 'GAS6', 'VAMP3', 'PICALM']	0.0413832	0	0
258	259	Positive Regulation Of Angiogenesis (GO:0045766)	0.00392705	3.36405	18.6364	['ITGB1', 'TJP1', 'CDH5', 'XBP1', 'GRN', 'HSPB1', 'ANGPTL4', 'RHOB']	0.0413832	0	0
259	260	Cardiac Muscle Tissue Morphogenesis (GO:0055008)	0.00401669	6.87886	37.9527	['FKBP1A', 'TPM1', 'S1PR1', 'ENG']	0.0413832	0	0
260	261	Phospholipid Translocation (GO:0045332)	0.00401669	6.87886	37.9527	['PLSCR1', 'PLSCR4', 'ATP11A', 'MFSD2A']	0.0413832	0	0
261	262	Regulation Of Cell Morphogenesis (GO:0022604)	0.00401669	6.87886	37.9527	['SPARC', 'CD44', 'FERMT2', 'MFSD2A']	0.0413832	0	0
262	263	Negative Regulation Of Intracellular Signal Transduction (GO:1902532)	0.00403787	2.56805	14.1552	['PRKAA1', 'DUSP1', 'TMSB4X', 'CARD8', 'RACK1', 'MYADM', 'PTEN', 'NOP53', 'CGNL1', 'RELA', 'HERPUD1', 'IGF1R']	0.0413832	0	0
263	264	Negative Regulation Of Multicellular Organismal Process (GO:0051241)	0.00403787	2.56805	14.1552	['SRGN', 'GRN', 'BMPR2', 'IFNGR1', 'ARRDC3', 'ID1', 'ARHGDIB', 'PTEN', 'TIMP1', 'GAS6', 'ATF4', 'PTPRG']	0.0413832	0	0
264	265	Intracellular Iron Ion Homeostasis (GO:0006879)	0.00408788	5.16667	28.4153	['TFRC', 'CYBRD1', 'B2M', 'FTL', 'PICALM']	0.0413832	0	0
265	266	Positive Regulation Of Epithelial Cell Migration (GO:0010634)	0.00413888	3.70838	20.3491	['SCARB1', 'GRN', 'BMPR2', 'SPARC', 'PFN1', 'FOXP1', 'RHOB']	0.0413832	0	0
266	267	Negative Regulation Of Cell Adhesion (GO:0007162)	0.0042618	4.23281	23.1029	['CD164', 'DUSP1', 'PODXL', 'PLXNB2', 'FBLN1', 'RHOA']	0.0413832	0	0
267	268	ISG15-protein Conjugation (GO:0032020)	0.00431757	30.8463	167.96	['ISG15', 'UBE2L6']	0.0413832	0	0
268	269	L-ascorbic Acid Metabolic Process (GO:0019852)	0.00431757	30.8463	167.96	['SLC2A1', 'SLC2A3']	0.0413832	0	0
269	270	Regulation Of Hepatocyte Proliferation (GO:2000345)	0.00431757	30.8463	167.96	['XBP1', 'PTN']	0.0413832	0	0
270	271	Regulation Of Plasma Membrane Repair (GO:1905684)	0.00431757	30.8463	167.96	['MYH9', 'S100A10']	0.0413832	0	0
271	272	Cell Junction Disassembly (GO:0150146)	0.00431757	30.8463	167.96	['C1QB', 'C1QC']	0.0413832	0	0
272	273	Cellular Heat Acclimation (GO:0070370)	0.00431757	30.8463	167.96	['HSPA1B', 'HSPA1A']	0.0413832	0	0
273	274	Chondrocyte Development (GO:0002063)	0.00431757	30.8463	167.96	['BMPR2', 'SULF2']	0.0413832	0	0
274	275	Response To Angiotensin (GO:1990776)	0.00431757	30.8463	167.96	['ROCK1', 'RELA']	0.0413832	0	0
275	276	Heat Acclimation (GO:0010286)	0.00431757	30.8463	167.96	['HSPA1B', 'HSPA1A']	0.0413832	0	0
276	277	Zymogen Inhibition (GO:0097341)	0.00431757	30.8463	167.96	['CAST', 'CARD8']	0.0413832	0	0
277	278	Negative Regulation Of Cell Size (GO:0045792)	0.00431757	30.8463	167.96	['PTEN', 'RHOA']	0.0413832	0	0
278	279	Negative Regulation Of Trophoblast Cell Migration (GO:1901164)	0.00431757	30.8463	167.96	['ARHGDIB', 'TIMP1']	0.0413832	0	0
279	280	Positive Regulation Of Endothelial Cell Development (GO:1901552)	0.00431757	30.8463	167.96	['CDH5', 'CLDN5']	0.0413832	0	0
280	281	Positive Regulation Of Establishment Of Endothelial Barrier (GO:1903142)	0.00431757	30.8463	167.96	['CDH5', 'CLDN5']	0.0413832	0	0
281	282	Positive Regulation Of Extrinsic Apoptotic Signaling Pathway Via Death Domain Receptors (GO:1902043)	0.00431757	30.8463	167.96	['PTEN', 'TIMP3']	0.0413832	0	0
282	283	Regulation Of Interleukin-1 Production (GO:0032652)	0.00434259	10.6974	58.1863	['HMGB1', 'GAS6', 'FOXP1']	0.0413832	0	0
283	284	Ruffle Organization (GO:0031529)	0.00434259	10.6974	58.1863	['CYFIP1', 'TPM1', 'AIF1L']	0.0413832	0	0
284	285	Vasculature Development (GO:0001944)	0.00434259	10.6974	58.1863	['PDGFRB', 'CDH5', 'BMPR2']	0.0413832	0	0
285	286	Negative Regulation Of Intrinsic Apoptotic Signaling Pathway By P53 Class Mediator (GO:1902254)	0.00434259	10.6974	58.1863	['CD74', 'PTTG1IP', 'CD44']	0.0413832	0	0
286	287	Nitric Oxide Metabolic Process (GO:0046209)	0.00434259	10.6974	58.1863	['NQO1', 'CYB5R3', 'DDAH2']	0.0413832	0	0
287	288	Positive Regulation Of Supramolecular Fiber Organization (GO:1902905)	0.0043849	3.66652	19.9077	['FCHSD2', 'GSN', 'CDC42EP4', 'SYNPO2', 'CDC42EP1', 'MAPRE1', 'PFN1']	0.0416413	0	0
288	289	Positive Regulation Of Leukocyte Mediated Cytotoxicity (GO:0001912)	0.0044547	5.05409	27.3618	['TYROBP', 'HLA-C', 'HLA-DRA', 'HLA-A', 'HLA-E']	0.0421578	0	0
289	290	Cellular Response To Reactive Oxygen Species (GO:0034614)	0.00456217	4.16942	22.473	['ANXA1', 'TPM1', 'FOS', 'RELA', 'RHOB', 'NFE2L2']	0.043026	0	0
290	291	Inflammatory Response (GO:0006954)	0.00478296	2.51007	13.4106	['SERPINA3', 'ANXA1', 'STAT3', 'MAPKAPK2', 'ITGB2', 'CYBA', 'CD14', 'FOS', 'HMGB1', 'CD44', 'RELA', 'TNFRSF1A']	0.0449533	0	0
291	292	Rho Protein Signal Transduction (GO:0007266)	0.00484437	4.9463	26.3635	['ROCK1', 'ARHGDIB', 'ARHGEF1', 'RHOA', 'RHOB']	0.0450658	0	0
292	293	Negative Regulation Of Innate Immune Response (GO:0045824)	0.00484437	4.9463	26.3635	['GRN', 'IFI16', 'SERPING1', 'ISG15', 'VSIG4']	0.0450658	0	0
293	294	Regulation Of Cell Development (GO:0060284)	0.00484437	4.9463	26.3635	['GRN', 'KAT6A', 'BHLHE40', 'PTN', 'S100A10']	0.0450658	0	0
294	295	Regulation Of mRNA Stability (GO:0043488)	0.00487784	4.10789	21.8665	['ROCK1', 'MAPKAPK2', 'PABPC1', 'VIM', 'ZFP36L2', 'ZFP36L1']	0.0452234	0	0
295	296	Phosphorylation (GO:0016310)	0.00500582	2.06216	10.9236	['PRKAA1', 'BMPR2', 'DMPK', 'ROCK1', 'IGFBP3', 'INSR', 'STAT3', 'NEK7', 'ILK', 'HIPK3', 'CDK4', 'MAPKAPK2', 'MKNK2', 'MAP3K20', 'STK38L', 'CSK', 'GAS6', 'PRKG1']	0.0457949	0	0
296	297	Cellular Response To Lipopolysaccharide (GO:0071222)	0.00503311	3.21823	17.0299	['XBP1', 'PDCD4', 'CD14', 'HMGB1', 'VIM', 'CD68', 'RHOA', 'RELA']	0.0457949	0	0
297	298	Protein Dephosphorylation (GO:0006470)	0.00503311	3.21823	17.0299	['PTPRB', 'DUSP1', 'CTDSP2', 'PTEN', 'PPP2R5A', 'PTPN12', 'TNS2', 'PTPRG']	0.0457949	0	0
298	299	Actin Filament Bundle Assembly (GO:0051017)	0.00505257	6.4038	33.8624	['CALD1', 'PLS3', 'HSP90B1', 'AIF1L']	0.0457949	0	0
299	300	Positive Regulation Of T Cell Mediated Cytotoxicity (GO:0001916)	0.00505257	6.4038	33.8624	['HLA-C', 'HLA-DRA', 'HLA-A', 'HLA-E']	0.0457949	0	0
300	301	Regulation Of Amyloid-Beta Formation (GO:1902003)	0.00505257	6.4038	33.8624	['ROCK1', 'IFNGR1', 'RELA', 'PICALM']	0.0457949	0	0
301	302	T Cell Migration (GO:0072678)	0.00519083	9.9328	52.2551	['S1PR1', 'MSN', 'CD99']	0.0457949	0	0
302	303	Aorta Morphogenesis (GO:0035909)	0.00519083	9.9328	52.2551	['PDGFRB', 'MYLK', 'ENG']	0.0457949	0	0
303	304	Carbohydrate Derivative Transport (GO:1901264)	0.00519083	9.9328	52.2551	['SCARB1', 'NPC2', 'MFSD2A']	0.0457949	0	0
304	305	Leukocyte Tethering Or Rolling (GO:0050901)	0.00519083	9.9328	52.2551	['ITGB1', 'ROCK1', 'JAM2']	0.0457949	0	0
305	306	Positive Regulation Of Alpha-Beta T Cell Proliferation (GO:0046641)	0.00519083	9.9328	52.2551	['HLA-A', 'CD55', 'HLA-E']	0.0457949	0	0
306	307	Positive Regulation Of Amyloid-Beta Formation (GO:1902004)	0.00519083	9.9328	52.2551	['IFNGR1', 'RELA', 'PICALM']	0.0457949	0	0
307	308	Positive Regulation Of Leukocyte Adhesion To Vascular Endothelial Cell (GO:1904996)	0.00519083	9.9328	52.2551	['ITGB2', 'RELA', 'RHOA']	0.0457949	0	0
308	309	Positive Regulation Of Regulatory T Cell Differentiation (GO:0045591)	0.00519083	9.9328	52.2551	['HLA-DRA', 'CD46', 'VSIR']	0.0457949	0	0
309	310	Regulation Of Fat Cell Differentiation (GO:0045598)	0.00520927	4.04815	21.2824	['XBP1', 'RARRES2', 'ADIRF', 'ZFP36L2', 'FERMT2', 'ZFP36L1']	0.0457949	0	0
310	311	Negative Regulation Of Phosphorylation (GO:0042326)	0.00520927	4.04815	21.2824	['ROCK1', 'IGFBP3', 'DNAJC10', 'PTEN', 'MYADM', 'FBLN1']	0.0457949	0	0
311	312	Actin Cytoskeleton Reorganization (GO:0031532)	0.00525762	4.84301	25.4165	['ANXA1', 'S1PR1', 'MYH9', 'FLNA', 'RHOA']	0.0457949	0	0
312	313	Negative Regulation Of Cysteine-Type Endopeptidase Activity (GO:2000117)	0.00525762	4.84301	25.4165	['CAST', 'IFI16', 'CARD8', 'GAS6', 'CD44']	0.0457949	0	0
313	314	Positive Regulation Of NIK/NF-kappaB Signaling (GO:1901224)	0.00525762	4.84301	25.4165	['LAPTM5', 'PDCD4', 'ILK', 'RHOA', 'RELA']	0.0457949	0	0
314	315	Positive Regulation Of Interleukin-6 Production (GO:0032755)	0.00555691	3.99011	20.7195	['CD74', 'XBP1', 'TYROBP', 'STAT3', 'CYBA', 'HMGB1']	0.0482481	0	0
315	316	Positive Regulation Of Immunoglobulin Production (GO:0002639)	0.00563179	6.19002	32.0602	['XBP1', 'TFRC', 'HLA-E', 'VAMP3']	0.0485897	0	0
316	317	Positive Regulation Of Organelle Organization (GO:0010638)	0.00563179	6.19002	32.0602	['ANXA1', 'ATL3', 'CALCOCO2', 'SORBS3']	0.0485897	0	0
317	318	Regulation Of Lipid Metabolic Process (GO:0019216)	0.00569519	4.74393	24.5172	['SERPINA3', 'NPC2', 'RARRES2', 'PLPP1', 'CERS2']	0.0488287	0	0
318	319	Regulation Of Smooth Muscle Cell Proliferation (GO:0048660)	0.00569519	4.74393	24.5172	['PDGFRB', 'BMPR2', 'IGFBP3', 'APOD', 'FOXP1']	0.0488287	0	0
319	320	Negative Regulation Of Gene Expression (GO:0010629)	0.00576727	2.19444	11.3136	['SRGN', 'PRKAA1', 'STAT3', 'ZFP36L2', 'FOXP1', 'CLDN5', 'SLC7A5', 'RACK1', 'MYADM', 'PABPC1', 'CD46', 'HSPA1B', 'ENG', 'HSPA1A', 'PICALM']	0.0492921	0	0
