# Supplementary material for: Novel Pathological Mechanisms Revealed by Spatial Transcriptomic Analysis of Hippocampus in Aged Control, Primary Age-Related Tauopathy, and Alzheimer’s Disease
Source: Research Square preprint supplement (doi:10.21203/rs.3.rs-7303622/v1), 2025-08-22
Supplement: Supplementary file 2 [file 3ae497dd18eb7b23d644c433.xlsx]

## Sheet: Sheet1
	index	Group_key	Gene_name	Log2FC	P_adjusted
0	0	CA1	CTXN1	1.2639	0
1	1	CA1	VXN	1.39678	0
2	2	CA1	FIBCD1	2.57705	0
3	3	CA1	CALM3	0.811465	0
4	4	CA1	CKB	0.732985	0
5	5	CA1	HPCA	1.16533	0
6	6	CA1	WIPF3	1.49895	0
7	7	CA1	PRKCG	1.52431	0
8	8	CA1	LMO4	1.3429	0
9	9	CA1	HTR1A	1.8143	0
10	10	CA1	PPP3R1	1.06547	0
11	11	CA1	FXYD6	1.12834	0
12	12	CA1	COL5A2	2.23297	0
13	13	CA1	CABP1	1.39319	0
14	14	CA1	LY6H	0.937056	0
15	15	CA1	SLC17A7	0.876101	0
16	16	CA1	CHN1	0.997851	0
17	17	CA1	PRNP	0.681387	0
18	18	CA1	HS6ST3	1.48074	0
19	19	CA1	NEFM	1.09282	0
20	20	CA1	PPP3CA	1.06572	0
21	21	CA1	NRGN	0.895316	0
22	22	CA1	DOK6	1.47599	0
23	23	CA1	NEFL	0.990519	0
24	24	CA1	AK5	0.989508	0
25	25	CA1	ENC1	0.804609	0
26	26	CA1	CABP7	1.54408	0
27	27	CA1	POU3F1	2.18294	0
28	28	CA1	CAMKV	1.10078	0
29	29	CA1	GABRA3	1.63889	0
30	30	CA1	MAPK10	0.738772	0
31	31	CA1	FAM131A	1.28304	0
32	32	CA1	NNAT	1.14688	0
33	33	CA1	PEG10	1.05835	0
34	34	CA1	PCDHGC5	1.36852	0
35	35	CA1	ARNT2	0.914927	0
36	36	CA1	CADM3	0.862699	0
37	37	CA1	BHLHE22	1.35109	0
38	38	CA1	TMEM130	1.04512	0
39	39	CA1	CCDC85B	0.789146	0
40	40	CA1	RTP5	1.08675	0
41	41	CA1	GDA	1.47759	0
42	42	CA1	DDAH1	1.03228	0
43	43	CA1	SYT5	1.09769	0
44	44	CA1	YJEFN3	0.978195	0
45	45	CA1	DMTN	0.832799	0
46	46	CA1	PCDH7	1.43529	0
47	47	CA1	TSPYL1	0.764186	0
48	48	CA1	CYP46A1	1.34334	0
49	49	CA1	RTN1	0.915381	0
50	50	CA1	CRYM	1.26309	0
51	51	CA1	SNN	0.876278	0
52	52	CA1	DIRAS2	0.966996	0
53	53	CA1	MPPED1	1.93279	0
54	54	CA1	SERPINI1	1.09004	0
55	55	CA1	MAN1A1	1.74626	0
56	56	CA1	RGS14	1.32698	0
57	57	CA1	PRKAR2B	1.38851	0
58	58	CA1	PRKCB	1.40545	0
59	59	CA1	TAFA1	1.48737	0
60	60	CA1	MOB1B	1.06915	0
61	61	CA1	STMN2	0.774642	0
62	62	CA1	CCN3	1.77015	0
63	63	CA1	UBE2QL1	0.973443	0
64	64	CA1	FNDC1	2.43156	0
65	65	CA1	STX1A	1.18464	0
66	66	CA1	TUB	0.885	0
67	67	CA1	PHACTR1	0.836101	0
68	68	CA1	RAB3A	1.04065	0
69	69	CA1	GRIA1	0.881968	0
70	70	CA1	VAMP2	0.588837	0
71	71	CA1	PSD3	0.914265	0
72	72	CA1	CPLX2	0.571317	0
73	73	CA1	DDN	1.03526	0
74	74	CA1	PRKAR1B	0.747864	0
75	75	CA1	GNG3	0.835449	0
76	76	CA1	RHBDD2	0.796398	0
77	77	CA1	UCHL1	0.606526	0
78	78	CA1	GABRA1	1.1517	0
79	79	CA1	PLD3	0.768426	0
80	80	CA1	CNIH2	0.79695	0
81	81	CA1	SNAP25	0.60978	0
82	82	CA1	MAP2	0.673812	0
83	83	CA1	NPTN	0.685578	0
84	84	CA1	PFN2	0.568995	0
85	85	CA1	DOCK4	0.890044	0
86	86	CA1	ATP2A2	0.633601	0
87	87	CA1	PLK2	1.22574	0
88	88	CA1	RASL10A	1.62329	0
89	89	CA1	DKK3	0.590772	0
90	90	CA1	MICAL2	0.853526	0
91	91	CA1	SULT4A1	1.05355	0
92	92	CA1	IDH3G	0.932611	0
93	93	CA1	PPP1R9B	0.618686	0
94	94	CA1	SYP	0.901399	0
95	95	CA1	ATP6V1H	0.744644	0
96	96	CA1	MMD	0.896547	0
97	97	CA1	ARPC2	0.647281	0
98	98	CA1	CAMK1G	1.71407	0
99	99	CA1	HSPH1	0.827169	0
100	100	CA1	NDFIP2	1.0982	0
101	101	CA1	LDOC1	0.784451	0
102	102	CA1	SYNGAP1	0.940715	0
103	103	CA1	TMEM59L	0.638475	0
104	104	CA1	GPM6A	0.611357	0
105	105	CA1	PDE2A	0.969343	0
107	107	CA1	OTUB1	0.730777	0
109	109	CA1	FAIM2	0.645203	0
110	110	CA1	PGM2L1	1.0033	0
111	111	CA1	NELL2	0.844294	0
112	112	CA1	GRIA3	0.957423	0
113	113	CA1	PHYHIP	0.779035	0
114	114	CA1	TOMM34	0.960102	0
115	115	CA1	WASF1	0.831865	0
116	116	CA1	CHL1	0.784839	0
117	117	CA1	SV2B	0.984331	0
118	118	CA1	NEGR1	1.02902	0
119	119	CA1	THY1	0.636852	0
120	120	CA1	NCDN	0.558079	0
121	121	CA1	SCN3B	0.862431	0
122	122	CA1	DUSP4	1.30401	0
123	123	CA1	NSF	0.790991	0
124	124	CA1	ST6GALNAC5	1.10596	0
125	125	CA1	VSNL1	0.671912	0
126	126	CA1	SYNGR1	0.721175	0
127	127	CA1	PARM1	1.21815	0
128	128	CA1	SLIT2	1.39163	0
129	129	CA1	CTXND1	1.57792	0
130	130	CA1	KCNAB1	1.22871	0
131	131	CA1	GRIN1	0.959653	0
132	132	CA1	GRIA2	0.784677	0
133	133	CA1	GRIN2B	1.04754	0
134	134	CA1	RIPOR2	1.3525	0
135	135	CA1	TAGLN3	0.98135	0
136	136	CA1	ITPKA	1.43201	0
137	137	CA1	PI4KA	0.741243	0
138	138	CA1	HRK	1.34532	0
139	139	CA1	MET	2.01744	0
140	140	CA1	PTMS	0.543509	0
141	141	CA1	C1QTNF4	1.0031	0
142	142	CA1	MRTFB	0.828162	0
143	143	CA1	PTPRU	1.6001	0
144	144	CA1	NDRG4	0.634939	0
145	145	CA1	CACNG3	1.41632	0
146	146	CA1	MAP1A	0.663341	0
147	147	CA1	EEF1A2	0.575194	0
148	148	CA1	BAIAP2	0.926112	0
149	149	CA1	RPRML	1.69933	0
150	150	CA1	C11orf87	0.992418	0
151	151	CA1	MINK1	0.649228	0
152	152	CA1	MAST3	0.795205	0
153	153	CA1	MIF	0.547786	0
154	154	CA1	ARHGEF25	0.838669	0
155	155	CA1	SLC8A2	0.799132	0
156	156	CA1	HCN1	1.0305	0
157	157	CA1	SLC4A10	0.867936	0
158	158	CA1	AKAP5	1.58154	0
159	159	CA1	CNKSR2	0.827077	0
160	160	CA1	DNM1	0.73403	0
161	161	CA1	NUP93	1.07896	0
162	162	CA1	ATP2B1	0.717445	0
163	163	CA1	CDK5R1	0.721809	0
164	164	CA1	FAM171B	0.633795	0
165	165	CA1	SEZ6L	0.942067	0
166	166	CA1	TSPAN7	0.506616	0
167	167	CA1	MAPK8IP2	0.73107	0
168	168	CA1	STMN3	0.631802	0
169	169	CA1	CLSTN1	0.557573	0
170	170	CA1	SYNGR3	0.934768	0
171	171	CA1	KIF3C	0.788837	0
172	172	CA1	PLPPR2	0.775758	0
173	173	CA1	CACNB2	1.02391	0
174	174	CA1	FBXO44	0.65308	0
175	175	CA1	LYPD1	1.42709	0
176	176	CA1	NOS1AP	1.17304	0
177	177	CA1	IL12RB2	1.73853	0
178	178	CA1	FXYD7	0.819352	0
179	179	CA1	LZTS3	0.75297	0
180	180	CA1	AP1S1	0.879649	0
181	181	CA1	CADPS2	1.57198	0
182	182	CA1	PRRT1	1.11145	0
183	183	CA1	NME1	0.75358	0
184	184	CA1	CDKN1C	1.05615	0
185	185	CA1	TRIM36	1.32862	0
186	186	CA1	RNF150	1.1065	0
187	187	CA1	MBOAT7	0.807497	0
188	188	CA1	CPNE6	0.722033	0
189	189	CA1	TSPYL2	0.658092	0
190	190	CA1	NELL1	1.25608	0
191	191	CA1	MDH1	0.660298	0
192	192	CA1	PIP4K2C	1.05766	0
193	193	CA1	PRXL2B	0.875891	0
194	194	CA1	FARP1	0.971582	0
195	195	CA1	ARPC1A	0.775547	0
196	196	CA1	ICAM5	0.735662	0
197	197	CA1	PTPRN2	1.06597	0
199	199	CA1	SYT1	0.837502	0
200	200	CA1	ATP2B2	0.773168	0
201	201	CA1	PITPNM3	1.17113	0
202	202	CA1	GOT2	0.866514	9.07343e-308
203	203	CA1	PNO1	0.976928	1.3628e-307
204	204	CA1	CAPZA2	0.541923	1.8527e-307
205	205	CA1	RNF187	0.518558	6.34597e-306
206	206	CA1	SLC8A1	0.702027	9.79367e-306
208	208	CA1	DDX41	0.834459	2.18493e-304
209	209	CA1	SCN8A	0.818463	3.27629e-302
210	210	CA1	ATRNL1	0.604576	5.7934e-302
211	211	CA1	RGS7	0.872572	1.83392e-301
212	212	CA1	KPNA2	1.08204	1.35368e-300
213	213	CA1	MYT1L	0.793038	4.96818e-300
214	214	CA1	CDK5R2	0.8087	3.46099e-298
215	215	CA1	C14orf132	0.747979	1.99638e-297
217	217	CA1	KCNH3	1.08079	7.30844e-293
218	218	CA1	KIAA0319	1.18837	8.66312e-293
219	219	CA1	NCKAP1	0.510067	2.68119e-292
220	220	CA1	RAP1GAP	0.825894	2.7937e-291
221	221	CA1	CCBE1	1.9095	3.98319e-291
222	222	CA1	KCNN2	1.178	4.76296e-290
223	223	CA1	MMP17	0.973337	1.59986e-288
224	224	CA1	LINGO1	0.907584	2.73539e-287
225	225	CA1	CAP2	0.894139	4.33902e-287
226	226	CA1	FAM43A	1.35445	1.72339e-286
227	227	CA1	SYNPO	0.793947	3.83918e-286
228	228	CA1	USP25	0.955343	6.76097e-285
229	229	CA1	TBC1D1	0.926398	7.18512e-285
230	230	CA1	CHPF	0.908922	2.01035e-284
231	231	CA1	WASL	0.879176	2.23736e-284
232	232	CA1	PKP2	1.20125	2.75674e-284
233	233	CA1	SLC12A5	0.814558	6.59122e-283
234	234	CA1	NETO2	1.1309	6.11553e-282
235	235	CA1	HS6ST2	1.47854	9.49136e-281
236	236	CA1	SPTBN4	0.708402	4.68285e-280
237	237	CA1	NEUROD6	1.12004	2.40575e-279
238	238	CA1	DUSP6	1.16916	4.90597e-279
239	239	CA1	MAP2K1	0.65046	7.78615e-278
240	240	CA1	CA11	0.657277	2.71046e-273
241	241	CA1	GALNT9	1.24476	5.91259e-273
242	242	CA1	RASAL1	1.0367	6.96654e-273
244	244	CA1	C2orf80	0.993347	2.43512e-272
245	245	CA1	KIAA1217	1.40101	6.28563e-272
246	246	CA1	CACNA2D1	0.919838	2.88272e-270
247	247	CA1	PSD	0.662609	3.75907e-267
248	248	CA1	PLPPR4	1.28988	4.61442e-265
249	249	CA1	TEF	0.755821	4.23788e-264
250	250	CA1	KCNQ2	0.676052	3.73886e-263
252	252	CA1	ZDHHC23	1.33022	2.70466e-262
253	253	CA1	SCG5	0.628537	1.96475e-261
254	254	CA1	KSR2	1.0122	3.97409e-261
255	255	CA1	CHRM1	0.984594	4.38326e-261
256	256	CA1	PCDH19	1.06746	9.59454e-261
257	257	CA1	VGF	0.929502	2.13904e-260
258	258	CA1	TSPYL4	0.628236	1.77768e-258
259	259	CA1	SCAMP5	0.562715	3.38151e-257
260	260	CA1	ITPR1	1.21153	1.91284e-256
263	263	CA1	ATP1A3	0.682717	1.38949e-254
264	264	CA1	CACNB1	0.843939	1.60979e-253
265	265	CA1	PRICKLE2	0.865171	1.14204e-252
266	266	CA1	SH3RF1	1.12978	5.28173e-251
268	268	CA1	PEX5L	0.864452	7.43179e-249
269	269	CA1	PLCH2	1.31823	1.58306e-247
270	270	CA1	SORBS2	0.909033	5.98068e-247
271	271	CA1	CX3CL1	0.742748	9.69214e-247
272	272	CA1	INKA2	1.01809	4.02828e-246
273	273	CA1	DYNC1I1	0.596053	4.64934e-245
274	274	CA1	COL24A1	1.15373	5.74691e-245
275	275	CA1	GIT1	0.675644	1.38774e-244
277	277	CA1	FAM234B	1.01623	1.53508e-244
278	278	CA1	NMNAT2	0.855078	4.37101e-243
279	279	CA1	MZT1	0.753501	1.66182e-242
280	280	CA1	DDX24	0.566676	8.48393e-242
282	282	CA1	PPP2R2C	0.654388	2.56625e-239
283	283	CA1	GABRB2	0.855919	8.30863e-238
284	284	CA1	DBN1	0.731553	3.06441e-237
285	285	CA1	THRB	1.09669	3.18555e-237
286	286	CA1	DLGAP3	1.01543	1.47954e-236
287	287	CA1	ATP6AP2	0.651727	6.54618e-236
288	288	CA1	KCTD13	0.864349	8.60657e-236
289	289	CA1	OPCML	0.707903	2.18765e-235
290	290	CA1	SYTL5	1.12201	2.74777e-235
291	291	CA1	FAM189A1	0.998335	4.4305e-234
292	292	CA1	PHF24	0.805601	1.56515e-233
293	293	CA1	RAMP1	0.678327	8.72891e-233
294	294	CA1	SERTM1	1.48928	5.28303e-232
295	295	CA1	ACTR3B	0.991653	6.30003e-232
296	296	CA1	ARPC5L	0.669694	9.98893e-232
297	297	CA1	NT5DC3	0.828967	3.13085e-231
298	298	CA1	MAL2	0.842415	3.37568e-230
299	299	CA1	CNTNAP5	0.893091	1.12778e-229
300	300	CA1	BHLHE40	0.876747	1.03244e-228
301	301	CA1	RAB15	0.852378	2.49098e-228
302	302	CA1	LY6E	0.603996	2.17651e-227
304	304	CA1	CORO2B	0.713104	7.04085e-226
305	305	CA1	LARGE1	0.756916	8.4044e-225
306	306	CA1	SLITRK4	0.985809	2.61896e-224
307	307	CA1	C1orf216	0.773604	3.31061e-223
308	308	CA1	FEZF2	1.11118	3.93186e-223
310	310	CA1	CLMP	1.58906	3.03893e-221
311	311	CA1	PCMT1	0.515657	4.42177e-221
312	312	CA1	DIRAS1	0.836503	5.39905e-221
313	313	CA1	DOC2B	0.858067	1.33908e-220
314	314	CA1	CACNA1E	0.709683	3.03138e-220
315	315	CA1	KCNF1	1.02576	7.86054e-219
316	316	CA1	GNAO1	0.55896	1.25313e-218
317	317	CA1	SLC25A4	0.51876	2.96725e-217
318	318	CA1	FAM49A	0.728694	3.80812e-217
319	319	CA1	SHC3	0.632522	1.44301e-216
320	320	CA1	ADD2	0.735482	3.43057e-216
321	321	CA1	PACS1	0.843191	6.75938e-216
322	322	CA1	ATP6V1G2	0.530185	4.26601e-214
323	323	CA1	FKBP1B	1.12351	5.45574e-214
324	324	CA1	ATP6V1E1	0.516032	5.5052e-214
326	326	CA1	DLG3	0.948646	5.75595e-212
327	327	CA1	CADPS	0.668202	1.62196e-211
328	328	CA1	PTPRN	0.875389	2.22761e-210
329	329	CA1	PPP3CB	0.597931	5.90458e-210
330	330	CA1	CPNE8	1.21192	8.52518e-210
331	331	CA1	SPHKAP	0.798476	3.04102e-209
332	332	CA1	NCEH1	0.910155	1.01521e-208
333	333	CA1	DLGAP4	0.663065	3.90212e-205
334	334	CA1	CALN1	0.739967	7.28235e-205
335	335	CA1	SLC24A3	0.690084	7.55032e-205
336	336	CA1	LANCL2	0.967504	1.79789e-204
337	337	CA1	EPHA5	1.01005	1.98853e-204
338	338	CA1	AP2B1	0.546781	4.5596e-204
339	339	CA1	OLFM3	1.081	2.24482e-203
341	341	CA1	SATB2	1.68438	7.90959e-202
342	342	CA1	CACNG8	0.785756	8.99588e-201
343	343	CA1	FRRS1L	0.739063	9.42277e-201
344	344	CA1	PLPPR3	1.03864	9.68854e-201
345	345	CA1	TOLLIP	0.549853	9.91284e-201
346	346	CA1	BSCL2	0.542877	1.57866e-200
347	347	CA1	DLG4	0.534969	8.65405e-200
348	348	CA1	ATL1	0.709691	5.6868e-199
349	349	CA1	QPCT	1.11281	3.2864e-198
350	350	CA1	AFAP1	1.08741	4.98128e-198
351	351	CA1	ITFG1	0.621962	3.83662e-197
352	352	CA1	DMD	0.711446	8.98867e-197
353	353	CA1	CLSTN3	0.650558	5.57002e-196
354	354	CA1	REPS2	0.758541	8.56462e-196
356	356	CA1	ETV5	0.8701	5.37336e-194
357	357	CA1	EFNA3	1.15766	1.80562e-193
358	358	CA1	SYT4	0.704383	1.89473e-193
360	360	CA1	RALYL	0.96486	3.98794e-193
361	361	CA1	ANO3	0.882425	6.36277e-193
362	362	CA1	GRIN2A	0.775041	8.96135e-193
363	363	CA1	GOT1	0.583781	2.57913e-192
364	364	CA1	STOML1	0.876729	2.57913e-192
365	365	CA1	MFSD4A	0.818646	7.55973e-192
366	366	CA1	WSCD2	0.793518	1.00133e-191
367	367	CA1	SYT16	0.97263	2.0374e-191
368	368	CA1	GNB5	0.832207	3.02413e-191
369	369	CA1	OXCT1	0.883543	4.78859e-191
371	371	CA1	HOMER1	0.780702	9.89827e-190
372	372	CA1	ASTN1	0.781111	4.27103e-189
373	373	CA1	APBA2	0.581878	6.92734e-189
374	374	CA1	SMPD3	0.898894	7.83355e-189
375	375	CA1	KCNIP4	0.791618	2.49353e-188
377	377	CA1	MLF2	0.505006	4.8047e-188
378	378	CA1	SYN1	0.558822	6.50069e-188
379	379	CA1	UNC13A	0.68755	1.58275e-187
380	380	CA1	IQSEC2	0.723946	3.50363e-187
381	381	CA1	AFF2	0.815315	4.30041e-187
382	382	CA1	CYP26B1	1.42571	1.38644e-185
383	383	CA1	TUBB2A	0.572304	1.66772e-185
384	384	CA1	SCN2A	0.776196	1.77185e-185
385	385	CA1	JPH4	0.624658	1.18652e-184
386	386	CA1	CREG2	0.617484	1.4826e-184
387	387	CA1	SOWAHA	0.700868	2.86327e-184
388	388	CA1	PPP2R2B	0.517223	3.11016e-184
389	389	CA1	NRIP1	0.822375	8.96418e-184
390	390	CA1	ADGRB3	0.851792	1.42165e-183
391	391	CA1	WARS	0.644492	3.90584e-183
392	392	CA1	TRAPPC6B	0.657919	6.30443e-183
393	393	CA1	C2orf72	0.59015	8.25947e-183
394	394	CA1	TSPAN13	0.749176	8.96171e-182
396	396	CA1	RNF11	0.500898	4.62413e-181
399	399	CA1	ANKRD33B	1.02996	1.03949e-180
400	400	CA1	YWHAB	0.542577	1.46836e-180
401	401	CA1	NEUROD1	1.10837	3.89667e-180
402	402	CA1	EPCAM	1.13438	5.89853e-179
403	403	CA1	EPHA6	0.821764	1.07746e-178
404	404	CA1	CCSER1	0.862161	3.6746e-178
406	406	CA1	RBP4	0.907465	1.31824e-177
407	407	CA1	ULK1	0.740345	3.18135e-177
408	408	CA1	NYAP2	1.10606	1.46664e-176
409	409	CA1	HOPX	0.535528	2.296e-176
410	410	CA1	STXBP5L	0.664718	2.32842e-176
411	411	CA1	TMEM271	0.778004	1.13079e-174
412	412	CA1	NIPSNAP1	0.772522	3.02817e-174
413	413	CA1	ARHGEF3	0.851012	3.18284e-174
414	414	CA1	SPINT2	0.642225	3.76527e-174
415	415	CA1	SPRYD3	0.544429	5.57778e-174
416	416	CA1	CCDC106	0.706215	6.50255e-174
417	417	CA1	ANKS1B	0.502776	8.61038e-174
418	418	CA1	ABRACL	1.00316	5.15132e-173
419	419	CA1	LUZP2	0.948449	5.26625e-173
420	420	CA1	IGSF21	0.73882	7.23824e-173
421	421	CA1	VSTM2L	0.677427	8.27733e-172
422	422	CA1	COX7A2L	0.596692	1.03798e-171
423	423	CA1	ZNF184	1.01023	1.77402e-171
424	424	CA1	ADRA1D	1.69478	2.65528e-171
425	425	CA1	KIT	0.915971	2.99268e-171
426	426	CA1	AP1M1	0.68882	3.59498e-171
427	427	CA1	RTN4RL1	0.890297	6.79321e-171
428	428	CA1	EPHA4	0.867442	7.22506e-171
430	430	CA1	EGR3	0.888841	1.11957e-170
432	432	CA1	TSPOAP1	0.606546	2.49452e-169
433	433	CA1	INA	0.638276	6.25253e-169
434	434	CA1	CYFIP2	0.520409	7.29827e-169
435	435	CA1	ZBTB18	0.530615	3.14685e-168
436	436	CA1	CAMTA2	0.664804	4.73676e-168
438	438	CA1	NAPB	0.558861	6.37276e-168
439	439	CA1	BEX2	0.570715	2.29419e-167
441	441	CA1	ANKRD34A	0.816727	1.58928e-166
442	442	CA1	ATG101	0.892274	1.69814e-166
443	443	CA1	SVOP	0.736909	2.72571e-166
444	444	CA1	ACOT7	0.523326	8.56356e-166
445	445	CA1	LRRC73	0.978639	1.19268e-165
446	446	CA1	PCSK2	0.914192	2.09575e-165
447	447	CA1	NRSN1	0.847329	6.31039e-165
448	448	CA1	SOGA3	0.530963	1.18435e-163
449	449	CA1	SYT17	0.745655	2.1358e-163
450	450	CA1	TNNT1	1.11495	5.41334e-163
452	452	CA1	TMEM178B	0.923713	1.68394e-162
453	453	CA1	SNTG1	0.676654	2.88316e-161
454	454	CA1	CNTNAP2	0.851199	8.06006e-161
455	455	CA1	PFKL	0.647073	1.02988e-160
456	456	CA1	ELFN2	0.86716	9.06366e-160
458	458	CA1	NCOA7	0.587664	3.00561e-159
459	459	CA1	TTC9	1.05406	2.09543e-158
460	460	CA1	TESC	0.933723	2.71875e-158
461	461	CA1	RTN4RL2	0.882307	4.35299e-158
462	462	CA1	FAM171A2	0.677504	8.52341e-158
463	463	CA1	PAM	0.683134	1.17168e-157
464	464	CA1	CRIM1	0.65995	2.03884e-157
465	465	CA1	HNRNPLL	0.591414	1.1337e-156
466	466	CA1	YARS	0.7046	1.23353e-156
467	467	CA1	NPDC1	0.504248	4.62954e-156
468	468	CA1	NECTIN1	0.736424	1.19643e-155
469	469	CA1	QSOX1	0.786152	1.29858e-155
470	470	CA1	WDR7	0.648375	4.75042e-155
471	471	CA1	KLF16	0.80674	2.69036e-154
472	472	CA1	PPP4R4	0.769974	2.74266e-154
473	473	CA1	PFKM	0.528171	3.17954e-154
474	474	CA1	PRKCA	0.762555	6.03076e-154
476	476	CA1	TPRG1L	0.634634	1.03784e-152
477	477	CA1	JPH3	0.548608	1.3385e-152
480	480	CA1	DPF1	0.675681	4.2895e-151
481	481	CA1	FBXL16	0.587472	7.05791e-151
482	482	CA1	GFOD1	0.672777	7.46332e-151
483	483	CA1	LMTK3	0.59932	1.98309e-150
484	484	CA1	PRSS12	1.79657	7.174e-150
485	485	CA1	TBCD	0.665534	8.38236e-150
486	486	CA1	KIAA0513	0.546993	1.19116e-149
488	488	CA1	C1QL2	0.67273	6.83425e-149
489	489	CA1	LRRN2	0.866112	1.1213e-148
490	490	CA1	SHISA7	0.849388	1.53152e-148
491	491	CA1	GABRA5	0.677966	8.13846e-147
492	492	CA1	NDUFC2	0.66346	8.1854e-147
493	493	CA1	MAPRE3	0.506822	2.46772e-146
494	494	CA1	LIN7B	0.791592	8.91691e-146
497	497	CA1	SYNJ1	0.614514	2.77189e-144
498	498	CA1	MYH10	0.669218	2.77708e-144
499	499	CA1	SLIT3	0.762894	2.99125e-144
500	500	CA1	CMIP	0.634489	9.09767e-144
502	502	CA1	BEX5	0.573105	5.31818e-143
503	503	CA1	TRNP1	0.770098	5.64163e-143
504	504	CA1	LSAMP	0.511522	1.43953e-142
505	505	CA1	CMTM4	0.595127	5.44695e-142
506	506	CA1	MYO16	1.39032	6.65748e-142
507	507	CA1	VDAC1	0.501773	9.04345e-142
508	508	CA1	PSMA5	0.618638	3.36205e-141
509	509	CA1	CDK14	0.709185	7.78082e-141
510	510	CA1	ADAM11	0.734021	9.31246e-141
511	511	CA1	RALB	0.634078	3.76671e-140
512	512	CA1	ZNF488	0.952067	4.593e-140
513	513	CA1	TTC9B	0.780224	1.12404e-139
516	516	CA1	BCL11A	0.664186	3.48247e-139
517	517	CA1	GLRX5	0.547385	3.86204e-139
518	518	CA1	ABHD8	0.605373	6.84418e-139
520	520	CA1	B4GALNT1	0.680928	2.85411e-138
521	521	CA1	CDKN2D	0.622327	5.8846e-138
522	522	CA1	STXBP5	0.746354	9.15588e-138
523	523	CA1	ITGA9	1.01701	1.64543e-137
524	524	CA1	MAPK11	0.915572	5.77918e-136
525	525	CA1	PTK2B	0.57171	6.78121e-136
527	527	CA1	C1orf115	0.588523	8.27464e-136
528	528	CA1	ST8SIA5	1.11654	1.10685e-135
529	529	CA1	TUBG2	0.628143	1.43721e-135
530	530	CA1	CCDC92	0.565243	1.45391e-134
531	531	CA1	CAMK2D	0.591162	2.89083e-134
532	532	CA1	GOLGA7B	0.600559	3.44906e-134
534	534	CA1	ELMOD1	0.593414	1.63677e-133
535	535	CA1	MTHFD1	0.758433	1.63892e-133
536	536	CA1	SLC4A8	0.543725	2.55435e-133
537	537	CA1	SCG2	0.559591	4.47419e-133
538	538	CA1	AZIN2	0.862485	4.50399e-133
539	539	CA1	ARL15	0.868688	7.98537e-133
540	540	CA1	TENM2	0.891418	1.16282e-132
541	541	CA1	CTNNA2	0.551938	1.22105e-131
542	542	CA1	LRRTM1	0.725191	1.82315e-131
544	544	CA1	PLCB1	0.695488	2.55848e-131
545	545	CA1	TNFRSF21	0.636258	2.56316e-131
547	547	CA1	ACOT8	0.707836	1.2306e-130
549	549	CA1	CHCHD6	0.583041	2.08209e-130
550	550	CA1	MAP2K4	0.514807	4.32519e-130
551	551	CA1	LIMD2	0.73915	6.12085e-130
552	552	CA1	SH3GL2	0.509362	6.25958e-130
553	553	CA1	KCNJ3	0.874809	8.55897e-130
556	556	CA1	NOVA2	0.711663	7.16636e-129
557	557	CA1	CNRIP1	0.600423	1.09788e-128
559	559	CA1	PPP1R7	0.564885	4.05521e-128
561	561	CA1	PKDCC	1.4496	5.38838e-128
562	562	CA1	TLK1	0.598805	3.32732e-127
563	563	CA1	CCSAP	0.52819	3.69284e-127
564	564	CA1	UBQLN2	0.534007	3.98168e-127
565	565	CA1	GPR26	1.58036	6.15201e-127
566	566	CA1	RGS4	0.646248	6.84159e-127
567	567	CA1	GABRG2	0.572255	9.05849e-127
569	569	CA1	GABRB3	0.685941	1.75913e-126
570	570	CA1	SAMD5	1.73943	2.42951e-126
571	571	CA1	SOX11	1.15054	3.43549e-126
572	572	CA1	RASGRF1	0.84432	8.17697e-126
573	573	CA1	CARTPT	1.07389	9.07184e-126
574	574	CA1	TWF2	0.737591	9.67999e-126
576	576	CA1	CCN2	0.714547	1.68665e-125
577	577	CA1	AK4	0.67245	1.85442e-125
578	578	CA1	ADAM23	0.648567	1.99307e-125
579	579	CA1	CNR1	0.621143	1.0174e-124
580	580	CA1	ATP6V1D	0.518291	1.79895e-124
581	581	CA1	GDAP1	0.501267	1.84739e-124
582	582	CA1	NME2	0.559001	2.38902e-124
584	584	CA1	KIAA1211L	0.598142	7.22386e-124
585	585	CA1	SEZ6L2	0.593428	1.07058e-123
588	588	CA1	KL	1.71033	3.88241e-123
589	589	CA1	PIK3R2	0.635409	3.91736e-123
590	590	CA1	ELAVL4	0.653146	4.53325e-123
591	591	CA1	ACTN1	0.589072	9.86892e-123
592	592	CA1	TCEAL1	0.618032	1.78699e-122
593	593	CA1	DAB1	0.711207	1.89625e-122
594	594	CA1	CHRNB2	0.826999	3.34501e-122
598	598	CA1	PRICKLE1	0.867954	1.09508e-121
600	600	CA1	SNX10	0.67665	4.01837e-121
602	602	CA1	SCN4B	0.760094	5.75575e-121
603	603	CA1	LDB2	0.793017	1.55525e-120
605	605	CA1	PNCK	0.56322	6.55694e-120
606	606	CA1	KCTD1	0.682455	7.51459e-120
607	607	CA1	ZNF189	0.520061	1.44252e-119
608	608	CA1	SHANK2	0.701495	2.07741e-119
609	609	CA1	ATP2B4	0.587453	2.43706e-119
610	610	CA1	CAMKK1	0.594341	5.23377e-119
612	612	CA1	AASDHPPT	0.518463	7.71257e-119
613	613	CA1	DPP6	0.523504	1.54492e-118
614	614	CA1	RANGAP1	0.552661	2.00332e-118
615	615	CA1	SEH1L	0.646359	2.09246e-118
618	618	CA1	GPRASP2	0.625782	6.2331e-118
619	619	CA1	AKIRIN2	0.522585	1.1131e-117
620	620	CA1	WDR47	0.596651	2.28735e-117
621	621	CA1	PIP5K1C	0.562562	3.46379e-117
622	622	CA1	L1CAM	0.646052	4.09996e-117
623	623	CA1	PID1	0.729627	6.0728e-117
625	625	CA1	SYN3	0.900224	1.57122e-116
626	626	CA1	PAK3	0.51746	1.68985e-116
627	627	CA1	PODXL2	0.585467	2.64274e-116
628	628	CA1	RASGEF1A	0.694268	2.66035e-116
631	631	CA1	LRFN2	1.27599	7.50326e-116
633	633	CA1	CELF3	0.593261	1.18882e-115
635	635	CA1	CHCHD10	0.50233	1.76357e-114
636	636	CA1	EGR1	0.78296	2.05384e-114
637	637	CA1	ME3	0.610486	2.39855e-114
638	638	CA1	CACNG4	0.971218	3.04451e-114
640	640	CA1	GPR22	0.788203	3.60164e-114
641	641	CA1	BCL7B	0.635062	1.02118e-113
643	643	CA1	CALU	0.555804	7.93769e-113
644	644	CA1	PNMA8B	0.588208	1.13804e-112
646	646	CA1	CSRNP3	0.696465	1.75284e-112
648	648	CA1	ADGRL3	0.545505	1.07857e-111
649	649	CA1	HAPLN4	1.49029	1.66676e-111
651	651	CA1	MECR	0.660052	3.21198e-111
652	652	CA1	HS3ST2	1.44063	4.22364e-111
653	653	CA1	LMBRD2	0.700586	4.3062e-111
654	654	CA1	CDC40	0.622045	5.45046e-111
657	657	CA1	HTR2A	1.92226	1.93505e-110
658	658	CA1	SORCS3	1.37453	3.21822e-110
659	659	CA1	PRR7	0.640574	3.93272e-110
660	660	CA1	CADM1	0.621106	4.78584e-110
662	662	CA1	CHMP1A	0.604718	1.33686e-109
663	663	CA1	SAMD14	0.641985	2.13055e-109
664	664	CA1	WIF1	1.40115	2.72283e-109
665	665	CA1	PRR36	0.883498	1.09632e-108
666	666	CA1	STIM2	0.730635	1.26601e-108
667	667	CA1	C16orf58	0.558742	2.69149e-108
671	671	CA1	SLC25A11	0.505812	1.85295e-107
672	672	CA1	RGS7BP	0.56394	2.38869e-107
673	673	CA1	LZTS1	1.06386	3.58823e-107
674	674	CA1	TEX2	0.54011	3.70644e-107
676	676	CA1	GRB2	0.540595	5.21548e-107
677	677	CA1	BAG5	0.568952	5.96235e-107
678	678	CA1	LMO7	0.62203	6.51119e-107
680	680	CA1	EFR3A	0.604862	1.657e-106
681	681	CA1	PDK2	0.582974	3.60791e-106
682	682	CA1	MYO5A	0.532847	7.71756e-106
684	684	CA1	CBARP	0.662231	1.47044e-105
685	685	CA1	LGMN	0.557471	3.75335e-105
687	687	CA1	CAMK4	1.05149	6.57255e-105
688	688	CA1	SEMA4F	0.835268	2.94494e-104
689	689	CA1	TMEM246	0.68097	5.67705e-104
690	690	CA1	MMP24OS	0.553491	1.16076e-103
691	691	CA1	SLC9A6	0.506171	1.58791e-103
692	692	CA1	KCNK4	1.08418	3.34231e-103
693	693	CA1	MTUS2	1.06285	3.52358e-103
694	694	CA1	RAPGEFL1	0.575529	1.722e-102
695	695	CA1	SRRM4	0.813085	3.01645e-102
699	699	CA1	SOHLH1	1.34553	1.4366e-101
700	700	CA1	CAMKK2	0.747402	1.82915e-101
701	701	CA1	CACNA1H	1.17449	3.11644e-101
702	702	CA1	FBXO34	0.610502	3.36319e-101
703	703	CA1	TCP11L1	0.550352	4.96021e-101
704	704	CA1	ANO5	0.635179	5.97514e-101
705	705	CA1	KALRN	0.52531	2.20953e-100
706	706	CA1	ZER1	0.541437	3.44771e-100
708	708	CA1	CD200	0.543371	9.47603e-100
709	709	CA1	REEP1	0.584655	9.48774e-100
711	711	CA1	CEMIP2	0.621922	1.08318e-99
712	712	CA1	VSTM2A	0.634146	1.12626e-99
713	713	CA1	FBXW7	0.632854	1.41716e-99
714	714	CA1	PCDH1	0.505551	2.19515e-99
715	715	CA1	ST8SIA3	0.921578	3.43407e-99
716	716	CA1	UNC5A	0.682229	4.196e-99
718	718	CA1	ZCCHC12	0.572431	6.64657e-99
719	719	CA1	R3HDM1	0.58602	6.76539e-99
722	722	CA1	ADGRB1	0.72945	1.40819e-98
724	724	CA1	BEGAIN	0.702722	4.44799e-98
726	726	CA1	MEIS3	0.528987	6.55043e-98
728	728	CA1	FSCN1	0.601449	1.92748e-97
729	729	CA1	PPM1E	0.531532	2.17197e-97
730	730	CA1	ZPR1	0.6259	2.71325e-97
731	731	CA1	TMEM163	0.776822	2.83599e-97
733	733	CA1	OCIAD2	0.594016	9.20604e-97
734	734	CA1	GRM5	0.79529	1.8447e-96
735	735	CA1	LRP12	0.659809	3.54465e-96
737	737	CA1	SLC25A12	0.553203	5.0061e-96
738	738	CA1	CORO1A	0.59941	1.6784e-95
743	743	CA1	GABRB1	0.583799	1.33508e-94
744	744	CA1	GSKIP	0.543076	1.53791e-94
746	746	CA1	PLXDC2	0.514172	2.16914e-94
747	747	CA1	EXT1	0.827666	2.20017e-94
748	748	CA1	SNAP47	0.552766	4.80874e-94
749	749	CA1	SV2A	0.513699	5.80822e-94
750	750	CA1	TMEM181	0.522959	5.81125e-94
752	752	CA1	SUSD4	0.508161	7.6653e-94
754	754	CA1	GPD1L	0.55494	9.59245e-94
755	755	CA1	UHMK1	0.526036	1.03333e-93
757	757	CA1	FILIP1	0.778339	2.45253e-93
758	758	CA1	ARF5	0.545927	6.6216e-93
759	759	CA1	EXTL3	0.62952	6.7898e-93
761	761	CA1	CMAS	0.558587	1.73241e-92
762	762	CA1	C11orf95	0.684048	3.35938e-92
763	763	CA1	AAK1	0.551256	5.93861e-92
765	765	CA1	FAXC	0.70194	1.14565e-91
766	766	CA1	NCK2	0.515202	1.22095e-91
767	767	CA1	CDKL5	0.661592	1.34469e-91
768	768	CA1	CHD5	0.509123	1.99566e-91
769	769	CA1	IMP3	0.55214	2.39208e-91
770	770	CA1	FABP7	0.50115	2.42339e-91
771	771	CA1	SLC6A7	1.09488	2.85413e-91
772	772	CA1	RSPO3	0.973444	3.28481e-91
774	774	CA1	USP5	0.575385	7.69959e-91
780	780	CA1	LYRM9	0.723358	2.08651e-90
781	781	CA1	PEX11B	0.572562	2.12077e-90
783	783	CA1	WDR86	1.50519	4.06042e-90
784	784	CA1	RAB39B	0.71242	1.07612e-89
785	785	CA1	PDXP	0.506157	1.07894e-89
786	786	CA1	EPDR1	0.523608	1.27041e-89
789	789	CA1	ANOS1	0.654751	7.29576e-89
790	790	CA1	KCND2	0.840532	7.85287e-89
791	791	CA1	TMEM200A	0.931987	8.81302e-89
792	792	CA1	PLEKHG5	0.538572	9.14466e-89
793	793	CA1	KLHL11	0.626192	1.8964e-88
794	794	CA1	GALNT11	0.567523	2.0312e-88
796	796	CA1	GUCY1B1	0.517402	4.10366e-88
797	797	CA1	NAP1L2	0.510772	5.28304e-88
798	798	CA1	RASAL2	0.607734	1.23589e-87
799	799	CA1	SLC7A1	0.563178	1.24323e-87
801	801	CA1	ZNF169	0.691837	1.65802e-87
802	802	CA1	RBFOX2	0.531398	1.87047e-87
806	806	CA1	SEPTIN6	0.736447	1.72953e-86
807	807	CA1	PTGES	1.78197	2.59746e-86
809	809	CA1	B9D1	0.671925	6.84628e-86
810	810	CA1	TMEM268	0.697451	1.19093e-85
811	811	CA1	UBALD1	0.575322	1.20693e-85
813	813	CA1	HRH3	1.50785	2.08616e-85
814	814	CA1	MAST1	0.544007	2.60501e-85
815	815	CA1	PTPRE	0.582265	2.89148e-85
817	817	CA1	CLVS2	0.711971	4.3773e-85
818	818	CA1	SGTB	0.637138	4.59705e-85
821	821	CA1	DUSP8	0.505733	2.35318e-84
822	822	CA1	KIF21B	0.646538	2.43639e-84
826	826	CA1	NEDD4L	0.644846	3.76171e-84
827	827	CA1	SLITRK2	0.571086	4.33368e-84
829	829	CA1	TUNAR	0.734173	4.7565e-84
831	831	CA1	ALPK1	0.957923	1.2929e-83
832	832	CA1	HTR2C	1.11456	1.83133e-83
833	833	CA1	SLC16A2	0.564626	2.15452e-83
834	834	CA1	PGBD1	0.902163	2.42392e-83
836	836	CA1	PDS5B	0.527913	3.89376e-83
837	837	CA1	COL4A2	1.10296	4.61957e-83
839	839	CA1	DCAF11	0.563941	9.30529e-83
840	840	CA1	FOCAD	0.538298	1.28143e-82
841	841	CA1	SNRK	0.602707	1.59108e-82
843	843	CA1	TMEM178A	0.533611	1.87255e-82
844	844	CA1	MFSD12	0.533757	2.19306e-82
845	845	CA1	AFF3	0.604864	3.15301e-82
847	847	CA1	TMEM151A	0.524973	3.54319e-82
851	851	CA1	LRRC3B	0.736982	9.08001e-82
853	853	CA1	TPGS1	0.5819	2.00698e-81
854	854	CA1	ZNF667	0.604399	3.37795e-81
855	855	CA1	SHISAL1	0.798455	4.96707e-81
856	856	CA1	BCAS4	0.54135	5.87517e-81
858	858	CA1	PTPN4	0.519376	8.95305e-81
863	863	CA1	VLDLR	0.70171	2.33306e-80
865	865	CA1	CCDC189	0.745822	9.10062e-80
866	866	CA1	CNIH3	0.759609	1.07435e-79
867	867	CA1	ATCAY	0.519089	1.14397e-79
870	870	CA1	CACNB3	0.574117	2.25674e-79
871	871	CA1	PAK1	0.569452	2.35244e-79
872	872	CA1	TRAF3	0.508726	5.71183e-79
873	873	CA1	LPCAT4	0.528921	1.1865e-78
876	876	CA1	ETV1	0.589423	1.80322e-78
877	877	CA1	PISD	0.544397	1.94298e-78
879	879	CA1	OCRL	0.59775	2.09841e-78
882	882	CA1	DAGLB	0.721986	5.47779e-78
883	883	CA1	PNMA5	0.727848	7.93409e-78
886	886	CA1	KATNB1	0.699634	3.17311e-77
890	890	CA1	KNCN	1.8621	7.56534e-77
893	893	CA1	NR4A3	0.671227	1.29539e-76
897	897	CA1	HOMER2	0.537974	3.87441e-76
898	898	CA1	RAVER2	0.590957	4.57833e-76
899	899	CA1	SPEF1	1.11999	4.699e-76
900	900	CA1	FRMPD4	0.777709	4.86495e-76
901	901	CA1	KCTD2	0.538632	6.77157e-76
902	902	CA1	KIAA1671	0.542302	1.00639e-75
903	903	CA1	SSTR2	0.695032	1.02929e-75
904	904	CA1	GFRA2	0.718323	1.06905e-75
906	906	CA1	PARP8	0.518081	1.84e-75
907	907	CA1	COQ8A	0.697243	2.27361e-75
909	909	CA1	SEZ6	0.884008	3.15779e-75
911	911	CA1	NSMCE3	0.57511	6.32276e-75
912	912	CA1	ARHGAP44	0.51456	8.94658e-75
913	913	CA1	MAS1	0.679674	2.11877e-74
922	922	CA1	GPR83	0.898025	8.49167e-73
923	923	CA1	RTN2	0.566837	1.41137e-72
924	924	CA1	RGS2	0.60989	1.75074e-72
926	926	CA1	MAPKAPK5	0.534036	2.85595e-72
934	934	CA1	GLOD4	0.527964	8.43193e-72
936	936	CA1	INAFM1	0.522756	1.04132e-71
938	938	CA1	GABRA4	0.631383	1.59041e-71
940	940	CA1	NKRF	0.516714	2.02276e-71
941	941	CA1	DIO2	0.967115	3.13477e-71
943	943	CA1	HSPBP1	0.680544	5.13795e-71
944	944	CA1	GLRB	0.597107	5.65688e-71
945	945	CA1	BOP1	0.529161	5.76233e-71
948	948	CA1	LRP3	0.54282	7.75503e-71
949	949	CA1	KRT222	0.593981	7.94225e-71
951	951	CA1	MTMR7	0.671521	1.05131e-70
952	952	CA1	ADGRL1	0.514247	1.06341e-70
954	954	CA1	KCNMB2	0.823899	1.94995e-70
955	955	CA1	UBE2O	0.547987	2.35192e-70
956	956	CA1	KCNT1	0.604482	2.87723e-70
957	957	CA1	DYRK2	0.799598	3.22338e-70
958	958	CA1	CHGA	0.521259	3.27723e-70
961	961	CA1	SCYL1	0.532184	5.55597e-70
965	965	CA1	CEBPA	0.522724	1.29897e-69
969	969	CA1	PRKCD	0.872519	2.42273e-69
970	970	CA1	ANTKMT	0.503942	3.95138e-69
971	971	CA1	ASIC2	0.829537	4.70854e-69
972	972	CA1	JADE2	0.642218	5.85008e-69
973	973	CA1	PDP1	0.690923	6.10106e-69
977	977	CA1	SLITRK1	0.746462	1.03731e-68
978	978	CA1	MACROD2	0.897209	1.90788e-68
980	980	CA1	TACC2	0.538743	2.14195e-68
982	982	CA1	INAFM2	0.586091	2.45048e-68
988	988	CA1	FBXO33	0.686457	1.18795e-67
990	990	CA1	ADGRB2	0.909947	1.25046e-67
992	992	CA1	PCDHAC2	0.703277	2.23459e-67
996	996	CA1	TMEM242	0.619553	5.26565e-67
997	997	CA1	GALNT17	0.929954	5.99799e-67
1003	1003	CA1	CDH10	0.751615	1.20159e-66
1005	1005	CA1	ERICH3	0.504055	1.61997e-66
1006	1006	CA1	CHRD	0.537171	1.75577e-66
1008	1008	CA1	DHRS11	0.71479	2.94163e-66
1010	1010	CA1	C2CD2L	0.542931	3.19108e-66
1011	1011	CA1	RIMS4	0.505043	3.84197e-66
1014	1014	CA1	MAGEE1	0.633576	7.82623e-66
1019	1019	CA1	NCBP2AS2	0.515287	3.06374e-65
1020	1020	CA1	CEP126	0.626883	3.32604e-65
1021	1021	CA1	RRP1	0.528254	4.63349e-65
1027	1027	CA1	FAM155A	0.527019	1.13356e-64
1031	1031	CA1	RBM11	0.854082	2.12626e-64
1034	1034	CA1	THSD4	0.964735	2.44127e-64
1037	1037	CA1	FBXL2	0.640236	3.54805e-64
1041	1041	CA1	CCDC85C	0.541249	6.34044e-64
1044	1044	CA1	ZMYND19	0.580119	7.6584e-64
1046	1046	CA1	SRSF12	0.52679	1.1268e-63
1049	1049	CA1	TMEM240	0.537373	1.86061e-63
1050	1050	CA1	TBC1D30	0.725875	1.97453e-63
1051	1051	CA1	LIG4	0.528393	2.16202e-63
1053	1053	CA1	FBXL19	0.540311	3.47736e-63
1056	1056	CA1	LNX1	0.762253	1.0125e-62
1057	1057	CA1	SIDT1	0.687733	1.05957e-62
1060	1060	CA1	AVPI1	0.82252	3.11284e-62
1064	1064	CA1	KITLG	0.898203	7.71796e-62
1066	1066	CA1	MSTO1	0.59895	1.20623e-61
1067	1067	CA1	HSPA14-1	0.598651	1.97346e-61
1071	1071	CA1	SLC35F1	0.548678	4.05501e-61
1072	1072	CA1	TPH2	1.61216	7.42774e-61
1076	1076	CA1	PRKCI	0.50098	9.09346e-61
1077	1077	CA1	LRRTM3	0.664615	1.15592e-60
1078	1078	CA1	MARK4	0.737887	1.18349e-60
1086	1086	CA1	NAGPA	0.951717	5.26166e-60
1088	1088	CA1	SCAI	0.592489	5.59964e-60
1090	1090	CA1	RNFT2	0.520058	8.88909e-60
1100	1100	CA1	TENM1	0.672649	6.67071e-59
1102	1102	CA1	BRF2	0.518976	7.46231e-59
1103	1103	CA1	SLBP	0.510239	8.68398e-59
1104	1104	CA1	MAP3K9	0.512231	9.42738e-59
1112	1112	CA1	EMC9	0.658334	2.28018e-58
1113	1113	CA1	DRP2	0.73697	2.43735e-58
1115	1115	CA1	AP3B2	0.818094	3.54468e-58
1118	1118	CA1	RNF165	0.594994	3.94788e-58
1120	1120	CA1	SPATA2	0.521867	4.6048e-58
1122	1122	CA1	RFC5	0.696929	6.76546e-58
1123	1123	CA1	ZFYVE27	0.503808	7.8353e-58
1129	1129	CA1	C16orf74	0.991093	3.72964e-57
1130	1130	CA1	MAPK13	1.19157	3.75727e-57
1137	1137	CA1	IRS2	0.75735	1.16257e-56
1139	1139	CA1	FRY	0.699913	1.40261e-56
1141	1141	CA1	AMACR	0.603776	2.45325e-56
1149	1149	CA1	CHST8	1.50361	6.29661e-56
1151	1151	CA1	RMC1	0.570319	7.15713e-56
1155	1155	CA1	RAB27B	0.751403	9.52134e-56
1161	1161	CA1	LRRC20	0.567785	1.97886e-55
1165	1165	CA1	ACTL6B	0.615402	2.92661e-55
1169	1169	CA1	TCERG1L	0.611029	8.24283e-55
1174	1174	CA1	DBNDD1	0.529911	1.27546e-54
1177	1177	CA1	PDE10A	0.616829	1.52355e-54
1179	1179	CA1	CPNE7	1.294	2.74217e-54
1182	1182	CA1	SRD5A1	0.503953	3.20354e-54
1185	1185	CA1	STS	0.533646	4.34795e-54
1188	1188	CA1	MCAT	0.502569	6.05913e-54
1191	1191	CA1	CDR2	0.6319	1.38298e-53
1196	1196	CA1	ASB6	0.58313	3.29365e-53
1200	1200	CA1	SNUPN	0.548002	4.38321e-53
1201	1201	CA1	EXTL1	0.757505	5.53269e-53
1204	1204	CA1	BABAM2	0.523626	1.10598e-52
1208	1208	CA1	NGEF	0.555821	2.63429e-52
1213	1213	CA1	FSD1	0.568468	4.45773e-52
1223	1223	CA1	FGD1	0.645997	1.2238e-51
1225	1225	CA1	SLCO1C1	0.66353	1.38266e-51
1227	1227	CA1	KCNV1	0.879385	1.57071e-51
1229	1229	CA1	RAI1	0.611935	1.7353e-51
1235	1235	CA1	CNNM1	0.906899	3.55801e-51
1236	1236	CA1	ATP7B	0.852266	3.56371e-51
1239	1239	CA1	C9orf116	0.576425	4.97409e-51
1242	1242	CA1	GNA14	0.530461	5.83912e-51
1243	1243	CA1	INPP5A	0.505646	6.49786e-51
1247	1247	CA1	TUSC2	0.503321	9.25815e-51
1258	1258	CA1	GNAL	0.51954	3.11061e-50
1259	1259	CA1	SPRY1	0.771035	3.15562e-50
1261	1261	CA1	SLC7A10	1.17076	3.82226e-50
1267	1267	CA1	ATXN7L2	0.608846	8.05671e-50
1268	1268	CA1	COL4A1	0.76971	8.49123e-50
1269	1269	CA1	DACH2	0.844864	8.89557e-50
1272	1272	CA1	DGKA	0.699673	1.32595e-49
1275	1275	CA1	SNX32	1.15267	1.60559e-49
1279	1279	CA1	TRERF1	0.959932	2.439e-49
1286	1286	CA1	SPATA2L	0.749065	3.66066e-49
1287	1287	CA1	PRPS2	0.900257	3.76459e-49
1289	1289	CA1	KCNK9	1.62687	4.32986e-49
1291	1291	CA1	PPM1M	0.732613	5.20029e-49
1293	1293	CA1	EGR4	1.43746	5.35146e-49
1302	1302	CA1	SHISA2	1.40534	1.03877e-48
1306	1306	CA1	ENDOG	0.507649	1.41953e-48
1313	1313	CA1	TMEM198	0.957345	5.64117e-48
1314	1314	CA1	NOCT	0.583447	6.00184e-48
1318	1318	CA1	CHRM3	1.08173	1.26948e-47
1324	1324	CA1	ADGRA1	0.932643	1.80954e-47
1328	1328	CA1	TOX2	0.722111	2.3166e-47
1338	1338	CA1	SLITRK5	0.695818	4.62936e-47
1340	1340	CA1	ASPDH	0.692745	5.59076e-47
1341	1341	CA1	CFAP221	0.819551	5.84475e-47
1343	1343	CA1	TOMM40	0.514407	6.48817e-47
1351	1351	CA1	MAP7D2	0.5708	1.52036e-46
1362	1362	CA1	KCNH2	0.900712	3.12564e-46
1365	1365	CA1	CAPN5	0.609771	4.59717e-46
1366	1366	CA1	SEMA3D	1.01268	4.78738e-46
1373	1373	CA1	MAP2K6	0.663421	7.02793e-46
1374	1374	CA1	ACTR3C	0.516704	7.07513e-46
1377	1377	CA1	TRPC4	1.01604	8.24304e-46
1381	1381	CA1	PACRG	0.552151	1.08846e-45
1392	1392	CA1	CCDC112	0.554327	3.51735e-45
1394	1394	CA1	NOP16	0.580361	3.77759e-45
1396	1396	CA1	C16orf87	0.581477	4.47355e-45
1400	1400	CA1	PGBD5	0.515799	6.705e-45
1401	1401	CA1	TNFRSF14	1.0158	8.57338e-45
1405	1405	CA1	CSMD1	0.596714	9.21028e-45
1406	1406	CA1	KIF17	0.814395	9.58282e-45
1407	1407	CA1	GJB6	0.662108	9.64874e-45
1416	1416	CA1	TIAM2	1.01032	2.71438e-44
1417	1417	CA1	PLCL2	0.586955	3.10698e-44
1429	1429	CA1	NUDCD1	0.51093	1.22989e-43
1431	1431	CA1	MAPK15	1.01814	1.45217e-43
1435	1435	CA1	OTUB2	1.41726	2.27128e-43
1438	1438	CA1	CPTP	0.548712	2.88253e-43
1441	1441	CA1	CPT1C	0.539414	3.43949e-43
1442	1442	CA1	ARC	0.829821	3.58588e-43
1445	1445	CA1	ZNF804A	0.801588	5.0667e-43
1459	1459	CA1	PTPN9	0.696407	1.27072e-42
1460	1460	CA1	PGAM5	0.703386	1.44565e-42
1463	1463	CA1	XYLT1	0.541931	2.15157e-42
1468	1468	CA1	GMDS	0.60337	2.36584e-42
1482	1482	CA1	SPATA33	0.513171	8.17969e-42
1483	1483	CA1	LRRC4C	0.567388	8.9595e-42
1492	1492	CA1	ZWINT	1.20549	2.18788e-41
1497	1497	CA1	DGKH	0.910897	3.52515e-41
1499	1499	CA1	PRR29	0.972886	3.61779e-41
1512	1512	CA1	RFK	1.07968	1.13604e-40
1514	1514	CA1	RCN1	0.505576	1.24092e-40
1515	1515	CA1	E2F3	0.588328	1.33909e-40
1518	1518	CA1	ALKAL2	1.65125	1.6967e-40
1526	1526	CA1	RYR3	0.659911	4.71755e-40
1541	1541	CA1	DOK4	0.739599	1.2589e-39
1551	1551	CA1	GREB1L	1.12571	2.03377e-39
1552	1552	CA1	NPM3	0.587345	2.19455e-39
1554	1554	CA1	SLC35B4	0.547924	2.80565e-39
1556	1556	CA1	TRIM46	0.6847	2.92939e-39
1557	1557	CA1	RASD2	0.911936	2.97193e-39
1568	1568	CA1	LRRN1	0.653015	8.04175e-39
1576	1576	CA1	MEIS2	0.709128	1.39771e-38
1578	1578	CA1	LXN	1.15772	1.57148e-38
1580	1580	CA1	RAB36	0.525771	1.66239e-38
1590	1590	CA1	RARA	0.609424	2.85175e-38
1595	1595	CA1	THBS3	0.996698	3.54503e-38
1604	1604	CA1	NXN	0.619982	5.30375e-38
1606	1606	CA1	GDAP1L1	0.50341	5.54108e-38
1620	1620	CA1	RTBDN	1.10464	1.40937e-37
1622	1622	CA1	TMEM255B	0.953165	2.04173e-37
1625	1625	CA1	FOXO6	0.99968	2.19333e-37
1626	1626	CA1	EGR2	1.77535	2.30256e-37
1628	1628	CA1	CCDC9	0.508217	3.19412e-37
1629	1629	CA1	DPYSL4	0.51191	3.28647e-37
1632	1632	CA1	RRAS2	0.504046	3.38895e-37
1634	1634	CA1	TLNRD1	0.548822	4.22022e-37
1653	1653	CA1	TP53RK	0.505754	1.14479e-36
1677	1677	CA1	RAB3B	0.521973	9.01146e-36
1689	1689	CA1	CA7	1.0117	1.28733e-35
1690	1690	CA1	MOXD1	0.998577	1.31091e-35
1691	1691	CA1	KHDRBS2	0.821448	1.41561e-35
1697	1697	CA1	MCTP2	1.46335	1.81648e-35
1698	1698	CA1	ZDHHC14	0.67147	1.86883e-35
1721	1721	CA1	C2CD4C	0.861961	9.38513e-35
1729	1729	CA1	FAR2	0.588259	1.65019e-34
1741	1741	CA1	RBM24	0.795124	3.22631e-34
1744	1744	CA1	FAM174B	0.504139	4.12737e-34
1773	1773	CA1	WNT3	1.5213	1.71208e-33
1776	1776	CA1	ENOX1	0.569937	1.92108e-33
1777	1777	CA1	ST8SIA2	1.95458	1.98949e-33
1780	1780	CA1	PCSK1	0.704786	2.28574e-33
1788	1788	CA1	C4orf50	0.561108	3.32789e-33
1794	1794	CA1	GPR12	0.59674	4.79862e-33
1798	1798	CA1	DGKZ	0.545422	7.72882e-33
1799	1799	CA1	TRPC5	0.728921	8.45599e-33
1806	1806	CA1	NRG1	0.598149	1.00552e-32
1811	1811	CA1	TRUB1	0.501629	1.34056e-32
1823	1823	CA1	SKA3	0.924785	2.6431e-32
1829	1829	CA1	CARMIL3	0.766772	3.49799e-32
1848	1848	CA1	NOG	0.62997	7.89098e-32
1849	1849	CA1	MN1	1.40137	8.26848e-32
1850	1850	CA1	CBLN4	1.26854	9.24686e-32
1854	1854	CA1	SLC1A1	0.601031	1.13615e-31
1857	1857	CA1	PPARG	0.508531	1.32186e-31
1879	1879	CA1	LRP1B	0.655626	3.18468e-31
1880	1880	CA1	CNTN3	0.78499	3.79703e-31
1892	1892	CA1	KCNS3	0.895765	8.01713e-31
1911	1911	CA1	TMEM44	0.635784	2.00661e-30
1917	1917	CA1	PARD6A	0.561353	2.48176e-30
1918	1918	CA1	TSTD1	0.607363	2.49691e-30
1920	1920	CA1	MDGA1	0.641928	2.76988e-30
1941	1941	CA1	CYP4X1	0.586165	9.49666e-30
1943	1943	CA1	PAQR9	0.803298	9.82921e-30
1947	1947	CA1	CHRM4	1.41282	1.15177e-29
1949	1949	CA1	RPUSD3	0.56017	1.27197e-29
1951	1951	CA1	SLC9A5	0.713015	1.3977e-29
1955	1955	CA1	PTTG1	1.19618	1.66374e-29
1958	1958	CA1	MARCH4	0.852396	1.92081e-29
1966	1966	CA1	HECW1	0.541484	3.36444e-29
1972	1972	CA1	STAP1	1.83299	4.80333e-29
1976	1976	CA1	CITED4	0.517413	5.58331e-29
1978	1978	CA1	EXOSC5	0.535765	5.9222e-29
1988	1988	CA1	CLVS1	0.611515	9.74366e-29
1991	1991	CA1	ITGA8	0.709159	1.1155e-28
2010	2010	CA1	RAB37	0.542645	2.36697e-28
2020	2020	CA1	PWP2	0.599123	4.60099e-28
2021	2021	CA1	TRPV2	0.677713	4.65159e-28
2023	2023	CA1	NR4A2	0.648304	4.99225e-28
2050	2050	CA1	RHOF	0.611689	1.65415e-27
2051	2051	CA1	NEUROG2	1.00079	1.72829e-27
2052	2052	CA1	PRMT8	0.844056	1.90942e-27
2054	2054	CA1	ZNF467	0.588699	2.22322e-27
2065	2065	CA1	SLC2A12	0.603883	3.2942e-27
2082	2082	CA1	TMEM254	0.523417	7.42051e-27
2084	2084	CA1	DYNC2LI1	0.523454	8.14669e-27
2107	2107	CA1	SEMA4A	0.636814	2.05587e-26
2116	2116	CA1	SSTR4	1.30513	2.54118e-26
2123	2123	CA1	LMO1	1.09295	3.71416e-26
2137	2137	CA1	SYT12	1.02947	6.25472e-26
2138	2138	CA1	SPRED3	0.884353	6.3351e-26
2165	2165	CA1	WNT10B	0.911232	2.25703e-25
2171	2171	CA1	TPBGL	1.24549	2.97249e-25
2174	2174	CA1	CHRDL1	0.765707	3.3149e-25
2183	2183	CA1	PIK3CD	0.627743	3.90085e-25
2197	2197	CA1	HRH2	1.11312	6.79281e-25
2209	2209	CA1	HS3ST1	0.708822	1.2483e-24
2212	2212	CA1	HENMT1	0.595816	1.27792e-24
2217	2217	CA1	NOXA1	0.524787	1.42107e-24
2220	2220	CA1	PTX3	1.35591	1.67513e-24
2237	2237	CA1	ZFR2	0.577226	2.61834e-24
2256	2256	CA1	CTXN3	2.0648	4.23561e-24
2270	2270	CA1	LIPC	2.06059	6.53977e-24
2294	2294	CA1	COL26A1	0.524812	2.60356e-23
2303	2303	CA1	SLC45A1	0.756086	4.02623e-23
2318	2318	CA1	KCTD8	0.861347	6.0629e-23
2342	2342	CA1	NHLH2	0.884019	1.15525e-22
2373	2373	CA1	PTGER3	1.10359	2.66982e-22
2375	2375	CA1	RASL11A	0.839715	2.73595e-22
2377	2377	CA1	COL23A1	0.87275	2.85439e-22
2393	2393	CA1	XK	0.668453	4.88478e-22
2400	2400	CA1	TSPAN5	0.771086	5.86012e-22
2403	2403	CA1	DLK2	0.688496	6.19155e-22
2427	2427	CA1	KLHL13	0.794674	1.57664e-21
2448	2448	CA1	HTR5A	0.637578	4.50966e-21
2455	2455	CA1	GPR63	0.919489	5.56113e-21
2464	2464	CA1	KLHL26	0.686685	7.40484e-21
2484	2484	CA1	CCDC71L	0.548646	1.13509e-20
2489	2489	CA1	NUDT18	0.622717	1.30135e-20
2492	2492	CA1	CHAC1	0.786497	1.34996e-20
2509	2509	CA1	ZNF503	0.557016	2.3606e-20
2514	2514	CA1	ZNF831	0.799005	3.13575e-20
2518	2518	CA1	DRD1	1.51904	3.51255e-20
2535	2535	CA1	ZFP69B	0.675861	5.26186e-20
2539	2539	CA1	APOO	0.595127	5.64447e-20
2563	2563	CA1	RTN4R	0.818008	8.56803e-20
2566	2566	CA1	GALM	0.824558	9.42587e-20
2568	2568	CA1	G0S2	0.591335	9.54938e-20
2590	2590	CA1	SMIM10L2A	0.561821	1.65369e-19
2614	2614	CA1	PABPC1L2A	0.520554	3.21456e-19
2618	2618	CA1	MID1	0.56281	3.82533e-19
2635	2635	CA1	CCDC24	0.593606	6.38689e-19
2645	2645	CA1	LRFN1	0.588702	7.64159e-19
2650	2650	CA1	CLIC6	2.39063	9.51559e-19
2679	2679	CA1	CCKBR	0.704187	2.65958e-18
2681	2681	CA1	ADAMTSL1	1.6844	2.87495e-18
2691	2691	CA1	MSANTD1	0.603759	4.33914e-18
2733	2733	CA1	SPIRE2	0.525841	1.17499e-17
2738	2738	CA1	PTPN3	0.587605	1.29606e-17
2752	2752	CA1	ANKRD63	1.67756	1.77456e-17
2770	2770	CA1	B3GNT4	0.880239	2.72575e-17
2773	2773	CA1	BTC	1.45907	3.00249e-17
2799	2799	CA1	EFCAB10	0.612592	5.74327e-17
2812	2812	CA1	PPARGC1B	0.554027	8.0247e-17
2828	2828	CA1	MPP3	0.558184	1.33925e-16
2837	2837	CA1	FAM78B	0.556805	1.80686e-16
2840	2840	CA1	DUSP2	1.23668	1.96188e-16
2843	2843	CA1	THUMPD2	0.501117	2.07967e-16
2846	2846	CA1	CENPVL3	0.791989	2.20587e-16
2870	2870	CA1	GPR61	0.649647	4.47875e-16
2889	2889	CA1	TG	0.927668	6.65269e-16
2893	2893	CA1	CATSPERZ	0.896558	7.14257e-16
2908	2908	CA1	MORN3	0.520192	1.0283e-15
2913	2913	CA1	ENTPD7	0.69821	1.10042e-15
2926	2926	CA1	TTC23L	0.899027	1.53552e-15
2971	2971	CA1	SH2D1B	2.1846	3.86158e-15
2985	2985	CA1	ANKRD30BL	0.715115	5.10992e-15
2989	2989	CA1	ACAP1	0.521265	5.76092e-15
2990	2990	CA1	CHML	0.611173	5.87258e-15
2991	2991	CA1	AC138647.1	1.58909	5.99757e-15
2998	2998	CA1	PTPN20	0.559293	7.0316e-15
3000	0	SR	NSMF	0.8781	0
3001	1	SR	FTL	0.716354	0
3002	2	SR	PLP1	1.08229	0
3003	3	SR	NCS1	0.831855	0
3004	4	SR	QKI	0.750384	0
3005	5	SR	GLUL	0.650745	0
3006	6	SR	NTRK2	0.602583	0
3007	7	SR	CRYAB	0.818608	0
3008	8	SR	NDRG2	0.650099	0
3009	9	SR	PTGDS	0.634931	0
3010	10	SR	CNP	0.907876	6.39837e-301
3011	11	SR	CST3	0.582043	2.84915e-296
3012	12	SR	DDN	1.05979	2.97896e-296
3013	13	SR	MBP	0.866013	2.18064e-289
3014	14	SR	MOG	1.10366	3.99073e-284
3015	15	SR	PPP1R9B	0.649543	4.36805e-277
3016	16	SR	EEF2	0.589556	1.05311e-262
3017	17	SR	APOD	0.754801	2.1336e-261
3018	18	SR	CBX6	0.774809	9.35915e-260
3019	19	SR	APOE	0.676373	8.77291e-258
3020	20	SR	PDZD4	0.659489	4.93011e-256
3021	21	SR	OPALIN	1.30303	7.85147e-245
3022	22	SR	S100B	0.651889	2.40749e-240
3023	23	SR	PALM	0.835211	8.26009e-237
3024	24	SR	GPRC5B	0.745661	5.14548e-236
3025	25	SR	MOBP	0.934266	3.50133e-233
3026	26	SR	SLC44A1	0.9216	9.91516e-228
3027	27	SR	MAN2A1	0.918186	1.00273e-223
3028	28	SR	IFITM3	0.721715	2.49585e-222
3029	29	SR	CLDND1	0.916714	2.71847e-211
3030	30	SR	JPH3	0.807202	2.04649e-196
3031	31	SR	SLC1A3	0.619204	1.06088e-190
3032	32	SR	PLAAT3	0.74222	2.30651e-190
3033	33	SR	SHANK1	0.919293	3.88133e-190
3034	34	SR	MT2A	0.641783	9.89159e-190
3035	35	SR	B2M	0.571933	1.23447e-187
3036	36	SR	HIPK2	0.753923	2.38762e-186
3037	37	SR	GSN	0.736279	1.10495e-185
3039	39	SR	SEPTIN4	0.828693	1.36472e-184
3040	40	SR	MAG	0.961415	9.2923e-184
3041	41	SR	LPAR1	1.00404	1.09913e-182
3042	42	SR	RNASE1	0.937708	1.75664e-180
3043	43	SR	SLAIN1	0.788759	2.42758e-180
3044	44	SR	TF	0.787608	1.91697e-179
3045	45	SR	ADIRF	0.801036	4.64445e-177
3046	46	SR	SPARCL1	0.580015	1.32382e-176
3047	47	SR	SELENOP	0.847621	9.01925e-175
3049	49	SR	GIT1	0.765786	6.97866e-174
3050	50	SR	AGAP2	0.564891	1.61198e-172
3051	51	SR	VIM	0.785544	2.9569e-170
3052	52	SR	ATP1A2	0.505897	9.24535e-170
3053	53	SR	PLEKHB1	0.643755	1.52251e-165
3054	54	SR	TMEM144	0.961138	4.53013e-165
3055	55	SR	SPP1	0.915105	9.23545e-164
3056	56	SR	IFITM2	0.758584	1.18788e-163
3057	57	SR	SCD	0.598445	5.45535e-163
3058	58	SR	RGCC	0.759782	2.29277e-157
3059	59	SR	AQP4	0.57981	2.83219e-157
3061	61	SR	QDPR	0.596672	5.16526e-155
3062	62	SR	FGF1	0.818533	1.16253e-153
3063	63	SR	FBXL16	0.779296	9.46137e-151
3064	64	SR	NPAS3	0.691337	3.01796e-150
3065	65	SR	HSPA2	0.828694	1.44126e-149
3067	67	SR	PON2	0.707922	6.09222e-149
3068	68	SR	AGT	0.64139	1.16545e-144
3069	69	SR	ETNPPL	0.742861	2.06888e-140
3070	70	SR	PACS2	0.650956	2.10517e-139
3071	71	SR	MAL	0.915192	6.96e-139
3072	72	SR	ZNF358	0.712721	1.35449e-138
3073	73	SR	ID4	0.743215	6.17358e-138
3074	74	SR	CLDN11	0.945379	2.21315e-137
3075	75	SR	SYNPO	0.743019	2.45398e-135
3076	76	SR	ENPP2	0.895938	6.98161e-135
3077	77	SR	IGFBP7	0.681148	7.70271e-135
3078	78	SR	SHC3	0.646603	3.36353e-133
3079	79	SR	CERCAM	0.905124	4.13781e-133
3080	80	SR	SLC6A1	0.6876	6.15005e-133
3082	82	SR	C1orf61	0.510193	3.42695e-132
3083	83	SR	CD9	0.807269	1.27903e-128
3084	84	SR	KCNN1	0.826266	1.51721e-128
3085	85	SR	HTRA1	0.566963	1.50728e-126
3086	86	SR	SEPTIN5	0.570994	2.10348e-124
3087	87	SR	CLIC4	0.712396	9.2685e-124
3088	88	SR	GNG7	0.646337	5.71255e-123
3089	89	SR	PIP4K2A	0.854433	1.27884e-122
3090	90	SR	ABCA2	0.533227	5.81927e-122
3091	91	SR	LAMP2	0.555949	1.00153e-121
3092	92	SR	MT1E	0.544547	3.49519e-121
3094	94	SR	S100A1	0.505043	4.36045e-120
3095	95	SR	PBXIP1	0.725319	6.22454e-120
3096	96	SR	TJP1	0.630237	1.0003e-117
3097	97	SR	SHANK3	0.792064	3.36148e-117
3098	98	SR	GFAP	0.648392	3.36339e-117
3099	99	SR	CD74	0.592103	1.6739e-115
3100	100	SR	TXNIP	0.77343	3.56768e-112
3101	101	SR	HEPACAM	0.672488	7.01122e-112
3102	102	SR	MYO10	0.809909	7.0454e-112
3103	103	SR	CNN3	0.597064	3.82223e-111
3104	104	SR	CABP7	0.85973	3.82223e-111
3105	105	SR	IL6ST	0.557507	4.0473e-111
3106	106	SR	ZCCHC24	0.721817	1.58576e-109
3107	107	SR	HLA-E	0.627428	4.61037e-108
3108	108	SR	DUSP8	0.854634	1.1433e-106
3109	109	SR	SOX10	0.947631	5.07694e-106
3110	110	SR	PLPP3	0.682528	6.64968e-106
3111	111	SR	CLDN5	0.690608	1.07972e-105
3112	112	SR	CXCL14	1.20705	1.11775e-105
3113	113	SR	ANXA5	0.722595	9.61968e-105
3114	114	SR	TMCC2	0.580178	1.7775e-104
3115	115	SR	PPP1R14A	0.796587	7.8605e-104
3116	116	SR	ERMN	0.927212	7.19084e-103
3119	119	SR	PTN	0.604377	1.98812e-102
3120	120	SR	HAPLN2	0.793128	5.41395e-101
3121	121	SR	NKX6-2	0.986546	3.47789e-100
3122	122	SR	DLGAP4	0.639594	4.01743e-100
3124	124	SR	MARCKSL1	0.553829	6.53103e-100
3125	125	SR	PLLP	0.814673	3.86149e-99
3126	126	SR	EVI2A	0.873288	1.04483e-98
3127	127	SR	GAB1	0.829011	1.14288e-98
3128	128	SR	MYRF	0.891802	1.44385e-98
3130	130	SR	RFTN2	0.814029	1.77997e-96
3131	131	SR	MT1X	0.596543	5.25975e-96
3132	132	SR	A2M	0.621536	1.63168e-95
3133	133	SR	FNBP1	0.631134	5.55827e-95
3135	135	SR	PHYHIPL	0.618304	3.61364e-94
3136	136	SR	SAMD14	0.924326	2.45539e-93
3137	137	SR	CNTN2	0.742555	9.65141e-93
3139	139	SR	SEPTIN7	0.631828	1.77317e-91
3140	140	SR	BCAS1	0.749848	7.97465e-91
3141	141	SR	LRP4	0.789612	8.62006e-91
3142	142	SR	BTBD2	0.692947	1.3244e-90
3143	143	SR	ATXN1	0.687034	1.8844e-90
3145	145	SR	MAP4K4	0.65793	7.2316e-90
3146	146	SR	TP53INP2	0.69745	5.53801e-89
3147	147	SR	DBNDD2	0.562015	7.26808e-88
3148	148	SR	MT1G	0.584488	1.94492e-87
3149	149	SR	SCARB2	0.547499	2.03592e-87
3150	150	SR	MT1F	0.629754	5.01201e-85
3151	151	SR	ALDH6A1	0.620955	8.10581e-84
3152	152	SR	GNAI2	0.501626	1.05443e-83
3155	155	SR	PAIP2B	0.638765	1.9032e-81
3156	156	SR	AQP1	0.645358	8.14944e-81
3158	158	SR	HCN2	0.830937	1.1476e-80
3159	159	SR	PITPNM3	0.995276	2.4179e-80
3161	161	SR	CBR1	0.505064	4.7283e-78
3162	162	SR	PLXNB3	0.875647	7.28801e-78
3163	163	SR	AIF1L	0.740633	9.54445e-78
3164	164	SR	PAQR6	0.511936	1.64131e-77
3165	165	SR	RHOBTB3	0.606143	1.84065e-77
3166	166	SR	PLEKHH1	0.758997	2.60717e-77
3167	167	SR	ZFP36L1	0.539784	2.6857e-77
3168	168	SR	ACSS1	0.684009	4.53578e-77
3169	169	SR	TTYH2	0.797982	6.02353e-77
3170	170	SR	PHLDB1	0.753149	7.39321e-77
3172	172	SR	ANP32B	0.600155	1.07255e-75
3173	173	SR	NF2	0.757806	1.81009e-75
3175	175	SR	FMNL2	0.549461	7.58834e-75
3176	176	SR	ADGRG1	0.671591	9.05651e-75
3177	177	SR	IGFBP5	0.503859	1.43935e-74
3178	178	SR	EFHD1	0.558843	2.74042e-74
3179	179	SR	TIMP3	0.551563	3.71646e-74
3181	181	SR	PHLPP1	0.730973	1.4579e-71
3182	182	SR	WASF2	0.604784	4.36626e-71
3183	183	SR	DLGAP3	0.915462	1.41519e-70
3185	185	SR	TPPP3	0.769995	4.63979e-70
3186	186	SR	ID3	0.679938	1.09676e-69
3187	187	SR	CA2	0.782559	4.65941e-69
3188	188	SR	ZDHHC9	0.789578	5.66804e-69
3189	189	SR	MTUS1	0.603561	7.09041e-69
3190	190	SR	S100A13	0.503353	8.43636e-69
3192	192	SR	PTTG1IP	0.576365	7.14033e-68
3194	194	SR	TMEM123	0.701021	1.36386e-67
3197	197	SR	KIF1C	0.548549	1.86297e-66
3200	200	SR	SLC16A1	0.658719	5.97829e-66
3201	201	SR	RHOU	0.711907	7.06796e-65
3204	204	SR	CNDP1	0.812694	3.05479e-64
3205	205	SR	SOWAHA	0.562536	5.04013e-64
3208	208	SR	MLLT6	0.636401	6.98132e-63
3210	210	SR	AHNAK	0.643732	9.77204e-63
3211	211	SR	MAP3K10	0.812479	2.30532e-62
3212	212	SR	PMP22	0.66397	2.33315e-62
3214	214	SR	CARNS1	0.725691	5.00907e-62
3217	217	SR	PCBP4	0.678557	1.17041e-61
3218	218	SR	CSNK1G2	0.563807	1.53384e-61
3219	219	SR	LIFR	0.528942	8.82076e-61
3222	222	SR	KAT2B	0.68271	1.74116e-60
3223	223	SR	TNS2	0.724912	2.17628e-60
3225	225	SR	GLTP	0.726586	5.95816e-60
3226	226	SR	SOX9	0.592144	8.61703e-60
3228	228	SR	HBA2	0.85993	6.95441e-59
3229	229	SR	GP1BB	0.569847	1.36563e-58
3230	230	SR	NFE2L2	0.571361	2.02616e-58
3232	232	SR	VWF	0.601359	5.03792e-58
3234	234	SR	DOC2B	0.661785	1.25577e-57
3235	235	SR	KCNJ10	0.544579	1.64092e-57
3238	238	SR	TNK2	0.552322	5.88722e-57
3239	239	SR	NUPR1	0.543181	2.45888e-56
3242	242	SR	CCDC85C	0.922084	2.38383e-55
3243	243	SR	ABCA8	0.865276	3.02724e-55
3244	244	SR	ANKRD40	0.597013	4.36047e-55
3245	245	SR	FAM102A	0.503132	4.36047e-55
3246	246	SR	TMBIM1	0.686729	1.2671e-54
3247	247	SR	ARRB1	0.600746	1.42124e-54
3248	248	SR	SGK1	0.529823	2.22601e-54
3252	252	SR	STOM	0.581884	4.79999e-54
3254	254	SR	APOC1	0.67223	3.59585e-53
3255	255	SR	DACT3	0.592077	3.7909e-53
3257	257	SR	C1QC	0.606899	4.71555e-53
3258	258	SR	PREX1	0.561569	7.49856e-53
3259	259	SR	HIF3A	0.613248	8.6221e-53
3260	260	SR	SEMA3B	0.701362	1.62605e-52
3263	263	SR	VWA1	0.756454	2.75052e-52
3266	266	SR	DAAM2	0.742509	5.17978e-52
3267	267	SR	METRN	0.689461	5.87744e-52
3269	269	SR	LITAF	0.714905	1.3686e-51
3270	270	SR	HDAC5	0.596996	1.51532e-51
3271	271	SR	RANBP3L	0.501882	3.51437e-51
3273	273	SR	CAPN2	0.512961	9.97322e-51
3275	275	SR	NFKBIA	0.541478	3.66096e-50
3277	277	SR	TGM2	0.644269	4.85413e-50
3280	280	SR	LAPTM5	0.549398	1.01733e-49
3283	283	SR	C3	0.564762	1.27555e-49
3285	285	SR	VEGFA	0.741668	1.88886e-49
3286	286	SR	BST2	0.648124	2.22026e-49
3287	287	SR	NTNG2	0.779266	2.32786e-49
3288	288	SR	DVL1	0.603191	3.84513e-49
3290	290	SR	MSI2	0.511664	5.11283e-49
3291	291	SR	RASSF4	0.587271	5.4918e-49
3293	293	SR	AGTPBP1	0.527085	7.02248e-49
3294	294	SR	RTKN	0.782594	1.44649e-48
3295	295	SR	SERPINB6	0.510986	2.10961e-48
3297	297	SR	CAPN3	0.728588	4.97849e-48
3300	300	SR	HOMER2	0.682929	2.16477e-47
3301	301	SR	RIMS4	0.776064	5.70401e-47
3302	302	SR	ITGB4	0.812126	6.32181e-47
3304	304	SR	FBXO41	0.503007	1.11948e-46
3307	307	SR	APCDD1	0.692504	2.56737e-46
3309	309	SR	GATAD2A	0.552924	1.83125e-45
3310	310	SR	MLC1	0.549943	1.99947e-45
3311	311	SR	FAM107B	0.608756	2.43863e-45
3314	314	SR	SLCO1A2	0.854259	5.22015e-45
3317	317	SR	SLC9A3R1	0.574184	7.30467e-45
3318	318	SR	DPYSL3	0.515968	9.24973e-45
3320	320	SR	NDRG1	0.607747	5.00014e-44
3321	321	SR	FGFR3	0.661491	6.36103e-44
3323	323	SR	DAB2IP	0.580488	7.25304e-44
3327	327	SR	RELN	1.60808	1.76971e-43
3328	328	SR	TMEM98	0.70463	5.7198e-43
3329	329	SR	CBFB	0.511715	6.44957e-43
3331	331	SR	REEP3	0.600328	1.10586e-42
3333	333	SR	VSIR	0.616749	2.22609e-42
3337	337	SR	WLS	0.67778	5.91618e-42
3340	340	SR	CTNNA1	0.553533	1.29939e-41
3341	341	SR	SKI	0.593597	1.4082e-41
3343	343	SR	RGS5	0.673	2.6957e-41
3345	345	SR	PLXNB1	0.690099	4.85576e-41
3347	347	SR	CENPB	0.546293	1.72271e-40
3348	348	SR	FOXO4	0.627862	2.54385e-40
3349	349	SR	ZFP36L2	0.580753	2.68039e-40
3352	352	SR	SLC14A1	0.765581	4.43169e-40
3353	353	SR	C1QB	0.527201	4.76045e-40
3354	354	SR	SLCO2B1	0.597561	5.7676e-40
3355	355	SR	KLK6	0.677475	6.6701e-40
3356	356	SR	DENND5A	0.526843	7.35344e-40
3357	357	SR	FA2H	0.785318	7.7169e-40
3358	358	SR	PXK	0.558675	8.15787e-40
3359	359	SR	PSEN1	0.56549	1.03313e-39
3372	372	SR	LRIG1	0.56733	9.63992e-38
3375	375	SR	TRAF3	0.578404	1.19104e-37
3376	376	SR	OAF	0.894425	1.2099e-37
3377	377	SR	RAPGEF3	0.710636	1.84333e-37
3378	378	SR	PODXL	0.563029	1.94296e-37
3379	379	SR	CERS2	0.526958	4.10143e-37
3380	380	SR	FAM189A1	0.653928	5.1077e-37
3384	384	SR	LRP3	0.722653	9.51347e-37
3385	385	SR	BAG3	0.56058	1.27069e-36
3386	386	SR	BOK	0.675849	1.84909e-36
3387	387	SR	MAPK4	0.582129	2.18306e-36
3388	388	SR	PITPNM1	0.686061	2.28537e-36
3390	390	SR	CDK19	0.65373	3.30122e-36
3391	391	SR	COL4A5	0.692931	3.44226e-36
3394	394	SR	EGLN3	0.836252	3.7518e-36
3397	397	SR	ITGB1	0.534042	7.74577e-36
3399	399	SR	KCNN3	0.602756	8.67424e-36
3403	403	SR	RGS12	0.636294	2.76689e-35
3406	406	SR	STON2	0.517115	1.05287e-34
3411	411	SR	NCKAP5	0.644126	2.68191e-34
3413	413	SR	CTNNA3	0.728017	8.25241e-34
3414	414	SR	VAMP3	0.524601	1.10515e-33
3416	416	SR	CDK18	0.512205	1.46513e-33
3418	418	SR	FERMT2	0.623525	1.78997e-33
3420	420	SR	ANGPTL4	0.658343	7.41638e-33
3422	422	SR	RNF220	0.696605	7.73434e-33
3430	430	SR	FCGRT	0.539427	3.12545e-32
3433	433	SR	SEMA6A	0.6648	1.05056e-31
3434	434	SR	SYNGR2	0.636324	1.05237e-31
3435	435	SR	MLLT1	0.555301	1.3423e-31
3437	437	SR	AJM1	0.54896	2.04134e-31
3440	440	SR	SOX2	0.597771	4.34745e-31
3441	441	SR	F3	0.588102	4.78799e-31
3442	442	SR	ASPA	0.764676	6.86334e-31
3446	446	SR	USP54	0.584308	3.01975e-30
3447	447	SR	POU3F3	0.62209	3.11762e-30
3448	448	SR	AMOT	0.581837	3.30814e-30
3449	449	SR	OTUD7B	0.622172	3.54499e-30
3451	451	SR	RAB13	0.57944	4.67364e-30
3454	454	SR	FAM181B	0.71441	1.45384e-29
3456	456	SR	WWOX	0.55409	4.46994e-29
3457	457	SR	FGFR2	0.668437	4.91359e-29
3460	460	SR	CFH	0.742961	8.91865e-29
3467	467	SR	RELL1	0.547415	1.79608e-28
3470	470	SR	SLC31A2	0.750603	2.83269e-28
3472	472	SR	ZNF219	0.714648	4.41084e-28
3478	478	SR	DHRS3	0.670833	2.08255e-27
3479	479	SR	LIX1	0.831111	2.76843e-27
3482	482	SR	ITPR2	0.807548	1.21165e-26
3483	483	SR	TRIM59	0.912044	1.3724e-26
3487	487	SR	ADARB2	0.776386	2.14066e-26
3489	489	SR	CDC42EP1	0.718304	3.34142e-26
3490	490	SR	LAMB2	0.532426	3.35644e-26
3492	492	SR	DOCK1	0.559579	3.68382e-26
3493	493	SR	ERBB3	0.769443	3.70015e-26
3494	494	SR	ABCG1	0.635746	4.10638e-26
3495	495	SR	PREX2	0.525911	4.37833e-26
3497	497	SR	EPAS1	0.510433	6.71182e-26
3501	501	SR	TNS1	0.523618	1.06542e-25
3502	502	SR	CAVIN1	0.560255	1.12113e-25
3505	505	SR	LRP10	0.53753	1.36303e-25
3506	506	SR	ALDH1L1	0.631598	1.36832e-25
3508	508	SR	GASK1B	0.638335	1.91272e-25
3510	510	SR	HIP1	0.664474	2.56955e-25
3511	511	SR	REXO1	0.602814	3.30701e-25
3514	514	SR	MOB3B	0.63535	4.23104e-25
3516	516	SR	MCAM	0.607127	5.16015e-25
3517	517	SR	PDE1C	0.58794	6.55353e-25
3519	519	SR	VSIG4	0.606132	9.09124e-25
3521	521	SR	SERINC5	0.583175	1.25311e-24
3522	522	SR	CDC42EP4	0.557976	1.33747e-24
3527	527	SR	COL16A1	0.563196	2.29874e-24
3528	528	SR	CAT	0.674427	2.4395e-24
3529	529	SR	TMEM63A	0.500912	2.567e-24
3530	530	SR	SCARA3	0.848651	2.59773e-24
3532	532	SR	SORBS3	0.708868	3.19308e-24
3537	537	SR	TMEM88B	0.845168	4.55425e-24
3538	538	SR	MYO15B	0.627352	6.87985e-24
3540	540	SR	PCDH10	0.637036	9.63667e-24
3544	544	SR	HHIP	0.696731	1.1463e-23
3547	547	SR	ATOH8	0.82608	1.85695e-23
3552	552	SR	PANX2	0.580256	3.90253e-23
3553	553	SR	RASSF2	0.593164	4.4749e-23
3554	554	SR	TLN1	0.501947	5.74698e-23
3555	555	SR	S100A16	0.61252	7.62504e-23
3557	557	SR	CAPG	0.606146	9.77335e-23
3558	558	SR	BAP1	0.541407	1.07586e-22
3562	562	SR	SEPTIN10	0.591514	1.31459e-22
3563	563	SR	NEK7	0.556055	1.61805e-22
3565	565	SR	NKAIN4	0.636106	1.77779e-22
3567	567	SR	ABCA1	0.848088	2.4703e-22
3576	576	SR	TAX1BP3	0.532285	5.01943e-22
3577	577	SR	SAMD4B	0.504544	5.84729e-22
3578	578	SR	NACC2	0.59945	6.00546e-22
3580	580	SR	NPC1	0.541224	8.74262e-22
3581	581	SR	CD82	0.55462	8.84106e-22
3582	582	SR	MBD3	0.726161	1.00582e-21
3584	584	SR	PLPP2	0.702929	1.15734e-21
3586	586	SR	GNA13	0.543084	1.53283e-21
3591	591	SR	SLC27A1	0.515867	2.16797e-21
3592	592	SR	CDH5	0.594579	2.2943e-21
3595	595	SR	WIPF1	0.631491	2.38626e-21
3596	596	SR	ELOVL1	0.555322	2.44532e-21
3599	599	SR	PLAAT4	0.57332	2.68929e-21
3607	607	SR	MRVI1	0.543762	6.5777e-21
3609	609	SR	SBK1	0.751503	7.56054e-21
3610	610	SR	MTMR10	0.596477	8.46156e-21
3618	618	SR	CARD8	0.602082	3.12103e-20
3620	620	SR	PDGFRB	0.611573	6.37624e-20
3621	621	SR	DIP2B	0.534887	7.0427e-20
3628	628	SR	CREB5	0.887916	1.67913e-19
3632	632	SR	FCHSD2	0.546478	2.13443e-19
3636	636	SR	CYP27A1	0.652628	2.68232e-19
3641	641	SR	CDH20	0.623264	4.40134e-19
3642	642	SR	DEPP1	0.534168	4.68498e-19
3646	646	SR	CTDSP1	0.642081	5.45805e-19
3651	651	SR	LGALS3	0.66714	7.23712e-19
3654	654	SR	MAP3K11	0.658318	8.1727e-19
3657	657	SR	KREMEN1	0.637807	1.02318e-18
3663	663	SR	MFGE8	0.509702	1.70894e-18
3668	668	SR	GAB2	0.543429	2.78811e-18
3669	669	SR	FAXDC2	0.574928	2.99565e-18
3674	674	SR	SYTL4	0.718313	5.0218e-18
3679	679	SR	GJB1	0.857138	7.51171e-18
3680	680	SR	GNG11	0.641756	9.12423e-18
3681	681	SR	PRR18	0.768092	1.07529e-17
3684	684	SR	PPP2R5A	0.544824	1.2705e-17
3685	685	SR	ANKRD9	0.573989	1.49232e-17
3691	691	SR	VAMP5	0.579431	2.42181e-17
3692	692	SR	TMEM235	0.858622	2.46721e-17
3694	694	SR	LRRC32	0.786749	4.572e-17
3697	697	SR	FANCL	0.534861	5.10851e-17
3699	699	SR	CMTM5	0.708702	5.40719e-17
3700	700	SR	FGFRL1	0.607813	6.75923e-17
3702	702	SR	KLF15	0.588271	7.85507e-17
3703	703	SR	CALB2	1.12968	8.5091e-17
3707	707	SR	ARAP2	0.534433	1.0147e-16
3715	715	SR	CPM	0.700975	2.18776e-16
3723	723	SR	IFITM1	0.548656	6.24022e-16
3724	724	SR	NKD1	0.715536	7.40916e-16
3726	726	SR	SCAMP2	0.508959	8.34941e-16
3727	727	SR	CHD7	0.730467	9.01666e-16
3735	735	SR	TNC	0.683935	1.5785e-15
3736	736	SR	VEGFB	0.556744	2.03138e-15
3737	737	SR	TMEM125	0.940283	2.28259e-15
3742	742	SR	DIPK1C	0.766611	2.94604e-15
3744	744	SR	ZNF644	0.51596	3.03286e-15
3753	753	SR	NIPAL3	0.583021	6.73893e-15
3762	762	SR	TRIP6	0.619618	1.1347e-14
3763	763	SR	CYP2J2	0.771097	1.14447e-14
3765	765	SR	FBRSL1	0.734448	1.28256e-14
3766	766	SR	PDK4	0.670346	1.30152e-14
3767	767	SR	SFRP2	0.791427	1.37466e-14
3770	770	SR	FGF2	0.519153	2.0601e-14
3772	772	SR	IL13RA1	0.55417	2.46155e-14
3775	775	SR	ANXA1	0.526748	3.41776e-14
3781	781	SR	TSC22D4	0.652735	5.8024e-14
3785	785	SR	MT1H	0.924575	6.22983e-14
3786	786	SR	DOCK5	0.62008	6.33935e-14
3788	788	SR	KANK1	0.684907	7.04119e-14
3791	791	SR	TMIGD3	0.585785	7.35747e-14
3800	800	SR	SLC12A7	0.767887	1.20318e-13
3802	802	SR	BEGAIN	0.526886	1.25558e-13
3804	804	SR	PLEKHG3	0.529643	1.36137e-13
3805	805	SR	CASTOR2	0.5606	1.36137e-13
3806	806	SR	PLCD3	0.607944	1.53461e-13
3808	808	SR	KIAA1755	0.669101	1.70237e-13
3814	814	SR	HIGD1B	0.522346	2.40304e-13
3815	815	SR	SLC39A12	0.599037	2.45325e-13
3819	819	SR	SEPTIN9	0.502255	2.7796e-13
3824	824	SR	NINJ1	0.577946	3.6678e-13
3825	825	SR	CP	0.570767	4.09919e-13
3826	826	SR	ZNF536	0.753983	4.50036e-13
3828	828	SR	GPSM2	0.595045	4.59885e-13
3832	832	SR	TSPO	0.506642	6.26275e-13
3837	837	SR	MPST	0.569472	8.86583e-13
3839	839	SR	CHADL	0.617571	9.57025e-13
3845	845	SR	ARHGEF1	0.503496	1.20613e-12
3854	854	SR	GGT5	0.580528	1.37555e-12
3857	857	SR	B4GALT2	0.500289	1.46883e-12
3859	859	SR	MAGT1	0.524977	1.86578e-12
3860	860	SR	GREM1	1.29076	1.87274e-12
3861	861	SR	ADAMTS4	0.681625	1.88216e-12
3863	863	SR	RGS3	0.553678	2.00943e-12
3865	865	SR	GABPB2	0.626426	2.11551e-12
3873	873	SR	ERBB4	0.647422	3.61568e-12
3874	874	SR	MYBPC1	0.565248	3.73795e-12
3875	875	SR	EHBP1L1	0.602494	3.83134e-12
3880	880	SR	NPL	0.591085	4.44741e-12
3884	884	SR	HCLS1	0.55009	7.0393e-12
3891	891	SR	DENND4B	0.542307	8.33828e-12
3895	895	SR	SLC16A9	0.65163	8.69808e-12
3897	897	SR	S1PR1	0.501709	9.23451e-12
3899	899	SR	RENBP	0.651161	9.82422e-12
3901	901	SR	FRMD4B	0.655301	1.08338e-11
3903	903	SR	IL17D	0.512213	1.2934e-11
3905	905	SR	PRELP	0.563211	1.41082e-11
3909	909	SR	ATG4C	0.552213	2.14066e-11
3911	911	SR	TMEM176B	0.51285	2.44427e-11
3912	912	SR	CD34	0.703032	2.46528e-11
3914	914	SR	CD22	0.721107	2.68594e-11
3916	916	SR	EMID1	0.650799	2.72673e-11
3920	920	SR	GPR37	0.670909	3.45167e-11
3923	923	SR	SHROOM4	0.746724	3.63823e-11
3930	930	SR	KCTD15	0.617472	4.85732e-11
3936	936	SR	EHD2	0.564158	5.57695e-11
3943	943	SR	CASKIN2	0.661718	1.00796e-10
3953	953	SR	EFNA1	0.541299	1.92228e-10
3954	954	SR	WDR49	0.545273	2.18811e-10
3955	955	SR	HBA1	0.745872	2.23652e-10
3962	962	SR	DEPTOR	0.6049	2.84992e-10
3966	966	SR	HMG20B	0.548855	3.68362e-10
3970	970	SR	MEGF10	0.652105	4.48139e-10
3972	972	SR	PLIN2	0.62884	4.94892e-10
3973	973	SR	RHOG	0.541685	5.46163e-10
3984	984	SR	TCF7L2	0.529842	9.65504e-10
3985	985	SR	ROBO3	0.637958	9.85987e-10
3988	988	SR	ARL4C	0.666385	1.06492e-09
3991	991	SR	ECHDC2	0.508658	1.17891e-09
3993	993	SR	SHISAL1	0.639092	1.31897e-09
3994	994	SR	FRMD5	0.707878	1.42999e-09
3995	995	SR	TMTC2	0.769012	1.48827e-09
3997	997	SR	LDLRAD3	0.643416	1.6238e-09
3998	998	SR	TGFB3	0.551767	1.7988e-09
4000	1000	SR	CAVIN2	0.541328	2.01916e-09
4005	1005	SR	SLC2A5	0.581533	2.2002e-09
4006	1006	SR	GNG12	0.53754	2.26694e-09
4007	1007	SR	MS4A7	0.651911	2.43234e-09
4008	1008	SR	NEK3	0.650181	2.47767e-09
4010	1010	SR	NECAP2	0.562661	2.49683e-09
4011	1011	SR	FAM189A2	0.616805	2.54052e-09
4014	1014	SR	BMPER	0.686316	2.59686e-09
4019	1019	SR	SOX8	0.611875	2.93336e-09
4020	1020	SR	ACACB	0.621196	3.09224e-09
4022	1022	SR	GPER1	0.677091	3.1335e-09
4024	1024	SR	CDKN1A	0.55097	3.23641e-09
4026	1026	SR	YAP1	0.590015	3.60546e-09
4028	1028	SR	FAS	0.840761	3.65694e-09
4033	1033	SR	TMEM176A	0.554369	4.10345e-09
4036	1036	SR	TP53BP2	0.574738	4.64814e-09
4040	1040	SR	HSDL2	0.523791	4.76294e-09
4041	1041	SR	CLCA4	1.00982	5.57742e-09
4043	1043	SR	TGFBR2	0.538997	5.64992e-09
4046	1046	SR	GAN	0.517265	6.62352e-09
4052	1052	SR	HEG1	0.636916	7.33364e-09
4053	1053	SR	HES4	0.574513	7.45901e-09
4057	1057	SR	ZC3H7B	0.519386	9.03526e-09
4067	1067	SR	ZNF853	0.617137	1.22745e-08
4069	1069	SR	XAF1	0.537115	1.23701e-08
4076	1076	SR	MERTK	0.531799	1.60349e-08
4087	1087	SR	ZNRF3	0.615844	2.32097e-08
4088	1088	SR	SLC52A3	0.738152	2.46366e-08
4093	1093	SR	IL4R	0.607881	2.76353e-08
4094	1094	SR	SDS	1.13447	2.80227e-08
4099	1099	SR	PDE7B	0.528486	3.16765e-08
4101	1101	SR	TBC1D16	0.6094	3.44579e-08
4102	1102	SR	SELL	0.828049	3.87606e-08
4103	1103	SR	RASGRP3	0.6858	3.89679e-08
4109	1109	SR	SLC4A2	0.651579	4.64491e-08
4112	1112	SR	IL32	0.562256	4.91453e-08
4117	1117	SR	ARHGEF40	0.54179	5.47969e-08
4125	1125	SR	ABTB2	0.926701	6.40037e-08
4136	1136	SR	SH3D19	0.637811	7.65712e-08
4149	1149	SR	TYMS	1.11972	9.86678e-08
4150	1150	SR	LGI4	0.502222	1.02441e-07
4151	1151	SR	GAD2	0.732695	1.02584e-07
4154	1154	SR	PDLIM3	0.677072	1.0698e-07
4160	1160	SR	SCIN	0.521011	1.46791e-07
4162	1162	SR	PCP4L1	0.749254	1.4934e-07
4163	1163	SR	MS4A6A	0.503191	1.50606e-07
4170	1170	SR	ALDH1A1	0.576663	1.84375e-07
4175	1175	SR	RRAS	0.532007	2.10048e-07
4176	1176	SR	TINAGL1	0.567606	2.12654e-07
4188	1188	SR	RNF213	0.516364	3.00549e-07
4190	1190	SR	ATP10A	0.680882	3.28352e-07
4200	1200	SR	PHKG1	0.588449	4.55231e-07
4218	1218	SR	SRGAP1	0.534584	6.99545e-07
4224	1224	SR	SIPA1	0.506191	7.47155e-07
4226	1226	SR	THNSL2	0.517096	7.76019e-07
4229	1229	SR	CDC42EP2	0.63852	8.26198e-07
4231	1231	SR	AGRN	0.539869	8.5003e-07
4233	1233	SR	SEMA6D	0.571384	8.62878e-07
4235	1235	SR	PLIN1	0.769429	8.75732e-07
4244	1244	SR	ITIH5	0.642294	1.01004e-06
4251	1251	SR	EMP2	0.619774	1.21253e-06
4256	1256	SR	ADAMTS9	0.713194	1.33508e-06
4261	1261	SR	ADGRF5	0.516727	1.5123e-06
4263	1263	SR	LTBP1	0.510176	1.6109e-06
4264	1264	SR	MYOT	0.627141	1.61838e-06
4265	1265	SR	CARHSP1	0.524139	1.64831e-06
4266	1266	SR	GOLIM4	0.56139	1.73779e-06
4268	1268	SR	SLC38A3	0.509539	1.80854e-06
4269	1269	SR	NIBAN2	0.531787	1.83386e-06
4275	1275	SR	ACSBG1	0.636523	2.02065e-06
4287	1287	SR	PACSIN3	0.564096	2.38203e-06
4289	1289	SR	ADCY5	0.514428	2.49229e-06
4290	1290	SR	ELF1	0.592362	2.5365e-06
4298	1298	SR	WTIP	0.758648	3.02306e-06
4302	1302	SR	HEY2	0.62205	3.24776e-06
4304	1304	SR	ITGAX	0.63909	3.40667e-06
4305	1305	SR	PAPSS2	0.569406	3.40718e-06
4306	1306	SR	CLEC2B	0.504415	3.4149e-06
4307	1307	SR	RHBDL2	0.714015	3.47056e-06
4310	1310	SR	CDH19	0.542213	3.67169e-06
4319	1319	SR	ALDH4A1	0.505833	4.63375e-06
4323	1323	SR	IL1R1	0.639248	5.13142e-06
4328	1328	SR	UAP1L1	0.627958	5.55441e-06
4329	1329	SR	FLI1	0.516312	5.61015e-06
4339	1339	SR	TBXAS1	0.553873	7.31887e-06
4341	1341	SR	SLC15A2	0.505302	7.48802e-06
4342	1342	SR	PSAT1	0.548998	7.52513e-06
4345	1345	SR	PDE8A	0.516833	7.86028e-06
4347	1347	SR	PARP4	0.515068	8.01433e-06
4351	1351	SR	ANXA3	0.564688	9.08916e-06
4363	1363	SR	PSMB9	0.653477	1.13632e-05
4364	1364	SR	CKMT2	0.728987	1.16514e-05
4366	1366	SR	C10orf90	0.670039	1.19517e-05
4372	1372	SR	SH3BP2	0.616374	1.26942e-05
4378	1378	SR	SYNE3	0.797331	1.40456e-05
4382	1382	SR	TCEA3	0.531707	1.48395e-05
4389	1389	SR	ACSS3	0.521221	1.57058e-05
4398	1398	SR	MMP28	0.566314	1.71904e-05
4400	1400	SR	KANK3	0.739056	1.77515e-05
4417	1417	SR	THBS4	0.544231	2.22077e-05
4418	1418	SR	PAMR1	0.641172	2.23319e-05
4425	1425	SR	TLR4	0.714889	2.47906e-05
4427	1427	SR	SLC11A1	0.57033	2.53207e-05
4429	1429	SR	PRKD3	0.568879	2.57425e-05
4435	1435	SR	ACSL5	0.533949	2.97337e-05
4441	1441	SR	FXYD5	0.504607	3.32883e-05
4444	1444	SR	EBF4	0.515919	3.41316e-05
4445	1445	SR	RHBDF2	0.500112	3.50501e-05
4447	1447	SR	NTSR2	0.634195	3.60824e-05
4452	1452	SR	SUCLG2	0.53031	3.8902e-05
4453	1453	SR	ERBB2	0.838422	3.96216e-05
4459	1459	SR	VRK2	0.605662	4.36256e-05
4460	1460	SR	MYC	0.62283	4.38537e-05
4467	1467	SR	RASSF8	0.536197	4.60101e-05
4468	1468	SR	SERPINE1	0.621526	4.66291e-05
4472	1472	SR	PI16	0.567936	4.8215e-05
4473	1473	SR	RORB	0.612748	4.92913e-05
4478	1478	SR	PAPLN	0.726567	5.26678e-05
4480	1480	SR	CASTOR1	0.553881	5.65437e-05
4483	1483	SR	ADM	0.584676	5.78569e-05
4484	1484	SR	HLA-DRB1	0.524032	5.83974e-05
4489	1489	SR	PARP14	0.616298	6.14695e-05
4507	1507	SR	ARHGEF37	0.518066	7.43341e-05
4510	1510	SR	MEX3D	0.615266	7.63592e-05
4512	1512	SR	CPLX3	1.23446	7.77039e-05
4517	1517	SR	PLCE1	0.557876	8.25665e-05
4524	1524	SR	PRX	0.902432	8.77178e-05
4525	1525	SR	RUNX1	0.764499	8.85374e-05
4527	1527	SR	LSR	0.530039	9.00331e-05
4528	1528	SR	RNF144B	0.605447	9.00337e-05
4530	1530	SR	AKNA	0.595474	9.14198e-05
4533	1533	SR	LAMA2	0.609022	9.22103e-05
4534	1534	SR	GPR153	0.939224	9.2283e-05
4544	1544	SR	IRAK3	0.638862	0.000106832
4549	1549	SR	PIEZO1	0.555178	0.000114559
4555	1555	SR	IL33	0.611974	0.000123564
4557	1557	SR	KCNH8	0.599102	0.000126258
4558	1558	SR	SHB	0.689747	0.000131412
4561	1561	SR	FGR	0.611226	0.000136716
4564	1564	SR	ACVRL1	0.500959	0.000140463
4569	1569	SR	FBXL7	0.630415	0.000143597
4571	1571	SR	A4GALT	0.624466	0.000146003
4576	1576	SR	COBLL1	0.548373	0.0001514
4588	1588	SR	NINJ2	0.591797	0.00017227
4589	1589	SR	TNS3	0.537211	0.00017297
4592	1592	SR	TMC7	0.624966	0.000175414
4593	1593	SR	USH1C	0.595271	0.000176216
4596	1596	SR	CHST3	0.589247	0.00017986
4601	1601	SR	CRLF1	0.826767	0.000198499
4602	1602	SR	MYOF	0.668456	0.000198622
4610	1610	SR	SRARP	0.616246	0.000220184
4614	1614	SR	SFRP1	0.744862	0.000229787
4618	1618	SR	VIP	0.792173	0.000233
4622	1622	SR	SHROOM1	0.593913	0.000238721
4625	1625	SR	NAGA	0.571689	0.000254116
4631	1631	SR	PRR5L	0.654017	0.000276506
4632	1632	SR	FAM167A	0.528349	0.000276801
4634	1634	SR	FSTL5	0.747656	0.000279167
4636	1636	SR	RFX4	0.51407	0.000284569
4637	1637	SR	ADAM33	0.943468	0.000288512
4646	1646	SR	NEDD9	0.575717	0.000304333
4648	1648	SR	C2orf68	0.550814	0.000310327
4649	1649	SR	NOTCH4	0.557011	0.000310816
4650	1650	SR	RXRG	0.754656	0.000316662
4654	1654	SR	ENOSF1	0.659445	0.000342371
4659	1659	SR	FYB1	0.503288	0.00036449
4665	1665	SR	MCM5	0.557209	0.000375837
4666	1666	SR	LPAR6	0.607704	0.0003806
4667	1667	SR	NHLRC2	0.578798	0.000383335
4668	1668	SR	C1orf162	0.509829	0.000383927
4669	1669	SR	MYO1D	0.550064	0.000389729
4670	1670	SR	CPS1	1.00805	0.000391709
4672	1672	SR	FAM222A	0.759136	0.00041108
4674	1674	SR	LOXL3	0.748782	0.000418269
4676	1676	SR	ZFHX3	0.539273	0.00042358
4684	1684	SR	SWT1	0.517301	0.000480336
4688	1688	SR	AAMDC	0.502384	0.00049507
4691	1691	SR	OLIG2	0.616125	0.000508848
4698	1698	SR	CNKSR3	0.71541	0.000533063
4701	1701	SR	SLC25A18	0.527032	0.000551999
4704	1704	SR	MYLIP	0.534436	0.000556629
4707	1707	SR	RHOJ	0.550044	0.000562709
4710	1710	SR	ICK	0.569674	0.000592595
4713	1713	SR	STAB1	0.561215	0.000602972
4716	1716	SR	RBMS3	0.566057	0.00062586
4719	1719	SR	PYGM	0.657499	0.000637818
4721	1721	SR	CFI	0.823357	0.000651859
4728	1728	SR	CNTNAP4	0.512226	0.000687459
4736	1736	SR	RGL3	0.814085	0.000726725
4740	1740	SR	CIITA	0.564472	0.000741062
4741	1741	SR	NDNF	1.35226	0.000753848
4743	1743	SR	TIE1	0.600653	0.000765832
4746	1746	SR	PLA1A	0.6213	0.000774653
4750	1750	SR	TNFRSF11A	0.804734	0.000813448
4752	1752	SR	INPP5D	0.518077	0.000829513
4757	1757	SR	TRIP10	0.587216	0.000864844
4761	1761	SR	NKX2-2	0.613168	0.00090391
4770	1770	SR	ADGRL4	0.57232	0.000984105
4779	1779	SR	GSTM1	0.516643	0.00110915
4781	1781	SR	NR2E1	0.743275	0.00111992
4784	1784	SR	GXYLT2	0.686989	0.00114163
4787	1787	SR	RHBDF1	0.598635	0.00117788
4800	1800	SR	SLC45A3	0.66222	0.00133772
4802	1802	SR	NWD1	0.588797	0.00137256
4804	1804	SR	SNX33	0.580831	0.00139668
4809	1809	SR	UGT8	0.713142	0.00143999
4810	1810	SR	SOHLH1	0.576311	0.00144287
4816	1816	SR	RNASE4	0.534161	0.00151593
4819	1819	SR	CLEC7A	0.580953	0.00154486
4820	1820	SR	KIF6	0.682	0.00159109
4823	1823	SR	SPSB1	0.50343	0.0016639
4825	1825	SR	RGR	0.580278	0.00174823
4827	1827	SR	PTH1R	0.585324	0.00179765
4828	1828	SR	TCIRG1	0.586695	0.00181401
4829	1829	SR	LCP1	0.529161	0.00184816
4830	1830	SR	C10orf105	0.695671	0.00186057
4832	1832	SR	TTC23	0.583941	0.00187084
4838	1838	SR	CSPG4	0.523095	0.00195558
4841	1841	SR	LPIN3	0.861958	0.00203968
4842	1842	SR	DIPK2B	0.506038	0.00205934
4848	1848	SR	LYN	0.634516	0.00211867
4855	1855	SR	PLAT	0.605001	0.00220932
4859	1859	SR	PLCG2	0.682078	0.00229967
4860	1860	SR	PHF21B	0.731958	0.00230123
4864	1864	SR	LSP1	0.594549	0.00236836
4868	1868	SR	DOCK8	0.583856	0.00248609
4870	1870	SR	TNFRSF1B	0.505838	0.00256025
4872	1872	SR	MEIS2	0.53131	0.00258018
4877	1877	SR	PRIMA1	0.61987	0.00265303
4879	1879	SR	TFEC	0.678195	0.00265603
4883	1883	SR	NOS3	0.541099	0.00276559
4885	1885	SR	GIMAP1	0.56841	0.00277805
4888	1888	SR	COL11A1	0.589824	0.00283343
4899	1899	SR	TUBB6	0.519815	0.00315704
4901	1901	SR	FAT1	0.516268	0.00317562
4902	1902	SR	ATP6V1FNB	0.810502	0.00317669
4903	1903	SR	GPAM	0.507883	0.00327205
4910	1910	SR	SFR1	0.573329	0.00350457
4913	1913	SR	EPS8L2	0.610604	0.00364253
4914	1914	SR	TRPM4	0.572782	0.0036829
4919	1919	SR	ADGRD1	0.909805	0.00393426
4920	1920	SR	RCAN3	0.626035	0.00394146
4925	1925	SR	DLL1	0.520605	0.00402311
4953	1953	SR	EPOR	0.503771	0.00477212
4959	1959	SR	TRIM56	0.538364	0.0050737
4963	1963	SR	FCGR1A	0.523517	0.00534385
4964	1964	SR	TTC38	0.527657	0.00534461
4968	1968	SR	IKZF2	0.538139	0.00560752
4974	1974	SR	SH3TC2	0.51129	0.0057993
4981	1981	SR	UBE2Q2	0.501624	0.00596002
4982	1982	SR	MAP3K6	0.556278	0.00604906
4983	1983	SR	NFKB2	0.537358	0.00605271
4986	1986	SR	ITPR3	0.676041	0.00624459
4992	1992	SR	TMEM140	0.587095	0.00651571
4996	1996	SR	HIVEP1	0.747211	0.00661377
4999	1999	SR	SQOR	0.506612	0.0069555
5000	2000	SR	LPAR5	0.629807	0.00697241
5001	2001	SR	LEF1	0.505271	0.00704475
5009	2009	SR	PLIN5	0.521578	0.00733785
5017	2017	SR	FES	0.624647	0.00751678
5022	2022	SR	NFATC4	0.502215	0.0076327
5029	2029	SR	CCDC14	0.532247	0.00784772
5030	2030	SR	SLC6A12	0.739567	0.00786426
5034	2034	SR	DUSP10	0.863824	0.00801862
5037	2037	SR	HLA-DRB5	0.526578	0.00818598
5039	2039	SR	PPARA	0.527578	0.00841204
5046	2046	SR	AASS	0.535092	0.00880955
5048	2048	SR	ITGA5	0.518441	0.00893775
5059	2059	SR	GPSM3	0.548349	0.00976224
5064	2064	SR	REST	0.703331	0.0101348
5065	2065	SR	LCNL1	0.505407	0.0101694
5068	2068	SR	ARHGAP9	0.526312	0.0104043
5069	2069	SR	OSMR	0.518714	0.0105439
5072	2072	SR	CPLANE2	0.568537	0.0108877
5074	2074	SR	ATP10B	0.67306	0.0109573
5075	2075	SR	APOL1	0.558871	0.0110829
5077	2077	SR	TRAF1	0.66791	0.0111589
5078	2078	SR	CRH	0.924948	0.0111597
5087	2087	SR	PLA2G5	0.778869	0.0114594
5090	2090	SR	CDCA7L	0.763275	0.0118378
5092	2092	SR	OMD	0.559502	0.0118824
5098	2098	SR	SAP25	0.577673	0.012227
5103	2103	SR	PLD5	0.691288	0.0127705
5104	2104	SR	COL5A3	0.824224	0.0129013
5115	2115	SR	ZNF217	0.523597	0.0139578
5116	2116	SR	MAP3K8	0.689954	0.0140204
5129	2129	SR	CSF3R	0.517944	0.0153526
5131	2131	SR	LDHD	0.558018	0.0156464
5132	2132	SR	RNPEPL1	0.528229	0.0156703
5134	2134	SR	NECTIN2	0.55933	0.0156824
5135	2135	SR	EFEMP2	0.632462	0.0157819
5143	2143	SR	GSTZ1	0.563393	0.0164695
5145	2145	SR	FRMPD3	0.682713	0.016664
5168	2168	SR	PHKA1	0.595613	0.0194222
5173	2173	SR	SULT1C4	0.637676	0.0202565
5177	2177	SR	MXRA8	0.63711	0.0209842
5183	2183	SR	ATG16L2	0.528168	0.0217676
5186	2186	SR	EYA2	0.607659	0.0218927
5187	2187	SR	HR	0.655361	0.021979
5192	2192	SR	SCGB1D2	0.961766	0.022408
5203	2203	SR	GAL3ST1	0.606598	0.0236704
5209	2209	SR	MT1HL1	0.669056	0.0240251
5210	2210	SR	MIF4GD	0.504147	0.0242028
5212	2212	SR	ADCY4	0.601163	0.0244054
5216	2216	SR	CYP20A1	0.514263	0.0247961
5220	2220	SR	NPAS1	0.644042	0.0250248
5250	2250	SR	HERC5	0.500043	0.0284606
5252	2252	SR	DDX60	0.673869	0.0286955
5255	2255	SR	GCNT2	0.849607	0.0291952
5261	2261	SR	OPLAH	0.638373	0.0299748
5269	2269	SR	NFATC1	0.662027	0.0312567
5274	2274	SR	SYDE1	0.648246	0.0317957
5280	2280	SR	CYYR1	0.605709	0.0329396
5282	2282	SR	BRCA1	0.890992	0.0331712
5286	2286	SR	MECOM	0.656745	0.0335241
5291	2291	SR	SLC16A10	0.537162	0.0336849
5297	2297	SR	TRIB1	0.528753	0.0348937
5332	2332	SR	PYROXD2	0.572492	0.0400065
5341	2341	SR	CHRAC1	0.711497	0.0407205
5343	2343	SR	CBSL	1.01847	0.0408449
5354	2354	SR	MFNG	0.613992	0.0419902
5356	2356	SR	PLK3	0.515712	0.0423454
5362	2362	SR	FGD5	0.52781	0.0432857
5363	2363	SR	ADGRV1	0.652641	0.0432912
5364	2364	SR	PRKCQ	0.705422	0.0434446
5370	2370	SR	SSH3	0.520783	0.0443533
5372	2372	SR	AGMO	0.993672	0.0447647
5374	2374	SR	SMIM3	0.59272	0.0454454
5382	2382	SR	NMI	0.552366	0.0469773
5385	2385	SR	FPR1	0.509719	0.0471882
5395	2395	SR	TRIM14	0.522281	0.0490871
6000	0	CA2	NRIP3	1.80136	0
6001	1	CA2	ATP1B1	0.884504	0
6002	2	CA2	ACTB	0.520767	4.19541e-271
6003	3	CA2	TRHDE	2.31912	1.07892e-260
6004	4	CA2	CHGB	1.15846	4.13489e-232
6005	5	CA2	SPOCK1	1.2869	1.21204e-226
6006	6	CA2	HSP90AA1	0.503229	1.8604e-203
6007	7	CA2	YWHAH	0.661027	1.84239e-189
6008	8	CA2	LYNX1	0.98936	1.13854e-188
6009	9	CA2	CNIH2	0.856727	6.36032e-180
6010	10	CA2	MAP2K4	1.07018	3.64571e-176
6011	11	CA2	PRDM8	1.42594	1.18079e-174
6012	12	CA2	NECAB1	1.06415	2.15245e-166
6013	13	CA2	TUBB2A	0.962522	6.66634e-166
6014	14	CA2	THY1	0.7224	9.03643e-166
6015	15	CA2	TMSB4X	0.538563	2.09411e-162
6016	16	CA2	ATP1A1	0.751666	3.49945e-158
6017	17	CA2	CHN1	0.754455	3.05174e-156
6018	18	CA2	HSPA8	0.525971	4.07363e-154
6019	19	CA2	CPNE4	2.18332	3.45395e-150
6020	20	CA2	ATP1A3	0.886261	2.48455e-143
6022	22	CA2	SERPINF1	2.20192	4.74479e-136
6023	23	CA2	TOMM34	0.989634	4.07443e-135
6024	24	CA2	RGS14	1.29547	1.03173e-133
6025	25	CA2	RIMS1	0.994824	8.91228e-126
6026	26	CA2	ABHD12	0.763283	1.87667e-124
6027	27	CA2	SLC24A3	0.974205	1.19634e-123
6028	28	CA2	NSF	0.746718	6.54089e-121
6029	29	CA2	DHCR24	0.905659	9.08196e-119
6030	30	CA2	LY6H	0.629484	9.64516e-119
6031	31	CA2	SLC25A22	0.784002	1.99075e-115
6033	33	CA2	FGFR1	1.34397	3.32187e-113
6034	34	CA2	SH3GL2	0.838084	5.5168e-111
6035	35	CA2	YWHAB	0.725912	3.85903e-108
6036	36	CA2	ATP6V1B2	0.588077	7.84906e-108
6037	37	CA2	NAPB	0.775274	3.13665e-107
6040	40	CA2	HS3ST4	1.61621	7.59496e-105
6041	41	CA2	INPP5F	0.89949	1.8464e-101
6042	42	CA2	CAPZA2	0.562629	4.82554e-101
6046	46	CA2	TMEM59L	0.521482	1.40873e-88
6048	48	CA2	CACNA2D3	0.923233	1.61054e-86
6049	49	CA2	NEUROD6	1.22151	3.28001e-86
6050	50	CA2	SNAP91	0.653038	5.68738e-84
6051	51	CA2	NNAT	0.736143	6.68756e-83
6053	53	CA2	SCGN	2.98202	1.39084e-81
6054	54	CA2	PRXL2A	0.715476	6.99012e-81
6055	55	CA2	NECTIN1	1.07136	7.57467e-80
6056	56	CA2	OGFRL1	0.616354	1.00263e-79
6057	57	CA2	STMN2	0.550431	1.81551e-79
6058	58	CA2	KIT	1.24572	4.93861e-78
6059	59	CA2	KLHL2	0.599476	4.20414e-77
6060	60	CA2	SLC17A7	0.500521	6.85989e-77
6061	61	CA2	GAP43	0.684582	6.85989e-77
6062	62	CA2	WASF1	0.619835	1.15663e-76
6064	64	CA2	WASL	0.890862	7.70126e-75
6065	65	CA2	DSTN	0.784456	8.80053e-74
6066	66	CA2	KCNQ5	1.39684	3.69958e-72
6067	67	CA2	CLSTN2	0.822383	9.36615e-72
6069	69	CA2	PGAM1	0.642358	1.58856e-71
6071	71	CA2	TNFAIP8L3	1.14601	6.14287e-70
6072	72	CA2	ACTR3	0.525582	1.0994e-69
6073	73	CA2	PRKCE	0.645351	6.13865e-69
6074	74	CA2	SLC8A1	0.596389	7.66265e-68
6077	77	CA2	NT5DC3	0.85628	1.44891e-65
6078	78	CA2	SYN1	0.590026	5.57636e-65
6079	79	CA2	RAB3C	0.648519	6.42896e-65
6080	80	CA2	PPP2R5C	0.5027	2.48108e-63
6083	83	CA2	VDAC1	0.555285	1.6698e-62
6085	85	CA2	NDRG3	0.635165	2.06856e-62
6086	86	CA2	RAB26	1.11846	2.86937e-62
6087	87	CA2	AFF2	0.962039	3.60168e-62
6088	88	CA2	LMO4	0.585998	4.57108e-62
6089	89	CA2	RAP1GDS1	0.840571	8.56885e-62
6091	91	CA2	ATP6V0E2	0.772229	2.29514e-61
6092	92	CA2	DYNLT3	0.716531	2.90088e-61
6094	94	CA2	PPM1E	0.779033	1.99963e-60
6095	95	CA2	MOAP1	0.808732	2.16467e-60
6096	96	CA2	SYNJ1	0.720173	3.05615e-60
6097	97	CA2	PCDH20	0.973243	1.1112e-59
6098	98	CA2	COL25A1	1.17868	2.08556e-58
6099	99	CA2	SOSTDC1	2.67197	2.75641e-58
6102	102	CA2	TUBA4A	0.594937	1.01246e-57
6103	103	CA2	SUSD4	0.728392	1.22847e-57
6104	104	CA2	HPCA	0.515914	2.94194e-57
6105	105	CA2	SLC4A8	0.627615	2.94194e-57
6106	106	CA2	MAP2K1	0.515	1.32147e-56
6111	111	CA2	KHDRBS3	0.883297	1.30535e-55
6114	114	CA2	EPS15	0.867531	4.21227e-53
6117	117	CA2	GLRX	0.909579	1.33623e-52
6118	118	CA2	CACNG8	0.782325	6.55212e-52
[truncated: 7,869 more rows]
