# Supplementary material for: Novel Pathological Mechanisms Revealed by Spatial Transcriptomic Analysis of Hippocampus in Aged Control, Primary Age-Related Tauopathy, and Alzheimer’s Disease
Source: Research Square preprint supplement (doi:10.21203/rs.3.rs-7303622/v1), 2025-08-22
Supplement: Supplementary file 3 [file 601565020f3ea530ae96a84a.xlsx]

## Sheet: Sheet1
Sample ID	Age	Sex	Thal phase	Braak stage	Groups	Tissue usage
M0309	88	M	0	I	AC	Spatial Transcriptome, IHC
M0310	79	M	0	II	AC	Spatial Transcriptome, IHC
M0827	82	F	0	I	AC	IHC
M0618	87	M	0	III	PART	Spatial Transcriptome, IHC
M0623	81	F	0	III	PART	Spatial Transcriptome, IHC
M0221	82	M	0	III	PART	IHC
M0802	92	F	3	VI	AD	Spatial Transcriptome, IHC
M0915	82	M	3	IV	AD	Spatial Transcriptome, IHC
M0322	95	M	3	IV	AD	snRNA-seq, IHC
