# Supplementary material for: Novel Pathological Mechanisms Revealed by Spatial Transcriptomic Analysis of Hippocampus in Aged Control, Primary Age-Related Tauopathy, and Alzheimer’s Disease
Source: Research Square preprint supplement (doi:10.21203/rs.3.rs-7303622/v1), 2025-08-22
Supplement: Supplementary file 4 [file c2ba2c473237b12d530bd0a1.xlsx]

## Sheet: Ast_CA1
Unnamed: 0	p_val	avg_log2FC	pct.1	pct.2	p_val_adj	cluster	gene
HSPA1B	4.32286e-299	3.69159	0.508	0.06	5.84753e-295	Control	HSPA1B
HSPA1A	3.14299e-296	5.37364	0.407	0.019	4.25153e-292	Control	HSPA1A
DNAJB1	5.7729e-106	3.44742	0.229	0.034	7.80901e-102	Control	DNAJB1
APOE	8.66632e-76	0.435502	0.996	0.981	1.17229e-71	Control	APOE
UBB	1.33157e-69	1.72633	0.475	0.273	1.80122e-65	Control	UBB
HSP90AA1	1.43021e-68	0.450122	1	0.997	1.93465e-64	Control	HSP90AA1
HSPB1	1.57275e-50	0.839224	0.613	0.457	2.12746e-46	Control	HSPB1
S100A1	4.66012e-48	0.41789	0.942	0.897	6.30374e-44	Control	S100A1
HSPA8	9.89836e-42	0.591781	0.757	0.641	1.33895e-37	Control	HSPA8
CST3	1.56129e-39	0.227084	0.999	0.997	2.11196e-35	Control	CST3
UBC	7.9164e-36	0.142735	1	1	1.07085e-31	Control	UBC
HSPA5	4.18852e-34	1.47152	0.229	0.1	5.66582e-30	Control	HSPA5
PTGDS	1.23932e-30	0.698594	0.521	0.423	1.67643e-26	Control	PTGDS
PLEKHB1	7.23651e-30	0.463141	0.731	0.64	9.78882e-26	Control	PLEKHB1
SLC1A2	4.65905e-27	0.245669	1	0.999	6.3023e-23	Control	SLC1A2
MFSD11	7.38254e-26	4.99122	0.073	0.015	9.98636e-22	Control	MFSD11
FBXO2	1.21798e-25	0.724591	0.521	0.4	1.64756e-21	Control	FBXO2
CRYAB	4.36138e-25	0.248869	0.963	0.965	5.89964e-21	Control	CRYAB
HSP90AB1	1.25195e-24	1.35802	0.316	0.206	1.69351e-20	Control	HSP90AB1
ACOT7	2.10151e-23	1.25067	0.235	0.127	2.84271e-19	Control	ACOT7
RTN4	8.16888e-23	0.51226	0.704	0.65	1.105e-18	Control	RTN4
BAG3	9.31264e-23	1.32769	0.203	0.103	1.25972e-18	Control	BAG3
RTN1	3.59225e-22	1.75035	0.23	0.134	4.85924e-18	Control	RTN1
ALDH2	6.67897e-22	0.678311	0.489	0.376	9.03464e-18	Control	ALDH2
MT3	1.9e-21	0.173534	0.999	0.999	2.57012e-17	Control	MT3
KLHL24	2.00217e-21	1.071	0.275	0.168	2.70833e-17	Control	KLHL24
ATP1B2	4.2501e-21	0.274027	0.944	0.935	5.74911e-17	Control	ATP1B2
AKT3	7.78797e-21	0.688919	0.466	0.359	1.05348e-16	Control	AKT3
NEFM	8.62903e-20	1.72305	0.103	0.037	1.16725e-15	Control	NEFM
SNCG	5.58312e-19	0.564943	0.497	0.387	7.55229e-15	Control	SNCG
SIRPA	2.34699e-18	2.10755	0.049	0.009	3.17477e-14	Control	SIRPA
SRSF2	3.13661e-18	5.12892	0.044	0.007	4.24289e-14	Control	SRSF2
ID2	7.21037e-18	0.730657	0.443	0.353	9.75347e-14	Control	ID2
STMN3	7.88278e-18	0.692959	0.422	0.329	1.0663e-13	Control	STMN3
NDRG2	6.04427e-17	0.139483	0.998	0.995	8.17609e-13	Control	NDRG2
UQCRB	2.72804e-15	0.497121	0.549	0.48	3.69022e-11	Control	UQCRB
SLC22A17	1.02361e-14	0.63299	0.517	0.463	1.38463e-10	Control	SLC22A17
QKI	1.89813e-14	0.175734	0.915	0.915	2.5676e-10	Control	QKI
MBP	1.48927e-13	0.403188	0.523	0.461	2.01453e-09	Control	MBP
NRXN1	2.56006e-13	0.378048	0.631	0.584	3.46299e-09	Control	NRXN1
HSPB8	7.74007e-13	0.41035	0.592	0.527	1.047e-08	Control	HSPB8
GLUL	1.90103e-12	0.182018	0.998	0.999	2.57152e-08	Control	GLUL
TUBB2A	1.97829e-12	0.893051	0.427	0.398	2.67604e-08	Control	TUBB2A
PTN	2.14186e-12	0.524282	0.45	0.384	2.8973e-08	Control	PTN
PJA2	2.46341e-12	1.14687	0.247	0.177	3.33225e-08	Control	PJA2
LMO3	2.54902e-12	0.355753	0.746	0.738	3.44806e-08	Control	LMO3
PADI2	5.52692e-12	1.13094	0.143	0.08	7.47627e-08	Control	PADI2
PEA15	6.2242e-12	0.147071	0.857	0.863	8.41948e-08	Control	PEA15
CXCL14	2.00505e-11	0.661389	0.407	0.335	2.71223e-07	Control	CXCL14
G0S2	3.9146e-10	3.98236	0.017	0.002	5.29528e-06	Control	G0S2
AQP4	1.19901e-09	0.179063	0.989	0.991	1.62191e-05	Control	AQP4
ITPKB	3.12283e-09	0.533851	0.265	0.192	4.22425e-05	Control	ITPKB
SPOCK2	3.5828e-09	0.544583	0.362	0.3	4.84645e-05	Control	SPOCK2
ARHGEF4	5.42388e-09	0.14294	0.92	0.895	7.33689e-05	Control	ARHGEF4
ITM2C	5.50758e-09	0.231782	0.768	0.745	7.4501e-05	Control	ITM2C
ATP1A2	5.74706e-09	0.136709	0.984	0.978	7.77405e-05	Control	ATP1A2
SLC25A48	6.01902e-09	1.15355	0.038	0.012	8.14193e-05	Control	SLC25A48
HMGB1	8.38104e-09	0.403033	0.525	0.482	0.00011337	Control	HMGB1
GPM6A	1.17212e-08	0.323374	0.978	0.987	0.000158553	Control	GPM6A
COX4I1	1.5078e-08	0.532663	0.366	0.309	0.00020396	Control	COX4I1
FXYD1	2.6647e-08	0.254291	0.753	0.74	0.000360453	Control	FXYD1
MARCKS	4.44079e-08	0.457435	0.369	0.315	0.000600705	Control	MARCKS
DDIT4	6.59017e-08	0.682953	0.235	0.176	0.000891453	Control	DDIT4
SOD1	9.85407e-08	0.103948	0.952	0.964	0.00133296	Control	SOD1
KIAA0930	1.20658e-07	0.448029	0.405	0.358	0.00163213	Control	KIAA0930
SPTAN1	2.32312e-07	0.34566	0.478	0.437	0.00314249	Control	SPTAN1
AHSA1	3.30681e-07	0.814524	0.139	0.091	0.00447312	Control	AHSA1
NEFL	3.74081e-07	1.05237	0.095	0.055	0.00506019	Control	NEFL
PEBP1	5.18582e-07	0.112469	0.92	0.928	0.00701486	Control	PEBP1
ENHO	5.23393e-07	0.339991	0.537	0.502	0.00707994	Control	ENHO
SQSTM1	6.02974e-07	0.202818	0.677	0.668	0.00815643	Control	SQSTM1
AQP1	8.15648e-07	0.238414	0.652	0.61	0.0110333	Control	AQP1
AIFM3	8.28628e-07	0.453443	0.337	0.279	0.0112089	Control	AIFM3
CCK	1.3093e-06	0.407762	0.352	0.297	0.0177109	Control	CCK
PHGDH	1.43433e-06	0.780233	0.204	0.155	0.0194021	Control	PHGDH
PTK2	1.69631e-06	0.359511	0.457	0.43	0.022946	Control	PTK2
PNISR	2.11247e-06	0.542824	0.302	0.254	0.0285754	Control	PNISR
ARGLU1	2.69553e-06	0.573068	0.289	0.241	0.0364624	Control	ARGLU1
AVIL	2.98555e-06	3.57436	0.01	0.001	0.0403856	Control	AVIL
SERPINA3	6.9237e-213	3.01026	0.463	0.087	9.36568e-209	Part	SERPINA3
S100B	4.46037e-210	0.53126	0.998	0.974	6.03354e-206	Part	S100B
SPP1	6.20734e-209	4.4324	0.339	0.019	8.39667e-205	Part	SPP1
MT1X	5.7701e-180	1.11505	0.839	0.615	7.80522e-176	Part	MT1X
RHBDD2	1.56239e-168	1.69832	0.618	0.251	2.11345e-164	Part	RHBDD2
HPCA	1.92604e-113	2.71585	0.294	0.061	2.60535e-109	Part	HPCA
HOPX	1.10625e-105	0.885819	0.77	0.469	1.49642e-101	Part	HOPX
APP	1.01285e-102	0.770908	0.859	0.544	1.37009e-98	Part	APP
SERINC1	4.79724e-102	1.62836	0.455	0.188	6.48922e-98	Part	SERINC1
MT2A	5.1774e-96	0.41391	0.986	0.957	7.00346e-92	Part	MT2A
YWHAQ	1.69893e-86	0.983809	0.628	0.353	2.29814e-82	Part	YWHAQ
SLC1A3	3.58076e-83	0.38142	0.998	0.985	4.8437e-79	Part	SLC1A3
C1orf61	2.22391e-72	0.502562	0.985	0.919	3.00829e-68	Part	C1orf61
HNRNPC	1.66372e-63	0.702276	0.699	0.452	2.25051e-59	Part	HNRNPC
LY6H	7.09001e-60	2.03527	0.221	0.065	9.59065e-56	Part	LY6H
PPDPF	1.33807e-58	1.33708	0.351	0.159	1.81e-54	Part	PPDPF
CALR	2.59367e-52	1.92997	0.216	0.071	3.50846e-48	Part	CALR
CADM3	2.87553e-52	0.470128	0.881	0.669	3.88973e-48	Part	CADM3
NTRK2	4.34621e-44	0.226053	0.998	0.991	5.87912e-40	Part	NTRK2
IFITM3	2.09114e-43	1.35571	0.276	0.127	2.82868e-39	Part	IFITM3
MGST1	2.30885e-42	0.552281	0.715	0.53	3.12318e-38	Part	MGST1
USP22	2.832e-42	0.583347	0.66	0.468	3.83085e-38	Part	USP22
SLCO1C1	3.31859e-42	0.708095	0.469	0.267	4.48906e-38	Part	SLCO1C1
ATP6V1E1	2.87686e-41	1.24154	0.28	0.129	3.89152e-37	Part	ATP6V1E1
ACTB	1.77037e-40	0.146083	1	0.994	2.39478e-36	Part	ACTB
NRGN	2.45068e-40	1.48196	0.238	0.103	3.31504e-36	Part	NRGN
GABARAP	3.36098e-39	1.07386	0.333	0.18	4.54639e-35	Part	GABARAP
CRYAB1	1.87249e-37	0.218547	0.982	0.952	2.53291e-33	Part	CRYAB
CPE	9.78462e-37	0.239503	1	1	1.32356e-32	Part	CPE
GABRA2	8.16193e-36	0.437763	0.782	0.617	1.10406e-31	Part	GABRA2
LYVE1	2.44489e-34	0.566056	0.412	0.227	3.3072e-30	Part	LYVE1
OCIAD1	4.48036e-34	0.426463	0.787	0.601	6.06059e-30	Part	OCIAD1
TMBIM6	7.25461e-34	0.444379	0.746	0.572	9.8133e-30	Part	TMBIM6
HACD3	2.93633e-33	0.61426	0.485	0.308	3.97198e-29	Part	HACD3
MT1E	3.19624e-33	0.168426	0.968	0.915	4.32356e-29	Part	MT1E
CSTB	4.705e-32	1.10804	0.252	0.124	6.36446e-28	Part	CSTB
GJA1	9.23987e-32	0.235152	0.978	0.943	1.24988e-27	Part	GJA1
PRNP	8.05149e-31	0.251774	0.988	0.937	1.08913e-26	Part	PRNP
ITGB8	1.93511e-30	0.780519	0.37	0.222	2.61762e-26	Part	ITGB8
LRRC3B	8.05454e-30	0.613887	0.426	0.264	1.08954e-25	Part	LRRC3B
FAIM2	1.04319e-29	0.718875	0.408	0.261	1.41112e-25	Part	FAIM2
DPP10	1.66387e-29	1.511	0.148	0.054	2.25072e-25	Part	DPP10
NPTN	3.44492e-29	0.739831	0.379	0.23	4.65994e-25	Part	NPTN
PRKAR1B	1.49016e-28	0.770344	0.343	0.202	2.01574e-24	Part	PRKAR1B
CD63	5.05667e-28	0.861684	0.324	0.194	6.84015e-24	Part	CD63
GJB6	8.65905e-28	0.669621	0.4	0.249	1.17131e-23	Part	GJB6
LRPAP1	1.02046e-27	1.09426	0.229	0.115	1.38037e-23	Part	LRPAP1
SERPINE2	2.52337e-27	0.584412	0.544	0.391	3.41336e-23	Part	SERPINE2
UCHL11	5.4394e-27	0.477882	0.578	0.422	7.35788e-23	Part	UCHL1
YWHAG	5.97935e-27	0.332308	0.863	0.68	8.08827e-23	Part	YWHAG
MT31	4.666e-26	0.161992	0.999	0.998	6.3117e-22	Part	MT3
CCL2	7.11905e-26	2.53005	0.066	0.011	9.62994e-22	Part	CCL2
CD44	4.50299e-25	0.572907	0.401	0.254	6.0912e-21	Part	CD44
COX6B1	4.95375e-25	0.538019	0.49	0.342	6.70093e-21	Part	COX6B1
SCAMP5	9.10668e-25	0.651727	0.384	0.247	1.23186e-20	Part	SCAMP5
SLC44A3	9.28427e-25	1.44147	0.115	0.038	1.25588e-20	Part	SLC44A3
COPS9	2.22317e-24	0.353881	0.629	0.451	3.00728e-20	Part	COPS9
PEA151	1.29673e-23	0.2707	0.949	0.802	1.75409e-19	Part	PEA15
NAPA	2.03989e-23	0.4843	0.512	0.363	2.75936e-19	Part	NAPA
GABRB1	3.35801e-23	0.820067	0.244	0.133	4.54238e-19	Part	GABRB1
MAP2	4.86294e-23	0.646448	0.398	0.267	6.5781e-19	Part	MAP2
ATP5PD	7.01048e-23	0.702247	0.291	0.169	9.48308e-19	Part	ATP5PD
APOC1	8.84493e-23	1.29036	0.119	0.043	1.19645e-18	Part	APOC1
TMEM59L	1.01667e-22	0.327533	0.692	0.535	1.37525e-18	Part	TMEM59L
SPARCL1	7.1146e-22	0.251947	0.919	0.826	9.62391e-18	Part	SPARCL1
SYNGR1	1.28639e-21	0.433719	0.574	0.436	1.7401e-17	Part	SYNGR1
ITGB4	1.9648e-21	0.521775	0.335	0.207	2.65778e-17	Part	ITGB4
ARHGAP5	2.44075e-21	0.576389	0.386	0.256	3.3016e-17	Part	ARHGAP5
RGS20	3.7005e-21	0.691155	0.268	0.155	5.00567e-17	Part	RGS20
PTGES3	3.89693e-21	0.38367	0.612	0.47	5.27137e-17	Part	PTGES3
MDH1	4.10082e-21	0.610863	0.308	0.186	5.54718e-17	Part	MDH1
DNAH7	7.00967e-21	0.787057	0.238	0.135	9.48198e-17	Part	DNAH7
RASD1	1.05662e-20	0.637133	0.381	0.26	1.42929e-16	Part	RASD1
F3	1.14751e-20	0.3726	0.586	0.435	1.55224e-16	Part	F3
OLFM1	2.07101e-20	0.381091	0.602	0.476	2.80146e-16	Part	OLFM1
FABP7	4.09273e-20	0.780773	0.261	0.157	5.53623e-16	Part	FABP7
CPLX2	6.19158e-20	0.933206	0.257	0.163	8.37535e-16	Part	CPLX2
PSD3	7.67702e-20	0.349946	0.678	0.538	1.03847e-15	Part	PSD3
CANX	9.61682e-20	0.808982	0.263	0.16	1.30087e-15	Part	CANX
SEC11C	2.3775e-19	0.411165	0.508	0.364	3.21605e-15	Part	SEC11C
ATP5F1E	2.41454e-19	0.284324	0.706	0.544	3.26614e-15	Part	ATP5F1E
ATP6V0B	3.42132e-19	1.51998	0.111	0.044	4.62802e-15	Part	ATP6V0B
ATP5IF11	1.73765e-18	0.386706	0.559	0.422	2.35052e-14	Part	ATP5IF1
OGA	2.2531e-18	0.820764	0.287	0.188	3.04777e-14	Part	OGA
CNN3	2.87827e-18	0.349949	0.658	0.544	3.89344e-14	Part	CNN3
SCG2	5.00663e-18	1.19159	0.141	0.067	6.77247e-14	Part	SCG2
NCAM1	5.04003e-18	0.319728	0.629	0.495	6.81765e-14	Part	NCAM1
SEM1	6.01759e-18	0.621932	0.288	0.182	8.13999e-14	Part	SEM1
MAPT	7.56711e-18	0.276693	0.834	0.69	1.0236e-13	Part	MAPT
HIST1H4C	1.58959e-17	0.507803	0.367	0.254	2.15024e-13	Part	HIST1H4C
TOMM7	1.62241e-17	0.50826	0.413	0.302	2.19463e-13	Part	TOMM7
OTUB1	4.53155e-17	0.530549	0.382	0.272	6.12982e-13	Part	OTUB1
PABPC1	7.11569e-17	0.873459	0.218	0.132	9.6254e-13	Part	PABPC1
SNAP251	1.22357e-16	0.554293	0.344	0.236	1.65513e-12	Part	SNAP25
ATP2A2	1.3856e-16	0.363988	0.506	0.384	1.8743e-12	Part	ATP2A2
ATP5F1B1	1.7508e-16	0.3628	0.584	0.465	2.36831e-12	Part	ATP5F1B
CALM3	2.11496e-16	0.158261	0.973	0.89	2.86091e-12	Part	CALM3
SOD11	2.48062e-16	0.177382	0.987	0.943	3.35554e-12	Part	SOD1
MYBPC1	3.40808e-16	0.590994	0.291	0.188	4.61011e-12	Part	MYBPC1
GPC5	3.59165e-16	0.48842	0.376	0.263	4.85842e-12	Part	GPC5
NQO1	8.11829e-16	1.1893	0.135	0.067	1.09816e-11	Part	NQO1
JUNB	1.13889e-15	1.30335	0.093	0.037	1.54057e-11	Part	JUNB
EDF1	1.84421e-15	0.555983	0.37	0.271	2.49466e-11	Part	EDF1
HTRA1	2.04158e-15	0.503196	0.374	0.274	2.76164e-11	Part	HTRA1
SLC47A2	3.46387e-15	1.35068	0.066	0.021	4.68557e-11	Part	SLC47A2
ETNPPL	3.50766e-15	0.339478	0.851	0.766	4.74482e-11	Part	ETNPPL
ABCC9	3.69471e-15	0.875649	0.125	0.06	4.99783e-11	Part	ABCC9
LGI1	4.11776e-15	0.240752	0.758	0.637	5.5701e-11	Part	LGI1
FTL	4.87252e-15	0.120967	0.989	0.975	6.59106e-11	Part	FTL
SCG31	5.22263e-15	0.322924	0.552	0.438	7.06465e-11	Part	SCG3
GABARAPL2	5.77109e-15	0.401368	0.485	0.384	7.80656e-11	Part	GABARAPL2
MT1H	6.27659e-15	0.519369	0.251	0.157	8.49034e-11	Part	MT1H
LPIN3	9.6226e-15	1.28488	0.089	0.036	1.30165e-10	Part	LPIN3
CHL1	9.66354e-15	0.59934	0.283	0.188	1.30719e-10	Part	CHL1
NDFIP1	1.09394e-14	0.270417	0.667	0.529	1.47977e-10	Part	NDFIP1
MRO	1.3771e-14	0.402122	0.434	0.319	1.8628e-10	Part	MRO
PFN2	1.6989e-14	0.582179	0.305	0.213	2.2981e-10	Part	PFN2
PHYHIPL	1.74284e-14	0.641449	0.252	0.165	2.35754e-10	Part	PHYHIPL
NDUFS5	2.34758e-14	0.292061	0.602	0.475	3.17557e-10	Part	NDUFS5
RIDA	2.44514e-14	0.782348	0.212	0.133	3.30755e-10	Part	RIDA
CAMK2N1	3.949e-14	1.13931	0.145	0.08	5.34181e-10	Part	CAMK2N1
CAPS	5.71735e-14	0.694177	0.153	0.083	7.73386e-10	Part	CAPS
RYR3	8.25663e-14	0.761405	0.173	0.1	1.11687e-09	Part	RYR3
FGF2	8.56239e-14	0.435145	0.343	0.242	1.15823e-09	Part	FGF2
SLC7A11	1.06488e-13	0.439257	0.355	0.257	1.44046e-09	Part	SLC7A11
GSN	1.48407e-13	0.318768	0.534	0.421	2.00751e-09	Part	GSN
TMBIM1	1.58817e-13	0.783777	0.17	0.099	2.14832e-09	Part	TMBIM1
ALDH1L1	2.99899e-13	0.303741	0.537	0.418	4.05674e-09	Part	ALDH1L1
DKK3	3.52724e-13	0.113525	0.999	0.994	4.77129e-09	Part	DKK3
SNX3	3.73629e-13	0.446616	0.377	0.283	5.05408e-09	Part	SNX3
ATP5MG	4.04508e-13	0.462578	0.313	0.218	5.47178e-09	Part	ATP5MG
WBP2	4.44908e-13	0.239569	0.671	0.545	6.01827e-09	Part	WBP2
SYT11	4.56776e-13	0.236104	0.713	0.592	6.17881e-09	Part	SYT11
CYCS	5.02397e-13	0.493661	0.248	0.163	6.79593e-09	Part	CYCS
TEF	5.54389e-13	0.521152	0.335	0.246	7.49922e-09	Part	TEF
CHCHD2	5.76596e-13	0.391906	0.336	0.243	7.79962e-09	Part	CHCHD2
BMPR1B	6.34917e-13	0.420614	0.295	0.202	8.58853e-09	Part	BMPR1B
RORB	1.39249e-12	0.650132	0.21	0.134	1.88362e-08	Part	RORB
CLIC4	1.46053e-12	1.67513	0.057	0.019	1.97566e-08	Part	CLIC4
CPNE6	1.62583e-12	0.219335	0.765	0.647	2.19925e-08	Part	CPNE6
SLC1A4	1.71991e-12	0.331877	0.494	0.391	2.32653e-08	Part	SLC1A4
TSPYL4	1.79762e-12	1.18562	0.103	0.051	2.43164e-08	Part	TSPYL4
HNRNPA2B1	1.84861e-12	0.280795	0.574	0.469	2.50061e-08	Part	HNRNPA2B1
PTPRZ1	1.9082e-12	0.400101	0.382	0.288	2.58123e-08	Part	PTPRZ1
APLP2	2.16204e-12	0.862712	0.149	0.085	2.92459e-08	Part	APLP2
SLC39A12	2.3406e-12	0.309493	0.368	0.264	3.16614e-08	Part	SLC39A12
LTF	3.63541e-12	0.938719	0.077	0.032	4.91762e-08	Part	LTF
HPCAL4	1.56261e-11	1.36553	0.095	0.048	2.11375e-07	Part	HPCAL4
EIF4A1	2.00906e-11	0.952353	0.127	0.071	2.71766e-07	Part	EIF4A1
ALDH1A1	2.16289e-11	0.404691	0.185	0.112	2.92575e-07	Part	ALDH1A1
COX6C	2.56156e-11	0.182837	0.715	0.594	3.46502e-07	Part	COX6C
IDI1	3.12935e-11	0.685174	0.174	0.108	4.23307e-07	Part	IDI1
ADGRV1	3.20958e-11	0.872525	0.132	0.074	4.34159e-07	Part	ADGRV1
ATP13A4	3.40905e-11	0.516692	0.257	0.179	4.61142e-07	Part	ATP13A4
ATP6V1H	3.64562e-11	0.411756	0.4	0.316	4.93143e-07	Part	ATP6V1H
SDC2	3.79228e-11	0.484756	0.223	0.147	5.12982e-07	Part	SDC2
PAX6	6.79787e-11	0.398567	0.249	0.168	9.19548e-07	Part	PAX6
EYA1	7.30308e-11	0.359657	0.292	0.205	9.87888e-07	Part	EYA1
BBOX1	1.21348e-10	0.461881	0.251	0.173	1.64148e-06	Part	BBOX1
ENO2	1.27325e-10	0.334568	0.517	0.428	1.72233e-06	Part	ENO2
ATP5ME	1.28885e-10	0.272494	0.467	0.367	1.74343e-06	Part	ATP5ME
NUPR1	1.50604e-10	0.416044	0.319	0.239	2.03722e-06	Part	NUPR1
CYBRD1	1.733e-10	0.96992	0.089	0.044	2.34423e-06	Part	CYBRD1
HILPDA	2.20551e-10	0.782518	0.124	0.071	2.9834e-06	Part	HILPDA
DYNLL2	2.26281e-10	0.516446	0.317	0.247	3.0609e-06	Part	DYNLL2
SLC44A2	2.43325e-10	0.794416	0.136	0.081	3.29146e-06	Part	SLC44A2
SNCA	2.60876e-10	1.64919	0.051	0.019	3.52887e-06	Part	SNCA
CYP4F11	2.73926e-10	0.688975	0.08	0.037	3.7054e-06	Part	CYP4F11
AK4	3.39699e-10	0.53261	0.187	0.121	4.5951e-06	Part	AK4
SOD2	3.81866e-10	0.523275	0.259	0.187	5.1655e-06	Part	SOD2
NDRG4	4.19988e-10	0.237218	0.629	0.533	5.68118e-06	Part	NDRG4
ELOVL2	4.26195e-10	0.283238	0.416	0.32	5.76514e-06	Part	ELOVL2
STK33	4.64972e-10	0.69037	0.15	0.092	6.28967e-06	Part	STK33
ZSCAN18	5.12383e-10	0.485849	0.265	0.19	6.93101e-06	Part	ZSCAN18
GABRG1	5.20166e-10	1.03349	0.106	0.058	7.03629e-06	Part	GABRG1
GTF3C6	5.21566e-10	0.505851	0.212	0.143	7.05522e-06	Part	GTF3C6
FNBP1	5.84932e-10	0.374426	0.329	0.245	7.91238e-06	Part	FNBP1
NTSR2	6.18098e-10	0.417754	0.243	0.169	8.36101e-06	Part	NTSR2
PIFO	7.43962e-10	0.887225	0.098	0.052	1.00636e-05	Part	PIFO
AHCYL1	7.80883e-10	0.169403	0.817	0.741	1.0563e-05	Part	AHCYL1
DOCK7	9.64086e-10	0.657758	0.147	0.091	1.30412e-05	Part	DOCK7
EIF3M	1.06906e-09	1.03755	0.081	0.04	1.44612e-05	Part	EIF3M
EID1	1.07541e-09	0.346416	0.377	0.298	1.45471e-05	Part	EID1
SLC16A9	1.12966e-09	0.34616	0.22	0.147	1.5281e-05	Part	SLC16A9
TSPAN3	1.34105e-09	0.244449	0.468	0.371	1.81403e-05	Part	TSPAN3
TNNT1	1.77119e-09	0.586295	0.217	0.152	2.39589e-05	Part	TNNT1
NCDN	2.10769e-09	0.137104	0.905	0.794	2.85107e-05	Part	NCDN
CYB5B	2.32625e-09	0.270365	0.37	0.281	3.14672e-05	Part	CYB5B
SDS	2.33569e-09	0.681739	0.103	0.056	3.15949e-05	Part	SDS
GOT1	2.3828e-09	0.355304	0.331	0.249	3.22322e-05	Part	GOT1
SERPINI1	2.51609e-09	1.43242	0.05	0.019	3.40352e-05	Part	SERPINI1
CCK1	2.61955e-09	0.368557	0.36	0.278	3.54347e-05	Part	CCK
RAB18	2.99711e-09	0.700615	0.148	0.093	4.05419e-05	Part	RAB18
ATP5PF	3.29841e-09	0.330595	0.325	0.247	4.46176e-05	Part	ATP5PF
RNF182	3.34839e-09	0.289406	0.364	0.277	4.52936e-05	Part	RNF182
WDR49	3.4598e-09	0.461776	0.197	0.133	4.68007e-05	Part	WDR49
C5orf49	3.97097e-09	1.65256	0.033	0.01	5.37153e-05	Part	C5orf49
KCNIP2	3.98558e-09	1.47587	0.05	0.02	5.3913e-05	Part	KCNIP2
PAFAH1B1	4.6842e-09	0.506439	0.235	0.168	6.33631e-05	Part	PAFAH1B1
CHI3L1	4.73196e-09	0.259943	0.347	0.26	6.40093e-05	Part	CHI3L1
PON2	5.58178e-09	0.416799	0.346	0.274	7.55047e-05	Part	PON2
ADHFE1	5.6013e-09	0.305307	0.307	0.229	7.57687e-05	Part	ADHFE1
PCMT1	6.01046e-09	0.908576	0.093	0.05	8.13034e-05	Part	PCMT1
NKAIN3	7.17613e-09	0.549704	0.186	0.127	9.70715e-05	Part	NKAIN3
RGR	8.70418e-09	0.996021	0.079	0.04	0.000117742	Part	RGR
CHI3L2	1.2862e-08	0.998717	0.067	0.032	0.000173984	Part	CHI3L2
COMMD6	1.42778e-08	1.31133	0.041	0.015	0.000193136	Part	COMMD6
DNER	1.4443e-08	1.47889	0.044	0.017	0.000195371	Part	DNER
FOS	1.46477e-08	0.692668	0.085	0.045	0.000198139	Part	FOS
FMNL2	1.67718e-08	0.658186	0.157	0.104	0.000226872	Part	FMNL2
ERBB2	1.87621e-08	0.976677	0.083	0.044	0.000253795	Part	ERBB2
PARK7	2.39922e-08	0.21689	0.488	0.402	0.000324543	Part	PARK7
FDFT1	2.76434e-08	1.01142	0.079	0.042	0.000373932	Part	FDFT1
ABI3BP	3.03391e-08	1.01775	0.067	0.033	0.000410397	Part	ABI3BP
FADS3	3.09833e-08	0.53559	0.12	0.072	0.000419111	Part	FADS3
PKIA	3.97496e-08	0.242428	0.412	0.328	0.000537693	Part	PKIA
SLC6A11	4.27034e-08	0.477327	0.167	0.112	0.000577649	Part	SLC6A11
GDF10	4.43196e-08	0.913005	0.067	0.033	0.000599511	Part	GDF10
FABP5	4.58977e-08	0.62371	0.126	0.078	0.000620858	Part	FABP5
LIFR	4.78164e-08	0.392276	0.269	0.204	0.000646812	Part	LIFR
PPP3CA	4.83458e-08	0.267739	0.405	0.332	0.000653973	Part	PPP3CA
PMP22	5.31076e-08	0.53958	0.158	0.106	0.000718386	Part	PMP22
EPHX1	5.55118e-08	0.167387	0.569	0.473	0.000750908	Part	EPHX1
UQCRQ	6.20024e-08	0.355329	0.285	0.218	0.000838706	Part	UQCRQ
LIX1	7.77685e-08	0.364767	0.178	0.121	0.00105197	Part	LIX1
RAB5A	9.81426e-08	0.519766	0.167	0.114	0.00132758	Part	RAB5A
NPAS3	1.04825e-07	0.164683	0.722	0.633	0.00141797	Part	NPAS3
ARMH1	1.08357e-07	0.942932	0.07	0.037	0.00146574	Part	ARMH1
FAM189A2	1.13351e-07	0.368983	0.192	0.134	0.0015333	Part	FAM189A2
GADD45A	1.13486e-07	1.38218	0.042	0.017	0.00153512	Part	GADD45A
ACBD7	1.24375e-07	0.177723	0.708	0.604	0.00168242	Part	ACBD7
CD81	1.36641e-07	0.13239	0.796	0.689	0.00184834	Part	CD81
CNTFR	1.47685e-07	0.208181	0.365	0.283	0.00199774	Part	CNTFR
PMP21	1.85295e-07	0.16136	0.705	0.613	0.00250649	Part	PMP2
KREMEN1	1.92245e-07	0.346968	0.254	0.191	0.0026005	Part	KREMEN1
ATP6V1G2	2.07824e-07	0.240672	0.535	0.461	0.00281124	Part	ATP6V1G2
ADGRG1	2.14879e-07	0.433468	0.233	0.173	0.00290666	Part	ADGRG1
SYNPO2	2.1993e-07	0.527495	0.127	0.081	0.002975	Part	SYNPO2
LPAR3	2.22687e-07	0.667249	0.136	0.09	0.00301229	Part	LPAR3
TPP1	2.61871e-07	0.359169	0.268	0.204	0.00354233	Part	TPP1
MGAT4C	2.68431e-07	0.909015	0.079	0.044	0.00363107	Part	MGAT4C
ENKUR	3.26332e-07	0.658202	0.091	0.053	0.00441429	Part	ENKUR
SLIRP	3.29658e-07	0.26665	0.258	0.192	0.00445929	Part	SLIRP
TCTN1	3.51616e-07	0.763481	0.074	0.04	0.00475631	Part	TCTN1
MBOAT2	3.95141e-07	1.02892	0.061	0.031	0.00534507	Part	MBOAT2
MFGE8	4.64156e-07	0.704917	0.113	0.072	0.00627864	Part	MFGE8
PNMA2	5.54425e-07	0.339534	0.305	0.241	0.00749971	Part	PNMA2
C1R	6.60504e-07	1.93908	0.026	0.008	0.00893464	Part	C1R
TSPYL1	7.25766e-07	1.12963	0.056	0.028	0.00981743	Part	TSPYL1
COLEC12	7.5606e-07	0.551388	0.131	0.087	0.0102272	Part	COLEC12
RFX4	7.84781e-07	0.328857	0.153	0.103	0.0106157	Part	RFX4
ACOT11	8.21648e-07	0.349318	0.194	0.139	0.0111144	Part	ACOT11
NDUFB6	8.28506e-07	0.652068	0.124	0.081	0.0112072	Part	NDUFB6
ANK2	8.29799e-07	0.129521	0.82	0.726	0.0112247	Part	ANK2
ATP2B4	8.5902e-07	0.565494	0.178	0.129	0.01162	Part	ATP2B4
RAMP1	9.24481e-07	0.18696	0.528	0.447	0.0125055	Part	RAMP1
YARS	9.32886e-07	0.9239	0.056	0.028	0.0126191	Part	YARS
FKBP3	9.53591e-07	0.452703	0.204	0.151	0.0128992	Part	FKBP3
NT5C2	1.0703e-06	0.758927	0.088	0.053	0.014478	Part	NT5C2
CABLES1	1.08728e-06	0.237019	0.333	0.265	0.0147077	Part	CABLES1
ERH	1.1821e-06	0.864584	0.067	0.037	0.0159902	Part	ERH
REEP5	1.46971e-06	0.814768	0.102	0.065	0.0198808	Part	REEP5
TGFB2	1.54585e-06	0.330263	0.244	0.186	0.0209107	Part	TGFB2
HNRNPDL1	1.79301e-06	0.196284	0.523	0.447	0.0242541	Part	HNRNPDL
THBS4	1.88972e-06	1.51048	0.028	0.01	0.0255623	Part	THBS4
KIAA0319	2.03377e-06	0.440382	0.14	0.095	0.0275108	Part	KIAA0319
UBL5	2.07996e-06	0.629381	0.077	0.044	0.0281356	Part	UBL5
ATP9A	2.25707e-06	0.195138	0.442	0.371	0.0305314	Part	ATP9A
MYLK	2.45058e-06	0.207926	0.404	0.336	0.033149	Part	MYLK
TMEM230	2.62727e-06	0.66681	0.106	0.069	0.0355391	Part	TMEM230
VASN	2.86231e-06	0.463246	0.124	0.083	0.0387185	Part	VASN
EFEMP1	2.94377e-06	0.251388	0.237	0.179	0.0398204	Part	EFEMP1
ADGRA3	3.29604e-06	0.124096	0.386	0.304	0.0445855	Part	ADGRA3
STMN31	3.42941e-06	0.239934	0.394	0.327	0.0463896	Part	STMN3
SPATA17	3.59868e-06	0.983677	0.038	0.016	0.0486794	Part	SPATA17
CNIH2	2.04504e-93	2.51723	0.233	0.041	2.76633e-89	AD	CNIH2
NSMF	8.92523e-87	0.532361	0.988	0.99	1.20732e-82	AD	NSMF
GIT1	1.36507e-82	1.83361	0.31	0.092	1.84653e-78	AD	GIT1
MT1G	3.30998e-70	0.74481	0.915	0.826	4.47741e-66	AD	MT1G
B3GAT1	3.7546e-67	2.1502	0.191	0.039	5.07884e-63	AD	B3GAT1
MTURN	4.62396e-65	0.831617	0.672	0.487	6.25483e-61	AD	MTURN
CCDC85B	2.12401e-58	5.8933	0.084	0.002	2.87315e-54	AD	CCDC85B
BTBD2	5.59565e-54	2.00237	0.167	0.037	7.56923e-50	AD	BTBD2
AGAP3	9.7634e-54	1.96514	0.166	0.037	1.3207e-49	AD	AGAP3
GUK1	1.08595e-52	1.42718	0.25	0.084	1.46896e-48	AD	GUK1
DLGAP4	6.36926e-51	2.86546	0.11	0.014	8.6157e-47	AD	DLGAP4
FAM107A	6.84483e-51	0.340941	0.997	0.985	9.259e-47	AD	FAM107A
ARHGEF41	6.89921e-50	0.488236	0.917	0.894	9.33256e-46	AD	ARHGEF4
MAPK3	3.87529e-48	4.15287	0.077	0.003	5.24211e-44	AD	MAPK3
CBX6	7.11196e-46	1.19045	0.303	0.131	9.62035e-42	AD	CBX6
DEAF1	9.38858e-44	1.2954	0.26	0.104	1.26999e-39	AD	DEAF1
DPYSL21	1.22756e-43	0.288947	0.969	0.946	1.66052e-39	AD	DPYSL2
NCS1	6.93273e-43	0.563612	0.733	0.659	9.37791e-39	AD	NCS1
ZNF358	7.5502e-43	2.40183	0.105	0.017	1.02132e-38	AD	ZNF358
BRSK1	2.53293e-42	1.77643	0.138	0.032	3.4263e-38	AD	BRSK1
ARHGAP35	3.73801e-42	1.36926	0.205	0.07	5.05641e-38	AD	ARHGAP35
LRRC4B	1.28256e-41	2.00808	0.122	0.025	1.73492e-37	AD	LRRC4B
SAMD14	4.74015e-41	1.5753	0.179	0.056	6.412e-37	AD	SAMD14
ATXN1	6.13947e-41	2.02968	0.114	0.022	8.30486e-37	AD	ATXN1
EEF2	4.50722e-40	1.23981	0.241	0.096	6.09692e-36	AD	EEF2
FBXL16	6.92771e-40	1.64092	0.148	0.039	9.37111e-36	AD	FBXL16
KIAA1671	1.42536e-39	1.31923	0.238	0.095	1.92808e-35	AD	KIAA1671
SHANK1	2.25404e-38	3.36232	0.068	0.005	3.04904e-34	AD	SHANK1
CAMK2A	4.0894e-38	1.22129	0.263	0.117	5.53174e-34	AD	CAMK2A
UGP2	3.82559e-36	0.988615	0.323	0.161	5.17487e-32	AD	UGP2
RGMA	3.87564e-35	0.73067	0.583	0.404	5.24257e-31	AD	RGMA
PFKL	5.77563e-35	1.12194	0.248	0.108	7.8127e-31	AD	PFKL
CA11	6.64785e-35	1.39857	0.172	0.059	8.99255e-31	AD	CA11
TMCC2	6.38298e-34	1.46323	0.164	0.055	8.63426e-30	AD	TMCC2
PI4KA	9.13247e-34	1.06139	0.263	0.12	1.23535e-29	AD	PI4KA
SPECC1	2.95979e-33	1.06138	0.227	0.096	4.0037e-29	AD	SPECC1
RNF208	4.75875e-33	1.73057	0.106	0.024	6.43717e-29	AD	RNF208
ULK1	5.03139e-33	1.57393	0.126	0.035	6.80596e-29	AD	ULK1
SH3RF1	1.05166e-31	1.81734	0.089	0.017	1.42258e-27	AD	SH3RF1
AGAP2	1.1004e-31	4.07624	0.054	0.003	1.48852e-27	AD	AGAP2
SOWAHA	1.35376e-31	3.172	0.059	0.005	1.83123e-27	AD	SOWAHA
DVL1	1.55978e-31	1.73346	0.111	0.029	2.10992e-27	AD	DVL1
NTNG2	4.40098e-31	1.17935	0.188	0.074	5.95321e-27	AD	NTNG2
GFAP	1.61481e-30	0.224134	1	0.997	2.18435e-26	AD	GFAP
CSNK1G2	2.59433e-30	1.61995	0.113	0.031	3.50935e-26	AD	CSNK1G2
CHN1	6.83788e-30	0.336409	0.956	0.851	9.2496e-26	AD	CHN1
CTNND2	4.62278e-29	0.617107	0.595	0.451	6.25324e-25	AD	CTNND2
PHACTR1	6.9761e-29	2.07568	0.083	0.017	9.43658e-25	AD	PHACTR1
PPP3CB	8.17475e-29	1.15822	0.186	0.076	1.1058e-24	AD	PPP3CB
ZNF219	1.21948e-28	2.51103	0.065	0.009	1.64959e-24	AD	ZNF219
MLLT6	1.3887e-28	1.94437	0.078	0.015	1.8785e-24	AD	MLLT6
SLC25A23	1.50935e-28	0.736101	0.429	0.274	2.0417e-24	AD	SLC25A23
PACS2	1.82762e-28	1.07626	0.186	0.075	2.47222e-24	AD	PACS2
ZMIZ2	2.08506e-28	0.809178	0.254	0.119	2.82047e-24	AD	ZMIZ2
CEP170B	9.89584e-28	2.1702	0.068	0.011	1.33861e-23	AD	CEP170B
CAMTA2	3.08658e-27	2.12323	0.075	0.015	4.17522e-23	AD	CAMTA2
DACT3	4.90028e-27	1.93678	0.075	0.015	6.62861e-23	AD	DACT3
CASKIN1	9.38823e-27	1.01623	0.202	0.089	1.26995e-22	AD	CASKIN1
PRRC2A	8.66373e-26	1.72476	0.089	0.022	1.17194e-21	AD	PRRC2A
GNG7	1.03617e-25	1.0353	0.155	0.059	1.40162e-21	AD	GNG7
NLGN2	1.79163e-25	1.2731	0.134	0.048	2.42354e-21	AD	NLGN2
SYNGAP1	2.90297e-25	0.704711	0.297	0.159	3.92685e-21	AD	SYNGAP1
BAP1	3.51668e-25	4.00744	0.039	0.002	4.75702e-21	AD	BAP1
EPN1	5.08825e-25	1.79244	0.082	0.019	6.88288e-21	AD	EPN1
ABR1	5.2352e-25	0.369251	0.799	0.718	7.08166e-21	AD	ABR
LMO4	8.33562e-25	0.84838	0.296	0.164	1.12756e-20	AD	LMO4
MAPK8IP3	1.93708e-24	1.16437	0.139	0.052	2.62029e-20	AD	MAPK8IP3
RUNDC3A	9.96086e-24	1.13105	0.141	0.054	1.34741e-19	AD	RUNDC3A
WSB2	1.05974e-23	1.13819	0.136	0.051	1.43351e-19	AD	WSB2
TOM1L2	1.3925e-23	0.898195	0.239	0.122	1.88363e-19	AD	TOM1L2
DOCK4	1.56751e-23	0.699772	0.364	0.22	2.12037e-19	AD	DOCK4
PPP6R1	2.51935e-23	2.54908	0.051	0.007	3.40792e-19	AD	PPP6R1
FBXW5	3.09953e-23	2.46226	0.055	0.009	4.19273e-19	AD	FBXW5
NFIC	3.11788e-23	1.22957	0.14	0.055	4.21756e-19	AD	NFIC
PRICKLE2	3.84617e-23	1.9634	0.076	0.018	5.20271e-19	AD	PRICKLE2
KCNAB2	3.97079e-23	2.83209	0.047	0.005	5.37128e-19	AD	KCNAB2
ZBTB7A	4.16901e-23	0.802822	0.222	0.109	5.63942e-19	AD	ZBTB7A
CTBP1	5.45728e-23	1.06821	0.141	0.055	7.38206e-19	AD	CTBP1
PLEKHM2	8.97931e-23	2.25401	0.061	0.011	1.21463e-18	AD	PLEKHM2
C11orf95	1.00398e-22	1.97872	0.07	0.015	1.35809e-18	AD	C11orf95
SERPINA5	1.34057e-22	2.84641	0.066	0.014	1.8134e-18	AD	SERPINA5
C14orf132	1.41458e-22	0.787231	0.265	0.143	1.9135e-18	AD	C14orf132
KIF3C	1.51945e-22	1.57741	0.088	0.025	2.05537e-18	AD	KIF3C
CCDC106	4.60727e-22	1.48721	0.085	0.024	6.23226e-18	AD	CCDC106
NRXN2	4.64445e-22	1.5187	0.09	0.027	6.28255e-18	AD	NRXN2
CYFIP2	1.48963e-21	0.548424	0.406	0.256	2.01502e-17	AD	CYFIP2
ACAP3	2.75259e-21	1.69348	0.062	0.013	3.72343e-17	AD	ACAP3
SDC3	3.98533e-21	1.19959	0.129	0.051	5.39095e-17	AD	SDC3
NCOR2	5.64448e-21	1.89617	0.064	0.014	7.63529e-17	AD	NCOR2
METRN	5.72828e-21	0.784162	0.21	0.105	7.74864e-17	AD	METRN
SMARCC2	6.63718e-21	1.33476	0.085	0.025	8.97812e-17	AD	SMARCC2
PSD	7.17271e-21	0.777336	0.199	0.096	9.70252e-17	AD	PSD
MAP1A	1.69148e-20	0.618463	0.453	0.324	2.28806e-16	AD	MAP1A
SELENOW	1.83556e-20	0.717234	0.324	0.198	2.48296e-16	AD	SELENOW
NPDC1	2.98807e-20	1.85282	0.062	0.014	4.04196e-16	AD	NPDC1
ITPK1	3.36374e-20	0.784627	0.227	0.119	4.55013e-16	AD	ITPK1
PTPA	4.24492e-20	0.74242	0.225	0.117	5.7421e-16	AD	PTPA
TUBG2	9.50176e-20	1.60824	0.075	0.021	1.2853e-15	AD	TUBG2
CTXND1	2.03879e-19	1.04457	0.11	0.041	2.75787e-15	AD	CTXND1
TNK2	3.70209e-19	3.56202	0.031	0.002	5.00781e-15	AD	TNK2
RNF157	3.82747e-19	1.47493	0.072	0.02	5.17742e-15	AD	RNF157
EVL	4.12526e-19	2.56562	0.04	0.005	5.58024e-15	AD	EVL
DLG4	6.30939e-19	0.568064	0.45	0.324	8.53471e-15	AD	DLG4
PFKP	1.20595e-18	0.319199	0.897	0.824	1.63129e-14	AD	PFKP
MLLT1	1.62734e-18	6.04015	0.025	0	2.20131e-14	AD	MLLT1
TTC7B	1.88632e-18	0.889415	0.136	0.059	2.55163e-14	AD	TTC7B
TCP11L1	2.19467e-18	2.22893	0.052	0.011	2.96873e-14	AD	TCP11L1
SNPH	2.19714e-18	0.619764	0.222	0.117	2.97207e-14	AD	SNPH
TP53INP2	3.23771e-18	1.87548	0.059	0.014	4.37964e-14	AD	TP53INP2
CMTM4	3.45706e-18	0.868657	0.203	0.108	4.67636e-14	AD	CMTM4
SAMD1	3.49523e-18	3.01531	0.037	0.004	4.728e-14	AD	SAMD1
RGCC	3.96303e-18	1.38785	0.082	0.027	5.36078e-14	AD	RGCC
PLPPR2	4.52059e-18	0.618685	0.206	0.107	6.115e-14	AD	PLPPR2
PPP2R5C	4.75091e-18	0.767084	0.18	0.09	6.42655e-14	AD	PPP2R5C
AMPD2	5.58983e-18	2.21362	0.044	0.007	7.56136e-14	AD	AMPD2
CCND3	5.79777e-18	1.46397	0.068	0.019	7.84264e-14	AD	CCND3
ZBTB4	6.73365e-18	1.30963	0.08	0.026	9.10861e-14	AD	ZBTB4
RABL6	8.42134e-18	0.980871	0.126	0.054	1.13916e-13	AD	RABL6
SPTBN1	9.24942e-18	0.643428	0.237	0.131	1.25117e-13	AD	SPTBN1
ABAT	1.03064e-17	0.700402	0.193	0.099	1.39415e-13	AD	ABAT
DDN	1.10521e-17	2.50179	0.039	0.006	1.49502e-13	AD	DDN
CTXN1	1.13189e-17	0.600812	0.375	0.256	1.53111e-13	AD	CTXN1
ANKRD13D	1.75399e-17	2.2974	0.04	0.006	2.37262e-13	AD	ANKRD13D
C1orf21	1.75408e-17	0.592863	0.336	0.214	2.37274e-13	AD	C1orf21
WDTC1	1.82768e-17	1.34265	0.071	0.021	2.47231e-13	AD	WDTC1
NWD1	2.24297e-17	1.08337	0.141	0.066	3.03406e-13	AD	NWD1
KCNN1	2.85204e-17	0.854031	0.141	0.065	3.85796e-13	AD	KCNN1
TADA3	2.93724e-17	1.30641	0.091	0.033	3.9732e-13	AD	TADA3
SUPT5H	3.23436e-17	0.731353	0.172	0.086	4.37512e-13	AD	SUPT5H
PPP1R9B	5.46806e-17	0.481318	0.536	0.417	7.39664e-13	AD	PPP1R9B
MAP3K10	5.89178e-17	1.46001	0.06	0.015	7.96981e-13	AD	MAP3K10
AJM1	6.38668e-17	1.22148	0.087	0.031	8.63926e-13	AD	AJM1
SYNE1	6.77799e-17	0.902905	0.134	0.061	9.16859e-13	AD	SYNE1
DCTN1	8.63119e-17	0.81549	0.148	0.071	1.16754e-12	AD	DCTN1
SAMD4B	8.70175e-17	1.41213	0.063	0.017	1.17709e-12	AD	SAMD4B
SERGEF	1.03085e-16	1.17163	0.092	0.034	1.39444e-12	AD	SERGEF
DTX3	1.06499e-16	0.838381	0.19	0.101	1.44061e-12	AD	DTX3
PTMS	1.30441e-16	0.685332	0.208	0.113	1.76448e-12	AD	PTMS
TXNIP	1.33215e-16	2.14015	0.047	0.01	1.802e-12	AD	TXNIP
ARRB1	1.42614e-16	0.705672	0.222	0.126	1.92914e-12	AD	ARRB1
NF2	1.53795e-16	1.76035	0.057	0.015	2.08039e-12	AD	NF2
DAB2IP	1.56511e-16	2.51501	0.037	0.006	2.11713e-12	AD	DAB2IP
CBSL	1.57624e-16	1.71341	0.057	0.015	2.13218e-12	AD	CBSL
ZCCHC24	1.70127e-16	1.44956	0.062	0.017	2.3013e-12	AD	ZCCHC24
CCM2	2.40842e-16	2.46445	0.035	0.005	3.25787e-12	AD	CCM2
TRAF3	3.8121e-16	1.60552	0.059	0.016	5.15663e-12	AD	TRAF3
TNS1	3.84967e-16	3.11332	0.029	0.002	5.20745e-12	AD	TNS1
BTBD3	3.87432e-16	1.78327	0.05	0.012	5.24079e-12	AD	BTBD3
FAM102A	4.39471e-16	0.709942	0.198	0.107	5.94472e-12	AD	FAM102A
PHYHD1	5.69054e-16	0.653312	0.351	0.241	7.6976e-12	AD	PHYHD1
PIP5K1C	6.20238e-16	3.99905	0.026	0.002	8.38996e-12	AD	PIP5K1C
UBXN6	6.49277e-16	0.69845	0.192	0.103	8.78277e-12	AD	UBXN6
GSTM3	7.81023e-16	0.85958	0.177	0.094	1.05649e-11	AD	GSTM3
MAFG	1.47028e-15	0.820643	0.107	0.045	1.98885e-11	AD	MAFG
SLC48A1	1.51869e-15	0.76875	0.187	0.101	2.05434e-11	AD	SLC48A1
HTT	1.58871e-15	1.43119	0.068	0.022	2.14904e-11	AD	HTT
FRA10AC1	1.60296e-15	2.0152	0.044	0.009	2.16832e-11	AD	FRA10AC1
GABBR1	2.07494e-15	0.311008	0.746	0.722	2.80677e-11	AD	GABBR1
C1orf122	2.49842e-15	0.699609	0.197	0.109	3.37961e-11	AD	C1orf122
MAP2K2	3.1474e-15	1.14762	0.072	0.024	4.25749e-11	AD	MAP2K2
SPHK2	3.82867e-15	1.41374	0.057	0.016	5.17904e-11	AD	SPHK2
PRKCA	3.87942e-15	0.690124	0.185	0.101	5.24769e-11	AD	PRKCA
DYNC1H1	3.92327e-15	0.823086	0.141	0.069	5.30701e-11	AD	DYNC1H1
ABHD12	4.47557e-15	1.57031	0.061	0.018	6.0541e-11	AD	ABHD12
TMEM8B	4.51731e-15	1.61273	0.054	0.015	6.11056e-11	AD	TMEM8B
KIF21B	4.6342e-15	1.71767	0.051	0.013	6.26868e-11	AD	KIF21B
VPS53	5.36555e-15	0.892318	0.127	0.059	7.25799e-11	AD	VPS53
PDXP	7.16987e-15	2.45958	0.035	0.006	9.69868e-11	AD	PDXP
KCNQ2	7.87614e-15	3.01594	0.029	0.003	1.06541e-10	AD	KCNQ2
BRD2	8.20469e-15	0.854876	0.126	0.059	1.10985e-10	AD	BRD2
SLC35E2B	9.38365e-15	1.52374	0.052	0.014	1.26933e-10	AD	SLC35E2B
MAPRE3	1.00216e-14	0.722658	0.233	0.141	1.35562e-10	AD	MAPRE3
TFPT	1.08304e-14	2.79613	0.03	0.004	1.46503e-10	AD	TFPT
PLCE1	1.36012e-14	1.39566	0.077	0.028	1.83983e-10	AD	PLCE1
KAT6B	1.48092e-14	0.797372	0.126	0.059	2.00324e-10	AD	KAT6B
DNAJC5	3.43415e-14	1.10039	0.071	0.025	4.64537e-10	AD	DNAJC5
SCAF1	3.9633e-14	1.80961	0.039	0.008	5.36116e-10	AD	SCAF1
ECHS1	5.17539e-14	0.870813	0.115	0.053	7.00075e-10	AD	ECHS1
ZNF609	8.09554e-14	0.593385	0.184	0.102	1.09508e-09	AD	ZNF609
AP3D1	8.58936e-14	0.669685	0.177	0.098	1.16188e-09	AD	AP3D1
MT1E1	1.28298e-13	0.298121	0.95	0.929	1.73549e-09	AD	MT1E
ABHD17C	1.40717e-13	2.1832	0.035	0.007	1.90347e-09	AD	ABHD17C
CCND2	1.87057e-13	1.40996	0.05	0.014	2.53033e-09	AD	CCND2
WNK2	1.88036e-13	1.1199	0.077	0.03	2.54356e-09	AD	WNK2
NYAP1	1.95e-13	0.61484	0.253	0.16	2.63776e-09	AD	NYAP1
GPR137	2.07528e-13	1.87875	0.038	0.008	2.80723e-09	AD	GPR137
KLHDC3	2.17805e-13	2.33981	0.032	0.006	2.94625e-09	AD	KLHDC3
SKI	2.32814e-13	1.72978	0.039	0.009	3.14928e-09	AD	SKI
TRIM2	2.6712e-13	0.397958	0.496	0.368	3.61333e-09	AD	TRIM2
GNB1	2.94369e-13	0.431294	0.344	0.232	3.98193e-09	AD	GNB1
KIF1A	4.57668e-13	0.261044	0.793	0.746	6.19087e-09	AD	KIF1A
LAMTOR1	4.7531e-13	1.45978	0.054	0.017	6.42952e-09	AD	LAMTOR1
FBXW4	5.13643e-13	0.973138	0.074	0.028	6.94804e-09	AD	FBXW4
LZTS3	6.43241e-13	0.495425	0.25	0.155	8.70112e-09	AD	LZTS3
NCKAP1	9.04735e-13	0.353491	0.669	0.544	1.22384e-08	AD	NCKAP1
YPEL3	9.71293e-13	0.727106	0.172	0.099	1.31387e-08	AD	YPEL3
RERE	9.91143e-13	0.681339	0.153	0.082	1.34072e-08	AD	RERE
MCRIP1	1.09927e-12	1.00948	0.08	0.033	1.48698e-08	AD	MCRIP1
HDGFL3	1.15012e-12	1.80613	0.041	0.01	1.55576e-08	AD	HDGFL3
NAT8L	1.24873e-12	0.34756	0.642	0.568	1.68916e-08	AD	NAT8L
MAPK8IP1	1.33815e-12	0.574019	0.159	0.087	1.81012e-08	AD	MAPK8IP1
DLG2	1.66217e-12	1.39499	0.054	0.017	2.24842e-08	AD	DLG2
OAZ2	2.34242e-12	0.723954	0.125	0.064	3.1686e-08	AD	OAZ2
CMIP	2.85324e-12	2.22054	0.03	0.005	3.85957e-08	AD	CMIP
MAP4	3.14253e-12	0.323222	0.676	0.581	4.2509e-08	AD	MAP4
CLTC	3.32715e-12	0.929156	0.105	0.05	4.50063e-08	AD	CLTC
NFIX	3.53437e-12	0.464232	0.207	0.124	4.78095e-08	AD	NFIX
HHIPL1	3.60255e-12	0.792691	0.101	0.047	4.87317e-08	AD	HHIPL1
FNDC4	3.84148e-12	0.9805	0.09	0.04	5.19637e-08	AD	FNDC4
GATAD2A	6.86825e-12	1.2205	0.057	0.02	9.29068e-08	AD	GATAD2A
TMOD2	7.34649e-12	0.457717	0.361	0.253	9.93759e-08	AD	TMOD2
ITM2C1	7.76362e-12	0.249505	0.79	0.732	1.05018e-07	AD	ITM2C
HOMER2	9.28209e-12	1.42237	0.044	0.013	1.25559e-07	AD	HOMER2
APOE1	9.91106e-12	0.102403	0.986	0.985	1.34067e-07	AD	APOE
PADI21	9.93381e-12	0.696014	0.139	0.075	1.34375e-07	AD	PADI2
MAZ	1.11134e-11	1.5923	0.041	0.011	1.50331e-07	AD	MAZ
MARF1	1.1343e-11	2.77092	0.024	0.003	1.53437e-07	AD	MARF1
MPRIP	1.15553e-11	1.24333	0.054	0.018	1.56309e-07	AD	MPRIP
NISCH	1.16207e-11	0.506324	0.166	0.094	1.57193e-07	AD	NISCH
PPP1R12C	1.16241e-11	0.470846	0.219	0.134	1.57239e-07	AD	PPP1R12C
SLC14A11	1.32469e-11	0.552762	0.315	0.223	1.79191e-07	AD	SLC14A1
CASTOR2	1.38581e-11	1.46107	0.039	0.01	1.87459e-07	AD	CASTOR2
OGFRL1	1.62595e-11	0.334451	0.628	0.512	2.19943e-07	AD	OGFRL1
ABHD8	1.93231e-11	0.545553	0.189	0.112	2.61383e-07	AD	ABHD8
PLEKHO2	2.28605e-11	0.890508	0.092	0.043	3.09234e-07	AD	PLEKHO2
DTNA	2.6429e-11	0.166851	0.974	0.959	3.57505e-07	AD	DTNA
SIPA1L3	2.68114e-11	8.46968	0.014	0	3.62678e-07	AD	SIPA1L3
APC2	2.71507e-11	0.442522	0.47	0.371	3.67267e-07	AD	APC2
MGLL	2.79933e-11	1.77003	0.035	0.009	3.78665e-07	AD	MGLL
DZIP1	2.87967e-11	1.27932	0.047	0.015	3.89533e-07	AD	DZIP1
SDCCAG8	2.93994e-11	1.61314	0.037	0.009	3.97686e-07	AD	SDCCAG8
EIF4G2	2.96787e-11	1.50596	0.045	0.014	4.01464e-07	AD	EIF4G2
TPRG1L	3.09882e-11	3.25553	0.021	0.002	4.19178e-07	AD	TPRG1L
APBA2	3.19192e-11	0.582362	0.15	0.085	4.31771e-07	AD	APBA2
LRP3	3.19955e-11	0.852818	0.059	0.022	4.32804e-07	AD	LRP3
PITPNM3	3.54243e-11	4.32063	0.017	0.001	4.79185e-07	AD	PITPNM3
AGT	3.77815e-11	0.270215	0.921	0.88	5.11071e-07	AD	AGT
BSG	3.8529e-11	0.404144	0.448	0.336	5.21181e-07	AD	BSG
TCEA2	4.44069e-11	2.60471	0.024	0.004	6.00691e-07	AD	TCEA2
DAAM2	4.7003e-11	0.647308	0.186	0.113	6.3581e-07	AD	DAAM2
NDRG21	4.94073e-11	0.134448	0.993	0.998	6.68333e-07	AD	NDRG2
USF2	5.67704e-11	0.44748	0.319	0.22	7.67933e-07	AD	USF2
SYT17	6.29971e-11	0.679552	0.197	0.123	8.52162e-07	AD	SYT17
DENND1A	6.52628e-11	1.64597	0.034	0.008	8.8281e-07	AD	DENND1A
POU3F3	6.75516e-11	0.744602	0.108	0.055	9.13771e-07	AD	POU3F3
MAP7D1	7.20888e-11	0.772851	0.1	0.049	9.75145e-07	AD	MAP7D1
DMWD	7.6973e-11	1.20777	0.044	0.014	1.04121e-06	AD	DMWD
ARHGDIA	8.22563e-11	1.5848	0.041	0.012	1.11268e-06	AD	ARHGDIA
GNA11	8.32632e-11	2.98969	0.02	0.002	1.1263e-06	AD	GNA11
PALM	1.02422e-10	0.350974	0.579	0.517	1.38546e-06	AD	PALM
ZFP36L2	1.03744e-10	0.997344	0.083	0.038	1.40335e-06	AD	ZFP36L2
FGD4	1.05711e-10	0.855064	0.076	0.033	1.42995e-06	AD	FGD4
TJP1	1.16337e-10	0.619657	0.115	0.06	1.57369e-06	AD	TJP1
ACTR1B	1.32973e-10	0.982591	0.073	0.032	1.79872e-06	AD	ACTR1B
TMEM129	1.35463e-10	1.26841	0.038	0.011	1.83241e-06	AD	TMEM129
FXR2	1.38734e-10	1.72712	0.034	0.008	1.87665e-06	AD	FXR2
STUB1	1.62267e-10	1.03123	0.073	0.032	2.19498e-06	AD	STUB1
SPARC1	1.89736e-10	0.370883	0.531	0.432	2.56656e-06	AD	SPARC
ZFR	2.09247e-10	1.04742	0.065	0.027	2.83048e-06	AD	ZFR
TRIM8	2.51184e-10	0.440329	0.38	0.283	3.39777e-06	AD	TRIM8
MAPKAP1	2.63552e-10	1.9592	0.029	0.006	3.56506e-06	AD	MAPKAP1
NCK2	2.70393e-10	2.06699	0.031	0.007	3.6576e-06	AD	NCK2
RIN2	2.77907e-10	3.03566	0.017	0.002	3.75924e-06	AD	RIN2
DYRK1A	2.82825e-10	2.40464	0.023	0.004	3.82578e-06	AD	DYRK1A
ARF1	3.95218e-10	1.2605	0.051	0.019	5.34612e-06	AD	ARF1
FASN	4.00993e-10	0.648355	0.084	0.039	5.42423e-06	AD	FASN
ARHGAP21	4.36246e-10	0.729557	0.124	0.068	5.9011e-06	AD	ARHGAP21
FAM171A1	4.52101e-10	0.432165	0.344	0.25	6.11556e-06	AD	FAM171A1
HPSE2	4.87152e-10	0.617381	0.147	0.086	6.58971e-06	AD	HPSE2
ANKRD11	5.90183e-10	1.139	0.055	0.021	7.9834e-06	AD	ANKRD11
FAM53C	6.15075e-10	1.85378	0.032	0.008	8.32011e-06	AD	FAM53C
PPP1R1B	6.52067e-10	0.218023	0.75	0.696	8.82051e-06	AD	PPP1R1B
GPX4	7.44304e-10	0.386055	0.384	0.282	1.00682e-05	AD	GPX4
PANX2	8.07476e-10	2.28229	0.023	0.004	1.09227e-05	AD	PANX2
ANKRD9	8.96012e-10	0.498388	0.228	0.153	1.21204e-05	AD	ANKRD9
EVI5L	9.0629e-10	2.20704	0.024	0.004	1.22594e-05	AD	EVI5L
TRIM44	9.45337e-10	1.35322	0.042	0.014	1.27876e-05	AD	TRIM44
LRRC8A	1.07192e-09	0.799181	0.091	0.046	1.44999e-05	AD	LRRC8A
GRAMD1B	1.15415e-09	1.04427	0.063	0.027	1.56122e-05	AD	GRAMD1B
DVL3	1.2518e-09	2.24442	0.021	0.003	1.6933e-05	AD	DVL3
TTC3	1.26493e-09	0.388113	0.344	0.246	1.71107e-05	AD	TTC3
TNS2	1.2818e-09	1.89541	0.026	0.006	1.73389e-05	AD	TNS2
SMARCA4	1.3122e-09	1.87185	0.026	0.006	1.77502e-05	AD	SMARCA4
GPAA1	1.46939e-09	1.39122	0.032	0.009	1.98764e-05	AD	GPAA1
RAB11FIP3	1.54306e-09	0.586781	0.109	0.058	2.0873e-05	AD	RAB11FIP3
TBL1XR1	1.64117e-09	1.72005	0.037	0.011	2.22002e-05	AD	TBL1XR1
GOLGB1	1.86516e-09	0.827971	0.077	0.036	2.523e-05	AD	GOLGB1
KLF15	2.08399e-09	0.657835	0.123	0.069	2.81902e-05	AD	KLF15
SMOX	2.18523e-09	0.447123	0.227	0.152	2.95596e-05	AD	SMOX
TRIR	2.39178e-09	1.51442	0.034	0.01	3.23536e-05	AD	TRIR
ANKRD40	2.48718e-09	2.44188	0.019	0.003	3.36441e-05	AD	ANKRD40
ZBTB18	2.51746e-09	0.835009	0.088	0.044	3.40537e-05	AD	ZBTB18
KIAA0513	3e-09	1.83307	0.026	0.006	4.05809e-05	AD	KIAA0513
RAB11B	3.73424e-09	1.53183	0.036	0.011	5.05131e-05	AD	RAB11B
TAF6	4.00953e-09	2.30268	0.017	0.002	5.42369e-05	AD	TAF6
HDLBP	4.24926e-09	0.477111	0.151	0.09	5.74797e-05	AD	HDLBP
FOXK1	4.2799e-09	2.17584	0.021	0.004	5.78942e-05	AD	FOXK1
UBQLN1	5.14981e-09	0.654933	0.089	0.045	6.96615e-05	AD	UBQLN1
ATP13A2	5.28549e-09	2.77028	0.016	0.002	7.14968e-05	AD	ATP13A2
TAOK2	5.42209e-09	1.39326	0.033	0.01	7.33447e-05	AD	TAOK2
CASTOR3	6.05792e-09	1.15263	0.052	0.021	8.19455e-05	AD	CASTOR3
PURA	6.88384e-09	1.82474	0.026	0.006	9.31177e-05	AD	PURA
ALKBH5	7.28905e-09	0.906476	0.059	0.025	9.8599e-05	AD	ALKBH5
NUDCD3	8.6165e-09	0.706785	0.103	0.057	0.000116555	AD	NUDCD3
BCR	8.63833e-09	0.344966	0.346	0.253	0.000116851	AD	BCR
PPP1R7	8.67734e-09	0.887762	0.056	0.024	0.000117378	AD	PPP1R7
HSPA2	8.69388e-09	0.900223	0.078	0.038	0.000117602	AD	HSPA2
CCDC85C	8.92052e-09	0.589808	0.093	0.049	0.000120668	AD	CCDC85C
CAMK2G	1.16823e-08	0.434615	0.392	0.302	0.000158026	AD	CAMK2G
CHDH	1.22149e-08	1.47156	0.031	0.009	0.000165231	AD	CHDH
FLOT1	1.2217e-08	0.68336	0.132	0.079	0.000165259	AD	FLOT1
NCOA1	1.27949e-08	0.734032	0.088	0.046	0.000173077	AD	NCOA1
RNF187	1.3039e-08	0.403079	0.202	0.132	0.000176378	AD	RNF187
CLASP2	1.33412e-08	1.01626	0.054	0.022	0.000180467	AD	CLASP2
STRN4	1.35684e-08	7.92554	0.01	0	0.000183539	AD	STRN4
PDXK	1.4008e-08	1.95504	0.023	0.005	0.000189487	AD	PDXK
APBB1	1.41337e-08	0.897354	0.059	0.026	0.000191186	AD	APBB1
NUMA1	1.64392e-08	0.780499	0.08	0.041	0.000222373	AD	NUMA1
VPS26B	1.71218e-08	0.861444	0.057	0.024	0.000231607	AD	VPS26B
KIF5B	1.73036e-08	1.10283	0.042	0.015	0.000234065	AD	KIF5B
CRIP2	1.93011e-08	2.74579	0.016	0.002	0.000261086	AD	CRIP2
PSMD2	2.19781e-08	2.10055	0.019	0.003	0.000297298	AD	PSMD2
MXD4	2.37054e-08	1.19398	0.047	0.019	0.000320662	AD	MXD4
TAF15	2.47211e-08	0.479434	0.123	0.072	0.000334402	AD	TAF15
MGAT4B	2.47224e-08	3.11822	0.014	0.001	0.00033442	AD	MGAT4B
MEGF9	2.47916e-08	0.681246	0.119	0.07	0.000335356	AD	MEGF9
PABPC4	2.5144e-08	2.78106	0.016	0.002	0.000340122	AD	PABPC4
DBNDD1	2.53208e-08	1.16718	0.032	0.01	0.000342514	AD	DBNDD1
FJX1	2.59557e-08	1.84254	0.038	0.013	0.000351103	AD	FJX1
AGPAT3	2.80657e-08	0.793367	0.073	0.036	0.000379644	AD	AGPAT3
WIPI2	2.89685e-08	1.06752	0.042	0.015	0.000391857	AD	WIPI2
B4GALT2	2.97675e-08	2.04503	0.022	0.005	0.000402665	AD	B4GALT2
ENHO1	3.21388e-08	0.297376	0.558	0.488	0.000434741	AD	ENHO
KPNA4	3.35691e-08	0.911995	0.066	0.031	0.00045409	AD	KPNA4
C31	3.41257e-08	0.650029	0.086	0.045	0.000461618	AD	C3
NEK6	3.88399e-08	0.70067	0.125	0.075	0.000525388	AD	NEK6
PCDH10	4.29963e-08	1.19373	0.032	0.01	0.000581611	AD	PCDH10
LDB1	4.34064e-08	1.07113	0.047	0.019	0.000587159	AD	LDB1
AKAP11	4.35844e-08	0.624653	0.141	0.088	0.000589566	AD	AKAP11
VSIR	4.52728e-08	0.938059	0.06	0.028	0.000612405	AD	VSIR
UBE2I	4.77694e-08	0.830901	0.085	0.046	0.000646177	AD	UBE2I
INF2	5.26906e-08	1.98714	0.019	0.003	0.000712745	AD	INF2
TNRC6A	5.51404e-08	0.721296	0.08	0.042	0.000745884	AD	TNRC6A
RUSC2	5.66301e-08	2.08725	0.019	0.004	0.000766035	AD	RUSC2
SELENBP1	5.75844e-08	0.481804	0.187	0.125	0.000778945	AD	SELENBP1
POM121	5.97636e-08	1.68455	0.019	0.004	0.000808423	AD	POM121
PNPLA2	5.98125e-08	0.954554	0.046	0.019	0.000809084	AD	PNPLA2
TRAK1	6.0214e-08	0.427006	0.2	0.135	0.000814515	AD	TRAK1
CDC42BPB	6.38832e-08	0.835897	0.068	0.033	0.000864149	AD	CDC42BPB
DBNL	7.07313e-08	1.93252	0.021	0.005	0.000956783	AD	DBNL
ZHX3	7.15002e-08	0.457931	0.174	0.114	0.000967183	AD	ZHX3
NDST1	7.69334e-08	1.42428	0.032	0.01	0.00104068	AD	NDST1
HSPB81	7.7669e-08	0.27775	0.587	0.523	0.00105063	AD	HSPB8
C2orf74	7.99376e-08	1.12854	0.052	0.023	0.00108132	AD	C2orf74
STK11	8.00518e-08	1.12573	0.026	0.007	0.00108286	AD	STK11
FAM181B	8.46587e-08	0.529809	0.191	0.13	0.00114518	AD	FAM181B
SETD3	8.95238e-08	0.401226	0.128	0.077	0.00121099	AD	SETD3
ALDOC	9.28285e-08	2.60388	0.017	0.003	0.00125569	AD	ALDOC
CNP	9.60883e-08	1.2785	0.031	0.01	0.00129979	AD	CNP
KCTD13	9.94108e-08	0.344655	0.184	0.122	0.00134473	AD	KCTD13
PREX1	1.01359e-07	0.567859	0.099	0.056	0.00137109	AD	PREX1
MFHAS1	1.08983e-07	0.856094	0.065	0.032	0.00147421	AD	MFHAS1
DEF8	1.11843e-07	0.940291	0.062	0.029	0.0015129	AD	DEF8
REEP2	1.16643e-07	0.360744	0.16	0.102	0.00157783	AD	REEP2
EFR3B	1.18727e-07	0.38251	0.169	0.111	0.00160602	AD	EFR3B
ACTA2	1.23691e-07	2.12187	0.018	0.003	0.00167316	AD	ACTA2
ITGB5	1.37162e-07	1.26232	0.035	0.013	0.0018554	AD	ITGB5
NDUFS1	1.4062e-07	0.824751	0.05	0.022	0.00190217	AD	NDUFS1
TNPO2	1.4172e-07	0.72787	0.073	0.038	0.00191704	AD	TNPO2
THOC7	1.43856e-07	0.678912	0.095	0.054	0.00194594	AD	THOC7
PDPK1	1.47046e-07	1.08691	0.032	0.011	0.00198909	AD	PDPK1
FARP1	1.47753e-07	0.339542	0.352	0.271	0.00199866	AD	FARP1
JDP2	1.58067e-07	0.930485	0.067	0.033	0.00213817	AD	JDP2
BHLHE41	1.60729e-07	1.39954	0.024	0.007	0.00217418	AD	BHLHE41
MT1F	1.61025e-07	0.409684	0.451	0.38	0.00217819	AD	MT1F
PKD1	1.63772e-07	0.383181	0.166	0.107	0.00221535	AD	PKD1
MTA1	1.73355e-07	0.973058	0.049	0.021	0.00234498	AD	MTA1
TRIP6	1.74095e-07	1.19585	0.031	0.01	0.00235498	AD	TRIP6
MARCKSL1	1.74419e-07	1.18227	0.031	0.01	0.00235937	AD	MARCKSL1
KIF1C	1.80843e-07	0.790258	0.053	0.024	0.00244627	AD	KIF1C
TOLLIP	1.83126e-07	0.463912	0.106	0.062	0.00247714	AD	TOLLIP
CDC42EP4	2.03e-07	0.472928	0.197	0.137	0.00274598	AD	CDC42EP4
HDAC5	2.1156e-07	1.23648	0.033	0.011	0.00286178	AD	HDAC5
PFDN1	2.18701e-07	1.46193	0.029	0.009	0.00295837	AD	PFDN1
KIFC2	2.25538e-07	0.46306	0.097	0.055	0.00305086	AD	KIFC2
WAC	2.44799e-07	0.590817	0.085	0.047	0.0033114	AD	WAC
FAM168B	2.5808e-07	1.52319	0.027	0.008	0.00349105	AD	FAM168B
WDFY3	2.70989e-07	1.07847	0.044	0.019	0.00366566	AD	WDFY3
NACC2	2.90931e-07	0.683239	0.068	0.034	0.00393542	AD	NACC2
ZBTB44	3.08053e-07	3.83983	0.011	0.001	0.00416704	AD	ZBTB44
DCAF11	3.11523e-07	3.39825	0.011	0.001	0.00421397	AD	DCAF11
VIM	3.2052e-07	0.402028	0.196	0.134	0.00433567	AD	VIM
NACC1	3.23755e-07	1.57244	0.024	0.007	0.00437944	AD	NACC1
GATD1	3.52328e-07	0.479976	0.115	0.069	0.00476595	AD	GATD1
MED29	3.62143e-07	1.88199	0.021	0.005	0.0048987	AD	MED29
HOOK3	3.76572e-07	1.44843	0.022	0.006	0.00509389	AD	HOOK3
DCLK2	3.9299e-07	0.399282	0.216	0.153	0.00531597	AD	DCLK2
REXO1	4.12781e-07	2.52844	0.014	0.002	0.00558368	AD	REXO1
NR1H2	4.15227e-07	2.38239	0.014	0.002	0.00561677	AD	NR1H2
BEGAIN	4.29644e-07	1.13808	0.029	0.009	0.00581179	AD	BEGAIN
ZDHHC8	4.50913e-07	1.175	0.032	0.011	0.0060995	AD	ZDHHC8
FAM189B	4.67017e-07	3.23849	0.012	0.001	0.00631735	AD	FAM189B
POU6F1	4.76465e-07	0.804551	0.054	0.025	0.00644514	AD	POU6F1
SCYL1	4.83851e-07	2.6077	0.015	0.002	0.00654505	AD	SCYL1
TEX2	5.30723e-07	0.735186	0.088	0.05	0.00717909	AD	TEX2
ABCA2	5.54497e-07	0.721678	0.064	0.033	0.00750068	AD	ABCA2
CCDC92	5.59749e-07	0.529053	0.095	0.055	0.00757173	AD	CCDC92
ZBTB47	5.77786e-07	0.31266	0.326	0.245	0.00781571	AD	ZBTB47
LMTK3	5.8257e-07	0.40401	0.092	0.052	0.00788042	AD	LMTK3
HAGH	5.90186e-07	0.56237	0.157	0.105	0.00798344	AD	HAGH
PACS1	5.91173e-07	0.614978	0.115	0.071	0.0079968	AD	PACS1
RNF11	6.13225e-07	0.455051	0.142	0.091	0.0082951	AD	RNF11
SEC62	6.18676e-07	0.450944	0.11	0.066	0.00836883	AD	SEC62
ABCA3	6.24833e-07	1.49724	0.029	0.01	0.00845211	AD	ABCA3
ANP32B	6.56935e-07	2.72271	0.012	0.002	0.00888636	AD	ANP32B
PURB	6.785e-07	0.969578	0.038	0.015	0.00917808	AD	PURB
ADIRF1	6.91735e-07	0.513922	0.15	0.099	0.00935709	AD	ADIRF
ZNF385A	7.14671e-07	0.558258	0.059	0.029	0.00966736	AD	ZNF385A
SENP6	7.37415e-07	0.808544	0.054	0.025	0.00997502	AD	SENP6
TTYH3	7.70039e-07	1.06389	0.035	0.013	0.0104163	AD	TTYH3
KIAA0100	8.12156e-07	1.85205	0.019	0.005	0.010986	AD	KIAA0100
DHRS3	8.33663e-07	0.771556	0.074	0.04	0.011277	AD	DHRS3
OBSL1	8.67548e-07	0.767504	0.06	0.03	0.0117353	AD	OBSL1
CRKL	8.80654e-07	0.626223	0.064	0.033	0.0119126	AD	CRKL
MTFR1L	8.83992e-07	0.842314	0.06	0.03	0.0119578	AD	MTFR1L
TNFSF13	9.78649e-07	0.828014	0.055	0.027	0.0132382	AD	TNFSF13
MARCH2	1.02703e-06	2.62776	0.014	0.002	0.0138927	AD	MARCH2
SSBP3	1.08906e-06	0.715389	0.097	0.058	0.0147317	AD	SSBP3
MTPN	1.11494e-06	0.483104	0.097	0.057	0.0150818	AD	MTPN
SOD3	1.16064e-06	0.575957	0.08	0.044	0.0157	AD	SOD3
MEGF8	1.18894e-06	1.38779	0.025	0.008	0.0160827	AD	MEGF8
ZNF710	1.23549e-06	1.90414	0.014	0.002	0.0167124	AD	ZNF710
MFSD12	1.25586e-06	2.8305	0.011	0.001	0.016988	AD	MFSD12
HIP1R	1.263e-06	2.67161	0.011	0.001	0.0170847	AD	HIP1R
TRIM41	1.28392e-06	0.740382	0.067	0.036	0.0173675	AD	TRIM41
ARRDC4	1.28669e-06	0.930666	0.057	0.029	0.017405	AD	ARRDC4
PIP4K2B	1.3262e-06	0.562534	0.076	0.042	0.0179396	AD	PIP4K2B
TPM2	1.32797e-06	0.801577	0.037	0.015	0.0179634	AD	TPM2
KCMF1	1.35535e-06	2.39378	0.015	0.003	0.0183339	AD	KCMF1
CAPZA2	1.41832e-06	0.527083	0.212	0.155	0.0191856	AD	CAPZA2
AQP11	1.43011e-06	0.26719	0.657	0.603	0.0193451	AD	AQP1
ROM1	1.46622e-06	0.842727	0.05	0.024	0.0198336	AD	ROM1
GLUD11	1.47762e-06	0.401872	0.199	0.14	0.0199878	AD	GLUD1
PRDM16	1.47798e-06	0.598754	0.132	0.087	0.0199926	AD	PRDM16
MGRN1	1.53171e-06	0.741895	0.055	0.027	0.0207195	AD	MGRN1
MYO18A	1.57294e-06	1.55258	0.022	0.006	0.0212771	AD	MYO18A
TBC1D17	1.57355e-06	0.700139	0.043	0.019	0.0212854	AD	TBC1D17
IDH2	1.62223e-06	0.38185	0.219	0.157	0.021944	AD	IDH2
ARID1B	1.63056e-06	0.911659	0.04	0.017	0.0220565	AD	ARID1B
RNF44	1.66895e-06	1.74435	0.016	0.003	0.0225759	AD	RNF44
KBTBD11	1.69529e-06	0.693427	0.06	0.031	0.0229321	AD	KBTBD11
TNS3	1.70794e-06	2.49111	0.012	0.002	0.0231032	AD	TNS3
DYNC1LI2	1.73392e-06	0.466369	0.113	0.071	0.0234547	AD	DYNC1LI2
CREBL2	1.73736e-06	1.63804	0.02	0.005	0.0235013	AD	CREBL2
SF3B2	1.79532e-06	0.75696	0.052	0.025	0.0242853	AD	SF3B2
TTYH1	1.84026e-06	0.206174	0.689	0.653	0.0248931	AD	TTYH1
CAMK1D	1.87853e-06	1.23225	0.032	0.012	0.0254108	AD	CAMK1D
RNPS1	2.06454e-06	1.6338	0.025	0.008	0.0279271	AD	RNPS1
SPEG	2.07733e-06	0.407266	0.125	0.08	0.0281001	AD	SPEG
R3HDM2	2.12138e-06	1.47296	0.025	0.008	0.0286959	AD	R3HDM2
NBR1	2.20479e-06	1.11594	0.034	0.014	0.0298243	AD	NBR1
SLC17A7	2.37802e-06	0.386729	0.114	0.071	0.0321675	AD	SLC17A7
PC	2.46871e-06	0.698001	0.102	0.064	0.0333943	AD	PC
AHNAK	2.58515e-06	0.40186	0.124	0.08	0.0349694	AD	AHNAK
BAALC	2.61723e-06	0.264007	0.595	0.551	0.0354032	AD	BAALC
MAPK1	2.63272e-06	0.413783	0.131	0.085	0.0356127	AD	MAPK1
GRK2	2.77254e-06	0.700107	0.028	0.01	0.0375042	AD	GRK2
RHOBTB2	2.84803e-06	0.747111	0.036	0.015	0.0385253	AD	RHOBTB2
SF1	2.85724e-06	0.648087	0.051	0.025	0.0386499	AD	SF1
KANK1	2.91434e-06	1.23548	0.032	0.013	0.0394223	AD	KANK1
VEGFA	2.9826e-06	0.745689	0.084	0.049	0.0403457	AD	VEGFA
ATP2B2	3.0399e-06	0.32612	0.403	0.326	0.0411208	AD	ATP2B2
LARP1	3.12327e-06	0.581747	0.061	0.032	0.0422485	AD	LARP1
SLC35C2	3.29328e-06	0.864549	0.049	0.024	0.0445481	AD	SLC35C2
CACUL1	3.29538e-06	0.834145	0.039	0.017	0.0445765	AD	CACUL1
KCTD15	3.44363e-06	0.385578	0.074	0.042	0.046582	AD	KCTD15
KXD1	3.46645e-06	1.33654	0.029	0.011	0.0468907	AD	KXD1
BDP1	3.522e-06	2.11031	0.015	0.003	0.0476421	AD	BDP1
TK2	3.55563e-06	2.0592	0.015	0.003	0.048097	AD	TK2
MAPK9	3.63443e-06	1.69744	0.015	0.003	0.0491629	AD	MAPK9
ATP5F1D	3.67576e-06	0.378758	0.177	0.124	0.049722	AD	ATP5F1D

## Sheet: Ast_CA2
Unnamed: 0	p_val	avg_log2FC	pct.1	pct.2	p_val_adj	cluster	gene
HSPA8	3.56025e-39	0.800791	0.921	0.753	4.81596e-35	Control	HSPA8
HSP90AA1	1.96083e-35	0.485101	1	0.994	2.65242e-31	Control	HSP90AA1
MFSD11	2.64497e-35	5.67325	0.255	0.017	3.57785e-31	Control	MFSD11
CST3	2.77526e-33	0.46342	1	0.994	3.75409e-29	Control	CST3
HSPA1A	1.33185e-31	3.76094	0.257	0.028	1.8016e-27	Control	HSPA1A
HSPA1B	1.95432e-26	1.88844	0.415	0.161	2.64361e-22	Control	HSPA1B
APOE	4.61909e-23	0.49112	0.986	0.974	6.24825e-19	Control	APOE
SRSF2	1.83081e-22	6.98696	0.151	0.005	2.47654e-18	Control	SRSF2
DNAJB1	3.03445e-22	3.75777	0.177	0.015	4.1047e-18	Control	DNAJB1
CKB	1.5352e-21	0.325009	1	0.998	2.07666e-17	Control	CKB
AQP4	4.86337e-19	0.456254	1	0.997	6.57868e-15	Control	AQP4
DPYSL2	5.89429e-19	0.418819	0.984	0.946	7.9732e-15	Control	DPYSL2
GPM6A	2.15005e-18	0.543139	0.984	0.971	2.90838e-14	Control	GPM6A
MT3	4.06494e-18	0.342842	0.998	0.994	5.49865e-14	Control	MT3
ATP1B2	1.01425e-16	0.507147	0.947	0.918	1.37197e-12	Control	ATP1B2
NSMF	1.21158e-16	0.27405	0.994	0.985	1.6389e-12	Control	NSMF
LMO3	3.41707e-16	0.593251	0.807	0.717	4.62227e-12	Control	LMO3
S100A1	6.57449e-16	0.542073	0.878	0.825	8.89331e-12	Control	S100A1
SLC1A2	1.45132e-15	0.490058	0.994	0.995	1.9632e-11	Control	SLC1A2
UBC	3.32064e-15	0.165529	1	1	4.49182e-11	Control	UBC
ID2	3.92443e-15	1.23226	0.493	0.325	5.30858e-11	Control	ID2
PEBP1	7.42047e-15	0.365626	0.925	0.92	1.00377e-10	Control	PEBP1
TUBB2A	4.79598e-14	0.642755	0.713	0.643	6.48752e-10	Control	TUBB2A
ITM2C	7.21904e-13	0.495647	0.823	0.798	9.76519e-09	Control	ITM2C
UBB	2.05741e-12	1.00324	0.521	0.385	2.78306e-08	Control	UBB
PSAP	2.65283e-12	0.283163	1	1	3.58848e-08	Control	PSAP
PPP2CB	4.10201e-12	0.30192	0.988	0.988	5.54879e-08	Control	PPP2CB
COX7C	1.15007e-11	0.2981	0.939	0.938	1.55571e-07	Control	COX7C
ARHGEF4	1.46088e-11	0.383593	0.949	0.923	1.97613e-07	Control	ARHGEF4
CHN1	1.62947e-11	0.317667	0.935	0.921	2.20419e-07	Control	CHN1
ABR	3.09128e-11	0.598752	0.682	0.584	4.18157e-07	Control	ABR
FBXO2	5.1579e-09	0.777456	0.515	0.402	6.97709e-05	Control	FBXO2
ATP1A2	5.20184e-09	0.303928	0.986	0.988	7.03653e-05	Control	ATP1A2
NAT8L	2.52192e-08	0.583006	0.629	0.535	0.00034114	Control	NAT8L
GRINA	2.66356e-08	0.743054	0.542	0.451	0.0003603	Control	GRINA
VXN	4.0378e-08	0.355858	0.778	0.764	0.000546193	Control	VXN
MAPK10	4.09184e-08	0.25696	0.933	0.921	0.000553504	Control	MAPK10
PFKFB2	6.92757e-08	1.09014	0.342	0.219	0.000937092	Control	PFKFB2
DKK3	1.13187e-07	0.248621	0.992	0.994	0.00153108	Control	DKK3
C1orf61	1.34227e-07	0.32139	0.912	0.907	0.00181569	Control	C1orf61
SLC22A17	1.40125e-07	0.654507	0.578	0.518	0.00189548	Control	SLC22A17
COX4I1	1.94339e-07	0.859765	0.405	0.278	0.00262883	Control	COX4I1
DDAH1	2.75104e-07	0.515513	0.635	0.555	0.00372134	Control	DDAH1
CTNNA2	2.98282e-07	0.616514	0.576	0.485	0.00403486	Control	CTNNA2
RTN4	4.69586e-07	0.512336	0.68	0.643	0.00635209	Control	RTN4
NCAN	5.15263e-07	0.681511	0.521	0.423	0.00696996	Control	NCAN
MBP	9.70622e-07	0.397394	0.672	0.632	0.0131296	Control	MBP
MAP1B	1.45688e-06	0.179032	0.976	0.977	0.0197072	Control	MAP1B
PHGDH	2.09558e-06	1.15217	0.212	0.113	0.0283469	Control	PHGDH
CIRBP	2.31957e-06	0.513399	0.64	0.611	0.0313768	Control	CIRBP
MT1X	2.006e-93	1.93044	0.887	0.37	2.71351e-89	Part	MT1X
SPP1	1.33652e-63	11.8462	0.352	0	1.80791e-59	Part	SPP1
SERPINA3	2.73621e-60	2.69414	0.591	0.174	3.70127e-56	Part	SERPINA3
S100B	4.21371e-59	0.53773	0.998	0.983	5.69988e-55	Part	S100B
MT2A	1.2085e-36	0.669197	0.991	0.829	1.63474e-32	Part	MT2A
MT1E	2.33816e-28	0.576262	0.963	0.77	3.16283e-24	Part	MT1E
YWHAQ	3.71636e-24	1.14578	0.568	0.276	5.02712e-20	Part	YWHAQ
CALR	3.06562e-20	2.38467	0.223	0.046	4.14686e-16	Part	CALR
CRYAB	4.36928e-20	0.292168	1	0.979	5.91032e-16	Part	CRYAB
IFITM3	7.13587e-19	2.08684	0.257	0.071	9.65269e-15	Part	IFITM3
OLFM1	8.22594e-18	0.728689	0.687	0.42	1.11272e-13	Part	OLFM1
NCAM1	1.09575e-15	0.659481	0.69	0.44	1.48222e-11	Part	NCAM1
APP	2.22262e-15	0.619146	0.706	0.44	3.00654e-11	Part	APP
ACTB	3.97002e-15	0.232344	1	1	5.37024e-11	Part	ACTB
PPDPF	8.77842e-15	1.38535	0.285	0.104	1.18746e-10	Part	PPDPF
CD44	2.47504e-13	0.771859	0.586	0.381	3.34799e-09	Part	CD44
RHBDD2	6.6039e-13	0.857182	0.444	0.235	8.93309e-09	Part	RHBDD2
DPP10	8.45133e-13	3.17812	0.103	0.011	1.14321e-08	Part	DPP10
ATP6V1B2	3.38942e-12	0.902162	0.386	0.191	4.58487e-08	Part	ATP6V1B2
TMBIM6	5.73753e-12	0.481752	0.772	0.531	7.76116e-08	Part	TMBIM6
SLC14A1	8.62369e-12	0.806777	0.411	0.216	1.16653e-07	Part	SLC14A1
CLU	6.47877e-11	0.121089	1	1	8.76384e-07	Part	CLU
EIF4A1	1.03534e-10	1.86839	0.159	0.047	1.4005e-06	Part	EIF4A1
CANX	1.2395e-10	1.14013	0.303	0.148	1.67667e-06	Part	CANX
MGST1	2.06451e-10	0.540395	0.598	0.397	2.79266e-06	Part	MGST1
PABPC1	2.13138e-10	1.10398	0.31	0.156	2.88312e-06	Part	PABPC1
MRO	2.20796e-10	0.882414	0.389	0.216	2.9867e-06	Part	MRO
YWHAG	3.86407e-10	0.48713	0.699	0.479	5.22693e-06	Part	YWHAG
CD63	5.60763e-10	0.835135	0.386	0.213	7.58544e-06	Part	CD63
NPTXR	5.61418e-10	1.38218	0.211	0.084	7.5943e-06	Part	NPTXR
FTL	6.0004e-10	0.277744	0.975	0.957	8.11675e-06	Part	FTL
HTRA1	1.68529e-09	1.22686	0.267	0.132	2.27969e-05	Part	HTRA1
GABARAP	2.52783e-09	1.07411	0.278	0.137	3.4194e-05	Part	GABARAP
ATP5IF1	5.55114e-09	0.667443	0.476	0.313	7.50903e-05	Part	ATP5IF1
ATP1B1	5.57061e-09	0.778131	0.393	0.228	7.53536e-05	Part	ATP1B1
UCHL1	6.69665e-09	0.515532	0.614	0.43	9.05855e-05	Part	UCHL1
HILPDA	7.99228e-09	1.48222	0.154	0.053	0.000108112	Part	HILPDA
EID1	8.02941e-09	0.716895	0.398	0.238	0.000108614	Part	EID1
SLC1A3	1.40847e-08	0.293813	0.995	0.963	0.000190523	Part	SLC1A3
MDH1	1.45509e-08	0.794916	0.31	0.164	0.00019683	Part	MDH1
COX5A	1.85929e-08	0.657155	0.446	0.287	0.000251507	Part	COX5A
PKIA	2.55687e-08	0.499924	0.517	0.326	0.000345868	Part	PKIA
DNAH7	2.69414e-08	1.23851	0.172	0.067	0.000364437	Part	DNAH7
APOC1	2.85059e-08	1.72024	0.101	0.024	0.000385599	Part	APOC1
ACBD7	3.91145e-08	0.489187	0.641	0.444	0.000529101	Part	ACBD7
CHCHD2	1.00927e-07	0.498386	0.497	0.313	0.00136524	Part	CHCHD2
ATP5PD	1.04183e-07	0.646943	0.338	0.185	0.00140928	Part	ATP5PD
NTRK2	1.97279e-07	0.171132	1	0.996	0.00266859	Part	NTRK2
PFDN5	2.06524e-07	0.930805	0.269	0.142	0.00279365	Part	PFDN5
ZMAT2	2.3877e-07	2.73055	0.064	0.01	0.00322985	Part	ZMAT2
OGA	2.44543e-07	0.738106	0.345	0.208	0.00330794	Part	OGA
SERINC1	2.45195e-07	0.858506	0.315	0.185	0.00331675	Part	SERINC1
SOD2	2.83387e-07	0.734066	0.32	0.181	0.00383338	Part	SOD2
CSTB	3.09179e-07	1.01293	0.23	0.118	0.00418226	Part	CSTB
JUNB	3.32898e-07	1.62353	0.117	0.038	0.00450311	Part	JUNB
PHYHIPL	3.41293e-07	0.891807	0.276	0.152	0.00461667	Part	PHYHIPL
USP22	3.71579e-07	0.51737	0.497	0.344	0.00502635	Part	USP22
HOPX	4.12989e-07	0.340671	0.715	0.529	0.0055865	Part	HOPX
COX6B1	4.23657e-07	0.516019	0.492	0.334	0.0057308	Part	COX6B1
NPTN	4.80922e-07	0.716582	0.308	0.174	0.00650544	Part	NPTN
GABARAPL2	5.32106e-07	0.551155	0.439	0.284	0.0071978	Part	GABARAPL2
PIFO	5.73971e-07	1.68635	0.113	0.037	0.00776411	Part	PIFO
DTNA	8.72304e-07	0.191194	1	0.983	0.0117997	Part	DTNA
GTF3C6	1.01628e-06	0.909664	0.237	0.125	0.0137472	Part	GTF3C6
ITGB8	1.03495e-06	0.622744	0.377	0.239	0.0139998	Part	ITGB8
RGR	1.04676e-06	1.66216	0.101	0.031	0.0141595	Part	RGR
MT1H	1.09262e-06	1.5801	0.133	0.053	0.0147798	Part	MT1H
PON2	2.10359e-06	0.681986	0.366	0.232	0.0284552	Part	PON2
RIDA	2.20899e-06	1.14833	0.166	0.075	0.0298811	Part	RIDA
GSN	2.58035e-06	0.381728	0.566	0.391	0.0349044	Part	GSN
LY6H	3.07534e-06	1.14682	0.172	0.083	0.0416001	Part	LY6H
SCG3	3.13835e-06	0.334759	0.6	0.422	0.0424524	Part	SCG3
RHOBTB3	3.20135e-06	0.447328	0.492	0.339	0.0433047	Part	RHOBTB3
FGF2	3.65024e-06	0.850336	0.264	0.154	0.0493768	Part	FGF2
FAM107A	2.22649e-32	0.681476	0.995	0.979	3.01177e-28	AD	FAM107A
BSG	1.60457e-22	1.66328	0.467	0.163	2.1705e-18	AD	BSG
SPARC1	5.09429e-21	0.762204	0.84	0.637	6.89104e-17	AD	SPARC
NSMF1	3.43127e-20	0.543414	1	0.986	4.64149e-16	AD	NSMF
MTURN	7.07571e-18	0.598485	0.877	0.746	9.57131e-14	AD	MTURN
MAPK8IP2	1.0888e-16	1.74926	0.33	0.107	1.47282e-12	AD	MAPK8IP2
B3GAT1	7.9424e-13	2.4464	0.132	0.022	1.07437e-08	AD	B3GAT1
ZMIZ2	4.05293e-12	1.8906	0.189	0.049	5.4824e-08	AD	ZMIZ2
DEAF1	8.60557e-12	1.60959	0.25	0.083	1.16408e-07	AD	DEAF1
ZCCHC24	2.45698e-11	3.06976	0.085	0.009	3.32356e-07	AD	ZCCHC24
LMTK3	4.73379e-11	2.01072	0.132	0.026	6.4034e-07	AD	LMTK3
KIF5A	7.52044e-11	0.939408	0.5	0.286	1.01729e-06	AD	KIF5A
BCAN	1.61409e-10	1.13574	0.382	0.185	2.18339e-06	AD	BCAN
KIF1C	1.97616e-10	1.68891	0.151	0.036	2.67315e-06	AD	KIF1C
TP53INP2	3.06446e-10	2.14552	0.123	0.025	4.14529e-06	AD	TP53INP2
SDC3	3.68532e-10	1.96378	0.146	0.036	4.98513e-06	AD	SDC3
MAP1A	7.30607e-10	1.23938	0.33	0.147	9.88293e-06	AD	MAP1A
ZNF219	2.20094e-09	2.57619	0.09	0.014	2.97721e-05	AD	ZNF219
EPB41L1	2.23317e-09	0.621593	0.774	0.576	3.02081e-05	AD	EPB41L1
FBXW4	1.15163e-08	1.56363	0.127	0.031	0.000155781	AD	FBXW4
ARHGEF25	1.84957e-08	1.49149	0.179	0.06	0.000250192	AD	ARHGEF25
TIMP3	2.45072e-08	2.01389	0.118	0.029	0.000331509	AD	TIMP3
UBE2H	3.25385e-08	2.43778	0.085	0.015	0.000440148	AD	UBE2H
ANP32B	3.54509e-08	2.72953	0.057	0.005	0.000479544	AD	ANP32B
TSG101	4.12709e-08	3.69994	0.052	0.004	0.000558271	AD	TSG101
MTA1	4.5538e-08	2.60145	0.075	0.012	0.000615993	AD	MTA1
PPP6R1	4.55823e-08	3.3739	0.052	0.004	0.000616591	AD	PPP6R1
CTDSP2	4.66178e-08	2.20669	0.094	0.019	0.000630599	AD	CTDSP2
TNS2	5.7138e-08	4.45624	0.038	0.001	0.000772905	AD	TNS2
KMT2D	5.76232e-08	3.9115	0.038	0.001	0.000779469	AD	KMT2D
PTTG1IP	6.73223e-08	1.65132	0.118	0.03	0.000910668	AD	PTTG1IP
NPC2	6.88272e-08	2.01503	0.123	0.033	0.000931026	AD	NPC2
CTSB	7.00072e-08	1.79954	0.113	0.028	0.000946987	AD	CTSB
EFHD1	8.27643e-08	1.15862	0.292	0.141	0.00111955	AD	EFHD1
PFN21	1.07205e-07	0.920674	0.42	0.256	0.00145016	AD	PFN2
MCRIP1	1.41011e-07	1.69715	0.108	0.027	0.00190746	AD	MCRIP1
SERGEF	1.69774e-07	1.6791	0.146	0.048	0.00229653	AD	SERGEF
MRFAP1L1	1.89195e-07	1.63353	0.151	0.051	0.00255924	AD	MRFAP1L1
IST1	2.90239e-07	7.71517	0.028	0	0.00392606	AD	IST1
NARF	2.90239e-07	8.12971	0.028	0	0.00392606	AD	NARF
KDSR	2.90239e-07	8.38355	0.028	0	0.00392606	AD	KDSR
NLGN2	3.09512e-07	1.43315	0.132	0.04	0.00418677	AD	NLGN2
SHISA6	3.50287e-07	3.21282	0.047	0.004	0.00473833	AD	SHISA6
ASAH1	3.68888e-07	1.56863	0.132	0.041	0.00498995	AD	ASAH1
EFR3B	3.87719e-07	1.05519	0.222	0.094	0.00524468	AD	EFR3B
TMX4	4.5645e-07	3.76724	0.042	0.003	0.0061744	AD	TMX4
RNF167	5.37992e-07	3.88172	0.033	0.001	0.00727742	AD	RNF167
TEF	8.52029e-07	1.11539	0.208	0.086	0.0115254	AD	TEF
RNF157	9.17141e-07	1.47148	0.137	0.045	0.0124062	AD	RNF157
MT1E1	9.75428e-07	0.423867	0.906	0.829	0.0131946	AD	MT1E
ADIRF	1.11165e-06	1.08874	0.236	0.11	0.0150373	AD	ADIRF
NRXN2	1.13536e-06	1.85801	0.085	0.019	0.015358	AD	NRXN2
NRSN2	1.31656e-06	1.55517	0.113	0.033	0.0178091	AD	NRSN2
WSB2	1.43161e-06	1.07878	0.198	0.082	0.0193654	AD	WSB2
GIT1	1.44526e-06	1.70115	0.108	0.031	0.0195501	AD	GIT1
PIN1	1.50837e-06	1.76618	0.104	0.029	0.0204037	AD	PIN1
MT2A1	1.52693e-06	0.347776	0.901	0.889	0.0206548	AD	MT2A
SYVN1	1.74616e-06	2.49125	0.057	0.009	0.0236203	AD	SYVN1
GFAP	1.88469e-06	0.17908	1	1	0.0254942	AD	GFAP
SYMPK	2.50524e-06	3.10981	0.042	0.004	0.0338884	AD	SYMPK
RNF11	2.66086e-06	1.36191	0.151	0.056	0.0359935	AD	RNF11
SNCA	2.71393e-06	1.55787	0.108	0.032	0.0367113	AD	SNCA
TXLNA	2.8617e-06	8.02135	0.024	0	0.0387102	AD	TXLNA
RNF20	2.8617e-06	7.84089	0.024	0	0.0387102	AD	RNF20
CIZ1	2.8617e-06	7.98665	0.024	0	0.0387102	AD	CIZ1
SMG1	2.8617e-06	7.48653	0.024	0	0.0387102	AD	SMG1
DOCK4	2.92701e-06	0.757902	0.283	0.143	0.0395936	AD	DOCK4
MAP4K4	2.94775e-06	0.907675	0.231	0.107	0.0398742	AD	MAP4K4
PHYHIP	2.95994e-06	1.99439	0.061	0.011	0.0400391	AD	PHYHIP
ARHGEF41	3.12522e-06	0.431677	0.953	0.93	0.0422749	AD	ARHGEF4
STMN3	3.21769e-06	0.858164	0.288	0.146	0.0435257	AD	STMN3
GUK1	3.47147e-06	1.07893	0.184	0.077	0.0469585	AD	GUK1

## Sheet: Ast_CA3
Unnamed: 0	p_val	avg_log2FC	pct.1	pct.2	p_val_adj	cluster	gene
HSP90AA1	2.51374e-77	0.666086	1	0.997	3.40033e-73	Control	HSP90AA1
HSPA1B	1.03074e-59	2.90041	0.433	0.1	1.39428e-55	Control	HSPA1B
UBC	2.49053e-42	0.324708	1	1	3.36895e-38	Control	UBC
MAP1B	8.36144e-40	0.437067	0.968	0.961	1.13105e-35	Control	MAP1B
PSAP	1.66724e-39	0.397238	1	0.999	2.25527e-35	Control	PSAP
HSPA8	3.33439e-39	1.15756	0.699	0.54	4.51042e-35	Control	HSPA8
SOD1	1.30266e-35	0.403294	0.991	0.978	1.76211e-31	Control	SOD1
PPP2CB	6.44493e-32	0.405614	0.987	0.988	8.71805e-28	Control	PPP2CB
PEBP1	8.11901e-32	0.400645	0.963	0.956	1.09826e-27	Control	PEBP1
CKB	1.41764e-29	0.343756	1	1	1.91764e-25	Control	CKB
GFAP	1.56445e-29	0.38007	1	1	2.11623e-25	Control	GFAP
AQP4	1.83279e-27	0.401628	0.989	0.999	2.47921e-23	Control	AQP4
TUBB2A	2.43058e-26	1.2552	0.543	0.335	3.28784e-22	Control	TUBB2A
GPM6A	1.19246e-23	0.423345	0.961	0.952	1.61304e-19	Control	GPM6A
PEA15	8.1472e-23	0.282878	0.991	0.992	1.10207e-18	Control	PEA15
DKK3	3.43769e-22	0.314799	0.998	0.996	4.65016e-18	Control	DKK3
ACTB	5.68937e-22	0.286802	0.976	0.99	7.69601e-18	Control	ACTB
HSPA1A	3.10507e-20	2.77541	0.213	0.067	4.20023e-16	Control	HSPA1A
ITM2C	6.26199e-19	0.501594	0.816	0.776	8.47059e-15	Control	ITM2C
LMO3	1.76849e-16	0.52212	0.751	0.72	2.39224e-12	Control	LMO3
ARHGEF4	2.56016e-16	0.405346	0.936	0.939	3.46313e-12	Control	ARHGEF4
CLU	3.22012e-15	0.154348	1	1	4.35585e-11	Control	CLU
ENO1	3.99042e-15	0.269472	0.974	0.978	5.39784e-11	Control	ENO1
MAPK10	1.60531e-14	0.301371	0.891	0.926	2.1715e-10	Control	MAPK10
AQP1	4.91088e-14	0.4674	0.848	0.847	6.64294e-10	Control	AQP1
ABR	5.53079e-14	0.614244	0.654	0.609	7.4815e-10	Control	ABR
MAP2K1	8.00379e-14	1.12056	0.41	0.26	1.08267e-09	Control	MAP2K1
KIF1B	4.53141e-13	0.342962	0.831	0.857	6.12964e-09	Control	KIF1B
SNCG	1.71798e-12	0.266426	0.927	0.931	2.32391e-08	Control	SNCG
DPYSL2	6.12132e-12	0.233553	0.959	0.964	8.28031e-08	Control	DPYSL2
HSPB8	6.28817e-12	0.702373	0.697	0.691	8.506e-08	Control	HSPB8
PPP2R2B	8.92934e-12	0.669231	0.609	0.553	1.20787e-07	Control	PPP2R2B
PRNP	2.79902e-11	0.262571	0.863	0.912	3.78624e-07	Control	PRNP
PLEKHB1	4.68605e-11	0.41774	0.76	0.753	6.33882e-07	Control	PLEKHB1
RUFY3	1.67469e-10	0.46636	0.695	0.704	2.26535e-06	Control	RUFY3
ITM2B	2.30875e-10	0.175646	1	1	3.12305e-06	Control	ITM2B
SLC1A2	2.55281e-10	0.248992	0.994	0.997	3.45319e-06	Control	SLC1A2
ATP1B2	2.82039e-10	0.328406	0.886	0.907	3.81515e-06	Control	ATP1B2
CST3	9.5236e-10	0.232531	0.968	0.99	1.28826e-05	Control	CST3
WBP2	2.91021e-09	0.394019	0.713	0.76	3.93664e-05	Control	WBP2
LGI1	4.9908e-09	0.416109	0.781	0.805	6.75106e-05	Control	LGI1
NRXN1	8.28168e-09	0.542116	0.607	0.598	0.000112026	Control	NRXN1
ATP6V1G2	1.76268e-08	0.490806	0.65	0.669	0.000238438	Control	ATP6V1G2
FTH1	2.32466e-08	0.165347	0.968	0.964	0.000314457	Control	FTH1
COX7C	5.68214e-08	0.219512	0.815	0.9	0.000768623	Control	COX7C
ATP1B1	7.79257e-08	1.24902	0.251	0.158	0.0010541	Control	ATP1B1
CIRBP	1.13354e-07	0.363233	0.687	0.764	0.00153334	Control	CIRBP
CHN1	1.60814e-07	0.288281	0.747	0.845	0.00217533	Control	CHN1
GABRA2	1.33078e-06	0.277479	0.773	0.819	0.0180014	Control	GABRA2
NSMF	1.52346e-06	0.186842	0.998	0.992	0.0206079	Control	NSMF
CPE	1.96239e-06	0.105537	1	1	0.0265452	Control	CPE
KIF1A	2.91407e-06	0.254137	0.764	0.805	0.0394187	Control	KIF1A
MT1X	9.08948e-76	1.38457	0.849	0.515	1.22953e-71	Part	MT1X
S100B	4.78112e-58	0.539373	0.998	0.988	6.46742e-54	Part	S100B
MT2A	1.94597e-55	0.668648	0.981	0.887	2.63231e-51	Part	MT2A
SPP1	9.47436e-45	5.74518	0.186	0.005	1.2816e-40	Part	SPP1
RHBDD2	1.85538e-40	1.53317	0.61	0.324	2.50977e-36	Part	RHBDD2
SERPINA3	4.48085e-39	2.32211	0.435	0.166	6.06125e-35	Part	SERPINA3
MT3	4.52836e-37	0.464872	0.998	0.992	6.12551e-33	Part	MT3
MT1E	1.30699e-36	0.512157	0.972	0.843	1.76796e-32	Part	MT1E
NTRK2	4.4755e-28	0.348652	1	0.975	6.05401e-24	Part	NTRK2
SLC1A3	1.41961e-27	0.533703	0.985	0.947	1.9203e-23	Part	SLC1A3
CRYAB1	2.61374e-24	0.354379	0.983	0.967	3.53561e-20	Part	CRYAB
ACTB1	4.95677e-24	0.323744	1	0.979	6.70502e-20	Part	ACTB
APP	7.54347e-24	0.545976	0.91	0.737	1.02041e-19	Part	APP
HOPX	1.17535e-21	0.505017	0.97	0.867	1.58989e-17	Part	HOPX
CLU1	3.40966e-21	0.193548	1	1	4.61225e-17	Part	CLU
C1orf61	1.01084e-20	0.500739	0.945	0.909	1.36737e-16	Part	C1orf61
LYVE1	6.35178e-18	1.30987	0.313	0.13	8.59206e-14	Part	LYVE1
SPARCL1	1.55324e-17	0.487679	0.859	0.753	2.10107e-13	Part	SPARCL1
FTL	3.89627e-17	0.337914	0.925	0.872	5.27048e-13	Part	FTL
UCHL1	1.16402e-14	0.461399	0.81	0.665	1.57457e-10	Part	UCHL1
HNRNPC	3.79107e-14	0.543371	0.729	0.563	5.12818e-10	Part	HNRNPC
ATP5F1B	4.97917e-14	0.631869	0.676	0.552	6.73532e-10	Part	ATP5F1B
RASD1	7.81092e-13	0.90758	0.501	0.361	1.05658e-08	Part	RASD1
CD44	6.00465e-12	0.627201	0.599	0.459	8.1225e-08	Part	CD44
RGR	1.57146e-11	1.90781	0.2	0.088	2.12571e-07	Part	RGR
COPS9	2.49642e-11	0.540533	0.631	0.487	3.37691e-07	Part	COPS9
CPE1	4.76788e-11	0.264369	1	1	6.44952e-07	Part	CPE
CANX	5.86237e-11	1.09471	0.354	0.224	7.93002e-07	Part	CANX
OLFM1	6.46499e-11	0.358198	0.787	0.701	8.7452e-07	Part	OLFM1
CADM3	7.37396e-11	0.35328	0.836	0.738	9.97475e-07	Part	CADM3
USP22	7.65825e-11	0.516932	0.678	0.57	1.03593e-06	Part	USP22
FTH11	1.21814e-10	0.218818	0.974	0.961	1.64778e-06	Part	FTH1
CALM3	1.95152e-10	0.258978	0.921	0.851	2.63983e-06	Part	CALM3
ETNPPL	1.18953e-09	0.574108	0.783	0.735	1.60907e-05	Part	ETNPPL
SDC4	3.61778e-09	0.583555	0.648	0.535	4.89378e-05	Part	SDC4
MRO	1.12131e-08	0.746538	0.439	0.318	0.000151679	Part	MRO
MGST1	1.12265e-08	0.457861	0.627	0.504	0.000151861	Part	MGST1
GPC5	1.33974e-08	0.959041	0.318	0.198	0.000181227	Part	GPC5
SCG3	2.22662e-08	0.649621	0.473	0.362	0.000301195	Part	SCG3
PRNP1	9.02566e-08	0.215496	0.925	0.883	0.0012209	Part	PRNP
NCDN1	1.04446e-07	0.283271	0.819	0.73	0.00141284	Part	NCDN
ACBD7	1.18921e-07	0.456258	0.638	0.539	0.00160865	Part	ACBD7
DTNA	1.27555e-07	0.171738	0.998	0.994	0.00172543	Part	DTNA
PPDPF	1.64873e-07	0.940919	0.288	0.188	0.00223024	Part	PPDPF
YWHAQ	1.9767e-07	0.364158	0.712	0.634	0.00267388	Part	YWHAQ
COX7C1	2.69903e-07	0.251108	0.942	0.841	0.00365098	Part	COX7C
DKK31	2.71374e-07	0.180305	1	0.995	0.00367088	Part	DKK3
CST31	4.85907e-07	0.149201	0.998	0.977	0.00657286	Part	CST3
PTGES3	6.74426e-07	0.313325	0.733	0.634	0.00912296	Part	PTGES3
NTSR2	1.22422e-06	1.2837	0.183	0.101	0.01656	Part	NTSR2
NRCAM	1.86576e-06	0.434494	0.574	0.491	0.0252381	Part	NRCAM
AHCYL1	1.89383e-06	0.219692	0.874	0.834	0.0256179	Part	AHCYL1
ANK21	2.65872e-06	0.236854	0.851	0.814	0.0359645	Part	ANK2
UBC1	3.07951e-06	0.119066	1	1	0.0416565	Part	UBC
PKIA	3.36301e-06	0.385538	0.601	0.512	0.0454915	Part	PKIA
GJB6	3.42821e-06	0.963235	0.26	0.168	0.0463734	Part	GJB6
IGFBP5	3.55785e-06	0.247073	0.859	0.78	0.048127	Part	IGFBP5
SPARC	3.52263e-69	0.97613	0.916	0.594	4.76506e-65	AD	SPARC
CAMK2A	9.99009e-69	3.71437	0.337	0.019	1.35136e-64	AD	CAMK2A
PHYHIP	1.23093e-61	3.6995	0.302	0.016	1.66508e-57	AD	PHYHIP
MAPK8IP2	1.85177e-53	1.55791	0.538	0.139	2.50489e-49	AD	MAPK8IP2
ENC1	1.53184e-45	7.40987	0.19	0.001	2.07212e-41	AD	ENC1
CNIH2	1.92998e-43	2.90713	0.25	0.023	2.61068e-39	AD	CNIH2
CBX6	3.08145e-43	2.20284	0.297	0.042	4.16828e-39	AD	CBX6
CAMK2N1	2.6685e-41	1.33163	0.49	0.141	3.60968e-37	AD	CAMK2N1
PSD	3.6015e-41	3.12053	0.223	0.017	4.87175e-37	AD	PSD
LMTK3	3.05047e-40	3.02362	0.216	0.016	4.12638e-36	AD	LMTK3
HPCA	1.07143e-39	2.19591	0.279	0.041	1.44933e-35	AD	HPCA
SDC3	2.70712e-39	2.4659	0.262	0.035	3.66192e-35	AD	SDC3
ARHGEF25	3.27709e-39	1.42786	0.455	0.13	4.43292e-35	AD	ARHGEF25
BSG	1.50455e-38	1.01554	0.634	0.232	2.0352e-34	AD	BSG
SNCA	5.72168e-38	1.30101	0.487	0.148	7.73971e-34	AD	SNCA
B3GAT1	9.5502e-38	2.62081	0.225	0.023	1.29185e-33	AD	B3GAT1
KCNN1	2.68343e-37	2.64135	0.23	0.026	3.62988e-33	AD	KCNN1
SHISA6	1.38753e-36	4.38718	0.171	0.006	1.87691e-32	AD	SHISA6
NCOR2	1.44407e-36	3.29111	0.187	0.011	1.95339e-32	AD	NCOR2
MAP1A	5.46935e-36	1.07584	0.525	0.175	7.39838e-32	AD	MAP1A
NLGN2	6.03529e-36	1.94721	0.281	0.05	8.16393e-32	AD	NLGN2
EEF2	3.32392e-35	1.50697	0.325	0.069	4.49626e-31	AD	EEF2
EEF1A2	3.76098e-35	1.49449	0.368	0.091	5.08748e-31	AD	EEF1A2
MTURN	3.10289e-34	0.836392	0.792	0.497	4.19728e-30	AD	MTURN
LRRC4B	5.51784e-33	3.10702	0.175	0.012	7.46398e-29	AD	LRRC4B
STX1B	5.53965e-32	3.2134	0.168	0.011	7.49348e-28	AD	STX1B
WSB2	7.61799e-32	1.37271	0.344	0.089	1.03049e-27	AD	WSB2
TP53INP2	8.7815e-32	3.76217	0.148	0.005	1.18787e-27	AD	TP53INP2
ZCCHC24	2.36507e-31	4.3388	0.143	0.004	3.19922e-27	AD	ZCCHC24
PLPPR2	2.73387e-31	1.70364	0.271	0.054	3.6981e-27	AD	PLPPR2
CTXN1	4.84453e-31	2.74805	0.188	0.02	6.55319e-27	AD	CTXN1
SLC17A7	1.28186e-30	1.8722	0.246	0.044	1.73397e-26	AD	SLC17A7
HAGH	1.80112e-30	0.971643	0.609	0.258	2.43638e-26	AD	HAGH
MLLT11	2.43474e-30	1.36761	0.353	0.098	3.29348e-26	AD	MLLT11
ZNF609	4.53039e-30	2.00966	0.236	0.041	6.12826e-26	AD	ZNF609
ABAT	3.30984e-29	1.46089	0.279	0.063	4.47722e-25	AD	ABAT
DEAF1	8.3107e-29	0.996784	0.393	0.12	1.12419e-24	AD	DEAF1
NRXN2	1.16017e-28	2.28077	0.182	0.021	1.56936e-24	AD	NRXN2
TJP1	1.16935e-28	1.95022	0.222	0.038	1.58179e-24	AD	TJP1
BTBD2	1.34555e-28	2.1237	0.188	0.024	1.82012e-24	AD	BTBD2
TSPYL1	1.58841e-28	2.92929	0.164	0.015	2.14864e-24	AD	TSPYL1
SPTBN1	6.64818e-28	1.2452	0.318	0.085	8.99299e-24	AD	SPTBN1
CPLX2	1.09384e-27	2.68942	0.166	0.017	1.47964e-23	AD	CPLX2
GIT1	1.80963e-27	2.58879	0.168	0.018	2.44789e-23	AD	GIT1
CASKIN1	3.25817e-27	1.36564	0.272	0.065	4.40733e-23	AD	CASKIN1
HIPK2	6.67363e-27	0.855998	0.588	0.256	9.02742e-23	AD	HIPK2
CCPG1	1.43497e-26	2.60357	0.166	0.019	1.94109e-22	AD	CCPG1
NRGN	3.06257e-26	1.65334	0.246	0.054	4.14273e-22	AD	NRGN
MAPK8IP1	4.78393e-26	1.57184	0.236	0.05	6.47122e-22	AD	MAPK8IP1
METRN	5.29653e-26	0.937049	0.342	0.103	7.16461e-22	AD	METRN
SPECC1	5.9748e-26	1.37678	0.295	0.08	8.08211e-22	AD	SPECC1
KIF1C	6.57018e-26	3.34696	0.133	0.008	8.88748e-22	AD	KIF1C
GUK1	7.08159e-26	1.27363	0.283	0.072	9.57927e-22	AD	GUK1
SFPQ	1.04025e-25	1.28461	0.311	0.089	1.40715e-21	AD	SFPQ
MAPK8IP3	1.37181e-25	1.27737	0.257	0.06	1.85565e-21	AD	MAPK8IP3
PAIP2	1.75782e-25	1.25683	0.304	0.086	2.3778e-21	AD	PAIP2
NDN	4.01738e-25	4.3023	0.113	0.003	5.43431e-21	AD	NDN
KIF5C	4.82785e-25	1.85792	0.201	0.036	6.53064e-21	AD	KIF5C
ANTXR1	5.64987e-25	1.28682	0.267	0.069	7.64258e-21	AD	ANTXR1
ZBTB7A	6.10258e-25	1.59362	0.234	0.052	8.25496e-21	AD	ZBTB7A
TXNL1	9.23477e-25	1.86392	0.201	0.037	1.24919e-20	AD	TXNL1
GTF2F1	2.46834e-24	4.23673	0.113	0.004	3.33892e-20	AD	GTF2F1
NFIC	3.06291e-24	1.52834	0.239	0.057	4.1432e-20	AD	NFIC
GRIK5	3.27343e-24	2.15724	0.175	0.027	4.42797e-20	AD	GRIK5
TMCC2	4.70973e-24	1.5267	0.239	0.058	6.37085e-20	AD	TMCC2
FAM171A2	4.90829e-24	3.28653	0.133	0.011	6.63944e-20	AD	FAM171A2
PTMS	4.928e-24	1.50768	0.25	0.062	6.6661e-20	AD	PTMS
RAB31	7.0064e-24	1.2559	0.248	0.061	9.47756e-20	AD	RAB31
MERTK	1.1943e-23	3.05967	0.126	0.009	1.61553e-19	AD	MERTK
WAC	1.4807e-23	2.16945	0.173	0.028	2.00295e-19	AD	WAC
RUNDC3A	2.16434e-23	1.66068	0.209	0.044	2.92771e-19	AD	RUNDC3A
MAP2	2.81806e-23	0.878441	0.414	0.152	3.81199e-19	AD	MAP2
TAF15	4.41362e-23	1.60918	0.229	0.055	5.9703e-19	AD	TAF15
CCDC106	7.14913e-23	2.41935	0.147	0.018	9.67063e-19	AD	CCDC106
PPP1R12C	1.13568e-22	1.23806	0.262	0.072	1.53624e-18	AD	PPP1R12C
KAT6B	1.47883e-22	1.30912	0.279	0.082	2.00041e-18	AD	KAT6B
VIM	1.91548e-22	1.38465	0.229	0.055	2.59106e-18	AD	VIM
CDC42EP4	3.04783e-22	0.880029	0.363	0.131	4.1228e-18	AD	CDC42EP4
SETD3	4.47888e-22	1.4388	0.223	0.054	6.05858e-18	AD	SETD3
APCDD1	4.48023e-22	1.33147	0.229	0.057	6.06041e-18	AD	APCDD1
AGAP3	4.77001e-22	1.94344	0.178	0.033	6.45239e-18	AD	AGAP3
IGFBP7	7.91226e-22	1.24184	0.265	0.076	1.07029e-17	AD	IGFBP7
ZNF358	1.09867e-21	2.7323	0.126	0.012	1.48617e-17	AD	ZNF358
ARGLU1	1.44149e-21	0.773691	0.462	0.19	1.9499e-17	AD	ARGLU1
MAP4K4	1.95388e-21	1.50852	0.187	0.038	2.64301e-17	AD	MAP4K4
SMOX	3.52543e-21	0.752896	0.41	0.162	4.76885e-17	AD	SMOX
WNK1	3.76129e-21	1.296	0.255	0.073	5.0879e-17	AD	WNK1
PALLD	3.77129e-21	0.81274	0.396	0.156	5.10143e-17	AD	PALLD
FAM193B	4.26886e-21	1.16908	0.26	0.076	5.77448e-17	AD	FAM193B
SNCB	5.40054e-21	1.35907	0.216	0.052	7.30531e-17	AD	SNCB
ROBO3	5.45083e-21	2.3429	0.14	0.019	7.37334e-17	AD	ROBO3
BCAN	6.51022e-21	0.964019	0.347	0.126	8.80638e-17	AD	BCAN
ITPK1	8.15447e-21	0.692491	0.393	0.148	1.10306e-16	AD	ITPK1
ATP9B	1.05201e-20	1.6762	0.19	0.042	1.42305e-16	AD	ATP9B
DMTN	1.09999e-20	1.14606	0.243	0.066	1.48796e-16	AD	DMTN
TXNIP	1.10546e-20	2.34924	0.134	0.017	1.49535e-16	AD	TXNIP
NFE2L1	1.16932e-20	0.667935	0.538	0.241	1.58173e-16	AD	NFE2L1
KLF15	1.17722e-20	1.15769	0.209	0.051	1.59242e-16	AD	KLF15
REEP2	1.29348e-20	0.880439	0.339	0.118	1.74969e-16	AD	REEP2
PREX1	1.36743e-20	1.62459	0.18	0.037	1.84972e-16	AD	PREX1
NFIX	1.7123e-20	1.11937	0.271	0.083	2.31622e-16	AD	NFIX
MAP7	2.27407e-20	0.843796	0.365	0.137	3.07613e-16	AD	MAP7
SNN	2.51618e-20	0.790072	0.389	0.15	3.40364e-16	AD	SNN
RHOA	2.78376e-20	1.23052	0.272	0.085	3.7656e-16	AD	RHOA
NAP1L5	2.84405e-20	1.55649	0.19	0.043	3.84715e-16	AD	NAP1L5
CUTA	3.38393e-20	2.11754	0.157	0.028	4.57744e-16	AD	CUTA
YWHAH	4.22277e-20	0.682202	0.59	0.271	5.71214e-16	AD	YWHAH
SNPH	5.18702e-20	1.36616	0.199	0.047	7.01648e-16	AD	SNPH
MMP28	5.8499e-20	1.23006	0.227	0.062	7.91316e-16	AD	MMP28
HIF3A	1.00519e-19	0.716275	0.449	0.193	1.35971e-15	AD	HIF3A
CTBP1	1.10528e-19	1.19226	0.216	0.057	1.49511e-15	AD	CTBP1
KIF3C	1.17022e-19	2.14176	0.127	0.016	1.58296e-15	AD	KIF3C
CRKL	1.21106e-19	2.02514	0.14	0.021	1.6382e-15	AD	CRKL
MLLT6	1.21487e-19	2.41059	0.124	0.015	1.64335e-15	AD	MLLT6
GOLGA7B	1.30648e-19	1.07702	0.258	0.08	1.76727e-15	AD	GOLGA7B
CCT3	1.39668e-19	1.25422	0.215	0.056	1.88929e-15	AD	CCT3
ITGB5	1.44296e-19	2.38692	0.119	0.013	1.95189e-15	AD	ITGB5
ARHGEF11	1.78326e-19	2.24971	0.131	0.018	2.41221e-15	AD	ARHGEF11
FGFRL1	2.05558e-19	0.937856	0.272	0.088	2.78059e-15	AD	FGFRL1
SRSF11	2.50495e-19	2.10404	0.14	0.022	3.38844e-15	AD	SRSF11
PCM1	2.913e-19	0.988855	0.326	0.12	3.94042e-15	AD	PCM1
LMO4	3.30542e-19	1.08848	0.293	0.102	4.47125e-15	AD	LMO4
ATXN7L3B	3.58929e-19	0.72694	0.344	0.126	4.85523e-15	AD	ATXN7L3B
ADCYAP1R1	3.70375e-19	0.515963	0.44	0.185	5.01006e-15	AD	ADCYAP1R1
LASP1	3.89772e-19	1.87244	0.15	0.027	5.27245e-15	AD	LASP1
TADA3	4.09722e-19	1.52026	0.173	0.037	5.54231e-15	AD	TADA3
CBX5	4.60421e-19	0.692994	0.387	0.154	6.22811e-15	AD	CBX5
RASSF4	4.73252e-19	1.43855	0.201	0.052	6.40168e-15	AD	RASSF4
FAM181B	5.18656e-19	0.717452	0.373	0.147	7.01586e-15	AD	FAM181B
SUGT1	5.41435e-19	2.38754	0.113	0.012	7.32399e-15	AD	SUGT1
NEK6	7.52072e-19	1.15692	0.195	0.049	1.01733e-14	AD	NEK6
MEGF8	7.73018e-19	2.9558	0.105	0.009	1.04566e-14	AD	MEGF8
RNF157	1.05666e-18	1.53105	0.187	0.045	1.42935e-14	AD	RNF157
ZBTB20	1.14316e-18	0.643692	0.38	0.152	1.54635e-14	AD	ZBTB20
EFHD1	1.17855e-18	0.818349	0.366	0.147	1.59422e-14	AD	EFHD1
HNRNPA0	1.24243e-18	2.5824	0.117	0.014	1.68063e-14	AD	HNRNPA0
YAP1	1.36955e-18	2.27135	0.124	0.017	1.85259e-14	AD	YAP1
EFR3B	1.41786e-18	0.643278	0.382	0.153	1.91794e-14	AD	EFR3B
MSI2	1.54511e-18	0.544785	0.476	0.21	2.09007e-14	AD	MSI2
IDH2	1.57159e-18	0.753799	0.293	0.101	2.1259e-14	AD	IDH2
CCND3	1.73183e-18	1.65734	0.159	0.032	2.34265e-14	AD	CCND3
TIMP3	1.83542e-18	1.76653	0.145	0.026	2.48278e-14	AD	TIMP3
CSNK1G2	1.98768e-18	1.64514	0.152	0.029	2.68874e-14	AD	CSNK1G2
ZBTB4	2.65421e-18	3.03472	0.099	0.008	3.59035e-14	AD	ZBTB4
EPN1	2.91924e-18	2.72971	0.11	0.012	3.94885e-14	AD	EPN1
TSPYL4	3.44189e-18	0.973403	0.265	0.086	4.65584e-14	AD	TSPYL4
LINGO1	3.68005e-18	1.20646	0.199	0.052	4.978e-14	AD	LINGO1
RAB11FIP3	4.34823e-18	2.06912	0.129	0.02	5.88185e-14	AD	RAB11FIP3
SNAP25	4.39574e-18	0.609032	0.695	0.356	5.94612e-14	AD	SNAP25
HSPA2	5.0835e-18	1.90127	0.136	0.023	6.87645e-14	AD	HSPA2
PACS2	5.93232e-18	1.15678	0.211	0.059	8.02465e-14	AD	PACS2
DLG4	6.01606e-18	0.691547	0.417	0.178	8.13792e-14	AD	DLG4
CCDC173	7.42239e-18	2.08337	0.133	0.022	1.00403e-13	AD	CCDC173
SRRM2	1.00688e-17	0.661603	0.483	0.221	1.362e-13	AD	SRRM2
PAQR6	1.30682e-17	0.653514	0.616	0.345	1.76773e-13	AD	PAQR6
FAM107A	1.41943e-17	0.248831	0.998	0.994	1.92006e-13	AD	FAM107A
CAPS	1.52826e-17	0.924705	0.255	0.086	2.06728e-13	AD	CAPS
HNRNPUL1	1.60452e-17	0.90676	0.29	0.103	2.17043e-13	AD	HNRNPUL1
CASC3	1.7215e-17	1.53382	0.152	0.031	2.32867e-13	AD	CASC3
MARCKS	1.77551e-17	0.615989	0.504	0.238	2.40173e-13	AD	MARCKS
ACOT7	2.05416e-17	0.615253	0.551	0.291	2.77866e-13	AD	ACOT7
NDUFA8	2.40936e-17	1.2571	0.244	0.082	3.25914e-13	AD	NDUFA8
ANKRD9	2.52379e-17	0.604096	0.337	0.132	3.41394e-13	AD	ANKRD9
ARHGAP35	2.77642e-17	1.03657	0.211	0.061	3.75566e-13	AD	ARHGAP35
SAMD4B	3.26594e-17	2.39646	0.089	0.006	4.41784e-13	AD	SAMD4B
ZNF385A	3.49731e-17	1.37159	0.152	0.032	4.73081e-13	AD	ZNF385A
PFN2	3.99355e-17	0.530738	0.712	0.369	5.40207e-13	AD	PFN2
DYNC1LI2	4.03774e-17	1.34096	0.178	0.045	5.46185e-13	AD	DYNC1LI2
TPCN1	4.07723e-17	0.824377	0.3	0.113	5.51527e-13	AD	TPCN1
C1orf122	4.45547e-17	0.719235	0.339	0.134	6.02692e-13	AD	C1orf122
PPIB	4.52162e-17	2.7238	0.099	0.01	6.1164e-13	AD	PPIB
RGCC	4.63506e-17	3.87858	0.082	0.004	6.26984e-13	AD	RGCC
ADGRG1	5.96336e-17	0.888812	0.284	0.104	8.06663e-13	AD	ADGRG1
MOB1B	6.59504e-17	1.76913	0.157	0.036	8.92111e-13	AD	MOB1B
DTX3	6.69266e-17	0.850453	0.262	0.09	9.05316e-13	AD	DTX3
PPP2R2C	6.86654e-17	1.11222	0.215	0.064	9.28837e-13	AD	PPP2R2C
PRRC2C	7.01522e-17	1.05196	0.248	0.083	9.48949e-13	AD	PRRC2C
AHNAK	8.44334e-17	0.868072	0.291	0.109	1.14213e-12	AD	AHNAK
ADIRF	8.79978e-17	1.27115	0.206	0.061	1.19035e-12	AD	ADIRF
AGPAT3	9.77269e-17	1.24909	0.182	0.048	1.32195e-12	AD	AGPAT3
PLTP	1.08183e-16	0.686014	0.407	0.184	1.46339e-12	AD	PLTP
TNS1	1.1491e-16	3.89787	0.08	0.004	1.55439e-12	AD	TNS1
IFI6	1.25624e-16	3.348	0.08	0.004	1.69931e-12	AD	IFI6
CCND2	1.27474e-16	4.49204	0.077	0.003	1.72435e-12	AD	CCND2
KIF5B	1.73169e-16	2.64678	0.094	0.009	2.34245e-12	AD	KIF5B
HHIPL1	2.01762e-16	1.67372	0.126	0.022	2.72923e-12	AD	HHIPL1
CTNNB1	2.34892e-16	1.71138	0.134	0.026	3.17738e-12	AD	CTNNB1
INF2	2.5103e-16	2.42058	0.096	0.01	3.39569e-12	AD	INF2
ARID1B	2.64532e-16	2.24425	0.106	0.014	3.57832e-12	AD	ARID1B
NACC2	2.66877e-16	1.59496	0.133	0.025	3.61005e-12	AD	NACC2
PCNX2	2.68782e-16	1.90668	0.127	0.023	3.63582e-12	AD	PCNX2
TOLLIP	2.71524e-16	0.870939	0.298	0.114	3.6729e-12	AD	TOLLIP
PFKL	2.88912e-16	0.99837	0.199	0.058	3.90811e-12	AD	PFKL
CHST1	2.91383e-16	1.6616	0.147	0.032	3.94153e-12	AD	CHST1
RERE	3.06128e-16	1.09907	0.213	0.066	4.14099e-12	AD	RERE
AHDC1	4.29112e-16	1.13265	0.192	0.055	5.8046e-12	AD	AHDC1
HTRA1	4.41755e-16	0.714753	0.309	0.119	5.97562e-12	AD	HTRA1
NUMA1	4.76523e-16	1.92472	0.124	0.022	6.44593e-12	AD	NUMA1
AP2A2	5.14517e-16	1.2481	0.18	0.049	6.95988e-12	AD	AP2A2
NISCH	5.63648e-16	0.980923	0.23	0.075	7.62447e-12	AD	NISCH
RNF11	6.04156e-16	0.844334	0.304	0.119	8.17242e-12	AD	RNF11
FGFR1	6.52934e-16	1.26123	0.154	0.036	8.83224e-12	AD	FGFR1
KNDC1	8.19875e-16	1.12932	0.18	0.05	1.10904e-11	AD	KNDC1
CLTC	8.66929e-16	1.36431	0.18	0.05	1.1727e-11	AD	CLTC
USF2	8.99935e-16	0.578887	0.429	0.193	1.21734e-11	AD	USF2
SEC62	9.1195e-16	1.20027	0.204	0.063	1.23359e-11	AD	SEC62
TNK2	9.98788e-16	8.87027	0.063	0	1.35106e-11	AD	TNK2
SUPT5H	1.04613e-15	0.673017	0.274	0.1	1.4151e-11	AD	SUPT5H
FAM53C	1.2325e-15	3.02301	0.087	0.008	1.6672e-11	AD	FAM53C
UBXN6	1.53522e-15	0.777307	0.335	0.14	2.07669e-11	AD	UBXN6
CSDC2	1.59631e-15	0.800148	0.216	0.07	2.15932e-11	AD	CSDC2
MTCH1	1.72434e-15	0.716648	0.291	0.113	2.33252e-11	AD	MTCH1
LRP4	1.74866e-15	0.683851	0.293	0.115	2.36541e-11	AD	LRP4
NOTCH2	2.04085e-15	0.968772	0.248	0.091	2.76066e-11	AD	NOTCH2
BRI3	2.07512e-15	2.77161	0.084	0.007	2.80701e-11	AD	BRI3
C14orf132	2.32654e-15	1.3015	0.175	0.048	3.14711e-11	AD	C14orf132
MTMR3	2.46647e-15	4.83679	0.068	0.002	3.3364e-11	AD	MTMR3
LHX2	2.51106e-15	0.983049	0.206	0.065	3.39672e-11	AD	LHX2
SMIM12	2.63856e-15	2.039	0.106	0.016	3.56918e-11	AD	SMIM12
EIF3K	3.18342e-15	0.925463	0.234	0.081	4.30621e-11	AD	EIF3K
ATP6V0B	3.38408e-15	0.706895	0.387	0.179	4.57764e-11	AD	ATP6V0B
ZHX3	3.39318e-15	0.769908	0.255	0.094	4.58995e-11	AD	ZHX3
FASN	3.39368e-15	0.615946	0.26	0.095	4.59063e-11	AD	FASN
ABHD8	3.41974e-15	0.791447	0.244	0.086	4.62588e-11	AD	ABHD8
NYAP1	4.28582e-15	0.743062	0.311	0.13	5.79743e-11	AD	NYAP1
SEMA4B	4.63607e-15	0.739587	0.255	0.094	6.27122e-11	AD	SEMA4B
RYR1	4.70179e-15	2.52924	0.092	0.011	6.36011e-11	AD	RYR1
METTL7B	5.18654e-15	1.71589	0.129	0.027	7.01583e-11	AD	METTL7B
FBXW4	5.75697e-15	1.32312	0.145	0.034	7.78745e-11	AD	FBXW4
SLC35E2B	6.36063e-15	1.61502	0.119	0.022	8.60403e-11	AD	SLC35E2B
ACAP3	6.63545e-15	4.06963	0.066	0.002	8.97577e-11	AD	ACAP3
GPC1	1.02677e-14	0.818516	0.229	0.08	1.38892e-10	AD	GPC1
EIF4G2	1.05627e-14	2.17302	0.101	0.015	1.42881e-10	AD	EIF4G2
PON2	1.07074e-14	0.510619	0.49	0.244	1.44839e-10	AD	PON2
PNPLA6	1.23283e-14	2.80368	0.086	0.009	1.66765e-10	AD	PNPLA6
CBARP	1.50259e-14	2.33041	0.098	0.014	2.03255e-10	AD	CBARP
BSN	1.61729e-14	8.65129	0.058	0	2.18771e-10	AD	BSN
TAOK1	1.61856e-14	1.50986	0.159	0.043	2.18943e-10	AD	TAOK1
CHDH	1.65653e-14	3.54332	0.065	0.002	2.24079e-10	AD	CHDH
ATP5F1D	1.65748e-14	0.53803	0.384	0.173	2.24207e-10	AD	ATP5F1D
EIF3A	1.67179e-14	1.36534	0.175	0.052	2.26143e-10	AD	EIF3A
UBE2D2	1.69334e-14	1.05528	0.202	0.067	2.29058e-10	AD	UBE2D2
TRPS1	1.842e-14	0.362788	0.398	0.179	2.49167e-10	AD	TRPS1
PPP1R9B	1.94569e-14	0.86947	0.302	0.126	2.63193e-10	AD	PPP1R9B
POU3F2	2.41421e-14	0.927897	0.208	0.07	3.26571e-10	AD	POU3F2
AMY2B	2.59676e-14	1.8472	0.129	0.029	3.51263e-10	AD	AMY2B
PREX2	2.7289e-14	0.726624	0.213	0.072	3.69139e-10	AD	PREX2
TRIM9	2.85385e-14	0.919978	0.175	0.051	3.8604e-10	AD	TRIM9
MT1F	3.12898e-14	0.597975	0.438	0.218	4.23257e-10	AD	MT1F
GLRX	3.63478e-14	1.71837	0.11	0.02	4.91676e-10	AD	GLRX
ARID1A	3.6648e-14	0.974812	0.206	0.069	4.95737e-10	AD	ARID1A
TNRC6A	3.79155e-14	1.18623	0.15	0.039	5.12883e-10	AD	TNRC6A
ACACB	3.98597e-14	1.08297	0.199	0.066	5.39182e-10	AD	ACACB
SAMD14	4.28551e-14	5.32684	0.059	0.001	5.797e-10	AD	SAMD14
PLXNB2	5.05002e-14	0.862567	0.218	0.076	6.83116e-10	AD	PLXNB2
CNP	5.60117e-14	3.23361	0.072	0.005	7.5767e-10	AD	CNP
DCHS2	5.87728e-14	1.58053	0.113	0.022	7.95019e-10	AD	DCHS2
BCR	6.29819e-14	0.556676	0.293	0.12	8.51956e-10	AD	BCR
AJM1	7.11456e-14	2.80101	0.077	0.007	9.62387e-10	AD	AJM1
HMGN3	7.50839e-14	1.57315	0.127	0.029	1.01566e-09	AD	HMGN3
PLEKHM2	8.07165e-14	2.28508	0.082	0.009	1.09185e-09	AD	PLEKHM2
CTIF	8.1376e-14	1.18257	0.152	0.041	1.10077e-09	AD	CTIF
CYB5R3	8.98326e-14	1.56639	0.127	0.029	1.21517e-09	AD	CYB5R3
SCP2	9.97358e-14	1.07939	0.192	0.063	1.34913e-09	AD	SCP2
TEF	1.00589e-13	0.683017	0.251	0.096	1.36066e-09	AD	TEF
SYNE1	1.00936e-13	1.53817	0.127	0.029	1.36536e-09	AD	SYNE1
PYGB	1.025e-13	0.497833	0.45	0.22	1.38651e-09	AD	PYGB
ZNF444	1.27173e-13	1.72788	0.112	0.022	1.72027e-09	AD	ZNF444
SLC48A1	1.30004e-13	0.744394	0.246	0.094	1.75856e-09	AD	SLC48A1
HADHA	1.32054e-13	1.20619	0.119	0.025	1.78629e-09	AD	HADHA
MTA1	1.3688e-13	1.94278	0.105	0.019	1.85157e-09	AD	MTA1
KIAA1671	1.37314e-13	0.782837	0.187	0.06	1.85745e-09	AD	KIAA1671
DDX5	1.44504e-13	0.437041	0.478	0.234	1.95471e-09	AD	DDX5
VEGFA	1.46242e-13	2.47056	0.086	0.011	1.97822e-09	AD	VEGFA
TGFB2	1.50187e-13	0.70604	0.33	0.15	2.03159e-09	AD	TGFB2
GOLGB1	1.55826e-13	0.951891	0.164	0.048	2.10786e-09	AD	GOLGB1
SNU13	1.57832e-13	1.93328	0.106	0.02	2.13499e-09	AD	SNU13
FMNL2	1.61718e-13	0.885461	0.201	0.068	2.18756e-09	AD	FMNL2
LSM14B	1.64882e-13	1.10817	0.19	0.064	2.23035e-09	AD	LSM14B
PI4KA	1.78351e-13	0.830879	0.255	0.1	2.41256e-09	AD	PI4KA
CDC42BPB	1.80043e-13	1.31469	0.136	0.034	2.43544e-09	AD	CDC42BPB
GNA14	1.8242e-13	0.928699	0.134	0.033	2.4676e-09	AD	GNA14
DTX1	1.97346e-13	0.559818	0.25	0.096	2.6695e-09	AD	DTX1
SCRN1	2.09347e-13	0.640918	0.351	0.161	2.83184e-09	AD	SCRN1
BAIAP3	2.17069e-13	0.86156	0.213	0.077	2.93629e-09	AD	BAIAP3
NR2F1	2.47332e-13	0.611311	0.255	0.101	3.34565e-09	AD	NR2F1
MAZ	2.59853e-13	2.82836	0.077	0.008	3.51503e-09	AD	MAZ
EVL	2.60177e-13	8.44449	0.052	0	3.51942e-09	AD	EVL
TRIM41	2.62796e-13	1.43699	0.134	0.034	3.55485e-09	AD	TRIM41
PSMB2	2.66106e-13	1.21231	0.14	0.036	3.59961e-09	AD	PSMB2
SPHK2	2.73471e-13	1.91045	0.094	0.015	3.69924e-09	AD	SPHK2
DPYSL3	2.788e-13	0.475511	0.579	0.318	3.77133e-09	AD	DPYSL3
NBL1	2.89506e-13	0.874931	0.18	0.057	3.91615e-09	AD	NBL1
SERF2	3.00562e-13	0.627628	0.293	0.122	4.0657e-09	AD	SERF2
PLCD3	3.51794e-13	0.71654	0.298	0.129	4.75872e-09	AD	PLCD3
S100A13	3.70554e-13	0.58151	0.333	0.15	5.01248e-09	AD	S100A13
CAPN2	3.71493e-13	0.654363	0.319	0.144	5.02519e-09	AD	CAPN2
YY1AP1	3.8705e-13	0.513113	0.576	0.315	5.23563e-09	AD	YY1AP1
ACTR1A	3.92359e-13	0.924249	0.178	0.057	5.30744e-09	AD	ACTR1A
CAPN1	4.07242e-13	1.98366	0.098	0.017	5.50877e-09	AD	CAPN1
ECHDC2	4.25838e-13	0.98135	0.161	0.048	5.76032e-09	AD	ECHDC2
B4GALNT4	4.81877e-13	0.342152	0.415	0.199	6.51835e-09	AD	B4GALNT4
PTGDS	5.27037e-13	0.508499	0.635	0.352	7.12923e-09	AD	PTGDS
COX5B	5.43443e-13	0.455352	0.501	0.253	7.35115e-09	AD	COX5B
SGPP1	5.55401e-13	3.761	0.061	0.003	7.51291e-09	AD	SGPP1
DRAP1	5.68875e-13	1.22129	0.171	0.055	7.69517e-09	AD	DRAP1
ATP6V1A	6.09565e-13	0.530803	0.304	0.13	8.24559e-09	AD	ATP6V1A
ARHGDIA	6.3327e-13	1.91848	0.092	0.015	8.56624e-09	AD	ARHGDIA
PCBP1	6.40327e-13	1.37493	0.129	0.032	8.6617e-09	AD	PCBP1
RUBCN	6.72164e-13	5.66405	0.054	0.001	9.09236e-09	AD	RUBCN
SMARCB1	6.74275e-13	1.84768	0.113	0.025	9.12092e-09	AD	SMARCB1
NCL	6.82733e-13	2.01467	0.101	0.019	9.23533e-09	AD	NCL
CLTB	7.09921e-13	2.03086	0.094	0.016	9.6031e-09	AD	CLTB
DCUN1D4	7.47434e-13	0.856897	0.218	0.081	1.01105e-08	AD	DCUN1D4
APBB1	7.49931e-13	1.31475	0.129	0.032	1.01443e-08	AD	APBB1
MAP2K2	8.27545e-13	1.01929	0.147	0.041	1.11942e-08	AD	MAP2K2
PKD1	9.05257e-13	0.576524	0.321	0.143	1.22454e-08	AD	PKD1
SETD2	9.41756e-13	2.67259	0.077	0.009	1.27391e-08	AD	SETD2
SPOCK2	9.43053e-13	0.42607	0.723	0.449	1.27567e-08	AD	SPOCK2
KCNMA1	1.18225e-12	0.978233	0.18	0.06	1.59923e-08	AD	KCNMA1
MAPRE1	1.19004e-12	1.41396	0.115	0.026	1.60977e-08	AD	MAPRE1
SPAG9	1.21978e-12	1.58599	0.105	0.021	1.65e-08	AD	SPAG9
PTTG1IP	1.2677e-12	1.10069	0.138	0.037	1.71482e-08	AD	PTTG1IP
N4BP2L2	1.39027e-12	0.630726	0.342	0.159	1.88061e-08	AD	N4BP2L2
SAMD4A	1.43077e-12	1.27343	0.117	0.027	1.93541e-08	AD	SAMD4A
SH3BP2	1.51344e-12	2.24225	0.068	0.006	2.04723e-08	AD	SH3BP2
COX4I1	1.52242e-12	0.352027	0.435	0.211	2.05938e-08	AD	COX4I1
CHMP4B	1.60109e-12	0.905209	0.229	0.091	2.1658e-08	AD	CHMP4B
CEP170B	1.6357e-12	3.95356	0.056	0.002	2.21261e-08	AD	CEP170B
KCNQ2	1.65269e-12	8.21852	0.049	0	2.23559e-08	AD	KCNQ2
STMN3	1.71071e-12	0.444956	0.663	0.373	2.31408e-08	AD	STMN3
PLXNB1	1.87794e-12	0.565877	0.365	0.174	2.54028e-08	AD	PLXNB1
CABLES1	1.87853e-12	0.590568	0.325	0.148	2.54109e-08	AD	CABLES1
FZD7	1.88716e-12	0.800634	0.19	0.067	2.55276e-08	AD	FZD7
PRRC2A	1.97496e-12	1.64214	0.101	0.02	2.67152e-08	AD	PRRC2A
TUB	1.98652e-12	0.688125	0.274	0.117	2.68717e-08	AD	TUB
NPTXR1	2.02914e-12	0.522859	0.428	0.208	2.74482e-08	AD	NPTXR
YTHDC1	2.08516e-12	2.88772	0.065	0.005	2.8206e-08	AD	YTHDC1
SRGAP3	2.09289e-12	1.11105	0.14	0.039	2.83105e-08	AD	SRGAP3
MAP7D1	2.18706e-12	0.922839	0.162	0.051	2.95843e-08	AD	MAP7D1
VSIR	2.25525e-12	2.72663	0.07	0.007	3.05068e-08	AD	VSIR
MPRIP	2.35078e-12	2.08781	0.08	0.011	3.17989e-08	AD	MPRIP
DAG1	2.64745e-12	1.545	0.105	0.022	3.58121e-08	AD	DAG1
FBXL16	2.68611e-12	3.35508	0.061	0.004	3.6335e-08	AD	FBXL16
KHDRBS1	2.76034e-12	2.19935	0.089	0.015	3.73392e-08	AD	KHDRBS1
ICA1L	2.83783e-12	1.32015	0.126	0.032	3.83873e-08	AD	ICA1L
DYNC1H1	3.12689e-12	0.936105	0.164	0.052	4.22975e-08	AD	DYNC1H1
BRINP1	3.27526e-12	0.523955	0.295	0.129	4.43044e-08	AD	BRINP1
FARP1	3.44942e-12	0.635746	0.195	0.07	4.66603e-08	AD	FARP1
NWD1	3.50144e-12	0.762134	0.169	0.056	4.7364e-08	AD	NWD1
SPEG	3.65177e-12	1.18778	0.138	0.039	4.93974e-08	AD	SPEG
OLFM21	4.08881e-12	0.301572	0.405	0.195	5.53094e-08	AD	OLFM2
CYHR1	4.46465e-12	1.8249	0.084	0.013	6.03934e-08	AD	CYHR1
TSPOAP1	4.54986e-12	0.449077	0.417	0.213	6.15459e-08	AD	TSPOAP1
NADK2	5.13247e-12	0.48592	0.276	0.12	6.94269e-08	AD	NADK2
DGCR2	5.7841e-12	1.74602	0.079	0.011	7.82415e-08	AD	DGCR2
FAT3	5.79942e-12	1.33226	0.092	0.017	7.84487e-08	AD	FAT3
MTFR1L	6.04429e-12	1.10643	0.122	0.031	8.17612e-08	AD	MTFR1L
SCAF1	6.47957e-12	3.23342	0.059	0.004	8.76491e-08	AD	SCAF1
RSRP1	6.5288e-12	0.631432	0.192	0.069	8.83151e-08	AD	RSRP1
ZMIZ1	6.57206e-12	1.28707	0.113	0.027	8.89003e-08	AD	ZMIZ1
TMEM176A	7.16192e-12	1.26463	0.119	0.03	9.68793e-08	AD	TMEM176A
ARL6IP5	7.54891e-12	0.831577	0.199	0.073	1.02114e-07	AD	ARL6IP5
MBNL2	7.60305e-12	1.19736	0.159	0.052	1.02846e-07	AD	MBNL2
VPS45	7.80998e-12	1.01188	0.147	0.044	1.05646e-07	AD	VPS45
TTC12	7.90149e-12	1.94214	0.075	0.01	1.06883e-07	AD	TTC12
NRSN2	7.96938e-12	0.946107	0.154	0.048	1.07802e-07	AD	NRSN2
SALL2	8.1805e-12	0.369476	0.379	0.184	1.10658e-07	AD	SALL2
CHPT1	8.3924e-12	0.713538	0.185	0.066	1.13524e-07	AD	CHPT1
ABCA3	8.45843e-12	2.28008	0.075	0.01	1.14417e-07	AD	ABCA3
EIF4B	8.5099e-12	0.527097	0.34	0.16	1.15113e-07	AD	EIF4B
ZNF219	8.68163e-12	2.43531	0.07	0.008	1.17436e-07	AD	ZNF219
LUC7L	9.90427e-12	1.38764	0.127	0.035	1.33975e-07	AD	LUC7L
LENG8	1.02201e-11	0.875046	0.173	0.059	1.38248e-07	AD	LENG8
TMEM176B	1.04476e-11	1.09511	0.159	0.053	1.41324e-07	AD	TMEM176B
NPDC1	1.04821e-11	1.69005	0.089	0.016	1.41791e-07	AD	NPDC1
AKAP9	1.06982e-11	1.8739	0.091	0.017	1.44714e-07	AD	AKAP9
ATP13A2	1.10661e-11	4.67392	0.049	0.001	1.49691e-07	AD	ATP13A2
MGLL	1.10661e-11	4.03527	0.049	0.001	1.49691e-07	AD	MGLL
PSMA1	1.16067e-11	0.708482	0.211	0.082	1.57004e-07	AD	PSMA1
SEMA4A	1.18482e-11	2.29315	0.072	0.009	1.60271e-07	AD	SEMA4A
C31	1.23158e-11	0.741341	0.173	0.06	1.66596e-07	AD	C3
CTSB	1.25019e-11	0.93605	0.169	0.058	1.69114e-07	AD	CTSB
BCL6	1.30865e-11	0.364038	0.515	0.281	1.77021e-07	AD	BCL6
MLF2	1.33469e-11	0.92235	0.199	0.076	1.80543e-07	AD	MLF2
C6orf62	1.40408e-11	0.950394	0.155	0.05	1.8993e-07	AD	C6orf62
TPD52L2	1.53847e-11	2.11469	0.079	0.012	2.08109e-07	AD	TPD52L2
ATP6V1H	1.5399e-11	0.381598	0.548	0.296	2.08302e-07	AD	ATP6V1H
BAZ1B	1.57389e-11	2.06564	0.087	0.016	2.129e-07	AD	BAZ1B
TMUB2	1.62744e-11	1.56724	0.094	0.019	2.20144e-07	AD	TMUB2
FGF1	1.82476e-11	0.350586	0.585	0.331	2.46836e-07	AD	FGF1
SLC6A1	1.92718e-11	0.592151	0.41	0.215	2.6069e-07	AD	SLC6A1
MBP	1.98111e-11	0.439905	0.728	0.452	2.67984e-07	AD	MBP
LAMP1	2.06011e-11	1.06685	0.15	0.048	2.78671e-07	AD	LAMP1
STK11	2.06948e-11	3.44309	0.054	0.003	2.79938e-07	AD	STK11
PSMB7	2.08995e-11	0.742196	0.194	0.073	2.82708e-07	AD	PSMB7
TUBG2	2.12464e-11	1.86974	0.073	0.01	2.874e-07	AD	TUBG2
GNG12	2.13208e-11	0.772292	0.14	0.042	2.88407e-07	AD	GNG12
DBN1	2.14193e-11	3.21361	0.054	0.003	2.89739e-07	AD	DBN1
MNAT1	2.15354e-11	2.36144	0.063	0.006	2.91309e-07	AD	MNAT1
TMEM8B	2.36344e-11	1.81968	0.089	0.017	3.19702e-07	AD	TMEM8B
GPBP1	2.49237e-11	4.08828	0.051	0.002	3.37142e-07	AD	GPBP1
ZEB2	2.50867e-11	4.07675	0.051	0.002	3.39348e-07	AD	ZEB2
LIMK1	2.73836e-11	5.00538	0.047	0.001	3.70418e-07	AD	LIMK1
MCRIP1	2.81994e-11	0.661017	0.175	0.061	3.81454e-07	AD	MCRIP1
ERC1	2.82812e-11	0.43751	0.494	0.262	3.8256e-07	AD	ERC1
SLC41A1	2.84463e-11	1.1506	0.098	0.021	3.84793e-07	AD	SLC41A1
TAOK2	2.92913e-11	2.40038	0.07	0.009	3.96223e-07	AD	TAOK2
ZMYM2	2.99294e-11	1.53614	0.091	0.018	4.04855e-07	AD	ZMYM2
ARPC2	2.99417e-11	1.54925	0.124	0.035	4.05021e-07	AD	ARPC2
ABCA2	3.03213e-11	1.31416	0.098	0.021	4.10156e-07	AD	ABCA2
LZTS3	3.0726e-11	1.0943	0.12	0.032	4.15631e-07	AD	LZTS3
SSU72	3.14492e-11	2.70763	0.065	0.007	4.25413e-07	AD	SSU72
ATP2B4	3.21674e-11	0.951653	0.152	0.05	4.35128e-07	AD	ATP2B4
SRSF2	3.25872e-11	2.46467	0.065	0.007	4.40807e-07	AD	SRSF2
KHSRP	3.26764e-11	2.51486	0.065	0.007	4.42013e-07	AD	KHSRP
UBQLN1	3.39108e-11	0.791867	0.178	0.064	4.58711e-07	AD	UBQLN1
ARFGAP1	3.41988e-11	1.46122	0.091	0.018	4.62608e-07	AD	ARFGAP1
WDTC1	3.50293e-11	1.86869	0.084	0.015	4.73841e-07	AD	WDTC1
SRSF5	3.69971e-11	0.357124	0.384	0.187	5.0046e-07	AD	SRSF5
BTBD7	3.72692e-11	2.06379	0.086	0.016	5.04141e-07	AD	BTBD7
CLASP1	3.9559e-11	1.56694	0.092	0.019	5.35115e-07	AD	CLASP1
ANKRD11	3.99126e-11	2.36155	0.072	0.01	5.39898e-07	AD	ANKRD11
SPON1	4.12038e-11	0.447345	0.277	0.126	5.57364e-07	AD	SPON1
ILF3	4.21788e-11	1.12164	0.15	0.05	5.70552e-07	AD	ILF3
RAB2A	4.24528e-11	1.03384	0.173	0.063	5.74259e-07	AD	RAB2A
CELF1	4.71491e-11	1.01368	0.164	0.058	6.37786e-07	AD	CELF1
GSTM3	4.75517e-11	1.03069	0.183	0.07	6.43232e-07	AD	GSTM3
ATXN1	4.80181e-11	2.22918	0.066	0.008	6.49541e-07	AD	ATXN1
PPP6R1	4.82095e-11	2.5203	0.066	0.008	6.5213e-07	AD	PPP6R1
P4HB	5.11117e-11	3.31733	0.052	0.003	6.91388e-07	AD	P4HB
MIB1	5.25457e-11	2.2536	0.066	0.008	7.10785e-07	AD	MIB1
GNG7	5.26654e-11	1.32466	0.108	0.027	7.12405e-07	AD	GNG7
GRK3	5.30384e-11	1.69094	0.098	0.022	7.17451e-07	AD	GRK3
KIAA0319	5.37225e-11	1.08053	0.145	0.047	7.26704e-07	AD	KIAA0319
PPP2R5C	5.74641e-11	0.827486	0.213	0.087	7.77317e-07	AD	PPP2R5C
LYNX1	5.75164e-11	1.42037	0.098	0.022	7.78024e-07	AD	LYNX1
FNDC4	6.04156e-11	1.42386	0.098	0.022	8.17242e-07	AD	FNDC4
UBE2E3	6.16083e-11	0.969398	0.161	0.056	8.33376e-07	AD	UBE2E3
SASH1	6.246e-11	0.716818	0.178	0.066	8.44897e-07	AD	SASH1
ARHGAP21	6.25214e-11	0.866025	0.176	0.065	8.45727e-07	AD	ARHGAP21
RNF208	6.38612e-11	1.49228	0.087	0.017	8.63851e-07	AD	RNF208
WDFY3	6.58092e-11	1.93696	0.073	0.011	8.90202e-07	AD	WDFY3
BCL2L13	6.60638e-11	0.987519	0.162	0.057	8.93645e-07	AD	BCL2L13
GLUD11	6.6522e-11	0.369765	0.239	0.101	8.99843e-07	AD	GLUD1
COPA	6.91801e-11	2.25476	0.068	0.009	9.35799e-07	AD	COPA
KIAA0319L	6.97606e-11	2.94343	0.058	0.005	9.43652e-07	AD	KIAA0319L
FER	7.01647e-11	2.87833	0.058	0.005	9.49118e-07	AD	FER
SMARCA2	7.03559e-11	1.29383	0.098	0.022	9.51704e-07	AD	SMARCA2
ZNRF3	7.24729e-11	0.542575	0.272	0.123	9.80341e-07	AD	ZNRF3
UQCRC2	7.28997e-11	0.433996	0.295	0.137	9.86114e-07	AD	UQCRC2
ZNF532	7.63531e-11	1.80426	0.091	0.019	1.03283e-06	AD	ZNF532
DHRS3	7.69815e-11	0.738557	0.131	0.039	1.04133e-06	AD	DHRS3
SAP18	9.03703e-11	1.57109	0.11	0.029	1.22244e-06	AD	SAP18
ARRDC4	9.4036e-11	1.46682	0.108	0.028	1.27202e-06	AD	ARRDC4
PPP1R1A	9.84765e-11	0.844348	0.188	0.074	1.33209e-06	AD	PPP1R1A
ACTR1B	1.02453e-10	0.888313	0.175	0.065	1.38589e-06	AD	ACTR1B
OTUB1	1.03045e-10	0.383529	0.581	0.332	1.39389e-06	AD	OTUB1
TEAD1	1.13216e-10	1.39677	0.096	0.022	1.53147e-06	AD	TEAD1
KCTD15	1.13317e-10	1.04413	0.106	0.027	1.53283e-06	AD	KCTD15
SLC44A2	1.16822e-10	0.841062	0.197	0.079	1.58025e-06	AD	SLC44A2
PHYHD1	1.16866e-10	0.313336	0.539	0.306	1.58085e-06	AD	PHYHD1
TCF25	1.17141e-10	0.390142	0.293	0.135	1.58457e-06	AD	TCF25
RAB14	1.21308e-10	1.47392	0.096	0.022	1.64093e-06	AD	RAB14
HOMER3	1.21437e-10	1.32668	0.112	0.03	1.64268e-06	AD	HOMER3
EIF1	1.22516e-10	1.37312	0.108	0.028	1.65727e-06	AD	EIF1
PCYOX1	1.27529e-10	1.21865	0.086	0.017	1.72508e-06	AD	PCYOX1
DEF8	1.27874e-10	1.4777	0.096	0.022	1.72976e-06	AD	DEF8
BCAT2	1.28172e-10	1.32041	0.099	0.024	1.73379e-06	AD	BCAT2
PDGFRB	1.29144e-10	0.906664	0.122	0.035	1.74693e-06	AD	PDGFRB
LRP10	1.3713e-10	2.0721	0.072	0.011	1.85495e-06	AD	LRP10
ULK2	1.42797e-10	1.51825	0.098	0.023	1.93161e-06	AD	ULK2
MSI1	1.45653e-10	0.880495	0.152	0.052	1.97024e-06	AD	MSI1
H2AFV	1.46551e-10	1.49359	0.098	0.023	1.9824e-06	AD	H2AFV
AP2B1	1.5397e-10	0.649334	0.166	0.059	2.08275e-06	AD	AP2B1
LCAT	1.54644e-10	2.3208	0.066	0.009	2.09187e-06	AD	LCAT
CLYBL	1.55835e-10	2.20477	0.066	0.009	2.10798e-06	AD	CLYBL
OBSL1	1.6217e-10	0.827939	0.141	0.046	2.19367e-06	AD	OBSL1
SSR1	1.66894e-10	1.45357	0.087	0.018	2.25758e-06	AD	SSR1
PPARA	1.66983e-10	2.59371	0.056	0.005	2.25877e-06	AD	PPARA
MCFD2	1.70008e-10	0.770979	0.168	0.061	2.2997e-06	AD	MCFD2
C11orf95	1.70865e-10	5.14829	0.044	0.001	2.31129e-06	AD	C11orf95
HINT1	1.77031e-10	0.967671	0.14	0.045	2.3947e-06	AD	HINT1
NFIB	1.7847e-10	0.482486	0.325	0.158	2.41417e-06	AD	NFIB
DDIT4	1.80981e-10	0.364885	0.309	0.147	2.44813e-06	AD	DDIT4
BMP2K	1.81322e-10	0.733892	0.164	0.059	2.45275e-06	AD	BMP2K
NDST1	1.83996e-10	2.5237	0.061	0.007	2.48891e-06	AD	NDST1
GPAM	1.90118e-10	1.09805	0.126	0.038	2.57172e-06	AD	GPAM
ATP5MC3	1.95185e-10	0.783506	0.173	0.064	2.64027e-06	AD	ATP5MC3
OGDH	2.03044e-10	0.768108	0.164	0.059	2.74658e-06	AD	OGDH
PDE4DIP	2.11085e-10	0.32852	0.415	0.218	2.85534e-06	AD	PDE4DIP
MDH1	2.1922e-10	0.393136	0.581	0.331	2.96539e-06	AD	MDH1
CRY2	2.28172e-10	0.952335	0.145	0.049	3.08649e-06	AD	CRY2
POM121C	2.33631e-10	2.09259	0.068	0.01	3.16033e-06	AD	POM121C
NEK1	2.33802e-10	3.01699	0.052	0.004	3.16265e-06	AD	NEK1
VEGFB	2.36738e-10	1.95186	0.075	0.013	3.20236e-06	AD	VEGFB
PIK3R1	2.40975e-10	1.3707	0.082	0.016	3.25967e-06	AD	PIK3R1
TMEM33	2.43712e-10	2.78954	0.052	0.004	3.29669e-06	AD	TMEM33
RASGEF1A	2.47435e-10	1.78018	0.075	0.013	3.34706e-06	AD	RASGEF1A
SNX21	2.62882e-10	0.796512	0.138	0.045	3.55601e-06	AD	SNX21
TOM1L2	2.79187e-10	0.605305	0.176	0.067	3.77657e-06	AD	TOM1L2
CLIP3	2.82327e-10	1.4731	0.096	0.023	3.81904e-06	AD	CLIP3
ZMIZ2	2.83776e-10	0.850137	0.138	0.045	3.83864e-06	AD	ZMIZ2
ANKRD40	3.12292e-10	3.52039	0.049	0.003	4.22437e-06	AD	ANKRD40
ARHGAP39	3.29681e-10	0.609443	0.171	0.064	4.45959e-06	AD	ARHGAP39
FAM168B	3.37554e-10	1.78246	0.07	0.011	4.56609e-06	AD	FAM168B
BRSK1	3.40498e-10	0.834418	0.129	0.04	4.60591e-06	AD	BRSK1
MKLN1	3.47708e-10	0.652872	0.213	0.09	4.70345e-06	AD	MKLN1
PIN1	3.71918e-10	1.20233	0.126	0.039	5.03094e-06	AD	PIN1
TMEM259	3.74842e-10	1.03809	0.122	0.037	5.07049e-06	AD	TMEM259
SAR1A	3.85068e-10	3.95322	0.045	0.002	5.20881e-06	AD	SAR1A
RNF40	3.87957e-10	1.19403	0.087	0.019	5.24789e-06	AD	RNF40
CA11	3.92118e-10	2.14563	0.065	0.009	5.30418e-06	AD	CA11
ARHGEF40	3.92314e-10	0.660157	0.096	0.023	5.30683e-06	AD	ARHGEF40
DNAJC5	3.9827e-10	1.3749	0.101	0.026	5.38739e-06	AD	DNAJC5
ULK1	4.13786e-10	2.6918	0.054	0.005	5.59728e-06	AD	ULK1
ESD	4.17328e-10	0.956296	0.145	0.05	5.64519e-06	AD	ESD
RMDN3	4.34129e-10	1.6883	0.072	0.012	5.87247e-06	AD	RMDN3
MYO10	4.48496e-10	1.13874	0.099	0.025	6.0668e-06	AD	MYO10
RXRA	4.90411e-10	0.131156	0.342	0.166	6.63378e-06	AD	RXRA
C16orf58	4.93977e-10	1.23634	0.101	0.026	6.68203e-06	AD	C16orf58
ZFHX4	5.12543e-10	1.21853	0.113	0.033	6.93316e-06	AD	ZFHX4
WWOX	5.38703e-10	0.714996	0.169	0.065	7.28703e-06	AD	WWOX
SYT17	5.40955e-10	0.731946	0.161	0.06	7.3175e-06	AD	SYT17
OGDHL	5.76806e-10	1.45143	0.094	0.023	7.80245e-06	AD	OGDHL
PDK2	6.02747e-10	1.4169	0.094	0.023	8.15336e-06	AD	PDK2
CPEB2	6.2753e-10	2.33992	0.061	0.008	8.4886e-06	AD	CPEB2
ANKRD36C	6.42291e-10	2.17214	0.061	0.008	8.68827e-06	AD	ANKRD36C
ZDHHC8	6.45617e-10	2.2661	0.061	0.008	8.73326e-06	AD	ZDHHC8
FAM168A	6.45985e-10	0.481821	0.393	0.212	8.73823e-06	AD	FAM168A
NDUFA3	6.53772e-10	1.10579	0.115	0.034	8.84358e-06	AD	NDUFA3
AP5B1	6.54609e-10	2.59489	0.056	0.006	8.85489e-06	AD	AP5B1
SLC25A11	6.6577e-10	1.15655	0.126	0.04	9.00587e-06	AD	SLC25A11
POM121	6.70957e-10	2.42899	0.056	0.006	9.07604e-06	AD	POM121
ENHO	6.79699e-10	0.329763	0.679	0.45	9.19429e-06	AD	ENHO
PRKG1	6.95352e-10	0.58068	0.253	0.12	9.40603e-06	AD	PRKG1
NUPR1	7.20942e-10	0.294509	0.419	0.224	9.75219e-06	AD	NUPR1
TP53BP2	7.42075e-10	1.14122	0.086	0.019	1.00381e-05	AD	TP53BP2
IFITM3	7.45143e-10	0.767319	0.19	0.077	1.00796e-05	AD	IFITM3
PAFAH1B2	7.68725e-10	1.912	0.068	0.011	1.03985e-05	AD	PAFAH1B2
TNS2	7.77197e-10	3.18376	0.047	0.003	1.05131e-05	AD	TNS2
BHLHE41	8.09871e-10	2.39606	0.063	0.009	1.09551e-05	AD	BHLHE41
PSMA4	8.27692e-10	1.49597	0.086	0.019	1.11962e-05	AD	PSMA4
FADS2	8.78253e-10	0.27122	0.405	0.215	1.18801e-05	AD	FADS2
BCL2	9.03243e-10	0.699964	0.182	0.073	1.22182e-05	AD	BCL2
SEC23A	9.5457e-10	2.66368	0.065	0.01	1.29125e-05	AD	SEC23A
CTNND2	9.58565e-10	0.303987	0.682	0.424	1.29665e-05	AD	CTNND2
MAP4	9.64408e-10	0.318362	0.508	0.284	1.30455e-05	AD	MAP4
DGKB	9.68584e-10	1.9073	0.07	0.012	1.3102e-05	AD	DGKB
DOCK4	9.76308e-10	0.338853	0.344	0.175	1.32065e-05	AD	DOCK4
VPS28	9.87878e-10	2.41199	0.058	0.007	1.3363e-05	AD	VPS28
NTRK3	9.97472e-10	0.948413	0.173	0.069	1.34928e-05	AD	NTRK3
NKAIN3	9.97522e-10	0.301304	0.269	0.126	1.34935e-05	AD	NKAIN3
SYNGAP1	9.99575e-10	0.697772	0.164	0.062	1.35212e-05	AD	SYNGAP1
ATG9A	1.05192e-09	8.00097	0.037	0	1.42293e-05	AD	ATG9A
SRRT	1.05336e-09	1.16699	0.105	0.029	1.42488e-05	AD	SRRT
ECE1	1.05528e-09	2.39487	0.065	0.01	1.42748e-05	AD	ECE1
CCNL2	1.14146e-09	0.558349	0.216	0.095	1.54405e-05	AD	CCNL2
WLS	1.16894e-09	0.513234	0.325	0.167	1.58123e-05	AD	WLS
RABL6	1.17302e-09	0.756302	0.14	0.048	1.58674e-05	AD	RABL6
MXD4	1.18933e-09	1.6654	0.082	0.018	1.60881e-05	AD	MXD4
ADAR	1.19801e-09	2.16748	0.065	0.01	1.62055e-05	AD	ADAR
AGFG2	1.20532e-09	0.480303	0.206	0.088	1.63044e-05	AD	AGFG2
IZUMO4	1.28869e-09	0.677994	0.155	0.058	1.74321e-05	AD	IZUMO4
DZIP1	1.29404e-09	1.73827	0.072	0.013	1.75045e-05	AD	DZIP1
KAT2B	1.30767e-09	1.75769	0.065	0.01	1.76888e-05	AD	KAT2B
RAB5B	1.38879e-09	0.670506	0.215	0.094	1.87861e-05	AD	RAB5B
JAKMIP2	1.42305e-09	1.84175	0.073	0.014	1.92496e-05	AD	JAKMIP2
FUS	1.43953e-09	1.11131	0.113	0.034	1.94725e-05	AD	FUS
FIBIN	1.44375e-09	1.4481	0.084	0.019	1.95295e-05	AD	FIBIN
PLEKHB2	1.46251e-09	1.46936	0.082	0.018	1.97834e-05	AD	PLEKHB2
CACHD1	1.48453e-09	0.87171	0.155	0.059	2.00812e-05	AD	CACHD1
PLEKHO2	1.48742e-09	0.677686	0.171	0.068	2.01204e-05	AD	PLEKHO2
RNF187	1.48764e-09	0.528932	0.236	0.106	2.01233e-05	AD	RNF187
SYNPO2	1.49478e-09	0.755436	0.148	0.054	2.02199e-05	AD	SYNPO2
TTC3	1.50704e-09	0.402385	0.48	0.268	2.03857e-05	AD	TTC3
PI4KB	1.51007e-09	2.45285	0.054	0.006	2.04267e-05	AD	PI4KB
PARD3	1.52076e-09	0.26537	0.187	0.075	2.05714e-05	AD	PARD3
TMEM129	1.54043e-09	1.92624	0.066	0.011	2.08373e-05	AD	TMEM129
R3HDM2	1.56231e-09	1.94223	0.059	0.008	2.11333e-05	AD	R3HDM2
FOXO1	1.56653e-09	2.52167	0.054	0.006	2.11905e-05	AD	FOXO1
NFAT5	1.57802e-09	0.663491	0.178	0.071	2.13458e-05	AD	NFAT5
LNPEP	1.5815e-09	2.2886	0.054	0.006	2.1393e-05	AD	LNPEP
STUB1	1.68496e-09	1.32685	0.105	0.03	2.27925e-05	AD	STUB1
PMPCB	1.72427e-09	1.48124	0.086	0.02	2.33242e-05	AD	PMPCB
RNF146	1.74027e-09	1.78834	0.075	0.015	2.35406e-05	AD	RNF146
SHISA4	1.75417e-09	0.834909	0.136	0.047	2.37287e-05	AD	SHISA4
POMGNT2	1.77605e-09	2.44112	0.061	0.009	2.40246e-05	AD	POMGNT2
KCNJ10	1.80014e-09	0.337705	0.49	0.282	2.43505e-05	AD	KCNJ10
FAM229B	1.84851e-09	0.963024	0.122	0.039	2.50048e-05	AD	FAM229B
NCOA1	1.86099e-09	0.788802	0.136	0.047	2.51737e-05	AD	NCOA1
HSPA9	1.86727e-09	0.838133	0.145	0.052	2.52586e-05	AD	HSPA9
ARHGAP26	1.87798e-09	1.34692	0.119	0.038	2.54034e-05	AD	ARHGAP26
AP3D1	1.88387e-09	0.435541	0.209	0.09	2.54832e-05	AD	AP3D1
ANAPC16	1.89748e-09	1.22639	0.106	0.031	2.56672e-05	AD	ANAPC16
SAMD1	1.90735e-09	3.18296	0.045	0.003	2.58007e-05	AD	SAMD1
WWC1	1.9435e-09	0.344787	0.356	0.185	2.62897e-05	AD	WWC1
SLC9A3R1	1.95084e-09	0.314234	0.449	0.248	2.6389e-05	AD	SLC9A3R1
ZCRB1	2.03459e-09	1.31458	0.106	0.031	2.75219e-05	AD	ZCRB1
DPCD	2.05124e-09	1.75713	0.068	0.012	2.77472e-05	AD	DPCD
LGI4	2.07126e-09	0.6635	0.204	0.089	2.80179e-05	AD	LGI4
DVL1	2.08226e-09	1.76627	0.068	0.012	2.81667e-05	AD	DVL1
PPP1R7	2.104e-09	1.81303	0.068	0.012	2.84608e-05	AD	PPP1R7
HIF1A	2.16907e-09	1.02356	0.159	0.062	2.9341e-05	AD	HIF1A
ANKRD46	2.23266e-09	1.17934	0.12	0.039	3.02012e-05	AD	ANKRD46
FLOT1	2.3014e-09	0.734271	0.211	0.094	3.1131e-05	AD	FLOT1
AMER2	2.31629e-09	0.606135	0.171	0.068	3.13324e-05	AD	AMER2
PLCE1	2.35533e-09	1.0355	0.131	0.045	3.18605e-05	AD	PLCE1
OAT	2.36182e-09	0.724707	0.201	0.088	3.19484e-05	AD	OAT
DDAH2	2.37887e-09	3.88662	0.042	0.002	3.21789e-05	AD	DDAH2
MAPK3	2.39347e-09	2.6608	0.051	0.005	3.23764e-05	AD	MAPK3
SOX21	2.42891e-09	1.52271	0.056	0.007	3.28559e-05	AD	SOX21
SF1	2.44614e-09	1.59779	0.079	0.017	3.3089e-05	AD	SF1
TMEM41B	2.61851e-09	2.11306	0.063	0.01	3.54205e-05	AD	TMEM41B
EPHB1	2.64151e-09	1.04047	0.11	0.033	3.57318e-05	AD	EPHB1
PANX2	2.64281e-09	8.02456	0.035	0	3.57492e-05	AD	PANX2
CAST	2.65924e-09	1.06255	0.115	0.036	3.59715e-05	AD	CAST
MGST3	2.66587e-09	0.326591	0.531	0.303	3.60613e-05	AD	MGST3
DLGAP4	2.68484e-09	4.90663	0.038	0.001	3.63179e-05	AD	DLGAP4
MFHAS1	2.6872e-09	1.17515	0.091	0.023	3.63497e-05	AD	MFHAS1
ASB6	2.71683e-09	4.45023	0.038	0.001	3.67506e-05	AD	ASB6
CELSR2	2.73528e-09	4.40202	0.038	0.001	3.70001e-05	AD	CELSR2
SET	2.83104e-09	1.07327	0.115	0.036	3.82955e-05	AD	SET
SLC18B1	2.89876e-09	1.1291	0.094	0.025	3.92115e-05	AD	SLC18B1
CHD4	2.90235e-09	1.25761	0.096	0.026	3.92601e-05	AD	CHD4
TTYH3	3.27645e-09	1.48137	0.072	0.014	4.43205e-05	AD	TTYH3
LARP7	3.34553e-09	2.75382	0.047	0.004	4.5255e-05	AD	LARP7
CARF	3.36503e-09	2.74453	0.047	0.004	4.55188e-05	AD	CARF
RBM33	3.36503e-09	2.65793	0.047	0.004	4.55188e-05	AD	RBM33
PC	3.40912e-09	0.43436	0.138	0.049	4.61151e-05	AD	PC
RABEP1	3.42748e-09	1.59877	0.072	0.014	4.63635e-05	AD	RABEP1
LTBP3	3.42965e-09	0.532973	0.29	0.148	4.63928e-05	AD	LTBP3
SERPINE2	3.46718e-09	0.248967	0.405	0.218	4.69005e-05	AD	SERPINE2
ATP13A4	3.50628e-09	0.423367	0.332	0.172	4.74294e-05	AD	ATP13A4
ABI2	3.54008e-09	1.08165	0.094	0.025	4.78866e-05	AD	ABI2
EIF4G1	3.63921e-09	0.547437	0.232	0.107	4.92276e-05	AD	EIF4G1
PLCG1	3.64716e-09	0.764605	0.133	0.046	4.93351e-05	AD	PLCG1
SPRED1	3.65622e-09	2.53076	0.052	0.006	4.94577e-05	AD	SPRED1
KCNIP2	3.89328e-09	0.836564	0.143	0.052	5.26644e-05	AD	KCNIP2
HDLBP	3.90776e-09	0.483611	0.194	0.082	5.28602e-05	AD	HDLBP
CCM2	3.93184e-09	2.11977	0.052	0.006	5.3186e-05	AD	CCM2
MMD2	4.08231e-09	1.21204	0.084	0.02	5.52214e-05	AD	MMD2
RHPN11	4.12154e-09	0.179381	0.288	0.143	5.57521e-05	AD	RHPN1
GRAMD1B	4.2261e-09	1.16337	0.098	0.027	5.71664e-05	AD	GRAMD1B
PADI2	4.2468e-09	0.167078	0.272	0.129	5.74465e-05	AD	PADI2
DDX24	4.34641e-09	0.902642	0.148	0.056	5.87939e-05	AD	DDX24
WASF2	4.4622e-09	1.88825	0.066	0.012	6.03602e-05	AD	WASF2
TXN2	4.50401e-09	1.22593	0.112	0.035	6.09257e-05	AD	TXN2
CRIP2	4.61659e-09	3.27992	0.044	0.003	6.24486e-05	AD	CRIP2
HP1BP3	4.62219e-09	0.53835	0.222	0.101	6.25243e-05	AD	HP1BP3
TRA2A	4.65153e-09	0.530664	0.239	0.113	6.29212e-05	AD	TRA2A
ECHS1	4.72615e-09	0.45191	0.227	0.104	6.39307e-05	AD	ECHS1
UBE2H	4.81654e-09	1.65859	0.077	0.017	6.51533e-05	AD	UBE2H
ANXA6	5.12963e-09	0.83391	0.175	0.073	6.93885e-05	AD	ANXA6
ADCY8	5.14439e-09	0.841399	0.129	0.045	6.95882e-05	AD	ADCY8
LAMTOR1	5.55498e-09	1.35758	0.077	0.017	7.51422e-05	AD	LAMTOR1
SMARCC2	5.57989e-09	1.14481	0.087	0.022	7.54791e-05	AD	SMARCC2
CAMTA2	5.58975e-09	2.73166	0.049	0.005	7.56125e-05	AD	CAMTA2
MARCKSL1	5.61388e-09	2.30532	0.054	0.007	7.59389e-05	AD	MARCKSL1
KLHDC3	5.65224e-09	2.81875	0.049	0.005	7.64578e-05	AD	KLHDC3
FBXW5	5.69378e-09	2.19191	0.061	0.01	7.70197e-05	AD	FBXW5
BAD	5.69955e-09	2.63438	0.049	0.005	7.70977e-05	AD	BAD
ALDH6A1	5.72777e-09	0.314714	0.302	0.152	7.74795e-05	AD	ALDH6A1
FASTK	5.74579e-09	4.14276	0.04	0.002	7.77234e-05	AD	FASTK
SH3BGRL2	5.8276e-09	2.61723	0.049	0.005	7.883e-05	AD	SH3BGRL2
LDB1	5.87828e-09	1.68816	0.068	0.013	7.95154e-05	AD	LDB1
ZNF846	5.93155e-09	3.73834	0.04	0.002	8.0236e-05	AD	ZNF846
DNM1	6.04579e-09	3.52763	0.04	0.002	8.17814e-05	AD	DNM1
STAU2	6.19972e-09	1.37042	0.096	0.027	8.38635e-05	AD	STAU2
SELENBP1	6.26782e-09	0.590044	0.211	0.096	8.47849e-05	AD	SELENBP1
SH3PXD2B	6.44527e-09	0.481551	0.171	0.07	8.71851e-05	AD	SH3PXD2B
NOP53	6.63966e-09	7.62851	0.033	0	8.98147e-05	AD	NOP53
TMEM158	6.63967e-09	7.99504	0.033	0	8.98148e-05	AD	TMEM158
MARK3	6.95451e-09	0.822124	0.12	0.04	9.40737e-05	AD	MARK3
YKT6	7.17446e-09	0.92316	0.092	0.025	9.70489e-05	AD	YKT6
GM2A	7.18878e-09	1.85777	0.072	0.015	9.72426e-05	AD	GM2A
SH3GLB2	7.22031e-09	0.481026	0.262	0.128	9.76691e-05	AD	SH3GLB2
HNRNPD	7.38529e-09	1.03355	0.133	0.048	9.99008e-05	AD	HNRNPD
FKBP5	7.4877e-09	2.42241	0.056	0.008	0.000101286	AD	FKBP5
CTSF	7.56167e-09	0.713889	0.127	0.044	0.000102287	AD	CTSF
COL21A1	7.6705e-09	1.74214	0.091	0.025	0.000103759	AD	COL21A1
DAPK1	7.74914e-09	0.592025	0.218	0.101	0.000104823	AD	DAPK1
OPTN	8.12881e-09	1.88473	0.063	0.011	0.000109958	AD	OPTN
GPSM1	8.16654e-09	1.61034	0.063	0.011	0.000110469	AD	GPSM1
LAMB2	8.32072e-09	2.71137	0.045	0.004	0.000112554	AD	LAMB2
EIF4G3	8.44141e-09	2.60637	0.045	0.004	0.000114187	AD	EIF4G3
ITPR2	8.451e-09	1.14757	0.082	0.02	0.000114317	AD	ITPR2
TRIM44	8.49705e-09	1.62922	0.072	0.015	0.00011494	AD	TRIM44
POU6F1	8.50567e-09	2.66175	0.051	0.006	0.000115056	AD	POU6F1
CHTOP	8.59702e-09	1.67133	0.073	0.016	0.000116292	AD	CHTOP
IL6ST	8.76845e-09	0.812419	0.143	0.054	0.000118611	AD	IL6ST
PGGHG	9.10432e-09	1.66042	0.051	0.006	0.000123154	AD	PGGHG
COPS7B	9.36701e-09	1.67101	0.075	0.017	0.000126708	AD	COPS7B
CLASP2	9.43859e-09	1.10824	0.108	0.034	0.000127676	AD	CLASP2
BRK1	9.53986e-09	0.560375	0.241	0.115	0.000129046	AD	BRK1
GLG1	9.59568e-09	0.864694	0.15	0.059	0.000129801	AD	GLG1
FAM219A	9.6792e-09	1.80487	0.075	0.017	0.00013093	AD	FAM219A
HDDC2	9.772e-09	1.18186	0.12	0.042	0.000132186	AD	HDDC2
SORBS3	9.78335e-09	1.37804	0.073	0.016	0.000132339	AD	SORBS3
CHP1	9.80647e-09	2.08423	0.058	0.009	0.000132652	AD	CHP1
CASTOR3	1.0172e-08	0.975173	0.105	0.032	0.000137596	AD	CASTOR3
RBM25	1.12908e-08	2.83425	0.042	0.003	0.00015273	AD	RBM25
PLPP3	1.14771e-08	0.265077	0.67	0.404	0.000155251	AD	PLPP3
ARHGEF3	1.20277e-08	2.47189	0.052	0.007	0.000162698	AD	ARHGEF3
PACS1	1.24572e-08	1.13921	0.115	0.039	0.000168508	AD	PACS1
ST13	1.27155e-08	1.20303	0.106	0.034	0.000172002	AD	ST13
CASTOR1	1.28419e-08	1.38231	0.066	0.013	0.000173712	AD	CASTOR1
MKNK2	1.31259e-08	1.9427	0.052	0.007	0.000177554	AD	MKNK2
TAX1BP3	1.31997e-08	2.66972	0.047	0.005	0.000178553	AD	TAX1BP3
MAPKAP1	1.31997e-08	2.5724	0.047	0.005	0.000178553	AD	MAPKAP1
ASXL2	1.32361e-08	2.67947	0.047	0.005	0.000179045	AD	ASXL2
HNRNPU	1.37348e-08	1.52928	0.079	0.019	0.000185791	AD	HNRNPU
COMT	1.37739e-08	0.376402	0.234	0.11	0.000186319	AD	COMT
ARL6IP4	1.37746e-08	0.431093	0.332	0.178	0.000186329	AD	ARL6IP4
RAB11A	1.3802e-08	0.500036	0.276	0.141	0.0001867	AD	RAB11A
MAF	1.39716e-08	1.82006	0.059	0.01	0.000188994	AD	MAF
SERBP1	1.4137e-08	1.90401	0.059	0.01	0.000191232	AD	SERBP1
PCDH10	1.46335e-08	3.65192	0.038	0.002	0.000197948	AD	PCDH10
DAGLA	1.48199e-08	3.27554	0.038	0.002	0.000200469	AD	DAGLA
SESN3	1.48231e-08	0.804609	0.136	0.051	0.000200512	AD	SESN3
DYNLL2	1.49004e-08	0.254537	0.546	0.312	0.000201558	AD	DYNLL2
PIK3IP1	1.52664e-08	1.59665	0.068	0.014	0.000206508	AD	PIK3IP1
AZIN1	1.52869e-08	0.488739	0.202	0.091	0.000206786	AD	AZIN1
INPPL1	1.5398e-08	1.28668	0.068	0.014	0.000208288	AD	INPPL1
FUT9	1.56488e-08	0.291976	0.417	0.233	0.000211681	AD	FUT9
TBC1D9B	1.62831e-08	1.36458	0.08	0.02	0.000220262	AD	TBC1D9B
SERGEF	1.63116e-08	1.02406	0.115	0.039	0.000220647	AD	SERGEF
ALDOC	1.66831e-08	7.55665	0.031	0	0.000225672	AD	ALDOC
MGAT4B	1.67631e-08	4.776	0.035	0.001	0.000226754	AD	MGAT4B
PHACTR1	1.7105e-08	4.2379	0.035	0.001	0.000231379	AD	PHACTR1
ARF3	1.7105e-08	4.04043	0.035	0.001	0.000231379	AD	ARF3
SYVN1	1.82757e-08	1.49049	0.089	0.025	0.000247216	AD	SYVN1
CAMK1D	1.82784e-08	1.75852	0.061	0.011	0.000247252	AD	CAMK1D
PPP1CC	1.89517e-08	1.31238	0.091	0.026	0.00025636	AD	PPP1CC
GPR137	1.91631e-08	1.99785	0.054	0.008	0.000259219	AD	GPR137
MRNIP	1.99628e-08	2.04167	0.063	0.012	0.000270037	AD	MRNIP
GIGYF2	2.04553e-08	2.45382	0.044	0.004	0.000276699	AD	GIGYF2
MFSD11	2.04984e-08	0.79946	0.082	0.021	0.000277282	AD	MFSD11
NSG1	2.06431e-08	1.32166	0.084	0.022	0.000279239	AD	NSG1
ZNF423	2.08989e-08	2.1133	0.049	0.006	0.0002827	AD	ZNF423
CFAP70	2.10852e-08	1.805	0.063	0.012	0.00028522	AD	CFAP70
BCKDHB	2.11313e-08	0.273153	0.157	0.063	0.000285843	AD	BCKDHB
GOLM1	2.30081e-08	1.28215	0.106	0.035	0.00031123	AD	GOLM1
NEFL	2.39025e-08	1.17446	0.089	0.025	0.000323329	AD	NEFL
TOMM71	2.44717e-08	0.297004	0.632	0.379	0.000331029	AD	TOMM7
DCXR	2.45664e-08	0.439903	0.164	0.068	0.00033231	AD	DCXR
RBBP6	2.52533e-08	1.64274	0.079	0.02	0.000341601	AD	RBBP6
ARVCF	2.58277e-08	0.811745	0.087	0.024	0.000349371	AD	ARVCF
UQCC1	2.58504e-08	0.977072	0.119	0.042	0.000349679	AD	UQCC1
MTPN	2.59242e-08	0.821854	0.152	0.062	0.000350677	AD	MTPN
PNPLA2	2.60144e-08	1.03261	0.087	0.024	0.000351897	AD	PNPLA2
SLC39A11	2.72453e-08	0.520421	0.18	0.08	0.000368547	AD	SLC39A11
ENKUR	2.76318e-08	0.591181	0.134	0.051	0.000373775	AD	ENKUR
PCDH7	2.76438e-08	3.25052	0.04	0.003	0.000373938	AD	PCDH7
CSDE1	2.76438e-08	3.31184	0.04	0.003	0.000373938	AD	CSDE1
CRLF1	2.77265e-08	3.05901	0.04	0.003	0.000375056	AD	CRLF1
UBE2B	2.78367e-08	0.607937	0.138	0.052	0.000376548	AD	UBE2B
MAVS	2.78925e-08	3.18015	0.04	0.003	0.000377302	AD	MAVS
RAB5A	2.81332e-08	0.450174	0.279	0.145	0.000380558	AD	RAB5A
ADORA1	2.85289e-08	2.40315	0.051	0.007	0.00038591	AD	ADORA1
ANXA7	2.98288e-08	1.46093	0.065	0.013	0.000403494	AD	ANXA7
UBFD1	3.04207e-08	1.36015	0.077	0.019	0.0004115	AD	UBFD1
KIAA0100	3.05546e-08	1.98338	0.051	0.007	0.000413313	AD	KIAA0100
BBX	3.20194e-08	2.48806	0.045	0.005	0.000433127	AD	BBX
FUBP1	3.21069e-08	2.65579	0.045	0.005	0.000434309	AD	FUBP1
ZFAND6	3.22304e-08	0.910834	0.101	0.032	0.00043598	AD	ZFAND6
CSGALNACT1	3.23357e-08	0.914271	0.101	0.032	0.000437404	AD	CSGALNACT1
CCDC92	3.37073e-08	0.938143	0.112	0.038	0.000455959	AD	CCDC92
INTS3	3.43345e-08	1.00089	0.106	0.035	0.000464442	AD	INTS3
C1orf43	3.52289e-08	0.570271	0.208	0.098	0.000476542	AD	C1orf43
LRRC8A	3.5899e-08	0.418856	0.147	0.058	0.000485605	AD	LRRC8A
ABCC5	3.65204e-08	3.27917	0.037	0.002	0.000494012	AD	ABCC5
AGK	3.65204e-08	3.57607	0.037	0.002	0.000494012	AD	AGK
NOC2L	3.67509e-08	3.13755	0.037	0.002	0.000497129	AD	NOC2L
PRMT2	3.79422e-08	1.59206	0.068	0.015	0.000513244	AD	PRMT2
DEXI	3.79815e-08	1.51438	0.068	0.015	0.000513776	AD	DEXI
PHC1	3.81237e-08	1.35277	0.101	0.033	0.0005157	AD	PHC1
BCLAF1	3.99912e-08	1.31338	0.084	0.023	0.000540961	AD	BCLAF1
RNF130	4.03188e-08	2.13644	0.052	0.008	0.000545392	AD	RNF130
LRFN4	4.04178e-08	2.1504	0.052	0.008	0.000546731	AD	LRFN4
ACAP2	4.11617e-08	1.53616	0.07	0.016	0.000556794	AD	ACAP2
ZNF226	4.22191e-08	1.54094	0.07	0.016	0.000571097	AD	ZNF226
QARS	4.2329e-08	4.37512	0.033	0.001	0.000572584	AD	QARS
KCNAB2	4.26139e-08	4.3632	0.033	0.001	0.000576439	AD	KCNAB2
PRRX1	4.27068e-08	0.628801	0.161	0.068	0.000577694	AD	PRRX1
HES6	4.2731e-08	1.24712	0.068	0.015	0.000578022	AD	HES6
LONP2	4.35227e-08	1.49486	0.07	0.016	0.000588731	AD	LONP2
ATP6V1C1	4.48652e-08	1.88393	0.061	0.012	0.000606892	AD	ATP6V1C1
TNPO2	4.50283e-08	1.2023	0.094	0.029	0.000609098	AD	TNPO2
NCK2	4.51425e-08	3.34958	0.042	0.004	0.000610643	AD	NCK2
PPP5C	4.6322e-08	1.17726	0.089	0.026	0.000626598	AD	PPP5C
SYNM	4.66295e-08	0.862339	0.127	0.048	0.000630758	AD	SYNM
ZCCHC7	4.66797e-08	1.16286	0.084	0.023	0.000631436	AD	ZCCHC7
MAPKAPK2	4.6705e-08	2.85107	0.042	0.004	0.000631779	AD	MAPKAPK2
TCF4	4.6904e-08	2.95568	0.042	0.004	0.00063447	AD	TCF4
ITSN1	4.8669e-08	0.996465	0.091	0.027	0.000658346	AD	ITSN1
BET1L	4.97147e-08	2.11748	0.047	0.006	0.000672491	AD	BET1L
SNCAIP	5.05868e-08	1.57525	0.073	0.018	0.000684287	AD	SNCAIP
ETFA	5.1225e-08	2.03068	0.054	0.009	0.00069292	AD	ETFA
NDUFAB1	5.24441e-08	1.42833	0.075	0.019	0.000709412	AD	NDUFAB1
BLCAP	5.27043e-08	2.14037	0.054	0.009	0.000712931	AD	BLCAP
STIM1	5.28481e-08	1.51904	0.075	0.019	0.000714876	AD	STIM1
MDH2	5.35228e-08	1.92596	0.054	0.009	0.000724003	AD	MDH2
PSMD4	5.47306e-08	1.05255	0.112	0.039	0.000740341	AD	PSMD4
GPR37L1	5.87833e-08	0.225982	0.59	0.361	0.000795162	AD	GPR37L1
DMWD	6.05913e-08	1.67853	0.063	0.013	0.000819618	AD	DMWD
FJX1	6.21664e-08	0.915512	0.063	0.013	0.000840926	AD	FJX1
ZBTB18	6.27098e-08	1.05593	0.105	0.035	0.000848276	AD	ZBTB18
PHRF1	6.66848e-08	1.54223	0.065	0.014	0.000902045	AD	PHRF1
C18orf32	6.78978e-08	1.37925	0.079	0.021	0.000918454	AD	C18orf32
PABPC1	6.82326e-08	0.578827	0.215	0.103	0.000922982	AD	PABPC1
PER1	6.83478e-08	3.08948	0.038	0.003	0.00092454	AD	PER1
CHD6	6.8652e-08	2.73511	0.038	0.003	0.000928655	AD	CHD6
FOXK1	6.87537e-08	2.96252	0.038	0.003	0.000930032	AD	FOXK1
CD151	6.89576e-08	3.0837	0.038	0.003	0.000932789	AD	CD151
GRAMD1C	6.90377e-08	1.81731	0.049	0.007	0.000933873	AD	GRAMD1C
SCRG1	6.91306e-08	0.234973	0.492	0.286	0.00093513	AD	SCRG1
INTS1	7.09695e-08	1.97028	0.049	0.007	0.000960005	AD	INTS1
PAPOLA	7.1401e-08	0.922447	0.103	0.034	0.000965841	AD	PAPOLA
ENAH	7.16307e-08	1.24511	0.079	0.021	0.000968949	AD	ENAH
HEPACAM	7.21013e-08	0.274159	0.656	0.412	0.000975314	AD	HEPACAM
NPEPPS	7.44481e-08	1.23821	0.08	0.022	0.00100706	AD	NPEPPS
DENND1A	7.44958e-08	2.46663	0.044	0.005	0.0010077	AD	DENND1A
MYLK	7.71062e-08	0.278165	0.518	0.313	0.00104301	AD	MYLK
SF3B1	7.88136e-08	1.30122	0.092	0.029	0.00106611	AD	SF3B1
MAGI2	7.89481e-08	1.76016	0.058	0.011	0.00106793	AD	MAGI2
RNPS1	7.91181e-08	1.19782	0.079	0.021	0.00107023	AD	RNPS1
SLC25A16	7.98156e-08	1.77965	0.068	0.016	0.00107967	AD	SLC25A16
DAAM2	8.09879e-08	0.134844	0.325	0.173	0.00109552	AD	DAAM2
AKT3	8.16539e-08	0.279246	0.518	0.305	0.00110453	AD	AKT3
FAM184A	8.21043e-08	0.421858	0.182	0.083	0.00111062	AD	FAM184A
ARHGAP32	8.27486e-08	1.61253	0.068	0.016	0.00111934	AD	ARHGAP32
SLC14A11	8.28478e-08	0.303417	0.48	0.29	0.00112068	AD	SLC14A1
GNB1	8.47149e-08	0.192046	0.475	0.265	0.00114594	AD	GNB1
RNF41	8.63224e-08	1.8633	0.058	0.011	0.00116768	AD	RNF41
TULP3	8.66277e-08	2.14473	0.051	0.008	0.00117181	AD	TULP3
PNMT	8.98983e-08	3.69329	0.035	0.002	0.00121605	AD	PNMT
RETREG2	9.04622e-08	3.26971	0.035	0.002	0.00122368	AD	RETREG2
BRD2	9.10602e-08	0.500251	0.155	0.066	0.00123177	AD	BRD2
FLRT2	9.13144e-08	3.08718	0.035	0.002	0.00123521	AD	FLRT2
CCDC30	9.14238e-08	1.06494	0.08	0.022	0.00123669	AD	CCDC30
VPS53	9.3166e-08	0.606621	0.136	0.054	0.00126026	AD	VPS53
NMRAL1	9.39671e-08	1.03403	0.099	0.033	0.00127109	AD	NMRAL1
NDUFV1	9.4782e-08	0.494379	0.138	0.055	0.00128212	AD	NDUFV1
SH2B1	9.56625e-08	1.11907	0.101	0.034	0.00129403	AD	SH2B1
CSNK1D	9.61324e-08	1.25443	0.068	0.016	0.00130038	AD	CSNK1D
PAFAH1B1	9.68693e-08	0.276847	0.37	0.207	0.00131035	AD	PAFAH1B1
BCAS4	9.69988e-08	1.1809	0.068	0.016	0.0013121	AD	BCAS4
PRKCA	9.80144e-08	0.489545	0.161	0.069	0.00132584	AD	PRKCA
SND1	1.00759e-07	0.831502	0.12	0.045	0.00136297	AD	SND1
VDAC2	1.00846e-07	1.38119	0.07	0.017	0.00136415	AD	VDAC2
NRG3	1.00853e-07	0.915111	0.091	0.028	0.00136423	AD	NRG3
AGPAT5	1.02618e-07	0.934774	0.106	0.037	0.00138812	AD	AGPAT5
INPP4B	1.05422e-07	7.55668	0.028	0	0.00142604	AD	INPP4B
CCDC85B	1.05422e-07	7.40126	0.028	0	0.00142604	AD	CCDC85B
ZNF641	1.05422e-07	7.65054	0.028	0	0.00142604	AD	ZNF641
SHANK1	1.05422e-07	7.45084	0.028	0	0.00142604	AD	SHANK1
GPR162	1.06862e-07	4.05566	0.031	0.001	0.00144552	AD	GPR162
NAB1	1.07542e-07	2.57306	0.045	0.006	0.00145473	AD	NAB1
FOXN3	1.07948e-07	2.32104	0.052	0.009	0.00146021	AD	FOXN3
RABGAP1	1.07987e-07	1.35562	0.072	0.018	0.00146074	AD	RABGAP1
TEX2	1.10875e-07	0.858993	0.092	0.029	0.00149981	AD	TEX2
KPNA4	1.12279e-07	0.943385	0.098	0.032	0.00151879	AD	KPNA4
MAP3K10	1.13538e-07	2.2811	0.045	0.006	0.00153583	AD	MAP3K10
IQCK	1.13905e-07	0.317273	0.215	0.105	0.0015408	AD	IQCK
SAFB2	1.14803e-07	0.339555	0.274	0.143	0.00155293	AD	SAFB2
IRS2	1.15779e-07	1.04957	0.059	0.012	0.00156614	AD	IRS2
TARS	1.21191e-07	1.61566	0.061	0.013	0.00163935	AD	TARS
ARHGEF10L	1.24783e-07	0.357929	0.215	0.104	0.00168794	AD	ARHGEF10L
PPP3CA	1.27079e-07	0.253579	0.291	0.151	0.001719	AD	PPP3CA
TMEM9	1.27242e-07	0.658497	0.141	0.058	0.0017212	AD	TMEM9
CAT	1.29915e-07	1.19107	0.075	0.02	0.00175736	AD	CAT
EIF5	1.30748e-07	0.431591	0.286	0.153	0.00176863	AD	EIF5
DMPK	1.37487e-07	0.486893	0.155	0.067	0.00185978	AD	DMPK
ZNF280D	1.38012e-07	1.61814	0.063	0.014	0.00186689	AD	ZNF280D
FRS2	1.38244e-07	1.40196	0.082	0.024	0.00187003	AD	FRS2
NUDT21	1.40683e-07	0.684875	0.133	0.053	0.00190302	AD	NUDT21
GUCY1A1	1.41359e-07	1.3873	0.079	0.022	0.00191217	AD	GUCY1A1
ADD1	1.417e-07	0.323895	0.248	0.126	0.00191678	AD	ADD1
CDH2	1.48382e-07	1.11313	0.075	0.02	0.00200716	AD	CDH2
VAC14	1.54536e-07	2.03492	0.047	0.007	0.00209041	AD	VAC14
OSBPL11	1.56588e-07	0.643017	0.204	0.101	0.00211817	AD	OSBPL11
CAMTA1	1.60929e-07	0.711648	0.141	0.059	0.00217689	AD	CAMTA1
COL16A1	1.61048e-07	0.833451	0.119	0.045	0.0021785	AD	COL16A1
PLXDC2	1.62265e-07	3.15042	0.037	0.003	0.00219496	AD	PLXDC2
PSMB4	1.63199e-07	1.03485	0.106	0.038	0.00220759	AD	PSMB4
ZBTB47	1.63655e-07	0.182605	0.377	0.211	0.00221376	AD	ZBTB47
GOLGA4	1.6515e-07	2.89502	0.037	0.003	0.00223399	AD	GOLGA4
NTNG2	1.66272e-07	0.551347	0.131	0.052	0.00224916	AD	NTNG2
GLYR1	1.72072e-07	0.653899	0.131	0.052	0.00232762	AD	GLYR1
CDH4	1.73948e-07	1.09102	0.087	0.027	0.00235299	AD	CDH4
HSDL2	1.75188e-07	0.945601	0.092	0.03	0.00236977	AD	HSDL2
THRAP3	1.75989e-07	2.64816	0.042	0.005	0.00238061	AD	THRAP3
VPS4A	1.77548e-07	0.445358	0.169	0.076	0.00240169	AD	VPS4A
MTUS1	1.80228e-07	1.58375	0.066	0.016	0.00243794	AD	MTUS1
ERI3	1.80548e-07	0.27507	0.318	0.174	0.00244228	AD	ERI3
GPRC5C	1.8075e-07	2.27284	0.042	0.005	0.002445	AD	GPRC5C
GPS1	1.88676e-07	0.674421	0.164	0.074	0.00255221	AD	GPS1
TBCB	1.9026e-07	0.689312	0.148	0.063	0.00257364	AD	TBCB
WDR6	1.93458e-07	0.378905	0.209	0.103	0.00261691	AD	WDR6
CCDC163	2.032e-07	0.867184	0.103	0.036	0.00274869	AD	CCDC163
DEK	2.08462e-07	1.02479	0.099	0.034	0.00281986	AD	DEK
BCAR3	2.08943e-07	2.05909	0.049	0.008	0.00282637	AD	BCAR3
ARHGEF17	2.10333e-07	0.174295	0.236	0.119	0.00284517	AD	ARHGEF17
ATP6V0D1	2.1186e-07	0.125114	0.442	0.249	0.00286583	AD	ATP6V0D1
KIF5A	2.17638e-07	0.327476	0.745	0.522	0.00294399	AD	KIF5A
PTAR1	2.19097e-07	1.25184	0.07	0.018	0.00296373	AD	PTAR1
GSTP1	2.2173e-07	3.43006	0.033	0.002	0.00299934	AD	GSTP1
IPO5	2.23111e-07	3.21153	0.033	0.002	0.00301803	AD	IPO5
ZBTB7B	2.23805e-07	2.88909	0.033	0.002	0.00302742	AD	ZBTB7B
GTF3C1	2.25401e-07	1.4198	0.07	0.018	0.003049	AD	GTF3C1
TNFSF13	2.33847e-07	1.28886	0.072	0.019	0.00316325	AD	TNFSF13
TOP1	2.39465e-07	1.8982	0.059	0.013	0.00323925	AD	TOP1
ATF6B	2.47586e-07	2.70549	0.044	0.006	0.0033491	AD	ATF6B
FAM102A	2.51724e-07	0.125349	0.216	0.105	0.00340507	AD	FAM102A
AASDHPPT	2.52375e-07	2.56345	0.044	0.006	0.00341387	AD	AASDHPPT
BSDC1	2.5302e-07	2.2617	0.044	0.006	0.0034226	AD	BSDC1
CACNG7	2.57581e-07	2.42711	0.044	0.006	0.00348429	AD	CACNG7
PATJ	2.58305e-07	4.81062	0.03	0.001	0.00349409	AD	PATJ
KXD1	2.60887e-07	2.14453	0.044	0.006	0.00352902	AD	KXD1
EXOSC6	2.62646e-07	4.35016	0.03	0.001	0.00355281	AD	EXOSC6
UBAP2L	2.63768e-07	2.84643	0.038	0.004	0.00356799	AD	UBAP2L
UBE4B	2.65221e-07	7.53208	0.026	0	0.00358764	AD	UBE4B
SOCS7	2.65221e-07	7.54713	0.026	0	0.00358764	AD	SOCS7
XYLT2	2.6617e-07	4.02127	0.03	0.001	0.00360048	AD	XYLT2
KY	2.67058e-07	2.84726	0.03	0.001	0.00361249	AD	KY
GPT2	2.67657e-07	0.333388	0.288	0.157	0.0036206	AD	GPT2
PSD4	2.71055e-07	1.55884	0.044	0.006	0.00366655	AD	PSD4
ACIN1	2.75683e-07	1.35477	0.082	0.025	0.00372917	AD	ACIN1
CELF2	2.76286e-07	0.694764	0.096	0.032	0.00373732	AD	CELF2
TRPM3	2.8151e-07	1.31734	0.092	0.031	0.00380799	AD	TRPM3
ARHGEF1	2.82725e-07	1.86549	0.038	0.004	0.00382442	AD	ARHGEF1
RING1	2.87205e-07	0.430978	0.117	0.044	0.00388502	AD	RING1
SEC61G	2.88705e-07	1.59363	0.051	0.009	0.00390532	AD	SEC61G
NSMF1	2.9126e-07	0.16005	0.995	0.994	0.00393987	AD	NSMF
NFE2L2	2.92372e-07	0.904546	0.106	0.039	0.00395492	AD	NFE2L2
APC2	2.94594e-07	0.234969	0.663	0.429	0.00398497	AD	APC2
CDK9	2.94987e-07	1.72288	0.063	0.015	0.00399029	AD	CDK9
DCTN2	3.04581e-07	1.21524	0.082	0.025	0.00412007	AD	DCTN2
RILPL1	3.09371e-07	1.10805	0.077	0.022	0.00418486	AD	RILPL1
DCAF8	3.13573e-07	1.56999	0.061	0.014	0.0042417	AD	DCAF8
ARPC3	3.1481e-07	0.82467	0.117	0.045	0.00425843	AD	ARPC3
LAMTOR4	3.16044e-07	0.794847	0.133	0.055	0.00427513	AD	LAMTOR4
HDHD3	3.16126e-07	1.1389	0.061	0.014	0.00427624	AD	HDHD3
MANBAL	3.24546e-07	1.53505	0.063	0.015	0.00439013	AD	MANBAL
TBL1XR1	3.27858e-07	2.52937	0.045	0.007	0.00443493	AD	TBL1XR1
HAGHL	3.34607e-07	0.944227	0.084	0.026	0.00452623	AD	HAGHL
DCTN1	3.39242e-07	0.392838	0.162	0.072	0.00458893	AD	DCTN1
ANO8	3.40461e-07	0.586679	0.138	0.058	0.00460542	AD	ANO8
SLC25A22	3.46201e-07	0.390835	0.398	0.237	0.00468306	AD	SLC25A22
SLC35C2	3.48003e-07	1.45741	0.052	0.01	0.00470743	AD	SLC35C2
TSC22D4	3.55054e-07	1.37586	0.052	0.01	0.00480281	AD	TSC22D4
RHOBTB2	3.55846e-07	1.51152	0.052	0.01	0.00481352	AD	RHOBTB2
CCT2	3.57301e-07	1.65065	0.065	0.016	0.00483321	AD	CCT2
LRP3	3.58232e-07	1.31559	0.052	0.01	0.0048458	AD	LRP3
PDLIM3	3.59003e-07	0.529051	0.136	0.057	0.00485623	AD	PDLIM3
CYP46A1	3.60613e-07	0.642726	0.117	0.045	0.00487801	AD	CYP46A1
RGL2	3.62193e-07	1.50448	0.065	0.016	0.00489939	AD	RGL2
TEX9	3.67645e-07	0.9472	0.089	0.029	0.00497313	AD	TEX9
ASRGL1	3.69015e-07	0.815584	0.092	0.031	0.00499166	AD	ASRGL1
MXI1	3.78372e-07	0.288761	0.407	0.242	0.00511823	AD	MXI1
CSGALNACT2	3.78852e-07	0.978288	0.084	0.026	0.00512473	AD	CSGALNACT2
UBLCP1	3.86747e-07	3.27455	0.035	0.003	0.00523153	AD	UBLCP1
LARP4	3.87544e-07	1.84969	0.054	0.011	0.00524231	AD	LARP4
AP2S1	3.88066e-07	0.756918	0.162	0.075	0.00524937	AD	AP2S1
OAZ2	3.91584e-07	0.3569	0.188	0.089	0.00529696	AD	OAZ2
AXL	3.94457e-07	1.18832	0.065	0.016	0.00533581	AD	AXL
CDKL3	3.95864e-07	3.09661	0.035	0.003	0.00535485	AD	CDKL3
KBTBD11	3.96811e-07	0.658091	0.105	0.038	0.00536767	AD	KBTBD11
UBXN10	3.97018e-07	2.8323	0.035	0.003	0.00537046	AD	UBXN10
ANAPC2	3.99335e-07	2.94282	0.035	0.003	0.00540181	AD	ANAPC2
SPACA9	4.02837e-07	2.54626	0.035	0.003	0.00544917	AD	SPACA9
FAM193A	4.05401e-07	2.70936	0.04	0.005	0.00548386	AD	FAM193A
FAM43B	4.09928e-07	2.1426	0.035	0.003	0.0055451	AD	FAM43B
WDR45B	4.09928e-07	2.60578	0.035	0.003	0.0055451	AD	WDR45B
AP2A1	4.10816e-07	1.41066	0.065	0.016	0.00555711	AD	AP2A1
FBXL7	4.26285e-07	1.43433	0.054	0.011	0.00576635	AD	FBXL7
CYP2J2	4.27364e-07	1.76508	0.04	0.005	0.00578095	AD	CYP2J2
HGS	4.28206e-07	0.560843	0.108	0.04	0.00579234	AD	HGS
CRAT	4.28492e-07	1.89778	0.04	0.005	0.00579621	AD	CRAT
BEGAIN	4.28492e-07	2.03494	0.04	0.005	0.00579621	AD	BEGAIN
IVD	4.47364e-07	1.16784	0.066	0.017	0.00605149	AD	IVD
GOLGA3	4.55189e-07	2.03262	0.047	0.008	0.00615734	AD	GOLGA3
CMTM4	4.58222e-07	0.507909	0.164	0.075	0.00619837	AD	CMTM4
CTF1	4.58419e-07	1.91802	0.047	0.008	0.00620103	AD	CTF1
SENP6	4.59345e-07	1.29274	0.068	0.018	0.00621356	AD	SENP6
USP33	4.63851e-07	2.09065	0.047	0.008	0.00627452	AD	USP33
GTF2H5	4.83425e-07	1.04218	0.068	0.018	0.00653929	AD	GTF2H5
BCL7C	4.90956e-07	1.51383	0.056	0.012	0.00664116	AD	BCL7C
CYFIP2	5.09895e-07	0.1329	0.38	0.214	0.00689735	AD	CYFIP2
SCARA3	5.16003e-07	0.159774	0.291	0.161	0.00697997	AD	SCARA3
SNRNP200	5.46216e-07	3.01182	0.031	0.002	0.00738867	AD	SNRNP200
PRKACA	5.46532e-07	0.280298	0.208	0.102	0.00739294	AD	PRKACA
EMC4	5.4791e-07	1.30995	0.084	0.027	0.00741158	AD	EMC4
ABCA1	5.49323e-07	1.37637	0.058	0.013	0.00743069	AD	ABCA1
ZNF629	5.49595e-07	3.48533	0.031	0.002	0.00743437	AD	ZNF629
STK17B	5.53399e-07	0.391814	0.068	0.018	0.00748583	AD	STK17B
SPIRE1	5.53979e-07	0.558917	0.161	0.074	0.00749368	AD	SPIRE1
CMPK1	5.58499e-07	1.2379	0.082	0.026	0.00755481	AD	CMPK1
HTT	5.90699e-07	2.26468	0.042	0.006	0.00799038	AD	HTT
LTBP1	5.92966e-07	1.02594	0.08	0.025	0.00802105	AD	LTBP1
PFDN5	5.93886e-07	0.665524	0.164	0.077	0.0080335	AD	PFDN5
NIN	5.98183e-07	2.5403	0.042	0.006	0.00809162	AD	NIN
VGLL4	6.04236e-07	1.93472	0.042	0.006	0.0081735	AD	VGLL4
PPP1R12A	6.10205e-07	1.56715	0.049	0.009	0.00825424	AD	PPP1R12A
C7orf50	6.10348e-07	2.13604	0.042	0.006	0.00825617	AD	C7orf50
PDXP	6.11885e-07	2.03312	0.042	0.006	0.00827697	AD	PDXP
DCTN3	6.24091e-07	0.931297	0.092	0.032	0.00844207	AD	DCTN3
ATP2C1	6.32504e-07	2.66707	0.037	0.004	0.00855588	AD	ATP2C1
SIX5	6.45669e-07	2.64737	0.037	0.004	0.00873397	AD	SIX5
KDSR	6.49934e-07	4.81402	0.028	0.001	0.00879166	AD	KDSR
RALBP1	6.52096e-07	4.80264	0.028	0.001	0.0088209	AD	RALBP1
SIPA1L1	6.54592e-07	2.50989	0.037	0.004	0.00885467	AD	SIPA1L1
ROGDI	6.58217e-07	2.10779	0.051	0.01	0.0089037	AD	ROGDI
PITPNM2	6.58622e-07	4.52551	0.028	0.001	0.00890918	AD	PITPNM2
NSD1	6.60003e-07	2.66176	0.037	0.004	0.00892786	AD	NSD1
YJEFN3	6.60173e-07	0.355219	0.274	0.151	0.00893016	AD	YJEFN3
DBNDD1	6.61816e-07	2.47825	0.037	0.004	0.00895239	AD	DBNDD1
CHST10	6.63008e-07	4.19546	0.028	0.001	0.0089685	AD	CHST10
DBNL	6.63008e-07	4.10181	0.028	0.001	0.0089685	AD	DBNL
TNS3	6.63008e-07	4.15647	0.028	0.001	0.0089685	AD	TNS3
NIPSNAP1	6.63008e-07	4.17691	0.028	0.001	0.0089685	AD	NIPSNAP1
C16orf74	6.67284e-07	2.02843	0.037	0.004	0.00902636	AD	C16orf74
SKI	6.67421e-07	3.60757	0.028	0.001	0.00902821	AD	SKI
CASTOR2	6.67421e-07	3.74669	0.028	0.001	0.00902821	AD	CASTOR2
FBXL19	6.67421e-07	3.60667	0.028	0.001	0.00902821	AD	FBXL19
SZRD1	6.67797e-07	7.24323	0.024	0	0.00903329	AD	SZRD1
MCF2L2	6.67797e-07	7.34689	0.024	0	0.00903329	AD	MCF2L2
GAB1	6.67797e-07	7.16771	0.024	0	0.00903329	AD	GAB1
ZNF703	6.67797e-07	7.38069	0.024	0	0.00903329	AD	ZNF703
ATXN7L3	6.67797e-07	7.48998	0.024	0	0.00903329	AD	ATXN7L3
MEGF9	6.7923e-07	0.592098	0.143	0.063	0.00918795	AD	MEGF9
SORT1	6.84647e-07	0.244991	0.22	0.111	0.00926121	AD	SORT1
GPR137B	6.84925e-07	0.635086	0.105	0.039	0.00926498	AD	GPR137B
NDUFS3	6.8941e-07	2.02681	0.051	0.01	0.00932565	AD	NDUFS3
RALGDS	7.1223e-07	0.889937	0.089	0.03	0.00963433	AD	RALGDS
ZRANB2	7.16929e-07	0.950911	0.087	0.029	0.0096979	AD	ZRANB2
SOD2	7.22048e-07	0.213148	0.501	0.302	0.00976715	AD	SOD2
CCNI	7.22329e-07	0.207574	0.471	0.279	0.00977095	AD	CCNI
HSF4	7.3052e-07	0.822819	0.087	0.029	0.00988175	AD	HSF4
RAB18	7.49279e-07	0.504516	0.199	0.1	0.0101355	AD	RAB18
KMT5B	7.55502e-07	1.4355	0.063	0.016	0.0102197	AD	KMT5B
APLP1	7.56641e-07	2.01106	0.052	0.011	0.0102351	AD	APLP1
NFIA	7.58078e-07	0.374052	0.286	0.163	0.0102545	AD	NFIA
OPLAH	7.6172e-07	1.70455	0.066	0.018	0.0103038	AD	OPLAH
CCDC85C	8.09061e-07	1.8336	0.044	0.007	0.0109442	AD	CCDC85C
POLDIP3	8.10732e-07	1.23167	0.063	0.016	0.0109668	AD	POLDIP3
NBR1	8.18488e-07	1.14528	0.063	0.016	0.0110717	AD	NBR1
NRBP2	8.3343e-07	0.409033	0.182	0.089	0.0112738	AD	NRBP2
KIF21B	8.46974e-07	1.87264	0.044	0.007	0.011457	AD	KIF21B
TCEA3	8.5035e-07	0.611181	0.129	0.055	0.0115027	AD	TCEA3
TRIP6	8.97591e-07	1.07384	0.065	0.017	0.0121417	AD	TRIP6
EID1	9.18668e-07	0.292683	0.449	0.269	0.0124268	AD	EID1
ATPAF1	9.21886e-07	0.40506	0.148	0.066	0.0124703	AD	ATPAF1
ACADM	9.27826e-07	1.31014	0.066	0.018	0.0125507	AD	ACADM
TCF7L2	9.35115e-07	0.938091	0.065	0.017	0.0126493	AD	TCF7L2
ZNF512B	9.43991e-07	3.23952	0.033	0.003	0.0127694	AD	ZNF512B
MPST	9.44647e-07	1.02745	0.052	0.011	0.0127782	AD	MPST
RBM26	9.4867e-07	1.30993	0.052	0.011	0.0128327	AD	RBM26
LRP1	9.55396e-07	0.456652	0.262	0.147	0.0129236	AD	LRP1
TLE1	9.69372e-07	1.51969	0.054	0.012	0.0131127	AD	TLE1
MROH1	9.84682e-07	1.1664	0.068	0.019	0.0133198	AD	MROH1
MCUR1	9.87634e-07	1.60923	0.054	0.012	0.0133597	AD	MCUR1
MYOM1	1.00591e-06	1.14924	0.087	0.03	0.013607	AD	MYOM1
TUT4	1.01106e-06	1.96419	0.038	0.005	0.0136766	AD	TUT4
WIPF2	1.02376e-06	0.626636	0.129	0.055	0.0138484	AD	WIPF2
GNAI2	1.02695e-06	2.05566	0.038	0.005	0.0138916	AD	GNAI2
EHBP1	1.04335e-06	1.32903	0.054	0.012	0.0141134	AD	EHBP1
SLC24A3	1.05638e-06	1.55129	0.054	0.012	0.0142896	AD	SLC24A3
PHLPP1	1.09076e-06	1.12085	0.054	0.012	0.0147547	AD	PHLPP1
LPIN2	1.13026e-06	1.01981	0.087	0.03	0.015289	AD	LPIN2
CRB1	1.16683e-06	0.564566	0.099	0.037	0.0157837	AD	CRB1
AARS	1.19641e-06	0.909994	0.091	0.032	0.0161839	AD	AARS
SMIM29	1.22961e-06	0.497906	0.131	0.056	0.0166329	AD	SMIM29
ST5	1.23484e-06	0.706907	0.098	0.036	0.0167037	AD	ST5
DIO2	1.28026e-06	0.854045	0.056	0.013	0.017318	AD	DIO2
KIF3A	1.30485e-06	0.469453	0.225	0.121	0.0176507	AD	KIF3A
D2HGDH	1.31132e-06	3.63872	0.03	0.002	0.0177382	AD	D2HGDH
TRAK2	1.32342e-06	3.53305	0.03	0.002	0.0179019	AD	TRAK2
FZR1	1.32342e-06	3.69494	0.03	0.002	0.0179019	AD	FZR1
P4HTM	1.33189e-06	0.719199	0.119	0.049	0.0180164	AD	P4HTM
ADGRL3	1.33691e-06	0.82034	0.08	0.026	0.0180844	AD	ADGRL3
IST1	1.36036e-06	2.67245	0.03	0.002	0.0184016	AD	IST1
AUTS2	1.36452e-06	2.87424	0.03	0.002	0.0184579	AD	AUTS2
ZNF462	1.36452e-06	2.8303	0.03	0.002	0.0184579	AD	ZNF462
JDP2	1.38865e-06	0.812293	0.084	0.028	0.0187842	AD	JDP2
GHITM	1.47002e-06	0.471112	0.15	0.069	0.019885	AD	GHITM
UBR5	1.48009e-06	1.97576	0.049	0.01	0.0200212	AD	UBR5
PPP4R4	1.51473e-06	1.72791	0.063	0.017	0.0204898	AD	PPP4R4
TFPT	1.5191e-06	2.68952	0.035	0.004	0.0205489	AD	TFPT
PEX11A	1.52051e-06	0.554297	0.108	0.043	0.0205679	AD	PEX11A
UNKL	1.52737e-06	2.74961	0.035	0.004	0.0206607	AD	UNKL
STX6	1.53985e-06	2.70767	0.035	0.004	0.0208295	AD	STX6
PPP2R5B	1.54822e-06	2.5387	0.035	0.004	0.0209428	AD	PPP2R5B
TCEA2	1.58215e-06	1.84363	0.035	0.004	0.0214018	AD	TCEA2
SPATA20	1.5966e-06	1.66468	0.049	0.01	0.0215972	AD	SPATA20
CLIP4	1.60753e-06	0.66287	0.126	0.054	0.0217451	AD	CLIP4
NCBP2	1.6355e-06	4.58462	0.026	0.001	0.0221234	AD	NCBP2
SUN1	1.64091e-06	4.60287	0.026	0.001	0.0221966	AD	SUN1
PCED1A	1.64091e-06	4.78357	0.026	0.001	0.0221966	AD	PCED1A
MARCH3	1.64208e-06	1.35146	0.049	0.01	0.0222124	AD	MARCH3
SFMBT2	1.64671e-06	1.10883	0.061	0.016	0.022275	AD	SFMBT2
TUBGCP2	1.64919e-06	1.47536	0.049	0.01	0.0223086	AD	TUBGCP2
SLC44A1	1.65179e-06	4.01063	0.026	0.001	0.0223438	AD	SLC44A1
SIPA1L3	1.65726e-06	3.97603	0.026	0.001	0.0224177	AD	SIPA1L3
NARF	1.66274e-06	3.85059	0.026	0.001	0.0224919	AD	NARF
UNC80	1.66824e-06	2.95809	0.026	0.001	0.0225663	AD	UNC80
THAP4	1.66824e-06	3.63465	0.026	0.001	0.0225663	AD	THAP4
PARVA	1.67429e-06	1.32588	0.049	0.01	0.0226482	AD	PARVA
IP6K1	1.68329e-06	7.08815	0.023	0	0.0227699	AD	IP6K1
TBC1D10A	1.68329e-06	7.45196	0.023	0	0.0227699	AD	TBC1D10A
GABARAP1	1.71772e-06	0.242744	0.433	0.254	0.0232356	AD	GABARAP
TUFM	1.72496e-06	1.34747	0.065	0.018	0.0233336	AD	TUFM
NDUFA10	1.80918e-06	1.33474	0.072	0.022	0.0244728	AD	NDUFA10
STAT3	1.84334e-06	2.04246	0.042	0.007	0.0249349	AD	STAT3
FLII	1.84628e-06	1.54193	0.051	0.011	0.0249746	AD	FLII
NAV2	1.84953e-06	1.16553	0.068	0.02	0.0250186	AD	NAV2
PLSCR4	1.87115e-06	1.12244	0.066	0.019	0.0253111	AD	PLSCR4
DDRGK1	1.87296e-06	0.277673	0.349	0.204	0.0253355	AD	DDRGK1
FXR1	1.88607e-06	1.17864	0.066	0.019	0.0255129	AD	FXR1
CCDC88B	1.9011e-06	1.48225	0.042	0.007	0.0257162	AD	CCDC88B
SGTA	1.9262e-06	0.850748	0.063	0.017	0.0260557	AD	SGTA
HDGF	1.96168e-06	0.906399	0.063	0.017	0.0265357	AD	HDGF
NDUFB7	1.9623e-06	1.0052	0.091	0.033	0.026544	AD	NDUFB7
NKAIN4	2.00137e-06	0.433377	0.108	0.043	0.0270725	AD	NKAIN4
ANKDD1A	2.01252e-06	0.385719	0.133	0.059	0.0272234	AD	ANKDD1A
SLC25A23	2.03158e-06	0.146491	0.478	0.281	0.0274811	AD	SLC25A23
DENND2A	2.03744e-06	1.09191	0.082	0.028	0.0275605	AD	DENND2A
RMND5A	2.03976e-06	1.09572	0.084	0.029	0.0275919	AD	RMND5A
CACNB1	2.04875e-06	0.3933	0.192	0.098	0.0277134	AD	CACNB1
CARMIL1	2.04944e-06	0.510321	0.171	0.085	0.0277228	AD	CARMIL1
SPTBN4	2.07198e-06	1.10197	0.077	0.025	0.0280277	AD	SPTBN4
TOMM34	2.08259e-06	1.07639	0.073	0.023	0.0281712	AD	TOMM34
GRHPR	2.09205e-06	0.916652	0.072	0.022	0.0282992	AD	GRHPR
CBSL	2.12773e-06	0.817662	0.073	0.023	0.0287818	AD	CBSL
GMNN	2.1495e-06	0.830139	0.07	0.021	0.0290763	AD	GMNN
MAP6D1	2.17489e-06	2.17118	0.044	0.008	0.0294198	AD	MAP6D1
PGM1	2.1999e-06	0.473657	0.101	0.039	0.0297581	AD	PGM1
PLRG1	2.21462e-06	2.55066	0.037	0.005	0.0299572	AD	PLRG1
MED10	2.21753e-06	1.02381	0.075	0.024	0.0299965	AD	MED10
PREPL	2.23299e-06	0.34918	0.288	0.164	0.0302056	AD	PREPL
C11orf49	2.24552e-06	0.594632	0.168	0.083	0.0303751	AD	C11orf49
CMIP	2.27225e-06	2.11203	0.037	0.005	0.0307367	AD	CMIP
H2AFY	2.29091e-06	2.94485	0.031	0.003	0.0309892	AD	H2AFY
DPP7	2.31742e-06	0.566763	0.099	0.038	0.0313477	AD	DPP7
WDR47	2.31861e-06	1.88411	0.044	0.008	0.0313638	AD	WDR47
LRRC6	2.33132e-06	2.38351	0.037	0.005	0.0315357	AD	LRRC6
APPL2	2.33708e-06	3.0075	0.031	0.003	0.0316137	AD	APPL2
SLC25A39	2.36386e-06	2.42213	0.031	0.003	0.031976	AD	SLC25A39
GAN	2.36872e-06	0.259787	0.176	0.087	0.0320417	AD	GAN
SOX6	2.37736e-06	2.24659	0.031	0.003	0.0321586	AD	SOX6
SPATA2	2.37736e-06	2.32267	0.031	0.003	0.0321586	AD	SPATA2
B4GALT2	2.38414e-06	2.48893	0.031	0.003	0.0322503	AD	B4GALT2
MSRA	2.39214e-06	0.765902	0.11	0.045	0.0323585	AD	MSRA
ZFAND3	2.4268e-06	1.6329	0.044	0.008	0.0328273	AD	ZFAND3
FREM2	2.42779e-06	1.34796	0.054	0.013	0.0328407	AD	FREM2
MICALL2	2.44061e-06	0.516501	0.091	0.033	0.0330141	AD	MICALL2
C4orf3	2.46951e-06	0.972966	0.084	0.029	0.0334051	AD	C4orf3
SORL1	2.52792e-06	0.350125	0.173	0.085	0.0341952	AD	SORL1
C3orf70	2.53504e-06	0.66657	0.11	0.045	0.0342915	AD	C3orf70
SAP30BP	2.5433e-06	1.12092	0.054	0.013	0.0344033	AD	SAP30BP
ARHGEF12	2.57844e-06	1.34183	0.056	0.014	0.0348785	AD	ARHGEF12
TTC7B	2.58733e-06	0.734399	0.091	0.033	0.0349988	AD	TTC7B
CAMK2G	2.63755e-06	0.134107	0.56	0.345	0.0356781	AD	CAMK2G
PLCD1	2.6479e-06	0.53709	0.138	0.063	0.0358182	AD	PLCD1
TMEM59	2.64928e-06	2.02316	0.045	0.009	0.0358368	AD	TMEM59
RBM6	2.69555e-06	1.25194	0.056	0.014	0.0364627	AD	RBM6
TNRC6B	2.73747e-06	1.39723	0.056	0.014	0.0370297	AD	TNRC6B
INTU	2.74864e-06	0.457822	0.08	0.027	0.0371809	AD	INTU
RAB34	2.77356e-06	1.68153	0.059	0.016	0.0375179	AD	RAB34
GPR107	2.80196e-06	1.47241	0.058	0.015	0.0379021	AD	GPR107
PRCC	2.94789e-06	2.59033	0.038	0.006	0.0398761	AD	PRCC
EXOSC10	3.04126e-06	1.14397	0.058	0.015	0.0411392	AD	EXOSC10
GATD1	3.12985e-06	0.407045	0.138	0.063	0.0423375	AD	GATD1
RND2	3.22707e-06	2.02349	0.038	0.006	0.0436526	AD	RND2
C12orf57	3.23215e-06	3.50606	0.028	0.002	0.0437212	AD	C12orf57
BAG6	3.25647e-06	1.17338	0.059	0.016	0.0440502	AD	BAG6
TAOK3	3.27836e-06	1.80574	0.047	0.01	0.0443464	AD	TAOK3
FOXRED1	3.28155e-06	3.29721	0.028	0.002	0.0443895	AD	FOXRED1
SAT2	3.30188e-06	1.40526	0.072	0.023	0.0446645	AD	SAT2
NPAS2	3.34178e-06	2.60245	0.028	0.002	0.0452043	AD	NPAS2
DCTN4	3.56569e-06	1.28673	0.066	0.02	0.0482331	AD	DCTN4
CCAR2	3.60543e-06	1.2801	0.066	0.02	0.0487707	AD	CCAR2

## Sheet: Ast_CA4
Unnamed: 0	p_val	avg_log2FC	pct.1	pct.2	p_val_adj	cluster	gene
HSPA1B	1.84608e-155	2.94935	0.551	0.17	2.49719e-151	Control	HSPA1B
UBC	3.47319e-146	0.454523	1	1	4.69819e-142	Control	UBC
PSAP	3.05323e-140	0.547712	1	1	4.13011e-136	Control	PSAP
HSP90AA1	1.46784e-139	0.639477	0.997	0.987	1.98555e-135	Control	HSP90AA1
HSPA8	3.57161e-137	0.935814	0.883	0.802	4.83132e-133	Control	HSPA8
GPM6A	2.68358e-100	0.725995	0.992	0.986	3.63008e-96	Control	GPM6A
DKK3	3.85243e-94	0.529502	0.997	1	5.21118e-90	Control	DKK3
PEBP1	3.57333e-86	0.477981	0.969	0.975	4.83364e-82	Control	PEBP1
AQP4	6.91831e-86	0.543101	0.998	0.999	9.3584e-82	Control	AQP4
CKB	3.22395e-82	0.430569	1	1	4.36103e-78	Control	CKB
LMO3	6.68129e-78	0.682094	0.926	0.895	9.03778e-74	Control	LMO3
MAP1B	3.83576e-77	0.408898	0.993	0.998	5.18863e-73	Control	MAP1B
HSPA1A	2.84301e-73	2.59621	0.42	0.191	3.84574e-69	Control	HSPA1A
DPYSL2	1.54414e-70	0.45665	0.977	0.978	2.08876e-66	Control	DPYSL2
NCDN	1.11675e-69	0.425049	0.984	0.993	1.51063e-65	Control	NCDN
OLFM1	1.47594e-67	0.451634	0.947	0.975	1.9965e-63	Control	OLFM1
CHN1	4.42619e-64	0.567378	0.862	0.88	5.9873e-60	Control	CHN1
ATP1B2	9.15607e-56	0.550134	0.945	0.954	1.23854e-51	Control	ATP1B2
SLC1A2	1.21221e-53	0.548228	0.988	0.999	1.63975e-49	Control	SLC1A2
NRXN1	3.10703e-52	0.626371	0.812	0.788	4.20288e-48	Control	NRXN1
PEA15	3.35775e-50	0.300574	0.997	1	4.54202e-46	Control	PEA15
ITM2C	5.42627e-50	0.52278	0.873	0.87	7.34012e-46	Control	ITM2C
SLC22A17	4.30237e-49	0.720758	0.742	0.721	5.81982e-45	Control	SLC22A17
B4GAT1	1.70175e-47	0.616745	0.782	0.781	2.30196e-43	Control	B4GAT1
PRNP	2.0234e-47	0.385825	0.932	0.963	2.73705e-43	Control	PRNP
RTN4	6.09121e-46	0.478353	0.825	0.881	8.23958e-42	Control	RTN4
ABR	2.31534e-44	0.565656	0.826	0.831	3.13196e-40	Control	ABR
RUFY3	6.4225e-44	0.613661	0.791	0.777	8.68771e-40	Control	RUFY3
ARHGEF4	8.70681e-42	0.458242	0.968	0.953	1.17777e-37	Control	ARHGEF4
ENO1	2.80047e-41	0.357365	0.964	0.972	3.7882e-37	Control	ENO1
MAPK10	3.03463e-40	0.408905	0.919	0.936	4.10494e-36	Control	MAPK10
PPP2CB	5.53117e-39	0.297572	0.994	0.998	7.48202e-35	Control	PPP2CB
AQP1	3.31146e-38	0.519026	0.907	0.878	4.47941e-34	Control	AQP1
MAP2K1	3.83333e-38	0.819206	0.641	0.534	5.18534e-34	Control	MAP2K1
LGI1	1.75657e-37	0.480709	0.872	0.867	2.37612e-33	Control	LGI1
ITM2B	3.27096e-37	0.294491	0.988	0.995	4.42463e-33	Control	ITM2B
CPE	5.88178e-37	0.278802	1	1	7.95628e-33	Control	CPE
ACTB	2.95457e-36	0.233175	0.994	1	3.99665e-32	Control	ACTB
SOD1	5.47096e-36	0.34739	0.936	0.958	7.40056e-32	Control	SOD1
TUBB2A	7.39157e-34	0.891808	0.607	0.534	9.99858e-30	Control	TUBB2A
CNTN1	4.62798e-33	0.492766	0.799	0.809	6.26027e-29	Control	CNTN1
CIRBP	1.69593e-32	0.458102	0.807	0.89	2.29409e-28	Control	CIRBP
ATP1A2	2.7644e-31	0.293163	0.988	0.995	3.7394e-27	Control	ATP1A2
ATP6V1G2	3.88021e-31	0.581268	0.725	0.731	5.24876e-27	Control	ATP6V1G2
FKBP8	1.81807e-30	0.312703	0.877	0.928	2.45931e-26	Control	FKBP8
NCAN	7.88839e-30	0.785811	0.642	0.573	1.06706e-25	Control	NCAN
KIF1B	6.88903e-29	0.314066	0.919	0.946	9.31879e-25	Control	KIF1B
HSPB8	8.77129e-29	0.579973	0.792	0.805	1.18649e-24	Control	HSPB8
UBB	1.60771e-28	0.841939	0.573	0.555	2.17475e-24	Control	UBB
SPTAN1	5.03227e-28	0.590675	0.69	0.685	6.80715e-24	Control	SPTAN1
CST3	4.02585e-26	0.254349	0.99	0.996	5.44576e-22	Control	CST3
COX7C	6.22623e-26	0.298374	0.885	0.956	8.42222e-22	Control	COX7C
NSMF	8.402e-26	0.300595	0.993	0.989	1.13654e-21	Control	NSMF
THRA	4.50958e-25	0.481824	0.753	0.786	6.10011e-21	Control	THRA
ENO2	1.58319e-24	0.58288	0.668	0.684	2.14158e-20	Control	ENO2
WBP2	3.58463e-23	0.428585	0.775	0.838	4.84894e-19	Control	WBP2
TMEM59L	1.00849e-22	0.348054	0.773	0.866	1.36419e-18	Control	TMEM59L
APOE	1.05009e-22	0.300357	0.984	0.983	1.42045e-18	Control	APOE
S100A1	6.73372e-22	0.351267	0.902	0.931	9.1087e-18	Control	S100A1
NAPA	1.19368e-21	0.489367	0.709	0.747	1.61469e-17	Control	NAPA
NAPB	2.62235e-21	0.871272	0.52	0.464	3.54725e-17	Control	NAPB
NCKAP1	6.1364e-20	0.420921	0.725	0.778	8.30071e-16	Control	NCKAP1
ANK2	1.11376e-19	0.291752	0.865	0.925	1.50659e-15	Control	ANK2
CALM3	2.54353e-19	0.204446	0.859	0.945	3.44064e-15	Control	CALM3
PRDX6	3.44745e-19	0.314857	0.804	0.866	4.66337e-15	Control	PRDX6
SQSTM1	5.12115e-19	0.311942	0.791	0.877	6.92739e-15	Control	SQSTM1
CHI3L2	2.51313e-18	1.99482	0.17	0.078	3.39951e-14	Control	CHI3L2
HSP90AB1	7.70868e-18	0.887813	0.477	0.447	1.04275e-13	Control	HSP90AB1
GPRC5B	1.16999e-17	0.303348	0.885	0.907	1.58265e-13	Control	GPRC5B
CLU	2.40485e-17	0.130821	1	1	3.25304e-13	Control	CLU
ID2	4.5563e-17	0.814609	0.553	0.554	6.16331e-13	Control	ID2
PFKFB2	9.68121e-17	0.812533	0.488	0.428	1.30958e-12	Control	PFKFB2
MT3	1.1539e-16	0.182986	0.998	0.999	1.56088e-12	Control	MT3
KLHL24	1.64686e-16	0.683997	0.571	0.564	2.22771e-12	Control	KLHL24
CXCL14	1.76271e-16	1.23979	0.339	0.247	2.38441e-12	Control	CXCL14
NCS1	2.14979e-16	0.262355	0.936	0.937	2.90803e-12	Control	NCS1
EZR	1.29316e-15	0.955307	0.417	0.342	1.74926e-11	Control	EZR
APLNR	2.24029e-15	0.637079	0.635	0.643	3.03043e-11	Control	APLNR
KLC1	2.24367e-15	0.318442	0.774	0.856	3.03501e-11	Control	KLC1
FEZ1	5.16877e-15	0.418426	0.685	0.758	6.99179e-11	Control	FEZ1
PTGES3	1.27743e-14	0.354324	0.724	0.815	1.72798e-10	Control	PTGES3
KIF1A	2.27173e-14	0.273417	0.801	0.842	3.07296e-10	Control	KIF1A
PLEC	3.11948e-14	0.283909	0.812	0.857	4.21972e-10	Control	PLEC
SNCG	3.62104e-14	0.516621	0.615	0.63	4.89818e-10	Control	SNCG
ATP5F1B	6.449e-14	0.500693	0.618	0.674	8.72357e-10	Control	ATP5F1B
FTH1	6.54006e-14	0.176296	0.995	0.993	8.84674e-10	Control	FTH1
PFKP	7.14324e-14	0.256269	0.868	0.904	9.66266e-10	Control	PFKP
HABP4	5.9452e-13	0.344978	0.7	0.801	8.04207e-09	Control	HABP4
GNAQ	1.64598e-12	0.410468	0.652	0.72	2.22652e-08	Control	GNAQ
PPP2R2B	2.48343e-12	0.511159	0.638	0.695	3.35933e-08	Control	PPP2R2B
PSD3	3.17594e-12	0.524703	0.603	0.626	4.29609e-08	Control	PSD3
GRINA	3.28305e-12	0.510721	0.583	0.611	4.44099e-08	Control	GRINA
AEBP1	5.5001e-12	0.473357	0.641	0.667	7.43998e-08	Control	AEBP1
CRYAB	1.83344e-11	0.144375	0.991	0.999	2.48009e-07	Control	CRYAB
AP2M1	2.1559e-11	0.49861	0.578	0.64	2.91629e-07	Control	AP2M1
OGFRL1	1.00205e-10	0.337436	0.754	0.848	1.35548e-06	Control	OGFRL1
HNRNPC	1.04248e-10	0.240207	0.769	0.884	1.41017e-06	Control	HNRNPC
ATXN10	1.07275e-10	0.461611	0.614	0.681	1.4511e-06	Control	ATXN10
ACO2	1.18996e-10	0.52016	0.592	0.63	1.60965e-06	Control	ACO2
PRRC2B	1.2979e-10	0.298354	0.7	0.784	1.75567e-06	Control	PRRC2B
GABARAPL1	2.20033e-10	1.38719	0.218	0.152	2.97638e-06	Control	GABARAPL1
AGT	2.5789e-10	0.208568	0.932	0.968	3.48848e-06	Control	AGT
CADM3	2.62283e-10	0.284644	0.712	0.798	3.5479e-06	Control	CADM3
ID4	2.93175e-10	0.333979	0.791	0.845	3.96578e-06	Control	ID4
CAMK2G	4.25208e-10	0.562831	0.578	0.603	5.75178e-06	Control	CAMK2G
EDNRB	4.71695e-10	0.849991	0.418	0.379	6.38062e-06	Control	EDNRB
RGMA	4.8438e-10	0.796005	0.454	0.434	6.5522e-06	Control	RGMA
OCIAD1	8.71323e-10	0.229924	0.761	0.865	1.17864e-05	Control	OCIAD1
GFAP	1.20265e-09	0.21431	1	1	1.62682e-05	Control	GFAP
ATP1B1	1.25776e-09	0.775186	0.408	0.386	1.70137e-05	Control	ATP1B1
GABBR1	1.74119e-09	0.237049	0.842	0.882	2.35531e-05	Control	GABBR1
ASPH	1.84606e-09	0.339508	0.731	0.816	2.49716e-05	Control	ASPH
PARD3	2.0787e-09	0.100804	0.269	0.444	2.81186e-05	Control	PARD3
FXYD1	2.72411e-09	0.282677	0.796	0.843	3.68491e-05	Control	FXYD1
PPP1R1A	4.26465e-09	0.699317	0.48	0.485	5.76879e-05	Control	PPP1R1A
NDFIP1	5.0461e-09	0.297814	0.678	0.781	6.82586e-05	Control	NDFIP1
PRKCA	5.47021e-09	0.118472	0.118	0.22	7.39955e-05	Control	PRKCA
CDIP1	5.99791e-09	0.389687	0.625	0.692	8.11338e-05	Control	CDIP1
NAT8L	7.59465e-09	0.522032	0.591	0.639	0.000102733	Control	NAT8L
FBXO2	7.76671e-09	0.551031	0.583	0.657	0.00010506	Control	FBXO2
KNDC1	1.04789e-08	0.15815	0.127	0.232	0.000141749	Control	KNDC1
VXN	1.06015e-08	0.324499	0.656	0.74	0.000143407	Control	VXN
SLC25A48	1.17917e-08	2.69012	0.044	0.013	0.000159506	Control	SLC25A48
SOX9	1.29586e-08	0.381988	0.637	0.691	0.00017529	Control	SOX9
TOB2	3.87624e-08	0.10802	0.229	0.376	0.000524339	Control	TOB2
MLC1	6.65609e-08	0.493816	0.615	0.671	0.00090037	Control	MLC1
PTPRF	8.18141e-08	0.185819	0.159	0.273	0.0011067	Control	PTPRF
DDAH1	8.25678e-08	0.4768	0.584	0.644	0.0011169	Control	DDAH1
PMP2	8.70607e-08	0.266196	0.734	0.809	0.00117767	Control	PMP2
MARCH6	1.25661e-07	0.534117	0.505	0.536	0.00169981	Control	MARCH6
INPP5F	1.29558e-07	1.06894	0.254	0.203	0.00175252	Control	INPP5F
GNAS	1.32145e-07	0.260448	0.676	0.78	0.00178752	Control	GNAS
TUBA4A	2.26544e-07	0.955031	0.281	0.234	0.00306446	Control	TUBA4A
TRAK1	3.41542e-07	0.164008	0.242	0.384	0.00462004	Control	TRAK1
MAPT	3.51272e-07	0.213254	0.844	0.9	0.00475165	Control	MAPT
HSPB1	3.59153e-07	0.564352	0.561	0.641	0.00485826	Control	HSPB1
PLD3	4.10995e-07	0.49473	0.523	0.57	0.00555953	Control	PLD3
B4GALNT4	4.56003e-07	0.172178	0.286	0.455	0.00616835	Control	B4GALNT4
AHCYL1	7.73217e-07	0.207274	0.872	0.948	0.0104593	Control	AHCYL1
FAM171B	8.90408e-07	0.227698	0.75	0.838	0.0120446	Control	FAM171B
COX6C	9.21989e-07	0.289263	0.652	0.778	0.0124717	Control	COX6C
AIFM3	1.09823e-06	0.781821	0.407	0.405	0.0148557	Control	AIFM3
ACSS1	1.13737e-06	0.406495	0.612	0.679	0.0153853	Control	ACSS1
SORBS1	1.25879e-06	0.194152	0.759	0.856	0.0170277	Control	SORBS1
POU3F3	1.54165e-06	0.153714	0.073	0.137	0.0208539	Control	POU3F3
ACSBG1	1.60898e-06	0.105139	0.119	0.199	0.0217647	Control	ACSBG1
HACD3	1.6135e-06	0.349207	0.583	0.612	0.0218259	Control	HACD3
RTN1	1.70788e-06	1.04489	0.272	0.241	0.0231025	Control	RTN1
BMP7	2.13137e-06	0.231406	0.208	0.331	0.028831	Control	BMP7
F3	3.5363e-06	0.634594	0.463	0.472	0.0478355	Control	F3
ALAD	3.63964e-06	0.107747	0.168	0.269	0.0492334	Control	ALAD
MT1X	2.03121e-268	1.42457	0.971	0.712	2.74762e-264	Part	MT1X
MT2A	2.32548e-267	0.933633	0.999	0.96	3.14568e-263	Part	MT2A
S100B	1.16287e-203	0.641447	0.999	0.997	1.57301e-199	Part	S100B
MT1E	5.54888e-152	0.693271	0.991	0.923	7.50597e-148	Part	MT1E
SPP1	7.07045e-134	4.03908	0.369	0.055	9.5642e-130	Part	SPP1
CLU1	1.03003e-116	0.326386	1	1	1.39332e-112	Part	CLU
CRYAB1	4.47766e-101	0.456209	0.999	0.995	6.05693e-97	Part	CRYAB
SERPINA3	1.45595e-100	2.4465	0.574	0.325	1.96946e-96	Part	SERPINA3
ACTB1	4.63849e-97	0.433047	1	0.997	6.27449e-93	Part	ACTB
MT31	5.01572e-79	0.450061	1	0.998	6.78477e-75	Part	MT3
SLC1A3	4.34464e-56	0.430578	0.992	0.97	5.87699e-52	Part	SLC1A3
NTRK2	7.34488e-54	0.320958	0.999	0.996	9.93542e-50	Part	NTRK2
PPDPF	3.09578e-51	0.940454	0.612	0.44	4.18766e-47	Part	PPDPF
APP1	2.71887e-45	0.429177	0.903	0.808	3.67782e-41	Part	APP
HOPX	6.033e-43	0.671407	0.788	0.636	8.16083e-39	Part	HOPX
DTNA	3.49964e-42	0.269266	0.999	0.999	4.73396e-38	Part	DTNA
SPARCL1	1.40823e-40	0.407668	0.939	0.885	1.90491e-36	Part	SPARCL1
YWHAQ	2.12021e-40	0.462686	0.832	0.729	2.868e-36	Part	YWHAQ
CD44	4.34577e-38	0.829879	0.685	0.569	5.87853e-34	Part	CD44
CPE1	4.63866e-35	0.267322	1	1	6.27471e-31	Part	CPE
SCG3	3.74408e-34	0.574339	0.737	0.632	5.06462e-30	Part	SCG3
C1orf61	7.18783e-34	0.423298	0.965	0.93	9.72298e-30	Part	C1orf61
FTL	1.03819e-33	0.246849	0.997	0.974	1.40436e-29	Part	FTL
COPS9	1.14874e-33	0.656249	0.671	0.516	1.5539e-29	Part	COPS9
FTH11	8.86228e-33	0.219898	1	0.99	1.1988e-28	Part	FTH1
TMBIM6	8.4796e-32	0.357992	0.914	0.836	1.14704e-27	Part	TMBIM6
CALM31	1.1895e-30	0.261998	0.954	0.897	1.60904e-26	Part	CALM3
RGR	5.33739e-30	1.56737	0.322	0.174	7.21988e-26	Part	RGR
COX7C1	8.19027e-30	0.302695	0.964	0.916	1.1079e-25	Part	COX7C
ATP5F1E	9.50381e-30	0.450716	0.766	0.679	1.28558e-25	Part	ATP5F1E
SEC11C	9.84942e-30	0.508705	0.748	0.652	1.33233e-25	Part	SEC11C
HNRNPC1	1.47985e-29	0.337689	0.888	0.824	2.00179e-25	Part	HNRNPC
ATP5IF1	3.66869e-28	0.437768	0.765	0.685	4.96263e-24	Part	ATP5IF1
TOMM7	5.59203e-28	0.551545	0.648	0.556	7.56434e-24	Part	TOMM7
ERC1	7.7608e-28	0.579944	0.648	0.553	1.0498e-23	Part	ERC1
UQCRB	2.5796e-24	0.417666	0.746	0.669	3.48943e-20	Part	UQCRB
HIST1H4C	2.74772e-24	0.425161	0.741	0.672	3.71684e-20	Part	HIST1H4C
PRNP1	8.58543e-24	0.246068	0.972	0.942	1.16135e-19	Part	PRNP
GSN	1.24833e-23	0.428268	0.72	0.637	1.68861e-19	Part	GSN
PKIA	1.5461e-23	0.546237	0.702	0.618	2.09141e-19	Part	PKIA
OCIAD11	2.96662e-23	0.307909	0.866	0.812	4.01295e-19	Part	OCIAD1
PEA151	3.15896e-23	0.171537	1	0.998	4.27313e-19	Part	PEA15
GABRA21	6.70485e-23	0.404775	0.84	0.802	9.06965e-19	Part	GABRA2
USP22	4.89216e-21	0.334692	0.781	0.722	6.61763e-17	Part	USP22
NCAM1	6.66806e-21	0.377594	0.751	0.704	9.01989e-17	Part	NCAM1
SERINC1	7.77948e-21	0.608308	0.548	0.487	1.05233e-16	Part	SERINC1
GABARAP	8.5978e-21	0.549778	0.577	0.526	1.16302e-16	Part	GABARAP
SOD11	2.90545e-20	0.196608	0.962	0.944	3.93021e-16	Part	SOD1
LYVE1	8.53581e-20	0.912933	0.32	0.19	1.15464e-15	Part	LYVE1
PABPC1	9.26288e-20	0.759977	0.484	0.42	1.25299e-15	Part	PABPC1
PTK2	1.41376e-19	0.252736	0.866	0.839	1.91239e-15	Part	PTK2
COX6B1	3.09481e-19	0.443764	0.658	0.586	4.18635e-15	Part	COX6B1
CNN3	1.10751e-18	0.37606	0.769	0.721	1.49813e-14	Part	CNN3
MRO	1.52978e-18	0.580667	0.597	0.515	2.06933e-14	Part	MRO
SNAP25	3.63265e-18	0.355536	0.669	0.642	4.91388e-14	Part	SNAP25
MGST1	4.15649e-18	0.401674	0.705	0.63	5.62249e-14	Part	MGST1
NDUFS51	5.15429e-18	0.298009	0.78	0.734	6.97221e-14	Part	NDUFS5
HSP90AA11	1.79757e-17	0.14588	0.994	0.989	2.43157e-13	Part	HSP90AA1
CAMK2N1	4.28265e-17	0.479823	0.593	0.554	5.79313e-13	Part	CAMK2N1
RASD1	7.96608e-17	0.600741	0.533	0.452	1.07757e-12	Part	RASD1
ANK21	2.16212e-16	0.239451	0.927	0.893	2.9247e-12	Part	ANK2
CANX	3.90462e-16	0.707634	0.452	0.373	5.28178e-12	Part	CANX
DYNLL2	4.8928e-16	0.429175	0.631	0.59	6.61849e-12	Part	DYNLL2
UCHL1	8.33159e-16	0.285309	0.714	0.666	1.12701e-11	Part	UCHL1
CD81	2.94e-15	0.219305	0.862	0.837	3.97694e-11	Part	CD81
RHBDD2	3.7701e-15	0.507753	0.572	0.514	5.09981e-11	Part	RHBDD2
PON2	3.80115e-15	0.48925	0.568	0.515	5.14181e-11	Part	PON2
YY1AP1	4.85675e-15	0.350466	0.692	0.64	6.56973e-11	Part	YY1AP1
ATP6V1H	9.42883e-15	0.489493	0.569	0.527	1.27544e-10	Part	ATP6V1H
PFN2	1.17644e-14	0.581662	0.511	0.48	1.59138e-10	Part	PFN2
DKK31	1.22949e-14	0.158686	0.999	0.999	1.66314e-10	Part	DKK3
CD63	1.82176e-14	0.461333	0.571	0.52	2.46429e-10	Part	CD63
KIF5C	5.21363e-14	0.889954	0.387	0.34	7.05248e-10	Part	KIF5C
OGA	5.78413e-14	0.575305	0.546	0.513	7.82419e-10	Part	OGA
COX6C1	7.85224e-14	0.246512	0.758	0.725	1.06217e-09	Part	COX6C
HNRNPDL	1.51768e-13	0.265704	0.747	0.703	2.05296e-09	Part	HNRNPDL
CCDC6	2.13034e-13	0.639677	0.465	0.4	2.88171e-09	Part	CCDC6
MDH1	3.63962e-13	0.591743	0.457	0.382	4.92332e-09	Part	MDH1
DPP10	4.64187e-13	2.01794	0.138	0.068	6.27906e-09	Part	DPP10
TMEM59L1	6.58333e-13	0.185859	0.843	0.83	8.90528e-09	Part	TMEM59L
HNRNPA2B11	8.4613e-13	0.244831	0.791	0.772	1.14456e-08	Part	HNRNPA2B1
PPP2CB1	1.04561e-12	0.130943	0.999	0.995	1.4144e-08	Part	PPP2CB
PTGES31	1.42686e-12	0.189568	0.799	0.777	1.93011e-08	Part	PTGES3
IFITM3	2.6913e-12	0.84165	0.386	0.348	3.64052e-08	Part	IFITM3
DDX17	3.22393e-12	0.208914	0.949	0.909	4.36101e-08	Part	DDX17
DBI	3.71156e-12	0.185987	0.915	0.892	5.02062e-08	Part	DBI
CST31	3.89693e-12	0.120634	0.997	0.993	5.27138e-08	Part	CST3
GLUL	4.51054e-12	0.136565	0.998	0.989	6.10141e-08	Part	GLUL
ACBD7	1.64509e-11	0.333016	0.728	0.696	2.22531e-07	Part	ACBD7
GABARAPL21	1.66348e-11	0.249802	0.728	0.714	2.25019e-07	Part	GABARAPL2
CALR	1.77375e-11	0.941412	0.328	0.268	2.39935e-07	Part	CALR
PFDN5	2.68128e-11	0.711355	0.378	0.313	3.62697e-07	Part	PFDN5
ZFAND5	2.86323e-11	0.302877	0.706	0.658	3.87309e-07	Part	ZFAND5
ATP5MG	3.39727e-11	0.45023	0.512	0.453	4.59549e-07	Part	ATP5MG
EDF1	8.95894e-11	0.407432	0.564	0.542	1.21188e-06	Part	EDF1
EID1	9.86025e-11	0.312956	0.621	0.602	1.3338e-06	Part	EID1
TTC3	1.52327e-10	0.224234	0.705	0.698	2.06052e-06	Part	TTC3
MAPT1	2.41075e-10	0.175523	0.899	0.872	3.26102e-06	Part	MAPT
CCL2	4.0304e-10	1.03125	0.091	0.038	5.45192e-06	Part	CCL2
KIF5A	4.10991e-10	0.221281	0.797	0.747	5.55947e-06	Part	KIF5A
GJA1	4.25681e-10	0.194921	0.974	0.964	5.75819e-06	Part	GJA1
SLIRP	4.9002e-10	0.516575	0.457	0.399	6.6285e-06	Part	SLIRP
WBP21	5.90338e-10	0.151755	0.828	0.81	7.98551e-06	Part	WBP2
LRPAP1	1.3869e-09	0.704768	0.358	0.3	1.87606e-05	Part	LRPAP1
ATP5ME	2.95648e-09	0.332008	0.566	0.54	3.99923e-05	Part	ATP5ME
SOD2	3.15947e-09	0.5161	0.463	0.441	4.27381e-05	Part	SOD2
CADM31	4.15789e-09	0.217388	0.772	0.768	5.62437e-05	Part	CADM3
HACD31	4.37931e-09	0.29761	0.643	0.582	5.92389e-05	Part	HACD3
GMPR	5.40278e-09	0.708363	0.347	0.281	7.30833e-05	Part	GMPR
NUPR1	6.33755e-09	0.45369	0.544	0.527	8.5728e-05	Part	NUPR1
SNRNP70	6.98749e-09	0.205366	0.757	0.745	9.45198e-05	Part	SNRNP70
PNISR	9.94294e-09	0.329818	0.624	0.598	0.000134498	Part	PNISR
N4BP2L2	1.33068e-08	0.488449	0.457	0.432	0.000180001	Part	N4BP2L2
HSPB11	1.8898e-08	0.16249	0.638	0.602	0.000255633	Part	HSPB1
FAM171B1	1.9841e-08	0.217828	0.807	0.809	0.000268389	Part	FAM171B
JUNB	2.2146e-08	1.34128	0.155	0.098	0.000299569	Part	JUNB
LGI11	2.39513e-08	0.191427	0.864	0.871	0.00032399	Part	LGI1
SLC16A9	3.18976e-08	0.611153	0.353	0.282	0.000431479	Part	SLC16A9
NRCAM1	3.53303e-08	0.20087	0.726	0.717	0.000477913	Part	NRCAM
AGT1	8.34966e-08	0.100528	0.958	0.956	0.00112946	Part	AGT
SEM1	8.94555e-08	0.414228	0.454	0.405	0.00121006	Part	SEM1
CRISPLD1	1.18216e-07	1.0182	0.138	0.083	0.00159911	Part	CRISPLD1
KREMEN1	1.46899e-07	0.658168	0.328	0.275	0.00198711	Part	KREMEN1
SCG2	1.8088e-07	0.783909	0.213	0.15	0.00244676	Part	SCG2
AHCYL11	2.36259e-07	0.124539	0.932	0.917	0.00319587	Part	AHCYL1
SFRP2	2.44937e-07	0.539547	0.31	0.241	0.00331326	Part	SFRP2
ETNPPL	2.79992e-07	0.327197	0.817	0.824	0.00378745	Part	ETNPPL
MYLK	2.87228e-07	0.304602	0.578	0.57	0.00388533	Part	MYLK
PTGDS	4.19936e-07	0.124388	0.729	0.712	0.00568048	Part	PTGDS
BCL6	4.27817e-07	0.342042	0.538	0.508	0.00578709	Part	BCL6
TNIK	4.66343e-07	0.242915	0.656	0.647	0.00630822	Part	TNIK
ATP6V1E1	5.31346e-07	0.486378	0.399	0.358	0.00718752	Part	ATP6V1E1
MAP2	5.33622e-07	0.429156	0.462	0.454	0.00721831	Part	MAP2
ATP9A1	6.93428e-07	0.183613	0.708	0.702	0.00938	Part	ATP9A
SYNGR1	8.1201e-07	0.225904	0.612	0.588	0.0109841	Part	SYNGR1
NDFIP11	8.17543e-07	0.152293	0.743	0.748	0.0110589	Part	NDFIP1
PARK7	9.20482e-07	0.170115	0.653	0.652	0.0124514	Part	PARK7
STMN3	1.02774e-06	0.325522	0.49	0.481	0.0139023	Part	STMN3
SRSF5	1.27325e-06	0.352261	0.514	0.513	0.0172233	Part	SRSF5
ATP5PD	1.5278e-06	0.450122	0.415	0.383	0.0206665	Part	ATP5PD
SDC4	1.62102e-06	0.316686	0.644	0.647	0.0219275	Part	SDC4
LTF	1.80048e-06	0.701596	0.135	0.084	0.024355	Part	LTF
FKBP3	2.40708e-06	0.608996	0.35	0.323	0.0325606	Part	FKBP3
ASPH1	2.54676e-06	0.150099	0.783	0.79	0.0344501	Part	ASPH
KLC11	2.68041e-06	0.10773	0.834	0.826	0.0362579	Part	KLC1
SLCO1C1	3.03652e-06	0.573149	0.255	0.193	0.041075	Part	SLCO1C1
RHOBTB3	3.65164e-06	0.19475	0.727	0.703	0.0493957	Part	RHOBTB3
SPARC	2.76024e-252	1.00319	0.971	0.835	3.73378e-248	AD	SPARC
ENC1	3.5347e-186	3.70236	0.407	0.02	4.78139e-182	AD	ENC1
PHYHIP	3.78832e-178	1.97301	0.588	0.087	5.12446e-174	AD	PHYHIP
CNIH2	4.03526e-177	2.43161	0.5	0.056	5.4585e-173	AD	CNIH2
B3GAT1	8.18837e-173	2.45114	0.467	0.046	1.10764e-168	AD	B3GAT1
TP53INP2	2.35284e-168	3.25086	0.396	0.027	3.18268e-164	AD	TP53INP2
ZCCHC24	6.80485e-158	2.8684	0.396	0.031	9.20492e-154	AD	ZCCHC24
PSD	1.10012e-157	2.17316	0.484	0.062	1.48813e-153	AD	PSD
ZNF358	2.51967e-157	2.13385	0.45	0.051	3.40835e-153	AD	ZNF358
SDC3	7.37811e-154	1.98457	0.517	0.079	9.98037e-150	AD	SDC3
CAMK2A	4.62262e-151	1.64437	0.645	0.134	6.25301e-147	AD	CAMK2A
CBX6	6.72413e-149	1.59239	0.602	0.117	9.09573e-145	AD	CBX6
NCOR2	6.78048e-146	2.42028	0.396	0.039	9.17195e-142	AD	NCOR2
SHANK1	1.4668e-145	5.57129	0.283	0.004	1.98414e-141	AD	SHANK1
TXNIP	1.26941e-144	2.2381	0.433	0.053	1.71713e-140	AD	TXNIP
FBXL16	2.82218e-142	3.77368	0.311	0.013	3.81756e-138	AD	FBXL16
LMTK3	2.98895e-141	1.89277	0.475	0.071	4.04315e-137	AD	LMTK3
GIT1	9.00218e-138	1.90582	0.45	0.063	1.21772e-133	AD	GIT1
RGCC	2.95219e-136	3.38659	0.31	0.016	3.99342e-132	AD	RGCC
CNP	4.08177e-132	3.10448	0.315	0.02	5.52141e-128	AD	CNP
CCND3	3.23317e-126	2.13203	0.378	0.045	4.37351e-122	AD	CCND3
SLC17A7	9.05642e-124	1.62887	0.502	0.094	1.22506e-119	AD	SLC17A7
TJP1	1.00724e-122	1.47785	0.546	0.117	1.36249e-118	AD	TJP1
KIF1C	2.46488e-120	2.2601	0.36	0.043	3.33425e-116	AD	KIF1C
AGAP3	1.22055e-119	1.80127	0.409	0.06	1.65104e-115	AD	AGAP3
ATXN1	4.18698e-119	2.55028	0.32	0.029	5.66372e-115	AD	ATXN1
CPLX2	5.45141e-119	1.2887	0.635	0.156	7.37412e-115	AD	CPLX2
BTBD2	6.05863e-117	1.81816	0.384	0.054	8.19551e-113	AD	BTBD2
MAPK3	5.15495e-116	3.35088	0.273	0.016	6.9731e-112	AD	MAPK3
TNS2	9.09446e-116	3.84573	0.253	0.01	1.23021e-111	AD	TNS2
CTXN1	1.21186e-114	1.28378	0.607	0.149	1.63928e-110	AD	CTXN1
CCPG1	2.68177e-112	1.81954	0.382	0.056	3.62763e-108	AD	CCPG1
NOP53	3.87714e-112	3.75998	0.25	0.011	5.24461e-108	AD	NOP53
TNS1	3.89042e-112	3.63729	0.254	0.012	5.26257e-108	AD	TNS1
EIF4G2	3.9623e-112	1.89025	0.384	0.058	5.3598e-108	AD	EIF4G2
NRXN2	1.54317e-111	1.57042	0.433	0.077	2.08744e-107	AD	NRXN2
MLLT6	8.14545e-111	2.08354	0.333	0.039	1.10183e-106	AD	MLLT6
CRIP2	9.24695e-111	2.83532	0.29	0.025	1.25084e-106	AD	CRIP2
SHISA6	1.91499e-110	3.04917	0.269	0.018	2.59041e-106	AD	SHISA6
TNK2	1.24364e-109	4.36625	0.226	0.005	1.68227e-105	AD	TNK2
TSPYL1	1.37256e-109	1.59719	0.434	0.078	1.85666e-105	AD	TSPYL1
LRRC4B	1.10933e-108	1.95402	0.352	0.048	1.5006e-104	AD	LRRC4B
SRSF11	1.35676e-107	1.69796	0.386	0.062	1.83528e-103	AD	SRSF11
NLGN2	2.29804e-107	1.38968	0.493	0.108	3.10856e-103	AD	NLGN2
ZEB2	9.72154e-107	3.19542	0.253	0.015	1.31503e-102	AD	ZEB2
EPN1	1.44798e-106	2.11524	0.301	0.031	1.95869e-102	AD	EPN1
CA11	2.36468e-105	1.81327	0.376	0.06	3.1987e-101	AD	CA11
EEF2	3.17423e-104	1.08222	0.641	0.176	4.29378e-100	AD	EEF2
TNRC6A	1.40135e-103	1.44863	0.429	0.084	1.8956e-99	AD	TNRC6A
GUK1	5.72417e-102	1.10221	0.546	0.133	7.74308e-98	AD	GUK1
ACAP3	6.34812e-102	1.94021	0.329	0.044	8.5871e-98	AD	ACAP3
FAM107A	8.10662e-102	0.459632	0.998	0.992	1.09658e-97	AD	FAM107A
SOWAHA	4.70234e-101	5.20959	0.203	0.004	6.36085e-97	AD	SOWAHA
BSN	1.27402e-99	5.34939	0.201	0.004	1.72336e-95	AD	BSN
KCNN1	3.11548e-98	1.84733	0.33	0.047	4.21432e-94	AD	KCNN1
KIF3C	1.65865e-97	2.3246	0.279	0.029	2.24365e-93	AD	KIF3C
KIF5B	2.72631e-97	2.01039	0.313	0.042	3.68789e-93	AD	KIF5B
EVL	8.15471e-97	3.34599	0.228	0.013	1.10309e-92	AD	EVL
ZBTB7A	1.59191e-96	1.21386	0.458	0.101	2.15337e-92	AD	ZBTB7A
TIMP3	3.19943e-96	1.52832	0.39	0.074	4.32787e-92	AD	TIMP3
DEAF1	3.38656e-95	1.10874	0.55	0.146	4.581e-91	AD	DEAF1
HPCA1	2.46877e-94	1.23957	0.491	0.117	3.33951e-90	AD	HPCA
MAPK8IP2	2.67056e-94	1.07664	0.652	0.204	3.61246e-90	AD	MAPK8IP2
METRN	8.8218e-94	1.03978	0.635	0.207	1.19332e-89	AD	METRN
ULK1	1.38688e-93	2.01746	0.296	0.038	1.87603e-89	AD	ULK1
AGAP2	1.90073e-93	5.62081	0.188	0.003	2.57111e-89	AD	AGAP2
KCNAB2	3.07871e-93	3.33228	0.22	0.012	4.16457e-89	AD	KCNAB2
PRRC2A	4.9781e-93	1.79038	0.317	0.047	6.73387e-89	AD	PRRC2A
DLGAP4	7.28944e-93	3.46145	0.213	0.011	9.86043e-89	AD	DLGAP4
ARHGEF251	3.14509e-92	1.22434	0.47	0.111	4.25437e-88	AD	ARHGEF25
STX1B	8.63364e-92	1.73916	0.344	0.058	1.16787e-87	AD	STX1B
ANKRD40	9.15665e-92	3.27549	0.217	0.012	1.23862e-87	AD	ANKRD40
RNF208	3.79952e-91	1.75902	0.304	0.043	5.13961e-87	AD	RNF208
WSB2	7.58969e-91	1.1366	0.488	0.121	1.02666e-86	AD	WSB2
H2AFV	1.55047e-90	1.52452	0.36	0.066	2.09732e-86	AD	H2AFV
TMCC2	1.84878e-90	1.24263	0.468	0.115	2.50084e-86	AD	TMCC2
HNRNPA0	4.68903e-90	2.03627	0.293	0.04	6.34285e-86	AD	HNRNPA0
CEP170B	1.65394e-89	2.56342	0.237	0.02	2.23729e-85	AD	CEP170B
NACC2	2.85907e-89	1.63175	0.312	0.048	3.86746e-85	AD	NACC2
EEF1A2	3.36191e-89	0.970472	0.601	0.17	4.54765e-85	AD	EEF1A2
CYB5R3	3.86189e-88	1.41673	0.377	0.074	5.22398e-84	AD	CYB5R3
DVL1	1.4589e-87	1.89878	0.278	0.036	1.97346e-83	AD	DVL1
ARF3	7.92968e-87	2.59452	0.237	0.022	1.07265e-82	AD	ARF3
CRKL	9.91391e-87	1.37897	0.372	0.073	1.34105e-82	AD	CRKL
H1FX	3.94453e-86	2.68	0.227	0.019	5.33576e-82	AD	H1FX
ARID1B	5.7742e-86	1.65487	0.324	0.055	7.81076e-82	AD	ARID1B
MAPK8IP1	2.30319e-85	1.20655	0.393	0.084	3.11553e-81	AD	MAPK8IP1
PLEKHM2	5.94551e-85	2.38309	0.236	0.023	8.04249e-81	AD	PLEKHM2
GPR162	2.72428e-84	3.38752	0.196	0.01	3.68513e-80	AD	GPR162
CCDC106	7.75594e-84	1.66404	0.292	0.044	1.04915e-79	AD	CCDC106
PHACTR1	1.57005e-83	3.36454	0.198	0.011	2.12381e-79	AD	PHACTR1
AKAP9	5.94593e-83	1.65511	0.294	0.046	8.04306e-79	AD	AKAP9
MAST3	6.32542e-83	4.69121	0.172	0.004	8.55639e-79	AD	MAST3
ZMYM2	9.8136e-83	1.80191	0.296	0.047	1.32749e-78	AD	ZMYM2
ALDOC	1.68865e-82	5.69178	0.165	0.002	2.28424e-78	AD	ALDOC
NPDC1	1.90918e-82	1.67023	0.298	0.047	2.58255e-78	AD	NPDC1
ADIRF	3.13712e-82	1.05033	0.518	0.148	4.24358e-78	AD	ADIRF
PTTG1IP	3.63567e-82	1.15481	0.446	0.113	4.91798e-78	AD	PTTG1IP
DMWD	5.67423e-82	2.33387	0.231	0.023	7.67553e-78	AD	DMWD
SNCB1	1.22652e-81	1.1908	0.418	0.098	1.65912e-77	AD	SNCB
PNMT	3.19533e-81	2.94011	0.21	0.016	4.32232e-77	AD	PNMT
CTNNB1	3.88911e-81	1.38179	0.36	0.074	5.2608e-77	AD	CTNNB1
KCNQ2	9.23175e-81	4.46662	0.171	0.005	1.24878e-76	AD	KCNQ2
HSPA2	9.36417e-81	1.47102	0.348	0.07	1.26669e-76	AD	HSPA2
PURA	1.71568e-80	2.04002	0.245	0.029	2.3208e-76	AD	PURA
CASKIN1	3.26008e-80	0.98478	0.417	0.101	4.40991e-76	AD	CASKIN1
ZNF385A	3.7325e-80	0.914072	0.439	0.111	5.04895e-76	AD	ZNF385A
SAMD4B	4.0073e-80	1.89173	0.258	0.034	5.42068e-76	AD	SAMD4B
MAPK8IP3	4.97737e-80	1.00871	0.489	0.135	6.73289e-76	AD	MAPK8IP3
SNCA	5.24527e-80	0.994149	0.475	0.125	7.09528e-76	AD	SNCA
DYNC1LI2	6.20427e-80	1.12159	0.476	0.128	8.39252e-76	AD	DYNC1LI2
WNK1	1.61815e-79	1.01257	0.543	0.161	2.18887e-75	AD	WNK1
BRSK1	2.19768e-79	1.39162	0.333	0.064	2.97281e-75	AD	BRSK1
CHDH	3.1776e-79	2.46401	0.229	0.024	4.29834e-75	AD	CHDH
SRSF2	1.02676e-78	2.30021	0.237	0.027	1.3889e-74	AD	SRSF2
NBL11	1.11789e-78	1.15952	0.379	0.083	1.51217e-74	AD	NBL1
SAMD4A	1.12466e-78	1.21267	0.377	0.086	1.52133e-74	AD	SAMD4A
ZMIZ2	1.31928e-78	1.00853	0.457	0.121	1.7846e-74	AD	ZMIZ2
ITPR2	2.3675e-78	2.03493	0.228	0.024	3.20252e-74	AD	ITPR2
ARHGEF40	3.44067e-78	1.66191	0.262	0.037	4.65419e-74	AD	ARHGEF40
PACS2	1.77039e-77	1.01268	0.448	0.117	2.39481e-73	AD	PACS2
MEGF8	2.52788e-77	2.22866	0.22	0.022	3.41946e-73	AD	MEGF8
CASC3	4.54188e-77	1.29557	0.386	0.091	6.1438e-73	AD	CASC3
CSNK1G2	9.78962e-77	1.59599	0.298	0.053	1.32424e-72	AD	CSNK1G2
MARCKSL1	4.35861e-76	1.71733	0.279	0.045	5.8959e-72	AD	MARCKSL1
GNAI2	6.12697e-76	2.39237	0.226	0.026	8.28795e-72	AD	GNAI2
GRIK5	7.40809e-76	1.56285	0.303	0.055	1.00209e-71	AD	GRIK5
NCL	5.25397e-75	1.29509	0.357	0.079	7.10705e-71	AD	NCL
CELSR2	8.4552e-75	3.66485	0.169	0.008	1.14373e-70	AD	CELSR2
TBC1D9B	9.70301e-75	1.31192	0.332	0.069	1.31253e-70	AD	TBC1D9B
TRIP6	2.29293e-74	1.45963	0.277	0.047	3.10164e-70	AD	TRIP6
AUTS2	3.08423e-74	1.93471	0.234	0.03	4.17204e-70	AD	AUTS2
RUNDC3A	1.43315e-73	0.94972	0.465	0.129	1.93862e-69	AD	RUNDC3A
GSTP1	3.33328e-73	2.69592	0.197	0.017	4.50893e-69	AD	GSTP1
SH3BGRL2	6.09845e-73	2.30079	0.213	0.023	8.24937e-69	AD	SH3BGRL2
HDGFL3	6.73257e-73	2.08257	0.238	0.032	9.10714e-69	AD	HDGFL3
ANP32B	1.46679e-72	3.0257	0.182	0.013	1.98412e-68	AD	ANP32B
DBN1	1.50925e-72	2.24602	0.222	0.027	2.04157e-68	AD	DBN1
ITPK1	1.60262e-72	0.793733	0.62	0.212	2.16786e-68	AD	ITPK1
PPP6R1	2.02716e-72	2.55458	0.19	0.016	2.74213e-68	AD	PPP6R1
DHRS3	2.33034e-72	1.16107	0.336	0.074	3.15225e-68	AD	DHRS3
KIAA1671	2.42926e-72	0.952692	0.409	0.107	3.28605e-68	AD	KIAA1671
ABAT	3.61167e-72	0.8527	0.515	0.156	4.8855e-68	AD	ABAT
KLF15	3.95992e-72	1.00077	0.457	0.13	5.35658e-68	AD	KLF15
TSC22D1	9.06046e-72	1.8776	0.239	0.033	1.22561e-67	AD	TSC22D1
PREX1	2.1535e-71	1.30982	0.349	0.081	2.91304e-67	AD	PREX1
KLHDC3	2.57821e-71	1.92322	0.223	0.027	3.48754e-67	AD	KLHDC3
TAF15	2.58645e-71	0.925298	0.501	0.152	3.49869e-67	AD	TAF15
TAOK2	3.69113e-71	2.65056	0.188	0.016	4.993e-67	AD	TAOK2
SMG1	4.2148e-71	2.3083	0.199	0.019	5.70137e-67	AD	SMG1
NTNG2	4.34348e-71	0.951095	0.402	0.105	5.87543e-67	AD	NTNG2
SOX21	4.91571e-71	2.18914	0.203	0.021	6.64948e-67	AD	SOX21
ABCC5	1.00268e-70	2.74265	0.183	0.014	1.35632e-66	AD	ABCC5
FAM171A2	1.15565e-70	1.7597	0.242	0.035	1.56325e-66	AD	FAM171A2
SNPH	1.4842e-70	1.07516	0.417	0.112	2.00768e-66	AD	SNPH
TCF4	3.5953e-70	2.24718	0.213	0.025	4.86336e-66	AD	TCF4
CAPG	4.40059e-70	1.56149	0.246	0.037	5.95268e-66	AD	CAPG
NSD3	6.69343e-70	1.1887	0.345	0.079	9.05421e-66	AD	NSD3
OPTN	9.44802e-70	1.36973	0.295	0.057	1.27803e-65	AD	OPTN
PAFAH1B2	1.16177e-69	1.9932	0.226	0.03	1.57153e-65	AD	PAFAH1B2
MAP2K2	1.90642e-69	1.28536	0.316	0.067	2.57881e-65	AD	MAP2K2
TOLLIP	2.44101e-69	0.840637	0.481	0.142	3.30195e-65	AD	TOLLIP
RAB11FIP3	4.0645e-69	1.19919	0.349	0.082	5.49805e-65	AD	RAB11FIP3
MPRIP	6.25548e-69	1.32354	0.279	0.052	8.46178e-65	AD	MPRIP
PLPPR2	2.20656e-68	0.743543	0.543	0.174	2.98481e-64	AD	PLPPR2
MYO10	5.62363e-68	1.45862	0.284	0.055	7.60708e-64	AD	MYO10
SASH1	1.41735e-67	0.915585	0.375	0.096	1.91726e-63	AD	SASH1
DGCR2	1.46943e-67	1.95639	0.223	0.031	1.9877e-63	AD	DGCR2
GOLIM4	1.78105e-67	2.1801	0.196	0.021	2.40922e-63	AD	GOLIM4
LRRC8A	2.21956e-67	0.880911	0.386	0.101	3.0024e-63	AD	LRRC8A
SORBS3	2.55596e-67	1.2712	0.258	0.044	3.45745e-63	AD	SORBS3
MATR3	2.80582e-67	1.3104	0.289	0.057	3.79543e-63	AD	MATR3
PCBP1	2.8174e-67	1.0727	0.362	0.089	3.8111e-63	AD	PCBP1
TSPYL4	4.09624e-67	0.880844	0.488	0.149	5.54099e-63	AD	TSPYL4
UBE2H	5.06928e-67	1.49612	0.263	0.047	6.85721e-63	AD	UBE2H
GOLGB1	7.85006e-67	1.0522	0.37	0.094	1.06188e-62	AD	GOLGB1
MCRIP1	1.08521e-66	0.931678	0.393	0.103	1.46796e-62	AD	MCRIP1
LAMTOR1	1.40654e-66	1.51491	0.274	0.052	1.90263e-62	AD	LAMTOR1
PHF10	1.82992e-66	2.36976	0.19	0.02	2.47533e-62	AD	PHF10
HIST1H1E	2.07112e-66	4.41116	0.14	0.004	2.8016e-62	AD	HIST1H1E
CCDC85B	2.35058e-66	4.52055	0.14	0.004	3.17963e-62	AD	CCDC85B
PTK2B	2.93928e-66	4.14729	0.144	0.005	3.97597e-62	AD	PTK2B
INF2	3.58087e-66	2.97457	0.162	0.01	4.84384e-62	AD	INF2
RNF157	4.24097e-66	1.06244	0.327	0.075	5.73676e-62	AD	RNF157
KANK1	4.95268e-66	1.57617	0.219	0.03	6.69949e-62	AD	KANK1
ARHGEF11	6.70488e-66	1.47852	0.262	0.048	9.06969e-62	AD	ARHGEF11
NEFL	7.41593e-66	1.46651	0.272	0.051	1.00315e-61	AD	NEFL
ABCA2	1.28578e-65	1.10412	0.336	0.08	1.73927e-61	AD	ABCA2
NBR1	1.39136e-65	1.51978	0.261	0.047	1.88209e-61	AD	NBR1
ITGB5	2.07033e-65	0.795442	0.327	0.075	2.80054e-61	AD	ITGB5
KTN1	2.45159e-65	2.03647	0.209	0.027	3.31626e-61	AD	KTN1
RALBP1	2.67313e-65	2.46291	0.183	0.018	3.61594e-61	AD	RALBP1
MFSD111	3.29055e-65	1.3989	0.284	0.059	4.45112e-61	AD	MFSD11
VEGFB	3.35973e-65	1.86494	0.219	0.031	4.54471e-61	AD	VEGFB
ANKRD36C	3.55574e-65	1.4686	0.269	0.051	4.80985e-61	AD	ANKRD36C
SH3BP2	4.62261e-65	2.04863	0.192	0.021	6.253e-61	AD	SH3BP2
SPAG9	6.02762e-65	1.1318	0.326	0.077	8.15356e-61	AD	SPAG9
ROM1	6.57293e-65	1.80429	0.236	0.038	8.8912e-61	AD	ROM1
INPPL1	1.19465e-64	1.71675	0.224	0.034	1.61601e-60	AD	INPPL1
FRA10AC1	1.57137e-64	1.86505	0.215	0.03	2.12559e-60	AD	FRA10AC1
GTF2F1	1.81262e-64	1.89568	0.21	0.028	2.45194e-60	AD	GTF2F1
DNM1	2.77012e-64	2.31363	0.197	0.023	3.74714e-60	AD	DNM1
ZFAND3	4.0323e-64	2.16145	0.193	0.022	5.45449e-60	AD	ZFAND3
COPA	4.79297e-64	1.99137	0.206	0.027	6.48345e-60	AD	COPA
YTHDC1	1.01143e-63	1.80036	0.225	0.035	1.36816e-59	AD	YTHDC1
HNRNPU	1.07639e-63	1.19669	0.312	0.071	1.45603e-59	AD	HNRNPU
STUB1	1.46245e-63	1.20065	0.311	0.07	1.97826e-59	AD	STUB1
MFHAS1	1.81892e-63	1.15269	0.264	0.051	2.46045e-59	AD	MFHAS1
WAC	2.05042e-63	0.904332	0.407	0.116	2.7736e-59	AD	WAC
ANKRD11	2.39546e-63	1.4415	0.248	0.044	3.24034e-59	AD	ANKRD11
SPTBN1	2.41267e-63	0.696906	0.638	0.235	3.26362e-59	AD	SPTBN1
PIK3R1	3.93937e-63	1.23428	0.27	0.053	5.32879e-59	AD	PIK3R1
ANTXR1	4.05392e-63	0.727374	0.518	0.172	5.48373e-59	AD	ANTXR1
FUS	4.38737e-63	0.883317	0.416	0.121	5.93479e-59	AD	FUS
PAIP2	7.59337e-63	0.842579	0.468	0.147	1.02715e-58	AD	PAIP2
SCART1	7.82135e-63	6.05898	0.123	0.001	1.05799e-58	AD	SCART1
SLC41A1	8.3102e-63	1.06339	0.285	0.06	1.12412e-58	AD	SLC41A1
SCRN1	1.14184e-62	0.757756	0.64	0.248	1.54457e-58	AD	SCRN1
SAMD14	1.51853e-62	1.27064	0.252	0.047	2.05412e-58	AD	SAMD14
POM121	1.52541e-62	2.9524	0.156	0.011	2.06342e-58	AD	POM121
PAPOLA1	1.86789e-62	0.997479	0.35	0.089	2.52669e-58	AD	PAPOLA
KPNA4	1.98823e-62	1.17796	0.302	0.068	2.68948e-58	AD	KPNA4
MDM4	2.1074e-62	1.43316	0.276	0.057	2.85068e-58	AD	MDM4
MAZ	3.0481e-62	1.90561	0.207	0.029	4.12317e-58	AD	MAZ
C18orf32	5.23156e-62	1.35246	0.294	0.066	7.07674e-58	AD	C18orf32
PREX2	5.64326e-62	0.692636	0.43	0.128	7.63364e-58	AD	PREX2
FUBP1	6.65119e-62	2.25135	0.181	0.02	8.99707e-58	AD	FUBP1
SYNE1	7.90495e-62	0.732519	0.497	0.16	1.0693e-57	AD	SYNE1
SERBP1	1.04978e-61	1.25652	0.299	0.068	1.42004e-57	AD	SERBP1
NDST1	1.11962e-61	1.99354	0.189	0.023	1.51451e-57	AD	NDST1
AJM1	1.22172e-61	1.60524	0.232	0.039	1.65262e-57	AD	AJM1
AHDC1	1.29476e-61	0.867894	0.335	0.084	1.75143e-57	AD	AHDC1
RNF130	1.81718e-61	1.98254	0.201	0.027	2.4581e-57	AD	RNF130
PDXP	1.88792e-61	2.68906	0.157	0.012	2.5538e-57	AD	PDXP
CCM2	1.91609e-61	3.20718	0.144	0.008	2.59189e-57	AD	CCM2
SEC62	2.09773e-61	0.826887	0.476	0.153	2.8376e-57	AD	SEC62
CSGALNACT1	3.28196e-61	1.02862	0.295	0.066	4.43951e-57	AD	CSGALNACT1
BTBD7	3.37958e-61	1.22291	0.297	0.067	4.57156e-57	AD	BTBD7
RBM33	5.50819e-61	2.03065	0.199	0.027	7.45092e-57	AD	RBM33
GPBP1	5.75544e-61	2.68417	0.16	0.013	7.78538e-57	AD	GPBP1
SFPQ	6.64837e-61	0.692738	0.571	0.201	8.99325e-57	AD	SFPQ
NCOA1	7.03805e-61	0.829259	0.406	0.119	9.52038e-57	AD	NCOA1
GRAMD1B	7.24181e-61	1.04569	0.358	0.097	9.796e-57	AD	GRAMD1B
CASTOR3	7.74496e-61	1.14902	0.302	0.071	1.04766e-56	AD	CASTOR3
SLC35E2B	1.09738e-60	1.49645	0.237	0.042	1.48442e-56	AD	SLC35E2B
KALRN	1.1152e-60	1.80493	0.224	0.037	1.50854e-56	AD	KALRN
MOB1B	2.46772e-60	0.968277	0.372	0.104	3.33809e-56	AD	MOB1B
SOBP	3.98593e-60	1.68891	0.219	0.035	5.39177e-56	AD	SOBP
BRI3	4.31188e-60	1.13807	0.305	0.072	5.83269e-56	AD	BRI3
NDN	4.9735e-60	1.91642	0.201	0.028	6.72765e-56	AD	NDN
WWOX	5.2166e-60	0.77015	0.413	0.125	7.05649e-56	AD	WWOX
RAB31	5.35499e-60	0.882014	0.427	0.132	7.24369e-56	AD	RAB31
FARP1	9.02246e-60	0.636578	0.491	0.163	1.22047e-55	AD	FARP1
DNAJC5	1.22878e-59	1.19016	0.287	0.065	1.66217e-55	AD	DNAJC5
NCK2	1.33903e-59	2.76013	0.161	0.014	1.8113e-55	AD	NCK2
WDTC1	2.59619e-59	1.62154	0.218	0.035	3.51186e-55	AD	WDTC1
MTUS1	2.63007e-59	2.01723	0.197	0.027	3.55769e-55	AD	MTUS1
PPM1A	2.63972e-59	1.9782	0.195	0.027	3.57075e-55	AD	PPM1A
SF1	2.69715e-59	1.09485	0.299	0.07	3.64843e-55	AD	SF1
PPP1R12C	2.97383e-59	0.695422	0.48	0.156	4.0227e-55	AD	PPP1R12C
PFKL	3.49397e-59	0.911446	0.361	0.1	4.72629e-55	AD	PFKL
MYH9	3.65339e-59	4.26394	0.128	0.004	4.94194e-55	AD	MYH9
FBXW4	3.89026e-59	0.982248	0.383	0.112	5.26235e-55	AD	FBXW4
APCDD1	4.13098e-59	0.632686	0.45	0.144	5.58798e-55	AD	APCDD1
KBTBD11	4.21307e-59	0.679312	0.36	0.098	5.69902e-55	AD	KBTBD11
VEGFA	4.36734e-59	1.51416	0.241	0.045	5.9077e-55	AD	VEGFA
CELF2	1.2999e-58	0.882502	0.393	0.115	1.75838e-54	AD	CELF2
HIST1H4B	2.02663e-58	1.85352	0.172	0.019	2.74142e-54	AD	HIST1H4B
C6orf62	2.52831e-58	1.04862	0.341	0.092	3.42005e-54	AD	C6orf62
MAP6	2.79837e-58	1.51397	0.226	0.039	3.78536e-54	AD	MAP6
KMT2D	3.38736e-58	2.87135	0.145	0.01	4.58208e-54	AD	KMT2D
MCL1	3.56017e-58	1.58927	0.214	0.035	4.81584e-54	AD	MCL1
ZC3H13	3.74017e-58	2.43891	0.172	0.019	5.05933e-54	AD	ZC3H13
PCNX2	4.65081e-58	0.990015	0.374	0.107	6.29115e-54	AD	PCNX2
CDC42BPB	8.60596e-58	1.05497	0.29	0.067	1.16413e-53	AD	CDC42BPB
RERE	9.81706e-58	0.701539	0.5	0.17	1.32795e-53	AD	RERE
SKI	1.15025e-57	2.55856	0.161	0.016	1.55595e-53	AD	SKI
GNG7	1.37763e-57	0.794711	0.385	0.113	1.86353e-53	AD	GNG7
FAT3	1.55537e-57	1.19757	0.268	0.058	2.10395e-53	AD	FAT3
TUBG2	2.65192e-57	1.71531	0.192	0.027	3.58726e-53	AD	TUBG2
ABCA3	3.65315e-57	1.88335	0.195	0.028	4.94161e-53	AD	ABCA3
DLGAP1	3.75737e-57	3.25158	0.136	0.008	5.08259e-53	AD	DLGAP1
MAP7D1	4.24803e-57	0.662342	0.492	0.165	5.74631e-53	AD	MAP7D1
KHDRBS1	4.26363e-57	1.01551	0.297	0.071	5.76741e-53	AD	KHDRBS1
ACBD5	4.32582e-57	2.63886	0.153	0.013	5.85154e-53	AD	ACBD5
EPB41L2	4.66646e-57	2.48115	0.156	0.014	6.31232e-53	AD	EPB41L2
NRGN	4.99623e-57	0.596927	0.638	0.227	6.75839e-53	AD	NRGN
BCAR3	8.06467e-57	2.3347	0.162	0.016	1.09091e-52	AD	BCAR3
AP2A2	8.54677e-57	1.02706	0.321	0.084	1.15612e-52	AD	AP2A2
TNFSF13	9.6208e-57	1.18247	0.243	0.048	1.30141e-52	AD	TNFSF13
RND2	1.10239e-56	2.13078	0.169	0.019	1.4912e-52	AD	RND2
CAMTA2	1.1755e-56	2.28896	0.158	0.015	1.5901e-52	AD	CAMTA2
ROBO3	1.47003e-56	1.02869	0.307	0.077	1.9885e-52	AD	ROBO3
EIF1	1.70714e-56	0.779214	0.421	0.13	2.30924e-52	AD	EIF1
WDFY3	2.257e-56	1.19502	0.25	0.051	3.05304e-52	AD	WDFY3
MLLT111	2.94538e-56	0.698667	0.46	0.149	3.98422e-52	AD	MLLT11
NUMA1	3.0965e-56	0.903029	0.331	0.089	4.18864e-52	AD	NUMA1
ZNF219	3.13929e-56	2.2213	0.164	0.017	4.24652e-52	AD	ZNF219
ABCA1	3.14507e-56	1.50686	0.198	0.03	4.25433e-52	AD	ABCA1
RNF146	4.58829e-56	1.29601	0.277	0.065	6.20658e-52	AD	RNF146
SIPA1L3	5.26022e-56	4.59251	0.118	0.003	7.1155e-52	AD	SIPA1L3
DYNC1H1	1.18557e-55	0.717914	0.426	0.135	1.60373e-51	AD	DYNC1H1
FOXN3	1.30337e-55	2.00736	0.187	0.027	1.76307e-51	AD	FOXN3
CAT	1.46512e-55	1.11552	0.243	0.05	1.98186e-51	AD	CAT
SMARCA5	1.54237e-55	2.22565	0.174	0.022	2.08636e-51	AD	SMARCA5
CCND2	2.40062e-55	2.50903	0.155	0.015	3.24732e-51	AD	CCND2
RNPS1	2.5302e-55	1.68137	0.211	0.036	3.4226e-51	AD	RNPS1
SCAF1	2.5895e-55	2.46245	0.149	0.013	3.50282e-51	AD	SCAF1
BCLAF1	3.19029e-55	0.921036	0.316	0.083	4.3155e-51	AD	BCLAF1
ARHGDIA	3.45299e-55	1.44594	0.216	0.038	4.67086e-51	AD	ARHGDIA
CTBP1	4.83052e-55	0.675386	0.433	0.138	6.53425e-51	AD	CTBP1
NAB1	6.10717e-55	1.74963	0.189	0.027	8.26117e-51	AD	NAB1
PRPF8	7.06521e-55	2.27412	0.153	0.015	9.55712e-51	AD	PRPF8
ZBTB4	7.56272e-55	1.13854	0.25	0.053	1.02301e-50	AD	ZBTB4
R3HDM2	8.07031e-55	1.82137	0.186	0.027	1.09167e-50	AD	R3HDM2
TRIR	8.63351e-55	1.38346	0.22	0.04	1.16785e-50	AD	TRIR
ARHGAP35	1.13386e-54	0.631185	0.436	0.142	1.53378e-50	AD	ARHGAP35
TMEM259	1.50781e-54	0.954808	0.304	0.078	2.03962e-50	AD	TMEM259
CAPS	2.03911e-54	0.71168	0.51	0.187	2.7583e-50	AD	CAPS
CASTOR1	2.12289e-54	1.48183	0.199	0.032	2.87164e-50	AD	CASTOR1
ASXL2	2.30575e-54	3.01025	0.136	0.009	3.11899e-50	AD	ASXL2
SRGAP1	2.42707e-54	1.47327	0.199	0.032	3.2831e-50	AD	SRGAP1
MAPKAP1	2.49956e-54	2.03212	0.168	0.02	3.38115e-50	AD	MAPKAP1
ZNF444	2.80296e-54	0.838285	0.29	0.072	3.79156e-50	AD	ZNF444
COG1	3.3333e-54	3.39844	0.128	0.007	4.50895e-50	AD	COG1
SIPA1L1	3.44038e-54	1.23313	0.248	0.053	4.6538e-50	AD	SIPA1L1
INTS1	5.02402e-54	2.24243	0.16	0.018	6.79599e-50	AD	INTS1
PLEKHA2	5.03128e-54	1.14792	0.324	0.092	6.80581e-50	AD	PLEKHA2
HIF3A	5.46689e-54	0.569215	0.681	0.285	7.39506e-50	AD	HIF3A
SETD3	9.1237e-54	0.664893	0.527	0.188	1.23416e-49	AD	SETD3
ZNF609	1.16781e-53	0.69491	0.481	0.166	1.5797e-49	AD	ZNF609
THRAP3	1.397e-53	1.74301	0.182	0.026	1.88972e-49	AD	THRAP3
FOXK1	1.64043e-53	2.80481	0.13	0.008	2.21901e-49	AD	FOXK1
FJX1	1.77846e-53	1.43045	0.208	0.037	2.40573e-49	AD	FJX1
PSIP1	2.16917e-53	0.989046	0.306	0.08	2.93424e-49	AD	PSIP1
GATAD2A	2.40093e-53	2.14711	0.155	0.016	3.24774e-49	AD	GATAD2A
AXL	2.89615e-53	1.45129	0.196	0.032	3.91763e-49	AD	AXL
ACOT7	2.96309e-53	0.59131	0.618	0.241	4.00818e-49	AD	ACOT7
PPFIA2	2.98011e-53	2.72546	0.147	0.014	4.0312e-49	AD	PPFIA2
NR1H2	3.30125e-53	3.02701	0.132	0.009	4.46559e-49	AD	NR1H2
CAPNS1	3.67196e-53	1.17462	0.251	0.055	4.96706e-49	AD	CAPNS1
PPP1R16A	4.09871e-53	1.67137	0.168	0.021	5.54433e-49	AD	PPP1R16A
KAT2B	4.41103e-53	1.47318	0.213	0.039	5.96681e-49	AD	KAT2B
EIF4G3	5.11862e-53	1.84894	0.185	0.028	6.92396e-49	AD	EIF4G3
CDV3	5.44868e-53	3.34053	0.125	0.007	7.37043e-49	AD	CDV3
ENAH1	5.69202e-53	1.15835	0.277	0.068	7.69959e-49	AD	ENAH
ARHGAP39	6.21023e-53	0.657499	0.332	0.093	8.40058e-49	AD	ARHGAP39
LRP3	8.83073e-53	2.49104	0.14	0.012	1.19453e-48	AD	LRP3
LENG81	1.12641e-52	0.689374	0.439	0.147	1.5237e-48	AD	LENG8
MAP3K10	1.16795e-52	2.84021	0.14	0.012	1.57989e-48	AD	MAP3K10
MTA1	1.18081e-52	1.20344	0.249	0.055	1.59728e-48	AD	MTA1
PPIB	1.226e-52	1.52737	0.213	0.039	1.65842e-48	AD	PPIB
RBM26	1.28339e-52	1.4188	0.222	0.043	1.73605e-48	AD	RBM26
KSR1	1.32745e-52	2.08241	0.165	0.021	1.79564e-48	AD	KSR1
H3F3B	1.4477e-52	0.962974	0.293	0.075	1.95831e-48	AD	H3F3B
DDX42	2.45906e-52	1.88775	0.175	0.024	3.32637e-48	AD	DDX42
LASP1	2.61448e-52	1.00267	0.284	0.072	3.53661e-48	AD	LASP1
TAB2	3.13946e-52	0.71034	0.343	0.099	4.24674e-48	AD	TAB2
RABL6	3.20242e-52	0.803236	0.344	0.101	4.33192e-48	AD	RABL6
TCF7L2	3.35546e-52	1.11743	0.227	0.047	4.53893e-48	AD	TCF7L2
CMIP	4.27037e-52	2.79403	0.13	0.009	5.77653e-48	AD	CMIP
SGPP1	4.376e-52	2.80041	0.13	0.009	5.91941e-48	AD	SGPP1
ENHO	4.83325e-52	0.573766	0.88	0.635	6.53794e-48	AD	ENHO
LRP10	5.63237e-52	1.53835	0.21	0.039	7.61891e-48	AD	LRP10
DZIP1	5.64708e-52	1.46509	0.213	0.041	7.63881e-48	AD	DZIP1
USP47	5.80171e-52	1.97508	0.168	0.022	7.84798e-48	AD	USP47
ABHD8	7.85323e-52	0.66898	0.425	0.142	1.06231e-47	AD	ABHD8
BMP2K	9.17975e-52	0.669937	0.349	0.104	1.24175e-47	AD	BMP2K
SNX1	1.11191e-51	3.49288	0.122	0.007	1.50408e-47	AD	SNX1
BCAN	1.16348e-51	0.70663	0.551	0.217	1.57384e-47	AD	BCAN
WDR45B	1.25298e-51	2.29381	0.152	0.017	1.6949e-47	AD	WDR45B
NR2F1	1.42587e-51	0.570412	0.537	0.204	1.92877e-47	AD	NR2F1
TBL1XR1	1.46714e-51	1.66674	0.192	0.032	1.98459e-47	AD	TBL1XR1
PTMS	1.53446e-51	0.524439	0.652	0.25	2.07567e-47	AD	PTMS
HDGF	1.73939e-51	1.20798	0.251	0.058	2.35287e-47	AD	HDGF
HNRNPR	1.81455e-51	1.75456	0.191	0.032	2.45454e-47	AD	HNRNPR
NCBP2	1.84701e-51	2.05201	0.165	0.021	2.49845e-47	AD	NCBP2
DACT3	2.64112e-51	1.55683	0.178	0.027	3.57264e-47	AD	DACT3
AHNAK	2.98823e-51	0.614359	0.618	0.25	4.04217e-47	AD	AHNAK
PNPLA2	3.41167e-51	1.16669	0.244	0.055	4.61497e-47	AD	PNPLA2
ARGLU1	3.43631e-51	0.646444	0.696	0.299	4.6483e-47	AD	ARGLU1
RIN2	3.43997e-51	3.5534	0.121	0.007	4.65324e-47	AD	RIN2
KCTD15	4.08793e-51	0.983099	0.298	0.08	5.52974e-47	AD	KCTD15
PRICKLE2	5.08547e-51	1.96197	0.169	0.023	6.87911e-47	AD	PRICKLE2
TSPAN33	7.88423e-51	1.9373	0.149	0.016	1.0665e-46	AD	TSPAN33
WNK2	7.99735e-51	1.09255	0.255	0.06	1.0818e-46	AD	WNK2
SNU13	1.01019e-50	1.26623	0.232	0.05	1.36649e-46	AD	SNU13
DDAH2	1.68528e-50	1.92705	0.168	0.023	2.27968e-46	AD	DDAH2
LARP1	1.69328e-50	1.00744	0.286	0.075	2.2905e-46	AD	LARP1
GAS7	1.81272e-50	2.70704	0.131	0.01	2.45206e-46	AD	GAS7
DMTN	2.02846e-50	0.594823	0.562	0.209	2.74389e-46	AD	DMTN
KNDC11	2.04918e-50	0.554896	0.37	0.114	2.77192e-46	AD	KNDC1
ATP9B	2.05259e-50	0.77752	0.439	0.153	2.77653e-46	AD	ATP9B
SCN1B	2.13569e-50	3.39814	0.118	0.006	2.88894e-46	AD	SCN1B
VIM	2.28596e-50	0.620369	0.514	0.186	3.09222e-46	AD	VIM
CBARP	2.49077e-50	1.17552	0.231	0.05	3.36926e-46	AD	CBARP
BLCAP	3.07531e-50	1.27318	0.223	0.046	4.15997e-46	AD	BLCAP
RAB13	3.13662e-50	4.10758	0.107	0.003	4.2429e-46	AD	RAB13
MAP1A	3.24035e-50	0.599111	0.733	0.327	4.38322e-46	AD	MAP1A
ZNF106	3.34066e-50	1.78422	0.176	0.027	4.51891e-46	AD	ZNF106
BAP1	3.42206e-50	4.25257	0.107	0.003	4.62903e-46	AD	BAP1
CTSB	3.53353e-50	0.767963	0.372	0.117	4.77981e-46	AD	CTSB
CACNG7	3.54128e-50	2.14454	0.158	0.02	4.7903e-46	AD	CACNG7
CHST1	3.89247e-50	0.781724	0.274	0.069	5.26534e-46	AD	CHST1
REX1BD	4.86254e-50	1.85662	0.18	0.029	6.57756e-46	AD	REX1BD
NFIC	4.88476e-50	0.746105	0.365	0.114	6.60761e-46	AD	NFIC
PRRC2C	5.54179e-50	0.558357	0.513	0.187	7.49638e-46	AD	PRRC2C
MTURN	6.60742e-50	0.499672	0.917	0.779	8.93785e-46	AD	MTURN
CMPK1	8.64907e-50	1.26969	0.246	0.057	1.16996e-45	AD	CMPK1
ID3	8.94688e-50	1.1502	0.275	0.071	1.21024e-45	AD	ID3
RAB11B	9.63435e-50	1.4151	0.196	0.035	1.30324e-45	AD	RAB11B
REEP2	1.13696e-49	0.555701	0.533	0.199	1.53796e-45	AD	REEP2
WIPI2	1.49443e-49	1.30652	0.208	0.04	2.02152e-45	AD	WIPI2
PDGFRB	1.67327e-49	0.799349	0.281	0.074	2.26344e-45	AD	PDGFRB
ABHD2	1.68379e-49	1.41558	0.203	0.039	2.27766e-45	AD	ABHD2
EPN2	1.82882e-49	5.56912	0.101	0.002	2.47384e-45	AD	EPN2
MVB12B	1.86044e-49	1.82785	0.168	0.024	2.51662e-45	AD	MVB12B
ATXN7L3B	2.10002e-49	0.523694	0.514	0.186	2.8407e-45	AD	ATXN7L3B
HIPK1	2.12852e-49	4.23459	0.107	0.004	2.87924e-45	AD	HIPK1
ZNF423	2.15343e-49	1.50225	0.178	0.028	2.91294e-45	AD	ZNF423
DEXI	2.3321e-49	1.49874	0.192	0.034	3.15463e-45	AD	DEXI
CTDSP2	2.38547e-49	1.03189	0.278	0.073	3.22682e-45	AD	CTDSP2
SPART	2.47153e-49	1.67382	0.179	0.029	3.34324e-45	AD	SPART
TXNL1	2.85925e-49	0.793024	0.319	0.091	3.86771e-45	AD	TXNL1
TMEM8B	3.22646e-49	1.50451	0.207	0.041	4.36443e-45	AD	TMEM8B
SETD2	3.3305e-49	1.58914	0.196	0.036	4.50517e-45	AD	SETD2
TIMP2	3.52608e-49	1.13829	0.213	0.043	4.76972e-45	AD	TIMP2
FBRS	3.61452e-49	3.00519	0.12	0.008	4.88936e-45	AD	FBRS
UBE2E2	3.63317e-49	1.7279	0.177	0.028	4.91459e-45	AD	UBE2E2
MGAT4B	3.67862e-49	3.0101	0.12	0.008	4.97606e-45	AD	MGAT4B
HNRNPH3	3.96829e-49	0.877072	0.337	0.102	5.3679e-45	AD	HNRNPH3
ZFR	4.38426e-49	1.11733	0.264	0.067	5.93059e-45	AD	ZFR
STMN2	6.08098e-49	1.91557	0.173	0.027	8.22575e-45	AD	STMN2
CRYL1	6.46108e-49	1.29333	0.218	0.046	8.7399e-45	AD	CRYL1
MLLT1	6.79775e-49	4.98682	0.1	0.002	9.19531e-45	AD	MLLT1
TCP11L1	7.28441e-49	2.36127	0.136	0.013	9.85362e-45	AD	TCP11L1
PLXNB2	7.8604e-49	0.383796	0.5	0.184	1.06328e-44	AD	PLXNB2
HSDL2	9.17092e-49	0.893787	0.298	0.084	1.24055e-44	AD	HSDL2
ALDH3A2	9.33358e-49	1.08337	0.275	0.072	1.26255e-44	AD	ALDH3A2
CLASP2	1.0023e-48	0.802615	0.308	0.087	1.35581e-44	AD	CLASP2
MTMR3	1.20787e-48	1.79912	0.161	0.022	1.63389e-44	AD	MTMR3
ATP5MC3	1.21721e-48	0.875976	0.296	0.081	1.64651e-44	AD	ATP5MC3
LUC7L2	1.35072e-48	1.16353	0.23	0.051	1.82712e-44	AD	LUC7L2
FAM219A	1.50328e-48	1.44223	0.201	0.039	2.03349e-44	AD	FAM219A
ASH1L	1.58269e-48	1.55109	0.189	0.034	2.1409e-44	AD	ASH1L
ALKBH5	1.65384e-48	1.10514	0.232	0.052	2.23715e-44	AD	ALKBH5
NAP1L5	1.84153e-48	0.959532	0.309	0.089	2.49104e-44	AD	NAP1L5
GPR137	1.95954e-48	1.93863	0.154	0.02	2.65068e-44	AD	GPR137
MTFR1L	2.03121e-48	0.833493	0.318	0.093	2.74761e-44	AD	MTFR1L
ABI2	2.51305e-48	0.734283	0.358	0.112	3.39941e-44	AD	ABI2
FAM193B	2.70182e-48	0.565818	0.603	0.242	3.65475e-44	AD	FAM193B
CDH4	2.85569e-48	1.32773	0.202	0.039	3.86289e-44	AD	CDH4
RABEP1	2.95825e-48	1.18579	0.228	0.051	4.00163e-44	AD	RABEP1
AKAP8L	3.17625e-48	1.61926	0.185	0.032	4.29651e-44	AD	AKAP8L
TRIM9	3.22239e-48	0.578619	0.457	0.163	4.35893e-44	AD	TRIM9
USP46	4.7513e-48	2.66968	0.128	0.011	6.42708e-44	AD	USP46
SUGT1	5.12776e-48	1.17661	0.22	0.047	6.93632e-44	AD	SUGT1
CLK1	6.36022e-48	1.97158	0.165	0.024	8.60346e-44	AD	CLK1
EPRS	8.17546e-48	2.59364	0.129	0.012	1.10589e-43	AD	EPRS
KHSRP	8.28347e-48	1.13281	0.237	0.055	1.1205e-43	AD	KHSRP
VPS26B	8.89811e-48	0.920267	0.287	0.079	1.20365e-43	AD	VPS26B
BHLHE41	9.0065e-48	1.56018	0.196	0.038	1.21831e-43	AD	BHLHE41
ZDHHC8	1.21108e-47	1.45846	0.182	0.031	1.63822e-43	AD	ZDHHC8
IGFBP7	1.25212e-47	0.583903	0.516	0.196	1.69374e-43	AD	IGFBP7
SRSF1	1.30084e-47	2.78161	0.127	0.011	1.75965e-43	AD	SRSF1
GDF11	1.65864e-47	2.42005	0.13	0.012	2.24364e-43	AD	GDF11
FLII	1.9676e-47	1.62315	0.189	0.035	2.66157e-43	AD	FLII
STK11	2.32681e-47	2.06453	0.15	0.019	3.14748e-43	AD	STK11
BAG6	2.40296e-47	1.22522	0.215	0.046	3.25048e-43	AD	BAG6
PUM2	2.5113e-47	2.83925	0.122	0.009	3.39704e-43	AD	PUM2
FAM20C	2.65013e-47	1.02355	0.22	0.048	3.58483e-43	AD	FAM20C
AP2B1	2.96176e-47	0.615175	0.346	0.106	4.00638e-43	AD	AP2B1
CUTA	3.07591e-47	0.964785	0.274	0.073	4.16078e-43	AD	CUTA
MAP4K4	3.167e-47	0.660468	0.396	0.134	4.28401e-43	AD	MAP4K4
NIN	3.47061e-47	1.87365	0.154	0.021	4.69469e-43	AD	NIN
TNKS	4.23871e-47	3.06777	0.115	0.007	5.73371e-43	AD	TNKS
PDK2	5.48981e-47	1.03288	0.254	0.064	7.42606e-43	AD	PDK2
SPATA2	6.34036e-47	2.14586	0.133	0.013	8.5766e-43	AD	SPATA2
ATP13A2	6.41581e-47	3.50366	0.11	0.006	8.67866e-43	AD	ATP13A2
CLTB	6.9956e-47	1.12082	0.237	0.056	9.46295e-43	AD	CLTB
NISCH	7.46094e-47	0.510782	0.613	0.245	1.00924e-42	AD	NISCH
FASN	8.28237e-47	0.710977	0.315	0.094	1.12036e-42	AD	FASN
TMEM54	8.68611e-47	2.66996	0.121	0.009	1.17497e-42	AD	TMEM54
CTSF	8.76005e-47	0.648641	0.352	0.111	1.18497e-42	AD	CTSF
YAP1	9.01857e-47	0.962765	0.287	0.081	1.21994e-42	AD	YAP1
VPS451	1.29851e-46	0.710771	0.354	0.114	1.7565e-42	AD	VPS45
EXOSC6	1.51423e-46	3.32756	0.106	0.005	2.04831e-42	AD	EXOSC6
TMEM129	1.56491e-46	1.46705	0.177	0.03	2.11686e-42	AD	TMEM129
TMEM94	1.6598e-46	0.876254	0.211	0.045	2.24521e-42	AD	TMEM94
TUT4	2.0447e-46	2.51903	0.129	0.012	2.76587e-42	AD	TUT4
TUFM	2.30388e-46	1.29537	0.207	0.043	3.11646e-42	AD	TUFM
DYRK1A	2.3624e-46	2.29495	0.132	0.013	3.19562e-42	AD	DYRK1A
LRP4	2.89904e-46	0.503548	0.561	0.227	3.92154e-42	AD	LRP4
ST5	3.51817e-46	0.863754	0.251	0.064	4.75903e-42	AD	ST5
GRK2	3.56145e-46	2.27661	0.142	0.017	4.81758e-42	AD	GRK2
CDH2	3.91379e-46	1.03121	0.25	0.063	5.29418e-42	AD	CDH2
SAMD1	4.02512e-46	2.30204	0.135	0.015	5.44477e-42	AD	SAMD1
UBQLN1	4.05208e-46	0.608805	0.388	0.13	5.48124e-42	AD	UBQLN1
POU3F31	4.06806e-46	0.863562	0.237	0.057	5.50287e-42	AD	POU3F3
FBXW5	4.16963e-46	2.03357	0.146	0.019	5.64026e-42	AD	FBXW5
CAMK1	4.81394e-46	1.15518	0.231	0.055	6.51181e-42	AD	CAMK1
GIGYF2	5.51935e-46	1.59093	0.165	0.026	7.46602e-42	AD	GIGYF2
SET	5.59283e-46	0.633633	0.416	0.145	7.56542e-42	AD	SET
PIN1	5.66083e-46	0.612995	0.363	0.117	7.6574e-42	AD	PIN1
STAU2	5.87153e-46	0.92666	0.276	0.076	7.94242e-42	AD	STAU2
MERTK	6.20731e-46	1.07722	0.221	0.051	8.39662e-42	AD	MERTK
MAML2	6.57191e-46	0.974491	0.233	0.056	8.88982e-42	AD	MAML2
HNRNPH1	8.58114e-46	1.7922	0.158	0.023	1.16077e-41	AD	HNRNPH1
CCT3	8.6878e-46	0.685541	0.353	0.114	1.1752e-41	AD	CCT3
TRAK2	8.73961e-46	2.15703	0.14	0.016	1.18221e-41	AD	TRAK2
CREBL2	8.93149e-46	2.06202	0.144	0.018	1.20816e-41	AD	CREBL2
TLE1	9.18885e-46	1.35575	0.183	0.034	1.24298e-41	AD	TLE1
ZNF532	1.01174e-45	1.07175	0.237	0.058	1.36858e-41	AD	ZNF532
POMGNT2	1.09098e-45	1.7686	0.15	0.02	1.47576e-41	AD	POMGNT2
MXD4	1.09567e-45	1.11695	0.2	0.041	1.48211e-41	AD	MXD4
PGPEP1	1.11657e-45	2.09125	0.146	0.019	1.51038e-41	AD	PGPEP1
UBA2	1.20382e-45	1.20516	0.213	0.047	1.6284e-41	AD	UBA2
PPARA	1.24459e-45	1.74969	0.167	0.027	1.68355e-41	AD	PPARA
IK	1.29544e-45	1.81706	0.162	0.025	1.75234e-41	AD	IK
TADA3	1.53557e-45	0.916482	0.258	0.067	2.07716e-41	AD	TADA3
FXR2	1.63003e-45	1.82748	0.145	0.019	2.20495e-41	AD	FXR2
POM121C	1.82974e-45	2.18877	0.139	0.016	2.47509e-41	AD	POM121C
MAPKAPK3	1.84071e-45	2.46404	0.118	0.009	2.48993e-41	AD	MAPKAPK3
HPCAL4	1.93146e-45	0.622015	0.372	0.121	2.61269e-41	AD	HPCAL4
ZBTB44	2.05058e-45	2.72153	0.116	0.008	2.77382e-41	AD	ZBTB44
JDP2	2.37637e-45	0.853366	0.244	0.061	3.21452e-41	AD	JDP2
CRLF1	2.43948e-45	2.10143	0.144	0.019	3.29988e-41	AD	CRLF1
GRHPR	2.64613e-45	1.03116	0.249	0.064	3.57942e-41	AD	GRHPR
ST13	2.80402e-45	0.851687	0.338	0.109	3.79299e-41	AD	ST13
SENP61	3.16121e-45	0.80272	0.299	0.088	4.27616e-41	AD	SENP6
KLF9	3.38605e-45	1.56393	0.172	0.03	4.5803e-41	AD	KLF9
AMY2B	3.52419e-45	0.721158	0.35	0.114	4.76718e-41	AD	AMY2B
SAMD8	3.78166e-45	2.06599	0.145	0.019	5.11546e-41	AD	SAMD8
MAPKAPK2	3.90175e-45	1.90804	0.15	0.021	5.27789e-41	AD	MAPKAPK2
TTC141	3.99136e-45	1.04901	0.236	0.058	5.39912e-41	AD	TTC14
DOCK1	4.1748e-45	2.34198	0.129	0.013	5.64726e-41	AD	DOCK1
CACUL1	4.99585e-45	1.16244	0.242	0.062	6.75789e-41	AD	CACUL1
BAZ1B	5.17129e-45	1.09539	0.247	0.063	6.9952e-41	AD	BAZ1B
PI4KA	5.44354e-45	0.57907	0.482	0.182	7.36348e-41	AD	PI4KA
ZRANB2	5.69714e-45	0.699895	0.324	0.1	7.70652e-41	AD	ZRANB2
MAPRE1	7.47914e-45	1.00197	0.283	0.081	1.0117e-40	AD	MAPRE1
BSG	7.5506e-45	0.588084	0.803	0.365	1.02137e-40	AD	BSG
LYSMD2	8.28761e-45	2.75419	0.118	0.01	1.12107e-40	AD	LYSMD2
SNX33	8.68969e-45	2.97151	0.107	0.006	1.17545e-40	AD	SNX33
RBM6	8.81084e-45	1.02006	0.242	0.061	1.19184e-40	AD	RBM6
OBSL1	8.86556e-45	0.786369	0.341	0.112	1.19924e-40	AD	OBSL1
PANX2	9.77508e-45	3.12077	0.11	0.007	1.32227e-40	AD	PANX2
QRICH1	1.06565e-44	1.58686	0.171	0.03	1.44151e-40	AD	QRICH1
C3orf70	1.27498e-44	0.70998	0.299	0.089	1.72467e-40	AD	C3orf70
CDK5R1	1.39989e-44	3.17583	0.114	0.008	1.89363e-40	AD	CDK5R1
ZBTB16	1.40661e-44	2.43952	0.126	0.012	1.90273e-40	AD	ZBTB16
NACC1	1.502e-44	2.30536	0.126	0.012	2.03176e-40	AD	NACC1
ZMYND8	1.63215e-44	1.36108	0.198	0.042	2.2078e-40	AD	ZMYND8
CSNK1D	1.93006e-44	1.16247	0.211	0.047	2.61079e-40	AD	CSNK1D
DCAF7	1.95972e-44	1.4927	0.184	0.035	2.65091e-40	AD	DCAF7
C12orf49	1.96257e-44	0.736545	0.245	0.062	2.65477e-40	AD	C12orf49
ASRGL1	2.04653e-44	1.0198	0.228	0.055	2.76834e-40	AD	ASRGL1
PC	2.33729e-44	0.682516	0.292	0.086	3.16165e-40	AD	PC
IRS2	2.47588e-44	1.65952	0.152	0.023	3.34912e-40	AD	IRS2
KXD1	2.49356e-44	1.6592	0.17	0.03	3.37304e-40	AD	KXD1
LARP4	2.61149e-44	1.37121	0.202	0.044	3.53256e-40	AD	LARP4
DCAF8	2.83524e-44	1.08336	0.216	0.05	3.83522e-40	AD	DCAF8
ARF1	3.00372e-44	0.721159	0.316	0.097	4.06313e-40	AD	ARF1
AGPAT3	3.01711e-44	0.718526	0.362	0.123	4.08125e-40	AD	AGPAT3
CTNNA1	3.2263e-44	2.02098	0.14	0.018	4.36421e-40	AD	CTNNA1
LSS	4.40062e-44	1.67807	0.161	0.026	5.95272e-40	AD	LSS
RALY	4.538e-44	1.91818	0.14	0.018	6.13856e-40	AD	RALY
NKAIN4	4.66728e-44	0.638704	0.316	0.099	6.31342e-40	AD	NKAIN4
ZBTB7B	6.54363e-44	3.09648	0.105	0.006	8.85156e-40	AD	ZBTB7B
UBE4B	6.76159e-44	2.12666	0.133	0.016	9.1464e-40	AD	UBE4B
ARIH1	6.85985e-44	1.30697	0.202	0.044	9.27933e-40	AD	ARIH1
C1orf122	7.06505e-44	0.431577	0.508	0.193	9.55689e-40	AD	C1orf122
TNKS2	7.1072e-44	1.97884	0.141	0.019	9.61391e-40	AD	TNKS2
PLEKHO1	7.4094e-44	0.721842	0.266	0.073	1.00227e-39	AD	PLEKHO1
CTXND1	7.62085e-44	1.95271	0.138	0.017	1.03087e-39	AD	CTXND1
IGIP	8.21348e-44	1.47883	0.167	0.029	1.11104e-39	AD	IGIP
RAD23A	8.6405e-44	1.63534	0.172	0.031	1.1688e-39	AD	RAD23A
TCAF1	9.03697e-44	1.56448	0.17	0.03	1.22243e-39	AD	TCAF1
PPP1R12A	9.34638e-44	1.1823	0.209	0.047	1.26429e-39	AD	PPP1R12A
DTX3	9.45456e-44	0.464647	0.51	0.199	1.27892e-39	AD	DTX3
BBX	1.00205e-43	1.24121	0.195	0.041	1.35547e-39	AD	BBX
FGD6	1.16042e-43	1.10553	0.184	0.036	1.56969e-39	AD	FGD6
FXYD7	1.17475e-43	2.1712	0.135	0.016	1.58909e-39	AD	FXYD7
DGKB	1.25602e-43	0.68794	0.331	0.105	1.69902e-39	AD	DGKB
AGO1	1.62199e-43	2.7577	0.112	0.008	2.19406e-39	AD	AGO1
VPS53	1.63017e-43	0.623358	0.375	0.13	2.20513e-39	AD	VPS53
MFN2	1.83885e-43	1.84048	0.152	0.023	2.48742e-39	AD	MFN2
SSU72	1.97148e-43	1.67626	0.163	0.027	2.66683e-39	AD	SSU72
SCRIB	2.52306e-43	0.880686	0.203	0.045	3.41294e-39	AD	SCRIB
SAR1A	3.0147e-43	1.67633	0.157	0.025	4.07798e-39	AD	SAR1A
KCND3	3.30861e-43	2.26258	0.127	0.014	4.47556e-39	AD	KCND3
HSF4	3.54893e-43	0.830259	0.254	0.069	4.80064e-39	AD	HSF4
ARHGDIG	4.08183e-43	2.31525	0.13	0.015	5.5215e-39	AD	ARHGDIG
LDB1	4.33755e-43	1.1821	0.201	0.044	5.86741e-39	AD	LDB1
EIF3A	4.35467e-43	0.64632	0.431	0.162	5.89056e-39	AD	EIF3A
MCF2L2	4.97661e-43	2.0023	0.134	0.016	6.73186e-39	AD	MCF2L2
FBXL19	5.08783e-43	3.65094	0.098	0.004	6.8823e-39	AD	FBXL19
NME4	5.13011e-43	2.44706	0.117	0.011	6.9395e-39	AD	NME4
STRAP	5.98814e-43	1.02896	0.241	0.063	8.10016e-39	AD	STRAP
EIF3K	6.57134e-43	0.498984	0.404	0.143	8.88905e-39	AD	EIF3K
UBE2D2	7.228e-43	0.710933	0.358	0.121	9.77732e-39	AD	UBE2D2
ABHD12	7.93224e-43	0.996191	0.238	0.061	1.07299e-38	AD	ABHD12
GRIA2	8.08943e-43	1.0542	0.23	0.058	1.09426e-38	AD	GRIA2
TBC1D1	8.23273e-43	1.74926	0.152	0.023	1.11364e-38	AD	TBC1D1
STARD3	9.81855e-43	0.543348	0.353	0.12	1.32816e-38	AD	STARD3
TSC22D4	1.06641e-42	1.15144	0.18	0.035	1.44253e-38	AD	TSC22D4
SUPT5H	1.12372e-42	0.46059	0.5	0.196	1.52005e-38	AD	SUPT5H
VTI1A	1.2022e-42	2.39681	0.123	0.013	1.62622e-38	AD	VTI1A
NSD2	1.2123e-42	1.44438	0.177	0.034	1.63988e-38	AD	NSD2
RAB11FIP4	1.8274e-42	1.06341	0.218	0.053	2.47193e-38	AD	RAB11FIP4
MIB2	1.83616e-42	0.906773	0.257	0.072	2.48378e-38	AD	MIB2
BDP1	2.05559e-42	2.46332	0.121	0.012	2.7806e-38	AD	BDP1
PHLDB1	2.24423e-42	2.64972	0.108	0.008	3.03577e-38	AD	PHLDB1
VSIR	2.38397e-42	1.46109	0.178	0.035	3.22479e-38	AD	VSIR
GNAZ	2.85047e-42	2.22099	0.126	0.014	3.85583e-38	AD	GNAZ
SELENOM	2.96761e-42	2.53454	0.118	0.012	4.01428e-38	AD	SELENOM
SF3B2	3.09027e-42	0.803812	0.255	0.07	4.18021e-38	AD	SF3B2
PLCB1	3.39537e-42	2.43073	0.122	0.013	4.59292e-38	AD	PLCB1
CAMK1D	3.95174e-42	1.01567	0.239	0.063	5.34552e-38	AD	CAMK1D
BAIAP2	3.97978e-42	0.766435	0.319	0.104	5.38344e-38	AD	BAIAP2
SLC35C2	4.05068e-42	0.863134	0.188	0.039	5.47935e-38	AD	SLC35C2
MLEC	4.07708e-42	2.47045	0.116	0.011	5.51507e-38	AD	MLEC
PRKCA1	4.57609e-42	0.374592	0.34	0.112	6.19007e-38	AD	PRKCA
SSPN	5.50171e-42	1.28675	0.2	0.046	7.44217e-38	AD	SSPN
PER1	6.40943e-42	2.45488	0.116	0.011	8.67004e-38	AD	PER1
SLC48A1	6.47509e-42	0.529845	0.397	0.144	8.75885e-38	AD	SLC48A1
SCP2	7.62623e-42	0.641	0.394	0.144	1.0316e-37	AD	SCP2
ZER1	7.92069e-42	1.40894	0.163	0.029	1.07143e-37	AD	ZER1
SPEG	8.23392e-42	0.457546	0.412	0.152	1.1138e-37	AD	SPEG
C7orf50	9.00212e-42	1.77732	0.152	0.025	1.21772e-37	AD	C7orf50
NYAP11	9.27335e-42	0.358993	0.51	0.202	1.25441e-37	AD	NYAP1
EXOC6B	9.41438e-42	2.19364	0.125	0.014	1.27348e-37	AD	EXOC6B
GOLM1	1.12743e-41	0.727872	0.373	0.132	1.52507e-37	AD	GOLM1
GIPC1	1.17711e-41	1.75114	0.154	0.026	1.59227e-37	AD	GIPC1
IDH2	1.3906e-41	0.352113	0.551	0.229	1.88107e-37	AD	IDH2
MED13L	1.61035e-41	1.60387	0.159	0.028	2.17832e-37	AD	MED13L
NEK7	1.61353e-41	3.24317	0.098	0.005	2.18262e-37	AD	NEK7
HSD17B14	1.6292e-41	0.746611	0.268	0.078	2.20382e-37	AD	HSD17B14
CLTC	1.73694e-41	0.547409	0.402	0.145	2.34956e-37	AD	CLTC
MBD1	1.81631e-41	1.84501	0.145	0.022	2.45692e-37	AD	MBD1
TCEA2	2.13961e-41	1.86616	0.141	0.021	2.89425e-37	AD	TCEA2
ACTR1B	2.27289e-41	0.699563	0.311	0.1	3.07454e-37	AD	ACTR1B
USP34	4.07353e-41	1.34952	0.177	0.036	5.51026e-37	AD	USP34
LMO4	4.20631e-41	0.58889	0.343	0.115	5.68987e-37	AD	LMO4
NDUFA10	4.46879e-41	1.00919	0.223	0.056	6.04493e-37	AD	NDUFA10
LSM14A	5.15026e-41	1.482	0.164	0.03	6.96676e-37	AD	LSM14A
RNF40	5.21906e-41	1.16054	0.191	0.042	7.05982e-37	AD	RNF40
FLOT1	5.46876e-41	0.482519	0.398	0.144	7.39759e-37	AD	FLOT1
CHMP4B	5.84099e-41	0.455999	0.458	0.176	7.90111e-37	AD	CHMP4B
GLYR1	6.50375e-41	0.51162	0.377	0.134	8.79762e-37	AD	GLYR1
RAB10	6.85148e-41	0.994065	0.231	0.061	9.26799e-37	AD	RAB10
AHI1	7.26861e-41	1.81743	0.136	0.019	9.83225e-37	AD	AHI1
DDT	7.70794e-41	2.06917	0.123	0.014	1.04265e-36	AD	DDT
ABLIM3	7.83173e-41	2.15117	0.127	0.016	1.0594e-36	AD	ABLIM3
HES6	8.1598e-41	1.11392	0.184	0.039	1.10378e-36	AD	HES6
BCL7C	8.42199e-41	1.06175	0.19	0.042	1.13924e-36	AD	BCL7C
CCDC88B	1.34563e-40	2.10833	0.116	0.012	1.82023e-36	AD	CCDC88B
BRD4	1.47158e-40	1.56744	0.149	0.024	1.9906e-36	AD	BRD4
RAB5B	1.4924e-40	0.487336	0.435	0.164	2.01876e-36	AD	RAB5B
PRKCSH	1.78979e-40	1.6489	0.151	0.025	2.42105e-36	AD	PRKCSH
SCARB2	1.85953e-40	1.10855	0.208	0.051	2.51539e-36	AD	SCARB2
STK25	2.11848e-40	1.91138	0.126	0.016	2.86566e-36	AD	STK25
KIAA0232	2.80399e-40	1.48491	0.17	0.034	3.79296e-36	AD	KIAA0232
SMARCA4	3.2299e-40	1.76122	0.137	0.02	4.36909e-36	AD	SMARCA4
PLRG1	3.34034e-40	1.77339	0.142	0.022	4.51847e-36	AD	PLRG1
MAVS	3.35751e-40	2.37335	0.116	0.012	4.5417e-36	AD	MAVS
CLIP2	3.38415e-40	1.41857	0.155	0.027	4.57775e-36	AD	CLIP2
FAM8A1	3.53602e-40	3.35494	0.092	0.004	4.78317e-36	AD	FAM8A1
NPEPPS	3.78816e-40	0.9876	0.223	0.058	5.12424e-36	AD	NPEPPS
KIF21B	4.01786e-40	2.18195	0.116	0.012	5.43495e-36	AD	KIF21B
C16orf58	4.07952e-40	1.04046	0.195	0.045	5.51836e-36	AD	C16orf58
CALCOCO2	4.09353e-40	1.59286	0.154	0.027	5.53732e-36	AD	CALCOCO2
TRIM41	4.16129e-40	0.810181	0.248	0.07	5.62898e-36	AD	TRIM41
SYT17	4.187e-40	0.266845	0.451	0.173	5.66375e-36	AD	SYT17
DDN	4.98114e-40	6.69184	0.078	0	6.73798e-36	AD	DDN
CSDE1	5.07644e-40	1.9252	0.128	0.017	6.8669e-36	AD	CSDE1
DBNDD1	6.15271e-40	2.13264	0.117	0.013	8.32277e-36	AD	DBNDD1
RIDA	6.36404e-40	0.404534	0.506	0.205	8.60864e-36	AD	RIDA
CLIP3	6.58131e-40	0.923471	0.241	0.067	8.90254e-36	AD	CLIP3
HDAC5	7.90337e-40	1.93922	0.131	0.018	1.06909e-35	AD	HDAC5
ATP5F1D	8.03483e-40	0.456258	0.495	0.198	1.08687e-35	AD	ATP5F1D
LAMTOR4	8.26439e-40	0.659313	0.334	0.113	1.11792e-35	AD	LAMTOR4
MPHOSPH8	8.40941e-40	2.16675	0.118	0.013	1.13754e-35	AD	MPHOSPH8
ZBTB18	1.00551e-39	0.530952	0.409	0.154	1.36015e-35	AD	ZBTB18
FGFR1	1.03582e-39	1.16492	0.181	0.039	1.40116e-35	AD	FGFR1
UPF1	1.25605e-39	3.74249	0.09	0.004	1.69906e-35	AD	UPF1
SDCBP	1.30596e-39	2.70498	0.109	0.01	1.76657e-35	AD	SDCBP
RUBCN	1.39315e-39	2.27049	0.113	0.012	1.88451e-35	AD	RUBCN
RYR1	1.44324e-39	1.48182	0.153	0.027	1.95227e-35	AD	RYR1
GPSM1	1.48577e-39	0.914661	0.195	0.046	2.0098e-35	AD	GPSM1
SGTA	1.58599e-39	1.07085	0.194	0.045	2.14537e-35	AD	SGTA
RXRA	1.69444e-39	0.258381	0.531	0.219	2.29207e-35	AD	RXRA
PRPF40A	1.75385e-39	2.44587	0.11	0.011	2.37243e-35	AD	PRPF40A
MTOR	1.80845e-39	3.4977	0.092	0.005	2.44629e-35	AD	MTOR
NAV2	1.90001e-39	0.896698	0.215	0.055	2.57014e-35	AD	NAV2
ZC3H12C	2.09424e-39	0.718468	0.223	0.059	2.83288e-35	AD	ZC3H12C
CELF1	2.10587e-39	0.559195	0.417	0.16	2.8486e-35	AD	CELF1
TAF10	2.12793e-39	1.84132	0.128	0.017	2.87845e-35	AD	TAF10
RAB14	2.14004e-39	0.966723	0.232	0.063	2.89484e-35	AD	RAB14
SLC2A4RG	2.15892e-39	1.31782	0.139	0.021	2.92037e-35	AD	SLC2A4RG
ILF3	2.78432e-39	0.625801	0.362	0.131	3.76636e-35	AD	ILF3
KCTD17	2.79861e-39	1.83057	0.13	0.018	3.78568e-35	AD	KCTD17
IL6ST	2.82122e-39	0.539662	0.377	0.136	3.81626e-35	AD	IL6ST
FOXG1	2.82544e-39	0.477133	0.325	0.11	3.82198e-35	AD	FOXG1
PDE7B	2.85699e-39	1.15487	0.161	0.031	3.86466e-35	AD	PDE7B
GPC1	2.89628e-39	0.452886	0.392	0.145	3.9178e-35	AD	GPC1
TAOK1	2.9162e-39	0.632503	0.34	0.118	3.94475e-35	AD	TAOK1
IP6K1	3.036e-39	1.96741	0.114	0.012	4.1068e-35	AD	IP6K1
PLD2	3.10767e-39	2.12153	0.119	0.014	4.20375e-35	AD	PLD2
SMAD9	3.49842e-39	1.89355	0.139	0.022	4.73232e-35	AD	SMAD9
NFE2L1	3.52035e-39	0.479745	0.653	0.288	4.76198e-35	AD	NFE2L1
BAD	3.59552e-39	1.8798	0.137	0.021	4.86367e-35	AD	BAD
PDCD6IP	3.65677e-39	2.27681	0.119	0.014	4.94651e-35	AD	PDCD6IP
KIAA0513	3.8614e-39	1.91608	0.132	0.019	5.22332e-35	AD	KIAA0513
WBP1L	3.98171e-39	2.81741	0.099	0.007	5.38606e-35	AD	WBP1L
CLEC16A	4.00171e-39	0.678394	0.226	0.061	5.41311e-35	AD	CLEC16A
PPP2R2C	4.01837e-39	0.518854	0.39	0.142	5.43565e-35	AD	PPP2R2C
KMT2A	4.0313e-39	2.56173	0.099	0.007	5.45314e-35	AD	KMT2A
OTUD7B	4.13058e-39	0.979123	0.192	0.045	5.58743e-35	AD	OTUD7B
PLCE1	4.34428e-39	0.98469	0.256	0.077	5.8765e-35	AD	PLCE1
MAPK9	4.40988e-39	2.57843	0.109	0.011	5.96525e-35	AD	MAPK9
GRK3	4.42158e-39	0.908725	0.247	0.071	5.98107e-35	AD	GRK3
ZHX2	4.81366e-39	0.928266	0.189	0.043	6.51143e-35	AD	ZHX2
SNAPC31	5.09333e-39	1.19136	0.187	0.043	6.88974e-35	AD	SNAPC3
ZNF846	5.09646e-39	2.66225	0.103	0.008	6.89398e-35	AD	ZNF846
PIK3IP1	5.32995e-39	1.39278	0.159	0.03	7.20982e-35	AD	PIK3IP1
SDR39U1	5.93471e-39	2.2882	0.105	0.009	8.02788e-35	AD	SDR39U1
PCBP4	6.08001e-39	1.58881	0.139	0.022	8.22443e-35	AD	PCBP4
WASF2	6.216e-39	1.0038	0.212	0.054	8.40839e-35	AD	WASF2
FGFRL1	6.44137e-39	0.4179	0.474	0.189	8.71324e-35	AD	FGFRL1
ZMIZ1	7.02866e-39	0.7479	0.246	0.071	9.50767e-35	AD	ZMIZ1
CALCOCO1	7.7775e-39	1.42094	0.163	0.032	1.05206e-34	AD	CALCOCO1
GYS1	8.72298e-39	1.62017	0.129	0.018	1.17996e-34	AD	GYS1
PCDH17	9.33026e-39	2.66722	0.101	0.008	1.2621e-34	AD	PCDH17
DHX30	9.37019e-39	1.51159	0.16	0.031	1.26751e-34	AD	DHX30
SPTBN4	9.69965e-39	0.550411	0.361	0.129	1.31207e-34	AD	SPTBN4
EIF4G1	1.06575e-38	0.41139	0.492	0.196	1.44164e-34	AD	EIF4G1
SH3GLB1	1.0878e-38	1.52581	0.155	0.029	1.47147e-34	AD	SH3GLB1
HAGHL	1.12919e-38	1.1872	0.187	0.043	1.52745e-34	AD	HAGHL
TAPBP	1.17265e-38	1.5987	0.152	0.028	1.58624e-34	AD	TAPBP
TRPS1	1.27386e-38	0.42658	0.577	0.251	1.72315e-34	AD	TRPS1
MYH10	1.38445e-38	2.67122	0.104	0.009	1.87274e-34	AD	MYH10
PPP1CB	1.52328e-38	0.657113	0.303	0.099	2.06054e-34	AD	PPP1CB
ATP2B1	1.53023e-38	2.63323	0.108	0.011	2.06994e-34	AD	ATP2B1
SMARCA2	1.62426e-38	0.769367	0.262	0.08	2.19714e-34	AD	SMARCA2
FIS1	1.81173e-38	2.40463	0.108	0.011	2.45073e-34	AD	FIS1
HTT	2.21344e-38	1.27691	0.162	0.032	2.99413e-34	AD	HTT
DBNL	2.46754e-38	2.26136	0.113	0.012	3.33785e-34	AD	DBNL
KAT6B	2.52901e-38	0.486993	0.596	0.262	3.42099e-34	AD	KAT6B
ARHGEF7	2.64886e-38	1.16737	0.179	0.04	3.58312e-34	AD	ARHGEF7
WSB1	2.89225e-38	2.0972	0.126	0.017	3.91235e-34	AD	WSB1
NFAT5	2.96979e-38	0.55879	0.374	0.14	4.01724e-34	AD	NFAT5
GTF3C1	3.15189e-38	0.757484	0.256	0.077	4.26356e-34	AD	GTF3C1
CASTOR2	3.20108e-38	1.79427	0.127	0.018	4.3301e-34	AD	CASTOR2
PAQR6	3.31125e-38	0.574496	0.782	0.442	4.47912e-34	AD	PAQR6
CYHR1	3.75009e-38	0.85643	0.212	0.055	5.07275e-34	AD	CYHR1
RASSF4	4.20201e-38	0.618569	0.384	0.147	5.68406e-34	AD	RASSF4
TEAD1	4.36213e-38	1.5272	0.161	0.032	5.90066e-34	AD	TEAD1
TNRC6B	4.43567e-38	1.15131	0.187	0.043	6.00013e-34	AD	TNRC6B
DEF8	4.55115e-38	0.852847	0.238	0.068	6.15634e-34	AD	DEF8
ITSN1	4.58425e-38	0.596832	0.266	0.082	6.20111e-34	AD	ITSN1
NDUFS1	4.97492e-38	0.998798	0.21	0.055	6.72958e-34	AD	NDUFS1
TGOLN2	5.27232e-38	0.978445	0.201	0.051	7.13187e-34	AD	TGOLN2
UNC80	5.49939e-38	3.00217	0.092	0.006	7.43902e-34	AD	UNC80
PSMB4	5.69215e-38	0.733092	0.283	0.091	7.69978e-34	AD	PSMB4
SEC23A	5.8236e-38	1.5381	0.16	0.032	7.87758e-34	AD	SEC23A
DDX61	5.97222e-38	0.456304	0.367	0.132	8.07862e-34	AD	DDX6
ZHX3	6.06399e-38	0.291227	0.52	0.215	8.20275e-34	AD	ZHX3
RNF11	6.23593e-38	0.348289	0.486	0.192	8.43535e-34	AD	RNF11
KIAA1109	6.35803e-38	1.46422	0.147	0.026	8.60051e-34	AD	KIAA1109
TEX2	6.44583e-38	0.801421	0.247	0.073	8.71928e-34	AD	TEX2
PYGB	6.52686e-38	0.395669	0.565	0.245	8.82888e-34	AD	PYGB
SPAG161	6.82958e-38	0.949833	0.212	0.055	9.23837e-34	AD	SPAG16
CCDC301	7.33084e-38	1.02794	0.224	0.062	9.91643e-34	AD	CCDC30
ICA1L	7.76629e-38	0.701482	0.339	0.122	1.05055e-33	AD	ICA1L
MYORG	8.18618e-38	1.55926	0.12	0.016	1.10734e-33	AD	MYORG
ANKRD13D	8.40747e-38	2.41375	0.099	0.008	1.13728e-33	AD	ANKRD13D
PLEKHO2	8.94754e-38	0.768093	0.287	0.095	1.21033e-33	AD	PLEKHO2
FUT10	9.03391e-38	1.26908	0.18	0.041	1.22202e-33	AD	FUT10
SYNPO2	9.12643e-38	0.495607	0.409	0.157	1.23453e-33	AD	SYNPO2
LINGO11	9.33202e-38	1.18089	0.177	0.039	1.26234e-33	AD	LINGO1
RUSC2	1.01238e-37	2.67573	0.103	0.009	1.36945e-33	AD	RUSC2
THNSL2	1.02265e-37	0.992228	0.154	0.029	1.38334e-33	AD	THNSL2
CCDC92	1.0238e-37	0.500465	0.277	0.087	1.38489e-33	AD	CCDC92
U2AF2	1.0752e-37	1.21644	0.177	0.04	1.45443e-33	AD	U2AF2
DEK1	1.15091e-37	0.616914	0.299	0.099	1.55683e-33	AD	DEK
RFX3	1.34704e-37	0.961665	0.228	0.064	1.82214e-33	AD	RFX3
HIST2H2AB	1.44876e-37	2.51445	0.1	0.008	1.95974e-33	AD	HIST2H2AB
LRCH4	1.44986e-37	0.801506	0.199	0.05	1.96123e-33	AD	LRCH4
FASTK	1.46462e-37	2.28962	0.115	0.014	1.98119e-33	AD	FASTK
PIK3C3	1.4816e-37	2.20128	0.115	0.014	2.00416e-33	AD	PIK3C3
MAML1	1.50847e-37	2.3557	0.104	0.01	2.04051e-33	AD	MAML1
ST8SIA1	1.52012e-37	0.972992	0.213	0.057	2.05627e-33	AD	ST8SIA1
CDC34	1.53576e-37	2.29599	0.106	0.011	2.07743e-33	AD	CDC34
THOP1	1.53843e-37	1.39003	0.137	0.022	2.08103e-33	AD	THOP1
ALDH5A1	1.58722e-37	0.889685	0.222	0.061	2.14703e-33	AD	ALDH5A1
EXOSC10	1.59095e-37	1.58011	0.153	0.03	2.15208e-33	AD	EXOSC10
ANKS1B	1.83036e-37	2.81726	0.101	0.009	2.47593e-33	AD	ANKS1B
APBA1	2.21195e-37	1.67428	0.134	0.021	2.99211e-33	AD	APBA1
FKBP5	2.22489e-37	1.17484	0.189	0.045	3.00961e-33	AD	FKBP5
BCL2L21	2.47481e-37	0.434831	0.43	0.169	3.34768e-33	AD	BCL2L2
KLHL21	2.54685e-37	0.215824	0.32	0.11	3.44513e-33	AD	KLHL21
LRFN4	2.60034e-37	1.26957	0.148	0.027	3.51748e-33	AD	LRFN4
ANKH	3.57602e-37	3.34327	0.088	0.005	4.83729e-33	AD	ANKH
MYO6	3.58798e-37	1.17787	0.183	0.043	4.85346e-33	AD	MYO6
STARD7	3.73647e-37	1.26044	0.177	0.04	5.05432e-33	AD	STARD7
MAX	4.37502e-37	0.808468	0.273	0.087	5.9181e-33	AD	MAX
PPP1R7	5.21022e-37	1.17763	0.182	0.043	7.04787e-33	AD	PPP1R7
HHIPL1	5.29853e-37	0.88522	0.223	0.062	7.16732e-33	AD	HHIPL1
TSN	5.32932e-37	1.50698	0.145	0.026	7.20897e-33	AD	TSN
MKNK2	5.38652e-37	1.49166	0.14	0.024	7.28635e-33	AD	MKNK2
PADI2	5.58493e-37	0.363127	0.537	0.229	7.55474e-33	AD	PADI2
SNX21	5.85119e-37	0.469775	0.261	0.081	7.91491e-33	AD	SNX21
CIZ1	6.33969e-37	2.76548	0.097	0.008	8.5757e-33	AD	CIZ1
CYTH2	6.92657e-37	1.82237	0.124	0.018	9.36957e-33	AD	CYTH2
PI4KB	7.9387e-37	1.51538	0.151	0.029	1.07387e-32	AD	PI4KB
NDUFA31	8.02063e-37	0.646124	0.281	0.09	1.08495e-32	AD	NDUFA3
PAGR1	8.07408e-37	2.64052	0.104	0.011	1.09218e-32	AD	PAGR1
UBFD1	8.07832e-37	1.52261	0.14	0.024	1.09275e-32	AD	UBFD1
KDM3B	8.2748e-37	1.856	0.119	0.016	1.11933e-32	AD	KDM3B
SAP18	9.10246e-37	0.682549	0.321	0.113	1.23129e-32	AD	SAP18
FXR1	1.01129e-36	0.721734	0.238	0.07	1.36798e-32	AD	FXR1
FAM168B	1.08432e-36	1.2525	0.168	0.037	1.46675e-32	AD	FAM168B
MRNIP	1.14904e-36	1.18037	0.194	0.049	1.55431e-32	AD	MRNIP
SPRED1	1.26314e-36	1.15732	0.165	0.035	1.70865e-32	AD	SPRED1
RHOBTB2	1.29771e-36	1.11944	0.168	0.037	1.75541e-32	AD	RHOBTB2
ZCRB1	1.37437e-36	0.661653	0.296	0.1	1.8591e-32	AD	ZCRB1
SSR1	1.75109e-36	0.862359	0.216	0.059	2.3687e-32	AD	SSR1
UQCR11	1.81617e-36	2.29211	0.106	0.012	2.45674e-32	AD	UQCR11
TRIP12	1.83198e-36	1.60193	0.133	0.022	2.47812e-32	AD	TRIP12
CCT2	1.83657e-36	1.22721	0.172	0.039	2.48433e-32	AD	CCT2
AURKAIP1	1.83793e-36	0.974903	0.214	0.059	2.48617e-32	AD	AURKAIP1
VPS28	1.90799e-36	1.28149	0.158	0.032	2.58094e-32	AD	VPS28
CREBZF	1.92323e-36	1.13167	0.182	0.043	2.60155e-32	AD	CREBZF
SZRD1	2.00799e-36	2.78479	0.096	0.008	2.71621e-32	AD	SZRD1
APBA2	2.14001e-36	0.465034	0.415	0.161	2.89479e-32	AD	APBA2
BEGAIN	2.4633e-36	2.44019	0.1	0.009	3.33211e-32	AD	BEGAIN
SOD3	2.46586e-36	1.09094	0.151	0.029	3.33557e-32	AD	SOD3
C4orf3	2.47242e-36	0.605972	0.294	0.098	3.34444e-32	AD	C4orf3
MTPN	2.68457e-36	0.463832	0.442	0.177	3.63142e-32	AD	MTPN
RNF44	2.94591e-36	2.2389	0.1	0.009	3.98493e-32	AD	RNF44
GLRX	3.13907e-36	1.50465	0.147	0.028	4.24623e-32	AD	GLRX
MYL6B	3.20116e-36	0.525905	0.338	0.123	4.33021e-32	AD	MYL6B
VEZT	3.60592e-36	1.65363	0.132	0.022	4.87772e-32	AD	VEZT
HPSE2	4.17102e-36	0.554208	0.247	0.076	5.64214e-32	AD	HPSE2
MGLL	4.22438e-36	2.38959	0.101	0.01	5.71432e-32	AD	MGLL
CTIF	4.23723e-36	0.542912	0.299	0.102	5.7317e-32	AD	CTIF
UBXN6	4.26837e-36	0.337328	0.588	0.251	5.77382e-32	AD	UBXN6
PKD1	4.41792e-36	0.355794	0.612	0.27	5.97612e-32	AD	PKD1
BRD2	4.7451e-36	0.546073	0.311	0.108	6.4187e-32	AD	BRD2
ACSM5	5.1761e-36	2.24519	0.105	0.012	7.00171e-32	AD	ACSM5
CSDC2	5.26813e-36	0.490319	0.352	0.13	7.1262e-32	AD	CSDC2
ILKAP	5.37837e-36	0.933723	0.228	0.066	7.27532e-32	AD	ILKAP
KCNA2	5.42402e-36	0.344893	0.274	0.088	7.33707e-32	AD	KCNA2
SHISA41	5.74725e-36	0.455389	0.353	0.129	7.77431e-32	AD	SHISA4
RETREG2	6.02882e-36	2.69111	0.095	0.008	8.15519e-32	AD	RETREG2
SOS2	6.40023e-36	2.28838	0.105	0.012	8.65759e-32	AD	SOS2
PLEKHB21	6.50628e-36	0.983537	0.194	0.049	8.80105e-32	AD	PLEKHB2
WDR60	6.61491e-36	2.83059	0.092	0.007	8.94799e-32	AD	WDR60
ARRB1	7.56719e-36	0.358208	0.364	0.136	1.02361e-31	AD	ARRB1
SUMO3	8.7238e-36	1.28644	0.167	0.037	1.18007e-31	AD	SUMO3
PRPF6	9.04874e-36	0.905018	0.226	0.066	1.22402e-31	AD	PRPF6
BCL2L13	9.96255e-36	0.492277	0.332	0.12	1.34763e-31	AD	BCL2L13
RNF141	1.0035e-35	0.948773	0.221	0.063	1.35744e-31	AD	RNF141
HTRA11	1.02251e-35	0.41633	0.566	0.243	1.38314e-31	AD	HTRA1
ACADM	1.03084e-35	0.928725	0.208	0.056	1.39441e-31	AD	ACADM
DENND5A	1.05683e-35	3.06405	0.085	0.005	1.42957e-31	AD	DENND5A
TMEM33	1.22122e-35	2.29291	0.1	0.01	1.65195e-31	AD	TMEM33
HIP1R	1.22914e-35	2.32264	0.1	0.01	1.66265e-31	AD	HIP1R
KIFC2	1.23126e-35	0.412422	0.336	0.122	1.66553e-31	AD	KIFC2
VCAN	1.23541e-35	1.33143	0.168	0.038	1.67114e-31	AD	VCAN
SMARCC1	1.27952e-35	1.83983	0.116	0.016	1.7308e-31	AD	SMARCC1
SF3B1	1.33894e-35	0.676009	0.278	0.092	1.81118e-31	AD	SF3B1
NME3	1.36015e-35	1.93121	0.112	0.014	1.83988e-31	AD	NME3
CCDC82	1.38745e-35	1.58985	0.126	0.02	1.87681e-31	AD	CCDC82
GID8	1.69626e-35	1.98342	0.116	0.016	2.29453e-31	AD	GID8
TPM1	1.75593e-35	1.06771	0.188	0.047	2.37525e-31	AD	TPM1
SUGP2	1.8422e-35	1.45536	0.133	0.023	2.49195e-31	AD	SUGP2
EFHD1	1.84235e-35	0.385366	0.582	0.257	2.49215e-31	AD	EFHD1
P4HB	1.99163e-35	2.05113	0.114	0.015	2.69408e-31	AD	P4HB
ARPC2	2.18799e-35	0.59746	0.333	0.121	2.95969e-31	AD	ARPC2
CHTOP	2.40645e-35	0.850327	0.218	0.062	3.2552e-31	AD	CHTOP
METTL7B1	2.43197e-35	0.536132	0.298	0.104	3.28973e-31	AD	METTL7B
METAP2	2.52314e-35	1.6465	0.13	0.022	3.41305e-31	AD	METAP2
FRS2	2.57604e-35	1.06219	0.201	0.054	3.48461e-31	AD	FRS2
ADGRL1	2.58007e-35	5.39397	0.07	0.001	3.49006e-31	AD	ADGRL1
SNX19	2.6552e-35	0.838768	0.221	0.064	3.59169e-31	AD	SNX19
TGFB3	2.82164e-35	2.16867	0.103	0.011	3.81683e-31	AD	TGFB3
CMTM4	2.94292e-35	0.407012	0.408	0.162	3.98089e-31	AD	CMTM4
ARHGAP21	3.12323e-35	0.463788	0.368	0.14	4.22479e-31	AD	ARHGAP21
PIP5K1C	3.197e-35	9.19332	0.067	0	4.32459e-31	AD	PIP5K1C
SMAD2	3.2272e-35	1.27107	0.16	0.035	4.36543e-31	AD	SMAD2
TRIM44	3.42987e-35	0.64523	0.254	0.08	4.63958e-31	AD	TRIM44
FAM118A	3.47907e-35	4.2032	0.075	0.002	4.70614e-31	AD	FAM118A
ALAD1	3.50181e-35	0.317938	0.399	0.156	4.73689e-31	AD	ALAD
IFRD1	3.50525e-35	1.33945	0.155	0.033	4.74155e-31	AD	IFRD1
PFDN1	3.53147e-35	1.30508	0.138	0.025	4.77702e-31	AD	PFDN1
PHLPP1	3.82832e-35	1.01547	0.167	0.038	5.17856e-31	AD	PHLPP1
CAMLG	3.8299e-35	1.4062	0.15	0.03	5.1807e-31	AD	CAMLG
PRMT2	4.09046e-35	0.922205	0.213	0.06	5.53316e-31	AD	PRMT2
NSD1	4.5824e-35	1.98528	0.112	0.015	6.19861e-31	AD	NSD1
GSTM3	4.60415e-35	0.458649	0.418	0.17	6.22804e-31	AD	GSTM3
LRRC37A2	5.30002e-35	3.85728	0.078	0.003	7.16933e-31	AD	LRRC37A2
ICAM5	5.35749e-35	2.96738	0.088	0.006	7.24708e-31	AD	ICAM5
DDX41	5.43371e-35	1.13264	0.165	0.037	7.35018e-31	AD	DDX41
ZBTB20	5.49541e-35	0.358853	0.575	0.254	7.43364e-31	AD	ZBTB20
BET1L	5.57533e-35	1.60199	0.136	0.024	7.54175e-31	AD	BET1L
TAF6	5.7551e-35	2.2552	0.101	0.011	7.78493e-31	AD	TAF6
SLC23A2	5.76819e-35	1.71909	0.13	0.022	7.80263e-31	AD	SLC23A2
NEK6	5.95957e-35	0.515268	0.415	0.17	8.06151e-31	AD	NEK6
RMDN3	6.05357e-35	1.24512	0.154	0.032	8.18867e-31	AD	RMDN3
PCM1	6.38142e-35	0.439036	0.638	0.29	8.63215e-31	AD	PCM1
ZNF483	6.49331e-35	0.699882	0.273	0.09	8.7835e-31	AD	ZNF483
MLST8	6.77169e-35	1.91615	0.119	0.018	9.16006e-31	AD	MLST8
BPTF	6.78637e-35	0.877462	0.206	0.057	9.17993e-31	AD	BPTF
KIAA0100	7.07323e-35	1.88423	0.113	0.015	9.56796e-31	AD	KIAA0100
FEZF2	7.15009e-35	3.39934	0.083	0.005	9.67193e-31	AD	FEZF2
PDLIM4	8.77983e-35	0.851753	0.169	0.039	1.18765e-30	AD	PDLIM4
TBCD	9.17734e-35	2.16675	0.102	0.011	1.24142e-30	AD	TBCD
IPO5	9.7309e-35	1.17	0.168	0.039	1.3163e-30	AD	IPO5
CAPRIN1	1.01962e-34	0.538357	0.331	0.121	1.37924e-30	AD	CAPRIN1
VPS13D	1.03846e-34	2.54847	0.089	0.007	1.40473e-30	AD	VPS13D
GOLGA4	1.05847e-34	1.32926	0.149	0.03	1.4318e-30	AD	GOLGA4
ZSWIM9	1.06559e-34	2.09057	0.111	0.015	1.44142e-30	AD	ZSWIM9
APBB1	1.08013e-34	0.526244	0.244	0.075	1.46109e-30	AD	APBB1
MIB1	1.19845e-34	0.9911	0.202	0.056	1.62114e-30	AD	MIB1
PER2	1.20116e-34	1.86598	0.103	0.012	1.62481e-30	AD	PER2
INCENP	1.2843e-34	1.4938	0.143	0.028	1.73728e-30	AD	INCENP
TP53BP2	1.28847e-34	0.841409	0.228	0.069	1.74292e-30	AD	TP53BP2
DRAP1	1.30608e-34	0.564379	0.329	0.12	1.76673e-30	AD	DRAP1
ANXA7	1.33411e-34	0.907436	0.19	0.049	1.80465e-30	AD	ANXA7
POU3F2	1.40774e-34	0.399632	0.391	0.154	1.90425e-30	AD	POU3F2
TFPT	1.60987e-34	1.76338	0.111	0.015	2.17767e-30	AD	TFPT
VOPP1	1.77727e-34	1.00532	0.203	0.056	2.40412e-30	AD	VOPP1
ECHS1	1.7845e-34	0.382349	0.403	0.158	2.4139e-30	AD	ECHS1
SUMO1	1.83853e-34	0.951275	0.203	0.056	2.48698e-30	AD	SUMO1
NFIX	1.89563e-34	0.316539	0.575	0.253	2.56422e-30	AD	NFIX
RARRES2	1.91114e-34	1.91663	0.117	0.017	2.5852e-30	AD	RARRES2
CRBN	2.31377e-34	4.00221	0.075	0.003	3.12984e-30	AD	CRBN
LAMP11	2.39704e-34	0.458219	0.325	0.118	3.24247e-30	AD	LAMP1
CRK	2.50611e-34	2.46796	0.102	0.012	3.39001e-30	AD	CRK
TRIM66	2.53179e-34	2.84449	0.088	0.007	3.42476e-30	AD	TRIM66
KCNQ3	2.64333e-34	5.79243	0.067	0	3.57563e-30	AD	KCNQ3
LSM7	2.64975e-34	1.52552	0.132	0.023	3.58432e-30	AD	LSM7
IST1	2.8263e-34	2.37278	0.094	0.009	3.82314e-30	AD	IST1
TRAF7	2.98666e-34	3.85997	0.078	0.004	4.04005e-30	AD	TRAF7
TRIM28	3.01003e-34	1.69311	0.114	0.016	4.07166e-30	AD	TRIM28
CTDSP1	3.04176e-34	3.77068	0.078	0.004	4.11459e-30	AD	CTDSP1
DAB2IP	3.10818e-34	3.28044	0.078	0.004	4.20444e-30	AD	DAB2IP
PNPLA6	3.20562e-34	1.3129	0.14	0.027	4.33625e-30	AD	PNPLA6
OS9	3.81795e-34	0.985135	0.198	0.054	5.16454e-30	AD	OS9
NRBP21	3.85369e-34	0.232632	0.371	0.142	5.21288e-30	AD	NRBP2
TNPO1	4.06566e-34	1.96929	0.116	0.017	5.49962e-30	AD	TNPO1
TRRAP	4.21399e-34	1.63461	0.121	0.019	5.70027e-30	AD	TRRAP
RASGEF1A	4.33067e-34	1.1024	0.167	0.039	5.8581e-30	AD	RASGEF1A
ATF2	5.42508e-34	1.21996	0.159	0.035	7.3385e-30	AD	ATF2
VARS2	6.24715e-34	1.30035	0.128	0.022	8.45052e-30	AD	VARS2
ANXA5	6.52068e-34	2.14855	0.104	0.012	8.82052e-30	AD	ANXA5
KIF5C1	6.70723e-34	0.396222	0.579	0.249	9.07286e-30	AD	KIF5C
FER	6.7191e-34	0.868104	0.208	0.059	9.08893e-30	AD	FER
SYNM	6.80232e-34	0.419372	0.396	0.158	9.2015e-30	AD	SYNM
FLRT2	6.87737e-34	1.23324	0.129	0.023	9.30302e-30	AD	FLRT2
TCAP	7.9287e-34	1.28763	0.153	0.033	1.07252e-29	AD	TCAP
GPAA1	7.98893e-34	1.32275	0.14	0.027	1.08066e-29	AD	GPAA1
KIDINS220	8.31574e-34	1.21375	0.152	0.032	1.12487e-29	AD	KIDINS220
PURB	8.34394e-34	1.00997	0.205	0.059	1.12869e-29	AD	PURB
UBXN4	8.95989e-34	1.44519	0.131	0.023	1.212e-29	AD	UBXN4
NAT14	9.05503e-34	1.56073	0.135	0.025	1.22487e-29	AD	NAT14
NRG3	1.00679e-33	0.540311	0.282	0.097	1.36189e-29	AD	NRG3
CDKN1B	1.0326e-33	3.45771	0.082	0.005	1.3968e-29	AD	CDKN1B
TSC22D2	1.08329e-33	1.08565	0.162	0.037	1.46537e-29	AD	TSC22D2
UBTD1	1.10102e-33	1.24425	0.119	0.019	1.48934e-29	AD	UBTD1
CADM4	1.12302e-33	0.716095	0.239	0.075	1.51911e-29	AD	CADM4
CPNE3	1.14538e-33	2.48059	0.098	0.011	1.54936e-29	AD	CPNE3
FBLN1	1.19788e-33	0.517198	0.274	0.093	1.62037e-29	AD	FBLN1
UNC13A	1.2336e-33	4.75033	0.07	0.002	1.6687e-29	AD	UNC13A
DHX36	1.25976e-33	2.05388	0.105	0.013	1.70408e-29	AD	DHX36
SFSWAP	1.28316e-33	3.03996	0.082	0.005	1.73574e-29	AD	SFSWAP
BRD1	1.28672e-33	2.73403	0.085	0.006	1.74054e-29	AD	BRD1
KCNMA1	1.31126e-33	0.30829	0.437	0.179	1.77374e-29	AD	KCNMA1
HGS	1.3792e-33	0.749797	0.25	0.082	1.86564e-29	AD	HGS
GNL1	1.38317e-33	1.80723	0.11	0.015	1.87101e-29	AD	GNL1
STX6	1.83058e-33	2.25401	0.095	0.01	2.47623e-29	AD	STX6
DMXL1	1.95471e-33	1.27899	0.137	0.026	2.64413e-29	AD	DMXL1
LY6H	2.06337e-33	0.545075	0.366	0.142	2.79112e-29	AD	LY6H
GOLPH3	2.09685e-33	3.87161	0.073	0.003	2.83641e-29	AD	GOLPH3
LONP1	2.17355e-33	1.36489	0.139	0.027	2.94016e-29	AD	LONP1
CNOT3	2.23861e-33	2.47262	0.096	0.01	3.02817e-29	AD	CNOT3
EEF2K	2.25684e-33	1.71546	0.108	0.015	3.05283e-29	AD	EEF2K
EFR3B	2.31625e-33	0.249103	0.46	0.192	3.13319e-29	AD	EFR3B
BAZ2B	2.36413e-33	1.45977	0.126	0.022	3.19796e-29	AD	BAZ2B
NUCB1	2.42723e-33	0.689313	0.218	0.064	3.28332e-29	AD	NUCB1
RAB21	2.43046e-33	1.61989	0.112	0.016	3.28769e-29	AD	RAB21
CDC42EP4	2.4917e-33	0.390262	0.64	0.302	3.37052e-29	AD	CDC42EP4
GM2A	2.5911e-33	1.04635	0.183	0.048	3.50498e-29	AD	GM2A
TPRG1L	2.64314e-33	3.52566	0.079	0.004	3.57538e-29	AD	TPRG1L
SELENON	2.8011e-33	3.36428	0.079	0.004	3.78905e-29	AD	SELENON
CAPN1	2.81231e-33	1.21311	0.143	0.029	3.80421e-29	AD	CAPN1
PLCG1	2.81576e-33	0.344288	0.299	0.107	3.80887e-29	AD	PLCG1
TBC1D14	2.85849e-33	2.87545	0.087	0.007	3.86668e-29	AD	TBC1D14
SYVN1	3.14183e-33	0.978402	0.179	0.046	4.24995e-29	AD	SYVN1
FNDC4	3.41695e-33	0.774643	0.195	0.054	4.6221e-29	AD	FNDC4
MT1F1	3.44241e-33	0.474724	0.77	0.394	4.65655e-29	AD	MT1F
TNS3	3.49841e-33	2.80545	0.079	0.004	4.7323e-29	AD	TNS3
SLC24A31	3.54259e-33	1.11383	0.155	0.035	4.79206e-29	AD	SLC24A3
URI1	3.65814e-33	1.10467	0.162	0.038	4.94837e-29	AD	URI1
SERGEF	3.6592e-33	0.743384	0.285	0.101	4.9498e-29	AD	SERGEF
HAGH	3.79506e-33	0.276948	0.543	0.237	5.13357e-29	AD	HAGH
POLR3H	3.90563e-33	0.22014	0.539	0.235	5.28315e-29	AD	POLR3H
ZMAT2	4.04718e-33	0.492375	0.319	0.117	5.47462e-29	AD	ZMAT2
EXOC3	4.18648e-33	0.631473	0.245	0.079	5.66305e-29	AD	EXOC3
SLC25A11	4.42624e-33	0.728938	0.204	0.058	5.98737e-29	AD	SLC25A11
HDLBP	4.54711e-33	0.32727	0.433	0.176	6.15087e-29	AD	HDLBP
STAT31	4.83063e-33	1.04819	0.162	0.038	6.5344e-29	AD	STAT3
LDHD	5.18145e-33	2.47529	0.091	0.009	7.00895e-29	AD	LDHD
HDAC11	5.47069e-33	1.7543	0.116	0.018	7.40021e-29	AD	HDAC11
GAB1	5.51962e-33	2.22221	0.094	0.01	7.46638e-29	AD	GAB1
GOLGA7B	5.8996e-33	0.319122	0.51	0.224	7.98038e-29	AD	GOLGA7B
PAIP2B	6.04256e-33	0.993967	0.192	0.053	8.17377e-29	AD	PAIP2B
ADORA1	6.28517e-33	2.07595	0.095	0.01	8.50195e-29	AD	ADORA1
SLC27A1	7.02051e-33	0.210632	0.371	0.145	9.49665e-29	AD	SLC27A1
HDHD3	7.49118e-33	1.07075	0.161	0.038	1.01333e-28	AD	HDHD3
ROCK1	7.64336e-33	3.5737	0.075	0.004	1.03392e-28	AD	ROCK1
ECH1	8.08283e-33	2.50328	0.092	0.009	1.09336e-28	AD	ECH1
GNA11	8.2265e-33	3.54565	0.075	0.004	1.1128e-28	AD	GNA11
C14orf132	8.36233e-33	0.372467	0.415	0.17	1.13117e-28	AD	C14orf132
ZNF428	8.44111e-33	0.462989	0.319	0.119	1.14183e-28	AD	ZNF428
CD151	8.58016e-33	1.98062	0.104	0.013	1.16064e-28	AD	CD151
ARID1A	9.10215e-33	0.374787	0.373	0.148	1.23125e-28	AD	ARID1A
YKT6	9.50818e-33	0.947051	0.184	0.049	1.28617e-28	AD	YKT6
STK32C	9.9014e-33	1.52329	0.141	0.029	1.33936e-28	AD	STK32C
ROGDI	1.10428e-32	1.24198	0.152	0.034	1.49376e-28	AD	ROGDI
TTC7B	1.13124e-32	0.559202	0.32	0.12	1.53024e-28	AD	TTC7B
EXTL3	1.13603e-32	2.9123	0.08	0.005	1.53671e-28	AD	EXTL3
GMNN	1.23026e-32	1.10128	0.173	0.044	1.66417e-28	AD	GMNN
PGM1	1.24096e-32	0.35848	0.287	0.102	1.67864e-28	AD	PGM1
ZC3H15	1.29317e-32	2.20964	0.101	0.012	1.74927e-28	AD	ZC3H15
SMARCC21	1.31773e-32	0.47636	0.258	0.086	1.78249e-28	AD	SMARCC2
NDRG3	1.38219e-32	0.833974	0.197	0.055	1.86968e-28	AD	NDRG3
SEC61G	1.4306e-32	0.99669	0.174	0.044	1.93518e-28	AD	SEC61G
BIN1	1.51328e-32	2.53281	0.091	0.009	2.04701e-28	AD	BIN1
SPSB3	1.60065e-32	2.03442	0.103	0.013	2.1652e-28	AD	SPSB3
KCNC4	1.6107e-32	2.40278	0.087	0.008	2.17879e-28	AD	KCNC4
MGRN1	1.61608e-32	0.689973	0.198	0.056	2.18607e-28	AD	MGRN1
CAPN10	1.67273e-32	1.4819	0.132	0.025	2.2627e-28	AD	CAPN10
USP14	1.67603e-32	1.2654	0.142	0.03	2.26716e-28	AD	USP14
MYO15B	1.7897e-32	2.38593	0.091	0.009	2.42093e-28	AD	MYO15B
SHARPIN	1.81112e-32	2.71679	0.081	0.006	2.44991e-28	AD	SHARPIN
DNAL1	2.00675e-32	1.66097	0.117	0.019	2.71452e-28	AD	DNAL1
PRPF3	2.05533e-32	1.4898	0.124	0.022	2.78024e-28	AD	PRPF3
PHRF1	2.21942e-32	1.3541	0.135	0.027	3.00221e-28	AD	PHRF1
UBXN10	2.28949e-32	0.841881	0.192	0.054	3.097e-28	AD	UBXN10
RBM25	2.34882e-32	0.941864	0.19	0.052	3.17725e-28	AD	RBM25
PCDH10	2.36093e-32	1.52078	0.119	0.02	3.19363e-28	AD	PCDH10
GAB2	2.44507e-32	3.37888	0.077	0.004	3.30744e-28	AD	GAB2
ZSWIM8	2.54777e-32	1.29476	0.14	0.029	3.44637e-28	AD	ZSWIM8
RAVER2	2.60478e-32	0.637959	0.206	0.06	3.52349e-28	AD	RAVER2
RIPOR2	2.63931e-32	2.21035	0.1	0.012	3.5702e-28	AD	RIPOR2
SPECC1	2.68764e-32	0.434198	0.737	0.354	3.63557e-28	AD	SPECC1
PGGHG	2.85021e-32	1.77659	0.11	0.016	3.85548e-28	AD	PGGHG
EHMT2	2.89379e-32	2.17024	0.085	0.007	3.91443e-28	AD	EHMT2
MDFIC	2.90718e-32	2.55422	0.096	0.011	3.93255e-28	AD	MDFIC
COL16A1	2.94991e-32	0.395601	0.266	0.092	3.99034e-28	AD	COL16A1
ARAP1	3.12054e-32	0.73661	0.176	0.045	4.22115e-28	AD	ARAP1
OAZ2	3.18892e-32	0.333386	0.417	0.17	4.31365e-28	AD	OAZ2
ADCY1	3.27088e-32	3.76358	0.072	0.003	4.42452e-28	AD	ADCY1
TAX1BP3	3.32294e-32	1.34017	0.128	0.023	4.49494e-28	AD	TAX1BP3
LIMK1	3.39612e-32	4.34382	0.067	0.002	4.59393e-28	AD	LIMK1
EFR3A	3.62934e-32	1.74198	0.108	0.016	4.90941e-28	AD	EFR3A
PHF2	3.64954e-32	3.66842	0.072	0.003	4.93674e-28	AD	PHF2
ERCC6L2	3.69394e-32	1.38752	0.151	0.034	4.9968e-28	AD	ERCC6L2
ECHDC2	3.73838e-32	0.568069	0.324	0.126	5.0569e-28	AD	ECHDC2
HMGN3	3.75102e-32	0.67099	0.292	0.107	5.07401e-28	AD	HMGN3
JAKMIP3	3.98207e-32	2.54657	0.086	0.008	5.38655e-28	AD	JAKMIP3
PRCC	4.0035e-32	1.31553	0.129	0.024	5.41554e-28	AD	PRCC
AMFR	4.41615e-32	1.99254	0.096	0.011	5.97372e-28	AD	AMFR
LRRC57	4.54706e-32	3.27207	0.075	0.004	6.15081e-28	AD	LRRC57
KIAA1958	4.76903e-32	0.818561	0.171	0.043	6.45107e-28	AD	KIAA1958
PLXDC2	4.84524e-32	2.14555	0.093	0.01	6.55416e-28	AD	PLXDC2
PITPNM2	4.88672e-32	1.2475	0.149	0.033	6.61027e-28	AD	PITPNM2
RHOU	4.92977e-32	1.19013	0.139	0.028	6.6685e-28	AD	RHOU
CHD4	4.95636e-32	0.652016	0.213	0.064	6.70447e-28	AD	CHD4
ZNF827	5.0412e-32	0.861327	0.18	0.048	6.81923e-28	AD	ZNF827
NDUFV1	5.36242e-32	0.412253	0.356	0.139	7.25374e-28	AD	NDUFV1
KIAA0319L	5.84745e-32	1.72413	0.112	0.017	7.90985e-28	AD	KIAA0319L
CNDP2	6.11309e-32	0.755126	0.221	0.068	8.26917e-28	AD	CNDP2
MCRIP2	6.36553e-32	2.35935	0.087	0.008	8.61066e-28	AD	MCRIP2
RBM17	6.55554e-32	2.44332	0.091	0.009	8.86768e-28	AD	RBM17
SYNGAP11	6.67841e-32	0.278863	0.495	0.212	9.03388e-28	AD	SYNGAP1
MAFG	6.70485e-32	0.631262	0.201	0.059	9.06964e-28	AD	MAFG
CPEB2	7.28827e-32	1.27499	0.124	0.022	9.85884e-28	AD	CPEB2
DAAM1	7.57501e-32	0.318954	0.369	0.147	1.02467e-27	AD	DAAM1
RAB2A	8.64664e-32	0.379072	0.422	0.176	1.16963e-27	AD	RAB2A
SMTN	8.76194e-32	2.80417	0.079	0.005	1.18523e-27	AD	SMTN
CDK10	9.37644e-32	1.58314	0.114	0.018	1.26835e-27	AD	CDK10
RTF2	9.68152e-32	0.832065	0.188	0.052	1.30962e-27	AD	RTF2
MDH2	1.0064e-31	1.68849	0.114	0.018	1.36136e-27	AD	MDH2
ULK2	1.01728e-31	0.929852	0.208	0.063	1.37607e-27	AD	ULK2
TBRG1	1.02634e-31	2.41669	0.091	0.01	1.38833e-27	AD	TBRG1
CABLES1	1.02821e-31	0.350939	0.503	0.227	1.39085e-27	AD	CABLES1
TMEM219	1.0543e-31	1.48566	0.13	0.025	1.42615e-27	AD	TMEM219
GTF3C5	1.10315e-31	2.57975	0.085	0.008	1.49224e-27	AD	GTF3C5
RABGEF1	1.14268e-31	2.20179	0.096	0.012	1.54571e-27	AD	RABGEF1
CLYBL	1.14952e-31	1.17583	0.138	0.029	1.55496e-27	AD	CLYBL
C1QTNF4	1.19116e-31	1.01848	0.161	0.039	1.61128e-27	AD	C1QTNF4
TRAF3IP2	1.24051e-31	1.05868	0.145	0.032	1.67803e-27	AD	TRAF3IP2
PPIG	1.26324e-31	3.18728	0.074	0.004	1.70878e-27	AD	PPIG
CDKL3	1.30984e-31	1.25239	0.134	0.027	1.77182e-27	AD	CDKL3
DUT	1.35766e-31	0.712323	0.212	0.064	1.83651e-27	AD	DUT
ACTR1A	1.41833e-31	0.55471	0.263	0.091	1.91857e-27	AD	ACTR1A
ATP2C1	1.42937e-31	1.2888	0.15	0.034	1.93351e-27	AD	ATP2C1
CREBBP	1.45262e-31	2.72062	0.082	0.007	1.96496e-27	AD	CREBBP
PCDH7	1.45955e-31	1.57304	0.123	0.022	1.97433e-27	AD	PCDH7
PTOV1	1.47744e-31	0.34125	0.496	0.217	1.99853e-27	AD	PTOV1
TNPO2	1.54769e-31	0.592292	0.213	0.065	2.09356e-27	AD	TNPO2
MARCH3	1.57784e-31	1.42458	0.147	0.033	2.13434e-27	AD	MARCH3
BSDC1	1.60162e-31	1.44233	0.143	0.031	2.16651e-27	AD	BSDC1
CKAP5	1.90823e-31	0.758647	0.226	0.072	2.58126e-27	AD	CKAP5
POU6F1	1.95099e-31	1.23539	0.143	0.031	2.6391e-27	AD	POU6F1
PPP2R5C	2.0351e-31	0.368146	0.459	0.196	2.75287e-27	AD	PPP2R5C
UBE2I	2.05272e-31	0.485794	0.317	0.121	2.77672e-27	AD	UBE2I
EIF5B	2.06375e-31	3.4658	0.072	0.004	2.79164e-27	AD	EIF5B
JPT1	2.06552e-31	2.25264	0.09	0.009	2.79403e-27	AD	JPT1
C10orf1051	2.08571e-31	0.52901	0.211	0.065	2.82133e-27	AD	C10orf105
JPH4	2.12237e-31	4.31003	0.067	0.002	2.87093e-27	AD	JPH4
TBC1D17	2.15222e-31	0.918347	0.159	0.039	2.91131e-27	AD	TBC1D17
XPO6	2.15915e-31	2.71189	0.083	0.007	2.92068e-27	AD	XPO6
CCAR21	2.29289e-31	0.838105	0.194	0.056	3.10159e-27	AD	CCAR2
B4GALT2	2.37051e-31	2.44107	0.083	0.007	3.20659e-27	AD	B4GALT2
RBM5	2.50034e-31	0.868854	0.18	0.049	3.38221e-27	AD	RBM5
HNRNPUL1	2.54777e-31	0.322122	0.605	0.275	3.44637e-27	AD	HNRNPUL1
HNRNPLL	2.66931e-31	1.63892	0.113	0.018	3.61078e-27	AD	HNRNPLL
MEGF9	2.67988e-31	0.294722	0.339	0.132	3.62508e-27	AD	MEGF9
WDR17	2.81214e-31	0.660596	0.218	0.068	3.80398e-27	AD	WDR17
VAMP3	2.9253e-31	4.43733	0.066	0.002	3.95705e-27	AD	VAMP3
BNIP3L	2.99998e-31	0.383321	0.434	0.184	4.05808e-27	AD	BNIP3L
UBE2E3	3.0901e-31	0.282229	0.385	0.155	4.17998e-27	AD	UBE2E3
CALD1	3.09918e-31	3.43137	0.07	0.003	4.19226e-27	AD	CALD1
MSL1	3.11159e-31	0.668381	0.216	0.067	4.20904e-27	AD	MSL1
PDXK	3.15623e-31	2.55086	0.084	0.008	4.26944e-27	AD	PDXK
CSNK1E	3.1935e-31	3.3133	0.07	0.003	4.31984e-27	AD	CSNK1E
FAS	3.22288e-31	1.6009	0.11	0.017	4.35959e-27	AD	FAS
C19orf12	3.24485e-31	1.54396	0.123	0.023	4.38931e-27	AD	C19orf12
ARPC3	3.25758e-31	0.768412	0.203	0.06	4.40652e-27	AD	ARPC3
TOM1L2	3.31292e-31	0.291179	0.363	0.144	4.48138e-27	AD	TOM1L2
HOMER3	3.68772e-31	1.31293	0.151	0.035	4.98838e-27	AD	HOMER3
MAP4K5	3.69871e-31	1.44303	0.137	0.029	5.00325e-27	AD	MAP4K5
HADHA	4.07984e-31	0.629886	0.227	0.073	5.51879e-27	AD	HADHA
TCERG1	4.36135e-31	2.86194	0.076	0.005	5.8996e-27	AD	TCERG1
TMEM176A	4.41847e-31	0.751237	0.249	0.086	5.97687e-27	AD	TMEM176A
GPR137B1	4.42207e-31	0.415467	0.322	0.123	5.98174e-27	AD	GPR137B
BTBD9	4.54051e-31	0.701407	0.201	0.06	6.14195e-27	AD	BTBD9
AMER2	4.56306e-31	0.307527	0.417	0.174	6.17246e-27	AD	AMER2
ATG9A	4.71115e-31	1.50067	0.124	0.023	6.37277e-27	AD	ATG9A
BCL9L	4.93995e-31	2.38398	0.085	0.008	6.68227e-27	AD	BCL9L
SAR1B	5.12954e-31	1.90524	0.105	0.016	6.93872e-27	AD	SAR1B
GPRC5C	5.64327e-31	1.72362	0.113	0.019	7.63365e-27	AD	GPRC5C
ZNF710	5.69264e-31	2.034	0.085	0.008	7.70044e-27	AD	ZNF710
SSR3	6.18347e-31	0.928156	0.172	0.045	8.36438e-27	AD	SSR3
EPS15L1	6.52025e-31	0.362451	0.25	0.085	8.81994e-27	AD	EPS15L1
MROH1	6.57647e-31	0.762665	0.166	0.043	8.896e-27	AD	MROH1
MAST4	6.74549e-31	0.291115	0.28	0.101	9.12463e-27	AD	MAST4
VGLL4	6.99944e-31	1.16344	0.14	0.03	9.46814e-27	AD	VGLL4
TBC1D20	7.25311e-31	1.8745	0.103	0.015	9.81128e-27	AD	TBC1D20
CHD6	7.35604e-31	1.14783	0.153	0.037	9.95051e-27	AD	CHD6
RNF19A	7.37752e-31	0.623594	0.229	0.074	9.97957e-27	AD	RNF19A
JTB	7.55986e-31	0.964527	0.158	0.039	1.02262e-26	AD	JTB
C11orf95	7.82957e-31	1.71545	0.108	0.017	1.05911e-26	AD	C11orf95
DMPK	7.95211e-31	0.329726	0.357	0.143	1.07568e-26	AD	DMPK
UBE2B	8.90324e-31	0.388731	0.328	0.125	1.20434e-26	AD	UBE2B
PTPN23	9.01503e-31	2.63714	0.083	0.008	1.21946e-26	AD	PTPN23
HINT1	9.22052e-31	0.475376	0.284	0.102	1.24726e-26	AD	HINT1
LCAT	9.29262e-31	1.14852	0.165	0.043	1.25701e-26	AD	LCAT
UBXN11	9.67933e-31	1.35575	0.123	0.023	1.30932e-26	AD	UBXN11
DAG1	1.03755e-30	0.55991	0.236	0.078	1.4035e-26	AD	DAG1
ADAMTS13	1.03925e-30	0.990822	0.154	0.037	1.40579e-26	AD	ADAMTS13
SIN3B	1.07035e-30	2.43045	0.087	0.009	1.44786e-26	AD	SIN3B
TMX4	1.07757e-30	0.67057	0.231	0.075	1.45763e-26	AD	TMX4
GAREM1	1.07955e-30	0.999702	0.146	0.034	1.46031e-26	AD	GAREM1
MDGA1	1.0856e-30	2.17531	0.087	0.009	1.46849e-26	AD	MDGA1
JMY	1.08869e-30	3.16005	0.072	0.004	1.47267e-26	AD	JMY
PPP4R2	1.15942e-30	1.80882	0.111	0.018	1.56835e-26	AD	PPP4R2
NR3C2	1.16098e-30	1.40988	0.126	0.024	1.57046e-26	AD	NR3C2
NF2	1.20123e-30	1.74703	0.109	0.017	1.62491e-26	AD	NF2
TMBIM1	1.23092e-30	0.185419	0.355	0.14	1.66506e-26	AD	TMBIM1
ATXN2	1.23613e-30	1.10034	0.165	0.043	1.67211e-26	AD	ATXN2
PPP1R3D	1.26849e-30	2.31763	0.084	0.008	1.71589e-26	AD	PPP1R3D
FZR1	1.56699e-30	2.25271	0.088	0.009	2.11967e-26	AD	FZR1
DCTN31	1.60928e-30	0.596305	0.249	0.085	2.17688e-26	AD	DCTN3
BRSK2	1.62298e-30	2.38137	0.092	0.011	2.1954e-26	AD	BRSK2
BAG31	1.63289e-30	0.305125	0.341	0.134	2.20881e-26	AD	BAG3
PSMG4	1.64324e-30	1.01015	0.149	0.035	2.22281e-26	AD	PSMG4
AP1G2	1.74284e-30	3.01948	0.079	0.006	2.35754e-26	AD	AP1G2
MTMR4	1.75114e-30	3.43031	0.07	0.004	2.36876e-26	AD	MTMR4
RSF1	1.76622e-30	2.42287	0.081	0.007	2.38917e-26	AD	RSF1
FAM169A	1.88052e-30	0.900707	0.191	0.056	2.54378e-26	AD	FAM169A
CDC42BPA	1.9184e-30	2.1402	0.092	0.011	2.59502e-26	AD	CDC42BPA
TRA2B	1.96612e-30	1.15481	0.148	0.035	2.65957e-26	AD	TRA2B
MAGI21	1.98148e-30	0.525159	0.189	0.054	2.68035e-26	AD	MAGI2
AP3D11	1.99917e-30	0.327428	0.393	0.163	2.70428e-26	AD	AP3D1
SBF2	2.08656e-30	2.42334	0.085	0.008	2.82249e-26	AD	SBF2
STK17B	2.11902e-30	0.573626	0.236	0.079	2.8664e-26	AD	STK17B
CALY	2.20086e-30	2.30622	0.093	0.012	2.97711e-26	AD	CALY
FGD4	2.20217e-30	0.580952	0.22	0.07	2.97887e-26	AD	FGD4
RBP1	2.23053e-30	2.73351	0.076	0.005	3.01724e-26	AD	RBP1
GLRX5	2.32705e-30	1.87807	0.102	0.015	3.1478e-26	AD	GLRX5
RHOA	2.40775e-30	0.296477	0.575	0.254	3.25696e-26	AD	RHOA
RAB1B	2.53934e-30	4.33691	0.064	0.002	3.43496e-26	AD	RAB1B
GSK3A	2.54092e-30	3.73494	0.068	0.003	3.4371e-26	AD	GSK3A
TMEM9	2.5687e-30	0.494308	0.292	0.108	3.47468e-26	AD	TMEM9
CUL3	2.74725e-30	1.29268	0.12	0.022	3.71621e-26	AD	CUL3
PICALM	2.83456e-30	3.677	0.071	0.004	3.83431e-26	AD	PICALM
ZNF362	2.8443e-30	2.22496	0.09	0.01	3.84748e-26	AD	ZNF362
LRRC27	3.13328e-30	0.568054	0.187	0.053	4.23838e-26	AD	LRRC27
FMNL2	3.14319e-30	0.410217	0.421	0.181	4.25179e-26	AD	FMNL2
SLC18B1	3.15796e-30	1.0333	0.203	0.064	4.27177e-26	AD	SLC18B1
MYO18A	3.17863e-30	1.20714	0.136	0.029	4.29973e-26	AD	MYO18A
NDUFS8	3.23349e-30	0.631085	0.267	0.096	4.37395e-26	AD	NDUFS8
CLCN7	3.60392e-30	1.11365	0.168	0.045	4.87502e-26	AD	CLCN7
IFT140	3.69029e-30	1.80361	0.099	0.014	4.99185e-26	AD	IFT140
POLDIP3	4.18497e-30	0.779252	0.186	0.053	5.66101e-26	AD	POLDIP3
ACAA2	4.19349e-30	1.77477	0.114	0.02	5.67254e-26	AD	ACAA2
ASB3	4.26519e-30	0.953273	0.167	0.044	5.76952e-26	AD	ASB3
SMARCB1	4.31879e-30	0.633137	0.243	0.083	5.84203e-26	AD	SMARCB1
PLSCR4	4.32516e-30	0.710547	0.195	0.058	5.85064e-26	AD	PLSCR4
CADM2	4.36166e-30	0.336896	0.326	0.125	5.90002e-26	AD	CADM2
MBOAT7	4.4279e-30	0.833018	0.2	0.061	5.98961e-26	AD	MBOAT7
DPP71	4.529e-30	0.459628	0.306	0.117	6.12638e-26	AD	DPP7
SDF4	4.91908e-30	0.707622	0.235	0.079	6.65404e-26	AD	SDF4
HSBP1	4.96319e-30	0.70136	0.215	0.068	6.71371e-26	AD	HSBP1
IQCG	5.05893e-30	1.78293	0.096	0.013	6.84321e-26	AD	IQCG
MTA3	5.12922e-30	0.777192	0.205	0.063	6.93829e-26	AD	MTA3
NWD1	5.13211e-30	0.405843	0.26	0.093	6.94221e-26	AD	NWD1
SNAP47	5.4085e-30	1.29762	0.129	0.027	7.31607e-26	AD	SNAP47
ATXN7L3	5.41567e-30	2.42502	0.084	0.008	7.32578e-26	AD	ATXN7L3
ZNF641	5.59509e-30	2.84617	0.078	0.006	7.56848e-26	AD	ZNF641
LUC7L	6.12136e-30	0.561177	0.275	0.101	8.28036e-26	AD	LUC7L
TMEM132B	6.2051e-30	1.23567	0.133	0.028	8.39363e-26	AD	TMEM132B
PKIG	6.26068e-30	0.869143	0.17	0.046	8.46882e-26	AD	PKIG
AIDA	6.49797e-30	1.54151	0.122	0.023	8.7898e-26	AD	AIDA
SAT2	6.93182e-30	0.616001	0.249	0.086	9.37668e-26	AD	SAT2
TUBGCP6	6.99385e-30	0.725587	0.208	0.065	9.46058e-26	AD	TUBGCP6
STRN3	7.08931e-30	1.67165	0.101	0.015	9.58971e-26	AD	STRN3
CLUH	7.64411e-30	1.26069	0.107	0.017	1.03402e-25	AD	CLUH
EIF3G	7.71126e-30	1.06272	0.145	0.034	1.0431e-25	AD	EIF3G
LRRC47	7.9009e-30	1.91129	0.097	0.013	1.06875e-25	AD	LRRC47
PCNT	7.95371e-30	1.56508	0.107	0.017	1.0759e-25	AD	PCNT
TBC1D5	9.41456e-30	2.46946	0.079	0.007	1.27351e-25	AD	TBC1D5
TNRC18	9.56758e-30	3.21985	0.07	0.004	1.29421e-25	AD	TNRC18
SPRY21	1.00656e-29	0.214571	0.302	0.115	1.36157e-25	AD	SPRY2
ALDH4A1	1.00895e-29	2.77497	0.076	0.006	1.36481e-25	AD	ALDH4A1
SAP25	1.0411e-29	2.03083	0.082	0.008	1.40829e-25	AD	SAP25
SLK	1.06625e-29	2.78222	0.073	0.005	1.44231e-25	AD	SLK
SHC2	1.12945e-29	5.40277	0.059	0.001	1.52781e-25	AD	SHC2
GRAMD1C	1.16977e-29	1.32306	0.13	0.027	1.58235e-25	AD	GRAMD1C
CBR1	1.18831e-29	0.441704	0.267	0.095	1.60742e-25	AD	CBR1
FBXO31	1.23987e-29	2.28131	0.086	0.009	1.67717e-25	AD	FBXO31
NRARP	1.29706e-29	2.09186	0.09	0.011	1.75454e-25	AD	NRARP
SNRNP200	1.33876e-29	1.51676	0.122	0.024	1.81094e-25	AD	SNRNP200
DGLUCY	1.3405e-29	0.837285	0.147	0.035	1.8133e-25	AD	DGLUCY
TBCB	1.39678e-29	0.458226	0.294	0.11	1.88942e-25	AD	TBCB
TUBGCP2	1.43681e-29	1.21418	0.139	0.031	1.94358e-25	AD	TUBGCP2
FBXL5	1.45456e-29	0.710117	0.206	0.064	1.96758e-25	AD	FBXL5
GORASP1	1.45688e-29	0.970697	0.144	0.034	1.97072e-25	AD	GORASP1
ZNF528	1.46581e-29	1.59016	0.111	0.019	1.9828e-25	AD	ZNF528
PRKDC	1.56986e-29	3.00718	0.071	0.004	2.12355e-25	AD	PRKDC
CHKB	1.66498e-29	1.99884	0.095	0.013	2.25221e-25	AD	CHKB
PRKD1	1.67776e-29	1.27715	0.105	0.017	2.2695e-25	AD	PRKD1
PFN1	1.72916e-29	1.675	0.105	0.017	2.33904e-25	AD	PFN1
BRD3OS	1.7415e-29	1.25422	0.143	0.034	2.35573e-25	AD	BRD3OS
SUPT6H	1.82323e-29	0.648281	0.221	0.072	2.46628e-25	AD	SUPT6H
MBNL2	1.85733e-29	0.409551	0.389	0.164	2.51241e-25	AD	MBNL2
KCNJ16	1.88463e-29	1.26663	0.126	0.026	2.54934e-25	AD	KCNJ16
LTBP31	1.91844e-29	0.244495	0.566	0.262	2.59507e-25	AD	LTBP3
NPEPL1	1.95666e-29	0.76335	0.191	0.057	2.64678e-25	AD	NPEPL1
PSMC5	1.97113e-29	0.685007	0.2	0.061	2.66635e-25	AD	PSMC5
PMPCB	1.98522e-29	0.901853	0.177	0.05	2.68541e-25	AD	PMPCB
ADGRL3	2.02394e-29	0.550249	0.266	0.097	2.73779e-25	AD	ADGRL3
CAPN5	2.02672e-29	1.31352	0.128	0.027	2.74154e-25	AD	CAPN5
TBC1D24	2.04623e-29	2.09567	0.091	0.012	2.76793e-25	AD	TBC1D24
HECTD1	2.09859e-29	1.22748	0.139	0.031	2.83877e-25	AD	HECTD1
KLC2	2.20559e-29	1.75806	0.102	0.016	2.98351e-25	AD	KLC2
ZEB1	2.21428e-29	3.44078	0.067	0.003	2.99526e-25	AD	ZEB1
KMT5B	2.23297e-29	0.953083	0.165	0.044	3.02054e-25	AD	KMT5B
VANGL2	2.44708e-29	0.880646	0.186	0.055	3.31016e-25	AD	VANGL2
RGL2	2.47648e-29	1.00662	0.147	0.035	3.34993e-25	AD	RGL2
ZNF768	2.51166e-29	2.15014	0.089	0.011	3.39752e-25	AD	ZNF768
ARHGAP24	2.55448e-29	2.59884	0.075	0.006	3.45545e-25	AD	ARHGAP24
FAM53C	3.03149e-29	1.47763	0.109	0.019	4.10069e-25	AD	FAM53C
NARS	3.04429e-29	1.75309	0.104	0.016	4.11801e-25	AD	NARS
SMYD3	3.04504e-29	2.37904	0.081	0.008	4.11902e-25	AD	SMYD3
PAQR8	3.10896e-29	4.07795	0.065	0.003	4.20549e-25	AD	PAQR8
UBALD1	3.15601e-29	2.71694	0.072	0.005	4.26913e-25	AD	UBALD1
PALLD	3.29437e-29	0.350665	0.598	0.287	4.4563e-25	AD	PALLD
KIAA0753	3.38897e-29	1.99455	0.089	0.011	4.58426e-25	AD	KIAA0753
UQCRC1	3.59742e-29	0.607944	0.227	0.076	4.86623e-25	AD	UQCRC1
CAMKV	3.67885e-29	2.8144	0.079	0.007	4.97638e-25	AD	CAMKV
RNH1	3.7439e-29	2.2591	0.079	0.007	5.06438e-25	AD	RNH1
TALDO1	3.77439e-29	1.96718	0.099	0.015	5.10561e-25	AD	TALDO1
FAM193A	3.80302e-29	1.69192	0.116	0.022	5.14435e-25	AD	FAM193A
CARD19	3.80452e-29	0.757013	0.149	0.036	5.14638e-25	AD	CARD19
CABIN1	3.85773e-29	1.4496	0.111	0.02	5.21835e-25	AD	CABIN1
BTBD1	4.27401e-29	1.93901	0.094	0.013	5.78145e-25	AD	BTBD1
VSNL1	4.3556e-29	3.48338	0.07	0.004	5.89182e-25	AD	VSNL1
AP2A1	4.66333e-29	1.2574	0.12	0.023	6.30809e-25	AD	AP2A1
UBL3	5.21319e-29	0.430701	0.317	0.124	7.05188e-25	AD	UBL3
GTPBP1	5.25124e-29	1.09569	0.14	0.032	7.10335e-25	AD	GTPBP1
VPS72	5.43859e-29	2.58505	0.079	0.008	7.35679e-25	AD	VPS72
ANKRD10	5.50569e-29	2.49991	0.079	0.008	7.44755e-25	AD	ANKRD10
UBE2K	5.84585e-29	1.07208	0.147	0.036	7.90768e-25	AD	UBE2K
CAB39L1	6.00103e-29	0.176278	0.391	0.165	8.11759e-25	AD	CAB39L
ING5	7.31306e-29	1.74427	0.103	0.016	9.89237e-25	AD	ING5
DCTD	8.17638e-29	1.31766	0.138	0.032	1.10602e-24	AD	DCTD
ANXA11	8.20442e-29	0.454631	0.314	0.124	1.10981e-24	AD	ANXA11
YWHAH1	8.22816e-29	0.326938	0.692	0.313	1.11302e-24	AD	YWHAH
DENND1A	8.337e-29	1.76838	0.11	0.02	1.12775e-24	AD	DENND1A
COPZ2	8.54097e-29	1.87432	0.104	0.017	1.15534e-24	AD	COPZ2
SMOX	8.57406e-29	0.238212	0.643	0.315	1.15981e-24	AD	SMOX
PITPNB	8.75365e-29	1.22447	0.14	0.033	1.18411e-24	AD	PITPNB
SCAP	8.85593e-29	4.04654	0.059	0.001	1.19794e-24	AD	SCAP
SAP30BP	8.90618e-29	0.765364	0.193	0.059	1.20474e-24	AD	SAP30BP
PLBD2	9.8937e-29	0.821871	0.159	0.042	1.33832e-24	AD	PLBD2
LAMB2	9.98293e-29	1.7764	0.105	0.018	1.35039e-24	AD	LAMB2
VPS13C	1.006e-28	1.47713	0.123	0.025	1.36081e-24	AD	VPS13C
TGIF1	1.0636e-28	1.23802	0.123	0.025	1.43874e-24	AD	TGIF1
IFI27L2	1.06734e-28	0.524252	0.261	0.095	1.44378e-24	AD	IFI27L2
PSMB2	1.08509e-28	0.635963	0.233	0.08	1.4678e-24	AD	PSMB2
SNX15	1.09922e-28	0.87348	0.154	0.04	1.48692e-24	AD	SNX15
ACBD4	1.19667e-28	2.2307	0.081	0.008	1.61873e-24	AD	ACBD4
EMC10	1.2389e-28	2.94996	0.072	0.005	1.67586e-24	AD	EMC10
PELP1	1.2514e-28	3.31798	0.067	0.004	1.69277e-24	AD	PELP1
RNF216	1.28065e-28	1.91008	0.094	0.013	1.73233e-24	AD	RNF216
RANBP3	1.30774e-28	0.988705	0.156	0.041	1.76897e-24	AD	RANBP3
DMTF1	1.32974e-28	1.55678	0.104	0.017	1.79874e-24	AD	DMTF1
CTDSPL	1.40649e-28	0.662884	0.219	0.073	1.90255e-24	AD	CTDSPL
FUBP3	1.46526e-28	1.30324	0.126	0.027	1.98205e-24	AD	FUBP3
CCDC32	1.74662e-28	1.77904	0.09	0.012	2.36265e-24	AD	CCDC32
GCC2	1.8073e-28	3.97042	0.06	0.002	2.44473e-24	AD	GCC2
FAM181B1	1.85936e-28	0.299052	0.591	0.28	2.51515e-24	AD	FAM181B
ZMYND11	1.88572e-28	1.0531	0.163	0.044	2.55082e-24	AD	ZMYND11
AFF1	2.00065e-28	1.23939	0.142	0.035	2.70628e-24	AD	AFF1
CAST	2.07828e-28	0.635375	0.244	0.086	2.81129e-24	AD	CAST
OPA1	2.10305e-28	0.679402	0.219	0.074	2.84479e-24	AD	OPA1
RHOT2	2.14686e-28	1.46394	0.122	0.025	2.90405e-24	AD	RHOT2
POLDIP2	2.19309e-28	1.28948	0.107	0.019	2.9666e-24	AD	POLDIP2
ZNF706	2.32853e-28	2.00618	0.091	0.012	3.1498e-24	AD	ZNF706
ASAP21	2.33909e-28	0.839347	0.129	0.028	3.16409e-24	AD	ASAP2
MARF1	2.35604e-28	1.41972	0.108	0.019	3.18702e-24	AD	MARF1
TPGS1	2.37871e-28	2.9032	0.067	0.004	3.21769e-24	AD	TPGS1
THY1	2.39825e-28	2.14391	0.087	0.011	3.24411e-24	AD	THY1
PPP2R1B	2.55512e-28	0.839933	0.134	0.031	3.45631e-24	AD	PPP2R1B
RGS12	2.56256e-28	0.493758	0.216	0.072	3.46637e-24	AD	RGS12
GOSR1	2.57737e-28	1.40942	0.121	0.025	3.4864e-24	AD	GOSR1
UNG	2.60549e-28	0.625251	0.164	0.045	3.52445e-24	AD	UNG
PIK3C2A	2.67673e-28	1.57274	0.111	0.02	3.62081e-24	AD	PIK3C2A
CCDC159	2.73501e-28	1.86884	0.088	0.011	3.69965e-24	AD	CCDC159
CBFB1	2.80238e-28	1.25797	0.118	0.023	3.79078e-24	AD	CBFB
UBE2Z	3.07868e-28	2.51623	0.077	0.007	4.16453e-24	AD	UBE2Z
GPSM2	3.08315e-28	2.30903	0.077	0.007	4.17058e-24	AD	GPSM2
CLIC4	3.18618e-28	0.607393	0.256	0.093	4.30994e-24	AD	CLIC4
RUFY21	3.23125e-28	0.727243	0.188	0.057	4.37091e-24	AD	RUFY2
MARCH2	3.27891e-28	2.72606	0.074	0.006	4.43538e-24	AD	MARCH2
ACAP2	3.41287e-28	0.624282	0.248	0.089	4.61659e-24	AD	ACAP2
GNA13	3.44697e-28	0.65707	0.187	0.056	4.66272e-24	AD	GNA13
TMEM38A	3.52051e-28	2.01244	0.089	0.012	4.76219e-24	AD	TMEM38A
HSPA91	3.54892e-28	0.294127	0.341	0.138	4.80063e-24	AD	HSPA9
AGFG2	3.68129e-28	0.338617	0.421	0.188	4.97968e-24	AD	AGFG2
FYN	4.01173e-28	0.230388	0.523	0.242	5.42667e-24	AD	FYN
MAF2	4.05026e-28	0.696498	0.161	0.043	5.47879e-24	AD	MAF
HNRNPD	4.06457e-28	0.355712	0.384	0.164	5.49814e-24	AD	HNRNPD
KRBA1	4.48051e-28	1.28797	0.115	0.022	6.06079e-24	AD	KRBA1
LHX2	4.51208e-28	0.415469	0.253	0.092	6.10349e-24	AD	LHX2
SUMF2	4.53359e-28	2.03251	0.09	0.012	6.13258e-24	AD	SUMF2
SELENBP1	4.97692e-28	0.469098	0.38	0.166	6.73227e-24	AD	SELENBP1
ACAA1	5.10795e-28	0.927038	0.158	0.043	6.90953e-24	AD	ACAA1
STARD3NL	5.22508e-28	1.68654	0.109	0.02	7.06796e-24	AD	STARD3NL
PPP2R5A	5.60559e-28	0.968566	0.125	0.027	7.58268e-24	AD	PPP2R5A
NARF	5.85309e-28	2.01946	0.086	0.011	7.91747e-24	AD	NARF
LSM14B	6.34979e-28	0.570623	0.255	0.094	8.58936e-24	AD	LSM14B
PPHLN1	6.39879e-28	1.97508	0.086	0.011	8.65565e-24	AD	PPHLN1
KDM3A	6.56563e-28	0.814766	0.153	0.04	8.88133e-24	AD	KDM3A
ANKIB1	6.61666e-28	3.08078	0.069	0.005	8.95035e-24	AD	ANKIB1
YY1	6.64413e-28	2.73976	0.072	0.006	8.98751e-24	AD	YY1
NACAD	6.8491e-28	1.59619	0.103	0.017	9.26477e-24	AD	NACAD
KDM1A	7.10958e-28	0.552054	0.265	0.099	9.61713e-24	AD	KDM1A
PCMTD1	7.21582e-28	1.93919	0.091	0.013	9.76084e-24	AD	PCMTD1
EFCAB14	7.23699e-28	1.74782	0.096	0.015	9.78948e-24	AD	EFCAB14
DTX1	7.2485e-28	0.33719	0.388	0.168	9.80504e-24	AD	DTX1
ZNF687	7.46005e-28	2.35865	0.076	0.007	1.00912e-23	AD	ZNF687
HIPK2	7.50841e-28	0.450896	0.808	0.444	1.01566e-23	AD	HIPK2
FBXL7	7.60762e-28	1.07695	0.153	0.041	1.02908e-23	AD	FBXL7
PUF60	7.83856e-28	1.01087	0.133	0.031	1.06032e-23	AD	PUF60
DCAF5	8.05648e-28	1.43202	0.112	0.021	1.0898e-23	AD	DCAF5
SMIM12	8.88336e-28	1.11133	0.151	0.039	1.20165e-23	AD	SMIM12
PHF21A	9.58885e-28	1.43807	0.114	0.022	1.29708e-23	AD	PHF21A
SRGAP3	9.6921e-28	0.501487	0.307	0.124	1.31105e-23	AD	SRGAP3
GPALPP1	9.84126e-28	1.51927	0.104	0.018	1.33123e-23	AD	GPALPP1
STAT2	9.96497e-28	1.41437	0.114	0.022	1.34796e-23	AD	STAT2
AKIRIN2	1.01111e-27	0.868156	0.162	0.045	1.36773e-23	AD	AKIRIN2
FNBP4	1.04194e-27	2.75088	0.07	0.005	1.40944e-23	AD	FNBP4
RARG	1.04869e-27	2.60114	0.073	0.006	1.41857e-23	AD	RARG
ENKD1	1.06241e-27	1.6624	0.099	0.016	1.43712e-23	AD	ENKD1
CAB39	1.07248e-27	3.17929	0.065	0.004	1.45074e-23	AD	CAB39
ZNF703	1.13198e-27	2.47734	0.077	0.008	1.53122e-23	AD	ZNF703
C8orf33	1.13447e-27	4.05106	0.06	0.002	1.5346e-23	AD	C8orf33
GNA14	1.16953e-27	0.441864	0.323	0.134	1.58202e-23	AD	GNA14
GDAP11	1.26781e-27	1.01834	0.159	0.043	1.71497e-23	AD	GDAP1
DUSP3	1.27612e-27	1.59348	0.099	0.016	1.7262e-23	AD	DUSP3
SPHK2	1.30818e-27	1.07193	0.13	0.03	1.76958e-23	AD	SPHK2
NELFB	1.31669e-27	1.711	0.094	0.014	1.78108e-23	AD	NELFB
TENM4	1.32244e-27	0.894498	0.147	0.038	1.78887e-23	AD	TENM4
DDX46	1.36684e-27	2.15946	0.08	0.009	1.84892e-23	AD	DDX46
UBE2R2	1.38237e-27	0.902697	0.171	0.05	1.86994e-23	AD	UBE2R2
SH3PXD2A	1.40237e-27	2.71964	0.074	0.007	1.89699e-23	AD	SH3PXD2A
GBF1	1.40479e-27	1.74729	0.089	0.012	1.90025e-23	AD	GBF1
CPSF6	1.4366e-27	2.56971	0.074	0.007	1.94329e-23	AD	CPSF6
UBE3A	1.47953e-27	1.48888	0.107	0.02	2.00136e-23	AD	UBE3A
TRAPPC12	1.52132e-27	0.853297	0.145	0.037	2.05789e-23	AD	TRAPPC12
DGKQ	1.52621e-27	2.17846	0.085	0.011	2.0645e-23	AD	DGKQ
IL17RC	1.5266e-27	1.59064	0.094	0.014	2.06503e-23	AD	IL17RC
U2SURP	1.52751e-27	2.5607	0.074	0.007	2.06627e-23	AD	U2SURP
BCAS4	1.55957e-27	0.79091	0.168	0.048	2.10963e-23	AD	BCAS4
NT5C2	1.56512e-27	0.107857	0.279	0.105	2.11714e-23	AD	NT5C2
C3orf18	1.57703e-27	1.10707	0.116	0.023	2.13325e-23	AD	C3orf18
TP53	1.62944e-27	1.4628	0.111	0.021	2.20415e-23	AD	TP53
ARPC5L	1.63132e-27	3.46972	0.063	0.003	2.20669e-23	AD	ARPC5L
TF	1.64924e-27	1.03954	0.149	0.039	2.23093e-23	AD	TF
EFEMP2	1.74612e-27	3.17676	0.068	0.005	2.36197e-23	AD	EFEMP2
NCOA4	1.76327e-27	3.40057	0.066	0.004	2.38518e-23	AD	NCOA4
CCDC47	1.86726e-27	1.30383	0.121	0.026	2.52584e-23	AD	CCDC47
TUSC3	1.86772e-27	2.27882	0.078	0.008	2.52646e-23	AD	TUSC3
TOP11	2.12963e-27	0.915403	0.174	0.051	2.88075e-23	AD	TOP1
CYBRD1	2.13102e-27	0.482558	0.255	0.095	2.88263e-23	AD	CYBRD1
DCXR	2.23135e-27	0.304747	0.297	0.117	3.01835e-23	AD	DCXR
EXD2	2.24492e-27	1.95512	0.082	0.01	3.03671e-23	AD	EXD2
SLC25A16	2.26752e-27	0.728915	0.197	0.063	3.06727e-23	AD	SLC25A16
SEC31A	2.55115e-27	2.39888	0.079	0.008	3.45094e-23	AD	SEC31A
CCDC124	2.55158e-27	1.40463	0.114	0.023	3.45152e-23	AD	CCDC124
HEY2	2.66915e-27	1.37625	0.104	0.018	3.61056e-23	AD	HEY2
ZNF248	2.77201e-27	0.502167	0.188	0.058	3.7497e-23	AD	ZNF248
ATP13A3	2.77737e-27	2.18141	0.083	0.01	3.75695e-23	AD	ATP13A3
BRINP11	3.00264e-27	0.194027	0.469	0.212	4.06167e-23	AD	BRINP1
BRD8	3.36296e-27	1.94228	0.101	0.017	4.54908e-23	AD	BRD8
ARRDC4	3.45011e-27	0.639374	0.248	0.091	4.66696e-23	AD	ARRDC4
PSMA4	3.52089e-27	0.899254	0.17	0.05	4.76271e-23	AD	PSMA4
AKT2	3.54166e-27	0.807907	0.165	0.047	4.79081e-23	AD	AKT2
STMN4	3.60153e-27	8.55838	0.051	0	4.87179e-23	AD	STMN4
ARHGAP32	3.72027e-27	0.733214	0.188	0.059	5.03241e-23	AD	ARHGAP32
NOC2L	3.78234e-27	1.84555	0.088	0.012	5.11637e-23	AD	NOC2L
POLG	3.79949e-27	2.05704	0.079	0.009	5.13957e-23	AD	POLG
MCFD2	4.14308e-27	0.325654	0.351	0.148	5.60435e-23	AD	MCFD2
NCOR1	4.20028e-27	0.899608	0.145	0.037	5.68171e-23	AD	NCOR1
IZUMO4	4.38113e-27	0.489335	0.285	0.112	5.92636e-23	AD	IZUMO4
POMGNT1	4.55391e-27	1.43097	0.111	0.022	6.16008e-23	AD	POMGNT1
GCDH	4.85614e-27	1.35178	0.101	0.017	6.5689e-23	AD	GCDH
CAND1	4.94581e-27	0.928562	0.156	0.043	6.6902e-23	AD	CAND1
SLC25A3	5.05395e-27	0.448407	0.281	0.109	6.83648e-23	AD	SLC25A3
STK36	5.0593e-27	2.05051	0.085	0.011	6.84372e-23	AD	STK36
C16orf74	5.37201e-27	2.05333	0.077	0.008	7.26672e-23	AD	C16orf74
FOXK2	5.40048e-27	2.82073	0.067	0.005	7.30523e-23	AD	FOXK2
NRF1	5.45146e-27	3.09777	0.065	0.004	7.37419e-23	AD	NRF1
FBRSL1	5.48171e-27	3.10625	0.065	0.004	7.41511e-23	AD	FBRSL1
PLEKHA6	5.58269e-27	1.17762	0.11	0.021	7.55171e-23	AD	PLEKHA6
S100A16	5.71168e-27	3.11688	0.065	0.004	7.72619e-23	AD	S100A16
DCTN2	5.75728e-27	0.667083	0.201	0.066	7.78788e-23	AD	DCTN2
ARL6IP5	6.03274e-27	0.258918	0.344	0.142	8.16049e-23	AD	ARL6IP5
TMEM158	6.06644e-27	4.73108	0.055	0.001	8.20608e-23	AD	TMEM158
ADI1	6.25399e-27	0.273512	0.303	0.121	8.45977e-23	AD	ADI1
PUM1	6.27508e-27	1.31549	0.113	0.023	8.4883e-23	AD	PUM1
SYMPK	6.55999e-27	1.12963	0.141	0.036	8.87369e-23	AD	SYMPK
MTA2	6.81581e-27	1.4084	0.104	0.019	9.21974e-23	AD	MTA2
MARK3	7.04334e-27	0.462047	0.252	0.094	9.52753e-23	AD	MARK3
KCTD3	7.2414e-27	1.45196	0.104	0.019	9.79544e-23	AD	KCTD3
AMPD2	7.36704e-27	1.12041	0.112	0.022	9.9654e-23	AD	AMPD2
CEBPG	7.54722e-27	2.26322	0.082	0.01	1.02091e-22	AD	CEBPG
CTNND1	7.657e-27	2.49983	0.079	0.009	1.03576e-22	AD	CTNND1
APPL2	7.91751e-27	2.06929	0.082	0.01	1.071e-22	AD	APPL2
BTRC	7.95424e-27	0.884725	0.149	0.039	1.07597e-22	AD	BTRC
ERBB4	8.14585e-27	0.512849	0.228	0.081	1.10189e-22	AD	ERBB4
TMEM181	8.45785e-27	2.41102	0.071	0.006	1.14409e-22	AD	TMEM181
ZNF6081	9.07426e-27	0.460623	0.245	0.09	1.22747e-22	AD	ZNF608
ASIC1	9.2897e-27	2.95778	0.066	0.004	1.25662e-22	AD	ASIC1
CUL9	9.51068e-27	1.79447	0.087	0.012	1.28651e-22	AD	CUL9
MTIF3	9.65734e-27	1.31163	0.136	0.034	1.30635e-22	AD	MTIF3
RAB1A	9.66321e-27	0.342023	0.329	0.137	1.30714e-22	AD	RAB1A
CACNA2D3	9.70979e-27	0.563979	0.216	0.074	1.31344e-22	AD	CACNA2D3
ZC3H18	9.81222e-27	2.14273	0.083	0.011	1.3273e-22	AD	ZC3H18
AMIGO1	1.00354e-26	4.08532	0.058	0.002	1.35749e-22	AD	AMIGO1
STXBP6	1.01321e-26	0.471715	0.346	0.152	1.37058e-22	AD	STXBP6
CAPN2	1.05808e-26	0.239328	0.526	0.25	1.43127e-22	AD	CAPN2
HIPK3	1.07381e-26	3.72842	0.058	0.002	1.45254e-22	AD	HIPK3
PPP1R9B	1.08214e-26	0.368514	0.691	0.34	1.46381e-22	AD	PPP1R9B
SALL21	1.11955e-26	0.229528	0.574	0.277	1.51441e-22	AD	SALL2
PLXNB1	1.23785e-26	0.309257	0.581	0.282	1.67443e-22	AD	PLXNB1
GSTK1	1.36145e-26	2.00882	0.084	0.011	1.84164e-22	AD	GSTK1
FBXO7	1.41553e-26	2.12617	0.079	0.009	1.91479e-22	AD	FBXO7
BRD3	1.44134e-26	2.32695	0.069	0.006	1.94971e-22	AD	BRD3
PRRT3	1.44762e-26	2.23734	0.076	0.008	1.9582e-22	AD	PRRT3
SAFB	1.47314e-26	0.547102	0.262	0.1	1.99271e-22	AD	SAFB
SDCCAG8	1.47911e-26	1.1605	0.134	0.033	2.0008e-22	AD	SDCCAG8
PSMA1	1.56375e-26	0.405462	0.306	0.125	2.11528e-22	AD	PSMA1
LRRC14	1.61122e-26	3.11938	0.064	0.004	2.1795e-22	AD	LRRC14
FBXW11	1.6211e-26	0.655544	0.189	0.061	2.19286e-22	AD	FBXW11
ABHD17C	1.63079e-26	1.23078	0.108	0.021	2.20596e-22	AD	ABHD17C
STEAP3	1.67022e-26	1.76005	0.097	0.016	2.25931e-22	AD	STEAP3
COQ8B	1.8231e-26	0.939335	0.142	0.037	2.46611e-22	AD	COQ8B
ADAR	1.82517e-26	0.504476	0.195	0.063	2.46891e-22	AD	ADAR
PCYT1A	1.83985e-26	2.48176	0.077	0.008	2.48876e-22	AD	PCYT1A
TMEM41B	1.85571e-26	1.318	0.114	0.023	2.51021e-22	AD	TMEM41B
PDPK1	1.85768e-26	1.25798	0.114	0.023	2.51289e-22	AD	PDPK1
GHITM	1.93293e-26	0.477947	0.267	0.102	2.61468e-22	AD	GHITM
RSL1D1	1.9529e-26	1.20847	0.115	0.024	2.64168e-22	AD	RSL1D1
PARVA	1.99008e-26	0.902569	0.138	0.035	2.69198e-22	AD	PARVA
DLG1	2.07239e-26	3.77876	0.059	0.003	2.80332e-22	AD	DLG1
GIGYF1	2.16368e-26	3.22752	0.059	0.003	2.92681e-22	AD	GIGYF1
MSRA	2.30581e-26	0.463303	0.287	0.114	3.11907e-22	AD	MSRA
TRAF3	2.36129e-26	1.53717	0.107	0.021	3.19411e-22	AD	TRAF3
PLXNA1	2.4605e-26	2.89372	0.067	0.005	3.32832e-22	AD	PLXNA1
GATD1	2.53544e-26	0.125677	0.346	0.145	3.42969e-22	AD	GATD1
CCDC191	2.55018e-26	1.44093	0.086	0.012	3.44963e-22	AD	CCDC191
WDR37	2.56603e-26	1.30334	0.104	0.02	3.47107e-22	AD	WDR37
CSF1	2.57283e-26	0.724241	0.149	0.04	3.48027e-22	AD	CSF1
PAPSS1	2.6945e-26	1.10495	0.143	0.038	3.64486e-22	AD	PAPSS1
QDPR1	2.79543e-26	0.979351	0.137	0.034	3.78138e-22	AD	QDPR
PHC3	2.79559e-26	1.22045	0.121	0.027	3.7816e-22	AD	PHC3
VPS13A	2.91258e-26	2.0299	0.078	0.009	3.93985e-22	AD	VPS13A
GSPT1	3.0433e-26	1.71769	0.092	0.015	4.11668e-22	AD	GSPT1
UBN2	3.07163e-26	2.59631	0.071	0.007	4.15499e-22	AD	UBN2
UBTF	3.11778e-26	0.398853	0.331	0.14	4.21742e-22	AD	UBTF
SNX27	3.17753e-26	1.41243	0.108	0.021	4.29825e-22	AD	SNX27
VAC14	3.21496e-26	1.3129	0.098	0.017	4.34888e-22	AD	VAC14
HYDIN	3.22823e-26	1.30563	0.108	0.021	4.36683e-22	AD	HYDIN
DFFA	3.28746e-26	1.72385	0.101	0.018	4.44695e-22	AD	DFFA
NPRL3	3.45224e-26	1.90968	0.079	0.009	4.66985e-22	AD	NPRL3
HEXIM1	3.616e-26	3.75912	0.06	0.003	4.89137e-22	AD	HEXIM1
DSTYK	3.66426e-26	1.95708	0.083	0.011	4.95665e-22	AD	DSTYK
IVD	3.70098e-26	0.994389	0.131	0.032	5.00631e-22	AD	IVD
TTYH2	3.81493e-26	0.987795	0.119	0.026	5.16045e-22	AD	TTYH2
USP33	3.8845e-26	1.102	0.136	0.034	5.25456e-22	AD	USP33
EHBP1	3.91672e-26	0.796194	0.171	0.052	5.29815e-22	AD	EHBP1
PRR7	4.15444e-26	3.94253	0.055	0.002	5.61971e-22	AD	PRR7
CHST12	4.24965e-26	3.0827	0.063	0.004	5.74851e-22	AD	CHST12
SP3	4.29649e-26	2.97112	0.066	0.005	5.81186e-22	AD	SP3
C2CD2	4.39221e-26	2.26499	0.068	0.006	5.94134e-22	AD	C2CD2
TFDP1	4.41643e-26	1.89931	0.09	0.014	5.9741e-22	AD	TFDP1
HIVEP2	4.42006e-26	2.70139	0.063	0.004	5.97902e-22	AD	HIVEP2
KDSR	4.51742e-26	2.34264	0.076	0.008	6.11071e-22	AD	KDSR
CSK	5.52838e-26	2.73266	0.069	0.006	7.47825e-22	AD	CSK
IFITM31	5.9313e-26	0.211479	0.572	0.26	8.02327e-22	AD	IFITM3
IDUA	5.94349e-26	1.76343	0.091	0.014	8.03976e-22	AD	IDUA
PYURF	6.16203e-26	1.93626	0.085	0.012	8.33538e-22	AD	PYURF
IFT46	6.23395e-26	0.931252	0.158	0.046	8.43266e-22	AD	IFT46
NAB2	6.27843e-26	2.43741	0.073	0.008	8.49283e-22	AD	NAB2
PSRC1	6.35472e-26	1.68415	0.091	0.014	8.59602e-22	AD	PSRC1
ERGIC1	6.39478e-26	1.58075	0.097	0.017	8.65022e-22	AD	ERGIC1
EHMT1	6.54833e-26	1.43114	0.11	0.023	8.85793e-22	AD	EHMT1
PRKCE	6.69185e-26	0.412943	0.241	0.089	9.05206e-22	AD	PRKCE
ERCC3	7.0999e-26	2.89125	0.064	0.004	9.60403e-22	AD	ERCC3
CDC42SE1	7.13366e-26	1.89645	0.086	0.012	9.6497e-22	AD	CDC42SE1
ZNF621	7.35681e-26	1.76199	0.086	0.012	9.95156e-22	AD	ZNF621
HIRA	7.53403e-26	3.06816	0.061	0.004	1.01913e-21	AD	HIRA
ZNF644	7.64677e-26	2.88891	0.064	0.004	1.03438e-21	AD	ZNF644
RHBDD3	7.75078e-26	1.13051	0.106	0.021	1.04845e-21	AD	RHBDD3
REPS1	7.95128e-26	0.156853	0.463	0.212	1.07557e-21	AD	REPS1
MAN2A1	8.17201e-26	2.78782	0.064	0.004	1.10543e-21	AD	MAN2A1
DVL3	8.46077e-26	1.45715	0.098	0.017	1.14449e-21	AD	DVL3
RNF126	8.68967e-26	2.42822	0.07	0.007	1.17545e-21	AD	RNF126
KPNB1	8.97256e-26	0.857768	0.14	0.036	1.21372e-21	AD	KPNB1
CCDC88A1	9.0041e-26	0.431905	0.24	0.088	1.21798e-21	AD	CCDC88A
HK2	9.04085e-26	3.53872	0.056	0.002	1.22296e-21	AD	HK2
SULT1A1	9.11388e-26	1.34189	0.112	0.023	1.23284e-21	AD	SULT1A1
STK38L	9.19339e-26	2.31696	0.078	0.009	1.24359e-21	AD	STK38L
STAM2	9.91506e-26	1.53767	0.1	0.018	1.34121e-21	AD	STAM2
SLC44A11	9.93021e-26	1.24453	0.11	0.023	1.34326e-21	AD	SLC44A1
AGPAT1	1.01983e-25	1.82843	0.087	0.013	1.37952e-21	AD	AGPAT1
VPS8	1.03734e-25	1.29647	0.109	0.022	1.40321e-21	AD	VPS8
ASAH1	1.0479e-25	0.467853	0.262	0.102	1.41749e-21	AD	ASAH1
ESF1	1.05694e-25	3.17759	0.065	0.005	1.42972e-21	AD	ESF1
NOL7	1.10745e-25	1.62016	0.094	0.016	1.49805e-21	AD	NOL7
SRRT	1.10943e-25	0.626858	0.198	0.066	1.50073e-21	AD	SRRT
KMT2C	1.19882e-25	0.643148	0.218	0.078	1.62165e-21	AD	KMT2C
CLASP1	1.20082e-25	0.473253	0.239	0.089	1.62434e-21	AD	CLASP1
PSMD3	1.22931e-25	1.26204	0.114	0.024	1.66289e-21	AD	PSMD3
SPIRE1	1.23868e-25	0.178399	0.415	0.187	1.67556e-21	AD	SPIRE1
TRAF3IP1	1.23972e-25	1.32999	0.094	0.016	1.67698e-21	AD	TRAF3IP1
ZCCHC7	1.25008e-25	0.576703	0.245	0.092	1.69098e-21	AD	ZCCHC7
H2AFY	1.29323e-25	1.90454	0.09	0.014	1.74935e-21	AD	H2AFY
LRRC23	1.29724e-25	2.44797	0.071	0.007	1.75477e-21	AD	LRRC23
PDK41	1.30617e-25	0.886418	0.093	0.016	1.76686e-21	AD	PDK4
CASP7	1.31371e-25	2.27973	0.065	0.005	1.77705e-21	AD	CASP7
SGSM3	1.36335e-25	2.34014	0.071	0.007	1.84421e-21	AD	SGSM3
NUP58	1.40954e-25	1.97076	0.079	0.01	1.90669e-21	AD	NUP58
LETM1	1.42094e-25	1.94297	0.083	0.012	1.92211e-21	AD	LETM1
PGLS	1.42369e-25	2.39076	0.071	0.007	1.92582e-21	AD	PGLS
DIDO1	1.45836e-25	0.847414	0.129	0.031	1.97272e-21	AD	DIDO1
MAP7	1.49553e-25	0.220462	0.615	0.293	2.02301e-21	AD	MAP7
KIF2A	1.52682e-25	2.22782	0.075	0.008	2.06533e-21	AD	KIF2A
RNF123	1.61839e-25	1.02602	0.145	0.04	2.1892e-21	AD	RNF123
MARK2	1.66183e-25	1.43294	0.095	0.016	2.24796e-21	AD	MARK2
CYC1	1.66355e-25	2.50234	0.072	0.008	2.25029e-21	AD	CYC1
INO80E	1.67801e-25	1.59202	0.09	0.014	2.26985e-21	AD	INO80E
AFF4	1.6807e-25	1.88382	0.079	0.01	2.27348e-21	AD	AFF4
APLP1	1.73678e-25	0.79087	0.176	0.055	2.34934e-21	AD	APLP1
MATN2	1.79195e-25	0.529619	0.201	0.069	2.42397e-21	AD	MATN2
EXOC5	1.85229e-25	0.824567	0.144	0.039	2.5056e-21	AD	EXOC5
ALDH6A1	1.8559e-25	0.22261	0.543	0.26	2.51048e-21	AD	ALDH6A1
SCYL1	1.88364e-25	2.77877	0.066	0.005	2.548e-21	AD	SCYL1
GRSF1	1.88571e-25	0.312907	0.302	0.123	2.55079e-21	AD	GRSF1
ATP6V0D1	1.91242e-25	0.168949	0.44	0.198	2.58693e-21	AD	ATP6V0D1
PTPA	1.94869e-25	0.23338	0.408	0.181	2.63599e-21	AD	PTPA
STX7	1.95679e-25	0.972736	0.133	0.034	2.64695e-21	AD	STX7
KLHL2	1.96884e-25	1.07935	0.142	0.039	2.66325e-21	AD	KLHL2
GPR161	1.97421e-25	1.45788	0.108	0.022	2.67051e-21	AD	GPR161
ABCD3	2.10814e-25	1.7094	0.091	0.015	2.85169e-21	AD	ABCD3
SFMBT2	2.17148e-25	0.920298	0.122	0.028	2.93737e-21	AD	SFMBT2
ATF7IP	2.17953e-25	1.22581	0.13	0.033	2.94824e-21	AD	ATF7IP
GALNT15	2.22285e-25	1.11305	0.128	0.031	3.00685e-21	AD	GALNT15
GALNT8	2.23608e-25	1.7845	0.08	0.011	3.02474e-21	AD	GALNT8
TMEM134	2.35605e-25	1.47831	0.1	0.019	3.18703e-21	AD	TMEM134
SRF	2.47263e-25	2.16881	0.077	0.009	3.34472e-21	AD	SRF
IGSF11	2.50029e-25	0.217339	0.332	0.141	3.38214e-21	AD	IGSF11
DDX1	2.64692e-25	1.83741	0.087	0.013	3.58048e-21	AD	DDX1
CFDP1	2.65024e-25	1.20044	0.109	0.023	3.58498e-21	AD	CFDP1
SUN1	2.78513e-25	1.71627	0.094	0.016	3.76745e-21	AD	SUN1
USP4	2.78849e-25	1.85363	0.088	0.014	3.77199e-21	AD	USP4
ZNF462	2.81568e-25	1.57877	0.091	0.015	3.80877e-21	AD	ZNF462
OGDHL	2.90454e-25	0.625495	0.203	0.071	3.92898e-21	AD	OGDHL
SCAF11	2.94413e-25	2.19023	0.073	0.008	3.98252e-21	AD	SCAF11
GPATCH8	2.99163e-25	1.68083	0.093	0.016	4.04678e-21	AD	GPATCH8
AKTIP	3.04857e-25	1.30874	0.116	0.026	4.1238e-21	AD	AKTIP
H1F0	3.06821e-25	3.70873	0.058	0.003	4.15037e-21	AD	H1F0
DAGLA	3.1144e-25	2.13389	0.078	0.01	4.21285e-21	AD	DAGLA
SNED1	3.14035e-25	1.31359	0.092	0.016	4.24795e-21	AD	SNED1
PITPNA	3.17756e-25	0.236046	0.38	0.166	4.29829e-21	AD	PITPNA
CTNND2	3.26336e-25	0.359346	0.821	0.527	4.41434e-21	AD	CTNND2
CRAT	3.32656e-25	1.93441	0.082	0.012	4.49984e-21	AD	CRAT
INTS3	3.47678e-25	0.428296	0.244	0.093	4.70304e-21	AD	INTS3
CCAR1	3.48596e-25	1.10291	0.128	0.032	4.71545e-21	AD	CCAR1
NEK9	3.56825e-25	1.20354	0.122	0.029	4.82677e-21	AD	NEK9
RIPOR1	3.59536e-25	4.07789	0.054	0.002	4.86345e-21	AD	RIPOR1
BAZ2A	3.77045e-25	2.44463	0.07	0.007	5.10029e-21	AD	BAZ2A
ZNF512B	3.84245e-25	1.86444	0.082	0.012	5.19768e-21	AD	ZNF512B
AXIN2	3.97745e-25	1.95001	0.083	0.012	5.3803e-21	AD	AXIN2
TLN2	4.08459e-25	0.245872	0.253	0.097	5.52522e-21	AD	TLN2
PCSK5	4.40884e-25	0.123441	0.317	0.133	5.96384e-21	AD	PCSK5
CLIP1	4.51693e-25	0.208545	0.481	0.227	6.11006e-21	AD	CLIP1
CAMK2D	4.57396e-25	1.33819	0.104	0.021	6.1872e-21	AD	CAMK2D
HCFC1R1	4.73042e-25	0.575448	0.187	0.061	6.39884e-21	AD	HCFC1R1
LRRC24	4.78616e-25	0.821836	0.131	0.033	6.47424e-21	AD	LRRC24
DIO2	4.85817e-25	0.97292	0.125	0.03	6.57165e-21	AD	DIO2
MKLN1	4.99159e-25	0.146129	0.447	0.206	6.75212e-21	AD	MKLN1
PKN2	5.00426e-25	2.52606	0.067	0.006	6.76926e-21	AD	PKN2
ZKSCAN1	5.09531e-25	2.38457	0.071	0.008	6.89243e-21	AD	ZKSCAN1
ZNF516	5.19357e-25	1.33081	0.107	0.022	7.02534e-21	AD	ZNF516
SAP130	5.27806e-25	1.55481	0.1	0.019	7.13964e-21	AD	SAP130
SHISA5	5.66964e-25	0.834144	0.15	0.043	7.66932e-21	AD	SHISA5
PCYOX1	5.90298e-25	0.855275	0.151	0.043	7.98497e-21	AD	PCYOX1
TESK1	6.27444e-25	2.42477	0.065	0.005	8.48743e-21	AD	TESK1
PTPRS	6.3336e-25	1.2232	0.111	0.024	8.56747e-21	AD	PTPRS
BDH1	6.37741e-25	1.47648	0.1	0.019	8.62672e-21	AD	BDH1
ZNF207	6.5334e-25	1.89144	0.08	0.011	8.83773e-21	AD	ZNF207
SETD7	6.82485e-25	3.99521	0.055	0.002	9.23197e-21	AD	SETD7
OSBPL1A	6.85607e-25	1.18806	0.117	0.027	9.27421e-21	AD	OSBPL1A
ARHGEF1	6.99723e-25	1.53214	0.091	0.015	9.46516e-21	AD	ARHGEF1
NDUFS3	7.31942e-25	1.00783	0.14	0.038	9.90097e-21	AD	NDUFS3
TRPV1	7.55631e-25	1.49977	0.103	0.02	1.02214e-20	AD	TRPV1
DBP	7.58821e-25	0.594019	0.149	0.042	1.02646e-20	AD	DBP
NCOA6	7.6202e-25	1.56284	0.092	0.016	1.03078e-20	AD	NCOA6
MOK	7.64326e-25	0.252389	0.29	0.118	1.0339e-20	AD	MOK
FCGRT	7.89172e-25	0.793277	0.155	0.046	1.06751e-20	AD	FCGRT
LRRC41	8.09046e-25	2.83566	0.066	0.006	1.0944e-20	AD	LRRC41
LRCH3	8.22607e-25	2.07273	0.081	0.012	1.11274e-20	AD	LRCH3
DLG2	8.44146e-25	0.893267	0.148	0.042	1.14188e-20	AD	DLG2
UNKL	9.03357e-25	1.65927	0.081	0.012	1.22197e-20	AD	UNKL
COX6A1	9.14692e-25	1.52502	0.104	0.021	1.2373e-20	AD	COX6A1
CCDC85C	9.17309e-25	0.722832	0.135	0.035	1.24084e-20	AD	CCDC85C
SEC63	9.18124e-25	1.49128	0.107	0.023	1.24195e-20	AD	SEC63
TTC38	9.29385e-25	1.90657	0.066	0.006	1.25718e-20	AD	TTC38
TMEM220	9.29551e-25	1.89366	0.077	0.01	1.2574e-20	AD	TMEM220
MMP28	9.35042e-25	0.369747	0.288	0.119	1.26483e-20	AD	MMP28
TMEM30A	9.74781e-25	0.847195	0.145	0.04	1.31859e-20	AD	TMEM30A
SOX6	9.95256e-25	1.5762	0.088	0.014	1.34628e-20	AD	SOX6
DDX19A	1.02508e-24	1.671	0.081	0.012	1.38663e-20	AD	DDX19A
FAM13A	1.04431e-24	4.01649	0.053	0.002	1.41264e-20	AD	FAM13A
NEFM	1.09031e-24	0.992596	0.133	0.035	1.47486e-20	AD	NEFM
PABPC1L	1.10694e-24	1.66625	0.082	0.012	1.49735e-20	AD	PABPC1L
DNAJA1	1.11953e-24	0.985875	0.123	0.03	1.51438e-20	AD	DNAJA1
BRWD1	1.12424e-24	0.869423	0.155	0.046	1.52076e-20	AD	BRWD1
TTYH3	1.15892e-24	0.605828	0.157	0.047	1.56768e-20	AD	TTYH3
ECE1	1.3052e-24	0.615425	0.172	0.055	1.76555e-20	AD	ECE1
RNF41	1.30595e-24	1.22031	0.118	0.028	1.76655e-20	AD	RNF41
CUEDC2	1.42951e-24	1.12469	0.124	0.031	1.9337e-20	AD	CUEDC2
DPP8	1.45278e-24	1.49702	0.098	0.019	1.96518e-20	AD	DPP8
ALKBH7	1.45667e-24	4.25007	0.051	0.001	1.97043e-20	AD	ALKBH7
NPTXR1	1.4699e-24	0.255079	0.67	0.318	1.98833e-20	AD	NPTXR
CD109	1.48928e-24	1.31546	0.132	0.035	2.01454e-20	AD	CD109
REV3L	1.51668e-24	0.959768	0.112	0.025	2.05161e-20	AD	REV3L
ZFYVE28	1.55289e-24	1.4217	0.098	0.019	2.10059e-20	AD	ZFYVE28
LPAR1	1.60481e-24	2.67402	0.064	0.005	2.17082e-20	AD	LPAR1
SURF4	1.60694e-24	1.21662	0.116	0.027	2.17371e-20	AD	SURF4
KATNAL2	1.73419e-24	0.943345	0.152	0.045	2.34584e-20	AD	KATNAL2
[truncated: 3,846 more rows]

## Sheet: Ast_DG
Unnamed: 0	p_val	avg_log2FC	pct.1	pct.2	p_val_adj	cluster	gene
HSPA8	8.15751e-12	1.56227	0.767	0.375	1.10347e-07	Control	HSPA8
CNTN1	1.0612e-09	1.4645	0.717	0.342	1.43548e-05	Control	CNTN1
NAPA	1.64558e-09	1.1139	0.833	0.533	2.22598e-05	Control	NAPA
OLFM1	9.84369e-08	0.81318	0.917	0.652	0.00133156	Control	OLFM1
PSAP	1.63761e-07	0.368525	1	1	0.0022152	Control	PSAP
GPM6A	2.83383e-07	0.54426	1	0.995	0.00383333	Control	GPM6A
UBC	1.80538e-06	0.262367	1	1	0.0244214	Control	UBC
GRINA	3.49471e-06	1.43851	0.533	0.245	0.047273	Control	GRINA
CLU	1.6923e-17	0.489132	1	1	2.28918e-13	Part	CLU
SERPINA3	1.21358e-10	3.29152	0.403	0.078	1.6416e-06	Part	SERPINA3
S100B1	2.7344e-09	0.577126	0.974	0.91	3.69882e-05	Part	S100B
MT2A	9.84865e-09	0.648683	0.948	0.802	0.000133223	Part	MT2A
HSP90AA1	3.95856e-08	0.568943	0.948	0.88	0.000535475	Part	HSP90AA1
DKK31	3.99508e-08	0.406658	1	1	0.000540414	Part	DKK3
HOPX	5.11345e-08	1.88809	0.558	0.305	0.000691696	Part	HOPX
HNRNPC	6.68561e-08	0.892118	0.844	0.605	0.000904363	Part	HNRNPC
HIST1H4C	3.65932e-07	1.10918	0.714	0.515	0.00494997	Part	HIST1H4C
PEA15	9.83675e-07	0.323215	1	0.994	0.0133062	Part	PEA15
CRYAB	3.13578e-06	0.392152	0.987	0.952	0.0424177	Part	CRYAB
SPARC	1.23871e-16	1.91498	0.757	0.27	1.6756e-12	AD	SPARC
MBP	6.57186e-13	9.32537	0.327	0	8.88975e-09	AD	MBP
ARGLU1	1.15655e-12	2.75241	0.486	0.08	1.56446e-08	AD	ARGLU1
BSG	3.17178e-11	2.86176	0.393	0.044	4.29046e-07	AD	BSG
SPOCK2	3.81047e-11	2.0223	0.542	0.124	5.15442e-07	AD	SPOCK2
DDX5	1.1278e-10	2.0499	0.551	0.153	1.52558e-06	AD	DDX5
MAP1A	1.4215e-09	3.54112	0.28	0.015	1.92286e-05	AD	MAP1A
TRIM9	8.29775e-09	2.514	0.318	0.036	0.000112244	AD	TRIM9
PRRC2C	9.59143e-09	3.50199	0.262	0.015	0.000129743	AD	PRRC2C
SFPQ	2.35433e-08	2.39459	0.29	0.029	0.000318471	AD	SFPQ
NLGN2	2.8548e-07	3.23195	0.234	0.022	0.00386169	AD	NLGN2
PKD1	3.0648e-07	1.57921	0.421	0.117	0.00414576	AD	PKD1
CABLES1	5.24185e-07	1.36779	0.421	0.117	0.00709065	AD	CABLES1
SRRM2	5.44586e-07	1.26353	0.551	0.204	0.00736661	AD	SRRM2
TNRC6A	7.90262e-07	4.76026	0.187	0.007	0.0106899	AD	TNRC6A
UBXN6	9.20972e-07	2.533	0.243	0.029	0.012458	AD	UBXN6
SYT17	1.14687e-06	1.65941	0.374	0.102	0.0155136	AD	SYT17
NHSL1	1.41362e-06	1.34527	0.458	0.153	0.019122	AD	NHSL1
LMTK3	1.42973e-06	7.83775	0.159	0	0.0193399	AD	LMTK3
SUPT5H	1.48033e-06	4.2395	0.196	0.015	0.0200245	AD	SUPT5H
UCHL1	1.65129e-06	3.09918	0.215	0.022	0.022337	AD	UCHL1
PYGB	1.68188e-06	1.3387	0.383	0.102	0.0227508	AD	PYGB
MAPK8IP3	1.8205e-06	4.23854	0.178	0.007	0.0246259	AD	MAPK8IP3
GPC1	1.82054e-06	4.349	0.178	0.007	0.0246264	AD	GPC1
MT1G	2.04581e-06	1.03771	0.897	0.62	0.0276737	AD	MT1G
NDRG2	2.07097e-06	0.423188	0.981	0.942	0.028014	AD	NDRG2
CTBP1	3.05684e-06	7.92472	0.15	0	0.0413498	AD	CTBP1
PHYHIP	3.05684e-06	7.69337	0.15	0	0.0413498	AD	PHYHIP
CRIP2	3.05684e-06	7.94883	0.15	0	0.0413498	AD	CRIP2
SRSF11	3.25605e-06	4.88383	0.168	0.007	0.0440446	AD	SRSF11

## Sheet: Ast_ML
Unnamed: 0	p_val	avg_log2FC	pct.1	pct.2	p_val_adj	cluster	gene
UBC	1.06771e-98	0.485191	1	1	1.4443e-94	Control	UBC
HSP90AA1	8.14985e-92	0.773859	1	0.994	1.10243e-87	Control	HSP90AA1
HSPA8	2.47086e-88	1.07082	0.883	0.791	3.34233e-84	Control	HSPA8
HSPA1B	1.38629e-85	3.19778	0.547	0.15	1.87523e-81	Control	HSPA1B
CKB	1.91333e-76	0.692228	1	1	2.58817e-72	Control	CKB
GPM6A	4.3105e-57	0.920944	0.98	0.985	5.83081e-53	Control	GPM6A
PEBP1	9.43857e-55	0.543514	0.929	0.967	1.27676e-50	Control	PEBP1
HSPA1A	4.06278e-50	2.95707	0.418	0.137	5.49573e-46	Control	HSPA1A
OLFM1	1.5388e-48	0.448803	0.944	0.992	2.08153e-44	Control	OLFM1
PSAP	1.70823e-48	0.471706	0.998	0.999	2.31073e-44	Control	PSAP
MAP1B	1.84659e-47	0.448226	0.988	0.99	2.49789e-43	Control	MAP1B
NCDN	7.34239e-45	0.387701	0.959	0.991	9.93206e-41	Control	NCDN
FKBP8	7.84314e-43	0.50883	0.907	0.96	1.06094e-38	Control	FKBP8
SOD1	9.93603e-41	0.48919	0.937	0.955	1.34405e-36	Control	SOD1
SLC1A2	1.06988e-35	0.655306	0.993	1	1.44723e-31	Control	SLC1A2
KLHL24	1.62275e-35	0.866525	0.743	0.713	2.1951e-31	Control	KLHL24
DKK3	4.11114e-35	0.530943	0.978	0.995	5.56113e-31	Control	DKK3
AQP4	1.82779e-34	0.475195	0.998	0.999	2.47245e-30	Control	AQP4
ARHGEF4	2.88673e-34	0.690967	0.948	0.93	3.90488e-30	Control	ARHGEF4
ATP1B2	8.56625e-34	0.64345	0.948	0.957	1.15876e-29	Control	ATP1B2
AKT3	2.80107e-33	0.758464	0.748	0.775	3.78901e-29	Control	AKT3
RTN4	2.9521e-33	0.624878	0.8	0.863	3.99331e-29	Control	RTN4
CLU	3.79569e-32	0.213946	1	1	5.13442e-28	Control	CLU
COX7C	1.51378e-31	0.458735	0.929	0.974	2.0477e-27	Control	COX7C
DPYSL2	6.43665e-30	0.41396	0.981	0.983	8.70686e-26	Control	DPYSL2
NRXN1	7.76923e-30	0.715191	0.765	0.777	1.05094e-25	Control	NRXN1
CHN1	2.16204e-29	0.628507	0.777	0.848	2.9246e-25	Control	CHN1
ABR	6.46165e-29	0.613141	0.826	0.845	8.74068e-25	Control	ABR
PEA15	9.37074e-29	0.299601	0.985	0.998	1.26758e-24	Control	PEA15
LMO3	1.03216e-28	0.775966	0.814	0.841	1.3962e-24	Control	LMO3
PRNP	7.52735e-27	0.421459	0.878	0.942	1.01823e-22	Control	PRNP
PPP2CB	1.7985e-26	0.386447	0.985	0.992	2.43283e-22	Control	PPP2CB
APOE	6.307e-26	0.469222	0.995	0.999	8.53148e-22	Control	APOE
GLUL	4.08312e-25	0.450819	0.997	1	5.52323e-21	Control	GLUL
ITM2B	6.99842e-25	0.301363	0.981	0.995	9.46677e-21	Control	ITM2B
MT3	9.20094e-25	0.372134	0.998	0.998	1.24461e-20	Control	MT3
CRYAB	2.68236e-24	0.3556	0.986	0.998	3.62843e-20	Control	CRYAB
CST3	1.01978e-23	0.34662	1	0.999	1.37946e-19	Control	CST3
PTK2	1.15959e-23	0.424182	0.826	0.921	1.56858e-19	Control	PTK2
CALM3	3.92164e-23	0.385408	0.832	0.967	5.30481e-19	Control	CALM3
KIF1B	5.31728e-22	0.419416	0.851	0.91	7.19269e-18	Control	KIF1B
ITM2C	6.55238e-22	0.499599	0.829	0.852	8.8634e-18	Control	ITM2C
S100A1	1.19992e-21	0.553041	0.897	0.933	1.62313e-17	Control	S100A1
HSPB1	3.21662e-20	0.871422	0.643	0.677	4.35112e-16	Control	HSPB1
ENO1	1.3918e-18	0.370419	0.946	0.961	1.88269e-14	Control	ENO1
ATP1A2	4.19168e-18	0.344783	0.993	0.998	5.67009e-14	Control	ATP1A2
NSMF	4.91871e-18	0.376887	1	0.999	6.65355e-14	Control	NSMF
MAPK10	1.52781e-17	0.413725	0.863	0.939	2.06667e-13	Control	MAPK10
DNAJB1	2.61982e-17	2.3797	0.24	0.102	3.54383e-13	Control	DNAJB1
VXN	3.19344e-17	0.71679	0.662	0.701	4.31976e-13	Control	VXN
NCAN	3.63635e-17	1.03043	0.572	0.492	4.91889e-13	Control	NCAN
FTH1	1.41892e-16	0.242688	0.998	0.998	1.91937e-12	Control	FTH1
HABP4	1.34247e-15	0.428381	0.765	0.873	1.81596e-11	Control	HABP4
CPE	4.0388e-15	0.251563	1	1	5.46328e-11	Control	CPE
UBB	1.09415e-14	0.919568	0.574	0.566	1.48005e-10	Control	UBB
CXCL14	1.28785e-14	1.25833	0.43	0.317	1.74208e-10	Control	CXCL14
SLC25A23	1.36916e-14	0.338235	0.817	0.91	1.85206e-10	Control	SLC25A23
CNTN1	9.70706e-14	0.474091	0.734	0.799	1.31307e-09	Control	CNTN1
DBI	1.26923e-13	0.285858	0.861	0.944	1.71688e-09	Control	DBI
CIRBP	4.92338e-13	0.425132	0.736	0.872	6.65985e-09	Control	CIRBP
PPP2R2B	5.33815e-13	0.757377	0.628	0.648	7.22092e-09	Control	PPP2R2B
SLC22A17	6.99112e-13	0.665371	0.623	0.695	9.45689e-09	Control	SLC22A17
ATN1	1.31591e-12	0.380233	0.766	0.866	1.78004e-08	Control	ATN1
NAT8L	1.83877e-12	0.679817	0.665	0.68	2.4873e-08	Control	NAT8L
DDAH1	2.3342e-12	0.744978	0.631	0.651	3.15747e-08	Control	DDAH1
PLEKHB1	2.80872e-12	0.335182	0.785	0.883	3.79936e-08	Control	PLEKHB1
IFI6	3.62917e-12	4.66073	0.064	0.007	4.90917e-08	Control	IFI6
SPTAN1	3.69112e-12	0.519119	0.658	0.742	4.99298e-08	Control	SPTAN1
ANK2	5.06568e-12	0.351439	0.782	0.868	6.85235e-08	Control	ANK2
THRA	3.2815e-11	0.496249	0.684	0.77	4.43888e-07	Control	THRA
GPRC5B	4.99938e-11	0.281576	0.851	0.927	6.76267e-07	Control	GPRC5B
GNAS	1.56869e-10	0.369342	0.711	0.86	2.12196e-06	Control	GNAS
UQCRB	4.17437e-10	0.37034	0.716	0.854	5.64668e-06	Control	UQCRB
PMP2	4.39679e-10	0.359668	0.746	0.808	5.94754e-06	Control	PMP2
RUFY3	9.32296e-10	0.558127	0.633	0.713	1.26112e-05	Control	RUFY3
CTNNA2	3.66661e-09	0.800446	0.536	0.533	4.95983e-05	Control	CTNNA2
KIF1A	6.79305e-09	0.334632	0.709	0.823	9.18896e-05	Control	KIF1A
PFKP	1.65897e-08	0.361401	0.778	0.854	0.000224408	Control	PFKP
PALM	6.65688e-08	0.322651	0.807	0.89	0.000900476	Control	PALM
TTC3	1.76e-07	0.365753	0.675	0.833	0.00238075	Control	TTC3
KLC1	1.81781e-07	0.407081	0.658	0.792	0.00245895	Control	KLC1
MAPT	2.97787e-07	0.309375	0.716	0.844	0.00402817	Control	MAPT
ARNT2	3.91982e-07	0.622565	0.565	0.64	0.00530234	Control	ARNT2
PRDX6	1.38915e-06	0.340135	0.68	0.778	0.0187911	Control	PRDX6
TUBB2A	1.65621e-06	0.67825	0.538	0.609	0.0224035	Control	TUBB2A
QKI	2.13086e-06	0.162737	0.966	0.991	0.0288242	Control	QKI
MBP	2.56514e-06	0.205236	0.733	0.922	0.0346986	Control	MBP
ASPH	2.67062e-06	0.42173	0.68	0.781	0.0361254	Control	ASPH
ALDH2	3.02883e-06	0.643309	0.513	0.536	0.040971	Control	ALDH2
MT1X	7.05688e-106	1.2626	0.989	0.643	9.54584e-102	Part	MT1X
S100B	1.37457e-95	0.55298	1	0.997	1.85938e-91	Part	S100B
SPP1	4.67164e-84	3.50522	0.466	0.079	6.31933e-80	Part	SPP1
MT2A	3.88714e-67	0.518902	1	0.986	5.25813e-63	Part	MT2A
CPLX2	1.02997e-64	0.878314	0.909	0.567	1.39324e-60	Part	CPLX2
SERPINA3	1.07396e-64	2.47124	0.618	0.312	1.45275e-60	Part	SERPINA3
ACTB1	2.02473e-55	0.419438	1	0.997	2.73885e-51	Part	ACTB
PPDPF	2.18073e-36	1.00055	0.65	0.36	2.94987e-32	Part	PPDPF
IFITM3	2.10639e-34	1.01772	0.632	0.379	2.84931e-30	Part	IFITM3
CCL2	3.23434e-32	3.33626	0.175	0.017	4.37509e-28	Part	CCL2
PABPC1	1.97021e-29	0.803826	0.68	0.441	2.66511e-25	Part	PABPC1
NTRK2	2.68282e-28	0.310839	1	1	3.62906e-24	Part	NTRK2
CAMK2N1	3.65786e-28	0.746826	0.684	0.456	4.94799e-24	Part	CAMK2N1
MT1E	8.63795e-28	0.334418	0.995	0.93	1.16845e-23	Part	MT1E
SOD2	1.69834e-26	1.1502	0.52	0.316	2.29735e-22	Part	SOD2
SLC1A3	3.63304e-26	0.419655	0.998	0.99	4.91441e-22	Part	SLC1A3
COPS9	5.92467e-23	0.587202	0.779	0.522	8.01431e-19	Part	COPS9
YWHAQ	2.15437e-22	0.575696	0.746	0.526	2.91422e-18	Part	YWHAQ
CAMK2A	6.64968e-22	0.583688	0.766	0.525	8.99503e-18	Part	CAMK2A
CD63	1.81639e-21	0.691656	0.652	0.452	2.45703e-17	Part	CD63
MT31	3.59381e-21	0.317422	0.998	0.998	4.86135e-17	Part	MT3
CANX	4.79915e-21	0.865581	0.527	0.323	6.49182e-17	Part	CANX
CRYAB1	2.70329e-20	0.217794	1	0.991	3.65674e-16	Part	CRYAB
CD44	3.7962e-20	0.961686	0.598	0.423	5.13511e-16	Part	CD44
CNN3	1.35984e-19	0.51043	0.854	0.706	1.83946e-15	Part	CNN3
GABARAP	1.55245e-19	0.682766	0.616	0.433	2.10001e-15	Part	GABARAP
FTL	2.55561e-19	0.210711	1	0.993	3.45697e-15	Part	FTL
DTNA	3.1612e-19	0.274246	1	0.994	4.27615e-15	Part	DTNA
PON2	1.13167e-18	0.633133	0.67	0.471	1.53081e-14	Part	PON2
SPARCL1	1.84466e-18	0.367928	0.984	0.914	2.49528e-14	Part	SPARCL1
HTRA1	2.85184e-18	0.713141	0.568	0.382	3.85768e-14	Part	HTRA1
HPCAL4	1.38841e-17	1.21439	0.4	0.243	1.8781e-13	Part	HPCAL4
MGST1	9.74424e-17	0.660296	0.696	0.522	1.3181e-12	Part	MGST1
CSTB	1.23512e-16	0.894962	0.441	0.255	1.67075e-12	Part	CSTB
HOPX	1.96918e-16	0.560692	0.704	0.505	2.66371e-12	Part	HOPX
ATP5PD	5.20759e-16	0.696703	0.496	0.305	7.0443e-12	Part	ATP5PD
CHCHD21	6.11879e-15	0.461266	0.65	0.461	8.27689e-11	Part	CHCHD2
TOMM7	9.29503e-15	0.464174	0.671	0.49	1.25734e-10	Part	TOMM7
APP	2.16568e-14	0.332386	0.821	0.658	2.92951e-10	Part	APP
LYVE1	3.91173e-14	0.822034	0.343	0.169	5.2914e-10	Part	LYVE1
SEC11C	1.06487e-13	0.443746	0.716	0.526	1.44046e-09	Part	SEC11C
ATP13A4	1.10079e-13	0.8823	0.398	0.243	1.48903e-09	Part	ATP13A4
PFN2	1.41481e-13	0.936289	0.416	0.278	1.91382e-09	Part	PFN2
PFDN5	1.9204e-13	0.550629	0.562	0.393	2.59773e-09	Part	PFDN5
MRO	2.72272e-13	0.585211	0.584	0.404	3.68303e-09	Part	MRO
CALR	4.3883e-13	1.12406	0.336	0.199	5.93605e-09	Part	CALR
CLU1	4.52556e-13	0.104629	1	1	6.12172e-09	Part	CLU
SERINC1	5.13855e-13	0.707923	0.504	0.371	6.95091e-09	Part	SERINC1
DPP10	5.1965e-13	2.48088	0.127	0.036	7.02931e-09	Part	DPP10
C1orf611	1.08092e-12	0.345029	0.984	0.94	1.46216e-08	Part	C1orf61
ERC1	1.44988e-12	0.324668	0.839	0.663	1.96125e-08	Part	ERC1
TAGLN	8.50986e-12	2.94443	0.064	0.007	1.15113e-07	Part	TAGLN
JUNB	1.15174e-11	1.42509	0.211	0.095	1.55795e-07	Part	JUNB
SCAMP5	1.4112e-11	0.620176	0.504	0.368	1.90893e-07	Part	SCAMP5
ATP5MG	2.83494e-11	0.402251	0.609	0.438	3.83483e-07	Part	ATP5MG
OGA	2.87534e-11	0.479463	0.595	0.453	3.88948e-07	Part	OGA
TMED2	3.30889e-11	1.24545	0.246	0.128	4.47594e-07	Part	TMED2
MAP2	5.14823e-11	0.379975	0.68	0.522	6.96401e-07	Part	MAP2
FSTL3	6.46595e-11	1.29136	0.179	0.074	8.74649e-07	Part	FSTL3
RGR	9.79775e-11	1.79835	0.152	0.059	1.32534e-06	Part	RGR
SCD	1.17915e-10	0.330831	0.729	0.597	1.59503e-06	Part	SCD
GABRA2	1.24013e-10	0.406503	0.796	0.639	1.67753e-06	Part	GABRA2
C1R	2.675e-10	1.93997	0.105	0.03	3.61847e-06	Part	C1R
YY1AP1	3.46382e-10	0.289354	0.839	0.674	4.68551e-06	Part	YY1AP1
ITGB8	4.9693e-10	0.456338	0.582	0.432	6.72197e-06	Part	ITGB8
LRPAP1	6.32827e-10	0.859192	0.338	0.216	8.56026e-06	Part	LRPAP1
CCDC6	6.94036e-10	0.643075	0.412	0.277	9.38823e-06	Part	CCDC6
HIST1H4C	7.48632e-10	0.298272	0.693	0.538	1.01267e-05	Part	HIST1H4C
SCRG1	8.95931e-10	0.401695	0.643	0.507	1.21193e-05	Part	SCRG1
PNRC1	9.34809e-10	0.744333	0.366	0.242	1.26452e-05	Part	PNRC1
FGF2	1.32155e-09	0.614253	0.38	0.24	1.78766e-05	Part	FGF2
OCIAD1	1.67473e-09	0.286271	0.732	0.579	2.26541e-05	Part	OCIAD1
DLG2	1.7273e-09	1.06944	0.261	0.152	2.33652e-05	Part	DLG2
BCL6	2.08287e-09	0.452326	0.571	0.421	2.8175e-05	Part	BCL6
SNAP25	3.59553e-09	0.467866	0.564	0.472	4.86367e-05	Part	SNAP25
RAB5A	4.24941e-09	0.786703	0.357	0.245	5.74817e-05	Part	RAB5A
LGI11	4.57123e-09	0.308052	0.821	0.694	6.18351e-05	Part	LGI1
CLIC4	4.8099e-09	1.22907	0.234	0.133	6.50635e-05	Part	CLIC4
RAB18	4.90641e-09	0.981759	0.305	0.199	6.6369e-05	Part	RAB18
GTF3C6	5.29147e-09	0.554244	0.43	0.294	7.15777e-05	Part	GTF3C6
YWHAG	7.23587e-09	0.242196	0.832	0.669	9.78796e-05	Part	YWHAG
FOS	7.75147e-09	0.887533	0.236	0.125	0.000104854	Part	FOS
UCHL1	1.10123e-08	0.430451	0.577	0.478	0.000148963	Part	UCHL1
ANP32E	1.10407e-08	0.344502	0.604	0.445	0.000149347	Part	ANP32E
TPP1	1.24234e-08	0.537518	0.416	0.29	0.000168051	Part	TPP1
SLC7A111	1.25285e-08	0.309351	0.62	0.454	0.000169474	Part	SLC7A11
DGKB	1.32578e-08	1.05151	0.288	0.19	0.000179338	Part	DGKB
HNRNPC	1.47592e-08	0.212078	0.845	0.69	0.000199648	Part	HNRNPC
NUPR1	1.82813e-08	0.423662	0.577	0.436	0.000247292	Part	NUPR1
ATPAF1	1.89701e-08	0.908448	0.279	0.174	0.000256609	Part	ATPAF1
SEM1	2.04991e-08	0.425411	0.479	0.329	0.000277291	Part	SEM1
RASD1	2.81047e-08	0.546955	0.425	0.301	0.000380172	Part	RASD1
PAFAH1B1	2.93444e-08	0.52379	0.45	0.339	0.000396942	Part	PAFAH1B1
MKLN1	3.74062e-08	0.765178	0.338	0.229	0.000505994	Part	MKLN1
NPAS3	3.96891e-08	0.290161	0.834	0.693	0.000536874	Part	NPAS3
NKAIN3	4.37139e-08	0.697117	0.348	0.238	0.000591318	Part	NKAIN3
HILPDA	5.02214e-08	1.31566	0.212	0.123	0.000679344	Part	HILPDA
DCTN6	5.27838e-08	0.687759	0.334	0.22	0.000714007	Part	DCTN6
SCG31	8.16028e-08	0.317328	0.762	0.639	0.00110384	Part	SCG3
ACBD7	8.24047e-08	0.323577	0.757	0.613	0.00111469	Part	ACBD7
KIF5A	9.611e-08	0.390474	0.561	0.456	0.00130008	Part	KIF5A
COX6B1	1.22168e-07	0.272244	0.634	0.501	0.00165257	Part	COX6B1
ATP6V1H	1.22631e-07	0.376395	0.525	0.415	0.00165883	Part	ATP6V1H
COMT	1.24298e-07	0.531708	0.425	0.317	0.00168139	Part	COMT
SNX3	1.31507e-07	0.410328	0.516	0.411	0.0017789	Part	SNX3
PSD3	1.60505e-07	0.263496	0.659	0.507	0.00217115	Part	PSD3
SLC44A2	1.66558e-07	0.912695	0.279	0.181	0.00225303	Part	SLC44A2
MDH1	1.8146e-07	0.618021	0.33	0.219	0.00245461	Part	MDH1
PCBP2	1.93077e-07	0.381846	0.468	0.339	0.00261175	Part	PCBP2
ATP5ME	2.44963e-07	0.206789	0.693	0.565	0.00331362	Part	ATP5ME
WBP2	2.5072e-07	0.205343	0.791	0.653	0.0033915	Part	WBP2
NPTXR	2.63103e-07	0.701315	0.4	0.328	0.003559	Part	NPTXR
RHBDD2	3.04066e-07	0.351278	0.511	0.398	0.00411309	Part	RHBDD2
TNNT1	3.51764e-07	0.872998	0.234	0.141	0.00475831	Part	TNNT1
HACD3	5.45926e-07	0.251297	0.602	0.434	0.00738474	Part	HACD3
N4BP2L2	5.76227e-07	0.313648	0.561	0.452	0.00779462	Part	N4BP2L2
BRK1	6.42274e-07	0.919665	0.291	0.204	0.00868805	Part	BRK1
COPZ1	7.8591e-07	0.622332	0.327	0.221	0.010631	Part	COPZ1
DOCK7	1.09778e-06	0.863581	0.227	0.139	0.0148496	Part	DOCK7
ATP5IF1	1.11426e-06	0.261244	0.588	0.478	0.0150726	Part	ATP5IF1
RBX1	1.22122e-06	0.689336	0.302	0.206	0.0165194	Part	RBX1
LRRC3B1	1.33174e-06	0.53984	0.277	0.174	0.0180144	Part	LRRC3B
SLIRP	1.39431e-06	0.295562	0.47	0.339	0.0188608	Part	SLIRP
UBE2I	1.42204e-06	0.921505	0.236	0.152	0.019236	Part	UBE2I
ADIRF	1.50286e-06	0.493637	0.436	0.348	0.0203292	Part	ADIRF
CCNI	1.82482e-06	0.205373	0.721	0.609	0.0246843	Part	CCNI
ETNPPL	2.12247e-06	0.34657	0.829	0.739	0.0287106	Part	ETNPPL
TGFB2	2.1645e-06	0.599941	0.321	0.229	0.0292792	Part	TGFB2
NF1	2.2653e-06	1.57444	0.112	0.051	0.0306427	Part	NF1
ATP6V0A1	2.57299e-06	0.386231	0.468	0.37	0.0348048	Part	ATP6V0A1
SLC14A1	2.73276e-06	0.455122	0.429	0.329	0.0369661	Part	SLC14A1
IDI1	2.99382e-06	0.552298	0.307	0.211	0.0404974	Part	IDI1
PARK7	3.3586e-06	0.21258	0.664	0.554	0.0454318	Part	PARK7
TMBIM1	3.64937e-06	0.787144	0.264	0.18	0.049365	Part	TMBIM1
COMMD6	3.67547e-06	1.30413	0.139	0.072	0.0497181	Part	COMMD6
SHANK1	4.48873e-73	2.36759	0.482	0.081	6.0719e-69	AD	SHANK1
TNK2	3.54863e-66	4.90961	0.265	0.007	4.80024e-62	AD	TNK2
SPARC	4.42192e-66	0.797559	0.98	0.757	5.98153e-62	AD	SPARC
TP53INP2	6.46426e-62	2.40708	0.353	0.04	8.7442e-58	AD	TP53INP2
NOP53	1.02604e-58	3.14173	0.295	0.024	1.38793e-54	AD	NOP53
SOWAHA	1.04696e-58	3.33525	0.285	0.022	1.41622e-54	AD	SOWAHA
AGAP2	5.52165e-57	2.46444	0.371	0.056	7.46914e-53	AD	AGAP2
ZCCHC24	8.12845e-57	2.03005	0.378	0.058	1.09954e-52	AD	ZCCHC24
SDC3	4.10265e-56	1.88673	0.44	0.089	5.54966e-52	AD	SDC3
CNIH2	4.26327e-56	1.92187	0.444	0.09	5.76692e-52	AD	CNIH2
NCOR2	6.07101e-56	2.37847	0.331	0.04	8.21226e-52	AD	NCOR2
EPN1	1.27093e-50	1.90653	0.367	0.063	1.71919e-46	AD	EPN1
B3GAT1	1.48817e-50	1.55171	0.426	0.089	2.01304e-46	AD	B3GAT1
DLGAP4	1.62694e-50	2.80627	0.273	0.027	2.20076e-46	AD	DLGAP4
KIF1C	2.87454e-50	1.83492	0.373	0.066	3.88839e-46	AD	KIF1C
DDN	4.05674e-49	2.49768	0.299	0.038	5.48755e-45	AD	DDN
TNS2	3.52892e-48	2.92054	0.249	0.022	4.77357e-44	AD	TNS2
TXNIP	1.92976e-47	2.19436	0.331	0.055	2.61039e-43	AD	TXNIP
NLGN2	6.76451e-47	1.66889	0.386	0.079	9.15035e-43	AD	NLGN2
ZBTB7A	3.07454e-45	1.23421	0.508	0.142	4.15893e-41	AD	ZBTB7A
GIT1	4.08731e-45	1.23726	0.5	0.136	5.5289e-41	AD	GIT1
RGCC	8.82005e-45	2.41832	0.267	0.032	1.19309e-40	AD	RGCC
FBXL16	1.0155e-44	1.26524	0.496	0.136	1.37367e-40	AD	FBXL16
BSG	1.32301e-44	0.972642	0.827	0.343	1.78963e-40	AD	BSG
TNS1	5.90678e-44	3.47938	0.211	0.015	7.99011e-40	AD	TNS1
ATXN1	1.52262e-43	1.45582	0.406	0.095	2.05964e-39	AD	ATXN1
ULK1	3.20383e-43	1.85649	0.307	0.05	4.33382e-39	AD	ULK1
PHYHIP	4.66115e-43	1.85972	0.351	0.07	6.30514e-39	AD	PHYHIP
MLLT6	1.01036e-42	1.47082	0.394	0.09	1.36672e-38	AD	MLLT6
BTBD2	4.67646e-42	1.47867	0.422	0.108	6.32585e-38	AD	BTBD2
ZNF358	5.46195e-42	1.08181	0.588	0.189	7.38838e-38	AD	ZNF358
DVL1	6.48253e-42	1.65785	0.341	0.068	8.76892e-38	AD	DVL1
MAPK3	9.42254e-42	2.21189	0.265	0.036	1.27459e-37	AD	MAPK3
CCND3	8.12171e-41	1.95177	0.275	0.041	1.09862e-36	AD	CCND3
CNP	4.75263e-40	2.25361	0.269	0.041	6.42888e-36	AD	CNP
WSB2	1.5033e-37	1.37177	0.386	0.099	2.03352e-33	AD	WSB2
MTURN	1.22697e-36	0.528502	0.992	0.861	1.65972e-32	AD	MTURN
CYB5R3	1.78534e-36	1.63164	0.319	0.07	2.41503e-32	AD	CYB5R3
MFSD11	4.0671e-36	2.35931	0.237	0.036	5.50157e-32	AD	MFSD11
EFHD1	8.20271e-36	0.987075	0.608	0.224	1.10958e-31	AD	EFHD1
CSNK1G2	4.83667e-35	1.33972	0.341	0.082	6.54257e-31	AD	CSNK1G2
CASKIN1	3.30517e-34	1.02501	0.442	0.136	4.47091e-30	AD	CASKIN1
ZMIZ2	4.39379e-34	0.896705	0.534	0.18	5.94348e-30	AD	ZMIZ2
CRIP2	5.72657e-34	3.32667	0.171	0.014	7.74633e-30	AD	CRIP2
TJP1	6.61467e-34	1.04544	0.494	0.161	8.94767e-30	AD	TJP1
ZEB2	9.64659e-34	2.76941	0.179	0.017	1.30489e-29	AD	ZEB2
GRAMD1B	1.4218e-33	1.4099	0.355	0.095	1.92327e-29	AD	GRAMD1B
KCNQ2	3.5185e-33	3.90441	0.149	0.008	4.75947e-29	AD	KCNQ2
MAP3K10	3.53026e-33	2.13569	0.215	0.03	4.77538e-29	AD	MAP3K10
GUK1	1.39665e-32	1.08792	0.424	0.129	1.88925e-28	AD	GUK1
PHACTR1	2.27197e-32	1.64888	0.287	0.063	3.0733e-28	AD	PHACTR1
KIF5B	8.33449e-32	1.87327	0.239	0.043	1.12741e-27	AD	KIF5B
LRRC4B	9.47913e-32	1.50996	0.275	0.058	1.28224e-27	AD	LRRC4B
SRSF2	1.22009e-31	2.80765	0.179	0.02	1.65041e-27	AD	SRSF2
GSTP1	1.28991e-31	2.99338	0.165	0.015	1.74486e-27	AD	GSTP1
SKI	2.90975e-31	2.40039	0.177	0.019	3.93602e-27	AD	SKI
NPDC1	3.87756e-31	2.31736	0.201	0.029	5.24517e-27	AD	NPDC1
ANKRD40	7.86884e-31	2.9746	0.157	0.013	1.06442e-26	AD	ANKRD40
KIF3C	1.70111e-30	1.99529	0.225	0.04	2.30109e-26	AD	KIF3C
PTMS	1.91187e-30	0.937229	0.478	0.164	2.58619e-26	AD	PTMS
CA11	3.25415e-30	0.995144	0.472	0.162	4.40189e-26	AD	CA11
FAM107A	1.00192e-29	0.351272	0.996	0.995	1.3553e-25	AD	FAM107A
PHF10	1.28089e-29	2.13371	0.193	0.028	1.73265e-25	AD	PHF10
PACS2	1.58051e-29	0.914342	0.492	0.176	2.13796e-25	AD	PACS2
PLPPR2	2.2067e-29	0.924694	0.454	0.154	2.985e-25	AD	PLPPR2
SLC17A7	2.98342e-29	1.14765	0.42	0.136	4.03568e-25	AD	SLC17A7
TBC1D9B	5.75726e-29	1.73978	0.263	0.061	7.78785e-25	AD	TBC1D9B
DEAF1	6.22051e-29	0.821579	0.532	0.202	8.41448e-25	AD	DEAF1
SAMD4B	8.88261e-29	1.48444	0.233	0.045	1.20155e-24	AD	SAMD4B
NRXN2	9.47068e-29	1.08437	0.353	0.103	1.2811e-24	AD	NRXN2
MAPK8IP1	2.242e-28	1.13365	0.371	0.115	3.03275e-24	AD	MAPK8IP1
NACC2	2.48104e-28	1.58871	0.235	0.048	3.3561e-24	AD	NACC2
RABL6	3.44746e-28	0.882972	0.456	0.157	4.66338e-24	AD	RABL6
MAPK8IP2	4.66683e-28	0.828753	0.482	0.174	6.31282e-24	AD	MAPK8IP2
TRIM44	6.84267e-28	1.63982	0.229	0.046	9.25608e-24	AD	TRIM44
MAPK8IP3	7.65115e-28	1.08126	0.351	0.105	1.03497e-23	AD	MAPK8IP3
ARHGEF25	1.01388e-27	1.30053	0.319	0.089	1.37147e-23	AD	ARHGEF25
EVL	1.50153e-27	2.30731	0.173	0.023	2.03113e-23	AD	EVL
ALDOC	1.52671e-27	4.09311	0.12	0.005	2.06518e-23	AD	ALDOC
PFKL	1.53477e-27	1.07275	0.361	0.112	2.07609e-23	AD	PFKL
PRRC2A	1.95895e-27	1.09786	0.331	0.096	2.64987e-23	AD	PRRC2A
LMTK3	2.16381e-27	0.942486	0.375	0.119	2.92698e-23	AD	LMTK3
ITPK1	3.703e-27	0.693967	0.598	0.248	5.00904e-23	AD	ITPK1
ID3	3.81793e-27	1.56886	0.267	0.066	5.16452e-23	AD	ID3
AGAP3	4.00742e-27	1.08292	0.321	0.089	5.42084e-23	AD	AGAP3
YWHAH	4.57559e-27	1.08981	0.363	0.113	6.1894e-23	AD	YWHAH
PPP6R1	4.8629e-27	2.14375	0.175	0.025	6.57805e-23	AD	PPP6R1
METRN1	5.45105e-27	0.838838	0.486	0.192	7.37363e-23	AD	METRN
MAZ	6.6813e-27	1.64158	0.223	0.045	9.03779e-23	AD	MAZ
RNF208	7.418e-27	1.23562	0.275	0.069	1.00343e-22	AD	RNF208
PDXP	8.49459e-27	1.94227	0.185	0.03	1.14906e-22	AD	PDXP
FBXL19	9.17282e-27	3.88203	0.114	0.004	1.24081e-22	AD	FBXL19
ZNF385A1	1.32842e-26	0.974892	0.289	0.076	1.79695e-22	AD	ZNF385A
CTSB	2.2325e-26	1.20687	0.335	0.103	3.01991e-22	AD	CTSB
NFE2L1	2.26069e-26	0.850016	0.518	0.204	3.05803e-22	AD	NFE2L1
CTNNB1	2.63963e-26	1.54659	0.257	0.064	3.57063e-22	AD	CTNNB1
MLLT1	3.19716e-26	2.76894	0.139	0.013	4.3248e-22	AD	MLLT1
PREX1	3.75346e-26	0.971872	0.349	0.108	5.07731e-22	AD	PREX1
MARCKSL1	1.00042e-25	1.90428	0.201	0.038	1.35327e-21	AD	MARCKSL1
KCNAB2	1.03256e-25	1.19479	0.335	0.103	1.39675e-21	AD	KCNAB2
ABAT	1.04065e-25	0.863113	0.416	0.146	1.40769e-21	AD	ABAT
ITGB5	1.74003e-25	1.34518	0.219	0.046	2.35374e-21	AD	ITGB5
MGLL	1.94017e-25	3.78809	0.112	0.005	2.62447e-21	AD	MGLL
SF1	2.5294e-25	1.22718	0.275	0.073	3.42152e-21	AD	SF1
DMWD	3.35867e-25	1.83396	0.187	0.033	4.54327e-21	AD	DMWD
ANP32B	3.35997e-25	2.17769	0.169	0.026	4.54503e-21	AD	ANP32B
TCF4	3.54901e-25	2.62069	0.137	0.014	4.80075e-21	AD	TCF4
CEP170B	3.5911e-25	1.23086	0.263	0.067	4.85768e-21	AD	CEP170B
HSPA2	3.73958e-25	1.38738	0.273	0.075	5.05853e-21	AD	HSPA2
FRA10AC1	7.30206e-25	1.73561	0.189	0.035	9.8775e-21	AD	FRA10AC1
DBN1	8.00593e-25	3.2249	0.125	0.01	1.08296e-20	AD	DBN1
KCNN1	1.1548e-24	0.825102	0.394	0.136	1.5621e-20	AD	KCNN1
UBE2H	1.18413e-24	1.55185	0.221	0.05	1.60178e-20	AD	UBE2H
PURA	1.22205e-24	1.78519	0.175	0.029	1.65306e-20	AD	PURA
KIAA1671	1.86839e-24	0.988135	0.331	0.106	2.52736e-20	AD	KIAA1671
MCRIP1	2.16657e-24	1.15999	0.265	0.07	2.93071e-20	AD	MCRIP1
ACAP3	2.28286e-24	1.51092	0.225	0.051	3.08802e-20	AD	ACAP3
MAP4K4	4.24575e-24	0.851083	0.46	0.181	5.74322e-20	AD	MAP4K4
SH3BP2	4.76036e-24	2.42034	0.11	0.006	6.43934e-20	AD	SH3BP2
NUMA1	4.85043e-24	0.981788	0.315	0.097	6.56118e-20	AD	NUMA1
BHLHE41	7.40852e-24	1.69545	0.171	0.029	1.00215e-19	AD	BHLHE41
SET	7.65941e-24	0.932725	0.402	0.148	1.03609e-19	AD	SET
DOCK1	8.85541e-24	3.15062	0.122	0.01	1.19787e-19	AD	DOCK1
PKD1	8.95095e-24	0.751645	0.496	0.2	1.21079e-19	AD	PKD1
DYNC1LI2	1.10605e-23	0.757634	0.466	0.18	1.49615e-19	AD	DYNC1LI2
C18orf32	1.30533e-23	1.51457	0.249	0.067	1.76572e-19	AD	C18orf32
DNAJC5	1.72956e-23	1.41584	0.211	0.047	2.33958e-19	AD	DNAJC5
PLEKHM2	1.79681e-23	1.59359	0.185	0.036	2.43055e-19	AD	PLEKHM2
LRP3	2.09414e-23	1.63434	0.187	0.036	2.83274e-19	AD	LRP3
LENG8	2.42553e-23	0.938044	0.349	0.117	3.28101e-19	AD	LENG8
CDC42EP4	3.3662e-23	0.787158	0.514	0.223	4.55346e-19	AD	CDC42EP4
BAG6	3.96401e-23	1.32847	0.235	0.059	5.36211e-19	AD	BAG6
AJM1	5.01413e-23	1.01992	0.303	0.094	6.78261e-19	AD	AJM1
SERBP1	5.23579e-23	1.31474	0.245	0.065	7.08245e-19	AD	SERBP1
GSTM3	6.04268e-23	1.04896	0.365	0.134	8.17393e-19	AD	GSTM3
FBXO41	7.43138e-23	4.15826	0.096	0.003	1.00524e-18	AD	FBXO41
SRSF11	8.45752e-23	1.39845	0.217	0.051	1.14405e-18	AD	SRSF11
MAP2K2	8.46818e-23	1.32296	0.253	0.07	1.14549e-18	AD	MAP2K2
GRIK5	8.62012e-23	1.51921	0.223	0.056	1.16604e-18	AD	GRIK5
EPB41L2	1.02149e-22	2.98065	0.12	0.011	1.38177e-18	AD	EPB41L2
NCK2	1.0538e-22	2.75837	0.129	0.015	1.42548e-18	AD	NCK2
ACTR1B	1.07048e-22	1.36763	0.235	0.061	1.44804e-18	AD	ACTR1B
RSRP1	1.50037e-22	0.826011	0.351	0.12	2.02956e-18	AD	RSRP1
KIF21B	1.72134e-22	2.52356	0.131	0.016	2.32846e-18	AD	KIF21B
TSC22D1	2.11505e-22	1.64484	0.175	0.033	2.86102e-18	AD	TSC22D1
BRI3	2.11774e-22	1.18724	0.261	0.075	2.86467e-18	AD	BRI3
ANKRD11	2.44217e-22	1.4352	0.229	0.059	3.30352e-18	AD	ANKRD11
CRKL	2.74067e-22	0.977716	0.293	0.089	3.70731e-18	AD	CRKL
SUN2	3.13813e-22	0.837037	0.426	0.167	4.24495e-18	AD	SUN2
CREBZF	3.26636e-22	1.7692	0.161	0.028	4.4184e-18	AD	CREBZF
NCL	3.36714e-22	1.12269	0.299	0.095	4.55473e-18	AD	NCL
SMG1	3.8467e-22	2.32994	0.143	0.021	5.20343e-18	AD	SMG1
ACBD5	5.28259e-22	3.26409	0.112	0.01	7.14576e-18	AD	ACBD5
ZDHHC8	5.46181e-22	1.60255	0.167	0.03	7.38819e-18	AD	ZDHHC8
GPAA1	5.47079e-22	2.36722	0.127	0.015	7.40034e-18	AD	GPAA1
NBL1	6.02535e-22	1.39098	0.201	0.045	8.1505e-18	AD	NBL1
R3HDM2	6.5994e-22	1.67613	0.183	0.038	8.927e-18	AD	R3HDM2
SEC62	7.19622e-22	0.776552	0.446	0.178	9.73433e-18	AD	SEC62
DTX3	7.88347e-22	0.805104	0.382	0.142	1.0664e-17	AD	DTX3
SAMD4A	8.23445e-22	0.978184	0.263	0.077	1.11387e-17	AD	SAMD4A
WAC	9.03966e-22	0.948398	0.357	0.128	1.22279e-17	AD	WAC
GNAI2	1.05279e-21	1.57591	0.179	0.036	1.42411e-17	AD	GNAI2
SMOX	1.06049e-21	0.752097	0.522	0.235	1.43453e-17	AD	SMOX
KCTD15	1.19671e-21	1.28082	0.243	0.068	1.61878e-17	AD	KCTD15
CTSF	1.33878e-21	0.95622	0.299	0.096	1.81096e-17	AD	CTSF
RUNDC3A	1.41338e-21	0.700875	0.484	0.199	1.91188e-17	AD	RUNDC3A
ENC1	1.60496e-21	2.21872	0.145	0.023	2.17103e-17	AD	ENC1
MAST3	1.97663e-21	3.17008	0.102	0.007	2.67378e-17	AD	MAST3
TMCC2	2.06826e-21	0.630422	0.608	0.275	2.79774e-17	AD	TMCC2
NBR1	2.49263e-21	1.79195	0.169	0.033	3.37178e-17	AD	NBR1
TIMP3	2.60949e-21	0.831976	0.371	0.138	3.52986e-17	AD	TIMP3
MOB1B	2.88655e-21	0.904038	0.349	0.127	3.90463e-17	AD	MOB1B
EFR3B	3.93294e-21	0.753406	0.351	0.126	5.32008e-17	AD	EFR3B
PSD	4.2016e-21	0.575968	0.631	0.286	5.68351e-17	AD	PSD
ITPR2	4.48724e-21	1.27934	0.171	0.034	6.06988e-17	AD	ITPR2
GRHPR	5.73445e-21	1.57404	0.205	0.051	7.75699e-17	AD	GRHPR
CTXN11	7.20098e-21	0.757197	0.554	0.249	9.74077e-17	AD	CTXN1
SNCA	7.45901e-21	1.82264	0.179	0.039	1.00898e-16	AD	SNCA
HDGFL3	7.73912e-21	1.73865	0.169	0.034	1.04687e-16	AD	HDGFL3
ARF3	8.19265e-21	1.52973	0.185	0.041	1.10822e-16	AD	ARF3
RASSF4	8.35936e-21	0.978504	0.369	0.143	1.13077e-16	AD	RASSF4
HAGH	8.95587e-21	0.740036	0.42	0.169	1.21146e-16	AD	HAGH
VPS53	9.44211e-21	0.826692	0.329	0.115	1.27723e-16	AD	VPS53
TAF15	9.79205e-21	0.675383	0.458	0.188	1.32457e-16	AD	TAF15
WWOX	1.08701e-20	0.857855	0.299	0.101	1.47039e-16	AD	WWOX
CASC3	1.14921e-20	0.972585	0.329	0.118	1.55454e-16	AD	CASC3
WDFY3	1.19373e-20	1.4183	0.199	0.048	1.61477e-16	AD	WDFY3
SAMD1	1.41609e-20	2.67249	0.114	0.012	1.91555e-16	AD	SAMD1
ABHD2	2.12991e-20	1.4859	0.187	0.043	2.88112e-16	AD	ABHD2
HNRNPH1	2.19555e-20	2.30794	0.131	0.019	2.96992e-16	AD	HNRNPH1
GPR137	2.20182e-20	2.28452	0.114	0.012	2.9784e-16	AD	GPR137
CCNL2	2.79665e-20	0.69303	0.446	0.185	3.78303e-16	AD	CCNL2
SYNM	2.94903e-20	0.832517	0.339	0.123	3.98916e-16	AD	SYNM
SUPT5H	2.97146e-20	0.655453	0.46	0.192	4.01949e-16	AD	SUPT5H
PPP3CB	3.28475e-20	0.574116	0.406	0.158	4.44329e-16	AD	PPP3CB
PAFAH1B2	3.67048e-20	2.0108	0.137	0.022	4.96506e-16	AD	PAFAH1B2
PANX2	3.85342e-20	2.85412	0.11	0.011	5.21253e-16	AD	PANX2
BSN	3.90532e-20	2.71278	0.108	0.01	5.28273e-16	AD	BSN
OPTN	3.96476e-20	1.02675	0.235	0.066	5.36314e-16	AD	OPTN
C31	3.98739e-20	0.735905	0.367	0.142	5.39375e-16	AD	C3
SF3B2	4.87269e-20	1.53275	0.187	0.044	6.59129e-16	AD	SF3B2
MTA1	5.02356e-20	1.32589	0.209	0.055	6.79537e-16	AD	MTA1
SRSF1	5.33381e-20	2.94283	0.102	0.009	7.21504e-16	AD	SRSF1
CRLF1	5.46076e-20	2.30023	0.137	0.023	7.38677e-16	AD	CRLF1
ABHD8	5.74506e-20	0.619869	0.378	0.145	7.77134e-16	AD	ABHD8
ARHGEF40	5.87749e-20	1.40237	0.163	0.033	7.95048e-16	AD	ARHGEF40
PPP1R12C	6.02565e-20	0.574052	0.578	0.262	8.15089e-16	AD	PPP1R12C
SCAF1	6.84791e-20	2.04358	0.127	0.018	9.26317e-16	AD	SCAF1
GOLGB1	7.312e-20	0.960239	0.299	0.102	9.89094e-16	AD	GOLGB1
TAOK2	7.49291e-20	2.03881	0.125	0.017	1.01357e-15	AD	TAOK2
LSS	7.92363e-20	2.23896	0.137	0.023	1.07183e-15	AD	LSS
CAMTA2	8.45639e-20	1.79293	0.159	0.032	1.1439e-15	AD	CAMTA2
FAM171A2	8.96933e-20	2.02544	0.147	0.027	1.21328e-15	AD	FAM171A2
EIF4G2	9.51931e-20	1.0356	0.265	0.083	1.28768e-15	AD	EIF4G2
TOLLIP	1.0915e-19	0.899587	0.293	0.098	1.47647e-15	AD	TOLLIP
ZBTB20	1.59754e-19	0.754292	0.384	0.154	2.161e-15	AD	ZBTB20
TNRC6A	1.84245e-19	0.884572	0.273	0.089	2.49228e-15	AD	TNRC6A
WIPI2	1.84519e-19	2.14975	0.125	0.018	2.49599e-15	AD	WIPI2
TMEM129	2.00129e-19	2.09884	0.127	0.019	2.70715e-15	AD	TMEM129
ARRDC4	2.58525e-19	0.998561	0.309	0.112	3.49707e-15	AD	ARRDC4
IDH2	2.99664e-19	0.441573	0.52	0.231	4.05355e-15	AD	IDH2
ARID1A	3.06705e-19	0.618019	0.361	0.138	4.1488e-15	AD	ARID1A
ARID1B	3.48365e-19	1.39766	0.197	0.051	4.71234e-15	AD	ARID1B
CASTOR1	3.48672e-19	1.78681	0.133	0.022	4.71649e-15	AD	CASTOR1
TUFM	3.67598e-19	1.53001	0.165	0.036	4.9725e-15	AD	TUFM
FAM219A	3.68698e-19	1.95513	0.141	0.025	4.98737e-15	AD	FAM219A
SOX21	3.70513e-19	1.98759	0.141	0.025	5.01193e-15	AD	SOX21
SENP6	3.77107e-19	0.743046	0.333	0.121	5.10112e-15	AD	SENP6
DCAF8	4.53133e-19	1.4843	0.185	0.046	6.12953e-15	AD	DCAF8
CHMP4B	4.54074e-19	0.675809	0.402	0.162	6.14226e-15	AD	CHMP4B
JPH4	4.65114e-19	1.72847	0.147	0.028	6.29159e-15	AD	JPH4
WDTC1	5.02026e-19	1.22459	0.185	0.045	6.79091e-15	AD	WDTC1
MAP7D1	5.0425e-19	0.753026	0.343	0.127	6.82099e-15	AD	MAP7D1
KTN1	5.05795e-19	1.74907	0.153	0.03	6.8419e-15	AD	KTN1
FASN	5.40902e-19	0.845366	0.259	0.083	7.31678e-15	AD	FASN
VEGFB	5.61876e-19	1.48684	0.141	0.025	7.60049e-15	AD	VEGFB
ZFR	5.84599e-19	0.96771	0.281	0.096	7.90787e-15	AD	ZFR
DNM1	6.35054e-19	2.13949	0.131	0.022	8.59037e-15	AD	DNM1
CTBP1	6.73032e-19	0.612549	0.369	0.142	9.1041e-15	AD	CTBP1
CBX6	6.97025e-19	0.572806	0.685	0.352	9.42866e-15	AD	CBX6
AP2B1	7.62497e-19	1.01988	0.261	0.085	1.03143e-14	AD	AP2B1
ZFAND3	8.31797e-19	1.89467	0.131	0.022	1.12517e-14	AD	ZFAND3
NACC1	9.33559e-19	2.25868	0.114	0.015	1.26283e-14	AD	NACC1
AKAP9	1.01212e-18	1.58991	0.173	0.041	1.36909e-14	AD	AKAP9
SHISA4	1.03176e-18	0.85812	0.303	0.109	1.39566e-14	AD	SHISA4
TNPO2	1.08841e-18	0.972319	0.231	0.069	1.47229e-14	AD	TNPO2
SOBP	1.14771e-18	1.11597	0.217	0.062	1.55251e-14	AD	SOBP
SLC41A1	1.20194e-18	0.962407	0.201	0.054	1.62587e-14	AD	SLC41A1
RNF157	1.21366e-18	0.899648	0.253	0.08	1.64172e-14	AD	RNF157
MTUS1	1.22743e-18	1.3276	0.201	0.055	1.66034e-14	AD	MTUS1
NPTXR1	1.5491e-18	0.604909	0.57	0.258	2.09547e-14	AD	NPTXR
GPR162	1.57079e-18	2.90652	0.096	0.009	2.12481e-14	AD	GPR162
STK11	1.60449e-18	1.99459	0.118	0.017	2.1704e-14	AD	STK11
ABCA2	1.63331e-18	0.952123	0.241	0.074	2.20938e-14	AD	ABCA2
LMO4	1.68076e-18	0.835341	0.283	0.096	2.27357e-14	AD	LMO4
PTOV1	1.86325e-18	0.607475	0.436	0.188	2.52042e-14	AD	PTOV1
ATP5MC3	2.02266e-18	1.24868	0.211	0.061	2.73605e-14	AD	ATP5MC3
LY6H	2.03197e-18	1.05516	0.299	0.109	2.74865e-14	AD	LY6H
PTTG1IP	2.07902e-18	0.781838	0.343	0.133	2.8123e-14	AD	PTTG1IP
SYNE1	2.35512e-18	0.764073	0.361	0.142	3.18577e-14	AD	SYNE1
MPRIP	2.41214e-18	1.03481	0.207	0.057	3.2629e-14	AD	MPRIP
INF2	2.5406e-18	3.1332	0.09	0.007	3.43667e-14	AD	INF2
ASH1L	2.55515e-18	1.57181	0.157	0.034	3.45636e-14	AD	ASH1L
RNF130	2.64034e-18	1.68488	0.167	0.039	3.57159e-14	AD	RNF130
CCM2	2.82232e-18	2.70617	0.1	0.01	3.81776e-14	AD	CCM2
C11orf95	2.8274e-18	1.65506	0.139	0.026	3.82462e-14	AD	C11orf95
BTBD7	3.54989e-18	1.03627	0.255	0.084	4.80194e-14	AD	BTBD7
ZNF219	3.55823e-18	1.7012	0.131	0.023	4.81322e-14	AD	ZNF219
CCDC106	4.4187e-18	1.23411	0.173	0.042	5.97717e-14	AD	CCDC106
ACOT7	5.16559e-18	0.671415	0.343	0.129	6.98749e-14	AD	ACOT7
PRRC2C	5.40914e-18	0.567041	0.424	0.178	7.31694e-14	AD	PRRC2C
MFN2	5.54058e-18	1.97161	0.124	0.02	7.49474e-14	AD	MFN2
ASAH1	5.77406e-18	0.960504	0.285	0.103	7.81057e-14	AD	ASAH1
MYO10	5.78905e-18	0.871153	0.253	0.082	7.83084e-14	AD	MYO10
RNF11	5.85446e-18	0.821703	0.311	0.115	7.91933e-14	AD	RNF11
MCL1	6.14366e-18	1.32944	0.181	0.046	8.31052e-14	AD	MCL1
TMEM259	6.40455e-18	0.951873	0.235	0.073	8.66344e-14	AD	TMEM259
SASH1	6.50231e-18	0.68971	0.271	0.091	8.79568e-14	AD	SASH1
ZNF846	6.55365e-18	3.30949	0.08	0.004	8.86512e-14	AD	ZNF846
RYR1	6.55932e-18	2.098	0.106	0.013	8.87279e-14	AD	RYR1
DOCK41	7.08291e-18	0.511755	0.44	0.191	9.58105e-14	AD	DOCK4
TRIP6	8.87091e-18	1.26779	0.165	0.039	1.19997e-13	AD	TRIP6
RAB13	1.02412e-17	4.25133	0.076	0.003	1.38533e-13	AD	RAB13
PLXDC2	1.0813e-17	3.20277	0.082	0.005	1.46267e-13	AD	PLXDC2
VSIR	1.11919e-17	1.52242	0.161	0.037	1.51393e-13	AD	VSIR
BBX	1.23874e-17	1.3312	0.167	0.04	1.67564e-13	AD	BBX
ECHDC2	1.24007e-17	1.02198	0.279	0.101	1.67744e-13	AD	ECHDC2
OAZ2	1.33759e-17	0.668585	0.347	0.136	1.80935e-13	AD	OAZ2
VEGFA	1.36605e-17	0.890354	0.243	0.078	1.84785e-13	AD	VEGFA
CCND2	1.44318e-17	2.44637	0.102	0.012	1.95219e-13	AD	CCND2
CELF1	1.46702e-17	0.711106	0.376	0.156	1.98444e-13	AD	CELF1
KAT2B	1.48794e-17	1.39261	0.185	0.05	2.01273e-13	AD	KAT2B
RHOU	1.5598e-17	1.96298	0.131	0.024	2.10994e-13	AD	RHOU
PPM1A	1.56392e-17	1.52903	0.157	0.036	2.11552e-13	AD	PPM1A
HIF3A1	1.64709e-17	0.521165	0.566	0.281	2.22802e-13	AD	HIF3A
DACT3	1.65503e-17	1.07198	0.211	0.063	2.23875e-13	AD	DACT3
FUS	1.6786e-17	0.884338	0.297	0.109	2.27064e-13	AD	FUS
YTHDC1	1.87312e-17	1.53809	0.153	0.034	2.53377e-13	AD	YTHDC1
DAB2IP	2.1903e-17	2.65365	0.094	0.01	2.96282e-13	AD	DAB2IP
PSIP1	2.27092e-17	1.26846	0.207	0.062	3.07187e-13	AD	PSIP1
BRSK1	2.60503e-17	0.711765	0.347	0.137	3.52382e-13	AD	BRSK1
PCDH10	2.61911e-17	1.66288	0.127	0.023	3.54287e-13	AD	PCDH10
MFHAS1	2.88172e-17	1.17242	0.179	0.047	3.8981e-13	AD	MFHAS1
CAPS	3.13618e-17	0.862033	0.406	0.184	4.24231e-13	AD	CAPS
DEXI	3.24915e-17	2.10084	0.116	0.018	4.39512e-13	AD	DEXI
PLEKHO2	3.60018e-17	1.26158	0.199	0.058	4.86996e-13	AD	PLEKHO2
ARGLU1	3.6126e-17	0.498421	0.574	0.276	4.88676e-13	AD	ARGLU1
ATXN7L3B	3.6998e-17	0.848589	0.269	0.094	5.00471e-13	AD	ATXN7L3B
TRAK2	3.97115e-17	2.03912	0.116	0.018	5.37178e-13	AD	TRAK2
CSNK1D	4.24425e-17	1.66207	0.143	0.03	5.7412e-13	AD	CSNK1D
EEF1A2	4.46844e-17	0.564176	0.508	0.231	6.04445e-13	AD	EEF1A2
PNPLA2	4.52937e-17	1.38943	0.179	0.048	6.12688e-13	AD	PNPLA2
TUBG2	4.61229e-17	1.96624	0.125	0.023	6.23905e-13	AD	TUBG2
MTFR1L	5.48094e-17	0.88695	0.243	0.081	7.41407e-13	AD	MTFR1L
SF3B1	5.72788e-17	1.07618	0.233	0.076	7.74811e-13	AD	SF3B1
H2AFV	6.3018e-17	0.775075	0.305	0.115	8.52445e-13	AD	H2AFV
MDM4	7.1076e-17	1.09719	0.203	0.06	9.61445e-13	AD	MDM4
STK25	7.4316e-17	2.31993	0.108	0.016	1.00527e-12	AD	STK25
CUTA	7.47936e-17	1.56581	0.151	0.035	1.01173e-12	AD	CUTA
EXOC3	7.5898e-17	1.28317	0.199	0.059	1.02667e-12	AD	EXOC3
ZNF532	7.93848e-17	1.34949	0.179	0.049	1.07384e-12	AD	ZNF532
CASTOR3	8.14205e-17	0.917877	0.221	0.07	1.10137e-12	AD	CASTOR3
HNRNPH3	8.35646e-17	0.853778	0.283	0.105	1.13038e-12	AD	HNRNPH3
WDR45B	8.99638e-17	2.70593	0.096	0.011	1.21694e-12	AD	WDR45B
PI4KA	9.23397e-17	0.580676	0.452	0.205	1.24908e-12	AD	PI4KA
FBXW4	9.60114e-17	0.63458	0.349	0.141	1.29875e-12	AD	FBXW4
SMAD2	1.02891e-16	1.30701	0.165	0.042	1.39181e-12	AD	SMAD2
LRP10	1.04545e-16	1.24273	0.173	0.045	1.41418e-12	AD	LRP10
GPC1	1.0626e-16	0.616533	0.345	0.141	1.43738e-12	AD	GPC1
TSPAN33	1.07451e-16	1.72321	0.114	0.018	1.45349e-12	AD	TSPAN33
AUTS2	1.07866e-16	1.8892	0.114	0.018	1.4591e-12	AD	AUTS2
ROBO3	1.09898e-16	0.899919	0.201	0.06	1.48659e-12	AD	ROBO3
ANKRD36C	1.18342e-16	1.2113	0.187	0.052	1.60081e-12	AD	ANKRD36C
SHISA6	1.24082e-16	1.98217	0.118	0.02	1.67845e-12	AD	SHISA6
GM2A	1.28308e-16	1.5544	0.155	0.037	1.73563e-12	AD	GM2A
SMARCA4	1.30186e-16	1.78032	0.133	0.027	1.76103e-12	AD	SMARCA4
ZC3H13	1.30773e-16	1.80175	0.135	0.028	1.76896e-12	AD	ZC3H13
AHNAK	1.31588e-16	0.607733	0.526	0.262	1.77999e-12	AD	AHNAK
KHDRBS1	1.37597e-16	0.982782	0.241	0.082	1.86128e-12	AD	KHDRBS1
CCDC85B	1.43424e-16	6.14282	0.062	0.001	1.94009e-12	AD	CCDC85B
DAAM2	1.63816e-16	0.509702	0.424	0.185	2.21594e-12	AD	DAAM2
ACAP2	1.73762e-16	1.14828	0.223	0.073	2.35047e-12	AD	ACAP2
KIFC2	1.74233e-16	0.491786	0.45	0.202	2.35685e-12	AD	KIFC2
MT1F	1.74997e-16	0.541128	0.705	0.394	2.36718e-12	AD	MT1F
PCDH7	1.92168e-16	1.53723	0.125	0.023	2.59945e-12	AD	PCDH7
AP2A2	2.03036e-16	1.30707	0.183	0.051	2.74647e-12	AD	AP2A2
RIN2	2.22317e-16	2.67642	0.092	0.01	3.00728e-12	AD	RIN2
TCF25	2.41741e-16	0.492392	0.452	0.205	3.27003e-12	AD	TCF25
PCNX2	2.44372e-16	0.631574	0.392	0.171	3.30562e-12	AD	PCNX2
AMER2	2.67464e-16	0.888101	0.299	0.118	3.61799e-12	AD	AMER2
TFPT	2.72002e-16	2.55082	0.092	0.01	3.67937e-12	AD	TFPT
FAM168B	2.7316e-16	2.00281	0.116	0.02	3.69504e-12	AD	FAM168B
PHLDB1	2.79324e-16	2.14146	0.108	0.017	3.77842e-12	AD	PHLDB1
RAB11B	2.83557e-16	1.45749	0.141	0.031	3.83567e-12	AD	RAB11B
APCDD1	3.02358e-16	0.581745	0.345	0.142	4.09e-12	AD	APCDD1
TBL1XR1	3.40302e-16	1.24435	0.151	0.036	4.60326e-12	AD	TBL1XR1
CAPG	3.44315e-16	0.733428	0.203	0.061	4.65755e-12	AD	CAPG
PIK3R1	3.7385e-16	0.954549	0.219	0.07	5.05707e-12	AD	PIK3R1
HDGF	3.893e-16	1.05289	0.213	0.068	5.26606e-12	AD	HDGF
FLOT1	3.98046e-16	0.819451	0.293	0.113	5.38437e-12	AD	FLOT1
STARD3	4.26383e-16	1.06329	0.197	0.06	5.76768e-12	AD	STARD3
MERTK	4.55635e-16	0.996298	0.177	0.049	6.16338e-12	AD	MERTK
ABI2	4.96779e-16	0.820208	0.295	0.115	6.71993e-12	AD	ABI2
REEP2	5.58698e-16	0.43224	0.446	0.198	7.5575e-12	AD	REEP2
KANK1	6.08e-16	1.12992	0.147	0.035	8.22441e-12	AD	KANK1
NF2	6.33147e-16	1.7001	0.135	0.03	8.56458e-12	AD	NF2
HNRNPA0	6.38308e-16	2.15291	0.102	0.015	8.63439e-12	AD	HNRNPA0
PIP5K1C	6.57901e-16	8.15476	0.056	0	8.89943e-12	AD	PIP5K1C
TSPYL4	6.798e-16	1.10595	0.229	0.078	9.19565e-12	AD	TSPYL4
DBNL	6.92156e-16	2.01513	0.106	0.017	9.3628e-12	AD	DBNL
C1QTNF4	6.94839e-16	1.03077	0.215	0.07	9.39909e-12	AD	C1QTNF4
BCL9L	7.01957e-16	3.31449	0.072	0.004	9.49538e-12	AD	BCL9L
SSPN	7.09943e-16	1.53205	0.133	0.029	9.60339e-12	AD	SSPN
ILF3	8.00887e-16	0.850612	0.311	0.127	1.08336e-11	AD	ILF3
H1FX	8.09478e-16	2.68975	0.092	0.011	1.09498e-11	AD	H1FX
TNKS	8.42415e-16	2.6363	0.092	0.011	1.13953e-11	AD	TNKS
MAPKAP1	8.66147e-16	1.83942	0.112	0.019	1.17164e-11	AD	MAPKAP1
RBM6	8.71238e-16	1.27132	0.175	0.05	1.17852e-11	AD	RBM6
NCOA1	1.11132e-15	0.7507	0.273	0.103	1.50328e-11	AD	NCOA1
FBXW5	1.19633e-15	1.62332	0.116	0.021	1.61828e-11	AD	FBXW5
CLK1	1.29044e-15	1.41033	0.147	0.036	1.74558e-11	AD	CLK1
ADIRF1	1.36153e-15	0.528663	0.58	0.289	1.84174e-11	AD	ADIRF
IST1	1.37882e-15	2.73242	0.084	0.009	1.86514e-11	AD	IST1
SORBS3	1.43098e-15	0.859246	0.175	0.049	1.93569e-11	AD	SORBS3
WBP1L	1.54459e-15	3.30098	0.076	0.006	2.08937e-11	AD	WBP1L
PAIP2	1.7147e-15	0.673504	0.317	0.128	2.31948e-11	AD	PAIP2
CELF2	1.73509e-15	0.623885	0.325	0.131	2.34706e-11	AD	CELF2
AGPAT3	1.78791e-15	0.937189	0.245	0.089	2.4185e-11	AD	AGPAT3
HDAC5	1.83596e-15	1.12434	0.175	0.05	2.4835e-11	AD	HDAC5
USP47	1.87634e-15	1.97497	0.122	0.024	2.53812e-11	AD	USP47
TMEM8B	1.974e-15	1.24723	0.161	0.043	2.67023e-11	AD	TMEM8B
APBA1	2.02333e-15	1.53093	0.141	0.033	2.73696e-11	AD	APBA1
SSU72	2.07598e-15	2.1245	0.106	0.017	2.80818e-11	AD	SSU72
BAZ1B	2.16747e-15	0.966444	0.227	0.078	2.93194e-11	AD	BAZ1B
TRIR	2.21392e-15	1.2861	0.175	0.05	2.99477e-11	AD	TRIR
MYH10	2.48684e-15	2.62255	0.09	0.011	3.36395e-11	AD	MYH10
SAMD14	2.59185e-15	0.651845	0.347	0.149	3.506e-11	AD	SAMD14
CTXND1	2.7456e-15	1.56333	0.11	0.019	3.71397e-11	AD	CTXND1
PAPOLA	2.79565e-15	0.769933	0.255	0.094	3.78167e-11	AD	PAPOLA
ATP2B1	2.89619e-15	2.38166	0.09	0.011	3.91768e-11	AD	ATP2B1
GIGYF2	3.05228e-15	1.7509	0.108	0.018	4.12883e-11	AD	GIGYF2
FXR2	3.20579e-15	1.72668	0.11	0.019	4.33647e-11	AD	FXR2
DZIP1	3.32272e-15	1.01363	0.231	0.083	4.49464e-11	AD	DZIP1
PAIP2B	3.44803e-15	1.31767	0.183	0.056	4.66415e-11	AD	PAIP2B
SPRED1	3.53778e-15	1.15512	0.155	0.04	4.78556e-11	AD	SPRED1
PUM2	3.60805e-15	2.37429	0.094	0.013	4.88061e-11	AD	PUM2
RETREG2	3.67985e-15	3.11333	0.072	0.005	4.97773e-11	AD	RETREG2
IK	3.73898e-15	1.61259	0.133	0.03	5.05772e-11	AD	IK
CBR1	3.84783e-15	0.83734	0.277	0.108	5.20497e-11	AD	CBR1
STAU2	4.22016e-15	1.03039	0.195	0.061	5.70861e-11	AD	STAU2
HNRNPU	4.33984e-15	0.769329	0.231	0.08	5.8705e-11	AD	HNRNPU
CTIF	4.74916e-15	0.785286	0.257	0.096	6.42419e-11	AD	CTIF
CTDSP2	4.76198e-15	0.951305	0.215	0.072	6.44153e-11	AD	CTDSP2
STUB1	4.98892e-15	1.08507	0.195	0.062	6.74851e-11	AD	STUB1
SNX1	5.01772e-15	2.13345	0.1	0.016	6.78747e-11	AD	SNX1
TNRC18	5.15568e-15	3.0614	0.074	0.006	6.97408e-11	AD	TNRC18
RBM33	5.62579e-15	2.02419	0.108	0.019	7.61001e-11	AD	RBM33
PFDN1	5.64422e-15	2.01377	0.116	0.023	7.63494e-11	AD	PFDN1
ATF2	5.69564e-15	1.85134	0.122	0.025	7.70449e-11	AD	ATF2
ZBTB16	5.98174e-15	2.01984	0.102	0.017	8.09149e-11	AD	ZBTB16
ACSM5	6.13381e-15	2.62471	0.086	0.01	8.29721e-11	AD	ACSM5
SPAG9	6.47099e-15	0.760167	0.253	0.094	8.75331e-11	AD	SPAG9
MYH9	6.68262e-15	2.53631	0.086	0.01	9.03958e-11	AD	MYH9
KLHDC3	6.7832e-15	1.73678	0.114	0.022	9.17563e-11	AD	KLHDC3
ATXN7L3	6.84671e-15	2.48656	0.086	0.01	9.26155e-11	AD	ATXN7L3
CRYL1	7.11981e-15	1.53051	0.137	0.033	9.63097e-11	AD	CRYL1
TEX2	7.30518e-15	0.810968	0.231	0.081	9.88172e-11	AD	TEX2
SGSM3	7.36545e-15	4.23114	0.062	0.003	9.96324e-11	AD	SGSM3
SPATA20	7.40566e-15	1.45713	0.102	0.017	1.00176e-10	AD	SPATA20
LDB1	7.46055e-15	1.22505	0.163	0.045	1.00919e-10	AD	LDB1
CTNNA1	8.00578e-15	1.54115	0.116	0.023	1.08294e-10	AD	CTNNA1
SNPH	8.40906e-15	0.433624	0.558	0.277	1.13749e-10	AD	SNPH
LAMTOR4	9.51281e-15	0.891406	0.249	0.094	1.2868e-10	AD	LAMTOR4
PADI2	9.89989e-15	0.442407	0.376	0.167	1.33916e-10	AD	PADI2
KLF15	1.00921e-14	0.631768	0.297	0.12	1.36515e-10	AD	KLF15
FOXN3	1.08687e-14	1.27247	0.135	0.032	1.47021e-10	AD	FOXN3
RABEP1	1.11117e-14	0.897844	0.217	0.074	1.50308e-10	AD	RABEP1
TRIM41	1.18984e-14	0.781955	0.229	0.081	1.6095e-10	AD	TRIM41
PCBP1	1.22847e-14	0.889502	0.253	0.096	1.66175e-10	AD	PCBP1
ARF1	1.23002e-14	1.1758	0.179	0.055	1.66385e-10	AD	ARF1
LASP1	1.24242e-14	1.0352	0.207	0.07	1.68063e-10	AD	LASP1
RAB14	1.24334e-14	1.52367	0.141	0.036	1.68186e-10	AD	RAB14
PICALM	1.2936e-14	3.92976	0.058	0.002	1.74986e-10	AD	PICALM
KPNA4	1.31396e-14	0.678896	0.229	0.08	1.7774e-10	AD	KPNA4
PPP2R2C	1.32729e-14	0.636908	0.375	0.169	1.79542e-10	AD	PPP2R2C
VCP	1.35321e-14	1.48244	0.131	0.03	1.83049e-10	AD	VCP
AMPD2	1.35544e-14	1.38773	0.137	0.033	1.8335e-10	AD	AMPD2
BAP1	1.38698e-14	2.0198	0.1	0.017	1.87616e-10	AD	BAP1
IRS2	1.56711e-14	1.93834	0.108	0.02	2.11983e-10	AD	IRS2
RALBP1	1.58984e-14	1.99842	0.106	0.019	2.15058e-10	AD	RALBP1
RNF146	1.64835e-14	1.01389	0.211	0.072	2.22972e-10	AD	RNF146
ABLIM3	1.67284e-14	1.9434	0.096	0.015	2.26286e-10	AD	ABLIM3
REX1BD	1.71891e-14	1.60294	0.122	0.026	2.32516e-10	AD	REX1BD
GATAD2A	1.84088e-14	1.51912	0.125	0.028	2.49015e-10	AD	GATAD2A
NYAP11	1.87783e-14	0.360795	0.416	0.193	2.54014e-10	AD	NYAP1
CLIP2	1.88411e-14	1.68105	0.108	0.02	2.54863e-10	AD	CLIP2
NDST1	1.91123e-14	1.61849	0.12	0.025	2.58533e-10	AD	NDST1
ABHD12	1.93173e-14	1.0116	0.173	0.052	2.61305e-10	AD	ABHD12
KALRN	2.22825e-14	1.12432	0.185	0.059	3.01416e-10	AD	KALRN
KCNQ3	2.30082e-14	3.33088	0.066	0.004	3.11232e-10	AD	KCNQ3
UBXN6	2.33765e-14	0.403163	0.516	0.255	3.16213e-10	AD	UBXN6
REXO1	2.37881e-14	2.63202	0.074	0.007	3.21782e-10	AD	REXO1
PLXNB1	2.41921e-14	0.510307	0.456	0.221	3.27246e-10	AD	PLXNB1
C1orf122	2.59111e-14	0.483485	0.367	0.161	3.505e-10	AD	C1orf122
NFIC	2.771e-14	0.512115	0.329	0.139	3.74833e-10	AD	NFIC
ARHGDIA	2.77513e-14	1.45416	0.131	0.031	3.75392e-10	AD	ARHGDIA
ARIH1	2.88178e-14	1.26659	0.147	0.039	3.89819e-10	AD	ARIH1
SERINC5	2.91842e-14	2.82971	0.076	0.008	3.94775e-10	AD	SERINC5
NRGN	3.11628e-14	0.569588	0.378	0.167	4.21539e-10	AD	NRGN
CACNG7	3.49418e-14	2.11979	0.1	0.017	4.72658e-10	AD	CACNG7
GOLM11	3.71294e-14	0.764761	0.335	0.149	5.02249e-10	AD	GOLM1
NISCH	3.72846e-14	0.448345	0.512	0.252	5.04348e-10	AD	NISCH
AKAP8L	3.85388e-14	1.77381	0.112	0.023	5.21315e-10	AD	AKAP8L
SLC35E2B	3.90272e-14	1.09395	0.139	0.035	5.27921e-10	AD	SLC35E2B
PTK2B	4.00837e-14	2.08251	0.096	0.016	5.42212e-10	AD	PTK2B
NR1H2	4.13528e-14	2.02033	0.098	0.017	5.59379e-10	AD	NR1H2
SCN1B	4.14258e-14	4.21848	0.056	0.002	5.60367e-10	AD	SCN1B
S100A16	4.22043e-14	4.24888	0.056	0.002	5.70897e-10	AD	S100A16
CD151	4.23464e-14	1.78587	0.114	0.023	5.72819e-10	AD	CD151
HIRA	4.26782e-14	4.01256	0.056	0.002	5.77308e-10	AD	HIRA
GDF11	4.32124e-14	1.87915	0.078	0.009	5.84534e-10	AD	GDF11
HNRNPUL1	4.34142e-14	0.425942	0.546	0.273	5.87264e-10	AD	HNRNPUL1
INPPL1	4.38208e-14	1.24343	0.122	0.027	5.92764e-10	AD	INPPL1
PACSIN1	4.60857e-14	2.02756	0.096	0.016	6.23401e-10	AD	PACSIN1
KIF5A1	4.79136e-14	0.473927	0.717	0.393	6.48127e-10	AD	KIF5A
CASTOR2	5.22782e-14	1.59596	0.102	0.018	7.07167e-10	AD	CASTOR2
MLF2	5.47838e-14	0.567533	0.353	0.158	7.41061e-10	AD	MLF2
CDC42BPB	5.64649e-14	1.07784	0.161	0.047	7.638e-10	AD	CDC42BPB
RERE	5.76338e-14	0.462649	0.398	0.182	7.79613e-10	AD	RERE
ZNF444	5.93705e-14	0.509757	0.241	0.089	8.03105e-10	AD	ZNF444
NELFB	6.15393e-14	1.31171	0.116	0.024	8.32442e-10	AD	NELFB
FAM118A	6.22877e-14	5.20094	0.052	0.001	8.42566e-10	AD	FAM118A
LRRC47	6.24198e-14	2.38979	0.084	0.011	8.44352e-10	AD	LRRC47
NAV2	6.4925e-14	1.41343	0.149	0.042	8.7824e-10	AD	NAV2
ZMYM2	6.59487e-14	0.975619	0.173	0.053	8.92088e-10	AD	ZMYM2
LAMP1	7.0454e-14	0.686679	0.307	0.13	9.53031e-10	AD	LAMP1
ZBTB4	7.16169e-14	0.600669	0.229	0.083	9.68762e-10	AD	ZBTB4
SIPA1L3	7.21701e-14	3.28541	0.064	0.004	9.76245e-10	AD	SIPA1L3
TAPBP	7.37385e-14	1.24501	0.131	0.032	9.9746e-10	AD	TAPBP
CDV3	7.54353e-14	2.37164	0.072	0.007	1.02041e-09	AD	CDV3
DCAF7	7.96375e-14	1.91867	0.114	0.024	1.07726e-09	AD	DCAF7
LPAR1	8.03614e-14	7.96919	0.048	0	1.08705e-09	AD	LPAR1
ANTXR1	8.05145e-14	0.69213	0.376	0.182	1.08912e-09	AD	ANTXR1
ANXA11	8.21458e-14	0.729262	0.271	0.109	1.11119e-09	AD	ANXA11
DTX1	8.21636e-14	0.535482	0.309	0.131	1.11143e-09	AD	DTX1
NDUFA10	8.79116e-14	1.28296	0.151	0.043	1.18918e-09	AD	NDUFA10
HCFC1R1	9.03108e-14	1.3554	0.137	0.036	1.22163e-09	AD	HCFC1R1
PLEKHA2	9.46474e-14	1.25587	0.177	0.057	1.2803e-09	AD	PLEKHA2
ATP9B	9.49272e-14	0.497057	0.422	0.2	1.28408e-09	AD	ATP9B
PDK2	9.7834e-14	0.998007	0.171	0.053	1.3234e-09	AD	PDK2
PPIB	9.90513e-14	1.46447	0.137	0.036	1.33987e-09	AD	PPIB
VPS28	1.04016e-13	1.40294	0.124	0.029	1.40702e-09	AD	VPS28
QRICH1	1.12141e-13	2.12061	0.098	0.017	1.51693e-09	AD	QRICH1
TTYH3	1.14553e-13	1.51309	0.112	0.023	1.54956e-09	AD	TTYH3
GMNN	1.16074e-13	1.55665	0.127	0.031	1.57013e-09	AD	GMNN
FBRSL1	1.18027e-13	2.6621	0.066	0.005	1.59655e-09	AD	FBRSL1
PRPF8	1.18608e-13	1.8757	0.096	0.017	1.60441e-09	AD	PRPF8
U2AF2	1.21573e-13	1.17467	0.137	0.036	1.64451e-09	AD	U2AF2
ABCC5	1.2396e-13	2.55845	0.076	0.009	1.67681e-09	AD	ABCC5
KBTBD11	1.28831e-13	0.620464	0.251	0.098	1.7427e-09	AD	KBTBD11
OBSL1	1.29214e-13	0.66752	0.251	0.099	1.74788e-09	AD	OBSL1
CLASP2	1.30776e-13	0.892747	0.195	0.066	1.76901e-09	AD	CLASP2
DBNDD1	1.34002e-13	1.65386	0.098	0.017	1.81264e-09	AD	DBNDD1
RIPOR1	1.34983e-13	4.35048	0.054	0.002	1.82592e-09	AD	RIPOR1
PDGFRB	1.34993e-13	0.674655	0.247	0.097	1.82605e-09	AD	PDGFRB
ZNF423	1.35847e-13	1.17991	0.12	0.027	1.83761e-09	AD	ZNF423
EXOSC6	1.35989e-13	4.43227	0.054	0.002	1.83952e-09	AD	EXOSC6
SLC25A22	1.37977e-13	0.622924	0.299	0.124	1.86642e-09	AD	SLC25A22
MRFAP1L1	1.42505e-13	0.59384	0.394	0.188	1.92767e-09	AD	MRFAP1L1
DCXR	1.48326e-13	0.618221	0.259	0.103	2.00641e-09	AD	DCXR
SPTBN1	1.54533e-13	0.413344	0.6	0.313	2.09037e-09	AD	SPTBN1
TRIM28	1.56542e-13	1.51133	0.112	0.023	2.11754e-09	AD	TRIM28
PLXNB2	1.58141e-13	0.445867	0.339	0.15	2.13917e-09	AD	PLXNB2
FARP1	1.60445e-13	0.334074	0.43	0.205	2.17034e-09	AD	FARP1
TADA3	1.63187e-13	0.915167	0.189	0.063	2.20744e-09	AD	TADA3
CCDC92	1.74456e-13	0.80514	0.267	0.109	2.35986e-09	AD	CCDC92
KHSRP	2.00952e-13	0.707161	0.213	0.076	2.71828e-09	AD	KHSRP
FJX1	2.04946e-13	1.60984	0.122	0.029	2.77231e-09	AD	FJX1
SPHK2	2.05785e-13	1.11734	0.106	0.021	2.78365e-09	AD	SPHK2
FBXW11	2.06192e-13	1.10589	0.163	0.05	2.78916e-09	AD	FBXW11
RAB11FIP4	2.17768e-13	0.774883	0.229	0.086	2.94575e-09	AD	RAB11FIP4
FRS2	2.20666e-13	1.02122	0.163	0.05	2.98495e-09	AD	FRS2
POM121C	2.25902e-13	2.16494	0.082	0.011	3.05577e-09	AD	POM121C
MTMR3	2.33301e-13	1.47261	0.118	0.027	3.15587e-09	AD	MTMR3
INTS1	2.50681e-13	2.13382	0.092	0.016	3.39096e-09	AD	INTS1
GAB1	2.54836e-13	2.02503	0.086	0.013	3.44717e-09	AD	GAB1
RXRA	2.60603e-13	0.266787	0.438	0.213	3.52518e-09	AD	RXRA
YY1	2.66709e-13	8.08932	0.046	0	3.60777e-09	AD	YY1
POU3F3	2.70422e-13	0.775191	0.175	0.056	3.658e-09	AD	POU3F3
MXD4	2.74862e-13	0.717376	0.209	0.075	3.71806e-09	AD	MXD4
SCP2	2.81553e-13	0.644412	0.325	0.145	3.80857e-09	AD	SCP2
PPP1R12A	2.8467e-13	1.22205	0.163	0.05	3.85073e-09	AD	PPP1R12A
HRAS	2.89996e-13	2.52254	0.072	0.008	3.92278e-09	AD	HRAS
PLBD2	2.96502e-13	1.184	0.118	0.027	4.01079e-09	AD	PLBD2
DYRK1A	3.02061e-13	2.03908	0.094	0.017	4.08598e-09	AD	DYRK1A
UNC80	3.19154e-13	2.76583	0.074	0.009	4.3172e-09	AD	UNC80
LRRC8A	3.24433e-13	0.309698	0.237	0.089	4.3886e-09	AD	LRRC8A
HECTD1	3.24989e-13	1.43422	0.114	0.025	4.39612e-09	AD	HECTD1
GOLIM41	3.25691e-13	1.11026	0.114	0.025	4.40563e-09	AD	GOLIM4
NSMF1	3.32781e-13	0.184759	1	0.999	4.50153e-09	AD	NSMF
TBCB	3.3427e-13	0.874943	0.215	0.079	4.52167e-09	AD	TBCB
CCPG1	3.34879e-13	0.939521	0.195	0.068	4.52991e-09	AD	CCPG1
ABCA1	3.35376e-13	0.616489	0.149	0.043	4.53663e-09	AD	ABCA1
CYTH2	3.42314e-13	1.71702	0.096	0.017	4.63047e-09	AD	CYTH2
SMARCC1	3.42964e-13	1.70516	0.106	0.022	4.63927e-09	AD	SMARCC1
BMP2K	3.45841e-13	0.532584	0.247	0.096	4.67819e-09	AD	BMP2K
DEF8	3.46132e-13	0.961303	0.171	0.055	4.68212e-09	AD	DEF8
PDXK	3.46906e-13	1.84213	0.094	0.017	4.6926e-09	AD	PDXK
RAB1A	3.49738e-13	0.559566	0.275	0.113	4.73091e-09	AD	RAB1A
DYNC1H1	3.58338e-13	0.341841	0.398	0.184	4.84724e-09	AD	DYNC1H1
MAX	3.60528e-13	0.86244	0.217	0.081	4.87686e-09	AD	MAX
SH3BGRL2	3.70716e-13	1.47381	0.127	0.032	5.01467e-09	AD	SH3BGRL2
TAF6	3.72922e-13	2.47864	0.074	0.009	5.04452e-09	AD	TAF6
FXR1	3.8703e-13	0.962564	0.179	0.059	5.23535e-09	AD	FXR1
ZHX3	3.88873e-13	0.475917	0.388	0.182	5.26028e-09	AD	ZHX3
TAF10	4.15286e-13	1.66606	0.092	0.016	5.61757e-09	AD	TAF10
JDP2	4.2744e-13	0.864684	0.159	0.048	5.78198e-09	AD	JDP2
NEK7	4.46272e-13	3.64059	0.058	0.003	6.03672e-09	AD	NEK7
JMY	4.52434e-13	3.91387	0.052	0.002	6.12008e-09	AD	JMY
DGCR2	4.69815e-13	1.25813	0.11	0.023	6.35519e-09	AD	DGCR2
LTBP3	4.71521e-13	0.313722	0.46	0.223	6.37827e-09	AD	LTBP3
RALGAPA1	4.86601e-13	2.31959	0.078	0.01	6.58225e-09	AD	RALGAPA1
LAMTOR1	4.95084e-13	0.973083	0.175	0.057	6.697e-09	AD	LAMTOR1
SCRN1	5.08825e-13	0.391703	0.492	0.258	6.88287e-09	AD	SCRN1
TBC1D14	5.13822e-13	2.83684	0.066	0.006	6.95047e-09	AD	TBC1D14
EIF5B	5.43224e-13	3.33065	0.068	0.007	7.3482e-09	AD	EIF5B
BNIP3L	5.52262e-13	0.516339	0.43	0.212	7.47044e-09	AD	BNIP3L
RNF141	5.87846e-13	1.02333	0.179	0.06	7.9518e-09	AD	RNF141
MAFG	6.00245e-13	0.817687	0.151	0.044	8.11952e-09	AD	MAFG
ATP13A2	6.23148e-13	2.95202	0.068	0.007	8.42932e-09	AD	ATP13A2
WNK1	6.36972e-13	0.360438	0.474	0.229	8.61633e-09	AD	WNK1
POLDIP3	6.37926e-13	1.21272	0.151	0.045	8.62923e-09	AD	POLDIP3
CRK	6.49138e-13	2.28476	0.084	0.013	8.78089e-09	AD	CRK
ZBTB44	6.63826e-13	2.68881	0.068	0.007	8.97957e-09	AD	ZBTB44
SLC48A1	6.65175e-13	0.433889	0.345	0.154	8.99782e-09	AD	SLC48A1
SPOCK2	6.72881e-13	0.346644	0.631	0.331	9.10205e-09	AD	SPOCK2
PSMD2	6.79901e-13	1.74031	0.106	0.023	9.19702e-09	AD	PSMD2
POM121	7.00204e-13	2.08017	0.092	0.017	9.47166e-09	AD	POM121
GRK2	7.0552e-13	1.0164	0.155	0.047	9.54357e-09	AD	GRK2
GATD1	7.08266e-13	0.679314	0.275	0.117	9.58071e-09	AD	GATD1
PSMB4	7.27849e-13	1.01787	0.177	0.059	9.84561e-09	AD	PSMB4
UBAP1	7.28617e-13	1.23	0.118	0.028	9.856e-09	AD	UBAP1
EIF11	7.67655e-13	0.584788	0.313	0.136	1.03841e-08	AD	EIF1
UBE2E2	7.87389e-13	2.15331	0.084	0.013	1.0651e-08	AD	UBE2E2
RBM25	8.11064e-13	1.27133	0.147	0.043	1.09713e-08	AD	RBM25
BLCAP	8.12354e-13	1.87071	0.1	0.02	1.09887e-08	AD	BLCAP
DDX42	8.23319e-13	1.41586	0.124	0.031	1.1137e-08	AD	DDX42
ARHGEF7	8.6155e-13	1.18468	0.133	0.036	1.16542e-08	AD	ARHGEF7
TBC1D10B	8.62668e-13	3.43451	0.054	0.003	1.16693e-08	AD	TBC1D10B
ALAD1	8.672e-13	0.34145	0.305	0.132	1.17306e-08	AD	ALAD
CBARP	9.74827e-13	0.756734	0.169	0.055	1.31865e-08	AD	CBARP
FUT10	9.77266e-13	1.31525	0.124	0.031	1.32195e-08	AD	FUT10
CCDC88B	1.11919e-12	2.64554	0.062	0.005	1.51393e-08	AD	CCDC88B
SMARCB1	1.16589e-12	1.08937	0.187	0.066	1.5771e-08	AD	SMARCB1
KIAA0232	1.2798e-12	1.67599	0.122	0.031	1.73119e-08	AD	KIAA0232
UBXN4	1.28006e-12	1.42179	0.122	0.03	1.73154e-08	AD	UBXN4
TNS3	1.28295e-12	1.67792	0.072	0.009	1.73545e-08	AD	TNS3
ZC3H4	1.39415e-12	1.29317	0.131	0.036	1.88587e-08	AD	ZC3H4
MAN2A1	1.41169e-12	3.59322	0.056	0.003	1.90959e-08	AD	MAN2A1
NME3	1.43427e-12	2.5613	0.08	0.012	1.94014e-08	AD	NME3
PRKACA	1.44696e-12	0.593954	0.265	0.111	1.9573e-08	AD	PRKACA
FAM193B	1.45481e-12	0.413721	0.53	0.283	1.96793e-08	AD	FAM193B
FBRS	1.47518e-12	2.28205	0.076	0.01	1.99547e-08	AD	FBRS
IGFBP7	1.49539e-12	0.44133	0.582	0.316	2.02281e-08	AD	IGFBP7
PGM11	1.50614e-12	0.552939	0.199	0.072	2.03736e-08	AD	PGM1
GIPC1	1.51515e-12	1.51875	0.112	0.026	2.04954e-08	AD	GIPC1
TTR	1.56719e-12	4.19856	0.07	0.009	2.11994e-08	AD	TTR
ARHGAP21	1.59549e-12	0.491373	0.313	0.14	2.15822e-08	AD	ARHGAP21
ATP5F1D	1.61118e-12	0.444394	0.388	0.183	2.17944e-08	AD	ATP5F1D
RTF2	1.69928e-12	0.914376	0.167	0.055	2.29862e-08	AD	RTF2
MLEC	1.82999e-12	2.2051	0.08	0.012	2.47542e-08	AD	MLEC
CMIP	1.83576e-12	2.07774	0.088	0.016	2.48324e-08	AD	CMIP
FCGRT	1.88471e-12	1.16699	0.145	0.043	2.54945e-08	AD	FCGRT
AKT2	1.90217e-12	1.04627	0.129	0.035	2.57306e-08	AD	AKT2
UBE2E3	1.92828e-12	0.564928	0.279	0.119	2.60839e-08	AD	UBE2E3
TEAD1	1.94277e-12	1.39012	0.108	0.024	2.62799e-08	AD	TEAD1
ROM1	1.949e-12	0.946572	0.149	0.045	2.63642e-08	AD	ROM1
FLII	1.95222e-12	1.2091	0.137	0.039	2.64077e-08	AD	FLII
SDR39U1	2.00382e-12	3.8934	0.058	0.004	2.71057e-08	AD	SDR39U1
SOS2	2.05673e-12	1.93533	0.094	0.018	2.78214e-08	AD	SOS2
GALNT15	2.11244e-12	1.6928	0.1	0.021	2.85749e-08	AD	GALNT15
RAB31	2.12907e-12	0.496358	0.375	0.182	2.88e-08	AD	RAB31
NPEPPS	2.23947e-12	0.911464	0.181	0.063	3.02933e-08	AD	NPEPPS
TRIP12	2.25026e-12	1.60742	0.104	0.023	3.04393e-08	AD	TRIP12
TBC1D1	2.29219e-12	1.84743	0.088	0.016	3.10064e-08	AD	TBC1D1
MIB2	2.30076e-12	0.876066	0.213	0.083	3.11224e-08	AD	MIB2
RANBP3	2.31089e-12	1.61535	0.102	0.022	3.12594e-08	AD	RANBP3
FOXK1	2.35714e-12	1.87191	0.086	0.015	3.1885e-08	AD	FOXK1
NSD3	2.40987e-12	0.683112	0.221	0.084	3.25983e-08	AD	NSD3
RBM26	2.45188e-12	1.0014	0.155	0.049	3.31665e-08	AD	RBM26
EIF4G3	2.46878e-12	0.963145	0.159	0.05	3.33952e-08	AD	EIF4G3
MARF1	2.48103e-12	1.38328	0.106	0.023	3.35609e-08	AD	MARF1
ST5	2.52653e-12	0.432913	0.193	0.069	3.41764e-08	AD	ST5
CPEB2	2.62404e-12	1.53284	0.1	0.021	3.54954e-08	AD	CPEB2
TLE1	2.67611e-12	0.865933	0.129	0.035	3.61998e-08	AD	TLE1
IP6K1	2.70561e-12	2.35637	0.068	0.008	3.65988e-08	AD	IP6K1
PIN1	2.72713e-12	0.780872	0.227	0.09	3.68899e-08	AD	PIN1
RND2	2.7449e-12	1.60895	0.094	0.018	3.71303e-08	AD	RND2
PPP1CC	2.74505e-12	1.15348	0.171	0.059	3.71323e-08	AD	PPP1CC
PURB	2.78702e-12	1.04781	0.177	0.063	3.77001e-08	AD	PURB
LUC7L2	2.79244e-12	0.920321	0.155	0.049	3.77734e-08	AD	LUC7L2
USP46	2.79634e-12	1.61403	0.094	0.018	3.78261e-08	AD	USP46
TCP11L1	2.82151e-12	1.62565	0.096	0.019	3.81665e-08	AD	TCP11L1
CLEC16A	2.84841e-12	0.874756	0.145	0.043	3.85305e-08	AD	CLEC16A
EHMT2	2.89462e-12	2.57766	0.07	0.009	3.91555e-08	AD	EHMT2
GLYR1	2.92302e-12	0.632995	0.291	0.129	3.95398e-08	AD	GLYR1
PCBP4	3.08704e-12	1.36565	0.12	0.03	4.17584e-08	AD	PCBP4
KIF5C	3.14069e-12	0.715672	0.255	0.106	4.24842e-08	AD	KIF5C
CDH2	3.1526e-12	0.853886	0.189	0.068	4.26452e-08	AD	CDH2
RNF187	3.21691e-12	0.396073	0.39	0.188	4.35152e-08	AD	RNF187
XPC	3.21841e-12	2.43429	0.07	0.009	4.35354e-08	AD	XPC
MGAT4B	3.23504e-12	2.52142	0.072	0.01	4.37605e-08	AD	MGAT4B
RNPS1	3.28621e-12	1.38708	0.124	0.033	4.44525e-08	AD	RNPS1
CRBN	3.30055e-12	2.84091	0.06	0.005	4.46465e-08	AD	CRBN
VPS26B	3.36906e-12	0.83218	0.203	0.076	4.55733e-08	AD	VPS26B
NEK6	3.41592e-12	0.513921	0.319	0.146	4.62072e-08	AD	NEK6
SPEG	3.41707e-12	0.434073	0.341	0.158	4.62227e-08	AD	SPEG
KCNC4	3.53254e-12	2.02305	0.07	0.009	4.77846e-08	AD	KCNC4
PRICKLE2	3.57235e-12	1.63673	0.108	0.025	4.83232e-08	AD	PRICKLE2
RNF40	3.61659e-12	1.34971	0.116	0.029	4.89216e-08	AD	RNF40
TRA2A	3.77452e-12	0.475585	0.384	0.189	5.1058e-08	AD	TRA2A
SFPQ	3.80966e-12	0.381832	0.432	0.214	5.15333e-08	AD	SFPQ
FAM181B	3.87529e-12	0.410468	0.408	0.203	5.24211e-08	AD	FAM181B
BAD	3.89224e-12	2.23458	0.072	0.01	5.26503e-08	AD	BAD
ARPC2	3.90602e-12	0.695155	0.253	0.107	5.28368e-08	AD	ARPC2
LARP1	3.96107e-12	0.948391	0.203	0.078	5.35813e-08	AD	LARP1
C14orf132	4.08025e-12	0.359126	0.452	0.226	5.51935e-08	AD	C14orf132
ATP6V0B	4.09386e-12	1.03136	0.207	0.081	5.53776e-08	AD	ATP6V0B
PYGB	4.21428e-12	0.317768	0.434	0.218	5.70065e-08	AD	PYGB
KIAA0513	4.25034e-12	1.09457	0.147	0.045	5.74943e-08	AD	KIAA0513
EIF3A	4.34428e-12	0.494182	0.349	0.164	5.87651e-08	AD	EIF3A
HIVEP2	4.55994e-12	3.54208	0.054	0.003	6.16823e-08	AD	HIVEP2
TTC14	4.58674e-12	1.00124	0.149	0.046	6.20449e-08	AD	TTC14
MPHOSPH8	4.69835e-12	2.17369	0.092	0.018	6.35546e-08	AD	MPHOSPH8
CALCOCO2	4.70981e-12	1.34525	0.124	0.033	6.37097e-08	AD	CALCOCO2
PCDH17	4.94324e-12	2.67932	0.054	0.003	6.68672e-08	AD	PCDH17
FASTK	5.20058e-12	1.92288	0.076	0.011	7.03483e-08	AD	FASTK
NFIX	5.20521e-12	0.367231	0.576	0.303	7.04109e-08	AD	NFIX
STAT3	5.24708e-12	0.915604	0.161	0.053	7.09772e-08	AD	STAT3
PLCB1	5.32527e-12	1.95853	0.076	0.011	7.2035e-08	AD	PLCB1
ABCA3	5.33741e-12	1.32799	0.12	0.031	7.21992e-08	AD	ABCA3
WDR26	5.46514e-12	1.96663	0.078	0.012	7.3927e-08	AD	WDR26
MAPK1	5.50882e-12	0.421278	0.392	0.191	7.45179e-08	AD	MAPK1
LSM7	5.64616e-12	1.64723	0.1	0.022	7.63756e-08	AD	LSM7
RARRES2	5.70926e-12	1.83346	0.09	0.017	7.72292e-08	AD	RARRES2
TNKS2	5.79002e-12	1.84473	0.092	0.018	7.83216e-08	AD	TNKS2
THRAP3	5.79951e-12	1.43036	0.116	0.03	7.845e-08	AD	THRAP3
SYMPK	5.8714e-12	1.08461	0.124	0.033	7.94224e-08	AD	SYMPK
PER1	5.94762e-12	1.83634	0.09	0.017	8.04534e-08	AD	PER1
AGFG2	6.12743e-12	0.38302	0.345	0.16	8.28858e-08	AD	AGFG2
PPP1R7	6.3146e-12	0.964117	0.149	0.047	8.54176e-08	AD	PPP1R7
SCARB2	6.82125e-12	0.785621	0.205	0.078	9.2271e-08	AD	SCARB2
MEGF8	6.87141e-12	1.47604	0.096	0.02	9.29496e-08	AD	MEGF8
MYO15B	7.31741e-12	1.51844	0.086	0.016	9.89826e-08	AD	MYO15B
MAPKAPK2	7.46176e-12	1.12741	0.094	0.019	1.00935e-07	AD	MAPKAPK2
SHC2	7.4774e-12	4.79569	0.044	0.001	1.01147e-07	AD	SHC2
EIF3K	7.62252e-12	0.480204	0.333	0.155	1.0311e-07	AD	EIF3K
SPART	7.75999e-12	0.995214	0.129	0.036	1.04969e-07	AD	SPART
CLIP3	7.80385e-12	0.655812	0.211	0.082	1.05563e-07	AD	CLIP3
SYNGAP11	7.85004e-12	0.313847	0.444	0.223	1.06187e-07	AD	SYNGAP1
GNA11	7.95976e-12	2.64693	0.068	0.009	1.07672e-07	AD	GNA11
AFF1	8.12651e-12	1.34496	0.114	0.029	1.09927e-07	AD	AFF1
ZC3H7B	8.44463e-12	3.8052	0.05	0.003	1.14231e-07	AD	ZC3H7B
ADGRL3	8.49709e-12	0.561633	0.261	0.112	1.1494e-07	AD	ADGRL3
MPP6	8.60168e-12	0.380075	0.349	0.166	1.16355e-07	AD	MPP6
IPO5	8.8182e-12	1.1557	0.153	0.05	1.19284e-07	AD	IPO5
MAPRE1	9.08743e-12	0.832309	0.233	0.097	1.22926e-07	AD	MAPRE1
SAR1A	9.20012e-12	1.17953	0.116	0.03	1.2445e-07	AD	SAR1A
TNFSF13	9.61422e-12	0.636905	0.159	0.052	1.30052e-07	AD	TNFSF13
TMEM184B	9.68486e-12	0.552272	0.253	0.107	1.31007e-07	AD	TMEM184B
SCRIB1	9.69701e-12	0.598948	0.149	0.047	1.31172e-07	AD	SCRIB
PFN21	1.05042e-11	0.437441	0.49	0.253	1.42091e-07	AD	PFN2
PHLPP1	1.05218e-11	0.801134	0.151	0.048	1.42329e-07	AD	PHLPP1
TUBGCP2	1.07646e-11	1.48646	0.116	0.03	1.45612e-07	AD	TUBGCP2
ZSWIM8	1.13201e-11	2.32663	0.074	0.011	1.53128e-07	AD	ZSWIM8
KDM1A	1.13524e-11	0.571541	0.267	0.116	1.53564e-07	AD	KDM1A
KMT2E	1.13544e-11	1.95665	0.07	0.01	1.53591e-07	AD	KMT2E
SNN	1.16565e-11	0.304833	0.635	0.332	1.57678e-07	AD	SNN
RHOA1	1.17766e-11	0.361948	0.528	0.271	1.59302e-07	AD	RHOA
DENND1A	1.19659e-11	1.46294	0.104	0.024	1.61863e-07	AD	DENND1A
SHC3	1.21204e-11	2.19505	0.072	0.01	1.63953e-07	AD	SHC3
NIN	1.24863e-11	1.72459	0.098	0.022	1.68902e-07	AD	NIN
COX7A2L	1.26315e-11	2.16183	0.072	0.01	1.70867e-07	AD	COX7A2L
SARS	1.29449e-11	1.19192	0.137	0.042	1.75105e-07	AD	SARS
CAT	1.31472e-11	0.597444	0.185	0.068	1.77842e-07	AD	CAT
RNF4	1.35607e-11	0.932844	0.163	0.056	1.83435e-07	AD	RNF4
WDR60	1.36876e-11	3.72918	0.052	0.003	1.85152e-07	AD	WDR60
ZNF280D	1.37375e-11	1.30731	0.133	0.04	1.85827e-07	AD	ZNF280D
PPP2R5C1	1.37395e-11	0.422479	0.444	0.224	1.85855e-07	AD	PPP2R5C
KXD1	1.39237e-11	0.924796	0.133	0.039	1.88345e-07	AD	KXD1
SDCBP	1.39765e-11	2.47184	0.06	0.006	1.8906e-07	AD	SDCBP
SCAF11	1.41385e-11	1.90786	0.076	0.012	1.91251e-07	AD	SCAF11
TXLNA	1.41676e-11	2.59417	0.06	0.006	1.91645e-07	AD	TXLNA
UBE2Q1	1.4248e-11	3.48221	0.052	0.003	1.92733e-07	AD	UBE2Q1
GGNBP2	1.42817e-11	2.14586	0.074	0.011	1.93188e-07	AD	GGNBP2
TECPR1	1.46341e-11	3.14059	0.052	0.003	1.97955e-07	AD	TECPR1
C2CD2	1.54371e-11	2.85307	0.052	0.003	2.08818e-07	AD	C2CD2
LGI4	1.54869e-11	0.440542	0.325	0.152	2.09491e-07	AD	LGI4
PTPN23	1.55924e-11	2.91497	0.052	0.003	2.10919e-07	AD	PTPN23
ADCY1	1.5878e-11	1.4017	0.104	0.024	2.14781e-07	AD	ADCY1
KRBA1	1.6025e-11	1.85359	0.078	0.013	2.1677e-07	AD	KRBA1
DNAL1	1.64095e-11	1.30496	0.1	0.023	2.21971e-07	AD	DNAL1
PSD4	1.65572e-11	1.70167	0.08	0.014	2.2397e-07	AD	PSD4
ALMS1	1.65964e-11	1.83451	0.078	0.013	2.245e-07	AD	ALMS1
MMP28	1.65975e-11	0.402087	0.255	0.107	2.24515e-07	AD	MMP28
UBQLN1	1.66435e-11	0.429719	0.301	0.136	2.25137e-07	AD	UBQLN1
POU6F1	1.66509e-11	1.08682	0.127	0.036	2.25237e-07	AD	POU6F1
WSB1	1.66571e-11	1.93232	0.088	0.017	2.2532e-07	AD	WSB1
STMN31	1.69642e-11	0.287813	0.576	0.295	2.29475e-07	AD	STMN3
KMT2D	1.73272e-11	1.57547	0.09	0.018	2.34385e-07	AD	KMT2D
FAM102A1	1.73813e-11	0.220391	0.351	0.162	2.35117e-07	AD	FAM102A
PI4KB	1.75835e-11	1.61667	0.092	0.019	2.37852e-07	AD	PI4KB
C19orf12	1.76061e-11	1.85379	0.08	0.014	2.38157e-07	AD	C19orf12
FAM53C	1.77554e-11	1.78626	0.078	0.013	2.40178e-07	AD	FAM53C
HNRNPR	1.81943e-11	1.30305	0.129	0.038	2.46114e-07	AD	HNRNPR
VPS45	1.82772e-11	0.475158	0.277	0.123	2.47236e-07	AD	VPS45
TMEM181	1.88765e-11	2.73894	0.062	0.007	2.55342e-07	AD	TMEM181
AHDC1	1.88792e-11	0.506929	0.179	0.064	2.5538e-07	AD	AHDC1
MBD1	1.90744e-11	1.69156	0.082	0.015	2.5802e-07	AD	MBD1
DRAP1	1.91034e-11	0.67052	0.235	0.098	2.58412e-07	AD	DRAP1
RSF1	1.99197e-11	1.76491	0.082	0.015	2.69454e-07	AD	RSF1
TRIM9	2.00989e-11	0.438117	0.315	0.148	2.71878e-07	AD	TRIM9
ALDH3A2	2.21325e-11	0.890539	0.183	0.069	2.99387e-07	AD	ALDH3A2
DHRS3	2.26846e-11	0.301881	0.235	0.096	3.06854e-07	AD	DHRS3
ZNF362	2.34166e-11	2.72649	0.066	0.009	3.16757e-07	AD	ZNF362
ZRANB2	2.34424e-11	0.747868	0.203	0.08	3.17105e-07	AD	ZRANB2
RAD23A	2.38742e-11	1.44243	0.106	0.026	3.22946e-07	AD	RAD23A
CYHR1	2.42516e-11	0.721023	0.161	0.055	3.28051e-07	AD	CYHR1
CLCN3	2.45273e-11	0.987751	0.175	0.064	3.31781e-07	AD	CLCN3
BCLAF1	2.69313e-11	0.732851	0.199	0.077	3.643e-07	AD	BCLAF1
PTPA	2.70099e-11	0.408451	0.353	0.171	3.65363e-07	AD	PTPA
CHST12	2.74683e-11	3.77457	0.048	0.003	3.71564e-07	AD	CHST12
ZEB1	2.76597e-11	3.79205	0.048	0.003	3.74153e-07	AD	ZEB1
SLC3A2	2.7697e-11	0.380265	0.402	0.207	3.74657e-07	AD	SLC3A2
CMPK1	2.7718e-11	0.848498	0.191	0.073	3.74941e-07	AD	CMPK1
ZNF106	2.79475e-11	1.52295	0.102	0.024	3.78045e-07	AD	ZNF106
DHX30	2.84508e-11	1.07074	0.149	0.05	3.84854e-07	AD	DHX30
SIN3B	2.8987e-11	2.58393	0.068	0.01	3.92108e-07	AD	SIN3B
DCTN4	2.94262e-11	1.01759	0.153	0.051	3.98048e-07	AD	DCTN4
TGOLN2	3.00253e-11	1.35166	0.114	0.03	4.06153e-07	AD	TGOLN2
DDAH2	3.05474e-11	1.14737	0.118	0.032	4.13215e-07	AD	DDAH2
CLCN7	3.07798e-11	1.32198	0.116	0.031	4.16359e-07	AD	CLCN7
EML3	3.2509e-11	1.95381	0.068	0.01	4.39749e-07	AD	EML3
RHOT2	3.28598e-11	1.99668	0.088	0.018	4.44494e-07	AD	RHOT2
GNPTG	3.28693e-11	0.600667	0.309	0.147	4.44623e-07	AD	GNPTG
SGTA	3.28971e-11	0.900817	0.127	0.037	4.45e-07	AD	SGTA
CMTM4	3.33541e-11	0.388171	0.353	0.174	4.51181e-07	AD	CMTM4
CAPNS1	3.50101e-11	0.826429	0.179	0.066	4.73582e-07	AD	CAPNS1
VTI1A	3.59639e-11	1.40377	0.098	0.023	4.86483e-07	AD	VTI1A
VPS13C	3.66768e-11	1.5673	0.094	0.021	4.96127e-07	AD	VPS13C
PCMTD1	3.68402e-11	1.90717	0.07	0.01	4.98337e-07	AD	PCMTD1
XRCC6	3.8058e-11	1.12812	0.157	0.055	5.1481e-07	AD	XRCC6
BCAR3	3.82667e-11	1.87259	0.084	0.017	5.17633e-07	AD	BCAR3
TAB2	3.88985e-11	0.52595	0.233	0.097	5.26179e-07	AD	TAB2
JTB	3.91241e-11	0.876487	0.145	0.047	5.29232e-07	AD	JTB
NCOA4	3.95532e-11	3.12433	0.058	0.006	5.35036e-07	AD	NCOA4
UQCC1	4.15295e-11	0.817784	0.193	0.075	5.6177e-07	AD	UQCC1
OTUB1	4.24002e-11	0.349719	0.404	0.202	5.73547e-07	AD	OTUB1
NFASC	4.2646e-11	0.547643	0.283	0.129	5.76872e-07	AD	NFASC
CCAR2	4.32396e-11	1.25357	0.12	0.034	5.84903e-07	AD	CCAR2
SOGA1	4.33726e-11	3.45908	0.05	0.003	5.86702e-07	AD	SOGA1
CTNND2	4.35748e-11	0.38602	0.793	0.564	5.89436e-07	AD	CTNND2
SAMD8	4.38932e-11	1.52667	0.092	0.02	5.93743e-07	AD	SAMD8
PARVA	4.46236e-11	1.34582	0.108	0.028	6.03623e-07	AD	PARVA
TCAP	4.47118e-11	2.01158	0.078	0.014	6.04816e-07	AD	TCAP
CHDH	4.51008e-11	1.21873	0.11	0.029	6.10079e-07	AD	CHDH
CIZ1	4.51969e-11	1.84664	0.074	0.012	6.11378e-07	AD	CIZ1
HOMER2	4.6006e-11	1.49544	0.09	0.019	6.22323e-07	AD	HOMER2
ASXL2	4.64192e-11	1.64178	0.084	0.017	6.27912e-07	AD	ASXL2
SORL1	4.73258e-11	0.553008	0.289	0.136	6.40176e-07	AD	SORL1
TMEM106B	4.74314e-11	1.36395	0.11	0.029	6.41605e-07	AD	TMEM106B
GPBP1	4.75426e-11	1.69752	0.086	0.017	6.43109e-07	AD	GPBP1
ATP6V0D1	4.75917e-11	0.711576	0.217	0.089	6.43773e-07	AD	ATP6V0D1
UBE2R2	4.77017e-11	1.04995	0.159	0.056	6.4526e-07	AD	UBE2R2
CBFA2T2	4.8846e-11	0.9746	0.131	0.04	6.60739e-07	AD	CBFA2T2
NSD2	4.93159e-11	1.05796	0.139	0.044	6.67096e-07	AD	NSD2
SIGIRR	5.02071e-11	3.95097	0.044	0.002	6.79152e-07	AD	SIGIRR
PPP1R16A1	5.02298e-11	0.537404	0.137	0.043	6.79458e-07	AD	PPP1R16A
C17orf97	5.1314e-11	1.59932	0.076	0.013	6.94125e-07	AD	C17orf97
PRPF40A	5.23425e-11	1.48463	0.078	0.014	7.08037e-07	AD	PRPF40A
ARHGAP35	5.27674e-11	0.149451	0.398	0.193	7.13785e-07	AD	ARHGAP35
ZMIZ1	5.33201e-11	0.573895	0.183	0.069	7.21262e-07	AD	ZMIZ1
CLTC	5.54118e-11	0.34085	0.301	0.137	7.49556e-07	AD	CLTC
MTPN	5.58123e-11	0.442262	0.287	0.13	7.54973e-07	AD	MTPN
YPEL3	5.60546e-11	0.411127	0.363	0.179	7.5825e-07	AD	YPEL3
KNDC1	5.61784e-11	0.256201	0.259	0.111	7.59926e-07	AD	KNDC1
TMEM176B	5.72623e-11	0.649562	0.221	0.093	7.74588e-07	AD	TMEM176B
LDLRAD4	5.73629e-11	2.09696	0.06	0.007	7.75948e-07	AD	LDLRAD4
APLP21	5.74518e-11	0.511017	0.357	0.178	7.77151e-07	AD	APLP2
MGRN1	5.96148e-11	0.907056	0.157	0.055	8.0641e-07	AD	MGRN1
TCF7L2	6.19867e-11	0.640588	0.139	0.044	8.38494e-07	AD	TCF7L2
CAPZB	6.21168e-11	0.322155	0.486	0.254	8.40254e-07	AD	CAPZB
EIF4H1	6.32273e-11	0.289835	0.434	0.215	8.55276e-07	AD	EIF4H
SOX5	6.37315e-11	0.290478	0.217	0.088	8.62095e-07	AD	SOX5
TXN2	6.41156e-11	0.969773	0.185	0.072	8.67292e-07	AD	TXN2
PGPEP1	6.57142e-11	1.55511	0.098	0.023	8.88916e-07	AD	PGPEP1
SMARCC2	6.89022e-11	0.502604	0.275	0.124	9.3204e-07	AD	SMARCC2
TRPS1	6.96224e-11	0.498375	0.384	0.197	9.41783e-07	AD	TRPS1
C11orf58	7.0454e-11	0.825149	0.181	0.069	9.53032e-07	AD	C11orf58
NDRG3	7.04717e-11	0.991623	0.133	0.042	9.5327e-07	AD	NDRG3
SLK	7.08843e-11	3.01002	0.052	0.004	9.58851e-07	AD	SLK
BMP7	7.21278e-11	0.228857	0.325	0.155	9.75673e-07	AD	BMP7
HPCA1	7.26159e-11	0.60687	0.217	0.088	9.82275e-07	AD	HPCA
KLHL2	7.41897e-11	1.50206	0.11	0.03	1.00356e-06	AD	KLHL2
NDUFS8	7.48126e-11	0.765675	0.201	0.081	1.01199e-06	AD	NDUFS8
TMEM176A	7.79324e-11	0.991785	0.191	0.076	1.05419e-06	AD	TMEM176A
CAMK2A1	8.01531e-11	0.443212	0.809	0.519	1.08423e-06	AD	CAMK2A
APBA2	8.33156e-11	0.275561	0.353	0.169	1.12701e-06	AD	APBA2
ENAH	8.56685e-11	0.74219	0.229	0.099	1.15884e-06	AD	ENAH
MARK3	8.68205e-11	0.755681	0.195	0.077	1.17442e-06	AD	MARK3
MARCH3	8.76915e-11	1.84697	0.088	0.019	1.1862e-06	AD	MARCH3
IGIP	8.97923e-11	1.21695	0.112	0.03	1.21462e-06	AD	IGIP
YTHDF1	9.39317e-11	1.13641	0.11	0.03	1.27061e-06	AD	YTHDF1
PAQR8	9.44997e-11	3.18341	0.046	0.003	1.2783e-06	AD	PAQR8
SAP25	9.64721e-11	2.09662	0.046	0.003	1.30498e-06	AD	SAP25
C6orf62	9.84192e-11	0.602871	0.217	0.09	1.33132e-06	AD	C6orf62
HHIPL1	9.87023e-11	0.862995	0.147	0.05	1.33515e-06	AD	HHIPL1
APBB1	1.00004e-10	0.75316	0.169	0.062	1.35275e-06	AD	APBB1
LARGE1	1.00283e-10	2.82287	0.054	0.005	1.35652e-06	AD	LARGE1
SMARCA5	1.00483e-10	1.4821	0.092	0.021	1.35924e-06	AD	SMARCA5
GNA12	1.03482e-10	1.95857	0.068	0.01	1.3998e-06	AD	GNA12
SNX17	1.03939e-10	1.9206	0.066	0.01	1.40598e-06	AD	SNX17
COX6A1	1.0609e-10	0.742553	0.211	0.087	1.43508e-06	AD	COX6A1
CCNY	1.06717e-10	7.52855	0.036	0	1.44356e-06	AD	CCNY
KIAA0753	1.07875e-10	1.76293	0.066	0.01	1.45923e-06	AD	KIAA0753
MAF	1.08462e-10	1.13474	0.092	0.021	1.46716e-06	AD	MAF
POMGNT1	1.09272e-10	1.35927	0.09	0.02	1.47812e-06	AD	POMGNT1
DMTN1	1.10058e-10	0.325788	0.54	0.282	1.48875e-06	AD	DMTN
MVB12B	1.11425e-10	1.57758	0.102	0.026	1.50724e-06	AD	MVB12B
SZRD1	1.11445e-10	2.01353	0.07	0.011	1.50752e-06	AD	SZRD1
UBE4B	1.13645e-10	1.93116	0.072	0.012	1.53728e-06	AD	UBE4B
CAMK2D	1.14636e-10	1.61717	0.084	0.017	1.55068e-06	AD	CAMK2D
PCM11	1.15964e-10	0.378846	0.514	0.281	1.56864e-06	AD	PCM1
IP6K2	1.16583e-10	1.91091	0.074	0.013	1.57702e-06	AD	IP6K2
ADAR	1.17795e-10	0.809609	0.155	0.054	1.59341e-06	AD	ADAR
CHKB	1.21867e-10	1.65742	0.08	0.016	1.64849e-06	AD	CHKB
BRD4	1.21924e-10	1.3146	0.106	0.028	1.64927e-06	AD	BRD4
AKIRIN2	1.2343e-10	0.994566	0.147	0.05	1.66964e-06	AD	AKIRIN2
CYP27A1	1.24289e-10	1.6044	0.082	0.017	1.68125e-06	AD	CYP27A1
KIAA0319L	1.31281e-10	1.63231	0.072	0.012	1.77583e-06	AD	KIAA0319L
CBSL1	1.32023e-10	1.23111	0.078	0.015	1.78588e-06	AD	CBSL
DDT	1.33447e-10	1.99919	0.076	0.014	1.80514e-06	AD	DDT
C20orf194	1.33712e-10	0.869193	0.135	0.043	1.80872e-06	AD	C20orf194
SLC35C2	1.38845e-10	1.07166	0.106	0.028	1.87816e-06	AD	SLC35C2
CYB5D2	1.45967e-10	1.21829	0.112	0.031	1.9745e-06	AD	CYB5D2
ACADVL	1.54511e-10	0.347806	0.667	0.404	2.09008e-06	AD	ACADVL
SGPP1	1.55218e-10	2.58914	0.048	0.003	2.09964e-06	AD	SGPP1
CAPN10	1.55719e-10	1.47097	0.098	0.024	2.10642e-06	AD	CAPN10
NDUFB7	1.57699e-10	0.661876	0.209	0.086	2.1332e-06	AD	NDUFB7
RNH1	1.59895e-10	2.5906	0.058	0.007	2.16291e-06	AD	RNH1
SOD3	1.61184e-10	0.711104	0.135	0.043	2.18033e-06	AD	SOD3
DMXL1	1.63731e-10	1.45389	0.108	0.03	2.21479e-06	AD	DMXL1
SAR1B	1.65356e-10	1.65055	0.096	0.023	2.23678e-06	AD	SAR1B
VCAN	1.67887e-10	1.24602	0.12	0.036	2.271e-06	AD	VCAN
GPSM1	1.6907e-10	0.890906	0.116	0.033	2.28702e-06	AD	GPSM1
OAT	1.77547e-10	0.621009	0.255	0.116	2.40168e-06	AD	OAT
ALDH5A1	1.84545e-10	0.688586	0.133	0.043	2.49634e-06	AD	ALDH5A1
RNF214	1.87096e-10	2.34959	0.06	0.008	2.53084e-06	AD	RNF214
LCAT	1.90243e-10	1.53343	0.102	0.027	2.57342e-06	AD	LCAT
TMEM30A	1.92146e-10	0.952421	0.129	0.041	2.59916e-06	AD	TMEM30A
CDK9	1.96095e-10	1.21969	0.135	0.045	2.65258e-06	AD	CDK9
ACIN1	1.96443e-10	0.730255	0.189	0.076	2.65728e-06	AD	ACIN1
PIK3C3	1.99567e-10	1.75513	0.09	0.021	2.69955e-06	AD	PIK3C3
CLPB	2.07644e-10	1.31525	0.114	0.033	2.8088e-06	AD	CLPB
FUBP1	2.08498e-10	1.43991	0.094	0.023	2.82035e-06	AD	FUBP1
BCL2L13	2.11476e-10	0.513751	0.261	0.119	2.86064e-06	AD	BCL2L13
REPS1	2.11706e-10	0.397719	0.309	0.149	2.86375e-06	AD	REPS1
GOLGA7B1	2.15655e-10	0.242351	0.408	0.21	2.91717e-06	AD	GOLGA7B
APEH	2.16368e-10	2.86891	0.05	0.004	2.92681e-06	AD	APEH
AXIN2	2.23805e-10	2.40542	0.062	0.009	3.02741e-06	AD	AXIN2
RUSC2	2.26555e-10	1.98501	0.06	0.008	3.0646e-06	AD	RUSC2
ST13	2.27308e-10	0.622843	0.251	0.115	3.0748e-06	AD	ST13
SNX6	2.30427e-10	2.53266	0.05	0.004	3.11699e-06	AD	SNX6
CHPF1	2.34309e-10	0.326543	0.273	0.126	3.1695e-06	AD	CHPF
ALKBH5	2.41253e-10	0.604031	0.195	0.079	3.26342e-06	AD	ALKBH5
PLEKHO11	2.42793e-10	0.37764	0.191	0.076	3.28427e-06	AD	PLEKHO1
ARHGAP39	2.44711e-10	0.372499	0.211	0.087	3.3102e-06	AD	ARHGAP39
SAP30BP	2.59454e-10	0.983644	0.143	0.05	3.50964e-06	AD	SAP30BP
STAT5B	2.60534e-10	5.21938	0.038	0.001	3.52424e-06	AD	STAT5B
AKAP12	2.65569e-10	4.72093	0.038	0.001	3.59236e-06	AD	AKAP12
RBM5	2.65779e-10	1.0259	0.125	0.039	3.59519e-06	AD	RBM5
DUT	2.72141e-10	0.73533	0.177	0.069	3.68124e-06	AD	DUT
ERGIC1	2.779e-10	2.26003	0.07	0.012	3.75915e-06	AD	ERGIC1
PSPC1	2.78687e-10	3.83757	0.044	0.003	3.7698e-06	AD	PSPC1
HEXIM1	2.86426e-10	3.85107	0.044	0.003	3.87449e-06	AD	HEXIM1
DCAF5	2.87817e-10	1.41446	0.086	0.019	3.8933e-06	AD	DCAF5
USP34	2.91032e-10	0.933411	0.139	0.047	3.93679e-06	AD	USP34
PPP6R2	2.96147e-10	0.739093	0.201	0.085	4.00597e-06	AD	PPP6R2
TOB2	2.97716e-10	0.250481	0.367	0.185	4.0272e-06	AD	TOB2
AIDA	3.04738e-10	1.41766	0.108	0.03	4.12219e-06	AD	AIDA
PCED1A	3.05446e-10	2.67104	0.052	0.005	4.13177e-06	AD	PCED1A
SETD2	3.06666e-10	0.777641	0.141	0.048	4.14828e-06	AD	SETD2
RSL1D1	3.11824e-10	1.12542	0.104	0.028	4.21805e-06	AD	RSL1D1
EXOC6B	3.12548e-10	1.61692	0.082	0.017	4.22784e-06	AD	EXOC6B
MAP71	3.12766e-10	0.313771	0.418	0.215	4.23078e-06	AD	MAP7
ZNF706	3.15198e-10	1.65636	0.078	0.016	4.26368e-06	AD	ZNF706
VPS9D1	3.18174e-10	1.84252	0.07	0.012	4.30394e-06	AD	VPS9D1
CAPRIN1	3.19814e-10	0.568317	0.239	0.106	4.32612e-06	AD	CAPRIN1
BCL7C	3.22781e-10	0.696915	0.135	0.044	4.36626e-06	AD	BCL7C
B4GALT2	3.22828e-10	1.12788	0.086	0.019	4.3669e-06	AD	B4GALT2
C10orf105	3.24795e-10	0.872435	0.149	0.053	4.39351e-06	AD	C10orf105
ATP6V1C1	3.2938e-10	1.01429	0.147	0.052	4.45552e-06	AD	ATP6V1C1
ANKRD10	3.30619e-10	1.88612	0.068	0.011	4.47228e-06	AD	ANKRD10
CSDE1	3.39944e-10	1.2392	0.102	0.027	4.59843e-06	AD	CSDE1
SPATA2	3.41911e-10	1.54026	0.074	0.014	4.62502e-06	AD	SPATA2
ISCA1	3.43653e-10	1.31759	0.1	0.026	4.64859e-06	AD	ISCA1
PRDM2	3.4453e-10	1.56523	0.078	0.016	4.66046e-06	AD	PRDM2
TMEM38A	3.64418e-10	1.69155	0.072	0.013	4.92948e-06	AD	TMEM38A
NDN	3.75105e-10	1.60537	0.076	0.015	5.07404e-06	AD	NDN
MAP6	3.8073e-10	0.63161	0.195	0.08	5.15013e-06	AD	MAP6
LSM14B	3.86529e-10	0.869743	0.135	0.045	5.22857e-06	AD	LSM14B
CAMKV	3.86556e-10	1.5506	0.076	0.015	5.22895e-06	AD	CAMKV
GNL1	3.90469e-10	1.33153	0.078	0.016	5.28187e-06	AD	GNL1
UQCRC1	3.9773e-10	0.866904	0.175	0.069	5.38009e-06	AD	UQCRC1
ZNRF3	3.97912e-10	0.179726	0.313	0.149	5.38256e-06	AD	ZNRF3
CTTN	3.98301e-10	1.43114	0.094	0.023	5.38782e-06	AD	CTTN
RAB21	4.0112e-10	1.45194	0.076	0.015	5.42595e-06	AD	RAB21
FAM8A1	4.10907e-10	2.28782	0.054	0.006	5.55833e-06	AD	FAM8A1
MBOAT7	4.12493e-10	1.0103	0.145	0.051	5.57979e-06	AD	MBOAT7
CAB39L	4.32244e-10	0.428071	0.245	0.111	5.84697e-06	AD	CAB39L
APPL1	4.35442e-10	2.69549	0.056	0.007	5.89023e-06	AD	APPL1
SYT17	4.41294e-10	0.216087	0.293	0.138	5.96938e-06	AD	SYT17
ZNF703	4.46055e-10	2.40147	0.056	0.007	6.03379e-06	AD	ZNF703
SSR1	4.46323e-10	1.12272	0.153	0.056	6.03741e-06	AD	SSR1
NARF	4.46894e-10	2.97987	0.046	0.003	6.04514e-06	AD	NARF
SP3	4.77401e-10	2.18	0.056	0.007	6.4578e-06	AD	SP3
NAB1	4.86532e-10	0.856124	0.129	0.042	6.58131e-06	AD	NAB1
PHB2	4.9387e-10	2.23526	0.056	0.007	6.68058e-06	AD	PHB2
PIK3C2A	5.04449e-10	1.18656	0.106	0.03	6.82369e-06	AD	PIK3C2A
VAMP3	5.08017e-10	2.15334	0.056	0.007	6.87194e-06	AD	VAMP3
SRGAP1	5.10274e-10	0.871741	0.094	0.023	6.90248e-06	AD	SRGAP1
FAS	5.11419e-10	1.3634	0.092	0.023	6.91796e-06	AD	FAS
TUBGCP6	5.20587e-10	1.01293	0.157	0.059	7.04199e-06	AD	TUBGCP6
EIF2AK1	5.25887e-10	2.65177	0.058	0.008	7.11367e-06	AD	EIF2AK1
ATP6V1A	5.26968e-10	0.622231	0.255	0.119	7.1283e-06	AD	ATP6V1A
CAPN1	5.2835e-10	1.21699	0.114	0.034	7.147e-06	AD	CAPN1
SELENON	5.29981e-10	2.24143	0.056	0.007	7.16905e-06	AD	SELENON
SIK2	5.31686e-10	1.42184	0.09	0.022	7.19212e-06	AD	SIK2
NRBP21	5.43394e-10	0.227892	0.259	0.117	7.35049e-06	AD	NRBP2
OS9	5.44421e-10	0.814571	0.133	0.044	7.36438e-06	AD	OS9
OAZ1	5.52419e-10	3.56489	0.04	0.002	7.47258e-06	AD	OAZ1
INPP4A	5.70069e-10	0.987888	0.147	0.053	7.71132e-06	AD	INPP4A
SEC23A	5.70862e-10	1.7993	0.084	0.019	7.72205e-06	AD	SEC23A
HSDL2	5.7409e-10	0.619349	0.175	0.069	7.76571e-06	AD	HSDL2
PSMA1	5.74208e-10	0.562097	0.239	0.109	7.76731e-06	AD	PSMA1
TSC22D4	5.82918e-10	0.842113	0.106	0.03	7.88514e-06	AD	TSC22D4
RING1	5.91577e-10	0.421282	0.239	0.107	8.00226e-06	AD	RING1
ARMC1	5.97431e-10	2.19784	0.058	0.008	8.08145e-06	AD	ARMC1
MAPRE3	6.03188e-10	0.209094	0.454	0.235	8.15932e-06	AD	MAPRE3
MXRA7	6.11418e-10	0.337536	0.279	0.13	8.27065e-06	AD	MXRA7
CABIN1	6.32109e-10	2.24542	0.06	0.009	8.55054e-06	AD	CABIN1
ATG9A	6.33086e-10	1.39035	0.098	0.026	8.56375e-06	AD	ATG9A
ARL6IP5	6.36129e-10	0.720475	0.213	0.092	8.60492e-06	AD	ARL6IP5
TSPYL1	6.46857e-10	0.868529	0.157	0.058	8.75003e-06	AD	TSPYL1
NAB2	6.49545e-10	3.1779	0.048	0.004	8.7864e-06	AD	NAB2
KCTD17	6.61108e-10	1.45664	0.1	0.027	8.94281e-06	AD	KCTD17
AP3D1	6.64433e-10	0.28442	0.345	0.174	8.98778e-06	AD	AP3D1
AP1M1	6.70286e-10	2.25049	0.06	0.009	9.06696e-06	AD	AP1M1
ZMAT3	6.75664e-10	2.02937	0.06	0.009	9.1397e-06	AD	ZMAT3
TOP1	6.95393e-10	1.10641	0.131	0.044	9.40658e-06	AD	TOP1
MMD2	7.03742e-10	0.980953	0.141	0.05	9.51952e-06	AD	MMD2
UPF1	7.0438e-10	2.8352	0.048	0.004	9.52815e-06	AD	UPF1
CTNND1	7.07807e-10	2.23398	0.062	0.01	9.5745e-06	AD	CTNND1
SELENOM	7.30664e-10	2.23833	0.064	0.01	9.8837e-06	AD	SELENOM
ZBTB18	7.37545e-10	0.567107	0.289	0.141	9.97677e-06	AD	ZBTB18
ARHGEF11	7.37967e-10	0.660182	0.149	0.054	9.98248e-06	AD	ARHGEF11
RGL2	7.54784e-10	1.01001	0.1	0.027	1.021e-05	AD	RGL2
LRCH3	7.58997e-10	2.1053	0.064	0.01	1.0267e-05	AD	LRCH3
ARHGEF17	7.62723e-10	0.52574	0.227	0.101	1.03174e-05	AD	ARHGEF17
TUT4	7.62747e-10	1.3451	0.082	0.018	1.03177e-05	AD	TUT4
SPRYD3	7.67012e-10	2.01075	0.068	0.012	1.03754e-05	AD	SPRYD3
TK2	7.70628e-10	2.11286	0.064	0.01	1.04243e-05	AD	TK2
FBXO7	7.70628e-10	2.0051	0.064	0.01	1.04243e-05	AD	FBXO7
TXNL1	7.73766e-10	0.625701	0.213	0.092	1.04667e-05	AD	TXNL1
CLUH	7.79123e-10	1.28427	0.062	0.01	1.05392e-05	AD	CLUH
KDM3B	7.90403e-10	1.7026	0.076	0.016	1.06918e-05	AD	KDM3B
PNMT	7.96826e-10	1.75548	0.074	0.015	1.07787e-05	AD	PNMT
KIAA0100	8.13434e-10	1.66509	0.074	0.015	1.10033e-05	AD	KIAA0100
POMGNT2	8.21337e-10	1.12148	0.082	0.018	1.11102e-05	AD	POMGNT2
PRR12	8.38832e-10	1.65603	0.064	0.01	1.13469e-05	AD	PRR12
CREBL2	8.43539e-10	1.69758	0.072	0.014	1.14106e-05	AD	CREBL2
RTN2	8.44725e-10	5.64211	0.036	0.001	1.14266e-05	AD	RTN2
SLC25A4	8.48753e-10	0.932667	0.149	0.055	1.14811e-05	AD	SLC25A4
PITPNM2	8.63655e-10	0.809128	0.114	0.034	1.16827e-05	AD	PITPNM2
KLF9	8.74868e-10	1.73966	0.07	0.013	1.18343e-05	AD	KLF9
SCAP	8.80943e-10	4.52437	0.036	0.001	1.19165e-05	AD	SCAP
PPP1R15B	9.36896e-10	3.21328	0.042	0.003	1.26734e-05	AD	PPP1R15B
ZFP36L2	9.40526e-10	0.470712	0.255	0.119	1.27225e-05	AD	ZFP36L2
GID8	9.69771e-10	1.40157	0.076	0.016	1.31181e-05	AD	GID8
DNAJC15	9.79135e-10	2.85342	0.042	0.003	1.32448e-05	AD	DNAJC15
MAML21	1.00675e-09	0.346668	0.151	0.055	1.36182e-05	AD	MAML2
SNX21	1.06672e-09	0.33257	0.173	0.068	1.44295e-05	AD	SNX21
TAF7	1.08514e-09	1.33196	0.092	0.023	1.46787e-05	AD	TAF7
TTC12	1.0891e-09	1.06524	0.12	0.038	1.47323e-05	AD	TTC12
COL21A1	1.09826e-09	0.746562	0.179	0.073	1.48562e-05	AD	COL21A1
ENTPD6	1.12373e-09	0.862091	0.161	0.063	1.52007e-05	AD	ENTPD6
HS6ST1	1.12882e-09	0.235391	0.289	0.138	1.52695e-05	AD	HS6ST1
STRAP	1.13554e-09	1.40159	0.116	0.036	1.53605e-05	AD	STRAP
ACACB	1.14986e-09	0.741927	0.251	0.12	1.55541e-05	AD	ACACB
KLHL22	1.16024e-09	1.24713	0.102	0.029	1.56946e-05	AD	KLHL22
MSI21	1.16106e-09	0.248224	0.598	0.354	1.57057e-05	AD	MSI2
PPP1CB	1.17515e-09	0.411766	0.245	0.112	1.58962e-05	AD	PPP1CB
ITSN11	1.18288e-09	0.239579	0.181	0.072	1.60009e-05	AD	ITSN1
GAREM1	1.19303e-09	1.14746	0.09	0.023	1.61382e-05	AD	GAREM1
PRMT2	1.21885e-09	0.883845	0.179	0.074	1.64874e-05	AD	PRMT2
SMARCA2	1.22186e-09	0.478244	0.217	0.095	1.65281e-05	AD	SMARCA2
NDUFS3	1.22687e-09	1.12585	0.104	0.03	1.65958e-05	AD	NDUFS3
DENND4B	1.23254e-09	2.14425	0.052	0.006	1.66726e-05	AD	DENND4B
LSM14A	1.2357e-09	1.08151	0.125	0.042	1.67154e-05	AD	LSM14A
C20orf96	1.23777e-09	2.89788	0.054	0.007	1.67433e-05	AD	C20orf96
DEK	1.24207e-09	0.449	0.255	0.119	1.68015e-05	AD	DEK
SNU13	1.26017e-09	1.22526	0.102	0.029	1.70464e-05	AD	SNU13
SRSF51	1.27697e-09	0.279405	0.635	0.36	1.72736e-05	AD	SRSF5
SLC18B1	1.28012e-09	1.19885	0.133	0.047	1.73161e-05	AD	SLC18B1
CSGALNACT1	1.29495e-09	0.265083	0.197	0.082	1.75168e-05	AD	CSGALNACT1
MTDH	1.30165e-09	0.826755	0.157	0.06	1.76074e-05	AD	MTDH
NT5C2	1.31201e-09	0.590007	0.203	0.088	1.77475e-05	AD	NT5C2
NTRK3	1.34534e-09	0.354353	0.309	0.154	1.81984e-05	AD	NTRK3
HTT	1.34985e-09	0.846726	0.151	0.056	1.82594e-05	AD	HTT
STX1B	1.43059e-09	0.299088	0.307	0.148	1.93517e-05	AD	STX1B
EIF4G1	1.43155e-09	0.302599	0.408	0.218	1.93646e-05	AD	EIF4G1
IL6ST1	1.43567e-09	0.411254	0.347	0.176	1.94203e-05	AD	IL6ST
UBE2K	1.48908e-09	1.04138	0.112	0.034	2.01427e-05	AD	UBE2K
POLR2A	1.50868e-09	3.1459	0.044	0.003	2.04079e-05	AD	POLR2A
ADGRL1	1.54808e-09	2.40438	0.044	0.003	2.09409e-05	AD	ADGRL1
RAMP1	1.63327e-09	0.222645	0.606	0.348	2.20932e-05	AD	RAMP1
PGGHG	1.65931e-09	0.980789	0.086	0.021	2.24455e-05	AD	PGGHG
TP53BP2	1.68571e-09	0.844368	0.161	0.063	2.28025e-05	AD	TP53BP2
KCMF1	1.70513e-09	1.8785	0.078	0.017	2.30653e-05	AD	KCMF1
WIPF3	1.71672e-09	4.04391	0.038	0.002	2.3222e-05	AD	WIPF3
SNX33	1.7327e-09	1.62586	0.056	0.008	2.34382e-05	AD	SNX33
PREX2	1.74537e-09	0.101118	0.303	0.145	2.36096e-05	AD	PREX2
PRR7	1.78544e-09	3.5573	0.038	0.002	2.41517e-05	AD	PRR7
GMPS	1.81182e-09	1.04273	0.122	0.04	2.45085e-05	AD	GMPS
SLC25A11	1.81928e-09	0.933874	0.133	0.047	2.46094e-05	AD	SLC25A11
NEFL	1.82378e-09	0.591298	0.189	0.078	2.46703e-05	AD	NEFL
PDPK1	1.83693e-09	1.04532	0.108	0.032	2.48482e-05	AD	PDPK1
LYNX1	1.84134e-09	2.29474	0.058	0.009	2.49079e-05	AD	LYNX1
MARCKS	1.84255e-09	0.311839	0.691	0.423	2.49241e-05	AD	MARCKS
RBBP6	1.87351e-09	0.919447	0.129	0.044	2.53429e-05	AD	RBBP6
DENND5A	1.90745e-09	2.27946	0.062	0.01	2.58021e-05	AD	DENND5A
BAG31	1.91653e-09	0.305883	0.323	0.163	2.59249e-05	AD	BAG3
TALDO1	1.92282e-09	1.87616	0.072	0.015	2.60099e-05	AD	TALDO1
PCNX1	1.92385e-09	3.32817	0.046	0.004	2.60239e-05	AD	PCNX1
MDFIC	1.93391e-09	2.16499	0.062	0.01	2.616e-05	AD	MDFIC
MYBBP1A	1.97807e-09	3.24573	0.046	0.004	2.67573e-05	AD	MYBBP1A
RBM17	2.00287e-09	2.11608	0.06	0.01	2.70928e-05	AD	RBM17
RNF44	2.00789e-09	2.016	0.062	0.01	2.71608e-05	AD	RNF44
ZNF644	2.00883e-09	3.06593	0.046	0.004	2.71735e-05	AD	ZNF644
MAP3K5	2.03409e-09	0.308528	0.273	0.131	2.75152e-05	AD	MAP3K5
TPM1	2.04454e-09	0.842105	0.131	0.045	2.76566e-05	AD	TPM1
MKNK2	2.06137e-09	0.745987	0.108	0.032	2.78841e-05	AD	MKNK2
KAT6B	2.06549e-09	0.17461	0.532	0.289	2.79399e-05	AD	KAT6B
RAB35	2.07594e-09	2.0962	0.06	0.01	2.80812e-05	AD	RAB35
DENND6B	2.07685e-09	0.700159	0.153	0.058	2.80935e-05	AD	DENND6B
GTF2F1	2.0875e-09	1.38129	0.08	0.018	2.82376e-05	AD	GTF2F1
JAM2	2.09508e-09	1.95112	0.062	0.01	2.83401e-05	AD	JAM2
HIPK1	2.10295e-09	2.07854	0.062	0.01	2.84465e-05	AD	HIPK1
WASL	2.13659e-09	1.70604	0.074	0.016	2.89017e-05	AD	WASL
TMEM94	2.13984e-09	0.736822	0.114	0.036	2.89457e-05	AD	TMEM94
SH3GLB1	2.16471e-09	0.861304	0.131	0.045	2.9282e-05	AD	SH3GLB1
ROGDI	2.19937e-09	1.54656	0.076	0.017	2.97508e-05	AD	ROGDI
HSPD1	2.1998e-09	0.73492	0.173	0.07	2.97567e-05	AD	HSPD1
TCAF1	2.21934e-09	1.68499	0.072	0.015	3.0021e-05	AD	TCAF1
PLEKHB2	2.23536e-09	1.21437	0.094	0.025	3.02378e-05	AD	PLEKHB2
STX5	2.24081e-09	1.45063	0.074	0.016	3.03115e-05	AD	STX5
SRF	2.26296e-09	1.63692	0.07	0.014	3.0611e-05	AD	SRF
DNAJA1	2.28908e-09	1.71916	0.07	0.014	3.09643e-05	AD	DNAJA1
AURKAIP1	2.29737e-09	0.931074	0.127	0.043	3.10765e-05	AD	AURKAIP1
THOP1	2.4783e-09	1.13005	0.094	0.025	3.3524e-05	AD	THOP1
SPATS2L	2.5248e-09	1.23462	0.076	0.017	3.4153e-05	AD	SPATS2L
FKBP51	2.55233e-09	1.07515	0.149	0.057	3.45254e-05	AD	FKBP5
AGO1	2.56349e-09	1.67666	0.066	0.012	3.46763e-05	AD	AGO1
DCTN2	2.56543e-09	0.613719	0.171	0.069	3.47026e-05	AD	DCTN2
ATXN2	2.57093e-09	0.915399	0.127	0.043	3.4777e-05	AD	ATXN2
NDUFB9	2.58873e-09	1.32377	0.114	0.036	3.50178e-05	AD	NDUFB9
BRD2	2.61416e-09	0.424938	0.281	0.139	3.53617e-05	AD	BRD2
BOP1	2.62765e-09	2.95826	0.048	0.005	3.55443e-05	AD	BOP1
TMEM9	2.6372e-09	0.636417	0.217	0.098	3.56734e-05	AD	TMEM9
NDUFS1	2.69298e-09	0.711484	0.181	0.076	3.6428e-05	AD	NDUFS1
NAPG	2.69635e-09	0.81238	0.173	0.071	3.64736e-05	AD	NAPG
MTOR	2.74698e-09	2.64706	0.048	0.005	3.71584e-05	AD	MTOR
CRCP	2.75512e-09	2.49125	0.048	0.005	3.72685e-05	AD	CRCP
ZNF516	2.78949e-09	1.21584	0.1	0.029	3.77335e-05	AD	ZNF516
CAPZA2	2.80608e-09	0.374887	0.367	0.197	3.79578e-05	AD	CAPZA2
TMEM158	2.81192e-09	5.23447	0.034	0.001	3.80369e-05	AD	TMEM158
VAV2	2.88008e-09	2.50258	0.048	0.005	3.89588e-05	AD	VAV2
CEP68	2.9139e-09	3.68316	0.04	0.003	3.94163e-05	AD	CEP68
POLG	2.96336e-09	3.51602	0.04	0.003	4.00853e-05	AD	POLG
SYF2	2.97335e-09	3.5253	0.04	0.003	4.02205e-05	AD	SYF2
KPNA1	2.9752e-09	2.11469	0.048	0.005	4.02456e-05	AD	KPNA1
KPNB1	2.99541e-09	1.0766	0.116	0.037	4.05189e-05	AD	KPNB1
ZNF609	3.01294e-09	0.238039	0.494	0.269	4.0756e-05	AD	ZNF609
ZHX2	3.02649e-09	0.549848	0.122	0.04	4.09393e-05	AD	ZHX2
HIPK3	3.03398e-09	3.29035	0.04	0.003	4.10406e-05	AD	HIPK3
PIK3IP1	3.11762e-09	0.866314	0.12	0.039	4.21721e-05	AD	PIK3IP1
CDH4	3.17396e-09	0.810492	0.149	0.056	4.29341e-05	AD	CDH4
MED13L	3.27788e-09	1.1932	0.088	0.023	4.43398e-05	AD	MED13L
CAND1	3.32309e-09	0.999516	0.11	0.034	4.49514e-05	AD	CAND1
RAB2A	3.34803e-09	0.342888	0.317	0.159	4.52888e-05	AD	RAB2A
VANGL2	3.36432e-09	0.799162	0.137	0.05	4.55091e-05	AD	VANGL2
IPO9	3.49898e-09	2.43373	0.05	0.006	4.73308e-05	AD	IPO9
MCFD21	3.54894e-09	0.45233	0.311	0.158	4.80065e-05	AD	MCFD2
TRAF7	3.55929e-09	2.14967	0.05	0.006	4.81465e-05	AD	TRAF7
NCOR1	3.5832e-09	0.939245	0.122	0.041	4.847e-05	AD	NCOR1
AQP1	3.64512e-09	0.25224	0.946	0.805	4.93075e-05	AD	AQP1
HSD17B4	3.65684e-09	2.12538	0.05	0.006	4.94661e-05	AD	HSD17B4
ADRA1A	3.76065e-09	0.312853	0.323	0.165	5.08702e-05	AD	ADRA1A
PCMT1	3.78813e-09	0.579302	0.231	0.108	5.1242e-05	AD	PCMT1
HSBP1	4.07709e-09	0.788311	0.165	0.067	5.51508e-05	AD	HSBP1
GTF3C1	4.17432e-09	0.765076	0.159	0.063	5.6466e-05	AD	GTF3C1
WDR1	4.25441e-09	1.20455	0.104	0.031	5.75493e-05	AD	WDR1
HP1BP3	4.42567e-09	0.301559	0.452	0.249	5.9866e-05	AD	HP1BP3
TLN21	4.43951e-09	0.339799	0.173	0.07	6.00532e-05	AD	TLN2
WDR47	4.4864e-09	1.25936	0.08	0.019	6.06876e-05	AD	WDR47
RAB10	4.50974e-09	0.532641	0.199	0.087	6.10032e-05	AD	RAB10
UHMK1	4.51463e-09	3.23514	0.042	0.003	6.10694e-05	AD	UHMK1
GPR137B	4.59901e-09	0.412925	0.271	0.133	6.22108e-05	AD	GPR137B
CHD4	4.68702e-09	0.536506	0.155	0.06	6.34013e-05	AD	CHD4
ANKLE2	4.73606e-09	2.57917	0.042	0.003	6.40647e-05	AD	ANKLE2
CGNL1	4.75119e-09	2.57123	0.042	0.003	6.42693e-05	AD	CGNL1
ARVCF	4.776e-09	0.858573	0.151	0.059	6.4605e-05	AD	ARVCF
KLC2	4.78419e-09	2.23705	0.054	0.008	6.47157e-05	AD	KLC2
TBRG1	4.86817e-09	2.39043	0.056	0.009	6.58517e-05	AD	TBRG1
COX5B	4.91329e-09	0.253796	0.444	0.241	6.6462e-05	AD	COX5B
LCOR	4.9331e-09	1.94602	0.054	0.008	6.67301e-05	AD	LCOR
C2orf74	5.02572e-09	0.720675	0.183	0.079	6.79829e-05	AD	C2orf74
RAB11FIP3	5.05928e-09	0.344774	0.337	0.175	6.84369e-05	AD	RAB11FIP3
PRPF6	5.08403e-09	0.742534	0.161	0.064	6.87717e-05	AD	PRPF6
ATG7	5.09576e-09	1.6477	0.074	0.017	6.89303e-05	AD	ATG7
DHX15	5.11045e-09	2.307	0.058	0.01	6.9129e-05	AD	DHX15
YME1L1	5.28932e-09	1.9255	0.056	0.009	7.15487e-05	AD	YME1L1
NDUFV1	5.39468e-09	0.34721	0.267	0.129	7.29739e-05	AD	NDUFV1
SIX5	5.45623e-09	2.02989	0.056	0.009	7.38064e-05	AD	SIX5
PSMD14	5.45771e-09	2.12249	0.062	0.011	7.38265e-05	AD	PSMD14
SETX	5.46263e-09	4.14262	0.036	0.002	7.3893e-05	AD	SETX
ERCC3	5.46429e-09	2.13352	0.062	0.011	7.39154e-05	AD	ERCC3
ANXA7	5.46572e-09	0.712407	0.155	0.061	7.39348e-05	AD	ANXA7
UNG	5.56848e-09	0.577194	0.112	0.036	7.53248e-05	AD	UNG
RELA	5.58012e-09	3.81572	0.036	0.002	7.54823e-05	AD	RELA
SH3GLB2	5.60895e-09	0.313769	0.428	0.237	7.58723e-05	AD	SH3GLB2
TCEA2	5.62837e-09	1.32631	0.076	0.017	7.6135e-05	AD	TCEA2
MYO6	5.63668e-09	0.766791	0.137	0.05	7.62474e-05	AD	MYO6
DCAF11	5.6598e-09	3.75352	0.036	0.002	7.65602e-05	AD	DCAF11
NSD1	5.71366e-09	1.86645	0.066	0.013	7.72887e-05	AD	NSD1
SUMF2	5.76707e-09	1.60262	0.07	0.015	7.80112e-05	AD	SUMF2
UQCR11	5.77045e-09	1.45165	0.074	0.017	7.80569e-05	AD	UQCR11
AP5B1	5.87682e-09	1.485	0.07	0.015	7.94957e-05	AD	AP5B1
GSK3A	5.92132e-09	3.25816	0.044	0.004	8.00977e-05	AD	GSK3A
GAB2	5.93574e-09	1.40956	0.07	0.015	8.02927e-05	AD	GAB2
ZNF483	5.93784e-09	0.551249	0.223	0.103	8.03211e-05	AD	ZNF483
FMNL21	6.10785e-09	0.294154	0.382	0.201	8.26209e-05	AD	FMNL2
ANKRD17	6.14781e-09	1.8819	0.062	0.011	8.31615e-05	AD	ANKRD17
CNDP2	6.24614e-09	0.747501	0.167	0.069	8.44915e-05	AD	CNDP2
CLTB	6.31487e-09	0.934152	0.116	0.038	8.54212e-05	AD	CLTB
ANKS1B	6.35388e-09	1.3184	0.088	0.023	8.59489e-05	AD	ANKS1B
VPS13D	6.371e-09	2.83449	0.044	0.004	8.61806e-05	AD	VPS13D
MAVS	6.62998e-09	0.931048	0.074	0.017	8.96837e-05	AD	MAVS
RMDN3	6.64584e-09	1.55342	0.084	0.022	8.98983e-05	AD	RMDN3
ANKRD13D	6.75755e-09	1.45421	0.068	0.014	9.14094e-05	AD	ANKRD13D
VOPP1	6.90359e-09	0.803971	0.137	0.051	9.33849e-05	AD	VOPP1
PSMC5	7.002e-09	0.76661	0.151	0.059	9.47161e-05	AD	PSMC5
MSL1	7.06627e-09	0.394314	0.237	0.11	9.55855e-05	AD	MSL1
NUDCD3	7.15832e-09	0.400645	0.221	0.102	9.68306e-05	AD	NUDCD3
PHC3	7.21077e-09	1.30183	0.102	0.031	9.75401e-05	AD	PHC3
MRNIP	7.37761e-09	1.04674	0.11	0.036	9.9797e-05	AD	MRNIP
MAGI2	7.40534e-09	0.793846	0.116	0.038	0.000100172	AD	MAGI2
AMY2B	7.60144e-09	0.470115	0.279	0.14	0.000102825	AD	AMY2B
NR2F1	7.79857e-09	0.238236	0.406	0.222	0.000105491	AD	NR2F1
CARM1	8.04314e-09	1.14913	0.102	0.031	0.0001088	AD	CARM1
ANAPC16	8.14446e-09	0.702774	0.211	0.098	0.00011017	AD	ANAPC16
ZNF641	8.37182e-09	2.65802	0.046	0.005	0.000113246	AD	ZNF641
GNG12	8.37292e-09	0.558826	0.235	0.113	0.000113261	AD	GNG12
CDC42SE1	8.46551e-09	1.56866	0.08	0.02	0.000114513	AD	CDC42SE1
UBE2B	8.53023e-09	0.678621	0.199	0.089	0.000115388	AD	UBE2B
PDLIM4	8.72379e-09	0.755465	0.137	0.051	0.000118007	AD	PDLIM4
PLCG1	8.75746e-09	0.242954	0.183	0.077	0.000118462	AD	PLCG1
MATR3	8.77421e-09	0.44111	0.187	0.08	0.000118689	AD	MATR3
ARHGAP26	9.0918e-09	0.515314	0.203	0.092	0.000122985	AD	ARHGAP26
HIST1H1E	9.1291e-09	3.84089	0.038	0.003	0.000123489	AD	HIST1H1E
GRM3	9.2519e-09	0.728307	0.129	0.047	0.00012515	AD	GRM3
ACAA1	9.26467e-09	1.05496	0.11	0.036	0.000125323	AD	ACAA1
DCTD	9.2823e-09	0.770943	0.12	0.041	0.000125562	AD	DCTD
BCAS4	9.29021e-09	0.621195	0.139	0.052	0.000125669	AD	BCAS4
DIO2	9.3292e-09	0.424601	0.149	0.057	0.000126196	AD	DIO2
DDX5	9.59764e-09	0.27562	0.751	0.436	0.000129827	AD	DDX5
SESN2	9.62938e-09	2.21301	0.038	0.003	0.000130257	AD	SESN2
SFSWAP	9.62938e-09	3.06603	0.038	0.003	0.000130257	AD	SFSWAP
MTCH1	9.6392e-09	0.810897	0.187	0.084	0.000130389	AD	MTCH1
NAXD	9.66151e-09	2.96971	0.038	0.003	0.000130691	AD	NAXD
USP14	9.66657e-09	1.31508	0.09	0.025	0.00013076	AD	USP14
SESN3	9.69625e-09	0.405693	0.273	0.136	0.000131161	AD	SESN3
PACS1	9.78133e-09	0.718262	0.135	0.05	0.000132312	AD	PACS1
NEK11	9.87598e-09	1.64213	0.078	0.019	0.000133592	AD	NEK11
FOXG1	9.89611e-09	0.516912	0.209	0.096	0.000133865	AD	FOXG1
SSBP1	1.00253e-08	0.367115	0.289	0.148	0.000135612	AD	SSBP1
ABL1	1.00993e-08	2.35146	0.048	0.006	0.000136613	AD	ABL1
FOXRED2	1.03618e-08	0.773518	0.1	0.03	0.000140164	AD	FOXRED2
DPCD	1.04784e-08	0.83108	0.11	0.036	0.000141741	AD	DPCD
PON21	1.0495e-08	0.319113	0.733	0.454	0.000141966	AD	PON2
LDHD	1.05339e-08	2.09996	0.048	0.006	0.000142492	AD	LDHD
SDF4	1.05807e-08	0.534102	0.201	0.09	0.000143125	AD	SDF4
POU3F21	1.08571e-08	0.235859	0.269	0.13	0.000146864	AD	POU3F2
FBXO44	1.08913e-08	0.215612	0.568	0.318	0.000147326	AD	FBXO44
CCDC40	1.09387e-08	1.86346	0.072	0.017	0.000147967	AD	CCDC40
RSRC2	1.09868e-08	1.82948	0.048	0.006	0.000148618	AD	RSRC2
NRARP	1.12991e-08	1.02859	0.048	0.006	0.000152843	AD	NRARP
CKAP5	1.13134e-08	0.470156	0.189	0.083	0.000153036	AD	CKAP5
ACTR1A	1.13483e-08	0.64769	0.175	0.075	0.000153509	AD	ACTR1A
HIST1H4B	1.14331e-08	1.03733	0.078	0.019	0.000154655	AD	HIST1H4B
NADK2	1.18048e-08	0.388191	0.38	0.211	0.000159684	AD	NADK2
SPRY21	1.18804e-08	0.484305	0.171	0.072	0.000160706	AD	SPRY2
TMEM240	1.23472e-08	2.1836	0.05	0.007	0.000167021	AD	TMEM240
CTDSPL	1.23532e-08	0.528984	0.187	0.082	0.000167102	AD	CTDSPL
AKTIP	1.23897e-08	1.0581	0.106	0.034	0.000167596	AD	AKTIP
SAP181	1.24111e-08	0.33498	0.271	0.132	0.000167885	AD	SAP18
KMT2B	1.24312e-08	1.91622	0.05	0.007	0.000168157	AD	KMT2B
SH3PXD2A	1.25667e-08	1.96125	0.05	0.007	0.000169989	AD	SH3PXD2A
ZSCAN18	1.25689e-08	0.271193	0.47	0.265	0.00017002	AD	ZSCAN18
TRAK11	1.29458e-08	0.196096	0.4	0.219	0.000175117	AD	TRAK1
S100A13	1.30251e-08	0.218209	0.598	0.336	0.00017619	AD	S100A13
TRAP1	1.32146e-08	0.535701	0.207	0.096	0.000178754	AD	TRAP1
MFF	1.32375e-08	0.739383	0.227	0.111	0.000179064	AD	MFF
CAB39	1.34185e-08	3.42667	0.04	0.003	0.000181512	AD	CAB39
SF3A1	1.36017e-08	1.53921	0.084	0.023	0.000183991	AD	SF3A1
TRAF3IP2	1.36074e-08	1.08124	0.086	0.023	0.000184067	AD	TRAF3IP2
ZC3H14	1.37085e-08	1.06888	0.104	0.033	0.000185434	AD	ZC3H14
TMCO1	1.39264e-08	1.68273	0.07	0.016	0.000188382	AD	TMCO1
RXRB	1.39813e-08	3.21956	0.04	0.003	0.000189125	AD	RXRB
HDLBP	1.40908e-08	0.277797	0.4	0.215	0.000190607	AD	HDLBP
EXOSC10	1.41378e-08	0.881891	0.106	0.034	0.000191242	AD	EXOSC10
FGD6	1.42202e-08	0.816196	0.088	0.024	0.000192356	AD	FGD6
IDUA	1.4269e-08	2.24686	0.054	0.009	0.000193017	AD	IDUA
MAML1	1.44523e-08	1.90021	0.054	0.009	0.000195496	AD	MAML1
DPF2	1.5238e-08	1.79004	0.062	0.012	0.000206125	AD	DPF2
NSFL1C	1.54824e-08	1.51144	0.082	0.022	0.00020943	AD	NSFL1C
FXYD7	1.56451e-08	1.05877	0.104	0.033	0.000211631	AD	FXYD7
GNAZ	1.57581e-08	1.59842	0.066	0.014	0.000213159	AD	GNAZ
GAP43	1.57764e-08	1.89848	0.062	0.012	0.000213407	AD	GAP43
HLTF	1.58787e-08	1.27588	0.084	0.023	0.000214792	AD	HLTF
AVL9	1.58846e-08	1.9976	0.058	0.01	0.000214871	AD	AVL9
RIDA1	1.6129e-08	0.212718	0.4	0.222	0.000218176	AD	RIDA
DYNLL21	1.66476e-08	0.266198	0.641	0.368	0.000225193	AD	DYNLL2
NPRL3	1.6715e-08	1.53247	0.062	0.012	0.000226103	AD	NPRL3
FNDC4	1.67656e-08	0.577664	0.157	0.064	0.000226789	AD	FNDC4
UBL3	1.6804e-08	0.36164	0.285	0.143	0.000227308	AD	UBL3
VIM1	1.68614e-08	0.331093	0.55	0.309	0.000228084	AD	VIM
PUM1	1.69694e-08	1.61203	0.064	0.013	0.000229545	AD	PUM1
SIK3	1.71236e-08	1.06317	0.104	0.033	0.000231631	AD	SIK3
RHPN1	1.72947e-08	0.287465	0.396	0.217	0.000233946	AD	RHPN1
CACUL1	1.75538e-08	0.629561	0.157	0.064	0.000237451	AD	CACUL1
BCL2L21	1.75574e-08	0.198585	0.4	0.217	0.000237499	AD	BCL2L2
ATP2C1	1.76806e-08	0.985431	0.116	0.04	0.000239165	AD	ATP2C1
DUSP8	1.77261e-08	4.09012	0.034	0.002	0.000239781	AD	DUSP8
SNAP47	1.77475e-08	1.21514	0.092	0.027	0.00024007	AD	SNAP47
ARHGEF1	1.78795e-08	1.20107	0.066	0.014	0.000241856	AD	ARHGEF1
MNAT1	1.79254e-08	0.472833	0.181	0.078	0.000242477	AD	MNAT1
NT5DC3	1.80923e-08	1.15181	0.084	0.023	0.000244735	AD	NT5DC3
FBXL17	1.82487e-08	0.535139	0.197	0.089	0.00024685	AD	FBXL17
TRMT61A	1.83404e-08	3.14425	0.042	0.004	0.000248091	AD	TRMT61A
OSBP	1.83958e-08	2.97833	0.042	0.004	0.00024884	AD	OSBP
SENP3	1.84905e-08	3.51761	0.034	0.002	0.000250121	AD	SENP3
GNA13	1.89931e-08	0.715708	0.135	0.051	0.00025692	AD	GNA13
GOLPH3	1.90153e-08	2.70085	0.042	0.004	0.00025722	AD	GOLPH3
LUC7L	1.9142e-08	0.578055	0.223	0.108	0.000258934	AD	LUC7L
RAB5B	1.9262e-08	0.282322	0.307	0.158	0.000260557	AD	RAB5B
EMILIN1	1.93165e-08	1.76372	0.076	0.019	0.000261295	AD	EMILIN1
NDUFB21	1.95698e-08	0.475373	0.263	0.134	0.000264721	AD	NDUFB2
ZFYVE21	1.97736e-08	0.103063	0.384	0.206	0.000267477	AD	ZFYVE21
NDUFA3	2.01075e-08	0.596761	0.189	0.085	0.000271994	AD	NDUFA3
GPS1	2.0315e-08	0.553974	0.205	0.095	0.000274801	AD	GPS1
EPS15L1	2.03665e-08	0.48262	0.149	0.06	0.000275497	AD	EPS15L1
BRK11	2.08302e-08	0.329945	0.347	0.184	0.00028177	AD	BRK1
FBXO21	2.11017e-08	1.11829	0.092	0.027	0.000285443	AD	FBXO21
NOL3	2.14353e-08	1.13635	0.078	0.02	0.000289956	AD	NOL3
PRKCSH	2.14773e-08	0.91212	0.108	0.036	0.000290524	AD	PRKCSH
GRID1	2.19367e-08	1.16181	0.098	0.03	0.000296738	AD	GRID1
PRKAG2	2.20072e-08	1.69806	0.074	0.018	0.000297691	AD	PRKAG2
NWD11	2.25597e-08	0.255981	0.175	0.076	0.000305165	AD	NWD1
ECM2	2.2612e-08	1.35446	0.116	0.042	0.000305872	AD	ECM2
C4orf31	2.26338e-08	0.536875	0.211	0.098	0.000306167	AD	C4orf3
USP33	2.29512e-08	1.38055	0.088	0.025	0.000310461	AD	USP33
TMEM132B	2.30156e-08	0.900141	0.12	0.043	0.000311332	AD	TMEM132B
TOP2B	2.3335e-08	0.806431	0.141	0.056	0.000315652	AD	TOP2B
TUSC3	2.3517e-08	1.07726	0.08	0.021	0.000318115	AD	TUSC3
ZNF207	2.38462e-08	2.67462	0.044	0.005	0.000322567	AD	ZNF207
INO80E	2.41924e-08	2.68449	0.044	0.005	0.00032725	AD	INO80E
SERINC11	2.42133e-08	0.287783	0.594	0.338	0.000327534	AD	SERINC1
KHDC4	2.44024e-08	2.66568	0.044	0.005	0.000330091	AD	KHDC4
SRRT	2.50622e-08	0.773043	0.129	0.049	0.000339016	AD	SRRT
STXBP1	2.51877e-08	2.29796	0.044	0.005	0.000340715	AD	STXBP1
ZBTB7C	2.62642e-08	1.44319	0.074	0.018	0.000355276	AD	ZBTB7C
SAFB	2.63822e-08	0.576199	0.199	0.091	0.000356872	AD	SAFB
LYSMD2	2.65856e-08	1.11659	0.078	0.02	0.000359624	AD	LYSMD2
MAN1C1	2.68704e-08	0.374436	0.311	0.167	0.000363476	AD	MAN1C1
NME4	2.69373e-08	1.23427	0.076	0.019	0.000364381	AD	NME4
OSBPL1A	2.69443e-08	0.92135	0.098	0.03	0.000364475	AD	OSBPL1A
SYVN1	2.71416e-08	1.24121	0.112	0.039	0.000367145	AD	SYVN1
ZFAND6	2.80362e-08	0.806917	0.133	0.051	0.000379246	AD	ZFAND6
NR3C2	2.8109e-08	1.21761	0.076	0.019	0.00038023	AD	NR3C2
TNRC6B	2.84457e-08	0.989579	0.116	0.041	0.000384785	AD	TNRC6B
PSMD4	2.86273e-08	0.573829	0.195	0.089	0.000387241	AD	PSMD4
ZBTB11	2.87955e-08	3.78591	0.036	0.003	0.000389517	AD	ZBTB11
CREBBP	2.91785e-08	2.98689	0.036	0.003	0.000394697	AD	CREBBP
PRELP	2.92177e-08	2.13104	0.066	0.015	0.000395228	AD	PRELP
HMGN3	2.96156e-08	0.486899	0.205	0.096	0.00040061	AD	HMGN3
TRAPPC3	2.96779e-08	2.49095	0.046	0.006	0.000401453	AD	TRAPPC3
VPS72	2.96779e-08	2.38617	0.046	0.006	0.000401453	AD	VPS72
SLC25A16	2.96881e-08	0.766864	0.149	0.061	0.000401592	AD	SLC25A16
FOXO3	2.97394e-08	0.665318	0.155	0.064	0.000402285	AD	FOXO3
SPACA9	2.99532e-08	1.14359	0.092	0.028	0.000405177	AD	SPACA9
COL5A2	3.01575e-08	3.14141	0.036	0.003	0.000407941	AD	COL5A2
STX7	3.02707e-08	0.86428	0.104	0.034	0.000409472	AD	STX7
STAM2	3.0296e-08	1.4529	0.07	0.017	0.000409814	AD	STAM2
KLHDC2	3.03512e-08	1.42424	0.072	0.017	0.000410561	AD	KLHDC2
ZFHX3	3.06801e-08	2.019	0.046	0.006	0.00041501	AD	ZFHX3
NEURL1	3.08906e-08	4.56924	0.03	0.001	0.000417857	AD	NEURL1
PHF1	3.09138e-08	1.15594	0.072	0.017	0.000418171	AD	PHF1
PSMB5	3.09835e-08	1.56321	0.082	0.023	0.000419113	AD	PSMB5
PYURF	3.10606e-08	1.66695	0.07	0.017	0.000420156	AD	PYURF
FAM20B	3.12419e-08	4.20072	0.03	0.001	0.00042261	AD	FAM20B
TMX4	3.14328e-08	1.25507	0.106	0.036	0.000425192	AD	TMX4
RUBCNL	3.14783e-08	2.52529	0.03	0.001	0.000425808	AD	RUBCNL
DUSP3	3.1712e-08	1.30611	0.07	0.017	0.000428968	AD	DUSP3
HES6	3.17982e-08	1.10465	0.084	0.023	0.000430134	AD	HES6
VAPB	3.24775e-08	1.26907	0.092	0.028	0.000439323	AD	VAPB
COPA	3.26294e-08	1.23121	0.084	0.023	0.000441377	AD	COPA
EPN2	3.2765e-08	2.45247	0.048	0.007	0.000443212	AD	EPN2
PPP1R11	3.28527e-08	2.38095	0.048	0.007	0.000444399	AD	PPP1R11
DDX46	3.34727e-08	2.37272	0.058	0.011	0.000452786	AD	DDX46
MCF2L2	3.4055e-08	1.22575	0.072	0.017	0.000460662	AD	MCF2L2
ULK2	3.41578e-08	0.478807	0.179	0.079	0.000462053	AD	ULK2
ANKH	3.45639e-08	2.12494	0.048	0.007	0.000467546	AD	ANKH
SRSF4	3.4636e-08	1.64723	0.066	0.015	0.000468522	AD	SRSF4
RAC1	3.46453e-08	0.877045	0.155	0.066	0.000468648	AD	RAC1
SMAD9	3.46466e-08	1.61759	0.068	0.016	0.000468665	AD	SMAD9
SNRNP200	3.48142e-08	1.18604	0.1	0.032	0.000470932	AD	SNRNP200
XPNPEP3	3.4926e-08	1.86682	0.062	0.013	0.000472444	AD	XPNPEP3
MRTO4	3.51396e-08	2.48619	0.052	0.009	0.000475333	AD	MRTO4
WNK2	3.52026e-08	0.249126	0.195	0.088	0.000476185	AD	WNK2
HMGCL	3.531e-08	2.0106	0.048	0.007	0.000477639	AD	HMGCL
ZNF512B	3.57843e-08	1.78534	0.048	0.007	0.000484054	AD	ZNF512B
GSTK1	3.58342e-08	1.40176	0.068	0.016	0.00048473	AD	GSTK1
BAHD1	3.60717e-08	1.92143	0.048	0.007	0.000487942	AD	BAHD1
IFT140	3.68281e-08	1.33558	0.068	0.016	0.000498174	AD	IFT140
PNRC2	3.84456e-08	1.84064	0.062	0.013	0.000520054	AD	PNRC2
GNG71	3.85002e-08	0.120399	0.61	0.345	0.000520792	AD	GNG7
RALGDS	3.87179e-08	0.702355	0.179	0.082	0.000523737	AD	RALGDS
PHF24	3.90335e-08	1.62972	0.064	0.014	0.000528007	AD	PHF24
C16orf58	3.9612e-08	1.49304	0.08	0.022	0.000535832	AD	C16orf58
TRRAP	3.96345e-08	1.35037	0.064	0.014	0.000536135	AD	TRRAP
HGS	3.9957e-08	0.375834	0.207	0.096	0.000540499	AD	HGS
MDM2	4.04726e-08	1.80589	0.06	0.012	0.000547473	AD	MDM2
MTA2	4.06571e-08	1.62923	0.06	0.012	0.000549969	AD	MTA2
MYORG	4.08601e-08	1.77843	0.052	0.009	0.000552715	AD	MYORG
PABPC4	4.14643e-08	1.36376	0.066	0.015	0.000560887	AD	PABPC4
MAP1A	4.17658e-08	0.265606	0.645	0.393	0.000564966	AD	MAP1A
CARF	4.18547e-08	1.44639	0.064	0.014	0.000566168	AD	CARF
CTSD	4.1983e-08	1.85889	0.05	0.008	0.000567904	AD	CTSD
KDSR	4.22136e-08	1.9016	0.052	0.009	0.000571023	AD	KDSR
B3GALT6	4.27561e-08	6.86031	0.026	0	0.000578361	AD	B3GALT6
SLC8A1	4.27561e-08	6.72972	0.026	0	0.000578361	AD	SLC8A1
FN1	4.27561e-08	6.8479	0.026	0	0.000578361	AD	FN1
TACC1	4.27561e-08	6.80115	0.026	0	0.000578361	AD	TACC1
ARHGAP23	4.32253e-08	3.20291	0.038	0.003	0.000584709	AD	ARHGAP23
NT5E	4.33437e-08	1.60992	0.056	0.01	0.00058631	AD	NT5E
EVI5L	4.3431e-08	1.71049	0.054	0.01	0.000587492	AD	EVI5L
RIPOR2	4.34515e-08	1.52188	0.062	0.013	0.000587769	AD	RIPOR2
YIPF3	4.37198e-08	1.66595	0.052	0.009	0.000591398	AD	YIPF3
TIMP2	4.37696e-08	0.635295	0.131	0.05	0.000592072	AD	TIMP2
VPS37B	4.44558e-08	2.96102	0.038	0.003	0.000601353	AD	VPS37B
IQSEC1	4.45946e-08	2.80155	0.038	0.003	0.000603231	AD	IQSEC1
CEBPG	4.46655e-08	1.68997	0.054	0.01	0.00060419	AD	CEBPG
VPS13B	4.52949e-08	2.82901	0.038	0.003	0.000612704	AD	VPS13B
CD109	4.55614e-08	1.14885	0.096	0.03	0.000616309	AD	CD109
EPRS	4.55758e-08	1.42258	0.058	0.011	0.000616503	AD	EPRS
RFTN2	4.56061e-08	0.199939	0.317	0.169	0.000616914	AD	RFTN2
ZNF710	4.61493e-08	1.87573	0.038	0.003	0.000624262	AD	ZNF710
PNPLA6	4.62209e-08	1.33628	0.06	0.012	0.00062523	AD	PNPLA6
NUFIP2	4.65451e-08	1.55439	0.056	0.01	0.000629616	AD	NUFIP2
ZNF608	4.77908e-08	0.381279	0.179	0.079	0.000646466	AD	ZNF608
POLR1D	4.78081e-08	0.875554	0.106	0.036	0.000646701	AD	POLR1D
TRAPPC5	4.90477e-08	0.528932	0.227	0.113	0.000663469	AD	TRAPPC5
SYBU	4.93788e-08	0.699671	0.129	0.05	0.000667948	AD	SYBU
IFT46	4.99827e-08	0.741209	0.122	0.045	0.000676116	AD	IFT46
ERGIC3	5.15043e-08	0.44892	0.229	0.113	0.000696699	AD	ERGIC3
GRSF1	5.16703e-08	0.408997	0.261	0.136	0.000698944	AD	GRSF1
LRRC24	5.46953e-08	1.23897	0.074	0.019	0.000739863	AD	LRRC24
TAX1BP3	5.5039e-08	1.12848	0.088	0.026	0.000744512	AD	TAX1BP3
RFX3	5.52376e-08	0.811858	0.122	0.045	0.000747199	AD	RFX3
PC	5.52913e-08	0.256579	0.179	0.079	0.000747925	AD	PC
OGDH	5.53419e-08	0.442897	0.175	0.078	0.00074861	AD	OGDH
RAP1GAP2	5.63149e-08	4.23925	0.032	0.002	0.000761772	AD	RAP1GAP2
PDGFA	5.71072e-08	2.36601	0.04	0.004	0.000772489	AD	PDGFA
ZNF800	5.8306e-08	2.78411	0.04	0.004	0.000788706	AD	ZNF800
ERBB4	5.88527e-08	0.444139	0.207	0.098	0.0007961	AD	ERBB4
NBN	5.91773e-08	2.31952	0.04	0.004	0.000800491	AD	NBN
ORAI2	5.9353e-08	2.70862	0.04	0.004	0.000802868	AD	ORAI2
GTF2H1	5.94453e-08	3.67063	0.032	0.002	0.000804117	AD	GTF2H1
FEM1A	5.9653e-08	3.53711	0.032	0.002	0.000806926	AD	FEM1A
TTYH2	5.99152e-08	1.41481	0.09	0.028	0.000810472	AD	TTYH2
KY	6.03628e-08	1.35637	0.074	0.019	0.000816528	AD	KY
POLDIP2	6.13711e-08	1.27354	0.074	0.019	0.000830167	AD	POLDIP2
TBKBP1	6.17309e-08	1.07312	0.074	0.019	0.000835033	AD	TBKBP1
TRAPPC12	6.23363e-08	1.29508	0.092	0.029	0.000843224	AD	TRAPPC12
XPO7	6.24194e-08	2.12511	0.04	0.004	0.000844347	AD	XPO7
PELP1	6.26044e-08	2.22181	0.04	0.004	0.00084685	AD	PELP1
ZNF853	6.279e-08	1.96426	0.04	0.004	0.000849361	AD	ZNF853
FIBIN	6.36428e-08	0.931754	0.129	0.05	0.000860897	AD	FIBIN
RUVBL2	6.37666e-08	1.38961	0.072	0.018	0.00086257	AD	RUVBL2
PPP2R1B	6.49933e-08	0.90404	0.094	0.03	0.000879164	AD	PPP2R1B
C7orf50	6.58936e-08	1.27297	0.09	0.028	0.000891343	AD	C7orf50
LAMB2	6.60667e-08	1.1293	0.104	0.036	0.000893685	AD	LAMB2
ME2	6.84709e-08	0.952974	0.133	0.054	0.000926206	AD	ME2
S100A10	6.89595e-08	0.946049	0.102	0.034	0.000932816	AD	S100A10
APBB3	6.99029e-08	0.874511	0.072	0.018	0.000945577	AD	APBB3
TPCN1	7.06482e-08	0.16583	0.351	0.191	0.000955658	AD	TPCN1
USH1C	7.0706e-08	0.409157	0.227	0.111	0.00095644	AD	USH1C
UQCRC2	7.12198e-08	0.32778	0.267	0.137	0.00096339	AD	UQCRC2
SLC25A3	7.14784e-08	0.436072	0.225	0.111	0.000966888	AD	SLC25A3
AHI1	7.19234e-08	1.78162	0.066	0.016	0.000972908	AD	AHI1
C12orf57	7.19452e-08	1.57711	0.068	0.017	0.000973202	AD	C12orf57
PLTP	7.27177e-08	0.281516	0.508	0.306	0.000983652	AD	PLTP
GAA	7.28264e-08	0.916964	0.1	0.033	0.000985122	AD	GAA
GZF1	7.43605e-08	2.22391	0.042	0.005	0.00100587	AD	GZF1
ZER1	7.50055e-08	0.834206	0.114	0.041	0.0010146	AD	ZER1
CDC16	7.50239e-08	0.750749	0.145	0.061	0.00101485	AD	CDC16
TESK1	7.54521e-08	2.63508	0.044	0.006	0.00102064	AD	TESK1
ZCCHC14	7.69325e-08	2.12117	0.042	0.005	0.00104067	AD	ZCCHC14
BTBD1	7.73489e-08	1.67077	0.066	0.016	0.0010463	AD	BTBD1
STK32C	7.87781e-08	1.47531	0.068	0.017	0.00106563	AD	STK32C
NUCB1	8.08268e-08	0.503473	0.167	0.073	0.00109334	AD	NUCB1
PRKCE	8.24984e-08	0.582082	0.145	0.06	0.00111596	AD	PRKCE
SMAD3	8.3477e-08	2.46603	0.044	0.006	0.00112919	AD	SMAD3
GPATCH8	8.348e-08	1.27798	0.068	0.017	0.00112923	AD	GPATCH8
SAT2	8.38281e-08	0.613545	0.195	0.093	0.00113394	AD	SAT2
MARCH2	8.48539e-08	2.44344	0.044	0.006	0.00114782	AD	MARCH2
UBE2D2	8.4888e-08	0.392889	0.247	0.123	0.00114828	AD	UBE2D2
MPST	8.49225e-08	1.24546	0.08	0.023	0.00114875	AD	MPST
XPNPEP1	8.56149e-08	1.18011	0.066	0.016	0.00115811	AD	XPNPEP1
RNF216	8.57203e-08	1.71328	0.064	0.015	0.00115954	AD	RNF216
TNRC6C	8.6018e-08	2.32648	0.044	0.006	0.00116357	AD	TNRC6C
PHYHD1	8.64549e-08	0.234182	0.496	0.302	0.00116948	AD	PHYHD1
ZNHIT6	8.69605e-08	2.20007	0.044	0.006	0.00117631	AD	ZNHIT6
DCAF6	8.69605e-08	2.26597	0.044	0.006	0.00117631	AD	DCAF6
GPR161	8.79217e-08	1.21562	0.078	0.022	0.00118932	AD	GPR161
STK38L	8.91178e-08	2.11482	0.044	0.006	0.0012055	AD	STK38L
TTC9	8.95997e-08	1.6846	0.064	0.015	0.00121202	AD	TTC9
RBM38	8.96041e-08	1.84195	0.044	0.006	0.00121208	AD	RBM38
BAIAP21	9.00991e-08	0.543092	0.191	0.089	0.00121877	AD	BAIAP2
UBQLN4	9.03145e-08	1.17183	0.078	0.022	0.00122168	AD	UBQLN4
D2HGDH	9.15755e-08	1.93646	0.044	0.006	0.00123874	AD	D2HGDH
CC2D1A	9.23255e-08	1.88523	0.044	0.006	0.00124889	AD	CC2D1A
CYP2U1	9.33348e-08	1.65688	0.044	0.006	0.00126254	AD	CYP2U1
RUBCN	9.40436e-08	1.2927	0.064	0.015	0.00127213	AD	RUBCN
DAXX	9.44204e-08	3.26706	0.034	0.003	0.00127723	AD	DAXX
RGS16	9.4729e-08	3.4166	0.034	0.003	0.0012814	AD	RGS16
CSNK1E	9.50385e-08	3.10384	0.034	0.003	0.00128559	AD	CSNK1E
PTEN	9.60014e-08	1.48493	0.076	0.021	0.00129861	AD	PTEN
PSMA3	9.60419e-08	2.47562	0.052	0.01	0.00129916	AD	PSMA3
UBR4	9.61816e-08	1.37481	0.076	0.021	0.00130105	AD	UBR4
ZFPL1	9.72325e-08	2.83038	0.034	0.003	0.00131526	AD	ZFPL1
ZBTB7B	9.76234e-08	2.07094	0.046	0.007	0.00132055	AD	ZBTB7B
UTP6	9.78801e-08	2.18759	0.046	0.007	0.00132402	AD	UTP6
TRAF3	9.85964e-08	0.647313	0.145	0.061	0.00133371	AD	TRAF3
AKT1	1.01322e-07	1.54135	0.062	0.014	0.00137058	AD	AKT1
WDR33	1.02071e-07	1.22967	0.064	0.015	0.00138071	AD	WDR33
TRIM8	1.02368e-07	0.166451	0.622	0.366	0.00138473	AD	TRIM8
BRD8	1.03053e-07	2.40525	0.05	0.009	0.001394	AD	BRD8
SLC35F1	1.03126e-07	4.11753	0.028	0.001	0.00139498	AD	SLC35F1
TNIP1	1.03513e-07	3.92283	0.028	0.001	0.00140023	AD	TNIP1
PCF11	1.03513e-07	3.77121	0.028	0.001	0.00140023	AD	PCF11
STX6	1.044e-07	1.66493	0.058	0.012	0.00141222	AD	STX6
FAM214A	1.04592e-07	2.17288	0.05	0.009	0.00141481	AD	FAM214A
PRPSAP1	1.04804e-07	0.627069	0.118	0.043	0.00141769	AD	PRPSAP1
CPNE1	1.0485e-07	2.00192	0.05	0.009	0.00141831	AD	CPNE1
CRAT	1.05534e-07	2.05545	0.054	0.01	0.00142756	AD	CRAT
KCNN2	1.06765e-07	2.02327	0.052	0.01	0.00144421	AD	KCNN2
LRRC271	1.07149e-07	0.410662	0.116	0.043	0.0014494	AD	LRRC27
CDK5R1	1.0746e-07	1.51955	0.062	0.014	0.00145361	AD	CDK5R1
SLC44A21	1.07473e-07	0.37123	0.313	0.171	0.00145379	AD	SLC44A2
XPO6	1.08437e-07	1.65793	0.058	0.012	0.00146683	AD	XPO6
HSPA9	1.09279e-07	0.287464	0.281	0.147	0.00147822	AD	HSPA9
ASCC1	1.09386e-07	1.39473	0.074	0.02	0.00147967	AD	ASCC1
STEAP3	1.09429e-07	1.09588	0.062	0.014	0.00148025	AD	STEAP3
ZNF592	1.09862e-07	1.81739	0.048	0.008	0.0014861	AD	ZNF592
CYC1	1.09885e-07	1.76019	0.052	0.01	0.00148641	AD	CYC1
SAP30L	1.11245e-07	1.99656	0.05	0.009	0.00150481	AD	SAP30L
KCNIP21	1.11672e-07	0.296673	0.341	0.186	0.00151058	AD	KCNIP2
ECH1	1.11751e-07	1.54626	0.058	0.012	0.00151165	AD	ECH1
TRAM1	1.11879e-07	1.77099	0.056	0.011	0.00151338	AD	TRAM1
TBCD	1.12545e-07	1.73464	0.054	0.01	0.0015224	AD	TBCD
SEL1L	1.12744e-07	1.50334	0.06	0.013	0.00152509	AD	SEL1L
CFAP70	1.12912e-07	0.661125	0.131	0.052	0.00152736	AD	CFAP70
HADH	1.13679e-07	1.57309	0.056	0.011	0.00153773	AD	HADH
ZNF768	1.13739e-07	1.71583	0.05	0.009	0.00153855	AD	ZNF768
FAM160B2	1.13938e-07	1.70314	0.056	0.011	0.00154124	AD	FAM160B2
EIF1B	1.1403e-07	1.20055	0.076	0.021	0.00154248	AD	EIF1B
PRPF4B	1.14301e-07	1.6794	0.05	0.009	0.00154615	AD	PRPF4B
ACAA2	1.16263e-07	0.974766	0.078	0.022	0.00157269	AD	ACAA2
FAM98B	1.16324e-07	1.17466	0.084	0.025	0.00157352	AD	FAM98B
TEF	1.17662e-07	0.241857	0.432	0.25	0.00159162	AD	TEF
STARD7	1.17956e-07	0.863245	0.118	0.044	0.00159559	AD	STARD7
CCDC28A	1.18076e-07	1.6474	0.052	0.01	0.00159721	AD	CCDC28A
SCAMP2	1.18707e-07	1.2337	0.056	0.011	0.00160575	AD	SCAMP2
MLLT11	1.19177e-07	0.691887	0.165	0.074	0.00161211	AD	MLLT11
MED15	1.19342e-07	0.679862	0.104	0.036	0.00161434	AD	MED15
TF	1.19524e-07	0.811497	0.129	0.051	0.00161679	AD	TF
SOCS7	1.19727e-07	1.59433	0.054	0.01	0.00161954	AD	SOCS7
PDK4	1.20065e-07	0.838712	0.062	0.014	0.00162412	AD	PDK4
CACNA2D3	1.20413e-07	0.745023	0.155	0.069	0.00162882	AD	CACNA2D3
UBE2L6	1.20935e-07	1.76744	0.052	0.01	0.00163589	AD	UBE2L6
PGLS	1.23123e-07	1.6868	0.054	0.01	0.00166548	AD	PGLS
CALCOCO1	1.23631e-07	0.913722	0.1	0.034	0.00167235	AD	CALCOCO1
GFAP1	1.23728e-07	0.111064	1	1	0.00167366	AD	GFAP
GOSR1	1.23787e-07	0.824585	0.106	0.037	0.00167447	AD	GOSR1
ASB6	1.24267e-07	1.23616	0.05	0.009	0.00168096	AD	ASB6
ALDH4A1	1.24759e-07	1.28172	0.058	0.012	0.00168761	AD	ALDH4A1
TGFB3	1.27513e-07	1.06259	0.074	0.02	0.00172486	AD	TGFB3
KSR1	1.27871e-07	1.16325	0.072	0.019	0.00172971	AD	KSR1
MAN2C1	1.28479e-07	1.26311	0.074	0.02	0.00173794	AD	MAN2C1
ITGAV	1.30296e-07	0.67116	0.137	0.056	0.00176251	AD	ITGAV
CPNE3	1.30599e-07	1.62261	0.072	0.019	0.00176661	AD	CPNE3
ZKSCAN1	1.34153e-07	2.93436	0.036	0.003	0.00181469	AD	ZKSCAN1
MCM3AP	1.34153e-07	3.02878	0.036	0.003	0.00181469	AD	MCM3AP
HOMER3	1.34445e-07	1.42093	0.07	0.018	0.00181864	AD	HOMER3
CACNB2	1.38942e-07	0.400174	0.227	0.115	0.00187947	AD	CACNB2
ASPSCR1	1.39923e-07	1.0145	0.072	0.019	0.00189274	AD	ASPSCR1
UTP3	1.40918e-07	2.47613	0.036	0.003	0.0019062	AD	UTP3
BEGAIN	1.41438e-07	0.857426	0.092	0.03	0.00191323	AD	BEGAIN
S1PR1	1.42112e-07	6.58976	0.024	0	0.00192234	AD	S1PR1
PPP2R2D	1.42112e-07	7.31725	0.024	0	0.00192234	AD	PPP2R2D
EIF3D	1.42112e-07	7.00502	0.024	0	0.00192234	AD	EIF3D
CYSTM1	1.42451e-07	0.208917	0.175	0.079	0.00192694	AD	CYSTM1
FGFRL1	1.42818e-07	0.267574	0.345	0.193	0.0019319	AD	FGFRL1
MYEF2	1.43448e-07	1.03655	0.102	0.036	0.00194042	AD	MYEF2
UBXN11	1.44811e-07	0.789753	0.098	0.033	0.00195886	AD	UBXN11
MMP24OS	1.47652e-07	0.2701	0.163	0.071	0.00199729	AD	MMP24OS
UBA2	1.49749e-07	0.834571	0.143	0.061	0.00202565	AD	UBA2
CALU	1.57642e-07	1.22456	0.08	0.023	0.00213243	AD	CALU
MORN1	1.62905e-07	1.43289	0.068	0.017	0.00220362	AD	MORN1
INCENP	1.63045e-07	1.28971	0.086	0.027	0.0022055	AD	INCENP
METAP2	1.63782e-07	1.22658	0.08	0.023	0.00221548	AD	METAP2
SNX27	1.64515e-07	0.930559	0.114	0.043	0.0022254	AD	SNX27
DDX41	1.68265e-07	0.733566	0.116	0.043	0.00227613	AD	DDX41
ATP6V1B2	1.69211e-07	0.292843	0.43	0.254	0.00228892	AD	ATP6V1B2
COPG1	1.71133e-07	1.23707	0.11	0.041	0.00231491	AD	COPG1
DCHS2	1.72322e-07	0.860494	0.09	0.029	0.002331	AD	DCHS2
SMIM29	1.75415e-07	0.437955	0.167	0.076	0.00237284	AD	SMIM29
ATF7IP	1.75863e-07	1.27159	0.078	0.023	0.0023789	AD	ATF7IP
CEP192	1.76943e-07	1.35215	0.068	0.017	0.00239351	AD	CEP192
DDX25	1.76981e-07	2.7003	0.038	0.004	0.00239402	AD	DDX25
PITPNA	1.78522e-07	0.237484	0.341	0.189	0.00241487	AD	PITPNA
SBNO1	1.81363e-07	0.715731	0.104	0.036	0.0024533	AD	SBNO1
YAP1	1.81866e-07	0.57911	0.157	0.07	0.0024601	AD	YAP1
BPTF	1.8191e-07	0.411031	0.135	0.055	0.0024607	AD	BPTF
KMT2C	1.82899e-07	0.477388	0.197	0.095	0.00247407	AD	KMT2C
MAPK8	1.82909e-07	1.03546	0.088	0.028	0.00247421	AD	MAPK8
BOD1L1	1.84902e-07	2.23788	0.038	0.004	0.00250117	AD	BOD1L1
UNC13A	1.85713e-07	2.25556	0.038	0.004	0.00251214	AD	UNC13A
JAK1	1.86159e-07	4.00389	0.03	0.002	0.00251817	AD	JAK1
ZNF451	1.88763e-07	1.49243	0.066	0.017	0.00255339	AD	ZNF451
BRSK2	1.89881e-07	1.69174	0.064	0.016	0.00256852	AD	BRSK2
COPE	1.90046e-07	0.209169	0.394	0.224	0.00257075	AD	COPE
PRCP	1.90359e-07	0.260716	0.241	0.124	0.00257499	AD	PRCP
KITLG	1.91994e-07	1.33302	0.066	0.017	0.0025971	AD	KITLG
DVL3	1.94807e-07	1.02234	0.078	0.023	0.00263516	AD	DVL3
PSMD13	2.03066e-07	0.588954	0.12	0.046	0.00274687	AD	PSMD13
FAM20C	2.04281e-07	0.502135	0.124	0.049	0.00276331	AD	FAM20C
ZMYND8	2.05525e-07	0.753914	0.124	0.049	0.00278014	AD	ZMYND8
IFI27L2	2.09273e-07	0.631456	0.185	0.089	0.00283083	AD	IFI27L2
B3GLCT	2.11216e-07	2.28855	0.04	0.005	0.00285712	AD	B3GLCT
CLIP4	2.13231e-07	0.393216	0.251	0.131	0.00288437	AD	CLIP4
PPFIA1	2.14758e-07	0.162539	0.329	0.182	0.00290503	AD	PPFIA1
RBP1	2.14783e-07	2.50166	0.04	0.005	0.00290537	AD	RBP1
SCYL1	2.15684e-07	2.27542	0.04	0.005	0.00291755	AD	SCYL1
H1F0	2.18408e-07	2.5501	0.04	0.005	0.00295441	AD	H1F0
RHBDD3	2.18774e-07	1.55444	0.06	0.014	0.00295936	AD	RHBDD3
FAM189B	2.19018e-07	2.31917	0.04	0.005	0.00296266	AD	FAM189B
SPSB3	2.20004e-07	1.60091	0.062	0.015	0.00297599	AD	SPSB3
LRRC37A2	2.2055e-07	2.39498	0.04	0.005	0.00298338	AD	LRRC37A2
ADNP	2.20844e-07	0.927129	0.094	0.031	0.00298735	AD	ADNP
MED29	2.23133e-07	1.13833	0.064	0.016	0.00301831	AD	MED29
UBA5	2.25222e-07	1.17818	0.076	0.022	0.00304658	AD	UBA5
STRN3	2.25557e-07	0.987754	0.078	0.023	0.00305111	AD	STRN3
ATF6B	2.27021e-07	0.815964	0.086	0.027	0.00307091	AD	ATF6B
RABGAP1	2.27202e-07	0.425965	0.211	0.104	0.00307336	AD	RABGAP1
SLC25A37	2.29825e-07	1.46732	0.074	0.021	0.00310884	AD	SLC25A37
PSMB2	2.30899e-07	0.680726	0.157	0.07	0.00312338	AD	PSMB2
CCDC85C	2.31921e-07	0.328451	0.145	0.062	0.00313719	AD	CCDC85C
PSMB7	2.33137e-07	0.442778	0.213	0.105	0.00315364	AD	PSMB7
ZXDC	2.36738e-07	2.38215	0.042	0.006	0.00320235	AD	ZXDC
GOLGA4	2.38069e-07	0.876784	0.116	0.044	0.00322036	AD	GOLGA4
ZNF462	2.38927e-07	1.13216	0.062	0.015	0.00323197	AD	ZNF462
GCDH	2.39184e-07	0.611404	0.066	0.017	0.00323545	AD	GCDH
PSMF1	2.39497e-07	0.975746	0.092	0.03	0.00323967	AD	PSMF1
NFAT5	2.4279e-07	0.232136	0.243	0.123	0.00328422	AD	NFAT5
POLR2G	2.43287e-07	1.21182	0.082	0.025	0.00329094	AD	POLR2G
TMEM33	2.43784e-07	2.66483	0.044	0.007	0.00329767	AD	TMEM33
GRAMD1A	2.43821e-07	2.29253	0.042	0.006	0.00329817	AD	GRAMD1A
ZFP90	2.43866e-07	1.03419	0.076	0.022	0.00329878	AD	ZFP90
PLD2	2.44149e-07	1.03354	0.062	0.015	0.00330261	AD	PLD2
PITRM1	2.45779e-07	2.00191	0.056	0.012	0.00332465	AD	PITRM1
MKRN1	2.46118e-07	2.26276	0.042	0.006	0.00332924	AD	MKRN1
CYP2J2	2.46923e-07	1.51748	0.06	0.014	0.00334013	AD	CYP2J2
MAPKAPK3	2.51783e-07	1.79338	0.042	0.006	0.00340586	AD	MAPKAPK3
SLC12A4	2.5375e-07	1.22206	0.074	0.021	0.00343248	AD	SLC12A4
RNF13	2.56059e-07	0.9881	0.102	0.036	0.00346371	AD	RNF13
LHPP	2.56432e-07	1.46424	0.06	0.014	0.00346876	AD	LHPP
ENHO	2.57382e-07	0.284835	0.771	0.599	0.00348161	AD	ENHO
MVP	2.58608e-07	1.98769	0.042	0.006	0.00349819	AD	MVP
P4HB	2.61607e-07	1.70803	0.058	0.013	0.00353876	AD	P4HB
SERF21	2.61633e-07	0.188879	0.458	0.261	0.00353911	AD	SERF2
RANBP2	2.61867e-07	1.40797	0.06	0.014	0.00354228	AD	RANBP2
TMEM220	2.62024e-07	2.19203	0.052	0.01	0.00354439	AD	TMEM220
RASGEF1A	2.62677e-07	0.41535	0.133	0.055	0.00355324	AD	RASGEF1A
CLPX	2.6273e-07	1.59795	0.058	0.013	0.00355396	AD	CLPX
DDB1	2.65759e-07	0.238736	0.51	0.301	0.00359492	AD	DDB1
AP1G1	2.67621e-07	2.00688	0.054	0.011	0.00362011	AD	AP1G1
SMDT1	2.78527e-07	1.03514	0.106	0.039	0.00376763	AD	SMDT1
CCAR1	2.79986e-07	1.16086	0.1	0.036	0.00378737	AD	CCAR1
SEC13	2.8044e-07	2.28876	0.048	0.009	0.00379352	AD	SEC13
MROH1	2.81843e-07	0.761303	0.098	0.034	0.00381249	AD	MROH1
ZC3H18	2.82252e-07	1.38617	0.058	0.013	0.00381802	AD	ZC3H18
MARCH5	2.82706e-07	1.43419	0.072	0.02	0.00382417	AD	MARCH5
TSC22D2	2.84438e-07	0.601153	0.084	0.026	0.00384759	AD	TSC22D2
FBXO31	2.8588e-07	1.53419	0.056	0.012	0.0038671	AD	FBXO31
SLC23A2	2.87467e-07	1.06351	0.082	0.025	0.00388856	AD	SLC23A2
SND1	2.88552e-07	0.386891	0.229	0.116	0.00390324	AD	SND1
AXL	2.8864e-07	0.685507	0.104	0.037	0.00390443	AD	AXL
SELENBP1	2.88842e-07	0.274878	0.289	0.155	0.00390716	AD	SELENBP1
ESF1	2.89468e-07	2.03476	0.046	0.008	0.00391564	AD	ESF1
RHOQ	2.91223e-07	1.77596	0.052	0.01	0.00393937	AD	RHOQ
TPRG1L	2.9131e-07	1.9238	0.05	0.01	0.00394055	AD	TPRG1L
MIEF1	2.91601e-07	3.0864	0.032	0.003	0.00394449	AD	MIEF1
ACBD4	2.91996e-07	1.77999	0.05	0.01	0.00394983	AD	ACBD4
ZNF787	2.92042e-07	1.753	0.054	0.011	0.00395045	AD	ZNF787
TBC1D10A	2.9358e-07	1.22885	0.044	0.007	0.00397126	AD	TBC1D10A
NDUFV3	2.94021e-07	1.14397	0.094	0.032	0.00397722	AD	NDUFV3
ARHGAP31	2.94434e-07	3.29919	0.032	0.003	0.00398281	AD	ARHGAP31
COQ8B	2.94666e-07	0.914549	0.082	0.025	0.00398595	AD	COQ8B
RAB11FIP5	2.95384e-07	3.48221	0.032	0.003	0.00399567	AD	RAB11FIP5
SNRPC	2.95384e-07	3.20922	0.032	0.003	0.00399567	AD	SNRPC
RFNG	2.96044e-07	0.951584	0.056	0.012	0.00400459	AD	RFNG
DNAJC17	3.00028e-07	1.80801	0.052	0.01	0.00405848	AD	DNAJC17
EGFR	3.0018e-07	2.86638	0.032	0.003	0.00406054	AD	EGFR
LIMK1	3.0018e-07	3.10899	0.032	0.003	0.00406054	AD	LIMK1
PTPN12	3.06035e-07	2.51084	0.032	0.003	0.00413973	AD	PTPN12
WDR37	3.08019e-07	1.1156	0.088	0.029	0.00416658	AD	WDR37
NCBP2	3.10942e-07	1.27585	0.07	0.019	0.00420611	AD	NCBP2
FAT3	3.13225e-07	0.487252	0.147	0.063	0.004237	AD	FAT3
CUL9	3.13486e-07	1.61102	0.046	0.008	0.00424052	AD	CUL9
MAPK11	3.13572e-07	0.981024	0.072	0.02	0.00424169	AD	MAPK11
SLC25A17	3.14016e-07	0.818443	0.058	0.013	0.0042477	AD	SLC25A17
C3orf18	3.15897e-07	0.763963	0.072	0.02	0.00427314	AD	C3orf18
CHST1	3.16246e-07	0.398879	0.133	0.055	0.00427786	AD	CHST1
PCYT1A	3.18526e-07	1.73604	0.05	0.01	0.0043087	AD	PCYT1A
SSBP3	3.22586e-07	0.467512	0.255	0.138	0.00436363	AD	SSBP3
GAS8	3.22972e-07	0.604393	0.072	0.02	0.00436885	AD	GAS8
SALL2	3.25245e-07	0.146592	0.406	0.233	0.00439959	AD	SALL2
MTERF4	3.27956e-07	0.908925	0.094	0.032	0.00443627	AD	MTERF4
OTUD7B	3.28193e-07	0.415457	0.157	0.07	0.00443946	AD	OTUD7B
LAMA5	3.29164e-07	4.97112	0.026	0.001	0.0044526	AD	LAMA5
ERBB2	3.29787e-07	0.296496	0.137	0.057	0.00446103	AD	ERBB2
WASF2	3.29944e-07	0.422154	0.183	0.087	0.00446316	AD	WASF2
RNF20	3.30705e-07	1.31345	0.05	0.01	0.00447345	AD	RNF20
PTPN4	3.31597e-07	1.49409	0.068	0.018	0.00448551	AD	PTPN4
USP53	3.34116e-07	4.49633	0.026	0.001	0.00451958	AD	USP53
DIDO1	3.3735e-07	0.940476	0.088	0.029	0.00456333	AD	DIDO1
SUGP2	3.39456e-07	0.851897	0.072	0.02	0.00459182	AD	SUGP2
JARID2	3.44113e-07	0.653137	0.052	0.01	0.00465482	AD	JARID2
NAT14	3.46981e-07	1.0956	0.092	0.031	0.00469362	AD	NAT14
IVD	3.4855e-07	0.627648	0.11	0.041	0.00471483	AD	IVD
AKIRIN1	3.57165e-07	1.31299	0.068	0.018	0.00483138	AD	AKIRIN1
PSMD3	3.62382e-07	1.4755	0.076	0.023	0.00490193	AD	PSMD3
SERPINA5	3.62721e-07	1.41993	0.066	0.017	0.00490652	AD	SERPINA5
RABGGTB	3.68196e-07	1.36061	0.068	0.018	0.00498059	AD	RABGGTB
MROH8	3.69786e-07	3.85656	0.034	0.003	0.00500209	AD	MROH8
NAV3	3.76376e-07	0.89398	0.07	0.019	0.00509124	AD	NAV3
SNX2	3.77889e-07	1.18835	0.084	0.027	0.00511171	AD	SNX2
ZC2HC1A	3.77944e-07	0.648996	0.1	0.036	0.00511245	AD	ZC2HC1A
UBAP2L	3.78395e-07	0.997009	0.078	0.023	0.00511855	AD	UBAP2L
ZFHX4	3.85418e-07	0.509688	0.157	0.07	0.00521355	AD	ZFHX4
ZMAT21	3.94498e-07	0.35811	0.217	0.109	0.00533637	AD	ZMAT2
YKT6	3.96424e-07	0.82541	0.104	0.038	0.00536242	AD	YKT6
THRB	4.01423e-07	1.12229	0.076	0.023	0.00543006	AD	THRB
NEFM	4.0273e-07	0.55603	0.153	0.069	0.00544772	AD	NEFM
REEP5	4.07861e-07	0.415661	0.267	0.146	0.00551714	AD	REEP5
ELAC2	4.08774e-07	3.0006	0.034	0.003	0.00552949	AD	ELAC2
SNX19	4.10058e-07	0.603332	0.131	0.055	0.00554685	AD	SNX19
SPAST	4.12509e-07	2.90803	0.034	0.003	0.00558001	AD	SPAST
ZC3H15	4.12821e-07	1.15274	0.066	0.017	0.00558424	AD	ZC3H15
PPHLN1	4.12821e-07	1.44235	0.066	0.017	0.00558424	AD	PPHLN1
KCTD2	4.13761e-07	2.85688	0.034	0.003	0.00559695	AD	KCTD2
SLC11A2	4.15017e-07	2.56149	0.034	0.003	0.00561394	AD	SLC11A2
SRC	4.23912e-07	2.4668	0.034	0.003	0.00573426	AD	SRC
H3F3B	4.24834e-07	0.367213	0.171	0.079	0.00574673	AD	H3F3B
GHITM	4.25598e-07	0.426609	0.185	0.089	0.00575707	AD	GHITM
NPC2	4.34366e-07	0.349617	0.251	0.133	0.00587567	AD	NPC2
MOB3A	4.36939e-07	2.15954	0.034	0.003	0.00591047	AD	MOB3A
AMFR	4.3989e-07	1.18472	0.066	0.017	0.0059504	AD	AMFR
ADD1	4.41569e-07	0.101362	0.546	0.314	0.00597311	AD	ADD1
CEP170	4.45025e-07	1.11003	0.082	0.026	0.00601986	AD	CEP170
ACACA	4.53404e-07	0.931301	0.09	0.03	0.0061332	AD	ACACA
MLST8	4.64398e-07	1.11289	0.064	0.017	0.00628191	AD	MLST8
DCTN3	4.71094e-07	0.585628	0.153	0.069	0.00637249	AD	DCTN3
PPARA	4.72178e-07	0.574462	0.092	0.031	0.00638715	AD	PPARA
MCM7	4.73139e-07	6.57818	0.022	0	0.00640015	AD	MCM7
GID4	4.73139e-07	6.90392	0.022	0	0.00640015	AD	GID4
INSR	4.73139e-07	6.73142	0.022	0	0.00640015	AD	INSR
MCAT	4.73139e-07	7.31273	0.022	0	0.00640015	AD	MCAT
UBE2I1	4.79097e-07	0.287062	0.267	0.142	0.00648075	AD	UBE2I
VPS4A	4.95491e-07	0.268411	0.235	0.122	0.00670251	AD	VPS4A
RPP25L	4.9745e-07	2.88289	0.036	0.004	0.006729	AD	RPP25L
MBNL2	5.00838e-07	0.296731	0.277	0.149	0.00677484	AD	MBNL2
[truncated: 330 more rows]

## Sheet: Ast_SO
Unnamed: 0	p_val	avg_log2FC	pct.1	pct.2	p_val_adj	cluster	gene
HSPA1B	3.04073e-173	1.99367	0.644	0.289	4.11319e-169	Control	HSPA1B
HSPA1A	1.95563e-140	2.00527	0.564	0.256	2.64538e-136	Control	HSPA1A
HSP90AA1	4.5484e-113	0.557122	1	0.995	6.15262e-109	Control	HSP90AA1
HSPA8	3.1456e-79	0.669262	0.915	0.809	4.25505e-75	Control	HSPA8
DNAJB1	2.07845e-76	2.00011	0.346	0.13	2.81152e-72	Control	DNAJB1
ITM2C	1.98935e-60	0.606733	0.884	0.796	2.691e-56	Control	ITM2C
B2M	4.02758e-58	2.25748	0.2	0.054	5.4481e-54	Control	B2M
NCAN	8.27018e-57	1.13883	0.57	0.35	1.11871e-52	Control	NCAN
CKB	4.94394e-50	0.497602	0.999	0.999	6.68767e-46	Control	CKB
HSP90AB1	8.3875e-50	1.01315	0.625	0.432	1.13458e-45	Control	HSP90AB1
PEBP1	6.6541e-39	0.369681	0.929	0.94	9.001e-35	Control	PEBP1
PSAP	1.11425e-38	0.268315	0.997	0.998	1.50725e-34	Control	PSAP
RTN1	4.00865e-37	1.4536	0.415	0.257	5.42251e-33	Control	RTN1
IFI6	1.28354e-36	4.11554	0.073	0.009	1.73624e-32	Control	IFI6
HSPH1	5.18935e-32	1.72371	0.142	0.045	7.01963e-28	Control	HSPH1
MAP1B	2.12721e-30	0.264616	0.973	0.978	2.87747e-26	Control	MAP1B
FBXO2	2.16222e-30	0.643087	0.689	0.603	2.92484e-26	Control	FBXO2
APOE	6.40562e-30	0.395566	0.998	0.994	8.66489e-26	Control	APOE
PLEKHB1	7.51295e-30	0.32599	0.885	0.888	1.01628e-25	Control	PLEKHB1
AQP4	2.15071e-28	0.285979	0.998	0.999	2.90926e-24	Control	AQP4
LMO3	2.37852e-28	0.596765	0.839	0.775	3.21743e-24	Control	LMO3
UBC	4.12605e-27	0.155026	1	1	5.58131e-23	Control	UBC
DKK3	9.51537e-27	0.381103	0.979	0.982	1.28714e-22	Control	DKK3
TUBA4A	1.42143e-26	1.1431	0.267	0.139	1.92277e-22	Control	TUBA4A
CHN1	1.76374e-24	0.463196	0.81	0.793	2.38581e-20	Control	CHN1
GPM6A	3.06077e-24	0.714889	0.952	0.964	4.1403e-20	Control	GPM6A
CHI3L2	6.07825e-24	1.72773	0.216	0.114	8.22205e-20	Control	CHI3L2
S1PR3	7.90395e-24	2.9338	0.053	0.008	1.06917e-19	Control	S1PR3
TUBB2A	8.95515e-24	0.713842	0.654	0.554	1.21136e-19	Control	TUBB2A
CST3	1.10817e-23	0.274863	0.998	0.998	1.49902e-19	Control	CST3
UBB	1.25451e-23	0.625943	0.713	0.635	1.69697e-19	Control	UBB
HSPB1	2.38193e-23	0.518688	0.71	0.687	3.22204e-19	Control	HSPB1
AQP1	7.32526e-23	0.354919	0.862	0.807	9.90888e-19	Control	AQP1
NAPB	7.33974e-23	0.952636	0.422	0.289	9.92846e-19	Control	NAPB
ATP1B2	1.27074e-22	0.382657	0.948	0.958	1.71893e-18	Control	ATP1B2
PFKFB2	1.79075e-22	0.881611	0.468	0.346	2.42234e-18	Control	PFKFB2
CXCL14	2.58839e-22	1.35641	0.285	0.177	3.50132e-18	Control	CXCL14
CTNNA2	8.09719e-21	0.718082	0.601	0.471	1.09531e-16	Control	CTNNA2
ISG15	3.80185e-19	5.92967	0.022	0	5.14277e-15	Control	ISG15
SOD1	1.61243e-18	0.240631	0.958	0.957	2.18113e-14	Control	SOD1
PEA15	2.23588e-18	0.170844	0.96	0.985	3.02447e-14	Control	PEA15
SLC22A17	1.64833e-17	0.541087	0.715	0.645	2.22969e-13	Control	SLC22A17
PYGM	6.34027e-17	1.46876	0.153	0.075	8.57649e-13	Control	PYGM
NSMF	1.20326e-16	0.350167	0.962	0.949	1.62765e-12	Control	NSMF
GFAP	1.45404e-16	0.13665	1	1	1.96688e-12	Control	GFAP
FKBP8	3.27284e-16	0.40125	0.811	0.773	4.42717e-12	Control	FKBP8
ENO1	4.30531e-16	0.214912	0.963	0.963	5.8238e-12	Control	ENO1
ABR	4.80375e-16	0.439831	0.765	0.687	6.49803e-12	Control	ABR
EZR	7.31278e-16	0.782588	0.391	0.289	9.892e-12	Control	EZR
NSF	1.52824e-15	0.856808	0.263	0.164	2.06726e-11	Control	NSF
IFI44L	1.63097e-15	5.52603	0.019	0.001	2.20621e-11	Control	IFI44L
CRELD1	1.97239e-15	0.895357	0.239	0.144	2.66805e-11	Control	CRELD1
ARNT2	2.48713e-15	0.637576	0.583	0.487	3.36434e-11	Control	ARNT2
DPYSL2	2.61341e-15	0.208542	0.986	0.986	3.53516e-11	Control	DPYSL2
INPP5F	4.48448e-15	0.975091	0.208	0.12	6.06616e-11	Control	INPP5F
ACTA2	5.16369e-15	1.65064	0.084	0.032	6.98493e-11	Control	ACTA2
RSPO2	5.26715e-15	1.15896	0.13	0.062	7.12487e-11	Control	RSPO2
AHSA1	5.72165e-15	0.693294	0.263	0.162	7.73967e-11	Control	AHSA1
VXN	1.01606e-14	0.563286	0.685	0.638	1.37443e-10	Control	VXN
S100A1	1.44307e-14	0.353031	0.916	0.928	1.95204e-10	Control	S100A1
ID2	1.61015e-14	0.653308	0.574	0.496	2.17805e-10	Control	ID2
PTGDS	1.85075e-14	0.127454	0.817	0.896	2.50351e-10	Control	PTGDS
NCDN	5.11065e-14	0.277196	0.862	0.857	6.91318e-10	Control	NCDN
PHGDH	5.77212e-14	0.680104	0.421	0.323	7.80794e-10	Control	PHGDH
IFIT3	1.13724e-13	4.40167	0.02	0.001	1.53834e-09	Control	IFIT3
AKT3	2.08389e-13	0.473346	0.691	0.642	2.81888e-09	Control	AKT3
NRXN1	2.27125e-13	0.429718	0.705	0.665	3.07232e-09	Control	NRXN1
PJA2	4.05394e-13	0.655504	0.517	0.431	5.48376e-09	Control	PJA2
PPP2CB	5.91566e-13	0.171677	0.99	0.993	8.00212e-09	Control	PPP2CB
MAP2K4	7.20628e-13	1.14461	0.112	0.053	9.74794e-09	Control	MAP2K4
DDAH1	8.61325e-13	0.527841	0.706	0.658	1.16511e-08	Control	DDAH1
NEFM	1.04093e-12	0.823341	0.25	0.165	1.40806e-08	Control	NEFM
HLA-DRA	1.67186e-12	1.9256	0.036	0.008	2.26153e-08	Control	HLA-DRA
RTN4	2.90598e-12	0.38596	0.832	0.827	3.93092e-08	Control	RTN4
TIMP2	3.05808e-12	0.978607	0.146	0.081	4.13666e-08	Control	TIMP2
PLD3	4.03356e-12	0.700987	0.476	0.39	5.4562e-08	Control	PLD3
SLC25A48	7.93535e-12	1.5131	0.056	0.019	1.07341e-07	Control	SLC25A48
ARHGEF4	1.55026e-11	0.385448	0.905	0.875	2.09704e-07	Control	ARHGEF4
HSPB8	2.17383e-11	0.288863	0.768	0.727	2.94053e-07	Control	HSPB8
HSPA5	5.7263e-11	0.691655	0.296	0.213	7.74597e-07	Control	HSPA5
TAGLN	1.09149e-10	1.86951	0.031	0.007	1.47646e-06	Control	TAGLN
MANF	1.45238e-10	2.17237	0.025	0.005	1.96463e-06	Control	MANF
DDIT3	2.11735e-10	1.42728	0.045	0.014	2.86414e-06	Control	DDIT3
ENO2	2.80133e-10	0.461629	0.609	0.537	3.78936e-06	Control	ENO2
GRINA	4.73748e-10	0.49655	0.608	0.548	6.40838e-06	Control	GRINA
SIRPA	6.28106e-10	1.31887	0.065	0.027	8.49639e-06	Control	SIRPA
ITM2B	1.50799e-09	0.11931	0.988	0.992	2.03985e-05	Control	ITM2B
COX4I1	1.5849e-09	0.45658	0.624	0.573	2.1439e-05	Control	COX4I1
FTH1	1.712e-09	0.107736	0.996	0.999	2.31582e-05	Control	FTH1
PADI2	2.05586e-09	0.524911	0.404	0.322	2.78097e-05	Control	PADI2
MAP2K1	2.12456e-09	0.658886	0.424	0.337	2.87389e-05	Control	MAP2K1
NAT8L	2.42518e-09	0.525966	0.578	0.511	3.28054e-05	Control	NAT8L
NEFL	2.56863e-09	0.708019	0.267	0.193	3.47458e-05	Control	NEFL
ARPC5	2.8719e-09	1.83905	0.03	0.008	3.88483e-05	Control	ARPC5
ACO2	3.03644e-09	0.415281	0.593	0.533	4.1074e-05	Control	ACO2
GPRC5B	3.0721e-09	0.164373	0.893	0.924	4.15563e-05	Control	GPRC5B
SLC1A2	3.3272e-09	0.35943	0.949	0.975	4.5007e-05	Control	SLC1A2
ATP1B1	4.1581e-09	0.469455	0.317	0.23	5.62466e-05	Control	ATP1B1
AIFM3	4.43105e-09	0.871582	0.305	0.241	5.99388e-05	Control	AIFM3
DNAJA4	4.62869e-09	0.709755	0.158	0.097	6.26123e-05	Control	DNAJA4
APLNR	1.14592e-08	0.343334	0.654	0.634	0.000155008	Control	APLNR
PRNP	1.21001e-08	0.208462	0.929	0.95	0.000163678	Control	PRNP
LMX1A	1.85075e-08	5.87287	0.01	0	0.000250351	Control	LMX1A
RAX	1.87001e-08	1.37716	0.045	0.017	0.000252956	Control	RAX
ATP1A2	2.00074e-08	0.163376	0.992	0.997	0.00027064	Control	ATP1A2
GATM	3.01867e-08	0.516978	0.468	0.407	0.000408335	Control	GATM
DNAJA1	3.45808e-08	0.918064	0.111	0.064	0.000467775	Control	DNAJA1
SBSPON	5.44226e-08	1.41354	0.037	0.013	0.000736174	Control	SBSPON
THBS2	6.15857e-08	1.37386	0.028	0.008	0.00083307	Control	THBS2
HNRNPK	6.36011e-08	2.05931	0.021	0.004	0.000860332	Control	HNRNPK
HSPE1	6.68453e-08	0.734258	0.111	0.064	0.000904216	Control	HSPE1
RGMA	1.08548e-07	0.595026	0.404	0.352	0.00146833	Control	RGMA
MARCKSL1	1.13416e-07	0.761522	0.146	0.095	0.00153417	Control	MARCKSL1
MAPK10	1.37518e-07	0.252114	0.896	0.921	0.00186021	Control	MAPK10
MKNK2	1.38531e-07	1.16854	0.09	0.05	0.00187391	Control	MKNK2
ALDH2	1.48045e-07	0.396328	0.603	0.552	0.0020026	Control	ALDH2
IFI27L1	1.82479e-07	0.51215	0.095	0.053	0.00246839	Control	IFI27L1
SPG21	1.83921e-07	0.642832	0.097	0.054	0.0024879	Control	SPG21
PNMA1	2.38773e-07	0.902205	0.088	0.049	0.00322988	Control	PNMA1
DCTN1	2.45161e-07	0.637883	0.27	0.206	0.00331629	Control	DCTN1
KLHDC1	3.21944e-07	1.71969	0.024	0.007	0.00435493	Control	KLHDC1
RBP1	3.29382e-07	1.27298	0.041	0.016	0.00445555	Control	RBP1
FAM102A	3.39471e-07	0.713239	0.188	0.132	0.00459203	Control	FAM102A
RACK1	3.45608e-07	0.725889	0.085	0.046	0.00467504	Control	RACK1
CLU	4.09995e-07	0.106027	1	1	0.005546	Control	CLU
PMP2	4.39551e-07	0.138318	0.811	0.812	0.00594581	Control	PMP2
EDNRB	4.58155e-07	0.705309	0.311	0.257	0.00619747	Control	EDNRB
PEG10	5.69467e-07	0.744309	0.102	0.06	0.00770317	Control	PEG10
SPTAN1	6.74184e-07	0.242675	0.737	0.717	0.00911968	Control	SPTAN1
B4GAT1	7.73693e-07	0.360034	0.609	0.559	0.0104657	Control	B4GAT1
KLHL24	8.10731e-07	0.437259	0.497	0.44	0.0109668	Control	KLHL24
GABARAPL1	8.71545e-07	0.810081	0.138	0.091	0.0117894	Control	GABARAPL1
PFKP	9.02797e-07	0.229053	0.861	0.823	0.0122121	Control	PFKP
RPE65	1.04142e-06	1.59384	0.025	0.008	0.0140872	Control	RPE65
GABBR1	1.09046e-06	0.299307	0.79	0.749	0.0147506	Control	GABBR1
SNCG	1.28916e-06	0.380874	0.521	0.468	0.0174385	Control	SNCG
PRPH	1.47955e-06	1.86416	0.027	0.009	0.0200139	Control	PRPH
PBLD	1.49706e-06	1.3358	0.027	0.009	0.0202507	Control	PBLD
ZNF256	1.72646e-06	2.42765	0.014	0.002	0.0233538	Control	ZNF256
ITPKB	1.79888e-06	0.620332	0.356	0.308	0.0243334	Control	ITPKB
SERP1	2.15183e-06	0.442961	0.263	0.199	0.0291077	Control	SERP1
APC2	2.27616e-06	0.385563	0.565	0.526	0.0307896	Control	APC2
COX7C	2.80234e-06	0.165961	0.932	0.95	0.0379073	Control	COX7C
SRI	3.21698e-06	0.381622	0.117	0.073	0.043516	Control	SRI
PIGT	3.56631e-06	1.71963	0.018	0.005	0.0482415	Control	PIGT
MT1X	4.30588e-294	1.24798	0.955	0.764	5.82456e-290	Part	MT1X
S100B	1.57749e-219	0.525386	1	0.999	2.13387e-215	Part	S100B
ACTB	7.12901e-204	0.466886	1	0.999	9.64341e-200	Part	ACTB
NTRK2	5.02786e-180	0.527217	1	0.999	6.80118e-176	Part	NTRK2
GLUL	1.35954e-160	0.50081	1	0.996	1.83905e-156	Part	GLUL
SLC1A3	2.16401e-152	0.666084	0.997	0.991	2.92726e-148	Part	SLC1A3
CRYAB	2.21272e-147	0.406088	1	0.999	2.99315e-143	Part	CRYAB
MT3	4.87457e-141	0.486075	1	0.997	6.59383e-137	Part	MT3
C1orf61	3.42904e-132	0.731282	0.979	0.915	4.63846e-128	Part	C1orf61
MT2A	1.24506e-120	0.4342	0.997	0.988	1.68419e-116	Part	MT2A
SPP1	7.82202e-113	2.08282	0.406	0.159	1.05808e-108	Part	SPP1
CLU1	1.03324e-108	0.220445	1	1	1.39767e-104	Part	CLU
SPARCL1	9.13696e-94	0.533408	0.967	0.911	1.23596e-89	Part	SPARCL1
ACBD7	1.84111e-90	0.784228	0.779	0.562	2.49047e-86	Part	ACBD7
FTL	2.80169e-84	0.329611	0.996	0.998	3.78984e-80	Part	FTL
AHCYL1	9.69172e-83	0.471893	0.974	0.896	1.311e-78	Part	AHCYL1
UBC1	9.43204e-79	0.218107	1	1	1.27587e-74	Part	UBC
MGST1	2.104e-77	0.917001	0.695	0.548	2.84609e-73	Part	MGST1
CPE	2.26332e-76	0.326001	1	1	3.06159e-72	Part	CPE
PPDPF	4.06402e-75	0.933645	0.604	0.426	5.4974e-71	Part	PPDPF
SERPINA3	1.25013e-72	1.64974	0.617	0.552	1.69105e-68	Part	SERPINA3
SLC1A21	8.43002e-70	0.487044	0.979	0.962	1.14033e-65	Part	SLC1A2
HSP90AA11	3.93211e-69	0.224278	0.998	0.995	5.31896e-65	Part	HSP90AA1
APP	2.9053e-68	0.430465	0.87	0.787	3.93e-64	Part	APP
YWHAQ	1.69065e-63	0.770824	0.669	0.558	2.28694e-59	Part	YWHAQ
COPS9	2.05874e-61	0.649278	0.725	0.558	2.78486e-57	Part	COPS9
CNN3	8.18244e-60	0.55048	0.816	0.734	1.10684e-55	Part	CNN3
ETNPPL	1.14698e-59	0.75691	0.855	0.722	1.55152e-55	Part	ETNPPL
NPAS3	7.18326e-59	0.480076	0.882	0.775	9.71679e-55	Part	NPAS3
MT1E	1.65362e-58	0.194071	0.992	0.955	2.23685e-54	Part	MT1E
CST31	7.52184e-58	0.240223	1	0.997	1.01748e-53	Part	CST3
SOD11	6.94387e-54	0.341106	0.981	0.944	9.39297e-50	Part	SOD1
LGI1	2.53618e-53	0.577867	0.777	0.615	3.43069e-49	Part	LGI1
NCAM1	4.93399e-48	0.411021	0.846	0.768	6.67421e-44	Part	NCAM1
DBI	1.93139e-46	0.30025	0.958	0.939	2.61259e-42	Part	DBI
ZFAND5	4.97304e-45	0.539635	0.723	0.638	6.72703e-41	Part	ZFAND5
SCG3	1.78411e-44	0.612302	0.699	0.6	2.41337e-40	Part	SCG3
DTNA	2.13236e-43	0.240984	1	0.997	2.88445e-39	Part	DTNA
GJA1	3.24416e-43	0.341883	0.984	0.967	4.38838e-39	Part	GJA1
SEC11C	6.52559e-41	0.488776	0.711	0.635	8.82717e-37	Part	SEC11C
ATP5F1E	8.90922e-40	0.342908	0.809	0.739	1.20515e-35	Part	ATP5F1E
GSN	7.55655e-39	0.364819	0.784	0.738	1.02217e-34	Part	GSN
GABARAP	1.09207e-37	0.601812	0.605	0.537	1.47724e-33	Part	GABARAP
ITGB8	7.59232e-37	0.581029	0.634	0.565	1.02701e-32	Part	ITGB8
PRNP1	1.39879e-36	0.218966	0.961	0.935	1.89214e-32	Part	PRNP
APOC1	1.30057e-34	1.20699	0.268	0.136	1.75928e-30	Part	APOC1
SCG2	1.37166e-33	1.16707	0.319	0.189	1.85544e-29	Part	SCG2
RHBDD2	5.92651e-33	0.704659	0.53	0.437	8.01679e-29	Part	RHBDD2
COX7C1	3.83274e-32	0.220582	0.967	0.932	5.18455e-28	Part	COX7C
PON2	5.27325e-32	0.541083	0.635	0.562	7.13313e-28	Part	PON2
TMBIM6	7.17013e-32	0.25678	0.917	0.859	9.69903e-28	Part	TMBIM6
HOPX	2.64718e-30	0.630766	0.618	0.547	3.58084e-26	Part	HOPX
DPP10	5.87752e-30	1.99813	0.129	0.043	7.95053e-26	Part	DPP10
HNRNPC	9.30937e-30	0.281957	0.824	0.777	1.25928e-25	Part	HNRNPC
SYT11	2.9368e-29	0.39649	0.717	0.653	3.9726e-25	Part	SYT11
PKIA	2.9623e-29	0.531929	0.623	0.53	4.00711e-25	Part	PKIA
SDC4	3.44974e-29	0.636695	0.62	0.525	4.66646e-25	Part	SDC4
HTRA1	1.48472e-28	0.691007	0.523	0.446	2.00838e-24	Part	HTRA1
RHOBTB3	2.39107e-28	0.443701	0.7	0.622	3.2344e-24	Part	RHOBTB3
CANX	2.43746e-28	0.656682	0.525	0.456	3.29715e-24	Part	CANX
SOD2	3.24376e-28	0.731269	0.497	0.431	4.38784e-24	Part	SOD2
ANK2	3.52578e-27	0.32953	0.826	0.8	4.76932e-23	Part	ANK2
RGR	1.5463e-26	1.89252	0.162	0.072	2.09168e-22	Part	RGR
ATP5ME	4.76783e-26	0.360641	0.688	0.619	6.44944e-22	Part	ATP5ME
ATP5F1B	1.76368e-25	0.353567	0.695	0.65	2.38573e-21	Part	ATP5F1B
JUNB	2.49174e-25	1.08192	0.27	0.163	3.37057e-21	Part	JUNB
CALM31	2.71132e-25	0.166947	0.947	0.926	3.6676e-21	Part	CALM3
TSPAN3	6.93946e-25	0.289005	0.742	0.707	9.38701e-21	Part	TSPAN3
SERINC1	8.13264e-25	0.614247	0.562	0.522	1.1001e-20	Part	SERINC1
CHCHD2	1.04519e-24	0.480898	0.576	0.508	1.41383e-20	Part	CHCHD2
FAM171B	2.42635e-24	0.349993	0.784	0.76	3.28212e-20	Part	FAM171B
WBP2	1.75424e-23	0.302649	0.727	0.699	2.37296e-19	Part	WBP2
PSAP1	3.53307e-23	0.150507	0.998	0.997	4.77919e-19	Part	PSAP
ARHGAP5	1.50337e-22	0.549054	0.526	0.439	2.03361e-18	Part	ARHGAP5
CD44	1.72464e-22	0.638666	0.624	0.616	2.33292e-18	Part	CD44
OCIAD1	2.87939e-22	0.334681	0.684	0.633	3.89496e-18	Part	OCIAD1
YWHAG	2.89669e-22	0.292533	0.737	0.722	3.91836e-18	Part	YWHAG
CSTB	3.07149e-22	0.716033	0.435	0.347	4.1548e-18	Part	CSTB
MRO	6.15717e-22	0.576237	0.534	0.438	8.3288e-18	Part	MRO
CYBRD1	6.76484e-22	1.42219	0.206	0.117	9.15081e-18	Part	CYBRD1
TUBB2A1	1.17613e-21	0.289952	0.644	0.541	1.59095e-17	Part	TUBB2A
GABRA2	2.32794e-21	0.432906	0.679	0.617	3.149e-17	Part	GABRA2
UQCRB	4.08848e-21	0.194684	0.866	0.867	5.53048e-17	Part	UQCRB
LYVE1	4.24685e-21	0.814774	0.247	0.145	5.74471e-17	Part	LYVE1
COX6C	4.27845e-21	0.252012	0.756	0.72	5.78746e-17	Part	COX6C
PABPC1	1.67026e-20	0.391677	0.629	0.607	2.25936e-16	Part	PABPC1
COX6B1	4.22097e-20	0.425701	0.574	0.511	5.7097e-16	Part	COX6B1
RTN41	4.47339e-20	0.153935	0.836	0.823	6.05115e-16	Part	RTN4
GJB6	1.20684e-19	1.32203	0.151	0.073	1.6325e-15	Part	GJB6
FOS	1.45039e-19	0.711595	0.366	0.268	1.96194e-15	Part	FOS
FTH11	1.61756e-19	0.135468	1	0.997	2.18808e-15	Part	FTH1
F31	2.1605e-19	0.589631	0.439	0.339	2.92251e-15	Part	F3
PTPRZ1	4.36696e-19	0.426017	0.604	0.554	5.90719e-15	Part	PTPRZ1
HILPDA	4.57923e-19	1.00701	0.309	0.225	6.19432e-15	Part	HILPDA
[truncated: 2,199 more rows]

## Sheet: Ast_SR
Unnamed: 0	p_val	avg_log2FC	pct.1	pct.2	p_val_adj	cluster	gene
[truncated: 3,557 more rows]

[truncated: 59 more sheets: Ast_SUB, Ast_VAS, Exc_CA1, Exc_CA2, Exc_CA3, Exc_CA4, Exc_DG, Exc_ML, Exc_SO, Exc_SR, Exc_SUB, Exc_VAS, Inh_CA1, Inh_CA3, Inh_CA4, Inh_ML, Inh_SO, Inh_SR, Inh_SUB, Mic_CA1 …]
